# Supplementary material for: Supramolecular Assemblies in Mn(II) and Zn(II) Metal-Organic Compounds Involving Phenanthroline and Benzoate: Experimental and Theoretical Studies
Source: Preprints.org preprint supplement (doi:10.20944/preprints202404.1039.v1), 2024-04-16
Supplement: Supplementary file 3 [file supplementary]

Archive with 5 entries (5 files):
- Zn_4-MeBz_2-AmPy.pdf
- Mn_Phen_2-ClBzH.cif
- Mn_Phen_2-ClBzH.pdf
- Supplementary Information.docx
- Zn_4-MeBz_2-AmPy.cif
