# Supplementary material for: Supramolecular Assemblies in Mn(II) and Zn(II) Metal-Organic Compounds Involving Phenanthroline and Benzoate: Experimental and Theoretical Studies
Source: Preprints.org preprint supplement (doi:10.20944/preprints202404.1039.v1), 2024-04-16
Supplement: Supplementary file 3 [file supplementary › Mn_Phen_2-ClBzH.cif]

 
data_shelx
 
_audit_creation_method            'SHELXL-2018/3'
_shelx_SHELXL_version_number      '2018/3'
_chemical_name_systematic         ?
_chemical_name_common             ?
_chemical_melting_point           ?
_chemical_formula_moiety          ?
_chemical_formula_sum
 'C31 H21 Cl3 Mn N4 O2' 
_chemical_formula_weight          642.81

loop_
 _atom_type_symbol
 _atom_type_description
 _atom_type_scat_dispersion_real
 _atom_type_scat_dispersion_imag
 _atom_type_scat_source
 'C'  'C'   0.0181   0.0091
 'International Tables Vol C Tables 4.2.6.8 and 6.1.1.4'
 'H'  'H'   0.0000   0.0000
 'International Tables Vol C Tables 4.2.6.8 and 6.1.1.4'
 'Cl'  'Cl'   0.3639   0.7018
 'International Tables Vol C Tables 4.2.6.8 and 6.1.1.4'
 'Mn'  'Mn'  -0.5299   2.8052
 'International Tables Vol C Tables 4.2.6.8 and 6.1.1.4'
 'N'  'N'   0.0311   0.0180
 'International Tables Vol C Tables 4.2.6.8 and 6.1.1.4'
 'O'  'O'   0.0492   0.0322
 'International Tables Vol C Tables 4.2.6.8 and 6.1.1.4'
 
_space_group_crystal_system       triclinic
_space_group_IT_number            2
_space_group_name_H-M_alt         'P -1'
_space_group_name_Hall            '-P 1'
 
_shelx_space_group_comment
;
The symmetry employed for this shelxl refinement is uniquely defined
by the following loop, which should always be used as a source of
symmetry information in preference to the above space-group names.
They are only intended as comments.
;
 
loop_
 _space_group_symop_operation_xyz
 'x, y, z'
 '-x, -y, -z'
 
_cell_length_a                    10.6563(18)
_cell_length_b                    10.9066(19)
_cell_length_c                    12.790(2)
_cell_angle_alpha                 89.159(9)
_cell_angle_beta                  66.391(7)
_cell_angle_gamma                 86.483(8)
_cell_volume                      1359.4(4)
_cell_formula_units_Z             2
_cell_measurement_temperature     100(2)
_cell_measurement_reflns_used     9190
_cell_measurement_theta_min       4.07
_cell_measurement_theta_max       68.47
 
_exptl_crystal_description        block
_exptl_crystal_colour             yellow
_exptl_crystal_density_meas       ?
_exptl_crystal_density_method     ?
_exptl_crystal_density_diffrn     1.570          
_exptl_crystal_F_000              654
_exptl_transmission_factor_min    ?
_exptl_transmission_factor_max    ?
_exptl_crystal_size_max           0.380
_exptl_crystal_size_mid           0.280
_exptl_crystal_size_min           0.250
_exptl_absorpt_coefficient_mu     6.977
_shelx_estimated_absorpt_T_min    0.177
_shelx_estimated_absorpt_T_max    0.274
_exptl_absorpt_correction_type    multi-scan
_exptl_absorpt_correction_T_min   0.3661
_exptl_absorpt_correction_T_max   0.7531
_exptl_absorpt_process_details    
;
SADABS-2016/2 (Bruker,2016) was used for absorption correction.
wR2(int) was 0.1536 before and 0.1054 after correction.
The Ratio of minimum to maximum transmission is 0.4861.
The \l/2 correction factor is Not present.
;
_exptl_absorpt_special_details    ?
_diffrn_ambient_temperature       100(2)
_diffrn_radiation_wavelength      1.54178
_diffrn_radiation_type            CuK\a
_diffrn_source                    ?
_diffrn_measurement_device_type   'Bruker D8 Venture'
_diffrn_measurement_method        '\f and \w scans'
_diffrn_detector_area_resol_mean  ?
_diffrn_reflns_number             20832
_diffrn_reflns_av_unetI/netI      0.0529
_diffrn_reflns_av_R_equivalents   0.0572
_diffrn_reflns_limit_h_min        -12
_diffrn_reflns_limit_h_max        12
_diffrn_reflns_limit_k_min        -12
_diffrn_reflns_limit_k_max        13
_diffrn_reflns_limit_l_min        -15
_diffrn_reflns_limit_l_max        15
_diffrn_reflns_theta_min          4.061
_diffrn_reflns_theta_max          68.914
_diffrn_reflns_theta_full         67.679
_diffrn_measured_fraction_theta_max   0.959
_diffrn_measured_fraction_theta_full  0.967
_diffrn_reflns_Laue_measured_fraction_max    0.959
_diffrn_reflns_Laue_measured_fraction_full   0.967
_diffrn_reflns_point_group_measured_fraction_max   0.959
_diffrn_reflns_point_group_measured_fraction_full  0.967
_reflns_number_total              4832
_reflns_number_gt                 4543
_reflns_threshold_expression      'I > 2\s(I)'
_reflns_Friedel_coverage          0.000
_reflns_Friedel_fraction_max      .
_reflns_Friedel_fraction_full     .
 
_reflns_special_details
;
 Reflections were merged by SHELXL according to the crystal
 class for the calculation of statistics and refinement.
 
 _reflns_Friedel_fraction is defined as the number of unique
 Friedel pairs measured divided by the number that would be
 possible theoretically, ignoring centric projections and
 systematic absences.
;
 
_computing_data_collection        ?
_computing_cell_refinement        ?
_computing_data_reduction         ?
_computing_structure_solution     ?
_computing_structure_refinement 'SHELXL-2018/3 (Sheldrick, 2018)'
_computing_molecular_graphics     ?
_computing_publication_material   ?
_refine_special_details           ?
_refine_ls_structure_factor_coef  Fsqd
_refine_ls_matrix_type            full
_refine_ls_weighting_scheme       calc
_refine_ls_weighting_details
'w=1/[\s^2^(Fo^2^)+(0.1680P)^2^+1.6149P] where P=(Fo^2^+2Fc^2^)/3'
_atom_sites_solution_primary      ?
_atom_sites_solution_secondary    ?
_atom_sites_solution_hydrogens    geom
_refine_ls_hydrogen_treatment     constr
_refine_ls_extinction_method      none
_refine_ls_extinction_coef        .
_refine_ls_number_reflns          4832
_refine_ls_number_parameters      371
_refine_ls_number_restraints      0
_refine_ls_R_factor_all           0.0812
_refine_ls_R_factor_gt            0.0773
_refine_ls_wR_factor_ref          0.2233
_refine_ls_wR_factor_gt           0.2158
_refine_ls_goodness_of_fit_ref    1.060
_refine_ls_restrained_S_all       1.060
_refine_ls_shift/su_max           0.000
_refine_ls_shift/su_mean          0.000
 
loop_
 _atom_site_label
 _atom_site_type_symbol
 _atom_site_fract_x
 _atom_site_fract_y
 _atom_site_fract_z
 _atom_site_U_iso_or_equiv
 _atom_site_adp_type
 _atom_site_occupancy
 _atom_site_site_symmetry_order  
 _atom_site_calc_flag
 _atom_site_refinement_flags_posn
 _atom_site_refinement_flags_adp
 _atom_site_refinement_flags_occupancy
 _atom_site_disorder_assembly
 _atom_site_disorder_group
Cl1 Cl 0.76308(10) 1.05313(8) 0.63296(8) 0.0296(3) Uani 1 1 d . . . . .
Mn1 Mn 0.73531(6) 0.83984(5) 0.69645(5) 0.0245(3) Uani 1 1 d . . . . .
Cl2 Cl 0.90606(9) 0.82675(9) 0.77937(8) 0.0315(3) Uani 1 1 d . . . . .
N1A N 0.8484(3) 0.7586(3) 0.5192(3) 0.0293(7) Uani 1 1 d . . . . .
C2A C 0.9170(4) 0.8228(4) 0.4279(4) 0.0329(9) Uani 1 1 d . . . . .
H2A H 0.922882 0.908435 0.436329 0.039 Uiso 1 1 calc R U . . .
C3A C 0.9818(5) 0.7690(5) 0.3184(4) 0.0403(11) Uani 1 1 d . . . . .
H3A H 1.028870 0.817763 0.253937 0.048 Uiso 1 1 calc R U . . .
C4A C 0.9759(5) 0.6456(5) 0.3065(4) 0.0421(11) Uani 1 1 d . . . . .
H4A H 1.020257 0.608176 0.233191 0.050 Uiso 1 1 calc R U . . .
C5A C 0.8964(5) 0.4431(5) 0.3949(5) 0.0424(11) Uani 1 1 d . . . . .
H5A H 0.939538 0.401864 0.323291 0.051 Uiso 1 1 calc R U . . .
C6A C 0.8280(5) 0.3777(4) 0.4890(4) 0.0393(11) Uani 1 1 d . . . . .
H6A H 0.824559 0.291360 0.482785 0.047 Uiso 1 1 calc R U . . .
C7A C 0.6892(5) 0.3736(4) 0.6967(5) 0.0397(11) Uani 1 1 d . . . . .
H7A H 0.680510 0.287658 0.693844 0.048 Uiso 1 1 calc R U . . .
C8A C 0.6313(5) 0.4365(4) 0.7984(4) 0.0399(10) Uani 1 1 d . . . . .
H8A H 0.582253 0.394714 0.867039 0.048 Uiso 1 1 calc R U . . .
C9A C 0.6455(5) 0.5640(4) 0.8000(4) 0.0366(10) Uani 1 1 d . . . . .
H9A H 0.605738 0.606333 0.871230 0.044 Uiso 1 1 calc R U . . .
N10A N 0.7111(4) 0.6274(3) 0.7076(3) 0.0306(8) Uani 1 1 d . . . . .
C11A C 0.8418(4) 0.6351(4) 0.5069(4) 0.0311(9) Uani 1 1 d . . . . .
C12A C 0.9055(4) 0.5737(4) 0.4006(4) 0.0355(10) Uani 1 1 d . . . . .
C13A C 0.7694(4) 0.5660(4) 0.6060(4) 0.0301(9) Uani 1 1 d . . . . .
C14A C 0.7608(4) 0.4371(4) 0.5977(4) 0.0348(10) Uani 1 1 d . . . . .
N1B N 0.5576(3) 0.8488(3) 0.8720(3) 0.0258(7) Uani 1 1 d . . . . .
C2B C 0.5697(4) 0.8461(4) 0.9709(3) 0.0272(8) Uani 1 1 d . . . . .
H2B H 0.659318 0.835281 0.969921 0.033 Uiso 1 1 calc R U . . .
C3B C 0.4593(4) 0.8582(4) 1.0762(4) 0.0303(9) Uani 1 1 d . . . . .
H3B H 0.473399 0.854596 1.145043 0.036 Uiso 1 1 calc R U . . .
C4B C 0.3292(4) 0.8756(4) 1.0786(4) 0.0291(8) Uani 1 1 d . . . . .
H4B H 0.252126 0.886347 1.149260 0.035 Uiso 1 1 calc R U . . .
C5B C 0.1794(4) 0.8939(4) 0.9696(4) 0.0315(9) Uani 1 1 d . . . . .
H5B H 0.099310 0.904626 1.038188 0.038 Uiso 1 1 calc R U . . .
C6B C 0.1673(4) 0.8946(4) 0.8689(4) 0.0327(9) Uani 1 1 d . . . . .
H6B H 0.078582 0.904709 0.867870 0.039 Uiso 1 1 calc R U . . .
C7B C 0.2764(4) 0.8818(4) 0.6565(4) 0.0323(9) Uani 1 1 d . . . . .
H7B H 0.189756 0.891218 0.651428 0.039 Uiso 1 1 calc R U . . .
C8B C 0.3946(4) 0.8691(4) 0.5600(4) 0.0306(9) Uani 1 1 d . . . . .
H8B H 0.391621 0.870675 0.486738 0.037 Uiso 1 1 calc R U . . .
C9B C 0.5206(4) 0.8539(4) 0.5710(4) 0.0290(8) Uani 1 1 d . . . . .
H9B H 0.602083 0.844966 0.503390 0.035 Uiso 1 1 calc R U . . .
N10B N 0.5322(3) 0.8512(3) 0.6694(3) 0.0265(7) Uani 1 1 d . . . . .
C11B C 0.4295(4) 0.8624(4) 0.8731(3) 0.0269(8) Uani 1 1 d . . . . .
C12B C 0.3113(4) 0.8773(4) 0.9753(4) 0.0286(8) Uani 1 1 d . . . . .
C13B C 0.4157(4) 0.8646(3) 0.7655(3) 0.0267(8) Uani 1 1 d . . . . .
C14B C 0.2850(4) 0.8805(4) 0.7633(4) 0.0268(8) Uani 1 1 d . . . . .
O1 O 0.5588(3) 0.4243(3) 0.3618(3) 0.0343(7) Uani 1 1 d . . . . .
H1 H 0.512343 0.415620 0.431894 0.051 Uiso 1 1 calc R U . . .
C2 C 0.6063(4) 0.5353(4) 0.3435(4) 0.0306(9) Uani 1 1 d . . . . .
O2 O 0.5845(3) 0.6108(3) 0.4191(3) 0.0351(7) Uani 1 1 d . . . . .
C3 C 0.6908(4) 0.5567(4) 0.2213(4) 0.0319(9) Uani 1 1 d . . . . .
C4 C 0.7297(4) 0.6726(4) 0.1753(4) 0.0310(9) Uani 1 1 d . . . . .
Cl4 Cl 0.67569(12) 0.80787(10) 0.25513(9) 0.0395(3) Uani 1 1 d . . . . .
C5 C 0.8095(5) 0.6866(4) 0.0608(4) 0.0370(10) Uani 1 1 d . . . . .
H5 H 0.836867 0.765623 0.031267 0.044 Uiso 1 1 calc R U . . .
C6 C 0.8498(6) 0.5840(5) -0.0111(4) 0.0460(12) Uani 1 1 d . . . . .
H6 H 0.903239 0.593390 -0.090285 0.055 Uiso 1 1 calc R U . . .
C7 C 0.8123(6) 0.4677(5) 0.0319(5) 0.0527(13) Uani 1 1 d . . . . .
H7 H 0.839965 0.397893 -0.017403 0.063 Uiso 1 1 calc R U . . .
C8 C 0.7349(5) 0.4551(4) 0.1465(4) 0.0421(11) Uani 1 1 d . . . . .
H8 H 0.710539 0.375503 0.175952 0.050 Uiso 1 1 calc R U . . .
 
loop_
 _atom_site_aniso_label
 _atom_site_aniso_U_11
 _atom_site_aniso_U_22
 _atom_site_aniso_U_33
 _atom_site_aniso_U_23
 _atom_site_aniso_U_13
 _atom_site_aniso_U_12
Cl1 0.0330(5) 0.0334(5) 0.0334(5) 0.0047(4) -0.0237(4) -0.0097(4)
Mn1 0.0230(4) 0.0315(4) 0.0283(4) 0.0027(3) -0.0193(3) -0.0076(3)
Cl2 0.0258(5) 0.0453(6) 0.0349(5) 0.0031(4) -0.0236(4) -0.0079(4)
N1A 0.0225(16) 0.0419(19) 0.0329(18) 0.0021(14) -0.0200(14) -0.0084(13)
C2A 0.027(2) 0.047(2) 0.036(2) 0.0042(18) -0.0233(18) -0.0119(17)
C3A 0.031(2) 0.066(3) 0.031(2) 0.003(2) -0.0185(19) -0.014(2)
C4A 0.031(2) 0.062(3) 0.043(3) -0.012(2) -0.024(2) -0.004(2)
C5A 0.033(2) 0.053(3) 0.051(3) -0.019(2) -0.028(2) 0.004(2)
C6A 0.036(2) 0.039(2) 0.058(3) -0.009(2) -0.034(2) -0.0001(18)
C7A 0.039(2) 0.029(2) 0.066(3) 0.004(2) -0.035(2) -0.0073(18)
C8A 0.043(3) 0.039(2) 0.046(3) 0.0082(19) -0.025(2) -0.0107(19)
C9A 0.037(2) 0.036(2) 0.046(3) 0.0027(19) -0.025(2) -0.0067(18)
N10A 0.0303(18) 0.0374(18) 0.0352(18) 0.0044(14) -0.0242(15) -0.0072(14)
C11A 0.0214(19) 0.045(2) 0.039(2) -0.0023(18) -0.0239(17) -0.0051(16)
C12A 0.026(2) 0.051(3) 0.041(2) -0.0110(19) -0.0250(19) -0.0032(18)
C13A 0.026(2) 0.034(2) 0.043(2) -0.0031(17) -0.0269(18) -0.0041(16)
C14A 0.029(2) 0.039(2) 0.051(3) -0.0040(19) -0.030(2) -0.0049(17)
N1B 0.0244(16) 0.0325(16) 0.0297(17) 0.0020(13) -0.0200(14) -0.0060(12)
C2B 0.0273(19) 0.0303(19) 0.033(2) 0.0059(15) -0.0212(17) -0.0069(15)
C3B 0.032(2) 0.039(2) 0.029(2) 0.0059(16) -0.0209(18) -0.0097(16)
C4B 0.028(2) 0.037(2) 0.031(2) 0.0021(16) -0.0192(17) -0.0107(16)
C5B 0.0226(19) 0.041(2) 0.038(2) -0.0025(17) -0.0186(17) -0.0071(16)
C6B 0.0223(19) 0.041(2) 0.044(2) 0.0021(18) -0.0213(18) -0.0084(16)
C7B 0.028(2) 0.035(2) 0.047(2) 0.0033(17) -0.0278(19) -0.0086(16)
C8B 0.034(2) 0.036(2) 0.034(2) 0.0053(16) -0.0249(18) -0.0089(16)
C9B 0.027(2) 0.035(2) 0.033(2) 0.0025(16) -0.0198(17) -0.0080(15)
N10B 0.0287(17) 0.0310(16) 0.0305(17) 0.0031(13) -0.0223(15) -0.0079(13)
C11B 0.026(2) 0.0301(19) 0.034(2) 0.0026(15) -0.0214(17) -0.0092(15)
C12B 0.025(2) 0.033(2) 0.034(2) 0.0006(16) -0.0158(17) -0.0116(15)
C13B 0.027(2) 0.0279(18) 0.034(2) 0.0027(15) -0.0208(17) -0.0082(15)
C14B 0.0240(19) 0.0319(19) 0.036(2) 0.0015(15) -0.0232(17) -0.0087(15)
O1 0.0389(17) 0.0383(16) 0.0337(15) 0.0064(12) -0.0217(14) -0.0138(13)
C2 0.028(2) 0.037(2) 0.037(2) 0.0042(17) -0.0231(18) -0.0074(16)
O2 0.0358(16) 0.0399(16) 0.0361(16) 0.0036(13) -0.0199(14) -0.0132(13)
C3 0.028(2) 0.042(2) 0.036(2) 0.0033(18) -0.0233(18) -0.0073(17)
C4 0.029(2) 0.041(2) 0.034(2) 0.0052(17) -0.0235(18) -0.0064(16)
Cl4 0.0518(7) 0.0355(6) 0.0409(6) 0.0055(4) -0.0277(5) -0.0115(4)
C5 0.039(2) 0.045(2) 0.038(2) 0.0114(18) -0.025(2) -0.0088(18)
C6 0.048(3) 0.055(3) 0.033(2) 0.008(2) -0.014(2) -0.004(2)
C7 0.065(4) 0.047(3) 0.043(3) 0.000(2) -0.017(3) -0.005(2)
C8 0.050(3) 0.040(2) 0.038(2) 0.0042(19) -0.020(2) -0.005(2)
 
_geom_special_details
;
 All esds (except the esd in the dihedral angle between two l.s. planes)
 are estimated using the full covariance matrix.  The cell esds are taken
 into account individually in the estimation of esds in distances, angles
 and torsion angles; correlations between esds in cell parameters are only
 used when they are defined by crystal symmetry.  An approximate (isotropic)
 treatment of cell esds is used for estimating esds involving l.s. planes.
;
 
loop_
 _geom_bond_atom_site_label_1
 _geom_bond_atom_site_label_2
 _geom_bond_distance
 _geom_bond_site_symmetry_2
 _geom_bond_publ_flag
Cl1 Mn1 2.4485(11) . ?
Mn1 N1A 2.261(4) . ?
Mn1 N1B 2.284(3) . ?
Mn1 N10B 2.320(3) . ?
Mn1 N10A 2.343(4) . ?
Mn1 Cl2 2.4424(11) . ?
N1A C2A 1.321(6) . ?
N1A C11A 1.369(6) . ?
C2A C3A 1.407(7) . ?
C2A H2A 0.9500 . ?
C3A C4A 1.365(8) . ?
C3A H3A 0.9500 . ?
C4A C12A 1.395(8) . ?
C4A H4A 0.9500 . ?
C5A C6A 1.351(8) . ?
C5A C12A 1.439(7) . ?
C5A H5A 0.9500 . ?
C6A C14A 1.427(7) . ?
C6A H6A 0.9500 . ?
C7A C8A 1.369(7) . ?
C7A C14A 1.390(7) . ?
C7A H7A 0.9500 . ?
C8A C9A 1.409(7) . ?
C8A H8A 0.9500 . ?
C9A N10A 1.318(6) . ?
C9A H9A 0.9500 . ?
N10A C13A 1.361(6) . ?
C11A C12A 1.411(6) . ?
C11A C13A 1.424(7) . ?
C13A C14A 1.423(6) . ?
N1B C2B 1.321(5) . ?
N1B C11B 1.359(5) . ?
C2B C3B 1.391(6) . ?
C2B H2B 0.9500 . ?
C3B C4B 1.376(6) . ?
C3B H3B 0.9500 . ?
C4B C12B 1.408(6) . ?
C4B H4B 0.9500 . ?
C5B C6B 1.345(6) . ?
C5B C12B 1.437(6) . ?
C5B H5B 0.9500 . ?
C6B C14B 1.431(6) . ?
C6B H6B 0.9500 . ?
C7B C8B 1.366(6) . ?
C7B C14B 1.406(6) . ?
C7B H7B 0.9500 . ?
C8B C9B 1.405(6) . ?
C8B H8B 0.9500 . ?
C9B N10B 1.313(5) . ?
C9B H9B 0.9500 . ?
N10B C13B 1.354(5) . ?
C11B C12B 1.409(6) . ?
C11B C13B 1.440(6) . ?
C13B C14B 1.405(5) . ?
O1 C2 1.322(5) . ?
O1 H1 0.8400 . ?
C2 O2 1.220(5) . ?
C2 C3 1.482(6) . ?
C3 C4 1.401(6) . ?
C3 C8 1.404(7) . ?
C4 C5 1.380(7) . ?
C4 Cl4 1.737(4) . ?
C5 C6 1.393(7) . ?
C5 H5 0.9500 . ?
C6 C7 1.391(8) . ?
C6 H6 0.9500 . ?
C7 C8 1.374(7) . ?
C7 H7 0.9500 . ?
C8 H8 0.9500 . ?
 
loop_
 _geom_angle_atom_site_label_1
 _geom_angle_atom_site_label_2
 _geom_angle_atom_site_label_3
 _geom_angle
 _geom_angle_site_symmetry_1
 _geom_angle_site_symmetry_3
 _geom_angle_publ_flag
N1A Mn1 N1B 152.42(12) . . ?
N1A Mn1 N10B 90.11(12) . . ?
N1B Mn1 N10B 72.12(12) . . ?
N1A Mn1 N10A 71.99(13) . . ?
N1B Mn1 N10A 85.34(12) . . ?
N10B Mn1 N10A 85.22(12) . . ?
N1A Mn1 Cl2 104.06(9) . . ?
N1B Mn1 Cl2 92.28(8) . . ?
N10B Mn1 Cl2 164.38(9) . . ?
N10A Mn1 Cl2 92.87(9) . . ?
N1A Mn1 Cl1 94.50(10) . . ?
N1B Mn1 Cl1 105.22(9) . . ?
N10B Mn1 Cl1 87.27(9) . . ?
N10A Mn1 Cl1 164.49(9) . . ?
Cl2 Mn1 Cl1 97.94(4) . . ?
C2A N1A C11A 118.6(4) . . ?
C2A N1A Mn1 124.4(3) . . ?
C11A N1A Mn1 117.0(3) . . ?
N1A C2A C3A 122.4(4) . . ?
N1A C2A H2A 118.8 . . ?
C3A C2A H2A 118.8 . . ?
C4A C3A C2A 118.8(5) . . ?
C4A C3A H3A 120.6 . . ?
C2A C3A H3A 120.6 . . ?
C3A C4A C12A 120.9(4) . . ?
C3A C4A H4A 119.5 . . ?
C12A C4A H4A 119.5 . . ?
C6A C5A C12A 121.6(4) . . ?
C6A C5A H5A 119.2 . . ?
C12A C5A H5A 119.2 . . ?
C5A C6A C14A 120.5(4) . . ?
C5A C6A H6A 119.7 . . ?
C14A C6A H6A 119.7 . . ?
C8A C7A C14A 119.1(4) . . ?
C8A C7A H7A 120.5 . . ?
C14A C7A H7A 120.5 . . ?
C7A C8A C9A 119.2(5) . . ?
C7A C8A H8A 120.4 . . ?
C9A C8A H8A 120.4 . . ?
N10A C9A C8A 123.3(4) . . ?
N10A C9A H9A 118.3 . . ?
C8A C9A H9A 118.3 . . ?
C9A N10A C13A 118.1(4) . . ?
C9A N10A Mn1 127.0(3) . . ?
C13A N10A Mn1 114.8(3) . . ?
N1A C11A C12A 122.5(4) . . ?
N1A C11A C13A 118.4(4) . . ?
C12A C11A C13A 119.1(4) . . ?
C4A C12A C11A 116.7(4) . . ?
C4A C12A C5A 124.1(4) . . ?
C11A C12A C5A 119.3(5) . . ?
N10A C13A C14A 121.8(4) . . ?
N10A C13A C11A 117.7(4) . . ?
C14A C13A C11A 120.5(4) . . ?
C7A C14A C13A 118.4(4) . . ?
C7A C14A C6A 122.5(4) . . ?
C13A C14A C6A 119.0(4) . . ?
C2B N1B C11B 118.2(4) . . ?
C2B N1B Mn1 125.5(3) . . ?
C11B N1B Mn1 116.2(3) . . ?
N1B C2B C3B 124.0(4) . . ?
N1B C2B H2B 118.0 . . ?
C3B C2B H2B 118.0 . . ?
C4B C3B C2B 118.5(4) . . ?
C4B C3B H3B 120.8 . . ?
C2B C3B H3B 120.8 . . ?
C3B C4B C12B 119.4(4) . . ?
C3B C4B H4B 120.3 . . ?
C12B C4B H4B 120.3 . . ?
C6B C5B C12B 121.2(4) . . ?
C6B C5B H5B 119.4 . . ?
C12B C5B H5B 119.4 . . ?
C5B C6B C14B 121.4(4) . . ?
C5B C6B H6B 119.3 . . ?
C14B C6B H6B 119.3 . . ?
C8B C7B C14B 118.9(4) . . ?
C8B C7B H7B 120.5 . . ?
C14B C7B H7B 120.5 . . ?
C7B C8B C9B 118.8(4) . . ?
C7B C8B H8B 120.6 . . ?
C9B C8B H8B 120.6 . . ?
N10B C9B C8B 123.8(4) . . ?
N10B C9B H9B 118.1 . . ?
C8B C9B H9B 118.1 . . ?
C9B N10B C13B 117.8(3) . . ?
C9B N10B Mn1 126.4(3) . . ?
C13B N10B Mn1 115.7(2) . . ?
N1B C11B C12B 122.1(4) . . ?
N1B C11B C13B 118.4(4) . . ?
C12B C11B C13B 119.5(4) . . ?
C4B C12B C11B 117.8(4) . . ?
C4B C12B C5B 123.3(4) . . ?
C11B C12B C5B 119.0(4) . . ?
N10B C13B C14B 122.6(4) . . ?
N10B C13B C11B 117.4(3) . . ?
C14B C13B C11B 119.9(4) . . ?
C13B C14B C7B 118.0(4) . . ?
C13B C14B C6B 119.0(4) . . ?
C7B C14B C6B 123.0(4) . . ?
C2 O1 H1 109.5 . . ?
O2 C2 O1 123.6(4) . . ?
O2 C2 C3 123.9(4) . . ?
O1 C2 C3 112.5(4) . . ?
C4 C3 C8 117.7(4) . . ?
C4 C3 C2 124.0(4) . . ?
C8 C3 C2 118.3(4) . . ?
C5 C4 C3 121.3(4) . . ?
C5 C4 Cl4 115.5(3) . . ?
C3 C4 Cl4 123.1(3) . . ?
C4 C5 C6 119.4(4) . . ?
C4 C5 H5 120.3 . . ?
C6 C5 H5 120.3 . . ?
C7 C6 C5 120.6(5) . . ?
C7 C6 H6 119.7 . . ?
C5 C6 H6 119.7 . . ?
C8 C7 C6 119.2(5) . . ?
C8 C7 H7 120.4 . . ?
C6 C7 H7 120.4 . . ?
C7 C8 C3 121.7(5) . . ?
C7 C8 H8 119.1 . . ?
C3 C8 H8 119.1 . . ?
 
loop_
 _geom_torsion_atom_site_label_1
 _geom_torsion_atom_site_label_2
 _geom_torsion_atom_site_label_3
 _geom_torsion_atom_site_label_4
 _geom_torsion
 _geom_torsion_site_symmetry_1
 _geom_torsion_site_symmetry_2
 _geom_torsion_site_symmetry_3
 _geom_torsion_site_symmetry_4
 _geom_torsion_publ_flag
C11A N1A C2A C3A 0.8(6) . . . . ?
Mn1 N1A C2A C3A -177.6(3) . . . . ?
N1A C2A C3A C4A -1.3(6) . . . . ?
C2A C3A C4A C12A 0.8(7) . . . . ?
C12A C5A C6A C14A 0.7(7) . . . . ?
C14A C7A C8A C9A 0.2(7) . . . . ?
C7A C8A C9A N10A 0.7(7) . . . . ?
C8A C9A N10A C13A -0.9(6) . . . . ?
C8A C9A N10A Mn1 177.4(3) . . . . ?
C2A N1A C11A C12A 0.1(6) . . . . ?
Mn1 N1A C11A C12A 178.7(3) . . . . ?
C2A N1A C11A C13A 179.1(3) . . . . ?
Mn1 N1A C11A C13A -2.3(4) . . . . ?
C3A C4A C12A C11A 0.1(6) . . . . ?
C3A C4A C12A C5A -179.1(4) . . . . ?
N1A C11A C12A C4A -0.6(6) . . . . ?
C13A C11A C12A C4A -179.6(4) . . . . ?
N1A C11A C12A C5A 178.7(4) . . . . ?
C13A C11A C12A C5A -0.3(6) . . . . ?
C6A C5A C12A C4A 179.3(4) . . . . ?
C6A C5A C12A C11A 0.2(6) . . . . ?
C9A N10A C13A C14A 0.1(6) . . . . ?
Mn1 N10A C13A C14A -178.4(3) . . . . ?
C9A N10A C13A C11A -179.1(4) . . . . ?
Mn1 N10A C13A C11A 2.4(4) . . . . ?
N1A C11A C13A N10A -0.2(5) . . . . ?
C12A C11A C13A N10A 178.8(3) . . . . ?
N1A C11A C13A C14A -179.4(3) . . . . ?
C12A C11A C13A C14A -0.3(6) . . . . ?
C8A C7A C14A C13A -0.9(6) . . . . ?
C8A C7A C14A C6A 177.8(4) . . . . ?
N10A C13A C14A C7A 0.7(6) . . . . ?
C11A C13A C14A C7A 179.9(4) . . . . ?
N10A C13A C14A C6A -178.0(4) . . . . ?
C11A C13A C14A C6A 1.2(6) . . . . ?
C5A C6A C14A C7A 180.0(4) . . . . ?
C5A C6A C14A C13A -1.4(6) . . . . ?
C11B N1B C2B C3B -1.0(6) . . . . ?
Mn1 N1B C2B C3B 176.5(3) . . . . ?
N1B C2B C3B C4B -0.8(6) . . . . ?
C2B C3B C4B C12B 1.7(6) . . . . ?
C12B C5B C6B C14B -0.9(7) . . . . ?
C14B C7B C8B C9B 0.8(6) . . . . ?
C7B C8B C9B N10B -0.2(6) . . . . ?
C8B C9B N10B C13B -0.3(6) . . . . ?
C8B C9B N10B Mn1 -175.5(3) . . . . ?
C2B N1B C11B C12B 1.9(6) . . . . ?
Mn1 N1B C11B C12B -175.8(3) . . . . ?
C2B N1B C11B C13B -179.6(3) . . . . ?
Mn1 N1B C11B C13B 2.7(5) . . . . ?
C3B C4B C12B C11B -0.8(6) . . . . ?
C3B C4B C12B C5B 179.5(4) . . . . ?
N1B C11B C12B C4B -1.1(6) . . . . ?
C13B C11B C12B C4B -179.5(4) . . . . ?
N1B C11B C12B C5B 178.6(4) . . . . ?
C13B C11B C12B C5B 0.2(6) . . . . ?
C6B C5B C12B C4B -179.9(4) . . . . ?
C6B C5B C12B C11B 0.5(6) . . . . ?
C9B N10B C13B C14B 0.2(6) . . . . ?
Mn1 N10B C13B C14B 175.9(3) . . . . ?
C9B N10B C13B C11B -179.6(4) . . . . ?
Mn1 N10B C13B C11B -3.9(4) . . . . ?
N1B C11B C13B N10B 0.8(5) . . . . ?
C12B C11B C13B N10B 179.3(3) . . . . ?
N1B C11B C13B C14B -178.9(3) . . . . ?
C12B C11B C13B C14B -0.4(6) . . . . ?
N10B C13B C14B C7B 0.4(6) . . . . ?
C11B C13B C14B C7B -179.8(3) . . . . ?
N10B C13B C14B C6B -179.7(4) . . . . ?
C11B C13B C14B C6B 0.1(6) . . . . ?
C8B C7B C14B C13B -0.9(6) . . . . ?
C8B C7B C14B C6B 179.2(4) . . . . ?
C5B C6B C14B C13B 0.6(6) . . . . ?
C5B C6B C14B C7B -179.5(4) . . . . ?
O2 C2 C3 C4 -14.6(6) . . . . ?
O1 C2 C3 C4 166.3(4) . . . . ?
O2 C2 C3 C8 165.4(4) . . . . ?
O1 C2 C3 C8 -13.6(5) . . . . ?
C8 C3 C4 C5 -0.6(6) . . . . ?
C2 C3 C4 C5 179.4(4) . . . . ?
C8 C3 C4 Cl4 176.5(3) . . . . ?
C2 C3 C4 Cl4 -3.5(6) . . . . ?
C3 C4 C5 C6 1.5(7) . . . . ?
Cl4 C4 C5 C6 -175.7(4) . . . . ?
C4 C5 C6 C7 -1.2(8) . . . . ?
C5 C6 C7 C8 0.0(9) . . . . ?
C6 C7 C8 C3 0.9(9) . . . . ?
C4 C3 C8 C7 -0.7(7) . . . . ?
C2 C3 C8 C7 179.3(5) . . . . ?
 
loop_
 _geom_hbond_atom_site_label_D 
 _geom_hbond_atom_site_label_H 
 _geom_hbond_atom_site_label_A 
 _geom_hbond_distance_DH 
 _geom_hbond_distance_HA 
 _geom_hbond_distance_DA 
 _geom_hbond_angle_DHA 
 _geom_hbond_site_symmetry_A 
 _geom_hbond_publ_flag
O1 H1 O2  0.84 1.80 2.635(4) 177.2 2_666 yes
 
_refine_diff_density_max    0.997
_refine_diff_density_min   -1.064
_refine_diff_density_rms    0.134

_shelx_res_file
;
TITL 1_a.res in P-1
    shelx.res
    created by SHELXL-2018/3 at 13:31:45 on 28-Dec-2023
CELL  1.54178  10.6563  10.9066  12.7900   89.159   66.391   86.483
ZERR     2.00   0.0018   0.0019   0.0021    0.009    0.007    0.008
LATT   1
SFAC  C    H    CL   MN   N    O
UNIT  62 42 6 2 8 4
MERG   2
EQIV $1 1-X,1-Y,1-Z
HTAB O1 O2_$1
MORE -1
FMAP   2
PLAN    5
SIZE     0.250   0.280   0.380
ACTA
BOND
BOND   $H
CONF
LIST   4
L.S.  10
TEMP  -173.15
WGHT    0.168000    1.614900
FVAR       0.22956
CL1   3    0.763085    1.053130    0.632963    11.00000    0.03297    0.03343 =
         0.03337    0.00471   -0.02368   -0.00975
MN1   4    0.735311    0.839841    0.696449    11.00000    0.02299    0.03155 =
         0.02830    0.00274   -0.01930   -0.00756
CL2   3    0.906060    0.826746    0.779365    11.00000    0.02583    0.04531 =
         0.03495    0.00312   -0.02358   -0.00786
N1A   5    0.848427    0.758646    0.519239    11.00000    0.02248    0.04188 =
         0.03286    0.00213   -0.02001   -0.00836
C2A   1    0.917048    0.822845    0.427859    11.00000    0.02709    0.04651 =
         0.03640    0.00418   -0.02333   -0.01186
AFIX  43
H2A   2    0.922882    0.908435    0.436329    11.00000   -1.20000
AFIX   0
C3A   1    0.981823    0.769038    0.318415    11.00000    0.03105    0.06572 =
         0.03134    0.00349   -0.01847   -0.01380
AFIX  43
H3A   2    1.028870    0.817763    0.253937    11.00000   -1.20000
AFIX   0
C4A   1    0.975868    0.645619    0.306529    11.00000    0.03077    0.06176 =
         0.04292   -0.01157   -0.02388   -0.00373
AFIX  43
H4A   2    1.020257    0.608176    0.233191    11.00000   -1.20000
AFIX   0
C5A   1    0.896391    0.443105    0.394927    11.00000    0.03314    0.05275 =
         0.05146   -0.01950   -0.02789    0.00388
AFIX  43
H5A   2    0.939538    0.401864    0.323291    11.00000   -1.20000
AFIX   0
C6A   1    0.827978    0.377670    0.488996    11.00000    0.03551    0.03873 =
         0.05810   -0.00929   -0.03378   -0.00008
AFIX  43
H6A   2    0.824559    0.291360    0.482785    11.00000   -1.20000
AFIX   0
C7A   1    0.689191    0.373586    0.696675    11.00000    0.03861    0.02926 =
         0.06566    0.00430   -0.03527   -0.00731
AFIX  43
H7A   2    0.680510    0.287658    0.693844    11.00000   -1.20000
AFIX   0
C8A   1    0.631347    0.436519    0.798366    11.00000    0.04256    0.03856 =
         0.04631    0.00818   -0.02506   -0.01073
AFIX  43
H8A   2    0.582253    0.394714    0.867039    11.00000   -1.20000
AFIX   0
C9A   1    0.645481    0.563979    0.799976    11.00000    0.03678    0.03638 =
         0.04578    0.00275   -0.02550   -0.00667
AFIX  43
H9A   2    0.605738    0.606333    0.871230    11.00000   -1.20000
AFIX   0
N10A  5    0.711059    0.627412    0.707609    11.00000    0.03025    0.03745 =
         0.03520    0.00437   -0.02415   -0.00715
C11A  1    0.841775    0.635053    0.506926    11.00000    0.02139    0.04515 =
         0.03870   -0.00233   -0.02391   -0.00513
C12A  1    0.905522    0.573709    0.400553    11.00000    0.02581    0.05135 =
         0.04099   -0.01095   -0.02504   -0.00322
C13A  1    0.769362    0.566038    0.605953    11.00000    0.02605    0.03444 =
         0.04279   -0.00312   -0.02685   -0.00407
C14A  1    0.760779    0.437140    0.597656    11.00000    0.02879    0.03902 =
         0.05050   -0.00403   -0.02979   -0.00495
N1B   5    0.557612    0.848776    0.872017    11.00000    0.02437    0.03249 =
         0.02975    0.00204   -0.02004   -0.00600
C2B   1    0.569726    0.846120    0.970872    11.00000    0.02729    0.03031 =
         0.03319    0.00587   -0.02125   -0.00690
AFIX  43
H2B   2    0.659318    0.835281    0.969921    11.00000   -1.20000
AFIX   0
C3B   1    0.459325    0.858226    1.076236    11.00000    0.03208    0.03852 =
         0.02942    0.00587   -0.02086   -0.00966
AFIX  43
H3B   2    0.473399    0.854596    1.145043    11.00000   -1.20000
AFIX   0
C4B   1    0.329215    0.875584    1.078565    11.00000    0.02800    0.03671 =
         0.03076    0.00207   -0.01916   -0.01073
AFIX  43
H4B   2    0.252126    0.886347    1.149260    11.00000   -1.20000
AFIX   0
C5B   1    0.179379    0.893922    0.969596    11.00000    0.02256    0.04081 =
         0.03807   -0.00252   -0.01862   -0.00708
AFIX  43
H5B   2    0.099310    0.904626    1.038188    11.00000   -1.20000
AFIX   0
C6B   1    0.167255    0.894633    0.868918    11.00000    0.02231    0.04054 =
         0.04387    0.00214   -0.02133   -0.00841
AFIX  43
H6B   2    0.078582    0.904709    0.867870    11.00000   -1.20000
AFIX   0
C7B   1    0.276369    0.881768    0.656472    11.00000    0.02784    0.03497 =
         0.04711    0.00332   -0.02776   -0.00861
AFIX  43
H7B   2    0.189756    0.891218    0.651428    11.00000   -1.20000
AFIX   0
C8B   1    0.394572    0.869146    0.560006    11.00000    0.03355    0.03641 =
         0.03354    0.00532   -0.02485   -0.00887
AFIX  43
H8B   2    0.391621    0.870675    0.486738    11.00000   -1.20000
AFIX   0
C9B   1    0.520596    0.853863    0.571047    11.00000    0.02708    0.03504 =
         0.03307    0.00250   -0.01979   -0.00795
AFIX  43
H9B   2    0.602083    0.844966    0.503390    11.00000   -1.20000
AFIX   0
N10B  5    0.532239    0.851169    0.669445    11.00000    0.02873    0.03098 =
         0.03054    0.00315   -0.02230   -0.00785
C11B  1    0.429520    0.862391    0.873059    11.00000    0.02640    0.03014 =
         0.03406    0.00261   -0.02140   -0.00916
C12B  1    0.311335    0.877252    0.975285    11.00000    0.02467    0.03288 =
         0.03363    0.00063   -0.01583   -0.01163
C13B  1    0.415729    0.864559    0.765515    11.00000    0.02749    0.02794 =
         0.03358    0.00270   -0.02077   -0.00819
C14B  1    0.285019    0.880543    0.763310    11.00000    0.02403    0.03192 =
         0.03595    0.00145   -0.02320   -0.00870
O1    6    0.558826    0.424264    0.361795    11.00000    0.03895    0.03833 =
         0.03369    0.00643   -0.02167   -0.01384
AFIX 147
H1    2    0.512343    0.415620    0.431894    11.00000   -1.50000
AFIX   0
C2    1    0.606315    0.535255    0.343466    11.00000    0.02764    0.03743 =
         0.03716    0.00415   -0.02311   -0.00739
O2    6    0.584479    0.610813    0.419076    11.00000    0.03580    0.03987 =
         0.03612    0.00362   -0.01990   -0.01315
C3    1    0.690791    0.556706    0.221261    11.00000    0.02793    0.04185 =
         0.03643    0.00325   -0.02327   -0.00735
C4    1    0.729654    0.672645    0.175318    11.00000    0.02927    0.04093 =
         0.03371    0.00518   -0.02354   -0.00645
CL4   3    0.675692    0.807873    0.255135    11.00000    0.05182    0.03553 =
         0.04093    0.00547   -0.02771   -0.01154
C5    1    0.809542    0.686646    0.060792    11.00000    0.03870    0.04456 =
         0.03762    0.01139   -0.02501   -0.00883
AFIX  43
H5    2    0.836867    0.765623    0.031267    11.00000   -1.20000
AFIX   0
C6    1    0.849750    0.583963   -0.011121    11.00000    0.04782    0.05451 =
         0.03326    0.00759   -0.01386   -0.00381
AFIX  43
H6    2    0.903239    0.593390   -0.090285    11.00000   -1.20000
AFIX   0
C7    1    0.812315    0.467743    0.031896    11.00000    0.06461    0.04672 =
         0.04260    0.00014   -0.01682   -0.00485
AFIX  43
H7    2    0.839965    0.397893   -0.017403    11.00000   -1.20000
AFIX   0
C8    1    0.734876    0.455103    0.146522    11.00000    0.05011    0.04050 =
         0.03780    0.00422   -0.01973   -0.00520
AFIX  43
H8    2    0.710539    0.375503    0.175952    11.00000   -1.20000
AFIX   0
HKLF    4


REM  1_a.res in P-1
REM wR2 = 0.2233, GooF = S = 1.060, Restrained GooF = 1.060 for all data
REM R1 = 0.0773 for 4543 Fo > 4sig(Fo) and 0.0812 for all 4832 data
REM 371 parameters refined using 0 restraints

END

WGHT      0.1680      1.6149

REM Highest difference peak  0.997,  deepest hole -1.064,  1-sigma level  0.134
Q1    1   0.7650  0.8483  0.7520  11.00000  0.05    1.00
Q2    1   0.6950  0.8304  0.6468  11.00000  0.05    0.96
Q3    1   0.6351  0.8329  0.7622  11.00000  0.05    0.94
Q4    1   0.6603  0.9345  0.6499  11.00000  0.05    0.88
Q5    1   0.8173  0.8509  0.6362  11.00000  0.05    0.85
;
_shelx_res_checksum   27200

_shelx_hkl_file
;
  -1   0   0  110.22    7.65
  -2   0   0  450.58   31.20
  -3   0   0    0.51    0.19
  -3   0   0    0.57    0.12
  -3   0   0    0.36    0.10
  -3   0   0    0.55    0.09
  -3   0   0    0.58    0.09
   3   0   0    0.71    0.11
   3   0   0    0.83    0.24
  -4   0   0   24.89    1.86
  -4   0   0   27.00    1.84
  -4   0   0   27.31    1.84
   4   0   0   25.76    1.85
  -5   0   0   46.49    3.52
  -5   0   0   46.47    3.36
  -5   0   0   44.17    3.38
  -5   0   0   46.63    3.36
   5   0   0   53.45    3.39
   5   0   0   51.61    3.37
  -6   0   0   92.60    7.12
   6   0   0  102.25    6.94
   6   0   0  103.93    6.96
  -7   0   0   54.52    3.85
  -7   0   0   54.35    4.14
  -7   0   0   55.34    3.87
  -7   0   0   49.69    3.82
  -7   0   0   55.81    3.89
   7   0   0   56.80    3.86
   7   0   0   55.44    3.87
   7   0   0   54.58    3.90
  -8   0   0    1.55    0.78
  -8   0   0    2.16    0.30
  -8   0   0    1.30    0.33
  -8   0   0    1.78    0.40
  -8   0   0    1.56    0.45
   8   0   0    2.25    0.98
   8   0   0    1.30    0.55
   8   0   0    1.64    0.46
  -9   0   0    0.43    0.18
  -9   0   0    0.29    0.35
  -9   0   0    0.39    0.43
  -9   0   0    0.33    0.60
  -9   0   0    0.22    0.31
   9   0   0    0.63    0.46
   9   0   0    0.03    0.55
   9   0   0    1.24    1.13
 -10   0   0    0.16    0.28
 -10   0   0    0.86    0.32
  10   0   0    0.10    0.54
 -11   0   0   13.55    1.04
 -11   0   0   14.20    1.03
  11   0   0   13.34    1.21
  11  -1   0    0.08    0.40
 -11   1   0   -0.02    0.17
 -11   1   0    0.23    0.17
 -11   1   0    0.03    0.17
  10  -1   0   11.83    1.29
 -10   1   0   12.73    0.99
 -10   1   0   13.10    0.96
   9  -1   0    3.52    0.73
   9  -1   0    5.40    1.26
   9  -1   0    3.94    0.66
  -9   1   0    4.43    0.58
  -9   1   0    3.42    0.86
  -9   1   0    4.91    0.46
   8  -1   0    1.22    0.45
   8  -1   0    0.53    0.58
   8  -1   0    0.78    0.47
   8  -1   0    0.95    0.93
  -8   1   0    0.61    0.29
  -8   1   0    0.88    0.37
  -8   1   0    1.00    0.22
  -8   1   0    0.82    0.42
  -8   1   0    0.77    0.75
   7  -1   0    5.70    1.02
   7  -1   0    4.13    0.63
   7  -1   0    4.90    0.62
   7  -1   0    4.29    0.54
  -7   1   0    4.29    0.46
  -7   1   0    4.36    0.43
  -7   1   0    4.69    0.60
  -7   1   0    5.19    0.56
  -7   1   0    4.52    0.59
  -7   1   0    4.97    0.51
  -7   1   0    6.18    1.14
   6  -1   0  109.63    7.57
  -6   1   0  109.72    7.74
  -6   1   0  106.98    7.58
   5  -1   0    0.16    0.53
   5  -1   0    0.36    0.25
   5  -1   0    0.26    0.22
  -5   1   0    0.58    0.36
  -5   1   0    0.61    0.24
  -5   1   0    0.45    0.19
  -4   1   0  278.48   19.39
   3  -1   0   11.26    0.79
   3  -1   0   11.36    0.78
  -3   1   0    9.75    0.87
  -3   1   0   11.92    0.81
  -3   1   0    9.98    0.79
  -2   1   0   32.99    2.34
  -1   1   0   76.19    5.29
   0   1   0   13.69    0.97
  -2  -1   0   37.20    2.68
  -3  -1   0   27.75    2.07
   3   1   0   29.01    1.98
  -4  -1   0    0.54    0.12
  -4  -1   0    0.55    0.12
  -4  -1   0    0.63    0.16
  -4  -1   0    0.53    0.26
  -4  -1   0    0.38    0.16
   4   1   0    1.03    0.17
   4   1   0    0.69    0.13
   4   1   0    0.37    0.27
  -5  -1   0   80.93    5.96
  -5  -1   0   80.57    6.07
   5   1   0   93.72    5.93
  -6  -1   0    1.91    0.32
  -6  -1   0    1.14    0.22
  -6  -1   0    1.58    0.48
  -6  -1   0    1.37    0.20
  -6  -1   0    1.19    0.19
   6   1   0    1.50    0.33
   6   1   0    1.50    0.28
   6   1   0    1.66    0.55
  -7  -1   0    4.66    0.45
  -7  -1   0    4.90    0.66
  -7  -1   0    4.48    0.60
  -7  -1   0    4.35    0.81
  -7  -1   0    4.09    0.50
   7   1   0    5.18    0.58
  -8  -1   0    1.10    0.39
  -8  -1   0    1.05    0.77
  -8  -1   0    1.13    0.47
  -8  -1   0    0.94    0.32
   8   1   0    0.96    0.47
   8   1   0    1.26    0.40
   8   1   0    1.72    1.04
   8   1   0    1.14    0.41
  -9  -1   0    0.17    0.42
  -9  -1   0    0.40    0.34
  -9  -1   0    0.71    0.38
  -9  -1   0    0.09    0.81
   9   1   0    0.01    0.50
   9   1   0    1.11    1.14
   9   1   0   -0.09    0.47
 -10  -1   0    0.11    0.31
  10   1   0    0.67    0.53
  10   1   0    1.73    0.90
 -11  -1   0    2.65    0.34
 -11  -1   0    2.24    0.36
  11   1   0    2.05    0.69
  11  -2   0    8.99    0.88
 -11   2   0    7.94    0.63
 -11   2   0    7.32    0.59
  10  -2   0    8.97    1.14
 -10   2   0   11.24    0.82
 -10   2   0   10.16    0.79
 -10   2   0   10.13    0.85
   9  -2   0    3.95    0.67
   9  -2   0    5.34    1.13
   9  -2   0    3.92    0.76
  -9   2   0    3.95    0.84
  -9   2   0    4.54    0.48
  -9   2   0    4.61    0.61
  -9   2   0    4.40    0.54
  -9   2   0    4.05    0.46
   8  -2   0   13.25    1.97
   8  -2   0   11.03    1.02
   8  -2   0    7.99    1.05
   8  -2   0    8.17    1.01
  -8   2   0    9.60    0.79
  -8   2   0   10.55    0.85
  -8   2   0    9.73    0.82
  -8   2   0   11.38    0.95
  -8   2   0    8.99    0.93
  -8   2   0   10.54    1.45
   7  -2   0   25.17    2.05
   7  -2   0   27.76    2.08
  -7   2   0   30.38    2.05
  -7   2   0   25.81    1.98
  -7   2   0   29.97    2.06
   6  -2   0   88.55    6.07
   6  -2   0   75.33    5.74
   6  -2   0   74.68    5.77
  -6   2   0   80.20    5.73
  -6   2   0   87.61    5.90
  -6   2   0   84.03    5.73
  -6   2   0   84.35    5.75
  -6   2   0   83.01    5.76
   5  -2   0  151.99   10.72
  -4   2   0   43.00    3.07
  -4   2   0   44.01    3.00
  -4   2   0   40.92    2.99
  -3   2   0    1.27    0.24
  -3   2   0    1.41    0.21
  -3   2   0    1.11    0.16
  -2   2   0   15.60    1.15
  -2   2   0   15.91    1.11
   0   2   0    2.08    0.26
  -4  -2   0   36.30    2.48
  -4  -2   0   34.41    2.41
   4   2   0   31.88    2.40
   4   2   0   34.55    2.39
  -5  -2   0    0.54    0.30
  -5  -2   0    0.72    0.18
  -5  -2   0    0.76    0.16
  -5  -2   0    0.67    0.24
  -5  -2   0    0.99    0.24
   5   2   0    0.93    0.21
   5   2   0    0.73    0.16
  -6  -2   0    7.70    0.69
  -6  -2   0    7.74    1.00
  -6  -2   0    6.09    0.68
  -6  -2   0    6.88    0.60
  -6  -2   0    6.19    0.60
   6   2   0    8.64    0.67
   6   2   0    7.93    0.62
  -7  -2   0    3.45    0.44
  -7  -2   0    2.75    0.31
  -7  -2   0    2.08    0.34
  -7  -2   0    2.33    0.31
  -7  -2   0    2.75    0.40
  -7  -2   0    2.54    0.41
  -7  -2   0    3.21    0.80
   7   2   0    2.53    0.38
  -8  -2   0   69.39    5.20
  -8  -2   0   74.62    5.65
  -8  -2   0   74.98    5.15
  -8  -2   0   73.27    5.22
   8   2   0   79.11    5.49
   8   2   0   72.45    5.23
  -9  -2   0    0.24    0.38
  -9  -2   0    0.24    0.46
  -9  -2   0    0.26    0.33
   9   2   0    0.02    0.48
 -10  -2   0    3.16    0.56
 -11  -2   0    2.34    0.35
  11   2   0    2.82    0.77
  11  -3   0    4.60    0.66
 -11   3   0    4.58    0.39
 -11   3   0    3.70    0.34
  10  -3   0    0.90    0.50
 -10   3   0    1.28    0.24
 -10   3   0    1.62    0.22
 -10   3   0    1.20    0.28
  -9   3   0    1.40    0.38
  -9   3   0    1.51    0.26
  -9   3   0    1.24    0.60
  -9   3   0    1.75    0.28
   8  -3   0    1.20    0.41
   8  -3   0    0.70    0.94
   8  -3   0    0.72    0.60
   8  -3   0    0.54    0.47
  -8   3   0    0.91    0.38
  -8   3   0    0.83    0.15
  -8   3   0    0.94    0.26
  -8   3   0    0.88    0.26
  -8   3   0    0.89    0.64
  -8   3   0    0.44    0.19
  -8   3   0    0.14    0.40
  -8   3   0    0.74    0.23
   7  -3   0    5.04    0.76
   7  -3   0    7.34    1.16
   7  -3   0    7.18    0.78
   7  -3   0    5.64    0.77
  -7   3   0    5.95    0.59
  -7   3   0    7.46    0.58
  -7   3   0    6.51    0.52
  -7   3   0    7.68    0.73
   6  -3   0   39.32    3.04
   6  -3   0   46.19    3.51
   6  -3   0   39.36    3.08
  -6   3   0   47.25    3.06
  -6   3   0   39.11    3.01
  -6   3   0   44.88    3.00
   5  -3   0   65.66    4.98
  -5   3   0   75.92    5.07
  -5   3   0   71.73    4.99
   4  -3   0    6.57    0.60
   4  -3   0    7.01    0.60
  -4   3   0    8.84    0.75
  -4   3   0    8.73    0.66
  -3   3   0    2.97    0.41
  -3   3   0    3.17    0.36
  -2   3   0   17.75    1.30
   1   3   0  999.15   69.10
  -2  -3   0    2.19    0.19
  -2  -3   0    1.91    0.18
  -2  -3   0    1.60    0.20
  -3  -3   0   46.11    3.50
  -4  -3   0    1.33    0.22
  -4  -3   0    0.60    0.25
  -4  -3   0    1.60    0.32
   4   3   0    1.01    0.15
   4   3   0    0.88    0.13
   5   3   0  132.27    9.13
   5   3   0  131.08    9.14
  -6  -3   0   58.54    4.15
  -6  -3   0   60.13    4.16
  -6  -3   0   63.88    4.18
  -6  -3   0   56.54    4.24
  -6  -3   0   59.77    4.14
   6   3   0   57.38    4.14
   6   3   0   57.81    4.15
  -7  -3   0    0.41    0.21
  -7  -3   0    0.58    0.34
  -7  -3   0    0.26    0.21
  -7  -3   0    0.33    0.22
  -7  -3   0    0.28    0.24
  -7  -3   0    0.42    0.28
   7   3   0    0.64    0.28
   7   3   0    0.15    0.27
  -8  -3   0    0.62    0.24
  -8  -3   0    0.75    0.29
  -8  -3   0    0.48    0.24
  -8  -3   0    0.81    0.41
  -8  -3   0    0.31    0.50
  -8  -3   0    0.70    0.24
   8   3   0    1.38    0.79
   8   3   0    0.91    0.38
  -9  -3   0    0.63    0.49
  -9  -3   0    2.06    0.47
  -9  -3   0    1.16    0.34
   9   3   0    2.67    0.96
 -10  -3   0   -0.01    0.31
  10   3   0    0.38    0.90
  11  -4   0    0.26    0.27
  10  -4   0    0.09    0.40
 -10   4   0   -0.06    0.20
 -10   4   0    0.11    0.14
 -10   4   0    0.46    0.17
 -10   4   0   -0.05    0.16
  -9   4   0    5.37    0.66
  -9   4   0    4.81    0.42
  -9   4   0    4.22    0.47
  -9   4   0    5.41    0.48
   8  -4   0   34.04    3.14
   8  -4   0   37.12    2.54
  -8   4   0   32.83    2.40
  -8   4   0   36.28    2.44
  -8   4   0   38.08    2.55
  -8   4   0   30.64    2.42
  -8   4   0   30.12    2.40
   7  -4   0    5.07    0.64
   7  -4   0    6.69    1.25
   7  -4   0    6.05    0.74
  -7   4   0    5.52    0.51
  -7   4   0    6.07    0.69
  -7   4   0    4.75    0.51
  -7   4   0    5.93    0.53
  -7   4   0    5.53    0.46
   6  -4   0   40.70    3.21
   6  -4   0   36.49    2.63
   6  -4   0   34.10    2.67
  -6   4   0   35.66    2.56
  -5   4   0    1.05    0.27
  -5   4   0    0.95    0.18
  -5   4   0    0.81    0.13
  -5   4   0    1.35    0.39
  -4   4   0  132.84    9.27
  -3   4   0    6.96    0.66
  -2   4   0    6.61    0.65
   1   4   0 1000.00   69.17
  -2  -4   0    2.63    0.23
  -2  -4   0    2.08    0.24
  -3  -4   0    3.74    0.34
  -3  -4   0    4.18    0.49
  -3  -4   0    3.38    0.36
  -3  -4   0    3.60    0.34
  -4  -4   0   34.29    2.44
  -4  -4   0   34.85    2.43
  -4  -4   0   34.35    2.43
  -4  -4   0   34.07    2.56
  -5  -4   0   75.07    5.14
  -5  -4   0   70.46    5.25
  -5  -4   0   74.45    5.13
  -6  -4   0    1.42    0.28
  -6  -4   0    2.50    0.39
  -6  -4   0    1.39    0.39
  -6  -4   0    2.00    0.30
  -6  -4   0    1.46    0.26
  -7  -4   0  141.91    9.35
  -7  -4   0  128.91    9.36
  -7  -4   0  142.28    9.39
  -7  -4   0  134.58    9.37
   7   4   0  124.45    9.51
  -8  -4   0    0.22    0.27
  -8  -4   0    0.28    0.24
  -8  -4   0    0.56    0.36
  -8  -4   0    0.12    0.24
  -8  -4   0    0.20    0.24
  -8  -4   0    0.06    0.51
   8   4   0    0.80    0.79
  -9  -4   0    4.68    0.58
  -9  -4   0    2.96    0.69
  -9  -4   0    4.11    0.52
 -10  -4   0    0.01    0.28
  10   4   0   -0.24    0.85
  11   4   0   43.30    2.94
  11   4   0   40.84    3.19
  10  -5   0    3.15    0.43
 -10   5   0    3.35    0.33
 -10   5   0    3.40    0.31
 -10   5   0    2.43    0.37
  -9   5   0    0.33    0.20
  -9   5   0    0.58    0.33
  -9   5   0    0.63    0.18
  -9   5   0    0.59    0.13
  -9   5   0    0.33    0.19
   8  -5   0    6.90    1.21
   8  -5   0    5.39    0.78
   8  -5   0    5.89    0.71
   8  -5   0    7.21    0.83
  -8   5   0    6.38    0.60
  -8   5   0    6.24    0.52
  -8   5   0    7.37    0.79
  -8   5   0    5.58    0.57
  -8   5   0    6.07    0.59
   7  -5   0   23.52    1.88
   7  -5   0   24.74    2.61
  -7   5   0   24.95    1.79
  -7   5   0   27.00    1.81
  -7   5   0   24.12    1.76
  -7   5   0   23.78    1.76
   6  -5   0    0.26    0.94
  -6   5   0    1.45    0.42
  -6   5   0    1.97    0.42
  -6   5   0    1.50    0.24
  -6   5   0    1.60    0.25
  -6   5   0    1.82    0.27
  -6   5   0    1.53    0.27
  -5   5   0  279.25   18.65
  -5   5   0  288.35   18.72
  -5   5   0  239.80   18.61
  -4   5   0   14.11    1.20
  -4   5   0   13.28    1.17
  -3   5   0  136.28    9.55
   1  -5   0  106.84    7.48
   1   5   0  175.70   12.21
   2   5   0   29.98    2.19
  -3  -5   0    5.83    0.54
  -3  -5   0    6.58    0.52
  -3  -5   0    6.55    0.76
  -3  -5   0    6.53    0.53
  -4  -5   0   12.05    1.08
  -4  -5   0   10.86    0.87
  -4  -5   0   11.11    0.87
  -4  -5   0   11.45    0.89
  -5  -5   0   76.71    5.33
  -5  -5   0   75.90    5.33
  -5  -5   0   79.85    5.34
  -5  -5   0   79.22    5.49
   5   5   0   69.66    5.41
  -6  -5   0   35.09    2.53
  -6  -5   0   35.52    2.70
  -6  -5   0   35.51    2.52
  -6  -5   0   34.66    2.53
  -6  -5   0   37.46    2.56
   6   5   0   33.62    2.68
  -7  -5   0   51.25    3.52
  -7  -5   0   48.01    3.67
  -7  -5   0   49.78    3.53
  -7  -5   0   47.84    3.55
  -7  -5   0   47.75    3.53
   7   5   0   53.59    3.73
  -8  -5   0    6.37    1.01
  -8  -5   0    7.26    0.70
  -8  -5   0    7.61    0.72
  -8  -5   0    7.47    0.81
  -8  -5   0    7.12    0.71
   8   5   0    7.24    0.88
  -9  -5   0   41.70    2.80
  -9  -5   0   36.93    2.83
  10   5   0   12.65    0.91
  10   5   0   10.41    1.52
  11   5   0    5.05    0.91
  10  -6   0    0.22    0.24
 -10   6   0    0.17    0.11
 -10   6   0    0.33    0.11
 -10   6   0    0.20    0.16
  -9   6   0   10.22    0.75
  -9   6   0   11.68    0.82
  -9   6   0    9.93    0.88
  -9   6   0    9.10    0.77
  -9   6   0    9.74    0.78
   8  -6   0    4.63    0.70
  -8   6   0    3.82    0.43
  -8   6   0    3.59    0.43
  -8   6   0    4.14    0.47
  -8   6   0    3.53    0.37
  -8   6   0    4.68    0.41
  -8   6   0    3.88    0.66
   7  -6   0   11.39    1.09
   7  -6   0   12.06    1.91
  -7   6   0   14.38    0.98
  -7   6   0   11.48    0.98
  -7   6   0   11.31    0.99
  -7   6   0   14.86    1.17
  -7   6   0   13.48    0.97
  -7   6   0   12.71    0.95
   6  -6   0   34.08    3.41
  -6   6   0   42.71    2.84
  -6   6   0   39.90    2.84
  -6   6   0   44.38    2.84
  -6   6   0   44.53    2.95
  -6   6   0   38.17    2.81
  -6   6   0   38.71    2.80
  -6   6   0   35.45    2.80
  -5   6   0   88.82    5.68
  -5   6   0   72.73    5.64
  -5   6   0   81.66    5.65
  -5   6   0   80.25    5.68
  -5   6   0   82.89    5.75
  -4   6   0   45.87    3.29
  -4   6   0   46.32    3.21
  -4   6   0   48.92    3.24
  -4   6   0   42.25    3.20
  -3   6   0   68.22    4.57
  -3   6   0   68.10    4.56
  -3   6   0   64.32    4.53
  -3   6   0   66.76    4.47
  -3   6   0   58.89    4.44
  -3   6   0   57.67    4.45
  -2   6   0    5.62    0.67
   1  -6   0    9.88    0.86
   0  -6   0   55.88    4.03
  -1  -6   0  121.03    8.53
  -2  -6   0   14.24    1.24
  -3  -6   0    8.65    0.92
  -3  -6   0    8.69    0.69
  -4  -6   0    1.08    0.26
  -4  -6   0    0.93    0.22
  -4  -6   0    0.96    0.24
  -4  -6   0    0.87    0.38
   4   6   0    1.04    0.37
   4   6   0    0.91    0.40
  -5  -6   0   10.36    0.88
  -5  -6   0   10.07    0.88
  -5  -6   0   11.32    0.86
  -5  -6   0   10.20    1.11
  -5  -6   0   11.47    0.91
   5   6   0   11.07    1.10
   5   6   0   10.68    1.11
  -6  -6   0    4.64    0.58
  -6  -6   0    4.83    0.59
  -6  -6   0    4.67    0.56
  -6  -6   0    4.94    0.56
  -6  -6   0    5.82    0.78
   6   6   0    5.91    0.96
   6   6   0    3.25    0.72
  -7  -6   0    3.61    0.62
  -7  -6   0    3.83    0.56
  -7  -6   0    4.62    0.58
  -7  -6   0    3.50    0.45
  -7  -6   0    3.96    0.54
   7   6   0    4.73    0.77
  -8  -6   0   14.68    1.11
  -8  -6   0   13.70    1.10
  -8  -6   0   12.31    1.21
   8   6   0   13.14    1.25
   9   6   0   12.55    0.94
   9   6   0   12.02    1.50
   9  -7   0    3.46    0.45
  -9   7   0    4.20    0.32
  -9   7   0    3.80    0.36
  -9   7   0    3.76    0.47
  -9   7   0    3.97    0.34
   8  -7   0    0.11    0.33
  -8   7   0    0.30    0.12
  -8   7   0    0.46    0.33
  -8   7   0    0.42    0.19
  -8   7   0    0.21    0.17
  -8   7   0    0.29    0.16
  -8   7   0    0.61    0.15
  -7   7   0    4.87    0.42
  -7   7   0    3.88    0.46
  -7   7   0    3.73    0.70
  -7   7   0    4.18    0.44
  -7   7   0    5.07    0.47
  -7   7   0    3.96    0.41
  -6   7   0   73.10    5.11
  -6   7   0   73.33    5.09
  -6   7   0   71.13    5.20
  -6   7   0   71.02    5.12
  -6   7   0   76.50    5.08
  -5   7   0    3.83    0.40
  -5   7   0    4.49    0.50
  -5   7   0    3.87    0.43
  -5   7   0    3.70    0.46
  -5   7   0    2.72    0.52
  -5   7   0    3.38    0.42
  -5   7   0    3.81    0.39
  -4   7   0   38.88    3.07
  -4   7   0   42.98    2.98
  -4   7   0   45.18    2.99
  -4   7   0   46.94    3.01
  -4   7   0   37.97    2.96
  -3   7   0    1.30    0.20
  -3   7   0    1.88    0.46
  -3   7   0    1.36    0.21
  -3   7   0    1.76    0.44
  -3   7   0    1.24    0.92
  -3   7   0    1.36    0.42
  -3   7   0    0.72    0.33
  -3   7   0    1.40    0.22
  -3   7   0    1.59    0.23
  -3   7   0    1.52    0.22
  -3   7   0    1.37    0.24
  -3   7   0    1.84    0.30
  -2   7   0    2.10    0.86
  -2   7   0    0.89    0.20
  -2   7   0    1.35    0.42
  -2   7   0    1.40    0.40
  -2   7   0    0.28    0.33
  -2   7   0    0.72    0.19
  -2   7   0    0.91    0.18
  -2   7   0    0.94    0.17
  -2   7   0    0.51    0.28
  -2   7   0    0.60    0.15
  -2   7   0    0.65    0.15
   1  -7   0    3.18    0.43
  -1   7   0    2.81    0.37
  -1   7   0    4.00    0.89
  -1   7   0    2.56    0.35
  -1   7   0    3.12    0.43
  -1   7   0    2.23    0.27
   0  -7   0  178.29   12.38
   0   7   0  174.91   12.26
   1   7   0  456.60   31.89
   1   7   0  456.97   31.84
   1   7   0  463.70   31.84
  -2  -7   0   46.42    3.27
   2   7   0   44.85    3.19
   2   7   0   47.62    3.25
   2   7   0   38.83    3.06
   2   7   0   42.92    3.78
  -3  -7   0    9.26    0.96
   3   7   0    9.03    0.77
   3   7   0    9.73    0.91
   3   7   0    8.66    0.70
   3   7   0    8.42    0.90
   3   7   0    7.98    1.04
   3   7   0    8.34    0.65
  -4  -7   0   38.01    2.74
  -4  -7   0   36.39    2.54
  -4  -7   0   31.69    2.52
  -4  -7   0   36.50    2.54
   4   7   0   37.75    2.84
   4   7   0   34.26    2.51
   4   7   0   35.36    2.51
   4   7   0   37.73    2.74
  -5  -7   0    7.18    0.67
  -5  -7   0    6.87    0.62
  -5  -7   0    6.71    0.92
  -5  -7   0    7.06    0.64
   5   7   0    6.07    0.93
   5   7   0    5.66    0.81
   5   7   0    7.14    0.90
   5   7   0    6.67    0.55
  -6  -7   0    2.44    0.36
  -6  -7   0    2.74    0.58
  -6  -7   0    2.78    0.39
  -6  -7   0    2.93    0.46
   6   7   0    1.67    0.43
   6   7   0    1.79    0.63
   6   7   0    2.25    0.33
   6   7   0    2.95    0.59
  -7  -7   0    1.13    0.33
  -7  -7   0    1.46    0.47
  -7  -7   0    1.31    0.29
  -7  -7   0    1.52    0.32
   7   7   0    1.90    0.60
   7   7   0    1.78    0.25
   7   7   0    1.00    0.41
  -8  -7   0    0.47    0.28
   8   7   0    0.48    0.24
   8   7   0    0.45    0.20
   8   7   0    0.36    0.39
   8   7   0    0.92    0.60
   9   7   0   25.44    1.75
   9   7   0   23.66    2.02
  10   7   0    9.20    0.68
  10   7   0    9.51    1.02
  -8   8   0    5.87    0.64
  -8   8   0    5.52    0.47
  -8   8   0    6.58    0.48
  -8   8   0    6.07    0.50
  -7   8   0    9.66    0.97
  -7   8   0   11.12    0.81
  -7   8   0   10.77    0.81
  -7   8   0   10.75    0.82
  -6   8   0    0.45    0.20
  -6   8   0    0.50    0.15
  -6   8   0    0.70    0.17
  -6   8   0    0.68    0.21
  -6   8   0    0.76    0.43
  -6   8   0    0.77    0.18
  -6   8   0    0.52    0.18
  -5   8   0   28.99    2.04
  -5   8   0   24.74    2.16
  -5   8   0   30.26    2.05
  -5   8   0   31.87    2.06
  -5   8   0   28.43    2.05
  -5   8   0   27.29    2.04
  -5   8   0   28.39    2.05
  -4   8   0    0.07    0.15
  -4   8   0    0.30    0.17
  -4   8   0    0.33    0.27
  -4   8   0    0.17    0.16
  -4   8   0    0.22    0.19
  -4   8   0    0.01    0.35
  -4   8   0    0.10    0.22
  -4   8   0    0.12    0.18
  -4   8   0    0.20    0.19
  -3   8   0    7.69    0.65
  -3   8   0    7.50    0.62
  -3   8   0    7.80    0.67
  -3   8   0    7.89    0.71
  -3   8   0    6.73    0.61
  -3   8   0    7.54    0.61
  -3   8   0    6.91    0.79
  -3   8   0    7.26    0.65
  -2   8   0   47.30    3.24
  -2   8   0   47.75    3.26
  -2   8   0   43.92    3.26
  -2   8   0   48.51    3.31
  -2   8   0   42.89    3.49
  -2   8   0   49.20    3.42
  -2   8   0   46.56    3.26
  -2   8   0   49.55    3.26
  -2   8   0   43.99    3.33
  -2   8   0   43.82    3.25
   1  -8   0    4.20    0.57
  -1   8   0    4.37    0.51
  -1   8   0    4.67    0.50
  -1   8   0    4.27    0.47
  -1   8   0    4.11    0.54
  -1   8   0    4.28    0.40
  -1   8   0    5.09    0.43
  -1   8   0    5.57    0.76
  -1   8   0    5.54    0.94
   0  -8   0   16.90    1.46
   0   8   0   15.45    1.28
   0   8   0   15.75    1.36
   0   8   0   19.71    1.38
   0   8   0   18.76    1.48
   0   8   0   15.12    1.24
   0   8   0   19.02    1.27
   0   8   0   16.32    1.31
   0   8   0   19.77    1.53
   0   8   0   20.83    1.99
   0   8   0   18.41    1.53
  -1  -8   0   89.65    5.89
   1   8   0   90.53    5.82
   1   8   0   75.08    5.67
   1   8   0   89.31    5.87
   1   8   0   73.65    5.67
   1   8   0   74.63    5.68
  -2  -8   0    6.97    0.83
   2   8   0    7.05    0.79
   2   8   0    7.83    0.84
   2   8   0    5.47    0.56
   2   8   0    5.68    0.93
   2   8   0    6.47    0.50
   2   8   0    5.77    0.84
  -3  -8   0    0.61    0.43
   3   8   0    0.84    0.16
   3   8   0    0.64    0.18
   3   8   0    0.99    0.55
   3   8   0    0.82    0.40
   3   8   0    0.69    0.38
  -4  -8   0    3.57    0.44
  -4  -8   0    4.70    0.48
  -4  -8   0    3.76    0.64
  -4  -8   0    4.53    0.50
   4   8   0    3.62    0.35
   4   8   0    3.13    0.63
   4   8   0    4.27    0.44
   4   8   0    2.87    0.52
   4   8   0    4.19    0.79
  -5  -8   0    0.59    0.29
  -5  -8   0    0.63    0.26
  -5  -8   0    0.89    0.25
  -5  -8   0    0.31    0.42
   5   8   0    0.21    0.37
   5   8   0    0.35    0.50
   5   8   0    0.40    0.40
  -6  -8   0   72.03    5.16
  -6  -8   0   71.26    5.17
  -6  -8   0   71.84    5.17
   6   8   0   79.53    5.22
   6   8   0   78.23    5.13
   6   8   0   68.96    5.16
  -7  -8   0   80.13    6.12
   7   8   0   89.40    6.13
   7   8   0   79.67    6.21
   7   8   0   94.56    6.09
   7   8   0   94.20    6.19
   8   8   0   11.88    0.87
   8   8   0   13.24    1.16
   8   8   0    9.69    1.18
   9   8   0   26.76    1.89
   9   8   0   27.17    2.03
  -8   9   0    0.41    0.19
  -8   9   0    0.51    0.12
  -8   9   0    0.67    0.13
  -8   9   0    0.51    0.09
  -7   9   0    0.73    0.32
  -7   9   0    0.15    0.11
  -7   9   0    0.45    0.15
  -7   9   0    0.24    0.13
  -7   9   0    0.23    0.15
  -6   9   0   18.04    1.24
  -6   9   0   16.00    1.37
  -6   9   0   16.79    1.24
  -5   9   0   13.85    1.17
  -5   9   0   17.51    1.18
  -5   9   0   14.50    1.17
  -5   9   0   17.96    1.19
  -5   9   0   14.37    1.33
  -5   9   0   17.25    1.19
  -4   9   0   34.48    2.54
  -4   9   0   40.15    2.60
  -4   9   0   31.50    2.66
  -4   9   0   40.62    2.57
  -4   9   0   35.11    2.56
  -4   9   0   35.17    2.56
  -4   9   0   36.43    2.55
  -3   9   0    3.64    0.38
  -3   9   0    2.62    0.46
  -3   9   0    3.58    0.49
  -3   9   0    3.09    0.55
  -3   9   0    4.18    0.55
  -3   9   0    3.10    0.51
  -3   9   0    2.61    0.38
  -3   9   0    3.52    0.43
  -3   9   0    3.09    0.38
  -2   9   0    4.01    0.53
  -2   9   0    3.38    0.41
  -2   9   0    3.59    0.61
  -2   9   0    2.95    0.48
  -2   9   0    3.65    0.48
  -2   9   0    4.21    0.39
  -2   9   0    3.57    0.50
  -2   9   0    3.01    0.47
  -1   9   0   12.28    1.04
  -1   9   0   12.53    1.02
  -1   9   0   14.75    1.37
  -1   9   0   15.97    1.41
  -1   9   0   13.22    1.12
  -1   9   0   15.19    1.95
  -1   9   0   12.80    0.99
  -1   9   0   15.28    1.31
  -1   9   0   13.35    1.07
   0  -9   0   19.09    1.55
   0   9   0   17.22    1.37
   0   9   0   22.16    2.18
   0   9   0   19.33    1.65
   0   9   0   21.59    1.61
   0   9   0   21.21    1.68
   0   9   0   17.34    1.33
   0   9   0   18.50    1.68
   0   9   0   16.38    1.34
  -1  -9   0   12.61    1.33
  -1  -9   0   14.64    1.29
   1   9   0   13.73    1.43
   1   9   0   16.16    1.13
   1   9   0   14.86    1.15
   1   9   0   15.84    1.10
   1   9   0   17.81    1.88
  -2  -9   0    0.97    0.41
   2   9   0    0.90    0.45
   2   9   0    0.79    0.47
   2   9   0    1.07    0.22
   2   9   0    1.04    0.72
  -3  -9   0    2.88    0.58
   3   9   0    1.95    0.59
   3   9   0    2.45    0.28
   3   9   0    1.84    0.73
  -4  -9   0    0.68    0.22
  -4  -9   0    0.43    0.41
  -4  -9   0    1.02    0.25
   4   9   0    0.75    0.18
   4   9   0    0.43    0.43
   4   9   0    1.07    0.57
   4   9   0    0.78    0.21
   4   9   0    0.88    0.65
  -5  -9   0    0.28    0.27
  -5  -9   0    0.40    0.24
  -5  -9   0    0.03    0.39
  -5  -9   0    0.17    0.23
   5   9   0   -0.21    0.54
   5   9   0    0.23    0.16
   5   9   0    0.24    0.44
  -6  -9   0   43.65    3.28
   6   9   0   50.26    3.29
   6   9   0   45.39    3.41
  -7  -9   0    0.82    0.28
   7   9   0    0.53    0.42
   7   9   0    0.61    0.21
   7   9   0    0.87    0.18
   8   9   0   25.47    1.80
   9   9   0   29.55    2.06
  -7  10   0    0.65    0.11
  -7  10   0    0.90    0.11
  -7  10   0    0.88    0.22
  -6  10   0   36.72    2.77
  -6  10   0   41.62    2.71
  -6  10   0   37.77    2.71
  -5  10   0    5.36    0.71
  -5  10   0    7.26    0.58
  -5  10   0    7.11    0.57
  -4  10   0   51.83    3.37
  -4  10   0   44.10    3.35
  -4  10   0   44.73    3.36
  -4  10   0   51.44    3.35
  -3  10   0    0.60    0.17
  -3  10   0    1.09    0.43
  -3  10   0    0.69    0.24
  -3  10   0    1.38    0.28
  -3  10   0    0.91    0.18
  -3  10   0    1.23    0.22
  -3  10   0    0.93    0.37
  -2  10   0   23.75    1.73
  -2  10   0   25.96    1.73
  -2  10   0   26.24    1.72
  -2  10   0   22.13    1.71
  -2  10   0   22.63    1.79
  -2  10   0   23.64    1.70
  -2  10   0   22.13    1.92
  -1  10   0    7.69    1.07
  -1  10   0    8.60    0.63
  -1  10   0    7.33    0.67
  -1  10   0    7.60    0.72
  -1  10   0    6.84    0.73
  -1  10   0    9.03    0.67
   0  10   0   67.62    4.73
   0  10   0   73.21    4.92
   0  10   0   68.42    4.88
   0  10   0   60.08    4.95
   0  10   0   70.63    5.29
   0  10   0   67.50    4.74
   0  10   0   66.49    4.72
   0  10   0   68.76    4.74
  -1 -10   0   55.96    4.19
   1  10   0   56.76    4.01
   1  10   0   58.71    3.99
  -2 -10   0    3.92    0.62
   2  10   0    4.22    0.52
   2  10   0    4.12    0.62
   2  10   0    4.17    0.95
   2  10   0    3.46    0.74
   2  10   0    6.44    1.05
  -3 -10   0   23.10    1.84
  -3 -10   0   23.78    1.91
   3  10   0   23.32    1.75
   3  10   0   24.10    1.71
   3  10   0   24.52    1.68
   3  10   0   22.90    1.95
   4  10   0    8.98    1.12
   4  10   0    7.57    0.82
   4  10   0    7.11    1.08
   4  10   0    9.70    0.67
  -5 -10   0    3.88    0.47
   5  10   0    2.61    0.65
   5  10   0    3.59    0.59
   6  10   0    7.18    0.55
   6  10   0    6.81    0.72
   6  10   0    6.89    0.98
   7  10   0   14.55    1.04
   7  10   0   10.63    1.19
   7  10   0   12.73    0.92
   8  10   0   15.51    1.11
   8  10   0   15.79    1.30
  -5  11   0   11.90    1.01
  -5  11   0   14.32    0.95
  -4  11   0   10.65    0.90
  -4  11   0   13.21    0.90
  -4  11   0   13.00    0.92
  -3  11   0   13.27    1.00
  -3  11   0   13.09    0.99
  -3  11   0   14.63    1.00
  -3  11   0   13.72    1.04
  -2  11   0    9.41    0.66
  -2  11   0    8.61    0.66
  -2  11   0    7.42    0.77
  -2  11   0    7.87    0.73
  -2  11   0    8.88    0.94
  -1  11   0    2.41    0.31
  -1  11   0    2.92    0.45
  -1  11   0    1.88    0.26
   0  11   0   -0.22    0.41
   0  11   0    0.20    0.16
   0  11   0   -0.11    0.20
   0  11   0    0.62    0.16
   0  11   0    0.27    0.17
   0  11   0   -0.21    0.47
   1  11   0   66.60    4.63
   1  11   0   61.94    4.47
   1  11   0   63.53    4.47
   1  11   0   64.12    4.46
   2  11   0   -0.35    0.47
   2  11   0    0.38    0.51
   2  11   0    0.35    0.16
   3  11   0    1.59    0.24
   3  11   0    1.11    0.52
   3  11   0    1.82    0.26
   3  11   0    1.46    0.52
   4  11   0    2.80    0.55
   4  11   0    1.99    0.24
   5  11   0    1.95    0.23
  -6 -11   0    0.64    0.21
   6  11   0    1.13    0.41
   6  11   0    0.86    0.17
   7  11   0    2.83    0.25
   7  11   0    2.25    0.41
  -4  12   0    3.51    0.29
  -3  12   0    2.75    0.28
  -3  12   0    3.23    0.33
  -2  12   0    4.07    0.37
  -2  12   0    4.24    0.35
  -1  12   0    7.13    0.64
  -1  12   0    8.74    0.59
  -1  12   0    7.14    0.82
   0  12   0    2.11    0.27
   0  12   0    2.32    0.37
   1  12   0    1.70    0.23
   1  12   0    1.74    0.45
   2  12   0    3.35    0.56
   2  12   0    4.84    0.37
   2  12   0    4.60    0.47
   2  12   0    3.77    0.45
   3  12   0    3.45    0.54
   3  12   0    3.75    0.32
   3  12   0    3.44    0.44
   4  12   0    6.94    0.54
   4  12   0    7.73    0.62
   4  12   0    6.76    0.86
   5  12   0    0.12    0.10
   5  12   0    0.11    0.32
   0  13   0    0.46    0.11
   0  13   0    0.29    0.12
   0  13   0    0.19    0.22
   1  13   0   27.48    1.91
   1  13   0   27.24    1.99
   2  13   0    1.74    0.19
   2  13   0    1.32    0.29
   1  13  -1   33.77    2.33
   1  13  -1   33.20    2.40
   0  13  -1    2.57    0.44
   0  13  -1    3.32    0.27
   5  12  -1   12.51    0.89
   4  12  -1    0.11    0.33
   4  12  -1    0.12    0.11
   4  12  -1   -0.01    0.12
   3  12  -1   12.07    0.87
   3  12  -1   11.81    1.13
   3  12  -1   12.41    0.93
   2  12  -1    0.49    0.17
   2  12  -1    0.60    0.15
   2  12  -1    0.24    0.14
   2  12  -1    0.44    0.39
   1  12  -1   45.06    2.98
   1  12  -1   43.28    2.97
   1  12  -1   39.10    2.98
   1  12  -1   42.97    3.11
   0  12  -1    0.92    0.15
   0  12  -1    0.78    0.20
   0  12  -1    0.63    0.38
  -1  12  -1    2.58    0.29
  -2  12  -1    0.82    0.14
  -2  12  -1    0.63    0.18
  -3  12  -1    3.83    0.37
  -3  12  -1    3.14    0.31
  -4  12  -1    1.51    0.19
   6  11  -1    0.34    0.37
   6  11  -1    0.01    0.16
   6  11  -1    0.08    0.11
  -6 -11   1    0.22    0.18
   5  11  -1    9.98    1.06
   5  11  -1    9.56    0.71
   5  11  -1    9.32    0.82
   4  11  -1    0.61    0.49
   4  11  -1    0.52    0.16
   4  11  -1    0.67    0.46
   3  11  -1    1.59    0.22
   3  11  -1    2.03    0.54
   2  11  -1    0.50    0.47
   2  11  -1    0.40    0.47
   2  11  -1    0.85    0.22
   1  11  -1    5.05    0.58
   1  11  -1    6.20    0.96
   1  11  -1    5.97    0.49
   0  11  -1   18.20    1.40
   0  11  -1   19.00    1.41
   0  11  -1   18.51    1.64
   0  11  -1   18.87    1.66
   0  11  -1   20.04    1.36
  -1  11  -1    2.25    0.50
  -1  11  -1    2.02    0.28
  -1  11  -1    1.34    0.44
  -2  11  -1    0.72    0.19
  -2  11  -1    0.52    0.39
  -2  11  -1    0.52    0.17
  -2  11  -1    0.13    0.22
  -3  11  -1   14.67    1.09
  -3  11  -1   14.75    1.05
  -3  11  -1   13.83    1.06
  -3  11  -1   14.53    1.04
  -4  11  -1    1.80    0.25
  -4  11  -1    1.79    0.31
  -5  11  -1    1.87    0.29
  -5  11  -1    2.12    0.24
  -6  11  -1    0.42    0.09
  -6  11  -1    0.17    0.16
  -6  11  -1    0.69    0.13
   7  10  -1    1.48    0.22
   7  10  -1    1.81    0.22
   7  10  -1    1.86    0.43
  -7 -10   1    1.45    0.27
   6  10  -1   15.61    1.41
   6  10  -1   14.89    1.22
   6  10  -1   16.37    1.13
   5  10  -1    0.50    0.16
   5  10  -1    1.23    0.59
   5  10  -1    0.60    0.45
  -5 -10   1    0.56    0.24
   4  10  -1    1.02    0.55
   4  10  -1    0.37    0.47
   3  10  -1    6.23    1.08
   3  10  -1    8.41    0.65
   3  10  -1    8.20    1.06
   3  10  -1    8.96    0.73
   3  10  -1    7.34    1.00
  -3 -10   1    8.47    1.01
   2  10  -1    0.22    0.22
   2  10  -1    0.82    0.72
   2  10  -1    0.56    0.17
   2  10  -1    0.71    0.46
   2  10  -1    0.14    0.46
  -2 -10   1    0.12    0.34
   1  10  -1   83.72    5.73
   1  10  -1   73.59    5.90
   1  10  -1   83.01    5.72
   1  10  -1   87.36    5.87
   1  10  -1   86.66    5.71
   1  10  -1   78.58    6.12
  -1 -10   1   79.49    5.91
   0  10  -1    7.42    0.57
   0  10  -1    6.46    0.60
   0  10  -1    9.36    1.50
   0  10  -1    6.22    0.95
   0  10  -1    5.88    0.67
  -1  10  -1   43.21    2.95
  -1  10  -1   41.56    2.95
  -1  10  -1   40.98    3.12
  -1  10  -1   42.71    3.54
  -1  10  -1   43.60    3.13
  -1  10  -1   38.19    2.92
  -1  10  -1   42.47    2.93
  -2  10  -1   19.95    1.43
  -2  10  -1   22.03    1.75
  -2  10  -1   17.30    1.53
  -2  10  -1   19.19    1.47
  -2  10  -1   20.98    1.45
  -2  10  -1   21.05    1.68
  -2  10  -1   18.24    1.42
  -2  10  -1   17.37    1.53
  -2  10  -1   22.16    1.47
  -3  10  -1   24.57    1.89
  -3  10  -1   24.20    1.73
  -3  10  -1   24.16    1.72
  -3  10  -1   23.26    1.79
  -3  10  -1   24.75    1.71
  -3  10  -1   25.87    1.75
  -3  10  -1   21.13    1.73
  -4  10  -1    0.29    0.21
  -4  10  -1   -0.35    0.35
  -4  10  -1    0.20    0.22
  -4  10  -1    0.13    0.17
  -4  10  -1    0.16    0.16
  -5  10  -1   23.23    1.66
  -6  10  -1    0.98    0.33
  -6  10  -1    1.07    0.17
  -6  10  -1    1.07    0.16
  -6  10  -1    1.40    0.18
  -7  10  -1    2.83    0.41
  -7  10  -1    2.94    0.27
  -7  10  -1    3.28    0.28
   8   9  -1    3.76    0.74
   8   9  -1    3.66    0.32
   7   9  -1   57.22    3.81
   7   9  -1   51.99    3.96
   6   9  -1    8.56    0.64
   6   9  -1    7.75    1.06
  -6  -9   1    7.77    0.73
   5   9  -1   75.33    4.87
   5   9  -1   68.52    4.90
   5   9  -1   70.38    5.02
  -5  -9   1   64.59    4.90
  -5  -9   1   78.06    5.13
  -5  -9   1   70.36    4.91
  -5  -9   1   64.10    4.89
   4   9  -1    0.19    0.48
   4   9  -1    0.10    0.16
   4   9  -1    1.14    0.66
   4   9  -1    0.24    0.42
  -4  -9   1    0.00    0.37
  -4  -9   1    0.49    0.21
  -4  -9   1    0.36    0.26
  -4  -9   1    0.59    0.24
   3   9  -1   37.06    2.45
   3   9  -1   30.60    2.82
   3   9  -1   36.49    2.43
   3   9  -1   32.09    2.62
   3   9  -1   33.51    2.66
  -3  -9   1   36.06    2.68
   2   9  -1   83.61    5.67
   2   9  -1   86.96    5.87
   2   9  -1   75.95    5.78
   2   9  -1   76.87    5.68
   2   9  -1   86.79    5.66
   2   9  -1   76.48    6.01
   2   9  -1   80.39    5.82
  -2  -9   1   84.44    5.88
   1   9  -1  110.37    7.79
   1   9  -1  118.39    7.68
   1   9  -1  109.47    8.03
   1   9  -1  110.73    7.67
   1   9  -1  123.12    7.87
   1   9  -1  108.29    7.67
   1   9  -1   99.54    7.83
   1   9  -1  104.86    7.68
  -1  -9   1  109.30    7.86
   0   9  -1  100.74    6.64
   0   9  -1   94.12    6.69
   0   9  -1   85.45    6.53
   0   9  -1   90.43    6.65
   0   9  -1   99.57    6.54
   0   9  -1   89.86    6.53
   0   9  -1  102.65    6.73
   0   9  -1   88.15    6.52
   0   9  -1  104.74    6.68
   0  -9   1   83.42    6.70
  -1   9  -1    7.69    0.62
  -1   9  -1    7.42    0.71
  -1   9  -1    8.92    0.90
  -1   9  -1    8.37    0.75
  -1   9  -1    6.82    0.74
  -1   9  -1    7.77    1.27
  -1   9  -1    8.36    0.65
  -1   9  -1    8.02    0.93
  -1   9  -1    6.47    0.76
  -2   9  -1   39.73    2.90
  -2   9  -1   42.49    3.09
  -2   9  -1   39.67    2.92
  -2   9  -1   39.67    2.99
  -2   9  -1   40.03    2.92
  -2   9  -1   39.16    3.09
  -2   9  -1   44.16    2.92
  -2   9  -1   47.74    3.60
  -3   9  -1    2.68    0.49
  -3   9  -1    2.72    0.37
  -3   9  -1    3.14    0.36
  -3   9  -1    2.38    0.32
  -3   9  -1    2.41    0.53
  -3   9  -1    3.18    0.60
  -3   9  -1    2.33    0.30
  -3   9  -1    1.58    0.99
  -3   9  -1    2.61    0.44
  -3   9  -1    2.95    0.42
  -4   9  -1   45.41    3.02
  -4   9  -1   44.09    3.06
  -4   9  -1   41.48    3.04
  -4   9  -1   43.12    3.07
  -4   9  -1   43.19    3.04
  -4   9  -1   38.59    3.14
  -4   9  -1   45.09    3.02
  -5   9  -1   15.41    1.18
  -5   9  -1   17.48    1.19
  -5   9  -1   13.92    1.35
  -5   9  -1   15.59    1.17
  -5   9  -1   17.56    1.18
  -5   9  -1   14.68    1.18
  -6   9  -1    3.21    0.38
  -6   9  -1    3.08    0.35
  -6   9  -1    3.50    0.54
  -7   9  -1    6.74    0.53
  -7   9  -1    5.59    0.69
  -7   9  -1    6.12    0.51
  -8   9  -1    0.08    0.15
  -8   9  -1    0.43    0.24
  -8   9  -1    0.31    0.12
  -8   9  -1    0.42    0.11
  -8   9  -1    0.22    0.09
   9   8  -1    4.59    0.37
   9   8  -1    5.94    0.66
   8   8  -1    0.85    0.44
   8   8  -1    1.05    0.47
   8   8  -1    0.86    0.23
   8   8  -1    1.00    0.18
  -8  -8   1    0.63    0.27
   7   8  -1   35.18    2.44
   7   8  -1   33.45    2.34
   7   8  -1   33.55    2.27
   7   8  -1   28.49    2.46
  -7  -8   1   30.13    2.31
   6   8  -1  120.06    7.83
   6   8  -1  105.37    7.94
   6   8  -1  113.39    7.85
  -6  -8   1  109.30    7.86
  -6  -8   1  110.69    7.87
  -6  -8   1  117.21    7.85
   5   8  -1   24.55    1.66
   5   8  -1   23.99    1.81
   5   8  -1   20.88    1.98
   5   8  -1   20.02    1.85
  -5  -8   1   22.67    1.72
  -5  -8   1   24.44    1.70
  -5  -8   1   27.19    1.99
  -5  -8   1   23.60    1.73
   4   8  -1   97.52    6.45
   4   8  -1   95.46    6.78
   4   8  -1   96.56    6.68
   4   8  -1   84.52    6.56
  -4  -8   1   94.86    6.48
  -4  -8   1   97.63    6.48
  -4  -8   1   84.14    6.46
   3   8  -1    1.50    0.42
   3   8  -1    1.37    0.22
   3   8  -1    1.15    0.39
   3   8  -1    1.90    0.26
   3   8  -1    1.15    0.54
  -3  -8   1    2.08    0.54
   2   8  -1   42.50    2.90
   2   8  -1   42.97    3.09
   2   8  -1   40.43    2.90
   2   8  -1   40.40    3.04
   2   8  -1   40.14    3.23
  -2  -8   1   41.61    3.11
   1   8  -1   41.19    2.78
   1   8  -1   39.34    2.93
   1   8  -1   36.19    2.78
   1   8  -1   37.01    2.76
   1   8  -1   45.04    2.95
   1   8  -1   42.05    2.90
   1   8  -1   37.95    3.13
  -1  -8   1   37.55    2.97
   0   8  -1  105.05    7.80
   0   8  -1  102.99    7.71
   0   8  -1  118.87    7.80
   0   8  -1   99.91    7.69
   0   8  -1  123.28    7.86
   0   8  -1  122.75    8.09
   0   8  -1  116.49    7.71
   0  -8   1   99.32    7.86
  -1   8  -1    1.45    0.21
  -1   8  -1    1.80    0.79
  -1   8  -1    1.88    0.32
  -1   8  -1    0.94    0.33
  -1   8  -1    1.85    0.43
  -1   8  -1    1.63    0.40
  -1   8  -1    1.55    0.46
  -1   8  -1    1.32    0.38
  -1   8  -1    1.85    0.34
  -1   8  -1    1.32    0.20
   1  -8   1    1.49    0.39
  -2   8  -1   18.01    1.33
  -2   8  -1   20.73    1.53
  -2   8  -1   17.32    1.30
  -2   8  -1   18.98    1.36
  -2   8  -1   18.20    1.39
  -2   8  -1   16.81    1.35
  -3   8  -1   12.18    1.26
  -3   8  -1   11.47    0.90
  -3   8  -1   10.18    1.05
  -3   8  -1   11.26    0.94
  -3   8  -1   10.55    0.90
  -3   8  -1   10.84    0.90
  -3   8  -1   13.95    1.19
  -3   8  -1   11.91    0.88
  -3   8  -1   11.70    0.93
  -3   8  -1   12.47    0.94
  -3   8  -1   12.25    0.93
  -4   8  -1    0.75    0.39
  -4   8  -1    0.42    0.17
  -4   8  -1    0.45    0.18
  -4   8  -1    0.90    0.46
  -4   8  -1    0.82    0.24
  -4   8  -1    0.72    0.20
  -4   8  -1    1.07    0.26
  -4   8  -1    0.79    0.22
  -4   8  -1    0.59    0.22
  -4   8  -1    0.88    0.20
  -4   8  -1    0.37    0.41
  -4   8  -1    0.65    0.21
  -5   8  -1    3.27    0.42
  -5   8  -1    3.13    0.57
  -5   8  -1    3.48    0.41
  -5   8  -1    4.23    0.40
  -5   8  -1    4.43    0.47
  -5   8  -1    2.78    0.39
  -5   8  -1    3.40    0.39
  -6   8  -1    2.04    0.30
  -6   8  -1    2.51    0.33
  -6   8  -1    2.22    0.32
  -6   8  -1    1.83    0.28
  -6   8  -1    1.89    0.48
  -6   8  -1    3.03    0.42
  -6   8  -1    2.23    0.30
  -7   8  -1   10.94    0.89
  -7   8  -1   12.96    0.89
  -7   8  -1   11.83    0.91
  -7   8  -1   10.71    1.08
  -7   8  -1   12.02    0.89
  -8   8  -1    2.96    0.31
  -8   8  -1    2.79    0.34
  -8   8  -1    2.49    0.45
  -8   8  -1    3.45    0.30
  -9   8  -1    8.48    0.58
  -9   8  -1    7.61    0.58
  -9   8  -1    7.50    0.60
  10   7  -1   28.80    2.16
   9   7  -1   45.74    3.22
   9   7  -1   42.05    3.00
   9   7  -1   41.44    3.15
   8   7  -1    1.71    0.47
   8   7  -1    1.49    0.28
   8   7  -1    2.04    0.30
   8   7  -1    1.66    0.69
  -8  -7   1    1.05    0.29
   7   7  -1    1.15    0.25
   7   7  -1    2.09    0.68
   7   7  -1    1.54    0.44
  -7  -7   1    2.04    0.49
  -7  -7   1    1.27    0.35
  -7  -7   1    2.01    0.32
  -7  -7   1    1.53    0.32
   6   7  -1    6.04    0.52
   6   7  -1    5.07    0.86
   6   7  -1    6.23    1.05
   6   7  -1    4.63    0.83
  -6  -7   1    5.06    0.66
  -6  -7   1    5.71    0.63
  -6  -7   1    6.36    0.66
  -6  -7   1    6.73    0.63
  -6  -7   1    7.42    0.96
   5   7  -1    0.00    0.51
   5   7  -1    0.16    0.31
   5   7  -1    0.64    0.48
   5   7  -1    0.15    0.16
  -5  -7   1    0.05    0.43
  -5  -7   1    0.24    0.26
  -5  -7   1    0.13    0.20
  -5  -7   1   -0.17    0.26
  -5  -7   1    0.28    0.27
   4   7  -1    8.21    0.91
   4   7  -1    9.06    0.92
   4   7  -1    8.92    1.04
   4   7  -1    8.18    0.63
  -4  -7   1    8.28    0.98
  -4  -7   1    8.28    0.71
  -4  -7   1    7.23    0.67
  -4  -7   1    7.85    0.70
  -4  -7   1    7.76    0.69
   3   7  -1   10.39    0.76
   3   7  -1   11.12    0.99
   3   7  -1   11.63    0.98
   3   7  -1    8.69    0.95
   3   7  -1    8.69    1.08
   3   7  -1   10.62    0.89
  -3  -7   1    9.95    1.06
  -3  -7   1   10.45    0.81
   2   7  -1    1.50    0.36
   2   7  -1    1.69    0.22
   2   7  -1    1.65    0.37
   2   7  -1    1.04    0.45
  -2  -7   1    1.46    0.47
   1   7  -1   10.58    0.93
   1   7  -1    9.14    0.89
   1   7  -1   11.50    0.93
   1   7  -1   11.57    0.91
   1   7  -1   10.76    1.18
   1   7  -1    9.73    0.76
  -1  -7   1   10.04    1.04
   0   7  -1    3.49    0.50
   0   7  -1    3.85    0.44
   0   7  -1    4.51    0.77
   0   7  -1    3.08    0.31
   0  -7   1    3.32    0.54
  -1   7  -1   11.07    0.85
  -1   7  -1   12.72    0.94
  -1   7  -1   10.47    1.16
  -1   7  -1   12.71    0.91
  -1   7  -1   11.10    0.89
  -1   7  -1   12.60    0.93
  -1   7  -1   11.71    0.92
   1  -7   1   10.63    1.04
  -2   7  -1   28.18    2.03
  -2   7  -1   26.49    2.19
  -2   7  -1   27.84    2.15
  -2   7  -1   29.51    2.04
  -2   7  -1   29.95    2.19
  -2   7  -1   31.76    2.02
   2  -7   1   25.19    2.11
  -3   7  -1    0.87    0.39
  -3   7  -1    1.71    0.85
  -3   7  -1    1.76    0.40
  -3   7  -1    1.04    0.19
  -3   7  -1    0.96    0.20
  -3   7  -1    0.87    0.16
  -3   7  -1    0.94    0.21
  -3   7  -1    1.21    0.23
  -3   7  -1    0.60    0.16
  -3   7  -1    1.25    0.24
  -3   7  -1    0.89    0.36
  -3   7  -1    1.00    0.33
  -3   7  -1    0.70    0.16
  -3   7  -1    1.57    0.40
  -3   7  -1    1.20    0.23
  -4   7  -1   24.58    1.87
  -4   7  -1   26.37    1.90
  -4   7  -1   27.46    1.90
  -4   7  -1   25.81    1.91
  -4   7  -1   24.91    2.07
  -4   7  -1   28.22    2.03
  -4   7  -1   29.01    1.91
  -4   7  -1   24.60    2.00
  -5   7  -1    2.62    0.36
  -5   7  -1    3.00    0.40
  -5   7  -1    3.39    0.49
  -5   7  -1    2.80    0.39
  -5   7  -1    3.12    0.37
  -5   7  -1    3.32    0.44
  -5   7  -1    2.72    0.35
  -6   7  -1    2.53    0.33
  -6   7  -1    2.17    0.29
  -6   7  -1    2.70    0.33
  -6   7  -1    2.30    0.50
  -6   7  -1    2.39    0.32
  -6   7  -1    2.52    0.32
   6  -7   1    1.30    0.86
  -7   7  -1    2.09    0.30
  -7   7  -1    2.09    0.30
  -7   7  -1    2.37    0.32
  -7   7  -1    2.42    0.51
  -7   7  -1    1.95    0.29
  -8   7  -1    0.22    0.18
  -8   7  -1    0.04    0.13
  -8   7  -1    0.35    0.38
  -8   7  -1    0.12    0.18
  -8   7  -1   -0.12    0.17
  -8   7  -1    0.08    0.14
  -9   7  -1    4.70    0.36
  -9   7  -1    3.97    0.40
  -9   7  -1    4.17    0.39
  -9   7  -1    4.13    0.54
  10   6  -1   10.78    1.04
   9   6  -1    0.69    0.44
   9   6  -1    1.33    0.21
   9   6  -1    1.89    0.79
   8   6  -1    3.97    0.89
   8   6  -1    2.37    0.52
  -8  -6   1    2.17    0.34
   7   6  -1   29.48    2.38
  -7  -6   1   29.69    2.05
  -7  -6   1   28.49    2.26
  -7  -6   1   27.79    2.08
  -7  -6   1   26.87    2.07
  -7  -6   1   27.08    2.07
   6   6  -1   62.28    4.51
   6   6  -1   58.74    4.32
  -6  -6   1   56.10    4.38
  -6  -6   1   68.90    4.59
  -6  -6   1   64.55    4.38
  -6  -6   1   63.56    4.38
   5   6  -1   52.41    3.75
   5   6  -1   48.62    3.67
   5   6  -1   44.21    3.52
  -5  -6   1   51.00    3.57
  -5  -6   1   54.11    3.56
  -5  -6   1   51.11    3.56
  -5  -6   1   52.63    3.77
   4   6  -1   12.27    1.09
   4   6  -1   12.76    1.10
   4   6  -1   10.49    0.87
  -4  -6   1   13.02    0.96
  -4  -6   1   11.76    0.93
  -4  -6   1   12.04    0.92
  -4  -6   1   12.29    1.19
   3   6  -1    8.01    0.82
  -3  -6   1    7.92    0.64
  -3  -6   1    7.52    0.91
  -3  -6   1    7.87    0.67
  -3  -6   1    8.12    0.64
  -2  -6   1   61.58    4.29
  -1   6  -1    6.36    0.77
   2  -6   1    2.41    0.37
  -3   6  -1  119.13    8.41
  -4   6  -1   30.67    2.33
  -4   6  -1   30.39    2.24
  -4   6  -1   28.26    2.22
  -4   6  -1   34.86    2.43
  -4   6  -1   35.23    2.27
  -4   6  -1   27.72    2.24
  -4   6  -1   33.68    2.37
  -4   6  -1   33.22    2.25
  -5   6  -1   13.34    0.92
  -5   6  -1   13.42    0.92
  -5   6  -1   12.60    0.92
  -5   6  -1   11.75    1.13
  -5   6  -1   11.12    0.88
  -5   6  -1   11.70    0.92
  -5   6  -1   10.41    0.87
  -5   6  -1   10.94    1.04
  -5   6  -1   10.27    0.89
  -6   6  -1   19.29    1.33
  -6   6  -1   17.51    1.30
  -6   6  -1   15.67    1.31
  -6   6  -1   15.92    1.50
  -6   6  -1   18.16    1.48
  -6   6  -1   19.17    1.34
  -6   6  -1   17.88    1.30
  -6   6  -1   19.09    1.34
  -7   6  -1    4.25    0.49
  -7   6  -1    4.31    0.43
  -7   6  -1    4.59    0.45
  -7   6  -1    4.63    0.77
  -7   6  -1    4.91    0.49
  -7   6  -1    4.39    0.49
   7  -6   1    3.28    1.01
  -8   6  -1    9.90    0.75
  -8   6  -1    8.16    0.73
  -8   6  -1    9.09    0.70
  -8   6  -1    8.68    0.93
  -8   6  -1    8.01    0.73
  -8   6  -1    8.50    0.68
   8  -6   1    8.37    0.87
  -9   6  -1    6.01    0.56
  -9   6  -1    6.48    0.51
  -9   6  -1    5.50    0.54
  -9   6  -1    6.53    0.71
  -9   6  -1    5.84    0.62
  -9   6  -1    7.33    0.53
 -10   6  -1   13.46    0.99
 -10   6  -1   14.44    0.99
  10  -6   1   12.82    1.05
  10   5  -1   28.11    2.32
  10   5  -1   26.38    1.89
   9   5  -1    1.39    0.45
   9   5  -1    1.85    0.94
  -9  -5   1    0.99    0.25
  -9  -5   1    0.81    0.34
   8   5  -1   15.00    1.33
   8   5  -1   15.64    1.75
  -8  -5   1   13.43    1.16
  -8  -5   1   13.79    1.09
  -8  -5   1   11.73    1.08
   7   5  -1   70.52    4.74
  -7  -5   1   59.67    4.52
  -7  -5   1   65.99    4.50
  -7  -5   1   64.97    4.54
  -7  -5   1   61.92    4.52
  -7  -5   1   60.97    4.65
   6   5  -1   82.87    6.35
  -6  -5   1   89.57    6.23
  -6  -5   1   90.20    6.39
  -6  -5   1   95.38    6.25
  -6  -5   1   88.43    6.22
  -6  -5   1   87.94    6.23
   5   5  -1    0.34    0.31
  -5  -5   1    0.37    0.21
  -5  -5   1    0.33    0.22
  -5  -5   1    0.23    0.24
  -5  -5   1    0.23    0.29
  -5  -5   1    0.79    0.41
  -4  -5   1   51.14    3.80
  -4  -5   1   55.64    3.81
  -4  -5   1   54.90    3.96
  -4  -5   1   55.15    3.80
  -3  -5   1   11.87    0.90
  -3  -5   1   12.86    0.92
  -3  -5   1   11.77    0.90
   2   5  -1  163.18   11.38
  -1   5  -1    0.69    0.32
  -2   5  -1   19.59    1.56
  -3   5  -1   11.11    1.04
  -4   5  -1   31.13    2.34
  -5   5  -1    9.05    0.82
  -5   5  -1    9.43    0.71
  -5   5  -1    9.79    0.90
  -5   5  -1    7.12    0.71
  -5   5  -1    8.95    0.71
  -6   5  -1   40.52    2.70
  -6   5  -1   40.39    2.71
  -6   5  -1   36.94    2.80
  -6   5  -1   34.27    2.67
  -6   5  -1   41.42    2.72
   6  -5   1   33.04    3.22
  -7   5  -1    1.74    0.28
  -7   5  -1    2.47    0.49
  -7   5  -1    2.25    0.38
  -7   5  -1    1.86    0.28
  -7   5  -1    1.20    0.43
  -7   5  -1    1.60    0.27
  -7   5  -1    1.65    0.28
   7  -5   1    1.09    0.46
   7  -5   1    2.15    0.95
   7  -5   1    1.43    0.34
  -8   5  -1   14.88    1.28
  -8   5  -1   18.97    1.45
  -8   5  -1   17.67    1.27
  -8   5  -1   16.61    1.23
  -8   5  -1   15.05    1.27
  -8   5  -1   17.83    1.27
   8  -5   1   15.60    2.10
   8  -5   1   19.04    1.40
  -9   5  -1   12.88    1.06
  -9   5  -1   12.76    1.07
  -9   5  -1   15.45    1.19
  -9   5  -1   14.00    1.03
 -10   5  -1    9.99    0.72
 -10   5  -1    8.99    0.70
 -10   5  -1    8.20    0.76
  10  -5   1    9.03    0.89
 -11  -4   1    6.18    0.52
  10   4  -1   48.83    3.31
  10   4  -1   45.82    3.71
  -9  -4   1   26.13    1.98
  -9  -4   1   27.26    1.92
   8   4  -1    1.71    0.88
  -8  -4   1    0.95    0.26
  -8  -4   1    1.42    0.31
  -8  -4   1    0.57    0.54
  -8  -4   1    0.76    0.29
  -8  -4   1    0.46    0.25
  -8  -4   1    1.44    0.42
   7   4  -1    3.45    0.79
  -7  -4   1    3.68    0.51
  -7  -4   1    3.09    0.48
  -7  -4   1    2.99    0.51
  -7  -4   1    3.73    0.51
  -7  -4   1    3.36    0.41
  -6  -4   1  125.25    8.77
  -6  -4   1  125.43    8.77
  -6  -4   1  130.17    8.75
  -6  -4   1  122.08    8.88
   5   4  -1   29.87    2.37
  -5  -4   1   30.61    2.35
  -5  -4   1   31.88    2.21
  -5  -4   1   30.54    2.19
  -5  -4   1   30.03    2.19
  -2  -4   1   21.09    1.47
  -2  -4   1   21.46    1.47
  -2  -4   1   20.22    1.48
   1   4  -1  205.89   14.30
  -2   4  -1    1.83    0.35
  -3   4  -1    8.39    0.78
  -5   4  -1   85.37    6.00
  -6   4  -1   54.73    3.51
  -6   4  -1   48.13    3.51
   6  -4   1   45.38    3.92
  -7   4  -1   13.29    0.99
  -7   4  -1   13.37    1.03
  -7   4  -1   12.91    1.02
  -7   4  -1   14.96    1.16
   7  -4   1   13.80    1.12
   7  -4   1   10.85    1.19
   7  -4   1   13.67    1.87
  -8   4  -1   21.16    1.56
  -8   4  -1   20.59    1.59
  -8   4  -1   20.48    1.55
  -8   4  -1   21.97    1.53
  -8   4  -1   21.99    1.57
  -8   4  -1   20.38    1.69
   8  -4   1   23.08    2.40
  -9   4  -1    0.46    0.24
  -9   4  -1    0.34    0.37
  -9   4  -1    0.61    0.22
  -9   4  -1    0.45    0.14
  -9   4  -1    0.69    0.21
 -10   4  -1    0.06    0.26
 -10   4  -1    0.12    0.20
 -10   4  -1    0.48    0.17
 -10   4  -1    0.14    0.16
  10  -4   1   -0.15    0.41
 -11   4  -1    2.97    0.28
 -11   4  -1    2.82    0.31
  11  -4   1    2.79    0.40
 -10  -3   1    9.54    0.85
   8   3  -1   11.81    1.61
  -8  -3   1   10.02    0.90
  -8  -3   1    8.55    0.76
  -8  -3   1    7.51    1.00
  -8  -3   1    8.72    0.83
   7   3  -1   74.57    5.60
  -7  -3   1   78.00    5.34
  -7  -3   1   72.86    5.36
  -7  -3   1   77.13    5.36
  -7  -3   1   79.80    5.40
   6   3  -1    7.07    0.67
   6   3  -1    8.14    0.64
  -6  -3   1    6.91    0.61
  -6  -3   1    7.60    0.72
  -6  -3   1    6.68    0.62
  -6  -3   1    6.00    0.75
  -6  -3   1    6.04    0.63
   5   3  -1  194.68   13.50
   4   3  -1   29.89    2.26
  -4  -3   1   33.73    2.27
  -4  -3   1   32.77    2.27
  -4  -3   1   32.33    2.28
  -3  -3   1    4.17    0.35
  -3  -3   1    4.54    0.36
  -3  -3   1    4.02    0.38
  -1  -3   1    1.76    0.17
   0   3  -1   13.09    1.04
  -1   3  -1    6.64    0.60
  -3   3  -1   15.10    1.13
  -4   3  -1    4.64    0.57
  -4   3  -1    5.79    0.52
  -5   3  -1   23.19    1.70
  -5   3  -1   24.20    1.62
   5  -3   1   19.01    1.57
   5  -3   1   20.43    1.95
  -6   3  -1   12.97    1.18
  -6   3  -1   13.14    1.00
  -6   3  -1   12.54    0.99
  -6   3  -1   10.84    0.89
   6  -3   1   10.19    1.54
   6  -3   1   10.28    1.02
  -7   3  -1   24.50    1.69
  -7   3  -1   23.17    1.71
  -7   3  -1   22.28    1.66
   7  -3   1   22.44    1.74
   7  -3   1   25.29    2.31
   7  -3   1   23.97    1.76
   7  -3   1   22.72    1.81
  -8   3  -1    0.15    0.20
  -8   3  -1    0.48    0.21
  -8   3  -1    0.62    0.42
  -8   3  -1    0.51    0.24
  -8   3  -1    0.36    0.13
  -8   3  -1    0.21    0.61
  -8   3  -1    0.41    0.21
  -8   3  -1    0.43    0.36
   8  -3   1    0.42    0.56
   8  -3   1    0.35    0.36
   8  -3   1    1.11    0.45
   8  -3   1    0.45    0.91
  -9   3  -1    4.85    0.51
  -9   3  -1    5.22    0.69
  -9   3  -1    4.78    0.47
  -9   3  -1    3.53    0.74
  -9   3  -1    3.90    0.54
  -9   3  -1    3.98    0.47
   9  -3   1    4.72    0.66
   9  -3   1    4.42    1.12
   9  -3   1    4.65    0.71
 -10   3  -1    4.31    0.55
 -10   3  -1    4.08    0.49
 -10   3  -1    4.77    0.44
  10  -3   1    4.77    0.85
 -11   3  -1    2.11    0.25
 -11   3  -1    1.95    0.30
  11  -3   1    1.93    0.42
  11   2  -1   21.89    1.78
 -11  -2   1   21.03    1.47
 -11  -2   1   18.74    1.47
 -10  -2   1    2.89    0.41
   9   2  -1   23.25    1.70
  -9  -2   1   19.04    1.59
  -9  -2   1   19.60    1.58
   8   2  -1    0.57    0.50
   8   2  -1    1.78    0.48
  -8  -2   1    1.51    0.41
  -8  -2   1    1.02    0.46
  -8  -2   1    1.04    0.32
   7   2  -1  254.20   16.66
  -7  -2   1  223.44   16.44
  -7  -2   1  230.03   16.43
  -7  -2   1  240.51   16.74
   6   2  -1    1.77    0.36
   6   2  -1    1.07    0.28
  -6  -2   1    0.89    0.21
  -6  -2   1    1.14    0.31
  -6  -2   1    1.16    0.29
  -6  -2   1    0.98    0.20
  -6  -2   1    1.06    0.49
  -6  -2   1    1.24    0.23
   5   2  -1   85.29    5.79
   5   2  -1   87.95    5.81
  -5  -2   1   81.48    5.80
  -5  -2   1   77.84    5.86
   4   2  -1    4.60    0.41
   4   2  -1    4.42    0.37
  -4  -2   1    4.35    0.37
  -4  -2   1    4.18    0.38
  -4  -2   1    3.81    0.57
  -4  -2   1    3.77    0.41
   2   2  -1    0.95    0.14
  -2  -2   1    1.14    0.16
  -2  -2   1    1.41    0.14
  -2  -2   1    1.60    0.14
  -2   2  -1    2.68    0.28
  -3   2  -1   51.02    3.60
  -4   2  -1    5.95    0.64
  -4   2  -1    5.97    0.53
  -4   2  -1    6.67    0.54
   4  -2   1    6.75    0.50
  -5   2  -1    1.40    0.37
  -5   2  -1    1.94    0.28
  -5   2  -1    2.13    0.34
   5  -2   1    1.37    0.25
   5  -2   1    1.24    0.27
   5  -2   1    2.23    0.57
  -6   2  -1   19.31    1.43
  -6   2  -1   18.17    1.42
  -6   2  -1   19.22    1.62
   6  -2   1   18.25    1.40
   6  -2   1   18.05    1.45
   6  -2   1   21.51    1.84
  -7   2  -1    2.07    0.37
  -7   2  -1    1.84    0.40
  -7   2  -1    1.65    0.37
  -7   2  -1    1.68    0.25
  -7   2  -1    1.43    0.60
   7  -2   1    1.61    0.31
   7  -2   1    1.63    0.45
   7  -2   1    1.31    0.36
   7  -2   1    1.45    0.74
  -8   2  -1   12.12    0.97
  -8   2  -1   13.27    1.11
  -8   2  -1   13.46    1.54
  -8   2  -1   11.44    0.98
   8  -2   1   11.87    1.12
   8  -2   1   13.55    1.90
   8  -2   1   14.35    1.14
   8  -2   1   10.44    1.23
  -9   2  -1   94.78    6.62
 -10   2  -1    0.02    0.25
 -10   2  -1   -0.10    0.22
 -10   2  -1    0.37    0.19
 -10   2  -1    0.40    0.23
 -10   2  -1    0.24    0.27
  10  -2   1   -0.50    0.52
 -11   2  -1   31.18    2.28
 -11   2  -1   28.48    2.25
 -11   2  -1   34.95    2.28
  11  -2   1   33.68    2.38
  11   1  -1   18.25    1.65
 -11  -1   1   16.70    1.32
 -11  -1   1   19.73    1.33
  10   1  -1    1.77    0.89
  10   1  -1    1.30    0.49
   9   1  -1    2.01    0.58
   9   1  -1    1.73    0.83
  -9  -1   1    1.23    0.43
  -9  -1   1    2.10    0.39
  -9  -1   1    2.02    0.41
  -9  -1   1    2.38    0.97
   8   1  -1    6.81    0.94
   8   1  -1    7.39    0.90
  -8  -1   1    6.41    0.70
  -8  -1   1    6.74    0.74
  -8  -1   1    6.46    0.55
  -8  -1   1    8.98    1.64
  -8  -1   1    5.79    0.76
   7   1  -1   12.66    1.08
   7   1  -1   12.52    0.99
  -7  -1   1   10.63    0.91
  -7  -1   1   11.73    0.85
  -7  -1   1    9.49    0.93
  -7  -1   1   10.80    1.49
  -7  -1   1   10.62    1.00
  -7  -1   1   10.13    0.90
   6   1  -1  202.69   14.04
  -6  -1   1  201.73   14.02
   5   1  -1   38.20    2.35
  -5  -1   1   33.48    2.33
  -5  -1   1   30.06    2.52
  -5  -1   1   31.14    2.38
  -5  -1   1   33.01    2.36
  -5  -1   1   32.26    2.33
   4   1  -1   18.56    1.20
   4   1  -1   17.16    1.17
  -4  -1   1   16.73    1.24
  -4  -1   1   14.13    1.31
  -4  -1   1   14.83    1.18
  -4  -1   1   16.06    1.17
  -4  -1   1   16.50    1.17
  -3  -1   1   67.40    4.76
  -2  -1   1  126.59    8.83
   1   1  -1   17.24    1.20
  -1   1  -1  330.20   22.84
  -2   1  -1    0.50    0.14
  -2   1  -1    0.88    0.12
  -2   1  -1    0.69    0.11
  -3   1  -1  247.31   17.19
  -4   1  -1   15.24    1.17
  -4   1  -1   15.67    1.16
   4  -1   1   16.80    1.16
   4  -1   1   16.24    1.14
  -5   1  -1  246.24   17.21
  -6   1  -1   24.61    1.86
  -6   1  -1   26.61    1.88
  -6   1  -1   25.13    2.06
   6  -1   1   26.19    1.87
   6  -1   1   23.43    1.84
   6  -1   1   28.28    2.13
  -7   1  -1   92.30    6.21
  -7   1  -1   94.28    6.19
  -7   1  -1   81.86    6.17
  -7   1  -1   89.77    6.23
  -7   1  -1   96.10    6.43
   7  -1   1   85.07    6.22
   7  -1   1   80.94    6.19
  -8   1  -1    3.90    0.56
  -8   1  -1    3.63    0.41
  -8   1  -1    3.00    0.81
  -8   1  -1    4.01    0.53
  -8   1  -1    3.77    0.56
   8  -1   1    3.35    0.62
   8  -1   1    3.85    0.94
  -9   1  -1   22.56    1.52
  -9   1  -1   21.43    1.58
  -9   1  -1   22.22    1.57
  -9   1  -1   18.65    1.65
  -9   1  -1   22.16    2.06
   9  -1   1   19.52    1.69
   9  -1   1   18.66    1.64
   9  -1   1   18.49    1.74
 -10   1  -1    6.15    0.64
 -10   1  -1    6.19    0.59
 -10   1  -1    6.46    0.55
  10  -1   1    5.70    1.01
 -11   1  -1   36.53    2.51
 -11   1  -1   33.80    2.50
  11  -1   1   35.15    2.60
  12  -1   1    1.79    0.30
 -11   0   1    0.42    0.17
 -11   0   1    0.25    0.17
 -11   0   1    0.01    0.17
  10   0  -1    4.88    0.62
 -10   0   1    3.65    0.51
   9   0  -1   30.88    2.73
   9   0  -1   36.96    2.70
  -9   0   1   35.40    2.59
  -9   0   1   37.19    2.53
  -9   0   1   34.09    2.58
  -9   0   1   39.93    3.08
   8   0  -1  117.36    8.58
   8   0  -1  112.51    8.54
  -8   0   1  129.12    8.48
  -8   0   1  128.37    8.52
  -8   0   1  120.16    8.54
  -8   0   1  128.05    8.52
  -8   0   1  116.85    8.78
   7   0  -1   59.10    4.04
   7   0  -1   53.56    4.08
   7   0  -1   61.87    4.05
  -7   0   1   63.04    4.34
  -7   0   1   52.26    4.00
  -7   0   1   55.61    3.98
  -7   0   1   53.56    4.04
  -7   0   1   56.68    4.02
   6   0  -1   29.14    1.95
  -6   0   1   25.79    1.91
  -6   0   1   25.57    2.16
  -6   0   1   23.33    1.88
  -5   0   1   61.70    4.27
  -5   0   1   62.51    4.44
  -5   0   1   59.75    4.27
  -4   0   1   20.67    1.48
  -4   0   1   22.39    1.46
  -4   0   1   22.14    1.46
  -4   0   1   18.67    1.49
  -4   0   1   19.19    1.61
  -3   0   1   49.95    3.55
  -2   0   1   26.36    1.89
  -1   0   1    2.05    0.16
  -1   0  -1  106.13    7.37
  -2   0  -1   26.50    1.90
  -3   0  -1  110.32    7.75
  -4   0  -1   35.52    2.34
  -4   0  -1   35.27    2.34
  -4   0  -1   35.05    2.36
  -4   0  -1   33.49    2.36
   4   0   1   31.63    2.35
   4   0   1   30.22    2.34
  -5   0  -1   74.26    5.24
  -5   0  -1   75.41    5.25
  -5   0  -1   76.76    5.39
  -6   0  -1   75.96    5.29
  -7   0  -1   99.04    6.92
  -7   0  -1   97.69    6.93
  -7   0  -1  100.74    6.96
  -7   0  -1   97.02    7.16
   7   0   1   97.81    6.94
   7   0   1  102.29    6.92
  -8   0  -1    1.09    0.45
  -8   0  -1    1.65    0.78
  -8   0  -1    1.24    0.22
  -8   0  -1    1.18    0.31
  -8   0  -1    2.29    0.42
   8   0   1    1.50    0.89
   8   0   1    1.50    0.41
   8   0   1    0.61    0.45
  -9   0  -1   20.57    2.07
  -9   0  -1   18.09    1.54
  -9   0  -1   18.37    1.37
  -9   0  -1   20.18    1.46
   9   0   1   17.97    1.60
   9   0   1   17.47    1.51
   9   0   1   18.98    1.57
 -10   0  -1   18.07    1.40
 -10   0  -1   19.07    1.43
  10   0   1   18.44    1.61
 -11   0  -1    9.06    0.76
 -11   0  -1    9.62    0.78
  11   0   1   10.00    1.05
 -12   0  -1    5.72    0.45
 -12   0  -1    4.83    0.44
  11  -1  -1   15.12    1.24
 -11   1   1   16.06    1.14
  10  -1  -1    1.47    0.53
 -10   1   1    1.49    0.27
  -9   1   1   24.41    2.16
  -9   1   1   20.16    1.66
  -9   1   1   22.54    1.62
  -9   1   1   23.35    1.65
  -8   1   1   72.83    5.46
  -8   1   1   81.23    5.75
  -8   1   1   81.56    5.43
  -8   1   1   71.70    5.39
  -8   1   1   79.78    5.44
   7  -1  -1   41.85    3.49
   7  -1  -1   44.31    3.44
   7  -1  -1   49.67    3.46
  -7   1   1   53.71    3.73
  -7   1   1   48.99    3.44
  -7   1   1   51.83    3.46
  -7   1   1   47.79    3.42
  -7   1   1   47.17    3.40
  -7   1   1   47.36    3.38
   6  -1  -1  102.33    6.64
   6  -1  -1   95.93    6.60
  -6   1   1   98.34    6.61
  -6   1   1   92.91    6.59
  -6   1   1   83.07    6.57
  -5   1   1  219.26   15.32
  -4   1   1  125.13    8.82
  -3   1   1   58.61    3.74
  -3   1   1   48.98    3.81
  -2   1   1  148.22   10.31
   1  -1  -1    2.02    0.18
  -1   1   1    2.09    0.25
   0  -1  -1    3.29    0.27
   0  -1  -1    3.95    0.27
   0  -1  -1    4.11    0.28
  -1  -1  -1    0.62    0.07
  -1  -1  -1    0.61    0.07
  -1  -1  -1    0.79    0.08
   1   1   1    0.81    0.11
   1   1   1    0.75    0.06
  -2  -1  -1   16.44    1.06
  -2  -1  -1   14.23    1.07
   2   1   1   16.12    1.10
   2   1   1   14.40    1.06
   2   1   1   14.62    1.06
  -3  -1  -1   71.75    5.07
  -4  -1  -1   18.76    1.22
  -4  -1  -1   17.63    1.22
  -4  -1  -1   16.55    1.23
   4   1   1   14.85    1.21
   4   1   1   18.06    1.31
  -5  -1  -1   33.72    2.40
  -5  -1  -1   31.87    2.41
  -5  -1  -1   35.75    2.38
  -5  -1  -1   37.60    2.38
  -5  -1  -1   30.51    2.54
   5   1   1   34.23    2.37
   5   1   1   32.37    2.38
  -6  -1  -1  164.90   10.94
  -6  -1  -1  158.58   11.14
  -6  -1  -1  149.79   10.97
  -7  -1  -1   39.71    2.80
  -7  -1  -1   39.05    2.84
  -7  -1  -1   37.97    3.10
  -7  -1  -1   37.33    2.78
   7   1   1   43.60    2.77
   7   1   1   36.03    2.76
  -8  -1  -1   16.03    1.43
  -8  -1  -1   16.60    1.36
  -8  -1  -1   17.32    1.96
  -8  -1  -1   16.68    1.40
   8   1   1   19.09    1.38
   8   1   1   19.70    1.43
   8   1   1   18.08    1.39
  -9  -1  -1   30.98    2.66
  -9  -1  -1   28.95    2.13
  -9  -1  -1   28.07    2.10
   9   1   1   27.12    2.15
   9   1   1   27.22    2.15
 -10  -1  -1    0.67    0.34
  10   1   1    0.89    0.51
  10   1   1    1.60    0.89
 -11  -1  -1   30.45    2.16
 -11  -1  -1   27.87    2.15
  11   1   1   32.48    2.67
  11   1   1   30.11    2.24
 -12  -1  -1    3.19    0.32
 -12  -1  -1    4.11    0.35
  11  -2  -1   11.19    0.89
 -11   2   1    9.28    0.75
  10  -2  -1    8.89    1.02
  -9   2   1    4.86    0.54
  -9   2   1    4.12    0.57
  -9   2   1    5.90    0.91
  -9   2   1    4.16    0.46
  -9   2   1    5.14    0.50
   8  -2  -1    5.74    0.72
   8  -2  -1    4.46    0.80
   8  -2  -1    7.80    1.27
  -8   2   1    6.13    0.56
  -8   2   1    6.57    0.69
  -8   2   1    4.52    0.67
  -8   2   1    4.59    0.43
  -8   2   1    5.43    0.55
  -8   2   1    6.20    0.59
  -8   2   1    5.22    0.50
  -8   2   1    4.99    0.90
   7  -2  -1   19.49    1.76
   7  -2  -1   23.73    1.79
  -7   2   1   23.54    1.67
  -7   2   1   23.62    1.72
  -7   2   1   21.79    1.65
  -7   2   1   24.39    1.71
   5  -2  -1    0.21    0.31
   5  -2  -1    0.15    0.26
  -5   2   1    0.62    0.39
  -5   2   1    0.25    0.21
  -5   2   1    0.27    0.22
   4  -2  -1   29.48    1.98
   4  -2  -1   27.35    1.97
  -4   2   1   26.08    1.97
  -4   2   1   27.89    1.98
  -4   2   1   28.57    2.09
   3  -2  -1    3.89    0.36
   3  -2  -1    5.31    0.39
  -3   2   1    4.04    0.37
  -3   2   1    4.61    0.38
  -3   2   1    5.09    0.51
  -2   2   1   76.01    5.31
  -1   2   1    1.96    0.27
   0   2   1  740.29   51.21
   3   2   1   31.00    2.22
   3   2   1   32.43    2.21
  -4  -2  -1   25.21    1.77
  -4  -2  -1   24.96    1.72
   4   2   1   23.94    1.70
   4   2   1   22.88    1.71
  -5  -2  -1    9.10    0.79
  -5  -2  -1    9.47    0.71
  -5  -2  -1   10.24    0.71
  -5  -2  -1    8.94    0.74
   5   2   1    8.43    0.69
   5   2   1    9.00    0.71
  -6  -2  -1   21.01    1.51
  -6  -2  -1   20.80    1.55
  -6  -2  -1   20.63    1.50
  -6  -2  -1   18.52    1.56
   6   2   1   21.82    1.51
   6   2   1   22.08    1.52
  -7  -2  -1    0.94    0.26
  -7  -2  -1    1.83    0.48
  -7  -2  -1    1.01    0.24
  -7  -2  -1    1.18    0.22
  -7  -2  -1    1.34    0.37
  -7  -2  -1    1.29    0.59
  -7  -2  -1    1.03    0.21
   7   2   1    1.65    0.32
   7   2   1    1.34    0.27
   7   2   1    2.47    0.77
  -8  -2  -1    2.81    0.57
  -8  -2  -1    3.20    0.97
  -8  -2  -1    1.87    0.33
  -8  -2  -1    2.31    0.41
  -8  -2  -1    3.26    0.49
   8   2   1    2.41    0.40
   8   2   1    4.29    1.03
   8   2   1    2.02    0.41
  -9  -2  -1    1.21    0.50
  -9  -2  -1    0.68    0.35
  -9  -2  -1    1.15    0.46
  -9  -2  -1    1.30    0.92
   9   2   1    1.45    0.45
   9   2   1    1.08    0.40
   9   2   1    2.29    0.84
  10   2   1   91.37    6.43
 -12  -2  -1    0.44    0.17
  12   2   1    0.84    0.41
  10  -3  -1   31.22    2.15
 -10   3   1   24.88    2.03
 -10   3   1   29.72    2.01
  -9   3   1    2.87    0.45
  -9   3   1    2.90    0.30
  -9   3   1    3.22    0.37
  -9   3   1    2.89    0.41
   8  -3  -1   39.55    2.76
  -8   3   1   32.42    2.60
  -8   3   1   37.87    2.65
  -8   3   1   39.74    2.95
   7  -3  -1    7.02    0.84
   7  -3  -1    5.71    0.81
   7  -3  -1    6.15    0.73
  -7   3   1    7.24    0.70
  -7   3   1    6.09    0.50
  -7   3   1    7.32    0.59
  -7   3   1    5.50    0.55
  -7   3   1    6.71    0.56
   6  -3  -1    2.20    0.38
   6  -3  -1    1.92    0.52
   6  -3  -1    1.77    0.42
   6  -3  -1    2.50    1.03
  -6   3   1    2.01    0.30
  -6   3   1    2.84    0.58
  -6   3   1    1.55    0.22
  -6   3   1    2.53    0.39
  -6   3   1    2.52    0.34
   5  -3  -1   48.17    3.53
   5  -3  -1   47.35    3.51
  -5   3   1   55.40    3.63
  -5   3   1   50.68    3.49
  -5   3   1   47.28    3.51
   4  -3  -1    2.76    0.36
   4  -3  -1    2.13    0.32
  -4   3   1    2.75    0.42
  -4   3   1    2.62    0.32
  -4   3   1    2.85    0.35
   3  -3  -1    3.49    0.34
  -3   3   1    3.11    0.32
  -3   3   1    3.45    0.37
  -3   3   1    4.06    0.46
  -2   3   1   18.57    1.34
  -2   3   1   17.82    1.28
  -1   3   1   21.00    1.51
   0   3   1  268.51   16.63
   0   3   1  211.10   16.60
   1   3   1   39.74    2.84
  -3  -3  -1   23.31    1.76
  -3  -3  -1   29.15    1.86
   3   3   1   23.38    1.80
  -4  -3  -1    0.80    0.15
  -4  -3  -1    0.26    0.26
  -4  -3  -1    0.94    0.25
  -4  -3  -1    0.72    0.20
   4   3   1    0.90    0.25
   4   3   1    0.79    0.12
   4   3   1    0.67    0.11
  -5  -3  -1   56.23    3.80
  -5  -3  -1   53.51    3.81
  -5  -3  -1   52.07    3.88
  -5  -3  -1   55.05    3.80
  -6  -3  -1   60.94    4.00
  -6  -3  -1   59.10    4.02
  -6  -3  -1   51.98    4.07
  -6  -3  -1   58.08    4.00
   6   3   1   55.71    3.99
   6   3   1   55.57    3.98
  -7  -3  -1   87.19    6.08
  -7  -3  -1   91.63    6.08
  -7  -3  -1   81.52    6.14
   7   3   1   89.32    6.25
   7   3   1   85.27    6.08
  -8  -3  -1   25.36    1.96
  -8  -3  -1   24.76    1.92
  -8  -3  -1   27.76    1.92
  -8  -3  -1   30.48    2.02
  -8  -3  -1   25.22    2.07
   8   3   1   26.40    1.96
  -9  -3  -1   -0.01    0.29
  -9  -3  -1    0.79    0.46
  -9  -3  -1    0.16    0.49
  -9  -3  -1   -0.12    0.26
   9   3   1    0.30    0.39
   9   3   1    0.25    0.82
 -10  -3  -1   20.30    1.56
 -11  -3  -1    0.02    0.27
 -11  -3  -1    0.21    0.18
  11   3   1    0.46    0.70
  10  -4  -1   -0.07    0.36
 -10   4   1   -0.02    0.12
 -10   4   1   -0.20    0.16
 -10   4   1    0.16    0.13
 -10   4   1    0.00    0.15
  -9   4   1    4.07    0.41
  -9   4   1    3.77    0.44
  -9   4   1    4.01    0.56
   8  -4  -1   40.43    2.88
   8  -4  -1   39.02    3.42
  -8   4   1   33.60    2.76
  -8   4   1   42.57    2.97
  -8   4   1   40.15    2.86
   7  -4  -1    3.67    1.15
   7  -4  -1    2.94    0.49
   7  -4  -1    2.94    0.67
   7  -4  -1    3.60    0.56
  -7   4   1    2.51    0.38
  -7   4   1    2.68    0.47
  -7   4   1    3.53    0.37
  -7   4   1    3.03    0.30
   6  -4  -1   34.71    3.01
   6  -4  -1   29.77    2.30
  -6   4   1   30.98    2.23
   5  -4  -1    0.10    0.26
   5  -4  -1   -0.01    0.30
  -5   4   1    0.36    0.11
  -5   4   1    0.88    0.40
  -5   4   1    0.57    0.25
  -5   4   1    0.42    0.28
  -5   4   1    0.49    0.11
  -5   4   1    0.70    0.19
  -4   4   1   30.84    2.14
  -4   4   1   28.03    2.18
  -3   4   1   96.64    6.76
  -2   4   1    9.10    0.90
  -2   4   1    7.21    0.68
   1  -4  -1   12.11    0.89
   0   4   1  162.24   10.12
   0   4   1  128.61   10.09
  -1  -4  -1    0.44    0.21
   1   4   1    0.44    0.19
  -2  -4  -1   31.37    2.10
  -2  -4  -1   27.40    2.10
  -2  -4  -1   31.39    2.21
  -3  -4  -1   13.96    1.04
  -3  -4  -1   14.12    1.04
  -3  -4  -1   15.36    1.18
  -4  -4  -1  164.29   12.03
  -5  -4  -1   17.44    1.33
  -5  -4  -1   17.49    1.44
  -5  -4  -1   18.05    1.31
  -5  -4  -1   17.91    1.31
   6   4   1  362.04   25.18
  -7  -4  -1    9.98    0.82
  -7  -4  -1    8.61    0.93
  -7  -4  -1    8.91    0.81
  -7  -4  -1   10.28    0.90
  -7  -4  -1    9.34    0.81
  -8  -4  -1   27.12    2.37
  -8  -4  -1   33.90    2.25
  -8  -4  -1   31.67    2.33
  -9  -4  -1    5.33    0.63
  -9  -4  -1    5.28    0.61
   9   4   1    7.97    1.45
 -10  -4  -1    3.01    0.53
 -11  -4  -1   20.31    1.51
  10  -5  -1    4.58    0.59
 -10   5   1    4.75    0.38
 -10   5   1    4.00    0.36
  -9   5   1    0.54    0.16
  -9   5   1    0.57    0.19
  -9   5   1    0.62    0.11
  -9   5   1    0.40    0.28
   8  -5  -1   25.69    1.83
  -8   5   1   23.54    1.66
  -8   5   1   23.78    1.66
  -8   5   1   20.24    1.69
   7  -5  -1    7.80    0.81
   7  -5  -1    6.93    0.88
   7  -5  -1    5.98    0.85
   7  -5  -1    8.06    1.36
  -7   5   1    8.45    0.69
  -7   5   1    7.49    0.65
  -7   5   1    8.12    0.66
  -7   5   1    7.83    0.62
  -7   5   1    8.90    0.84
   6  -5  -1  102.88    7.03
   6  -5  -1   86.34    6.54
  -6   5   1   92.09    6.47
  -5   5   1    9.48    0.66
  -5   5   1    7.97    0.65
  -5   5   1    7.37    0.66
  -4   5   1   19.26    1.43
  -4   5   1   21.09    1.44
   1  -5  -1   27.16    1.95
   0  -5  -1   27.51    2.02
   1   5   1  196.12   13.64
   2   5   1   23.85    1.79
  -3  -5  -1   88.16    6.26
  -4  -5  -1   22.62    1.76
  -4  -5  -1   22.43    1.61
  -4  -5  -1   21.87    1.61
   5   5   1  136.93    9.60
  -6  -5  -1   49.47    3.63
  -6  -5  -1   54.21    3.62
  -6  -5  -1   50.85    3.63
  -6  -5  -1   51.31    3.63
  -6  -5  -1   50.33    3.78
   6   5   1   51.65    3.75
  -7  -5  -1   36.31    2.90
  -7  -5  -1   39.21    2.78
  -7  -5  -1   37.68    2.76
  -7  -5  -1   39.53    2.77
  -7  -5  -1   39.50    2.76
  -8  -5  -1   40.55    2.83
  -8  -5  -1   38.81    2.92
  -8  -5  -1   34.11    2.96
  -8  -5  -1   39.26    2.80
  -8  -5  -1   42.45    2.81
  -9  -5  -1   13.20    1.06
  -9  -5  -1   12.82    1.05
 -10  -5  -1   11.94    1.00
  11   5   1    7.50    1.09
  11   5   1    8.08    0.62
  -9   6   1    9.56    0.81
  -9   6   1    9.12    0.72
  -9   6   1   10.16    0.74
   8  -6  -1    5.39    0.71
  -8   6   1    4.15    0.39
  -8   6   1    4.38    0.44
  -8   6   1    4.97    0.47
  -8   6   1    3.76    0.42
  -8   6   1    4.35    0.62
   7  -6  -1    1.14    0.37
   7  -6  -1    0.71    0.38
   7  -6  -1    0.47    0.88
  -7   6   1    0.83    0.22
  -7   6   1    1.15    0.19
  -7   6   1    1.64    0.23
  -7   6   1    1.11    0.18
  -7   6   1    0.61    0.24
  -7   6   1    1.22    0.41
   6  -6  -1   58.24    4.77
  -6   6   1   61.90    4.19
  -6   6   1   58.20    4.19
  -6   6   1   59.79    4.17
  -6   6   1   61.34    4.16
  -6   6   1   62.94    4.28
  -6   6   1   54.99    4.16
  -5   6   1   57.39    3.98
  -5   6   1   55.64    4.01
  -5   6   1   50.90    3.97
  -5   6   1   61.67    4.00
  -5   6   1   59.98    4.08
  -4   6   1   15.68    1.14
  -4   6   1   16.09    1.25
  -4   6   1   15.87    1.15
  -4   6   1   15.45    1.17
  -3   6   1    5.94    0.53
  -3   6   1    6.54    0.61
  -3   6   1    6.78    0.51
  -3   6   1    5.81    0.58
  -3   6   1    5.74    0.49
   1  -6  -1    9.73    0.79
  -2  -6  -1   47.86    3.50
  -3  -6  -1    6.37    0.77
  -4  -6  -1   20.37    1.53
  -4  -6  -1   22.12    1.72
  -4  -6  -1   20.83    1.53
  -5  -6  -1   29.75    2.20
  -5  -6  -1   30.49    2.21
  -5  -6  -1   34.23    2.42
  -5  -6  -1   31.95    2.22
   5   6   1   28.12    2.42
  -6  -6  -1    5.46    0.60
  -6  -6  -1    5.47    0.58
  -6  -6  -1    5.07    0.57
  -6  -6  -1    5.32    0.57
  -6  -6  -1    4.60    0.74
  -7  -6  -1   21.72    1.57
  -7  -6  -1   21.70    1.76
  -7  -6  -1   19.78    1.56
  -7  -6  -1   20.31    1.57
  -7  -6  -1   20.67    1.56
  -8  -6  -1    0.15    0.28
  -8  -6  -1    0.20    0.37
  -8  -6  -1   -0.24    0.62
  -8  -6  -1    0.23    0.25
  -8  -6  -1    0.19    0.27
   8   6   1    0.10    0.34
   8   6   1    1.37    0.64
   9   6   1   26.95    2.44
   9   6   1   29.93    2.15
   9   6   1   33.61    2.27
  10   6   1    7.08    1.17
  10   6   1    8.63    0.68
  11   6   1    4.43    0.80
  11   6   1    4.52    0.37
   9  -7  -1    3.57    0.43
  -9   7   1    3.35    0.40
  -9   7   1    3.14    0.32
  -9   7   1    3.92    0.29
  -9   7   1    4.08    0.31
  -8   7   1   16.43    1.22
  -8   7   1   17.15    1.20
   7  -7  -1    8.61    0.89
  -7   7   1    9.41    0.75
  -7   7   1    8.91    0.91
  -7   7   1   10.68    0.74
  -7   7   1    9.04    0.75
  -7   7   1    9.35    0.72
  -6   7   1   19.83    1.75
  -6   7   1   24.30    1.63
  -6   7   1   23.24    1.63
  -6   7   1   22.63    1.65
  -6   7   1   22.00    1.63
  -6   7   1   23.61    1.65
  -5   7   1   13.83    1.03
  -5   7   1   14.52    1.04
  -5   7   1   13.07    1.01
  -5   7   1   12.69    1.16
  -5   7   1   13.89    1.03
  -5   7   1   13.60    1.04
  -4   7   1    0.94    0.18
  -4   7   1    0.80    0.32
  -4   7   1    1.40    0.22
  -4   7   1    1.53    0.22
  -4   7   1    1.27    0.20
  -4   7   1    1.03    0.17
  -3   7   1    3.39    0.40
  -3   7   1    2.43    0.32
  -3   7   1    2.28    0.30
  -3   7   1    3.03    0.33
  -3   7   1    2.99    0.48
  -3   7   1    2.38    0.39
  -3   7   1    3.19    0.33
  -2   7   1   21.92    1.74
  -2   7   1   22.04    1.52
  -2   7   1   21.55    1.56
  -2   7   1   19.86    1.48
  -2   7   1   20.46    1.49
  -2   7   1   19.33    1.51
  -2   7   1   21.54    1.47
  -2   7   1   19.39    1.49
  -2   7   1   21.14    1.50
   1  -7  -1    4.63    0.54
  -1   7   1    5.86    0.46
  -1   7   1    6.06    0.56
  -1   7   1    6.21    0.51
  -1   7   1    6.89    0.65
  -1   7   1    5.70    0.51
  -1   7   1    5.60    0.47
   0  -7  -1   14.36    1.18
   0   7   1   13.94    1.03
   0   7   1   14.75    1.12
   0   7   1   13.60    1.01
  -1  -7  -1  105.86    7.41
   1   7   1  106.06    8.03
   1   7   1  107.29    7.36
   1   7   1   99.55    7.26
   1   7   1  104.18    7.42
   2   7   1   15.66    1.23
   2   7   1   18.41    1.26
   2   7   1   18.12    1.42
  -3  -7  -1    8.19    0.62
  -3  -7  -1    7.36    0.86
   3   7   1    7.38    0.83
   3   7   1    6.52    0.64
   3   7   1    7.82    0.86
   3   7   1    6.83    0.58
   3   7   1    6.04    0.53
  -4  -7  -1    6.62    0.85
  -4  -7  -1    5.56    0.56
  -4  -7  -1    6.63    0.60
  -4  -7  -1    6.63    0.60
   4   7   1    5.51    0.86
   4   7   1    6.43    0.54
   4   7   1    5.72    0.49
  -5  -7  -1   17.76    1.25
  -5  -7  -1   18.10    1.48
  -5  -7  -1   16.11    1.23
  -5  -7  -1   17.77    1.26
   5   7   1   14.10    1.52
   5   7   1   14.83    1.18
  -6  -7  -1   48.10    3.33
  -6  -7  -1   46.61    3.31
  -6  -7  -1   48.95    3.32
   6   7   1   43.88    3.27
  -7  -7  -1    0.12    0.39
  -7  -7  -1    0.12    0.24
  -7  -7  -1    0.48    0.26
  -7  -7  -1    0.14    0.29
   7   7   1    0.07    0.18
   7   7   1    0.43    0.51
   7   7   1    0.15    0.17
   7   7   1   -0.22    0.35
   8   7   1   10.22    0.82
   8   7   1   10.95    0.99
   8   7   1   10.45    1.20
   9   7   1    8.17    0.66
   9   7   1    7.12    1.05
  10   7   1    6.34    0.52
  10   7   1    6.13    0.89
  -8   8   1    0.19    0.13
  -8   8   1    0.16    0.08
  -8   8   1    0.13    0.12
  -8   8   1    0.16    0.23
  -8   8   1    0.06    0.09
  -7   8   1    3.33    0.33
  -7   8   1    3.35    0.32
  -7   8   1    3.49    0.36
  -7   8   1    2.96    0.54
  -6   8   1    2.36    0.46
  -6   8   1    2.45    0.30
  -6   8   1    2.22    0.30
  -6   8   1    2.41    0.34
  -5   8   1   12.52    0.90
  -5   8   1   11.45    0.90
  -5   8   1   10.39    1.05
  -5   8   1   11.80    0.89
  -5   8   1   10.97    0.88
  -5   8   1   11.36    0.87
  -4   8   1    0.48    0.35
  -4   8   1    0.85    0.21
  -4   8   1    0.55    0.16
  -4   8   1    0.68    0.17
  -4   8   1    0.91    0.19
  -4   8   1    0.80    0.22
  -4   8   1    0.77    0.20
  -3   8   1    0.04    0.14
  -3   8   1    0.41    0.31
  -3   8   1    0.25    0.17
  -3   8   1    0.46    0.46
  -3   8   1    0.38    0.19
  -3   8   1    0.33    0.17
  -3   8   1    0.25    0.20
  -3   8   1    0.38    0.29
  -3   8   1    0.35    0.17
  -2   8   1    4.93    0.51
  -2   8   1    4.87    0.60
  -2   8   1    5.15    0.45
  -2   8   1    5.51    0.52
  -2   8   1    4.97    0.44
  -2   8   1    4.96    0.46
  -2   8   1    4.66    0.56
  -2   8   1    5.08    0.49
  -1   8   1    3.24    0.51
  -1   8   1    3.43    0.44
  -1   8   1    4.76    1.19
  -1   8   1    2.57    0.61
  -1   8   1    3.47    0.44
  -1   8   1    2.82    0.42
  -1   8   1    4.53    0.52
  -1   8   1    3.52    0.34
  -1   8   1    4.92    0.90
  -1   8   1    3.72    0.36
  -1   8   1    3.57    0.44
   0  -8  -1   40.30    2.88
   0   8   1   39.51    2.74
   0   8   1   36.37    2.77
   0   8   1   40.32    2.81
   0   8   1   37.55    2.72
   0   8   1   39.06    2.71
   0   8   1   38.42    2.71
  -1  -8  -1    0.90    0.38
   1   8   1    0.69    0.74
   1   8   1    0.49    0.46
   1   8   1    0.73    0.46
   1   8   1    0.35    0.33
   1   8   1    0.92    0.17
  -2  -8  -1    0.79    0.40
   2   8   1    0.81    0.66
   2   8   1    0.57    0.44
   2   8   1    0.36    0.45
   2   8   1    0.76    0.17
  -3  -8  -1    4.82    0.70
   3   8   1    4.49    0.40
   3   8   1    4.82    0.77
   3   8   1    4.35    0.55
   3   8   1    5.56    0.91
   3   8   1    5.14    0.48
  -4  -8  -1    0.03    0.39
  -4  -8  -1    0.58    0.27
  -4  -8  -1    0.40    0.21
  -4  -8  -1    0.30    0.24
   4   8   1    0.51    0.17
   4   8   1   -0.15    0.45
   4   8   1    0.18    0.15
   4   8   1    0.31    0.14
  -5  -8  -1   58.16    3.75
  -5  -8  -1   57.82    3.75
  -5  -8  -1   48.11    3.74
   5   8   1   53.32    3.71
   5   8   1   48.46    3.86
  -6  -8  -1    4.81    0.70
  -6  -8  -1    5.13    0.58
  -6  -8  -1    4.92    0.56
  -6  -8  -1    5.35    0.61
   6   8   1    5.64    0.48
   6   8   1    6.41    0.80
  -7  -8  -1  122.67    8.67
   7   8   1  119.01    8.76
   7   8   1  132.06    8.67
  -8  -8  -1    2.90    0.39
   8   8   1    2.73    0.48
   9   8   1   62.68    4.06
   9   8   1   53.76    4.15
  10   8   1   11.21    0.99
  10   8   1   12.48    0.86
  -7   9   1    0.50    0.13
  -7   9   1    0.32    0.13
  -7   9   1    0.38    0.25
  -7   9   1    0.27    0.09
  -6   9   1   28.63    1.90
  -6   9   1   25.31    2.00
  -6   9   1   26.45    1.90
  -5   9   1    8.00    0.71
  -5   9   1   10.14    0.74
  -5   9   1    8.64    0.70
  -5   9   1   10.70    0.74
  -5   9   1    8.10    0.90
  -4   9   1    0.16    0.21
  -4   9   1    0.17    0.35
  -4   9   1    0.06    0.17
  -4   9   1    0.35    0.18
  -4   9   1    0.05    0.12
  -4   9   1    0.15    0.17
  -4   9   1    0.27    0.17
  -3   9   1    3.36    0.57
  -3   9   1    2.92    0.35
  -3   9   1    3.61    0.37
  -3   9   1    3.78    0.42
  -3   9   1    3.01    0.47
  -3   9   1    3.33    0.37
  -3   9   1    3.06    0.46
  -3   9   1    2.86    0.48
  -2   9   1    8.08    0.62
  -2   9   1    7.20    0.67
  -2   9   1    7.95    0.72
  -2   9   1    6.22    0.76
  -2   9   1    6.98    0.68
  -2   9   1    8.23    0.69
  -2   9   1    8.53    1.05
  -2   9   1    7.53    0.61
  -1   9   1   62.87    4.68
  -1   9   1   68.50    4.62
  -1   9   1   66.04    4.61
  -1   9   1   64.70    4.60
  -1   9   1   71.19    4.69
  -1   9   1   67.46    4.61
  -1   9   1   62.09    4.77
   0   9   1    0.54    0.41
   0   9   1    0.24    0.17
   0   9   1    0.26    0.16
   0   9   1    0.63    0.92
   0   9   1    0.79    0.20
   0   9   1    0.58    0.16
   0   9   1    0.44    0.17
   0   9   1    0.52    0.52
   0   9   1    0.38    0.52
   1   9   1  205.48   14.39
   1   9   1  219.03   14.63
   1   9   1  189.28   14.14
   1   9   1  201.25   14.12
   1   9   1  202.22   14.13
   1   9   1  208.80   14.28
  -2  -9  -1   -0.17    0.35
   2   9   1   -0.53    0.50
   2   9   1    0.53    0.71
   2   9   1    0.35    0.14
   2   9   1    0.27    0.50
   2   9   1    0.05    0.16
   3   9   1   32.27    2.64
   3   9   1   35.14    2.41
   3   9   1   34.34    2.39
  -4  -9  -1    4.75    0.51
  -4  -9  -1    3.92    0.61
   4   9   1    4.16    0.39
   4   9   1    3.15    0.64
   4   9   1    4.96    0.47
  -5  -9  -1   78.59    5.20
   5   9   1   69.14    5.30
   5   9   1   71.23    5.19
   5   9   1   77.55    5.16
  -6  -9  -1   29.05    2.22
   6   9   1   32.74    2.23
   7   9   1   10.98    1.29
   7   9   1   14.78    1.13
   7   9   1   14.88    1.02
   8   9   1   11.25    0.78
   8   9   1    8.72    1.05
  -6  10   1    0.11    0.09
  -6  10   1    0.34    0.24
  -6  10   1    0.29    0.11
  -6  10   1    0.30    0.11
  -5  10   1   12.58    0.81
  -5  10   1   10.22    0.93
  -5  10   1   10.48    0.80
  -5  10   1    9.76    0.80
  -4  10   1    1.90    0.28
  -4  10   1    1.79    0.27
  -4  10   1    2.43    0.39
  -4  10   1    1.87    0.38
  -3  10   1    1.04    0.19
  -3  10   1    0.69    0.18
  -3  10   1    0.79    0.23
  -3  10   1    1.43    0.23
  -3  10   1    0.98    0.34
  -2  10   1    8.76    0.64
  -2  10   1    7.40    0.99
  -2  10   1    6.99    0.68
  -2  10   1    7.91    0.61
  -2  10   1    7.41    0.66
  -2  10   1    6.85    0.77
  -1  10   1    0.20    0.17
  -1  10   1    0.57    0.17
  -1  10   1    0.46    0.16
  -1  10   1    0.44    0.50
  -1  10   1    0.85    0.17
  -1  10   1    0.51    0.31
  -1  10   1    0.06    0.21
   0  10   1   13.12    1.05
   0  10   1   13.56    1.01
   0  10   1   13.96    0.97
   0  10   1   11.20    1.37
   0  10   1   13.37    1.02
   1  10   1  135.17    9.41
   1  10   1  135.21    9.40
   1  10   1  133.27    9.57
   1  10   1  138.23    9.42
   1  10   1  134.66    9.41
   1  10   1  137.61    9.53
  -2 -10  -1   36.26    2.60
   2  10   1   35.96    2.42
   2  10   1   31.77    2.46
   2  10   1   32.98    2.70
   2  10   1   35.13    2.44
  -3 -10  -1   39.25    2.80
  -3 -10  -1   39.92    2.86
   3  10   1   36.90    2.66
   3  10   1   38.51    2.93
   3  10   1   35.56    2.69
   3  10   1   37.44    2.65
   4  10   1   22.19    1.51
   4  10   1   20.80    1.59
   4  10   1   20.18    1.87
  -5 -10  -1    0.39    0.27
   5  10   1    0.59    0.20
   5  10   1    0.86    0.17
   5  10   1    1.16    0.21
   5  10   1    0.88    0.49
   6  10   1   12.08    1.34
   6  10   1   14.91    1.02
   6  10   1   14.35    1.12
  -7 -10  -1    0.20    0.24
   7  10   1    0.15    0.14
   7  10   1    0.32    0.39
   8  10   1    2.24    0.40
   8  10   1    2.61    0.27
  -5  11   1    0.39    0.21
  -5  11   1    0.43    0.10
  -5  11   1    0.46    0.10
  -4  11   1    4.98    0.42
  -4  11   1    4.26    0.50
  -4  11   1    4.92    0.41
  -4  11   1    4.14    0.38
  -3  11   1    1.58    0.30
  -3  11   1    1.37    0.17
  -3  11   1    1.52    0.24
  -3  11   1    1.46    0.22
  -2  11   1    0.78    0.21
  -2  11   1    1.15    0.29
  -2  11   1    0.97    0.16
  -2  11   1    1.27    0.41
  -2  11   1    1.54    0.26
  -1  11   1    9.89    0.72
  -1  11   1    9.61    0.78
  -1  11   1    8.58    1.04
  -1  11   1    9.51    0.74
   0  11   1   12.69    1.36
   0  11   1   14.07    1.03
   0  11   1   13.51    1.07
   0  11   1   14.64    1.02
   0  11   1   14.84    1.08
   1  11   1   -0.18    0.16
   1  11   1   -0.19    0.19
   1  11   1   -0.24    0.49
   2  11   1    6.69    0.59
   2  11   1    6.05    1.04
   3  11   1    0.92    0.17
   3  11   1    0.63    0.20
   3  11   1    0.07    0.50
   4  11   1    0.18    0.13
   4  11   1    0.51    0.18
   4  11   1   -0.08    0.16
   4  11   1    0.10    0.47
   5  11   1    4.23    0.35
   5  11   1    2.92    0.57
   5  11   1    3.86    0.52
  -6 -11  -1    0.69    0.21
   6  11   1    0.94    0.40
   7  11   1    2.35    0.42
   7  11   1    3.30    0.28
  -3  12   1    5.04    0.40
  -3  12   1    5.18    0.43
  -2  12   1    2.10    0.23
  -2  12   1    2.17    0.25
  -1  12   1   -0.05    0.16
  -1  12   1    0.54    0.14
  -1  12   1    0.30    0.13
  -1  12   1    0.08    0.31
   0  12   1    1.30    0.19
   0  12   1    1.13    0.40
   1  12   1   17.17    1.17
   1  12   1   15.90    1.14
   1  12   1   15.21    1.37
   1  12   1   15.57    1.17
   2  12   1    2.43    0.37
   2  12   1    3.19    0.30
   2  12   1    3.45    0.41
   3  12   1    0.41    0.13
   3  12   1    0.47    0.16
   3  12   1    0.26    0.40
   4  12   1    5.09    0.41
   4  12   1    5.92    0.50
   4  12   1    4.05    0.79
   5  12   1    2.19    0.22
   5  12   1    1.80    0.40
   0  13   1    4.42    0.41
   0  13   1    5.10    0.37
   1  13   1    9.51    0.71
   1  13   1   10.45    0.70
   1  13   1    8.72    0.83
   2  13   1   17.34    1.36
   2  13   1   18.24    1.26
   4  12  -2    0.10    0.10
   4  12  -2   -0.01    0.12
   4  12  -2    0.17    0.31
   3  12  -2    5.88    0.45
   3  12  -2    5.55    0.54
   3  12  -2    6.11    0.76
   2  12  -2    0.37    0.14
   2  12  -2    0.55    0.37
   2  12  -2    0.73    0.44
   1  12  -2    2.12    0.44
   1  12  -2    1.96    0.35
   1  12  -2    3.12    0.29
   0  12  -2    2.06    0.38
   0  12  -2    2.34    0.36
   0  12  -2    2.57    0.43
  -1  12  -2    3.08    0.40
  -1  12  -2    3.24    0.61
  -2  12  -2    0.45    0.17
  -2  12  -2    0.82    0.16
  -3  12  -2    3.29    0.36
   6  11  -2    1.50    0.17
   5  11  -2    0.18    0.37
   5  11  -2    0.18    0.12
   4  11  -2   -0.05    0.13
   4  11  -2    0.07    0.40
   4  11  -2    0.42    0.49
   3  11  -2    1.24    0.53
   3  11  -2    1.63    0.49
   3  11  -2    1.94    0.26
   2  11  -2    0.95    0.49
   2  11  -2    1.04    0.48
   2  11  -2    1.63    0.42
   2  11  -2    1.27    0.71
   1  11  -2    0.69    0.19
   1  11  -2    0.41    0.46
   1  11  -2    1.08    0.41
   1  11  -2    0.13    0.69
   1  11  -2    0.73    0.43
   1  11  -2    0.17    0.23
   0  11  -2    3.84    0.51
   0  11  -2    4.91    0.87
   0  11  -2    3.94    0.55
   0  11  -2    3.04    0.57
   0  11  -2    3.41    0.89
  -1  11  -2    1.13    0.41
  -1  11  -2    1.60    0.27
  -1  11  -2    0.99    0.74
  -1  11  -2    1.88    0.47
  -1  11  -2    1.00    0.41
  -1  11  -2    1.13    0.19
  -2  11  -2    0.60    0.16
  -2  11  -2    0.58    0.17
  -2  11  -2    0.52    0.39
  -2  11  -2    0.28    0.24
  -2  11  -2    0.77    0.20
  -3  11  -2   16.10    1.19
  -3  11  -2   16.32    1.14
  -3  11  -2   15.06    1.16
  -4  11  -2   14.84    1.04
  -4  11  -2   12.79    1.07
  -5  11  -2   14.80    1.07
  -6  11  -2    4.85    0.39
   7  10  -2    0.14    0.17
   7  10  -2    0.33    0.37
  -7 -10   2    0.09    0.21
   6  10  -2    1.31    0.43
   6  10  -2    1.24    0.17
  -6 -10   2    1.03    0.26
   5  10  -2   16.53    1.37
   5  10  -2   16.83    1.10
   5  10  -2   13.34    1.19
  -5 -10   2   13.99    1.14
   4  10  -2    5.02    0.44
   4  10  -2    7.46    1.30
   4  10  -2    4.27    0.86
  -4 -10   2    4.65    0.50
   3  10  -2   18.02    1.53
   3  10  -2   16.25    1.54
   3  10  -2   16.78    1.35
   3  10  -2   19.55    1.86
   2  10  -2   17.73    1.63
   2  10  -2   16.45    1.60
   2  10  -2   17.87    1.91
   2  10  -2   20.87    1.38
   2  10  -2   20.32    1.42
  -2 -10   2   19.31    1.63
   1  10  -2    7.10    0.57
   1  10  -2    5.90    0.84
   1  10  -2    7.99    1.04
   1  10  -2    6.44    0.80
   1  10  -2    6.60    0.67
   1  10  -2    5.49    1.01
  -1 -10   2    6.75    0.82
   0  10  -2    2.08    0.32
   0  10  -2    2.31    0.49
   0  10  -2    3.27    0.38
   0  10  -2    2.79    0.56
   0  10  -2    2.10    0.81
   0  10  -2    3.25    0.52
  -1  10  -2    1.23    0.22
  -1  10  -2    1.40    0.82
  -1  10  -2    1.46    0.21
  -1  10  -2    1.51    0.43
  -1  10  -2    0.89    0.28
  -1  10  -2    0.83    0.42
  -1  10  -2    1.71    0.34
  -2  10  -2    1.71    0.48
  -2  10  -2    1.15    0.31
  -2  10  -2    0.49    0.38
  -2  10  -2    1.28    0.25
  -2  10  -2    0.98    0.19
  -2  10  -2    0.97    0.87
  -2  10  -2    0.41    0.32
  -3  10  -2   24.86    1.93
  -3  10  -2   30.58    2.62
  -3  10  -2   28.64    1.98
  -3  10  -2   25.74    1.96
  -3  10  -2   31.03    2.19
  -3  10  -2   23.66    2.02
  -3  10  -2   27.95    2.10
  -3  10  -2   27.31    1.94
  -3  10  -2   29.15    2.15
  -4  10  -2    9.92    1.04
  -4  10  -2   13.26    0.89
  -4  10  -2   10.66    0.90
  -4  10  -2   13.28    0.90
  -4  10  -2   10.89    0.94
  -5  10  -2    4.73    0.67
  -5  10  -2    5.27    0.45
  -5  10  -2    4.27    0.44
  -6  10  -2    3.18    0.34
  -6  10  -2    3.62    0.54
  -6  10  -2    3.49    0.34
  -7  10  -2    2.61    0.41
  -7  10  -2    3.16    0.29
  -7  10  -2    2.73    0.28
   8   9  -2    0.68    0.36
   8   9  -2    0.67    0.19
  -8  -9   2    0.45    0.22
   7   9  -2    4.88    0.41
   7   9  -2    4.63    0.65
   7   9  -2    5.69    0.90
  -7  -9   2    5.00    0.56
   6   9  -2    1.98    0.70
   6   9  -2    2.95    0.33
   6   9  -2    3.17    0.55
  -6  -9   2    3.78    0.49
   5   9  -2   20.95    1.67
   5   9  -2   21.25    1.41
   5   9  -2   16.89    1.50
  -5  -9   2   19.70    1.46
   4   9  -2    1.10    0.42
   4   9  -2    1.25    0.70
   4   9  -2    1.34    0.50
   4   9  -2    1.25    0.20
  -4  -9   2    0.93    0.23
  -4  -9   2    0.68    0.44
   3   9  -2   31.71    2.02
   3   9  -2   27.56    2.44
   3   9  -2   28.51    2.21
   3   9  -2   26.46    2.07
   3   9  -2   27.63    2.25
  -3  -9   2   28.01    2.30
   2   9  -2   11.14    0.79
   2   9  -2   10.91    1.05
   2   9  -2   10.72    0.86
   2   9  -2    8.69    1.10
   2   9  -2    9.76    1.03
   2   9  -2    9.42    1.31
  -2  -9   2    9.93    1.10
   1   9  -2   14.99    1.61
   1   9  -2   15.41    1.36
   1   9  -2   15.47    1.11
   1   9  -2   14.67    1.16
   1   9  -2   16.18    1.33
   1   9  -2   14.73    1.31
  -1  -9   2   13.47    1.35
   0   9  -2   14.84    1.23
   0   9  -2   15.85    1.71
   0   9  -2   14.60    1.20
   0   9  -2   17.06    1.36
   0   9  -2   15.73    1.16
   0   9  -2   15.60    1.14
   0   9  -2   15.85    1.34
   0   9  -2   14.92    1.28
   0   9  -2   17.19    1.41
  -1   9  -2    1.15    0.37
  -1   9  -2    1.07    0.20
  -1   9  -2    0.84    0.74
  -1   9  -2    0.57    0.31
  -1   9  -2    1.30    0.48
  -1   9  -2    1.72    0.43
  -1   9  -2    0.98    0.32
  -1   9  -2    1.23    0.40
  -1   9  -2    0.74    0.26
  -1   9  -2    1.45    0.22
   1  -9   2    0.83    0.33
  -2   9  -2    4.94    0.60
  -2   9  -2    6.13    0.50
  -2   9  -2    4.30    1.03
  -2   9  -2    5.43    0.72
  -2   9  -2    5.38    0.52
  -2   9  -2    5.71    0.60
  -2   9  -2    4.99    0.62
  -2   9  -2    6.27    0.75
  -2   9  -2    3.76    0.69
  -3   9  -2   19.99    1.62
  -3   9  -2   22.37    1.64
  -3   9  -2   21.70    1.69
  -3   9  -2   24.32    1.66
  -3   9  -2   22.25    1.68
  -3   9  -2   25.10    1.89
  -3   9  -2   22.72    1.66
  -3   9  -2   22.51    1.62
  -3   9  -2   19.82    1.76
  -3   9  -2   23.06    1.83
  -3   9  -2   27.00    2.41
  -4   9  -2    1.59    0.22
  -4   9  -2    1.90    0.28
  -4   9  -2    1.88    0.29
  -4   9  -2    1.55    0.28
  -4   9  -2    1.25    0.25
  -4   9  -2    1.50    0.48
  -4   9  -2    1.84    0.29
  -4   9  -2    2.10    0.48
  -5   9  -2   13.14    1.03
  -5   9  -2   13.20    1.03
  -5   9  -2   14.34    1.03
  -5   9  -2   13.98    1.04
  -5   9  -2   12.76    1.22
  -6   9  -2   14.58    1.05
  -6   9  -2   13.00    1.03
  -6   9  -2   14.81    1.05
  -6   9  -2   13.21    1.22
  -6   9  -2   13.84    1.04
  -7   9  -2    7.44    0.57
  -7   9  -2    6.51    0.56
  -7   9  -2    7.30    0.59
  -7   9  -2    6.96    0.77
  -8   9  -2    0.39    0.14
  -8   9  -2    0.00    0.23
  -8   9  -2    0.22    0.10
  -8   9  -2    0.17    0.17
  -8   9  -2    0.08    0.10
  -8   9  -2    0.47    0.12
  -9  -8   2   29.25    2.06
   8   8  -2    4.63    0.71
   8   8  -2    3.63    0.32
   8   8  -2    3.88    0.58
  -8  -8   2    3.52    0.49
   7   8  -2   61.19    4.29
   7   8  -2   60.53    4.46
   7   8  -2   64.88    4.42
   7   8  -2   64.08    4.35
  -7  -8   2   57.96    4.33
   6   8  -2    0.17    0.17
   6   8  -2    0.22    0.41
   6   8  -2   -0.02    0.58
   6   8  -2    0.27    0.47
  -6  -8   2    0.41    0.26
   5   8  -2   17.55    1.60
   5   8  -2   18.53    1.54
   5   8  -2   19.71    1.37
   5   8  -2   17.01    1.70
  -5  -8   2   18.95    1.44
  -5  -8   2   18.30    1.44
  -5  -8   2   22.42    1.75
  -5  -8   2   20.09    1.42
   4   8  -2   35.11    2.55
   4   8  -2   29.16    2.44
   4   8  -2   32.70    2.65
   4   8  -2   35.38    2.29
  -4  -8   2   29.91    2.31
  -4  -8   2   34.97    2.60
  -4  -8   2   31.53    2.33
   3   8  -2   63.33    4.07
   3   8  -2   53.93    4.15
   3   8  -2   53.58    4.07
   3   8  -2   51.55    3.98
   3   8  -2   52.49    3.89
  -3  -8   2   57.18    3.89
  -3  -8   2   56.78    4.11
   2   8  -2    0.24    0.29
   2   8  -2    0.54    0.49
   2   8  -2    0.28    0.32
   2   8  -2   -0.09    0.16
   2   8  -2    0.04    0.19
   2   8  -2    0.29    0.15
   2   8  -2    0.28    0.33
  -2  -8   2    0.34    0.44
   1   8  -2   29.97    2.35
   1   8  -2   29.48    2.00
   1   8  -2   25.10    2.01
   1   8  -2   30.35    2.17
   1   8  -2   28.63    2.15
   1   8  -2   32.15    2.16
   1   8  -2   26.82    2.02
  -1  -8   2   24.59    2.21
   0   8  -2   28.05    2.00
   0   8  -2   27.16    2.05
   0   8  -2   28.41    2.12
   0   8  -2   27.20    2.13
   0   8  -2   26.37    2.02
   0   8  -2   29.39    2.40
   0   8  -2   29.29    2.02
   0   8  -2   30.61    2.16
   0   8  -2   32.37    2.16
   0  -8   2   25.23    2.20
  -1   8  -2   38.32    2.61
  -1   8  -2   32.94    2.49
  -1   8  -2   38.43    2.61
  -1   8  -2   40.48    2.92
  -1   8  -2   32.62    2.45
  -1   8  -2   33.53    2.64
  -1   8  -2   36.41    2.47
  -1   8  -2   35.25    2.56
  -1   8  -2   31.58    2.47
   1  -8   2   31.91    2.65
  -2   8  -2    4.78    0.55
  -2   8  -2    5.33    0.97
  -2   8  -2    4.81    0.59
  -2   8  -2    5.43    0.48
  -2   8  -2    5.06    0.63
  -2   8  -2    4.97    0.64
  -2   8  -2    4.76    0.53
  -2   8  -2    3.82    0.53
  -2   8  -2    4.72    0.44
  -2   8  -2    4.93    0.52
  -2   8  -2    4.34    0.67
   2  -8   2    4.65    0.64
  -3   8  -2  131.97    9.62
  -3   8  -2  144.80    9.71
  -3   8  -2  147.28    9.70
  -3   8  -2  128.57    9.64
  -3   8  -2  153.86    9.71
  -3   8  -2  128.98    9.62
  -3   8  -2  148.83    9.73
  -3   8  -2  126.71    9.63
  -4   8  -2   56.92    3.81
  -4   8  -2   58.31    3.79
  -4   8  -2   53.11    3.80
  -4   8  -2   48.62    3.77
  -4   8  -2   48.38    3.90
  -4   8  -2   54.49    3.83
  -4   8  -2   55.35    3.79
  -4   8  -2   55.56    3.77
  -4   8  -2   54.95    3.80
  -5   8  -2   55.86    4.06
  -5   8  -2   52.44    4.20
  -5   8  -2   61.18    4.10
  -5   8  -2   55.88    4.08
  -5   8  -2   56.48    4.10
  -5   8  -2   58.54    4.11
  -5   8  -2   63.56    4.08
  -5   8  -2   61.31    4.06
  -6   8  -2    0.49    0.16
  -6   8  -2    0.34    0.19
  -6   8  -2    0.44    0.25
  -6   8  -2    0.22    0.16
  -6   8  -2    1.02    0.26
  -6   8  -2    0.33    0.47
  -6   8  -2    0.54    0.23
  -6   8  -2    0.57    0.18
   6  -8   2    0.51    0.74
  -7   8  -2    5.99    0.82
  -7   8  -2    6.06    0.53
  -7   8  -2    7.04    0.59
  -7   8  -2    6.43    0.55
  -7   8  -2    6.72    0.56
  -8   8  -2    4.14    0.41
  -8   8  -2    3.78    0.37
  -8   8  -2    3.49    0.37
  -8   8  -2    3.99    0.35
  -8   8  -2    3.37    0.60
  -9   8  -2    0.31    0.10
  -9   8  -2    0.33    0.13
  -9   8  -2    0.31    0.22
  -9   8  -2    0.26    0.09
  -9   8  -2    0.20    0.10
   9   7  -2   14.82    1.39
   9   7  -2   14.84    1.30
   8   7  -2   11.84    0.88
   8   7  -2   11.69    1.25
   8   7  -2   13.33    1.45
   7   7  -2   38.95    2.77
   7   7  -2   39.31    3.00
   7   7  -2   34.34    2.87
   7   7  -2   40.79    2.68
  -7  -7   2   37.52    2.73
   6   7  -2   10.16    0.74
   6   7  -2    9.06    1.30
   6   7  -2    7.39    1.17
   6   7  -2    8.70    1.05
  -6  -7   2    9.75    1.14
  -6  -7   2    9.47    0.88
  -6  -7   2    9.84    0.88
  -6  -7   2    9.15    0.87
  -6  -7   2   11.01    0.85
   5   7  -2    0.61    0.45
   5   7  -2    0.74    0.37
   5   7  -2    0.59    0.55
   5   7  -2    0.82    0.17
  -5  -7   2    0.76    0.33
  -5  -7   2    0.97    0.26
  -5  -7   2    0.57    0.48
  -5  -7   2    1.41    0.34
  -5  -7   2    0.90    0.29
   4   7  -2    9.10    1.05
   4   7  -2    9.92    0.94
   4   7  -2    8.54    0.65
   4   7  -2    7.80    0.98
  -4  -7   2    8.11    0.73
  -4  -7   2    7.96    0.74
  -4  -7   2    8.64    1.06
  -4  -7   2    8.11    0.77
  -4  -7   2    7.95    0.72
   3   7  -2   19.62    1.87
   3   7  -2   22.75    1.82
   3   7  -2   25.01    1.80
   3   7  -2   23.54    1.62
  -3  -7   2   21.95    1.89
  -3  -7   2   22.21    1.65
  -3  -7   2   22.33    1.65
  -3  -7   2   24.35    1.67
   2   7  -2    1.34    0.37
   2   7  -2    1.28    0.44
   2   7  -2    1.02    0.30
   2   7  -2    1.02    0.38
   2   7  -2    0.85    0.27
   2   7  -2    1.43    0.22
  -2  -7   2    1.05    0.24
   1   7  -2   80.68    5.60
   1   7  -2   74.54    5.53
   1   7  -2   85.85    5.65
   1   7  -2   80.06    5.75
   1   7  -2   70.92    5.65
   1   7  -2   83.86    5.65
   1   7  -2   82.08    5.52
  -1  -7   2   78.40    5.53
   0   7  -2    1.33    0.29
   0   7  -2    1.12    0.31
   0   7  -2    1.53    0.32
   0   7  -2    0.97    0.36
   0   7  -2    0.78    0.17
   0   7  -2    1.65    0.29
   0   7  -2    1.12    0.26
   0   7  -2    1.94    0.52
   0   7  -2    1.22    0.17
   0  -7   2    0.83    0.21
  -1   7  -2  102.07    7.35
  -1   7  -2  106.52    7.28
  -1   7  -2   94.73    7.27
  -1   7  -2  112.31    7.44
  -1   7  -2  111.48    7.35
  -1   7  -2  111.99    7.38
  -1   7  -2   95.60    7.27
  -2   7  -2   10.09    0.76
  -2   7  -2    9.18    0.71
  -2   7  -2    7.27    1.02
  -2   7  -2    9.83    1.02
  -2   7  -2    9.04    0.76
  -2   7  -2    8.16    0.68
  -2   7  -2    8.50    0.74
  -2   7  -2   10.49    0.84
  -2   7  -2    8.87    0.75
   2  -7   2    7.11    0.86
  -3   7  -2    1.96    0.32
  -3   7  -2    2.27    0.34
  -3   7  -2    2.51    0.31
  -3   7  -2    2.34    0.34
  -3   7  -2    2.38    0.55
  -3   7  -2    1.92    0.39
  -3   7  -2    3.45    0.81
  -3   7  -2    3.05    0.43
  -3   7  -2    1.76    0.40
  -3   7  -2    2.48    0.36
  -3   7  -2    2.31    0.31
  -3   7  -2    2.84    0.43
  -4   7  -2   20.99    1.82
  -4   7  -2   22.40    1.56
  -4   7  -2   19.19    1.70
  -4   7  -2   22.10    1.58
  -4   7  -2   20.78    1.59
  -4   7  -2   22.60    1.77
  -4   7  -2   20.95    1.59
  -4   7  -2   24.07    1.61
  -5   7  -2    0.53    0.44
  -5   7  -2    0.12    0.21
  -5   7  -2    0.29    0.19
  -5   7  -2    0.07    0.38
  -5   7  -2    0.36    0.16
  -5   7  -2    0.21    0.22
  -5   7  -2    0.12    0.17
  -5   7  -2    0.17    0.21
  -5   7  -2    0.20    0.17
  -5   7  -2    0.38    0.24
  -5   7  -2    0.45    0.37
   5  -7   2   -0.29    0.69
  -6   7  -2   19.89    1.41
  -6   7  -2   18.60    1.40
  -6   7  -2   17.42    1.60
  -6   7  -2   20.94    1.43
  -6   7  -2   18.75    1.43
  -6   7  -2   19.27    1.42
  -6   7  -2   19.28    1.42
  -7   7  -2    0.43    0.17
  -7   7  -2    0.44    0.23
  -7   7  -2    0.94    0.24
  -7   7  -2    0.43    0.18
  -7   7  -2    0.55    0.18
  -7   7  -2    0.49    0.22
  -7   7  -2    0.46    0.46
   7  -7   2    0.61    0.66
  -8   7  -2    1.06    0.41
  -8   7  -2    1.00    0.18
  -8   7  -2    0.83    0.21
  -8   7  -2    0.58    0.21
  -8   7  -2    0.99    0.17
  -8   7  -2    0.67    0.24
  -9   7  -2   21.66    1.45
  -9   7  -2   19.20    1.47
  -9   7  -2   21.86    1.45
  -9   7  -2   19.00    1.55
  -9   7  -2   19.58    1.47
 -10   7  -2    0.69    0.12
 -10   7  -2    0.61    0.20
 -10   7  -2    0.69    0.14
  10   6  -2   10.68    0.94
   9   6  -2    0.59    0.77
   9   6  -2    0.58    0.43
   9   6  -2    0.79    0.26
   8   6  -2    4.91    0.96
   8   6  -2    5.96    0.46
   8   6  -2    4.72    1.01
  -8  -6   2    4.17    0.58
   7   6  -2    7.26    1.04
   7   6  -2    7.28    1.40
   7   6  -2    7.31    0.86
  -7  -6   2    6.78    0.74
  -7  -6   2    7.48    0.75
  -7  -6   2    8.59    0.80
  -7  -6   2    8.54    0.74
  -7  -6   2    7.84    0.92
   6   6  -2   11.87    1.40
   6   6  -2   13.38    0.94
   6   6  -2   10.66    1.27
   6   6  -2   11.03    1.22
  -6  -6   2   12.86    1.29
  -6  -6   2   11.33    1.06
  -6  -6   2   12.22    1.04
  -6  -6   2   13.56    1.01
  -6  -6   2   12.98    1.04
   5   6  -2    7.68    1.03
   5   6  -2    7.27    0.60
   5   6  -2    7.92    0.92
  -5  -6   2    7.78    0.75
  -5  -6   2    7.76    1.04
  -5  -6   2    7.94    0.71
  -5  -6   2    7.22    0.72
  -5  -6   2    7.32    0.71
   4   6  -2   32.26    2.25
   4   6  -2   34.74    2.44
  -4  -6   2   29.94    2.28
  -4  -6   2   33.13    2.31
  -4  -6   2   31.83    2.51
  -4  -6   2   30.83    2.28
  -4  -6   2   31.58    2.29
   3   6  -2    3.09    0.46
   3   6  -2    1.58    0.35
  -3  -6   2    2.19    0.27
  -3  -6   2    1.99    0.26
  -3  -6   2    2.48    0.32
  -2  -6   2   36.45    2.57
  -1  -6   2   52.98    3.70
   0  -6   2    7.62    0.61
  -1   6  -2    5.76    0.79
  -2   6  -2    1.51    0.47
  -3   6  -2    1.43    0.21
  -3   6  -2    1.25    0.23
  -3   6  -2    2.17    0.51
  -4   6  -2    3.05    0.35
  -4   6  -2    2.84    0.35
  -4   6  -2    2.61    0.45
  -4   6  -2    3.17    0.56
  -4   6  -2    1.93    0.40
  -4   6  -2    2.38    0.32
  -4   6  -2    3.09    0.36
  -4   6  -2    2.05    0.30
  -5   6  -2   28.77    2.15
  -5   6  -2   24.72    1.95
  -5   6  -2   27.26    1.92
  -5   6  -2   25.74    2.07
  -5   6  -2   29.82    1.96
  -6   6  -2    0.24    0.39
  -6   6  -2    0.34    0.19
  -6   6  -2    0.63    0.24
  -6   6  -2    0.38    0.15
  -6   6  -2    0.57    0.44
  -6   6  -2    0.66    0.17
  -6   6  -2    0.53    0.23
  -6   6  -2   -0.10    0.22
  -6   6  -2    0.37    0.24
   6  -6   2    0.29    0.73
  -7   6  -2   20.30    1.56
  -7   6  -2   18.42    1.37
  -7   6  -2   18.78    1.35
  -7   6  -2   17.26    1.34
  -7   6  -2   17.54    1.36
  -7   6  -2   18.23    1.38
  -8   6  -2    7.20    0.64
  -8   6  -2    5.52    0.59
  -8   6  -2    6.08    0.54
  -8   6  -2    6.39    0.54
  -8   6  -2    5.65    0.58
  -9   6  -2   14.55    1.08
  -9   6  -2   15.66    1.23
  -9   6  -2   13.54    1.09
  -9   6  -2   14.73    1.11
 -10   6  -2    5.43    0.42
 -10   6  -2    4.93    0.54
 -10   6  -2    5.32    0.45
 -10   6  -2    5.17    0.45
  10  -6   2    4.31    0.57
  10   5  -2    1.03    0.67
   9   5  -2   95.70    6.75
   9   5  -2   89.82    6.57
   8   5  -2   62.96    4.51
   8   5  -2   55.43    4.30
   7   5  -2   23.52    2.04
  -7  -5   2   22.98    1.57
  -7  -5   2   20.42    1.62
  -7  -5   2   18.95    1.58
  -7  -5   2   20.43    1.72
  -7  -5   2   19.77    1.58
   6   5  -2    0.61    0.44
   6   5  -2    1.24    0.64
  -6  -5   2    1.88    0.40
  -6  -5   2    1.37    0.33
  -6  -5   2    2.08    0.53
  -6  -5   2    1.36    0.27
   5   5  -2    1.70    0.51
   5   5  -2    0.88    0.37
  -5  -5   2    0.53    0.25
  -5  -5   2    0.85    0.33
  -5  -5   2    0.78    0.25
  -5  -5   2    0.84    0.26
  -5  -5   2    0.53    0.45
   4   5  -2   10.57    0.97
  -4  -5   2    9.84    0.80
  -4  -5   2    9.41    0.80
  -4  -5   2   10.71    0.85
  -3  -5   2   15.99    1.17
  -3  -5   2   15.53    1.17
  -3  -5   2   16.61    1.19
   2   5  -2   53.70    3.84
  -2  -5   2   53.05    3.73
  -1  -5   2   33.21    2.33
   0  -5   2    0.22    0.15
  -1   5  -2   33.34    2.51
  -2   5  -2  100.43    7.12
  -5   5  -2   38.33    2.95
  -5   5  -2   46.43    3.07
  -6   5  -2   65.10    4.21
  -6   5  -2   60.91    4.20
  -6   5  -2   60.90    4.31
  -6   5  -2   52.50    4.17
  -7   5  -2    9.45    0.78
  -7   5  -2    8.80    0.70
  -7   5  -2    8.83    0.74
  -7   5  -2    8.19    0.74
  -7   5  -2    9.55    0.76
  -7   5  -2    8.78    0.96
  -7   5  -2   10.76    1.00
   7  -5   2    7.65    1.24
  -8   5  -2   60.56    4.35
  -8   5  -2   67.15    4.38
  -8   5  -2   60.23    4.35
  -8   5  -2   64.96    4.33
  -8   5  -2   65.76    4.33
   8  -5   2   64.56    4.41
   8  -5   2   54.74    4.82
   8  -5   2   55.26    4.38
  -9   5  -2    1.07    0.43
  -9   5  -2    0.87    0.17
  -9   5  -2    1.28    0.23
  -9   5  -2    0.82    0.24
  -9   5  -2    0.95    0.24
   9  -5   2    1.09    0.38
 -10   5  -2   31.33    2.09
 -10   5  -2   29.18    2.14
 -10   5  -2   30.69    2.11
 -10   5  -2   26.55    2.09
  10  -5   2   29.15    2.16
 -11   5  -2    0.19    0.10
 -11   5  -2   -0.04    0.12
 -11   5  -2    0.13    0.11
 -11   5  -2   -0.04    0.11
  11  -5   2   -0.01    0.25
  10   4  -2   26.17    2.30
   9   4  -2    1.41    0.52
   9   4  -2    0.39    0.96
  -9  -4   2    0.74    0.31
  -8  -4   2   67.06    5.14
  -8  -4   2   74.29    5.09
  -8  -4   2   77.62    5.16
   7   4  -2    9.57    1.48
  -7  -4   2   10.46    0.93
  -7  -4   2    8.51    0.94
  -7  -4   2   10.09    0.84
  -7  -4   2   10.05    0.82
  -7  -4   2    8.96    0.84
   6   4  -2   15.72    1.55
  -6  -4   2   15.01    1.25
  -6  -4   2   15.68    1.18
  -6  -4   2   15.20    1.19
  -6  -4   2   15.36    1.37
  -6  -4   2   15.64    1.20
   5   4  -2   19.41    1.71
  -5  -4   2   21.54    1.52
  -5  -4   2   19.79    1.52
  -5  -4   2   21.70    1.55
  -5  -4   2   21.30    1.52
  -5  -4   2   19.04    1.71
  -4  -4   2   52.65    3.77
  -4  -4   2   53.69    3.76
  -4  -4   2   54.67    3.76
  -3  -4   2    0.68    0.15
  -3  -4   2    0.78    0.18
  -3  -4   2    0.50    0.14
   2   4  -2   46.76    3.48
   1   4  -2  152.09   10.59
  -3   4  -2    3.69    0.56
  -5   4  -2   17.66    1.39
  -6   4  -2   58.68    3.89
  -6   4  -2   49.24    3.81
  -6   4  -2   54.54    3.81
  -7   4  -2    0.65    0.17
  -7   4  -2    1.16    0.22
  -7   4  -2    0.82    0.43
  -7   4  -2    1.04    0.40
  -7   4  -2    0.91    0.23
  -7   4  -2    0.92    0.27
  -7   4  -2    1.05    0.18
  -7   4  -2    0.73    0.21
  -7   4  -2    1.08    0.25
   7  -4   2    0.93    0.32
   7  -4   2    1.44    0.36
   7  -4   2    1.02    0.43
   7  -4   2    0.50    0.75
  -8   4  -2    0.27    0.20
  -8   4  -2    0.68    0.16
  -8   4  -2    0.93    0.43
  -8   4  -2    0.92    0.29
  -8   4  -2    0.91    0.26
  -8   4  -2    0.38    0.40
  -8   4  -2    0.77    0.23
  -8   4  -2    0.58    0.21
   8  -4   2    1.37    0.50
   8  -4   2    0.97    0.89
   8  -4   2    0.33    0.34
   8  -4   2    1.36    0.44
  -9   4  -2    6.64    0.62
  -9   4  -2    6.31    0.66
  -9   4  -2    7.48    0.57
  -9   4  -2    8.07    0.85
  -9   4  -2    6.40    0.61
   9  -4   2    5.92    0.83
   9  -4   2    7.34    0.94
   9  -4   2    9.16    1.68
 -10   4  -2    2.57    0.37
 -10   4  -2    3.36    0.51
 -10   4  -2    2.86    0.40
 -10   4  -2    3.31    0.35
  10  -4   2    2.43    0.50
 -11   4  -2    0.03    0.13
 -11   4  -2    0.17    0.12
 -11   4  -2    0.17    0.16
 -11   4  -2    0.13    0.14
  11  -4   2   -0.01    0.34
 -10  -3   2    6.05    0.61
   9   3  -2    1.89    1.01
  -9  -3   2    1.97    0.38
   8   3  -2   32.68    2.79
  -8  -3   2   29.80    2.20
  -8  -3   2   28.17    2.18
  -8  -3   2   29.21    2.11
   7   3  -2    4.47    0.92
  -7  -3   2    3.98    0.47
  -7  -3   2    3.64    0.47
  -7  -3   2    3.30    0.49
  -7  -3   2    4.49    0.61
  -7  -3   2    3.17    0.46
   6   3  -2   41.39    2.97
   6   3  -2   41.37    3.21
   6   3  -2   44.44    2.92
  -6  -3   2   40.02    2.92
  -6  -3   2   42.24    2.92
  -6  -3   2   40.92    2.90
  -6  -3   2   40.50    2.95
  -6  -3   2   36.75    3.01
   5   3  -2    1.97    0.31
  -5  -3   2    2.29    0.28
  -5  -3   2    2.07    0.29
  -5  -3   2    1.83    0.27
  -5  -3   2    2.31    0.45
  -5  -3   2    2.43    0.34
   4   3  -2   19.54    1.50
  -4  -3   2   22.14    1.50
  -4  -3   2   21.30    1.50
  -4  -3   2   20.66    1.52
  -3  -3   2   33.70    2.68
   1   3  -2    6.37    0.71
   0   3  -2  336.54   23.30
  -4   3  -2    9.20    0.80
   4  -3   2   10.39    1.01
  -5   3  -2    1.02    0.32
  -5   3  -2    1.78    0.32
   5  -3   2    1.76    0.56
  -6   3  -2   36.58    2.81
  -6   3  -2   36.54    2.75
  -6   3  -2   40.05    2.91
  -6   3  -2   34.73    2.76
  -6   3  -2   44.11    2.86
   6  -3   2   42.23    2.79
  -7   3  -2    7.12    0.62
  -7   3  -2    5.19    0.55
  -7   3  -2    5.99    0.56
  -7   3  -2    7.66    1.01
  -7   3  -2    7.36    0.74
  -7   3  -2    5.49    0.50
   7  -3   2    7.00    0.67
   7  -3   2    6.02    0.63
   7  -3   2    7.85    0.80
   7  -3   2    6.32    1.00
  -8   3  -2    4.71    0.69
  -8   3  -2    3.99    0.53
  -8   3  -2    3.87    0.46
  -8   3  -2    5.20    0.71
  -8   3  -2    3.84    0.53
  -8   3  -2    3.69    0.46
  -8   3  -2    4.75    0.50
  -8   3  -2    4.05    0.78
   8  -3   2    4.46    0.65
   8  -3   2    3.52    0.53
   8  -3   2    5.26    0.69
   8  -3   2    3.39    1.01
  -9   3  -2   11.99    0.92
  -9   3  -2   11.10    0.92
  -9   3  -2   10.41    1.09
  -9   3  -2   14.60    1.42
  -9   3  -2   10.46    0.95
   9  -3   2   11.26    1.09
   9  -3   2   14.23    1.91
   9  -3   2   10.94    1.20
 -10   3  -2    2.20    0.39
 -10   3  -2    2.30    0.30
 -10   3  -2    2.11    0.32
 -10   3  -2    2.32    0.35
  10  -3   2    1.95    0.55
 -11   3  -2    3.25    0.33
 -11   3  -2    2.61    0.32
 -11   3  -2    2.69    0.37
  11  -3   2    3.15    0.50
 -10  -2   2    2.66    0.44
  -9  -2   2    9.56    0.88
   8   2  -2   12.60    1.77
   8   2  -2   10.23    1.08
  -8  -2   2    9.82    0.92
  -8  -2   2    9.23    0.90
   7   2  -2    3.33    0.59
   7   2  -2    2.70    0.47
  -7  -2   2    2.79    0.33
  -7  -2   2    2.63    0.45
  -7  -2   2    3.67    0.45
  -7  -2   2    2.31    0.41
   6   2  -2   60.60    4.29
  -6  -2   2   55.64    4.53
  -6  -2   2   53.66    4.31
  -6  -2   2   62.28    4.26
  -6  -2   2   65.98    4.24
  -6  -2   2   59.82    4.25
  -6  -2   2   65.20    4.28
   5   2  -2   28.61    1.90
  -5  -2   2   25.73    1.91
  -5  -2   2   26.80    1.89
  -5  -2   2   25.83    1.99
  -5  -2   2   27.48    1.89
  -5  -2   2   23.27    2.12
   4   2  -2    7.43    0.58
   4   2  -2    6.74    0.53
  -4  -2   2    5.61    0.55
  -4  -2   2    6.29    0.52
  -4  -2   2    6.45    0.52
   3   2  -2   25.36    1.71
  -3  -2   2   25.33    1.71
  -3  -2   2   24.84    1.71
  -3  -2   2   21.58    1.71
   2   2  -2   25.14    1.56
   2   2  -2   21.10    1.54
  -2  -2   2   20.24    1.55
   0   2  -2   69.68    4.87
  -1   2  -2   11.51    0.89
  -2   2  -2    4.89    0.43
  -3   2  -2  184.63   12.84
  -4   2  -2   23.42    1.90
  -4   2  -2   28.14    1.86
   4  -2   2   25.68    1.81
  -5   2  -2   28.07    2.00
  -5   2  -2   24.77    2.08
   5  -2   2   30.10    2.17
   5  -2   2   27.66    1.95
  -6   2  -2    7.37    0.96
  -6   2  -2    8.32    0.76
   6  -2   2    8.34    0.69
   6  -2   2    9.57    0.76
   6  -2   2    7.16    1.10
  -7   2  -2    0.69    0.51
  -7   2  -2    0.16    0.14
  -7   2  -2    0.40    0.17
  -7   2  -2    0.04    0.25
  -7   2  -2    0.10    0.37
  -7   2  -2    0.29    0.21
   7  -2   2   -0.12    0.21
   7  -2   2    0.74    0.64
   7  -2   2    0.40    0.30
   7  -2   2    0.27    0.38
  -8   2  -2   13.90    1.15
  -8   2  -2   16.28    1.66
  -8   2  -2   16.01    1.29
  -8   2  -2   14.24    1.14
   8  -2   2   15.02    1.32
   8  -2   2   16.42    1.26
   8  -2   2   14.46    1.86
  -9   2  -2   33.26    2.62
  -9   2  -2   37.81    2.50
   9  -2   2   33.84    2.59
   9  -2   2   34.70    2.58
   9  -2   2   34.47    2.64
 -10   2  -2   27.10    1.92
 -10   2  -2   26.79    1.96
 -10   2  -2   25.54    1.95
 -10   2  -2   24.90    1.93
 -10   2  -2   26.95    1.93
  10  -2   2   28.66    2.10
 -11   2  -2    0.64    0.18
 -11   2  -2    0.67    0.21
 -11   2  -2    0.87    0.21
  11  -2   2    0.93    0.47
 -12   2  -2    0.39    0.13
 -12   2  -2    0.32    0.13
  12  -2   2    0.02    0.29
 -11  -1   2    1.35    0.18
 -11  -1   2    1.04    0.18
  10   1  -2    0.38    0.78
 -10  -1   2    0.18    0.25
   9   1  -2    1.35    0.57
   9   1  -2    3.00    0.99
  -9  -1   2    1.57    0.36
   8   1  -2   28.71    2.25
   8   1  -2   30.67    2.21
  -8  -1   2   27.08    2.03
  -8  -1   2   27.05    2.11
  -8  -1   2   27.40    2.10
  -8  -1   2   32.81    2.75
   7   1  -2    0.51    0.45
   7   1  -2    1.02    0.58
  -7  -1   2    1.61    0.89
  -7  -1   2    0.55    0.20
  -7  -1   2    0.91    0.42
  -7  -1   2    0.52    0.25
  -7  -1   2    1.06    0.33
   6   1  -2    1.93    0.35
   6   1  -2    2.37    0.41
   6   1  -2    2.04    0.49
  -6  -1   2    1.65    0.27
  -6  -1   2    2.26    0.63
  -6  -1   2    1.74    0.22
  -6  -1   2    1.49    0.25
  -6  -1   2    1.67    0.25
  -6  -1   2    1.92    0.34
  -6  -1   2    1.87    0.24
  -5  -1   2   21.23    1.47
  -5  -1   2   19.43    1.74
  -5  -1   2   20.90    1.47
  -5  -1   2   20.67    1.50
  -5  -1   2   19.50    1.53
   3   1  -2    1.23    0.18
  -3  -1   2    1.34    0.17
  -3  -1   2    1.12    0.14
  -3  -1   2    0.94    0.26
  -3  -1   2    1.09    0.16
  -2  -1   2   64.35    4.53
   1   1  -2   18.83    1.34
   0   1  -2   36.89    2.62
  -2   1  -2  383.06   26.53
  -3   1  -2  813.16   56.29
  -4   1  -2  783.77   54.31
  -5   1  -2   22.95    1.68
  -5   1  -2   19.91    1.79
  -5   1  -2   22.39    1.67
   5  -1   2   23.38    1.79
   5  -1   2   26.08    1.66
   5  -1   2   23.52    1.64
  -6   1  -2   52.76    4.08
  -6   1  -2   55.92    3.93
  -6   1  -2   58.62    3.95
   6  -1   2   52.45    3.90
   6  -1   2   58.97    3.93
   6  -1   2   55.32    4.08
  -7   1  -2   25.70    2.13
  -7   1  -2   30.39    2.44
  -7   1  -2   28.81    2.20
  -7   1  -2   32.58    2.16
   7  -1   2   32.30    2.48
   7  -1   2   29.65    2.15
   7  -1   2   30.25    2.19
  -8   1  -2    3.23    0.79
  -8   1  -2    3.26    0.38
  -8   1  -2    3.48    0.50
  -8   1  -2    3.69    0.52
  -8   1  -2    3.68    0.56
   8  -1   2    3.13    0.83
   8  -1   2    2.69    0.52
   8  -1   2    3.23    0.50
  -9   1  -2   48.45    3.20
  -9   1  -2   45.94    3.17
  -9   1  -2   48.34    3.62
  -9   1  -2   42.03    3.28
   9  -1   2   41.17    3.25
   9  -1   2   41.21    3.24
   9  -1   2   40.96    3.28
   9  -1   2   52.31    3.83
 -10   1  -2   14.47    1.11
 -10   1  -2   12.16    1.07
 -10   1  -2   13.65    1.04
 -10   1  -2   15.60    1.75
 -10   1  -2   13.59    1.10
  10  -1   2   14.41    1.34
 -11   1  -2   18.55    1.43
 -11   1  -2   18.47    1.42
 -11   1  -2   21.36    1.44
 -12   1  -2    8.64    0.66
 -12   1  -2    8.36    0.66
  12  -1   2    8.53    0.82
 -11   0   2    0.36    0.13
 -11   0   2    0.14    0.13
 -11   0   2    0.26    0.14
  10   0  -2    0.01    0.42
 -10   0   2    0.00    0.22
   9   0  -2   22.22    1.81
  -9   0   2   21.85    1.58
   8   0  -2   17.47    1.70
   8   0  -2   15.42    1.84
  -8   0   2   23.40    2.08
  -8   0   2   20.98    1.50
  -8   0   2   17.53    1.50
  -8   0   2   20.05    1.48
  -8   0   2   19.71    1.41
   7   0  -2   -0.11    0.55
   7   0  -2    0.12    0.39
   7   0  -2    0.34    0.44
  -7   0   2    0.54    0.68
  -7   0   2    0.60    0.36
  -7   0   2    0.08    0.23
  -7   0   2    0.10    0.31
   6   0  -2   45.74    3.47
  -6   0   2   51.89    3.72
  -6   0   2   49.65    3.46
  -6   0   2   47.50    3.44
  -5   0   2   35.97    2.49
  -5   0   2   31.87    2.25
  -5   0   2   28.48    2.22
  -5   0   2   30.85    2.22
  -4   0   2   41.73    3.03
  -4   0   2   41.71    3.02
  -4   0   2   45.51    3.02
  -4   0   2   44.07    3.17
  -3   0   2   35.44    2.48
  -3   0   2   33.57    2.49
  -3   0   2   37.05    2.49
  -3   0   2   36.41    2.59
   2   0  -2    8.93    0.63
  -2   0   2    8.38    0.72
  -2   0   2    8.10    0.62
  -2   0   2    9.17    0.62
  -1   0   2   69.07    4.84
   0   0   2  196.60   13.64
  -2   0  -2  254.44   17.66
  -4   0  -2  202.14   14.14
  -5   0  -2  424.70   29.57
  -6   0  -2   60.71    4.14
  -6   0  -2   57.06    4.11
  -6   0  -2   63.05    4.10
  -6   0  -2   52.41    4.28
   6   0   2   58.74    4.10
   6   0   2   58.31    4.09
   6   0   2   58.40    4.23
  -7   0  -2   16.67    1.29
  -7   0  -2   15.38    1.21
  -7   0  -2   15.29    1.61
  -7   0  -2   14.51    1.26
   7   0   2   16.61    1.21
   7   0   2   15.78    1.55
   7   0   2   17.12    1.24
  -8   0  -2    2.11    0.28
  -8   0  -2    1.43    0.73
  -8   0  -2    1.23    0.30
  -8   0  -2    1.68    0.32
  -8   0  -2    1.81    0.49
   8   0   2    2.10    0.82
   8   0   2    2.12    0.44
   8   0   2    1.84    0.34
   8   0   2    1.81    0.38
  -9   0  -2   18.99    1.38
  -9   0  -2   19.48    1.56
  -9   0  -2   19.07    1.47
  -9   0  -2   21.59    2.12
   9   0   2   18.69    1.49
   9   0   2   17.86    1.54
   9   0   2   18.06    1.56
 -10   0  -2    7.07    0.95
 -10   0  -2    7.84    0.77
 -10   0  -2    9.39    1.57
  10   0   2    7.68    1.03
 -11   0  -2   33.11    2.56
 -11   0  -2   37.30    2.57
  11   0   2   37.33    2.67
 -12   0  -2    7.39    0.61
 -12   0  -2    7.62    0.61
  12   0   2    7.93    0.78
 -10   1   2   -0.07    0.19
 -10   1   2    0.21    0.19
 -10   1   2    0.21    0.12
  -9   1   2   12.86    1.09
  -9   1   2   14.94    1.04
   8  -1  -2    5.54    0.74
   8  -1  -2    5.36    0.89
  -8   1   2    4.74    0.87
  -8   1   2    6.23    0.63
  -8   1   2    6.40    0.53
  -8   1   2    5.43    0.67
  -8   1   2    6.74    0.66
   7  -1  -2   10.30    1.07
   7  -1  -2   12.84    1.11
   7  -1  -2    8.52    1.20
  -7   1   2   10.97    0.92
  -7   1   2   11.42    0.88
  -7   1   2   11.66    0.98
  -7   1   2   11.97    1.51
  -7   1   2   12.36    0.99
  -7   1   2   11.45    0.96
   6  -1  -2   33.52    2.36
   6  -1  -2   33.62    2.28
   6  -1  -2   28.52    2.29
  -6   1   2   31.07    2.23
  -6   1   2   27.45    2.20
  -6   1   2   32.63    2.25
  -6   1   2   30.93    2.52
  -5   1   2   68.04    4.89
  -5   1   2   66.87    4.73
  -4   1   2    2.11    0.22
  -4   1   2    1.94    0.41
  -4   1   2    2.53    0.31
   3  -1  -2   32.46    2.10
  -3   1   2   30.14    2.19
  -3   1   2   27.96    2.09
  -3   1   2   28.63    2.08
   2  -1  -2    3.19    0.27
  -2   1   2    4.18    0.43
  -2   1   2    2.94    0.27
  -2   1   2    3.25    0.25
   0  -1  -2   36.61    2.47
   0   1   2   34.14    2.50
  -1  -1  -2    2.39    0.19
   1   1   2    2.72    0.19
   1   1   2    2.52    0.19
  -2  -1  -2   61.75    4.38
  -3  -1  -2  140.19    9.84
  -4  -1  -2  133.60    9.39
  -5  -1  -2    7.89    0.65
  -5  -1  -2    6.02    0.81
  -5  -1  -2    6.67    0.53
  -5  -1  -2    6.21    0.59
  -5  -1  -2    7.04    0.52
   5   1   2    6.83    0.53
   5   1   2    6.25    0.55
   5   1   2    6.75    0.73
  -6  -1  -2   23.77    1.64
  -6  -1  -2   25.23    1.69
  -6  -1  -2   20.31    1.58
  -6  -1  -2   21.27    1.64
  -6  -1  -2   20.72    1.87
   6   1   2   21.33    1.61
   6   1   2   23.48    1.60
  -7  -1  -2   21.73    1.69
  -7  -1  -2   22.47    1.72
  -7  -1  -2   24.28    2.07
  -7  -1  -2   23.06    1.77
   7   1   2   24.00    1.70
   7   1   2   25.70    1.68
   7   1   2   20.83    1.67
  -8  -1  -2    2.47    0.50
  -8  -1  -2    2.74    0.50
  -8  -1  -2    2.34    0.76
  -8  -1  -2    2.09    0.41
  -8  -1  -2    4.01    0.59
   8   1   2    3.65    0.54
   8   1   2    3.68    0.50
   8   1   2    3.81    0.92
   8   1   2    2.76    0.43
  -9  -1  -2    1.64    0.37
  -9  -1  -2    1.28    0.51
  -9  -1  -2    1.65    0.80
   9   1   2    2.25    0.43
   9   1   2    1.68    0.39
   9   1   2    2.11    1.06
   9   1   2    1.88    0.44
 -10  -1  -2    4.32    0.62
 -10  -1  -2    3.84    0.95
 -10  -1  -2    3.09    0.60
  10   1   2    6.27    1.88
 -11  -1  -2    0.58    0.25
 -11  -1  -2    0.13    0.29
 -11  -1  -2    0.54    0.24
  11   1   2    0.89    0.43
 -12  -1  -2    1.78    0.28
 -12  -1  -2    1.85    0.25
  10  -2  -2   -0.68    0.41
 -10   2   2    0.24    0.17
 -10   2   2    0.06    0.12
 -10   2   2   -0.07    0.16
  -9   2   2    4.37    0.50
  -9   2   2    4.85    0.44
  -8   2   2   41.36    2.71
  -8   2   2   33.91    2.66
  -8   2   2   42.19    3.07
  -8   2   2   35.82    2.68
   7  -2  -2    6.13    0.84
   7  -2  -2    5.26    0.85
   7  -2  -2    5.76    0.72
  -7   2   2    6.25    0.63
  -7   2   2    5.75    0.64
   6  -2  -2   -0.03    0.42
   6  -2  -2   -0.26    0.50
   6  -2  -2    0.10    1.00
   6  -2  -2    0.43    0.35
  -6   2   2    0.36    0.25
  -6   2   2    0.19    0.19
  -6   2   2    0.31    0.28
  -6   2   2    0.49    0.55
  -6   2   2    0.21    0.26
   5  -2  -2   64.65    4.92
   5  -2  -2   72.03    4.90
  -5   2   2   75.53    5.04
  -5   2   2   67.49    4.87
  -5   2   2   69.00    4.88
   4  -2  -2    7.06    0.60
   4  -2  -2    7.21    0.61
  -4   2   2    6.80    0.79
  -4   2   2    6.65    0.57
  -4   2   2    6.82    0.57
  -3   2   2  178.72   12.47
  -2   2   2   56.41    3.98
  -1   2   2  257.42   17.86
   0  -2  -2   42.57    2.97
  -2  -2  -2   11.34    0.80
  -2  -2  -2   12.60    0.80
   2   2   2    9.82    0.79
  -3  -2  -2   15.79    1.01
  -3  -2  -2   12.17    1.14
   3   2   2   13.13    1.00
   3   2   2   15.92    1.08
   3   2   2   13.58    1.00
  -4  -2  -2  123.83    8.74
  -5  -2  -2   47.89    3.17
  -5  -2  -2   48.82    3.18
  -5  -2  -2   44.68    3.19
   5   2   2   43.74    3.17
   5   2   2   41.69    3.17
  -6  -2  -2    0.78    0.42
  -6  -2  -2    1.47    0.27
  -6  -2  -2    1.26    0.21
  -6  -2  -2    1.29    0.31
  -6  -2  -2    1.16    0.20
  -6  -2  -2    2.06    0.42
   6   2   2    1.30    0.51
   6   2   2    1.56    0.23
   6   2   2    1.48    0.21
  -7  -2  -2    1.10    0.22
  -7  -2  -2    0.60    0.25
  -7  -2  -2    0.58    0.32
  -7  -2  -2    0.65    0.18
  -7  -2  -2    0.63    0.36
  -7  -2  -2    0.67    0.19
  -7  -2  -2    1.33    0.46
  -7  -2  -2    1.37    0.55
   7   2   2    1.02    0.23
   7   2   2    0.57    0.63
   7   2   2    0.99    0.22
  -8  -2  -2    0.93    0.28
  -8  -2  -2    1.23    0.73
  -8  -2  -2    0.85    0.26
  -8  -2  -2    0.97    0.44
  -8  -2  -2    1.96    0.53
  -8  -2  -2    1.34    0.29
  -8  -2  -2    0.74    0.27
   8   2   2    1.20    0.29
   8   2   2    1.39    0.32
   8   2   2    2.28    0.84
  -9  -2  -2    1.75    0.38
  -9  -2  -2    3.33    1.05
  -9  -2  -2    1.87    0.56
   9   2   2    3.01    0.81
   9   2   2    3.27    1.06
   9   2   2    1.85    0.39
  10   2   2   11.86    1.63
 -11  -2  -2    0.53    0.22
 -11  -2  -2    0.08    0.30
  11   2   2    1.06    0.42
  11   2   2   -0.13    0.71
 -12  -2  -2    0.06    0.18
  12   2   2    0.10    0.45
  10  -3  -2   -0.14    0.37
 -10   3   2    0.64    0.13
 -10   3   2    0.75    0.17
  -9   3   2    2.17    0.31
  -9   3   2    2.56    0.24
  -9   3   2    1.91    0.35
   8  -3  -2    7.34    1.01
  -8   3   2    9.26    0.69
  -8   3   2    7.93    0.73
  -8   3   2    9.31    0.76
  -8   3   2   10.19    0.89
  -8   3   2   10.44    0.78
  -8   3   2    9.75    1.25
   7  -3  -2    0.59    1.03
   7  -3  -2   -0.42    0.60
   7  -3  -2   -0.18    0.44
   7  -3  -2    0.04    0.41
  -7   3   2    0.33    0.60
  -7   3   2    0.24    0.11
  -7   3   2   -0.10    0.35
  -7   3   2    0.53    0.31
  -7   3   2    0.70    0.20
  -7   3   2    0.46    0.21
  -7   3   2    0.82    0.24
  -7   3   2    0.22    0.13
   6  -3  -2    6.98    1.27
   6  -3  -2    3.96    0.70
   6  -3  -2    3.44    0.54
   6  -3  -2    5.14    0.63
  -6   3   2    4.26    0.46
  -6   3   2    4.16    0.38
  -6   3   2    5.04    0.47
  -6   3   2    5.01    0.53
  -6   3   2    5.50    0.96
  -6   3   2    4.34    0.56
  -6   3   2    5.49    0.57
   5  -3  -2   15.12    1.23
   5  -3  -2   16.31    1.27
  -5   3   2   16.78    1.19
  -5   3   2   16.01    1.20
  -5   3   2   15.30    1.15
   4  -3  -2    1.10    0.28
   4  -3  -2    0.82    0.22
  -4   3   2    0.95    0.20
  -4   3   2    1.08    0.36
   3  -3  -2    3.05    0.30
   3  -3  -2    3.33    0.36
  -3   3   2    3.85    0.51
  -3   3   2    2.93    0.31
   2  -3  -2   10.83    0.78
  -2   3   2   11.49    0.87
  -2   3   2   10.05    0.77
  -1   3   2   32.84    2.34
   0  -3  -2   49.16    3.44
  -2  -3  -2   13.18    0.94
   3   3   2   55.85    3.87
  -4  -3  -2   -0.13    0.15
  -4  -3  -2    0.16    0.12
  -4  -3  -2    0.26    0.13
  -4  -3  -2    0.28    0.20
  -4  -3  -2   -0.10    0.24
   4   3   2    0.27    0.09
   4   3   2    0.14    0.17
   4   3   2    0.13    0.09
  -5  -3  -2  157.33   11.12
  -6  -3  -2    2.31    0.28
  -6  -3  -2    1.95    0.39
  -6  -3  -2    1.68    0.50
  -6  -3  -2    2.33    0.36
  -6  -3  -2    2.32    0.28
   6   3   2    2.36    0.51
   6   3   2    2.09    0.28
   6   3   2    1.59    0.24
  -7  -3  -2    8.21    0.90
  -7  -3  -2   11.01    0.92
  -7  -3  -2    9.12    0.80
  -7  -3  -2   10.48    1.02
  -7  -3  -2    9.11    0.81
   7   3   2   12.30    1.10
   7   3   2   11.27    0.82
   7   3   2    9.68    0.79
   7   3   2    9.42    0.81
  -8  -3  -2    9.22    1.01
  -8  -3  -2    8.62    0.75
  -8  -3  -2    8.73    0.79
  -8  -3  -2    7.47    0.83
  -8  -3  -2   11.10    0.94
   8   3   2    9.17    0.78
  -9  -3  -2   10.96    0.92
  -9  -3  -2    8.74    1.07
  10   3   2    2.10    0.87
 -12  -3  -2   -0.01    0.17
 -12  -3  -2    0.32    0.17
  12   3   2   -0.59    0.33
  10  -4  -2   -0.38    0.30
 -10   4   2    0.13    0.12
 -10   4   2    0.11    0.10
  -9   4   2    1.96    0.25
  -9   4   2    1.87    0.35
  -9   4   2    2.52    0.23
  -9   4   2    1.98    0.32
   8  -4  -2    1.23    0.44
  -8   4   2    0.75    0.19
  -8   4   2    0.74    0.19
  -8   4   2    0.91    0.22
  -8   4   2    0.97    0.36
  -8   4   2    0.81    0.58
  -8   4   2    1.18    0.16
   7  -4  -2    0.57    0.56
   7  -4  -2    1.45    0.48
   7  -4  -2    1.45    0.45
   7  -4  -2    1.80    1.04
  -7   4   2    1.51    0.23
  -7   4   2    2.01    0.61
  -7   4   2    1.98    0.39
  -7   4   2    1.92    0.27
   6  -4  -2   26.47    2.21
   6  -4  -2   29.90    2.16
   6  -4  -2   27.42    2.20
  -6   4   2   27.17    2.04
  -6   4   2   33.33    2.07
   5  -4  -2   11.32    0.89
   5  -4  -2   10.63    0.93
   5  -4  -2    9.63    0.96
  -5   4   2   10.34    0.79
  -5   4   2   10.92    0.78
   4  -4  -2   29.17    2.10
  -3   4   2   11.58    0.98
  -2   4   2    2.65    0.41
  -2   4   2    2.10    0.49
   0  -4  -2    1.64    0.22
   0  -4  -2    1.49    0.23
  -1  -4  -2   38.73    2.87
   1   4   2   41.57    2.90
  -2  -4  -2    1.09    0.25
  -2  -4  -2    0.72    0.12
   2   4   2    0.60    0.23
  -4  -4  -2  148.07   10.70
  -5  -4  -2   38.95    3.03
  -5  -4  -2   43.46    3.02
  -5  -4  -2   43.33    3.03
  -5  -4  -2   43.14    3.14
   5   4   2   45.83    3.14
  -6  -4  -2    0.96    0.26
  -6  -4  -2    0.68    0.35
  -6  -4  -2    1.01    0.24
  -6  -4  -2    1.09    0.25
  -6  -4  -2    0.80    0.31
   6   4   2    0.37    0.43
   6   4   2    0.56    0.17
   6   4   2    1.59    0.41
  -7  -4  -2    9.28    0.76
  -7  -4  -2    7.22    0.86
  -7  -4  -2    7.97    0.74
  -7  -4  -2    7.27    0.73
  -7  -4  -2   10.11    0.98
  -7  -4  -2    7.37    0.83
   7   4   2    9.70    1.06
   7   4   2    8.46    0.76
  -8  -4  -2    0.35    0.23
  -8  -4  -2    0.03    0.26
  -8  -4  -2   -0.01    0.29
  -8  -4  -2    0.49    0.56
  -8  -4  -2    0.46    0.23
  -8  -4  -2   -0.28    0.32
   8   4   2    0.28    0.73
  -9  -4  -2    3.44    0.49
  -9  -4  -2    4.44    0.70
  -9  -4  -2    3.85    0.55
  -9  -4  -2    3.32    0.56
 -10  -4  -2   33.35    2.43
 -11  -4  -2    7.86    0.72
  12   4   2    7.30    0.56
  -9   5   2    0.57    0.10
  -9   5   2    0.42    0.24
  -9   5   2    0.39    0.16
  -9   5   2    0.36    0.14
  -8   5   2   12.56    0.85
  -8   5   2   11.43    0.97
  -8   5   2    9.80    0.84
  -8   5   2   10.24    0.86
  -8   5   2   10.95    0.81
   7  -5  -2    0.02    0.39
   7  -5  -2    0.51    0.92
   7  -5  -2    0.25    0.53
   7  -5  -2    0.41    0.41
  -7   5   2    1.13    0.21
  -7   5   2    1.56    0.25
  -7   5   2    1.08    0.21
  -7   5   2    0.98    0.16
  -7   5   2    0.92    0.37
  -7   5   2    0.70    0.16
   6  -5  -2    2.53    0.46
   6  -5  -2    3.14    0.49
   6  -5  -2    2.49    1.21
   6  -5  -2    2.11    0.56
  -6   5   2    2.80    0.30
  -6   5   2    3.03    0.36
  -6   5   2    3.26    0.39
  -6   5   2    3.21    0.54
   5  -5  -2   28.97    2.15
  -5   5   2   30.26    2.09
  -5   5   2   29.35    2.09
  -5   5   2   29.72    2.09
  -4   5   2   37.94    2.71
  -4   5   2   40.90    2.67
  -4   5   2   35.32    2.66
  -4   5   2   38.42    2.67
  -3   5   2   12.91    1.22
  -1  -5  -2   57.43    4.13
   1   5   2   58.57    4.11
  -2  -5  -2  107.06    7.13
   2   5   2   95.39    7.09
  -5  -5  -2    9.27    0.95
  -5  -5  -2    9.38    0.75
  -5  -5  -2    8.17    0.74
   5   5   2    8.61    0.97
  -6  -5  -2   14.22    1.05
  -6  -5  -2   12.64    1.05
  -6  -5  -2   13.11    1.25
  -7  -5  -2   42.04    3.31
  -7  -5  -2   43.04    3.18
  -7  -5  -2   46.93    3.18
  -7  -5  -2   45.24    3.21
  -7  -5  -2   46.65    3.19
  -7  -5  -2   44.19    3.31
  -8  -5  -2   14.31    1.05
  -8  -5  -2   13.43    1.06
  -8  -5  -2   13.50    1.19
  -8  -5  -2   11.14    1.27
  -8  -5  -2   12.34    1.06
  -9  -5  -2    0.04    0.30
  -9  -5  -2    0.02    0.24
  -9  -5  -2    0.12    0.30
  -9  -5  -2    0.06    0.56
 -10  -5  -2   10.89    0.93
  11   5   2    0.54    0.54
  11   5   2    0.65    0.21
  -9   6   2    0.91    0.12
  -9   6   2    0.47    0.20
  -9   6   2    0.82    0.14
  -8   6   2   16.39    1.32
  -8   6   2   17.43    1.24
  -8   6   2   17.10    1.22
   7  -6  -2   -0.13    0.35
  -7   6   2    0.28    0.14
  -7   6   2    0.13    0.16
  -7   6   2    0.21    0.18
  -7   6   2    0.02    0.30
  -7   6   2    0.18    0.11
  -7   6   2    0.08    0.20
   6  -6  -2   39.49    3.48
  -6   6   2   36.19    2.68
  -6   6   2   36.19    2.66
  -6   6   2   39.28    2.77
  -6   6   2   38.05    2.69
  -6   6   2   38.65    2.65
  -5   6   2    8.86    0.85
  -5   6   2    9.49    0.73
  -5   6   2    9.51    0.73
  -5   6   2    8.85    0.74
  -5   6   2    8.54    0.70
  -5   6   2    9.81    0.73
  -4   6   2   37.75    2.78
  -4   6   2   41.65    2.79
  -4   6   2   39.62    2.87
  -4   6   2   41.08    2.82
  -4   6   2   38.89    2.79
  -3   6   2    0.04    0.14
  -3   6   2    0.75    0.39
  -3   6   2    0.17    0.09
  -3   6   2   -0.03    0.15
  -3   6   2   -0.04    0.23
  -2   6   2   85.93    5.96
  -1  -6  -2    3.17    0.42
  -1  -6  -2    2.39    0.34
   2   6   2    3.87    0.59
  -3  -6  -2    2.63    0.34
  -3  -6  -2    1.83    0.44
  -3  -6  -2    1.66    0.25
  -4  -6  -2    5.16    0.49
  -4  -6  -2    4.94    0.49
  -4  -6  -2    4.70    0.64
   4   6   2    3.22    0.60
   4   6   2    4.25    0.62
  -5  -6  -2  107.62    7.69
  -5  -6  -2  111.94    7.85
  -5  -6  -2  111.79    7.70
  -6  -6  -2    6.43    0.97
  -6  -6  -2    6.81    0.72
  -6  -6  -2    8.10    0.74
   6   6   2    8.80    0.70
   6   6   2    8.90    0.97
  -7  -6  -2    0.36    0.56
  -7  -6  -2    0.05    0.25
  -7  -6  -2   -0.37    0.29
  -7  -6  -2    0.07    0.28
  -7  -6  -2   -0.22    0.42
  -8  -6  -2    4.45    0.61
  -8  -6  -2    3.44    0.42
  -8  -6  -2    3.26    0.57
   8   6   2    3.18    0.52
   9   6   2    2.76    0.65
  10   6   2    2.63    0.59
  11   6   2    0.79    0.44
  -8   7   2    7.70    0.72
  -8   7   2    8.75    0.61
  -8   7   2    7.77    0.63
   7  -7  -2    5.38    0.72
  -7   7   2    5.58    0.65
  -7   7   2    5.73    0.48
  -7   7   2    4.99    0.49
  -7   7   2    5.74    0.46
  -6   7   2   32.56    2.24
  -6   7   2   31.12    2.24
  -6   7   2   29.55    2.22
  -6   7   2   30.10    2.33
  -6   7   2   33.81    2.22
  -5   7   2    4.23    0.47
  -5   7   2    3.84    0.60
  -5   7   2    4.26    0.43
  -5   7   2    4.48    0.46
  -5   7   2    4.10    0.39
  -5   7   2    4.38    0.43
  -4   7   2   12.56    1.03
  -4   7   2   15.69    1.07
  -4   7   2   14.57    1.06
  -4   7   2   13.51    1.16
  -4   7   2   13.55    1.06
  -4   7   2   15.20    1.07
  -3   7   2   19.22    1.44
  -3   7   2   19.75    1.52
  -3   7   2   20.24    1.44
  -3   7   2   21.85    1.44
  -3   7   2   18.65    1.42
  -2   7   2    5.99    0.50
  -2   7   2    5.62    0.47
  -2   7   2    5.17    0.56
  -2   7   2    6.22    0.50
  -2   7   2    4.65    0.55
  -2   7   2    4.68    0.43
  -2   7   2    5.33    0.45
  -2   7   2    4.95    0.43
  -1   7   2   43.12    3.06
  -1   7   2   39.58    2.90
  -1   7   2   40.32    2.89
  -1   7   2   40.34    2.89
  -1   7   2   44.73    2.95
  -1   7   2   41.49    2.88
  -1   7   2   39.75    2.89
   0  -7  -2    3.21    0.43
   0   7   2    3.44    0.36
   0   7   2    3.41    0.30
   1   7   2   23.17    1.57
   1   7   2   20.87    1.55
  -2  -7  -2    7.20    0.84
   2   7   2    7.31    0.70
   2   7   2    6.72    0.58
   2   7   2    7.59    0.87
   2   7   2    6.20    0.52
   2   7   2    8.32    0.95
  -3  -7  -2    6.65    0.80
   3   7   2    5.93    0.53
   3   7   2    5.21    0.49
   3   7   2    5.06    0.72
   3   7   2    4.70    0.51
   3   7   2    4.48    0.41
   3   7   2    4.75    0.77
  -4  -7  -2   31.21    2.48
  -4  -7  -2   38.10    2.69
  -4  -7  -2   37.80    2.49
  -4  -7  -2   38.44    2.50
   4   7   2   30.70    2.71
   4   7   2   36.23    2.46
   4   7   2   31.48    2.62
  -5  -7  -2    5.90    0.64
  -5  -7  -2    6.55    0.63
  -5  -7  -2    6.17    0.61
  -5  -7  -2    7.11    0.92
   5   7   2    6.49    0.59
  -6  -7  -2    1.95    0.31
  -6  -7  -2    1.82    0.52
   6   7   2    1.21    0.20
   6   7   2    0.96    0.39
   6   7   2    0.92    0.18
  -7  -7  -2    0.97    0.45
  -7  -7  -2    0.72    0.28
  -7  -7  -2    0.45    0.31
  -7  -7  -2   -0.11    0.39
  -7  -7  -2    0.48    0.28
   7   7   2    0.38    0.17
   7   7   2    0.51    0.19
   7   7   2    0.37    0.38
  -8  -7  -2    0.28    0.43
  -8  -7  -2    0.50    0.35
   8   7   2    0.71    0.21
   8   7   2    0.44    0.40
   8   7   2    0.83    0.47
   9   7   2    4.79    0.51
   9   7   2    5.26    0.90
  10   7   2    0.76    0.22
  10   7   2    0.64    0.43
  -8   8   2    0.73    0.12
  -8   8   2    0.70    0.09
  -8   8   2    0.60    0.20
   7  -8  -2    0.96    0.27
  -7   8   2    0.91    0.13
  -7   8   2    0.86    0.17
  -7   8   2    0.90    0.28
   6  -8  -2   36.35    2.84
  -6   8   2   40.69    2.77
  -6   8   2   41.20    2.77
  -6   8   2   39.37    2.78
  -5   8   2    1.01    0.19
  -5   8   2    0.68    0.17
  -5   8   2    0.77    0.34
  -5   8   2    0.75    0.19
  -5   8   2    0.67    0.19
  -5   8   2    0.48    0.14
  -4   8   2   14.38    1.05
  -4   8   2   13.60    1.17
  -4   8   2   14.54    1.05
  -4   8   2   14.13    1.03
  -4   8   2   13.26    1.02
  -3   8   2    5.27    0.65
  -3   8   2    5.21    0.48
  -3   8   2    6.54    0.56
  -3   8   2    5.77    0.55
  -3   8   2    5.60    0.50
  -3   8   2    5.55    0.48
  -2   8   2   24.03    1.71
  -2   8   2   24.90    1.72
  -2   8   2   24.07    1.80
  -2   8   2   24.01    1.70
  -2   8   2   23.37    1.72
  -2   8   2   23.58    1.74
  -2   8   2   24.19    1.72
  -1   8   2    2.25    0.54
  -1   8   2    1.61    0.27
  -1   8   2    0.91    0.18
  -1   8   2    1.33    0.19
  -1   8   2    1.36    0.20
  -1   8   2    1.07    0.29
   0  -8  -2   72.95    5.71
   0   8   2   90.88    5.68
   0   8   2   80.66    5.89
   0   8   2   82.61    5.61
   0   8   2   78.97    5.60
   0   8   2   81.45    5.60
   0   8   2   76.57    5.65
   0   8   2   80.43    5.60
  -1  -8  -2   12.29    1.22
  -1  -8  -2   16.24    1.25
   1   8   2   14.14    1.09
   1   8   2   14.74    1.05
   1   8   2   14.08    1.45
   1   8   2   15.19    1.40
   1   8   2   13.73    1.02
   1   8   2   13.87    1.04
  -2  -8  -2    0.75    0.38
   2   8   2    0.71    0.13
   2   8   2    0.18    0.53
   2   8   2    0.34    0.16
   2   8   2    0.67    0.16
   2   8   2    0.17    0.49
   3   8   2   36.26    2.37
   3   8   2   34.25    2.70
   3   8   2   32.63    2.60
   3   8   2   31.38    2.35
   4   8   2    7.45    0.57
   4   8   2    7.56    1.02
   4   8   2    6.61    1.03
   4   8   2    7.34    0.70
  -5  -8  -2   19.40    1.44
  -5  -8  -2   20.95    1.67
  -5  -8  -2   19.74    1.45
   5   8   2   18.81    1.62
   5   8   2   20.79    1.39
   5   8   2   17.15    1.36
   5   8   2   17.69    1.43
  -6  -8  -2    1.24    0.46
  -6  -8  -2    1.69    0.34
  -6  -8  -2    1.66    0.35
  -6  -8  -2    1.53    0.45
  -6  -8  -2    1.44    0.31
   6   8   2    2.26    0.43
   6   8   2    1.40    0.22
   6   8   2    0.94    0.43
  -7  -8  -2    0.71    0.42
  -7  -8  -2    0.89    0.26
  -7  -8  -2    0.42    0.48
  -7  -8  -2    0.77    0.30
  -7  -8  -2    1.38    0.34
   7   8   2    0.67    0.41
   7   8   2    0.66    0.19
   7   8   2    1.29    0.42
  -8  -8  -2    0.38    0.32
   8   8   2    0.42    0.20
   8   8   2    0.27    0.39
   9   8   2   12.51    0.87
   9   8   2    9.86    1.04
  -7   9   2    2.88    0.41
  -7   9   2    3.37    0.29
  -7   9   2    3.53    0.28
  -6   9   2    3.89    0.35
  -6   9   2    3.63    0.53
  -6   9   2    4.15    0.36
  -5   9   2   19.57    1.50
  -5   9   2   20.81    1.50
  -5   9   2   22.52    1.50
  -4   9   2   14.74    1.04
  -4   9   2   12.79    1.01
  -4   9   2   13.51    1.00
  -4   9   2   13.61    1.02
  -3   9   2    6.88    0.56
  -3   9   2    6.79    0.62
  -3   9   2    6.28    0.73
  -3   9   2    7.69    0.63
  -3   9   2    6.45    0.55
  -3   9   2    7.01    0.57
  -2   9   2   34.12    2.27
  -2   9   2   34.88    2.30
  -2   9   2   29.65    2.26
  -2   9   2   29.56    2.27
  -2   9   2   34.26    2.32
  -2   9   2   30.44    2.28
  -1   9   2   42.20    2.95
  -1   9   2   41.24    2.93
  -1   9   2   42.82    2.95
  -1   9   2   41.50    2.96
   0   9   2   15.37    1.44
   0   9   2   14.11    1.05
   0   9   2   14.65    1.06
   0   9   2   14.21    1.10
   0   9   2   13.43    1.02
   0   9   2   13.04    1.11
  -1  -9  -2    1.22    0.38
  -1  -9  -2    0.69    0.44
   1   9   2    0.79    0.18
   1   9   2    0.00    0.53
   1   9   2    0.72    0.18
   1   9   2    0.89    0.15
  -2  -9  -2    1.00    0.32
   2   9   2    0.94    0.17
   2   9   2    0.50    0.62
   2   9   2    0.85    0.18
   2   9   2    1.05    0.16
   2   9   2    0.02    0.55
  -3  -9  -2    5.83    0.80
   3   9   2    6.01    0.51
   3   9   2    5.47    0.52
   3   9   2    4.25    0.79
   3   9   2    5.46    0.46
  -4  -9  -2    5.43    0.55
  -4  -9  -2    4.07    0.53
  -4  -9  -2    3.87    0.61
   4   9   2    4.38    0.39
   4   9   2    4.88    0.46
   4   9   2    2.67    0.75
  -5  -9  -2   50.63    3.46
  -5  -9  -2   46.30    3.36
  -5  -9  -2   47.54    3.37
   5   9   2   46.48    3.36
   5   9   2   46.87    3.32
  -6  -9  -2    0.52    0.29
   6   9   2    0.52    0.16
   6   9   2    0.80    0.18
  -7  -9  -2    0.40    0.29
   7   9   2    0.82    0.18
   7   9   2    1.32    0.32
   7   9   2    0.91    0.20
   7   9   2    0.91    0.44
   8   9   2   17.72    1.18
   8   9   2   13.93    1.39
   8   9   2   16.70    1.27
   9   9   2   15.32    1.11
  -6  10   2    8.42    0.62
  -6  10   2    8.80    0.71
  -5  10   2   17.29    1.41
  -5  10   2   19.78    1.33
  -4  10   2    2.58    0.36
  -4  10   2    1.99    0.27
  -4  10   2    2.23    0.39
  -4  10   2    2.51    0.35
  -4  10   2    2.37    0.27
  -3  10   2   22.04    1.43
  -3  10   2   17.59    1.51
  -3  10   2   17.44    1.41
  -3  10   2   21.21    1.49
  -3  10   2   20.94    1.43
  -3  10   2   20.18    1.44
  -2  10   2    0.61    0.17
  -2  10   2    0.25    0.15
  -2  10   2    0.24    0.17
  -2  10   2   -0.01    0.19
  -2  10   2    0.06    0.45
  -2  10   2    0.53    0.30
  -1  10   2   53.18    3.64
  -1  10   2   50.13    3.44
  -1  10   2   45.57    3.44
  -1  10   2   53.72    3.46
  -1  10   2   48.16    3.45
  -1  10   2   45.09    3.50
   0  10   2   17.03    1.24
   0  10   2   18.22    1.30
   0  10   2   16.67    1.27
   0  10   2   17.03    1.35
   0  10   2   16.61    1.62
   0  10   2   17.80    1.27
   1  10   2   69.23    4.62
   1  10   2   67.94    4.64
   1  10   2   60.48    4.84
   1  10   2   67.95    4.63
   1  10   2   65.73    4.62
   2  10   2    2.26    0.66
   2  10   2    1.93    0.21
   2  10   2    2.22    0.38
   2  10   2    1.49    0.23
  -3 -10  -2   29.08    2.04
   3  10   2   23.78    2.16
   3  10   2   25.60    1.81
   3  10   2   25.91    1.83
   3  10   2   24.25    1.87
  -4 -10  -2    0.12    0.27
   4  10   2    0.43    0.14
   4  10   2    0.47    0.16
   4  10   2    0.03    0.54
   5  10   2   24.79    1.78
   5  10   2   23.85    1.72
   6  10   2    2.06    0.51
   6  10   2    2.25    0.28
  -8 -10  -2    0.75    0.23
  -5  11   2   30.13    2.34
  -5  11   2   37.02    2.34
  -4  11   2    2.04    0.37
  -4  11   2    2.74    0.28
  -4  11   2    2.13    0.23
  -3  11   2    8.35    0.71
  -3  11   2    8.18    0.76
  -3  11   2    9.55    0.68
  -3  11   2    9.73    0.69
  -2  11   2    5.20    0.41
  -2  11   2    5.08    0.46
  -2  11   2    4.28    0.54
  -1  11   2   12.38    0.90
  -1  11   2   13.26    0.92
  -1  11   2   12.00    0.99
  -1  11   2   12.15    1.19
  -1  11   2   11.89    0.94
   0  11   2   24.85    1.83
   0  11   2   28.65    1.87
   0  11   2   26.79    1.84
   0  11   2   24.14    2.07
   0  11   2   25.38    1.86
   1  11   2    0.30    0.15
   1  11   2   -0.04    0.50
   1  11   2   -0.09    0.17
   1  11   2    0.21    0.13
   2  11   2    0.11    0.17
   2  11   2   -0.23    0.50
   2  11   2    0.49    0.15
   2  11   2    0.19    0.16
   3  11   2   -0.52    0.50
   3  11   2   -0.01    0.16
   3  11   2    0.13    0.13
   3  11   2    0.06    0.17
  -4 -11  -2    0.01    0.23
   4  11   2   -0.19    0.47
   4  11   2    0.19    0.16
   5  11   2    2.62    0.28
  -6 -11  -2    0.39    0.21
   6  11   2    0.18    0.38
   7  11   2   20.96    1.34
   7  11   2   16.54    1.48
  -3  12   2    0.13    0.07
  -2  12   2    3.53    0.31
  -1  12   2    6.75    0.52
  -1  12   2    7.07    0.52
   0  12   2    0.80    0.17
   0  12   2    0.77    0.36
   1  12   2   -0.16    0.38
   2  12   2    2.10    0.32
   2  12   2    1.55    0.45
   3  12   2    3.01    0.35
   3  12   2    2.85    0.28
   4  12   2    0.99    0.14
  -5 -12  -2   -0.08    0.15
   5  12   2    0.18    0.10
   5  12   2   -0.28    0.31
   1  13   2    0.98    0.14
   1  13   2    0.71    0.25
   2  13   2    1.10    0.28
   2  13   2    1.26    0.15
   3  12  -3    5.70    0.48
   3  12  -3    6.89    0.56
   3  12  -3    7.28    0.73
   2  12  -3   19.29    1.28
   2  12  -3   15.49    1.24
   2  12  -3   18.04    1.41
   1  12  -3   17.29    1.39
   1  12  -3   15.91    1.36
   1  12  -3   17.95    1.23
   1  12  -3   15.99    1.19
   0  12  -3    9.15    0.72
   0  12  -3   10.82    0.77
   0  12  -3    9.26    0.99
   0  12  -3    9.16    0.92
  -1  12  -3    0.30    0.16
  -1  12  -3   -0.14    0.16
  -2  12  -3    3.02    0.36
  -2  12  -3    2.99    0.30
   5  11  -3    3.82    0.45
  -5 -11   3    3.23    0.34
   4  11  -3    1.90    0.41
   4  11  -3    1.99    0.23
   4  11  -3    1.65    0.54
   3  11  -3    0.59    0.16
   3  11  -3    1.28    0.49
   3  11  -3    0.28    0.40
   2  11  -3   30.98    2.21
   2  11  -3   28.78    2.17
   2  11  -3   25.20    2.42
   2  11  -3   26.70    1.96
   2  11  -3   27.18    2.01
   1  11  -3    0.09    0.43
   1  11  -3    0.10    0.20
   1  11  -3    0.40    0.40
   1  11  -3    0.44    0.17
   1  11  -3   -0.14    0.65
   0  11  -3    0.37    0.39
   0  11  -3   -0.08    0.65
   0  11  -3    0.47    0.39
   0  11  -3    0.28    0.42
   0  11  -3    0.19    0.22
  -1  11  -3    0.61    0.38
  -1  11  -3    0.62    0.24
  -1  11  -3    0.78    0.71
  -1  11  -3    1.14    0.23
  -1  11  -3    0.23    0.17
  -1  11  -3    0.49    0.35
  -1  11  -3    0.54    0.41
  -2  11  -3    0.94    0.17
  -2  11  -3    0.37    0.33
  -2  11  -3    0.70    0.37
  -2  11  -3    1.11    0.24
  -2  11  -3    0.46    0.69
  -3  11  -3   27.64    1.97
  -3  11  -3   26.49    1.96
  -3  11  -3   28.85    1.95
  -4  11  -3    1.93    0.31
  -4  11  -3    2.42    0.30
  -5  11  -3    0.63    0.20
  -5  11  -3    0.54    0.13
  -6  11  -3    0.09    0.10
  -6  11  -3   -0.21    0.14
  -6  11  -3   -0.10    0.13
   6  10  -3   10.82    0.94
   6  10  -3   13.55    1.11
  -6 -10   3   11.05    0.90
   5  10  -3    2.01    0.67
   5  10  -3    2.68    0.29
   5  10  -3    2.86    0.48
  -5 -10   3    2.98    0.42
   4  10  -3    0.87    0.18
   4  10  -3    1.02    0.41
   4  10  -3    0.98    0.54
  -4 -10   3    1.09    0.24
   3  10  -3   23.13    2.24
   3  10  -3   23.48    1.81
   3  10  -3   25.41    1.74
   3  10  -3   25.39    1.94
   2  10  -3    1.45    0.51
   2  10  -3    0.69    0.42
   2  10  -3    0.72    0.19
   2  10  -3    0.99    0.43
   2  10  -3    0.55    0.66
   1  10  -3   11.82    1.21
   1  10  -3   13.88    1.07
   1  10  -3   14.28    1.01
   1  10  -3   13.21    1.58
   1  10  -3   13.76    1.29
  -1 -10   3   12.65    1.42
   0  10  -3    0.63    0.21
   0  10  -3    0.33    0.35
   0  10  -3    0.45    0.32
   0  10  -3    0.59    0.66
   0  10  -3    0.45    0.45
   0  10  -3    0.68    0.42
   0 -10   3    0.56    0.32
  -1  10  -3    1.42    0.44
  -1  10  -3    1.14    0.73
  -1  10  -3    1.12    0.47
  -1  10  -3    1.30    0.38
  -1  10  -3    1.77    0.42
  -1  10  -3    1.90    0.37
  -1  10  -3    1.27    0.29
  -2  10  -3   51.65    4.02
  -2  10  -3   55.14    3.87
  -2  10  -3   53.94    3.97
  -2  10  -3   55.70    4.01
  -2  10  -3   55.54    3.89
  -2  10  -3   57.62    4.01
  -2  10  -3   53.24    4.30
  -2  10  -3   57.13    3.89
  -2  10  -3   57.61    3.89
  -3  10  -3    7.32    0.76
  -3  10  -3    7.90    0.75
  -3  10  -3    6.05    1.15
  -3  10  -3    9.16    0.76
  -3  10  -3    9.35    1.10
  -3  10  -3    9.16    0.68
  -3  10  -3    7.99    0.86
  -3  10  -3    7.37    0.69
  -4  10  -3   92.11    6.32
  -4  10  -3   97.42    6.33
  -4  10  -3   91.96    6.46
  -4  10  -3   81.89    6.38
  -5  10  -3   -0.13    0.33
  -5  10  -3    0.09    0.17
  -5  10  -3    0.48    0.19
  -5  10  -3    0.29    0.17
  -5  10  -3    0.43    0.19
  -5  10  -3    0.22    0.16
  -5  10  -3    0.48    0.24
  -6  10  -3    1.51    0.22
  -6  10  -3    1.86    0.22
  -6  10  -3    2.22    0.29
  -6  10  -3    1.95    0.35
  -7  10  -3    0.71    0.14
  -7  10  -3    0.58    0.13
  -7  10  -3    0.34    0.13
  -7  10  -3    0.39    0.24
   7   9  -3    5.02    0.84
   7   9  -3    3.51    0.58
  -7  -9   3    4.31    0.50
   6   9  -3    0.20    0.14
   6   9  -3    0.72    0.43
   6   9  -3    0.89    0.58
  -6  -9   3    0.35    0.26
   5   9  -3   -0.03    0.15
   5   9  -3    0.27    0.56
   5   9  -3    0.00    0.40
  -5  -9   3    0.13    0.25
   4   9  -3    3.43    0.55
   4   9  -3    4.17    0.38
   4   9  -3    2.96    0.64
   4   9  -3    4.19    0.89
  -4  -9   3    3.76    0.47
   3   9  -3   34.55    2.77
   3   9  -3   38.16    2.93
   3   9  -3   34.03    2.94
   3   9  -3   34.81    2.61
   3   9  -3   39.46    2.56
   3   9  -3   34.10    2.71
  -3  -9   3   39.22    2.87
   2   9  -3  155.01   10.07
   2   9  -3  148.05   10.35
   2   9  -3  140.81   10.16
   2   9  -3  147.12   10.21
   2   9  -3  144.43   10.23
  -2  -9   3  134.01   10.28
   1   9  -3   39.26    2.95
   1   9  -3   41.04    2.64
   1   9  -3   34.39    2.76
   1   9  -3   41.27    2.67
   1   9  -3   35.55    2.97
   1   9  -3   37.32    2.69
   1   9  -3   38.40    2.81
   1   9  -3   33.67    2.81
  -1  -9   3   33.80    2.86
   0   9  -3   38.36    2.90
   0   9  -3   40.15    3.00
   0   9  -3   39.91    2.91
   0   9  -3   36.64    2.91
   0   9  -3   38.06    2.80
   0   9  -3   36.14    2.76
   0   9  -3   40.00    2.78
   0   9  -3   42.94    3.15
   0   9  -3   41.07    2.76
  -1   9  -3   14.54    1.25
  -1   9  -3   13.13    1.20
  -1   9  -3   14.66    1.62
  -1   9  -3   13.03    1.17
  -1   9  -3   14.67    1.15
  -1   9  -3   15.23    1.08
  -1   9  -3   13.02    1.23
  -1   9  -3   16.61    1.37
  -1   9  -3   15.04    1.11
  -1   9  -3   16.36    1.45
  -1   9  -3   15.92    1.26
   1  -9   3   12.42    1.30
  -2   9  -3   41.79    3.03
  -2   9  -3   40.12    2.90
  -2   9  -3   40.20    2.90
  -2   9  -3   41.72    2.88
  -2   9  -3   40.60    3.06
  -2   9  -3   44.19    3.05
  -2   9  -3   41.66    3.01
  -2   9  -3   40.20    2.90
  -2   9  -3   39.51    2.96
  -2   9  -3   41.02    2.98
  -2   9  -3   39.47    3.32
  -2   9  -3   40.30    2.99
  -3   9  -3   12.55    1.05
  -3   9  -3   10.58    0.87
  -3   9  -3    9.54    0.92
  -3   9  -3   11.37    0.94
  -3   9  -3   11.30    0.86
  -3   9  -3   11.76    0.95
  -3   9  -3   12.68    1.64
  -3   9  -3   11.00    0.93
  -3   9  -3   11.79    0.99
  -3   9  -3    8.82    1.02
  -4   9  -3   75.96    5.50
  -4   9  -3   87.50    5.60
  -4   9  -3   74.90    5.51
  -4   9  -3   81.98    5.47
  -4   9  -3   74.28    5.46
  -4   9  -3   80.93    5.49
  -4   9  -3   74.82    5.53
  -5   9  -3   10.54    0.83
  -5   9  -3   11.07    0.83
  -5   9  -3   10.07    0.83
  -5   9  -3    9.22    1.04
  -5   9  -3   10.12    0.82
  -6   9  -3    5.93    0.49
  -6   9  -3    5.05    0.77
  -6   9  -3    5.35    0.51
  -6   9  -3    5.34    0.52
  -6   9  -3    5.54    0.51
  -7   9  -3    2.69    0.28
  -7   9  -3    2.41    0.30
  -7   9  -3    2.45    0.34
  -7   9  -3    2.20    0.45
  -7   9  -3    2.14    0.31
  -8   9  -3    4.21    0.37
  -8   9  -3    3.71    0.51
  -8   9  -3    4.59    0.36
  -8   9  -3    4.46    0.38
  -8   9  -3    3.60    0.35
   8   8  -3   35.88    2.70
   8   8  -3   36.75    2.59
   7   8  -3    1.36    0.43
   7   8  -3    1.23    0.47
   7   8  -3    0.77    0.22
  -7  -8   3    1.32    0.27
   6   8  -3   27.82    2.00
   6   8  -3   28.47    2.17
   6   8  -3   29.69    2.24
   6   8  -3   25.01    2.07
  -6  -8   3   31.17    2.06
   5   8  -3    4.09    0.77
   5   8  -3    4.66    0.43
   5   8  -3    5.17    0.86
  -5  -8   3    4.97    0.60
  -5  -8   3    5.02    0.76
  -5  -8   3    5.14    0.58
  -5  -8   3    4.11    0.60
   4   8  -3    2.41    0.55
   4   8  -3    3.02    0.33
   4   8  -3    2.65    0.67
   4   8  -3    2.39    0.47
  -4  -8   3    2.90    0.46
  -4  -8   3    2.71    0.63
  -4  -8   3    2.40    0.40
  -4  -8   3    3.05    0.38
   3   8  -3  146.24   10.56
   3   8  -3  160.42   10.73
   3   8  -3  162.06   10.66
  -3  -8   3  136.43   10.51
   2   8  -3   76.58    5.77
   2   8  -3   71.57    5.62
   2   8  -3   73.94    5.70
   2   8  -3   87.48    5.53
   2   8  -3   81.25    5.55
   2   8  -3   86.08    5.69
   2   8  -3   75.63    5.72
  -2  -8   3   80.23    5.76
  -2  -8   3   81.82    5.56
   1   8  -3   61.76    5.01
   1   8  -3   69.79    5.04
   1   8  -3   67.49    4.97
   1   8  -3   70.15    5.07
   1   8  -3   75.51    4.88
   1   8  -3   72.06    4.91
   1   8  -3   72.82    5.15
   1   8  -3   72.81    5.02
   1   8  -3   71.91    4.89
  -1  -8   3   66.25    4.90
   0   8  -3   56.02    4.36
   0   8  -3   64.57    4.28
   0   8  -3   62.99    4.30
   0   8  -3   64.65    4.57
   0   8  -3   64.62    4.38
   0   8  -3   59.55    4.29
   0   8  -3   58.20    4.45
   0   8  -3   55.54    4.39
   0   8  -3   61.01    4.41
   0   8  -3   65.51    4.40
   0   8  -3   61.91    4.29
  -1   8  -3   14.19    1.14
  -1   8  -3   14.22    1.02
  -1   8  -3   13.49    1.00
  -1   8  -3   15.19    1.46
  -1   8  -3   13.32    1.12
  -1   8  -3   13.19    1.14
  -1   8  -3   13.32    1.06
  -1   8  -3   11.46    1.12
  -1   8  -3   15.37    1.43
  -1   8  -3   12.32    1.09
  -1   8  -3   15.15    1.20
  -1   8  -3   12.59    1.12
  -2   8  -3    0.40    0.25
  -2   8  -3    0.55    0.25
  -2   8  -3    0.80    0.20
  -2   8  -3    0.72    0.36
  -2   8  -3    0.78    0.20
  -2   8  -3    0.60    0.26
  -2   8  -3    0.78    0.60
  -2   8  -3    0.20    0.19
  -2   8  -3    0.28    0.24
  -2   8  -3    0.48    0.38
  -2   8  -3    0.75    0.39
  -2   8  -3    0.62    0.28
  -2   8  -3    0.86    0.28
   2  -8   3    0.39    0.36
  -3   8  -3   31.98    2.28
  -3   8  -3   28.51    2.18
  -3   8  -3   27.73    2.19
  -3   8  -3   26.56    2.30
  -3   8  -3   30.95    2.23
  -3   8  -3   32.89    2.34
  -3   8  -3   34.81    2.69
  -3   8  -3   30.40    2.22
  -3   8  -3   30.86    2.25
  -3   8  -3   30.18    2.17
  -3   8  -3   34.09    2.32
  -4   8  -3    3.39    0.54
  -4   8  -3    3.59    0.44
  -4   8  -3    3.46    0.40
  -4   8  -3    2.23    0.32
  -4   8  -3    2.49    0.57
  -4   8  -3    4.32    0.94
  -4   8  -3    2.31    0.57
  -4   8  -3    2.64    0.42
  -4   8  -3    2.63    0.42
  -4   8  -3    2.88    0.37
  -4   8  -3    3.33    0.97
  -4   8  -3    3.62    0.40
  -5   8  -3    2.51    0.55
  -5   8  -3    3.58    0.46
  -5   8  -3    2.97    0.42
  -5   8  -3    4.22    0.63
  -5   8  -3    2.63    0.57
  -5   8  -3    3.02    0.38
  -5   8  -3    3.71    0.42
  -5   8  -3    3.12    0.53
  -5   8  -3    3.73    0.98
  -6   8  -3    4.07    0.45
  -6   8  -3    4.00    0.62
  -6   8  -3    3.98    0.45
  -6   8  -3    4.18    0.42
  -6   8  -3    4.89    0.51
  -7   8  -3    0.33    0.44
  -7   8  -3    0.50    0.24
  -7   8  -3    0.55    0.19
  -7   8  -3    0.44    0.16
  -7   8  -3    0.51    0.22
  -7   8  -3    0.53    0.15
  -8   8  -3    1.98    0.28
  -8   8  -3    1.83    0.29
  -8   8  -3    1.92    0.26
  -8   8  -3    1.83    0.26
  -8   8  -3    2.00    0.24
  -8   8  -3    1.55    0.39
  -9   8  -3    1.09    0.28
  -9   8  -3    1.35    0.21
  -9   8  -3    1.42    0.21
  -9   8  -3    2.02    0.26
  -9   8  -3    1.71    0.19
   9   7  -3    8.61    0.83
   9   7  -3    7.04    0.83
   8   7  -3   29.64    2.31
   8   7  -3   28.38    2.39
   8   7  -3   30.79    2.18
   7   7  -3   40.98    3.14
   7   7  -3   40.24    3.04
   7   7  -3   39.68    2.90
   7   7  -3   42.61    2.83
  -7  -7   3   37.87    2.86
   6   7  -3   11.36    1.40
   6   7  -3   13.46    1.34
   6   7  -3   15.31    1.01
   6   7  -3   12.12    1.53
  -6  -7   3   16.77    1.39
  -6  -7   3   11.79    1.12
  -6  -7   3   14.34    1.14
   5   7  -3    3.08    0.51
   5   7  -3    3.53    0.35
   5   7  -3    2.79    0.60
   5   7  -3    2.31    0.68
  -5  -7   3    3.55    0.46
  -5  -7   3    2.77    0.39
  -5  -7   3    2.44    0.61
  -5  -7   3    3.78    0.47
  -5  -7   3    3.43    0.42
   4   7  -3    8.97    1.10
   4   7  -3    7.07    1.01
   4   7  -3    9.13    0.97
   4   7  -3    9.63    0.68
  -4  -7   3    9.27    1.18
  -4  -7   3    8.66    0.77
  -4  -7   3    8.43    0.80
  -4  -7   3    8.75    0.79
  -4  -7   3    8.44    0.78
   3   7  -3   14.50    1.37
   3   7  -3   14.20    1.56
   3   7  -3   14.18    1.27
   3   7  -3   12.91    1.23
   3   7  -3   16.56    1.27
  -3  -7   3   15.11    1.12
  -3  -7   3   15.23    1.15
  -3  -7   3   14.28    1.11
   2   7  -3    3.06    0.58
   2   7  -3    4.22    0.36
   2   7  -3    3.82    0.57
   2   7  -3    4.44    0.55
   2   7  -3    3.08    0.61
  -2  -7   3    3.60    0.48
   1   7  -3  115.59    7.58
   1   7  -3  112.70    7.45
   1   7  -3  102.27    7.51
   1   7  -3  106.49    7.64
   1   7  -3   98.56    7.56
   1   7  -3  111.87    7.55
   1   7  -3  101.17    7.56
   1   7  -3  110.57    7.46
  -1  -7   3  106.43    7.46
   0   7  -3    0.56    0.25
   0   7  -3    0.28    0.39
   0   7  -3    0.57    0.14
   0   7  -3    0.40    0.21
   0   7  -3    0.14    0.16
   0   7  -3    0.26    0.26
   0   7  -3    0.88    0.22
   0   7  -3    1.04    0.26
   0   7  -3    0.53    0.22
   0   7  -3    0.91    0.45
   0   7  -3    0.44    0.14
   0  -7   3    0.41    0.22
  -1   7  -3    2.49    0.37
  -1   7  -3    1.72    0.33
  -1   7  -3    2.07    0.29
  -1   7  -3    2.35    0.35
  -1   7  -3    1.68    0.33
  -1   7  -3    2.37    0.57
  -1   7  -3    2.27    0.27
  -1   7  -3    2.77    0.39
  -1   7  -3    2.63    0.38
   1  -7   3    2.06    0.31
  -2   7  -3   19.36    1.60
  -2   7  -3   16.31    1.30
  -2   7  -3   17.55    1.30
  -2   7  -3   16.62    1.26
  -2   7  -3   16.45    1.20
  -2   7  -3   17.34    1.27
  -2   7  -3   17.21    1.22
  -2   7  -3   15.99    1.29
  -2   7  -3   15.63    1.49
  -2   7  -3   16.30    1.25
  -2   7  -3   13.52    1.55
  -2   7  -3   15.68    1.24
  -2   7  -3   17.90    1.35
  -3   7  -3    3.55    0.47
  -3   7  -3    3.83    0.40
  -3   7  -3    3.31    0.48
  -3   7  -3    2.81    0.37
  -3   7  -3    2.57    0.42
  -3   7  -3    2.79    0.39
  -3   7  -3    3.08    0.42
  -3   7  -3    2.91    0.49
  -3   7  -3    2.81    0.37
  -3   7  -3    2.85    0.50
  -3   7  -3    3.52    0.69
  -3   7  -3    3.39    0.74
  -3   7  -3    3.23    0.39
  -4   7  -3   14.14    1.21
  -4   7  -3   18.38    1.25
  -4   7  -3   17.11    1.24
  -4   7  -3   16.79    1.24
  -4   7  -3   17.50    1.20
  -4   7  -3   16.00    1.25
  -4   7  -3   15.80    1.25
  -4   7  -3   15.37    1.53
  -5   7  -3    8.52    1.10
  -5   7  -3    9.34    1.05
  -5   7  -3    9.11    0.81
  -5   7  -3   11.37    0.83
  -5   7  -3   10.83    0.80
  -5   7  -3    9.30    0.81
  -5   7  -3   11.70    0.85
  -5   7  -3   11.80    0.85
  -5   7  -3    9.63    0.86
  -6   7  -3    8.16    0.67
  -6   7  -3    8.07    0.72
  -6   7  -3    7.37    0.67
  -6   7  -3    7.55    0.98
  -6   7  -3    8.23    0.75
  -6   7  -3    7.87    0.70
  -6   7  -3    8.66    0.70
  -7   7  -3    4.58    0.54
  -7   7  -3    3.42    0.38
  -7   7  -3    5.01    0.79
  -7   7  -3    4.08    0.48
  -7   7  -3    2.31    0.68
  -7   7  -3    3.56    0.44
  -7   7  -3    3.53    0.41
   7  -7   3    2.62    0.78
  -8   7  -3    0.18    0.42
  -8   7  -3    0.52    0.24
  -8   7  -3   -0.13    0.23
  -8   7  -3    0.44    0.20
  -8   7  -3    0.24    0.20
  -8   7  -3    0.12    0.13
  -8   7  -3    0.27    0.16
  -9   7  -3    0.32    0.20
  -9   7  -3    0.10    0.15
  -9   7  -3    0.30    0.32
  -9   7  -3   -0.06    0.11
  -9   7  -3    0.13    0.11
 -10   7  -3    4.20    0.48
 -10   7  -3    4.92    0.42
 -10   7  -3    4.93    0.41
 -10   7  -3    5.62    0.40
   9   6  -3    2.34    0.46
   9   6  -3    1.28    0.69
   8   6  -3   -0.81    0.85
   8   6  -3    0.45    0.49
   8   6  -3    0.04    0.23
  -8  -6   3   -0.08    0.22
   7   6  -3    5.78    1.04
   7   6  -3    5.29    1.07
   7   6  -3    6.77    0.52
  -7  -6   3    5.81    0.64
   6   6  -3   28.44    2.49
   6   6  -3   28.15    2.58
   6   6  -3   28.73    2.29
  -6  -6   3   32.94    2.30
  -6  -6   3   34.30    2.27
  -6  -6   3   31.16    2.30
  -6  -6   3   36.44    2.53
   5   6  -3   11.02    0.81
   5   6  -3   11.43    1.13
  -5  -6   3   11.10    0.93
  -5  -6   3   11.13    1.26
  -5  -6   3    9.93    0.92
  -5  -6   3   10.58    0.96
  -5  -6   3   10.56    0.92
   4   6  -3   13.36    1.26
   4   6  -3   11.06    1.25
   4   6  -3   13.75    0.97
   4   6  -3   13.41    1.45
   4   6  -3   14.94    1.20
  -4  -6   3   12.80    1.04
  -4  -6   3   13.19    1.04
  -4  -6   3   13.20    1.08
  -4  -6   3   13.06    1.05
   3   6  -3  104.79    7.47
   3   6  -3  103.43    7.58
   3   6  -3  120.33    7.45
   3   6  -3  100.44    7.61
   2   6  -3  124.00    8.30
   2   6  -3  114.11    8.34
   2   6  -3  120.06    8.39
  -1  -6   3   10.53    0.81
   0  -6   3    1.55    0.25
  -1   6  -3    5.68    0.97
   1  -6   3    8.24    0.64
  -2   6  -3    5.01    0.76
  -3   6  -3    5.51    0.50
  -3   6  -3    5.45    0.55
  -3   6  -3    5.86    0.56
  -3   6  -3    6.73    0.67
  -3   6  -3    7.03    0.54
  -3   6  -3    5.51    0.49
  -3   6  -3    6.87    0.92
  -4   6  -3   77.06    5.54
  -4   6  -3   78.04    5.51
  -4   6  -3   79.02    5.69
  -4   6  -3   74.84    5.48
  -4   6  -3   82.77    5.57
  -4   6  -3   81.17    5.52
  -5   6  -3    2.55    0.36
  -5   6  -3    3.23    0.39
  -5   6  -3    3.18    0.40
  -5   6  -3    2.30    0.33
  -5   6  -3    2.13    0.30
  -5   6  -3    2.44    0.55
  -5   6  -3    3.20    0.46
  -5   6  -3    1.83    0.47
  -5   6  -3    3.15    0.35
  -5   6  -3    2.52    0.38
  -6   6  -3   25.09    2.05
  -6   6  -3   29.92    2.28
  -6   6  -3   29.87    2.09
  -6   6  -3   30.10    2.10
  -6   6  -3   26.78    2.08
  -6   6  -3   29.62    2.24
  -6   6  -3   31.95    2.10
  -7   6  -3    0.68    0.20
  -7   6  -3    0.81    0.21
  -7   6  -3    1.22    0.29
  -7   6  -3    0.82    0.25
  -7   6  -3    1.30    0.28
  -7   6  -3    0.73    0.45
  -7   6  -3    1.11    0.20
  -7   6  -3    0.53    0.42
   7  -6   3    0.54    0.62
  -8   6  -3    0.50    0.18
  -8   6  -3    0.04    0.23
  -8   6  -3    0.85    0.48
  -8   6  -3    0.36    0.22
  -8   6  -3    0.39    0.25
  -8   6  -3    0.73    0.23
  -8   6  -3    0.31    0.17
   8  -6   3    0.86    0.78
  -9   6  -3   13.97    1.17
  -9   6  -3   14.15    1.03
  -9   6  -3   12.87    1.02
  -9   6  -3   13.15    0.99
   9  -6   3   12.30    1.09
 -10   6  -3   12.27    0.85
 -10   6  -3   11.33    0.87
 -10   6  -3   10.57    0.94
 -10   6  -3   11.55    0.87
  10  -6   3   11.49    0.95
   9   5  -3    3.64    0.57
   9   5  -3    2.86    0.90
   8   5  -3    2.77    1.00
  -8  -5   3    2.87    0.44
   7   5  -3   49.51    3.62
  -7  -5   3   43.71    3.30
  -7  -5   3   39.56    3.32
  -7  -5   3   45.80    3.26
  -7  -5   3   41.94    3.22
  -7  -5   3   49.71    3.20
   6   5  -3    5.33    0.83
   6   5  -3    5.39    0.95
   6   5  -3    7.19    0.54
  -6  -5   3    5.85    0.65
  -6  -5   3    6.47    0.74
  -6  -5   3    6.05    0.64
  -6  -5   3    6.00    0.66
  -6  -5   3    5.71    0.79
   5   5  -3   11.20    0.83
   5   5  -3   10.68    1.06
   5   5  -3   11.04    1.27
  -5  -5   3   11.69    1.24
  -5  -5   3   10.86    0.92
  -5  -5   3   10.87    0.92
  -5  -5   3   11.19    0.93
  -5  -5   3   11.17    0.97
   4   5  -3    6.26    0.65
   4   5  -3    5.36    0.84
  -4  -5   3    5.09    0.51
  -4  -5   3    4.49    0.50
  -4  -5   3    4.26    0.55
  -4  -5   3    4.74    0.58
  -3  -5   3   56.83    4.07
  -3  -5   3   59.13    4.07
  -3  -5   3   58.49    4.08
  -2  -5   3   21.97    1.54
  -2  -5   3   22.12    1.53
  -2  -5   3   20.28    1.52
  -1  -5   3   74.43    5.18
   0  -5   3   46.56    3.26
  -1   5  -3   71.62    5.16
  -2   5  -3    0.62    0.37
  -4   5  -3   83.20    5.94
  -5   5  -3   52.65    3.97
  -5   5  -3   59.08    4.02
  -5   5  -3   60.58    4.15
  -5   5  -3   58.05    4.03
  -5   5  -3   55.20    4.10
  -6   5  -3   41.60    3.10
  -6   5  -3   44.12    3.13
  -6   5  -3   38.60    2.98
  -6   5  -3   44.67    3.00
  -6   5  -3   41.39    2.98
  -7   5  -3    1.63    0.31
  -7   5  -3    2.35    0.56
  -7   5  -3    1.35    0.26
  -7   5  -3    1.34    0.29
  -7   5  -3    1.75    0.51
  -7   5  -3    2.23    0.30
  -7   5  -3    1.93    0.32
  -7   5  -3    2.49    0.42
   7  -5   3    1.85    0.81
  -8   5  -3    0.98    0.23
  -8   5  -3    0.58    0.24
  -8   5  -3    0.70    0.27
  -8   5  -3    1.33    0.26
  -8   5  -3    0.88    0.20
  -8   5  -3    0.78    0.26
  -8   5  -3    0.72    0.46
  -8   5  -3    0.67    0.47
   8  -5   3    1.18    0.84
  -9   5  -3   27.18    1.95
  -9   5  -3   23.50    1.80
  -9   5  -3   26.54    1.79
  -9   5  -3   23.00    1.81
  -9   5  -3   24.68    1.84
 -10   5  -3    1.95    0.39
 -10   5  -3    2.22    0.28
 -10   5  -3    2.03    0.27
 -10   5  -3    1.73    0.28
  10  -5   3    1.86    0.39
 -11   5  -3   17.79    1.28
 -11   5  -3   15.93    1.28
 -11   5  -3   18.02    1.26
 -11   5  -3   18.76    1.26
  10   4  -3    0.06    0.60
 -10  -4   3    0.09    0.18
   9   4  -3    1.81    0.94
  -9  -4   3    1.02    0.32
   8   4  -3   33.92    2.74
  -8  -4   3   27.97    2.08
  -8  -4   3   27.19    2.39
   7   4  -3   76.86    5.63
  -7  -4   3   74.02    5.29
  -7  -4   3   72.97    5.31
  -7  -4   3   77.20    5.26
   6   4  -3   25.53    2.35
  -6  -4   3   26.40    1.98
  -6  -4   3   27.64    1.92
  -6  -4   3   25.79    2.09
  -6  -4   3   26.35    1.94
  -6  -4   3   26.31    1.94
   5   4  -3   53.96    4.51
   5   4  -3   67.19    4.45
  -5  -4   3   62.64    4.33
  -5  -4   3   61.26    4.49
  -5  -4   3   62.91    4.32
  -5  -4   3   61.56    4.33
  -5  -4   3   61.07    4.34
   4   4  -3   22.51    1.93
  -4  -4   3   25.19    1.75
  -4  -4   3   25.27    1.73
  -4  -4   3   22.76    1.73
   2   4  -3   61.11    4.58
   1   4  -3  585.79   40.60
  -3   4  -3   78.28    5.56
   4  -4   3  120.96    8.54
  -5   4  -3    8.36    0.83
  -6   4  -3   42.85    3.10
  -6   4  -3   45.26    3.03
  -6   4  -3   40.80    3.01
  -6   4  -3   39.88    3.00
  -6   4  -3   44.16    3.11
  -6   4  -3   42.07    3.04
  -7   4  -3   22.98    1.82
  -7   4  -3   23.25    1.79
  -7   4  -3   28.80    1.97
  -7   4  -3   28.48    1.83
  -7   4  -3   24.13    1.84
   7  -4   3   22.52    2.31
  -8   4  -3    9.19    0.91
  -8   4  -3   11.06    0.84
  -8   4  -3   11.11    0.89
  -8   4  -3    9.93    1.08
  -8   4  -3   12.39    1.11
   8  -4   3   11.63    1.00
   8  -4   3   11.63    1.73
   8  -4   3   12.50    1.07
  -9   4  -3   21.18    1.53
  -9   4  -3   18.80    1.52
  -9   4  -3   22.80    1.68
  -9   4  -3   19.38    1.55
  -9   4  -3   19.44    1.48
   9  -4   3   23.52    2.29
   9  -4   3   21.92    1.65
   9  -4   3   20.08    1.61
 -10   4  -3   14.62    1.08
 -10   4  -3   13.78    1.07
 -10   4  -3   14.11    1.17
 -10   4  -3   12.84    1.10
  10  -4   3   15.60    1.24
 -11   4  -3   24.58    1.78
 -11   4  -3   25.71    1.80
 -11   4  -3   24.82    1.78
  10   3  -3    1.72    0.70
 -10  -3   3    0.95    0.23
  -9  -3   3    6.41    0.68
   8   3  -3   22.59    2.37
  -8  -3   3   21.09    1.66
  -8  -3   3   21.94    1.57
   7   3  -3   84.72    6.31
  -7  -3   3   75.77    5.95
  -7  -3   3   87.27    5.97
  -7  -3   3   93.28    5.91
  -7  -3   3   82.87    5.94
   6   3  -3   14.95    1.74
  -6  -3   3   14.99    1.15
  -6  -3   3   15.29    1.15
  -6  -3   3   14.78    1.20
  -6  -3   3   15.59    1.13
  -6  -3   3   13.19    1.27
  -5  -3   3   57.65    4.20
  -5  -3   3   61.35    4.21
  -5  -3   3   60.39    4.22
  -5  -3   3   60.23    4.20
  -4  -3   3    8.84    0.71
  -4  -3   3    9.22    0.74
  -4  -3   3    8.84    0.70
  -3  -3   3   32.39    2.28
  -3  -3   3   30.26    2.28
  -3  -3   3   34.51    2.28
   1   3  -3   57.17    4.13
   0   3  -3   59.15    4.16
  -1   3  -3   11.99    1.00
  -2   3  -3    1.92    0.32
  -3   3  -3    3.76    0.47
  -4   3  -3  172.39   12.00
  -5   3  -3   29.23    2.15
  -5   3  -3   29.73    2.12
   5  -3   3   27.39    2.26
  -6   3  -3    0.97    0.30
  -6   3  -3    1.03    0.21
  -6   3  -3    1.46    0.25
  -6   3  -3    0.91    0.19
  -6   3  -3    1.73    0.39
  -6   3  -3    1.40    0.44
   6  -3   3    0.44    0.52
  -7   3  -3   17.92    1.35
  -7   3  -3   16.59    1.38
  -7   3  -3   19.34    1.65
  -7   3  -3   19.18    1.49
   7  -3   3   20.16    1.39
   7  -3   3   16.57    1.86
  -8   3  -3    0.20    0.23
  -8   3  -3    0.06    0.23
  -8   3  -3    0.31    0.23
  -8   3  -3    0.71    0.27
  -8   3  -3    0.66    0.39
  -8   3  -3    0.11    0.59
  -8   3  -3    0.30    0.22
  -8   3  -3    0.55    0.14
  -8   3  -3    0.54    0.47
   8  -3   3    0.86    0.78
   8  -3   3    1.16    0.45
   8  -3   3    0.88    0.41
  -9   3  -3    5.79    0.68
  -9   3  -3    8.19    0.67
  -9   3  -3    7.61    0.65
  -9   3  -3    7.61    0.83
  -9   3  -3    8.33    1.22
  -9   3  -3    5.99    0.89
  -9   3  -3    7.32    0.65
  -9   3  -3    5.96    0.64
   9  -3   3    7.13    0.93
   9  -3   3    6.53    0.83
   9  -3   3    9.39    1.72
 -10   3  -3   19.61    1.52
 -10   3  -3   19.90    1.55
 -10   3  -3   19.99    1.58
 -10   3  -3   22.55    1.52
  10  -3   3   20.92    1.68
 -11   3  -3    0.09    0.16
 -11   3  -3    0.31    0.17
 -11   3  -3    0.02    0.19
  11  -3   3    0.26    0.41
 -12   3  -3   11.88    0.88
 -12   3  -3   11.85    0.89
  12  -3   3   12.77    1.00
  10   2  -3    0.48    0.63
 -10  -2   3    0.40    0.22
   9   2  -3    0.40    0.90
  -9  -2   3    0.34    0.30
   8   2  -3   38.92    3.25
  -8  -2   3   36.65    2.67
  -8  -2   3   35.80    2.67
   7   2  -3   19.25    2.11
   7   2  -3   18.44    1.46
  -7  -2   3   17.53    1.29
  -7  -2   3   17.56    1.37
  -7  -2   3   16.27    1.35
   6   2  -3   53.43    3.82
  -6  -2   3   48.83    3.38
  -6  -2   3   43.61    3.44
  -6  -2   3   43.21    3.39
  -6  -2   3   50.88    3.36
  -6  -2   3   49.20    3.40
  -6  -2   3   46.66    3.38
   5   2  -3   60.26    4.21
   5   2  -3   63.61    4.21
  -5  -2   3   59.61    4.18
  -5  -2   3   61.00    4.18
  -5  -2   3   57.21    4.19
  -5  -2   3   56.40    4.18
  -4  -2   3   23.79    1.69
  -4  -2   3   22.74    1.70
  -4  -2   3   24.76    1.70
  -2  -2   3  177.93   12.44
  -1  -2   3   21.10    1.38
  -1  -2   3   20.13    1.38
  -1  -2   3   17.76    1.38
   0  -2   3    0.79    0.11
   0  -2   3    0.98    0.10
  -3   2  -3   17.88    1.23
  -3   2  -3   18.06    1.27
  -3   2  -3   15.18    1.26
  -4   2  -3  140.09    9.81
  -5   2  -3   42.52    3.27
  -5   2  -3   46.39    3.20
   5  -2   3   45.93    3.30
  -6   2  -3    8.74    0.82
   6  -2   3    7.24    1.08
   6  -2   3    9.80    0.73
  -7   2  -3   26.18    1.86
  -7   2  -3   26.29    2.15
  -7   2  -3   26.81    1.96
   7  -2   3   22.98    2.20
   7  -2   3   26.09    1.88
  -8   2  -3    0.64    0.26
  -8   2  -3    0.24    0.22
  -8   2  -3    0.20    0.35
  -8   2  -3    0.09    0.66
  -8   2  -3    0.35    0.20
  -8   2  -3    0.77    0.46
  -8   2  -3    0.35    0.25
   8  -2   3    0.48    0.37
   8  -2   3    0.98    0.43
   8  -2   3    0.50    0.73
  -9   2  -3   11.28    0.95
  -9   2  -3   11.19    0.86
  -9   2  -3    8.18    0.82
  -9   2  -3   10.95    1.51
  -9   2  -3   10.32    0.82
  -9   2  -3   10.29    1.07
  -9   2  -3   10.51    0.85
   9  -2   3    8.69    1.01
   9  -2   3    9.01    1.78
   9  -2   3    8.54    0.97
   9  -2   3   10.00    1.07
 -10   2  -3    0.12    0.21
 -10   2  -3    0.11    0.25
 -10   2  -3    0.08    0.22
 -10   2  -3    0.20    0.66
 -10   2  -3   -0.17    0.23
 -10   2  -3    0.40    0.31
  10  -2   3    0.48    0.49
 -11   2  -3   33.70    2.27
 -11   2  -3   31.25    2.31
 -11   2  -3   31.15    2.30
 -12   2  -3    2.03    0.26
 -12   2  -3    2.44    0.29
  12  -2   3    1.99    0.38
  10   1  -3    1.79    0.60
 -10  -1   3    1.29    0.24
   9   1  -3    4.26    0.75
  -9  -1   3    3.32    0.52
   8   1  -3   13.73    1.26
   8   1  -3   15.41    1.87
  -8  -1   3   12.45    1.07
  -8  -1   3   12.91    1.08
  -8  -1   3   12.84    0.97
   7   1  -3    9.16    1.09
  -7  -1   3    8.26    0.79
  -7  -1   3    8.58    1.58
  -7  -1   3    8.53    0.82
  -7  -1   3    7.36    0.75
  -6  -1   3   33.88    2.45
  -6  -1   3   35.55    2.40
  -6  -1   3   34.87    2.87
  -6  -1   3   31.80    2.41
   5   1  -3    8.38    0.78
  -5  -1   3    9.76    1.13
  -5  -1   3    7.55    0.65
  -5  -1   3    8.71    0.66
  -5  -1   3    7.16    0.75
  -5  -1   3    7.59    0.64
  -5  -1   3    8.21    0.69
  -4  -1   3   17.33    1.22
  -4  -1   3   17.47    1.23
  -4  -1   3   16.41    1.24
  -4  -1   3   16.78    1.48
  -3  -1   3  119.76    8.42
  -2  -1   3  159.48   11.13
   1   1  -3   14.68    1.15
  -1  -1   3   15.45    1.11
  -1  -1   3   17.31    1.11
   0   1  -3    4.47    0.40
   0   1  -3    4.89    0.37
   0  -1   3    5.43    0.37
   0  -1   3    5.00    0.37
   0  -1   3    5.02    0.36
  -2   1  -3   74.42    5.22
  -3   1  -3    1.94    0.21
  -3   1  -3    1.98    0.27
  -3   1  -3    1.81    0.34
   3  -1   3    1.76    0.19
   3  -1   3    2.08    0.21
  -4   1  -3   77.06    5.45
  -5   1  -3   51.27    4.08
  -5   1  -3   60.99    3.99
  -5   1  -3   59.45    3.95
   5  -1   3   51.85    4.06
   5  -1   3   57.49    3.95
   5  -1   3   58.18    3.96
  -6   1  -3  227.94   15.78
  -7   1  -3    4.72    0.62
  -7   1  -3    3.86    0.46
  -7   1  -3    3.57    0.70
   7  -1   3    4.56    0.49
   7  -1   3    2.70    0.64
  -8   1  -3   56.50    4.13
  -8   1  -3   58.42    4.03
  -8   1  -3   61.11    4.39
   8  -1   3   53.84    4.36
   8  -1   3   58.82    4.09
   8  -1   3   55.43    4.06
  -9   1  -3    8.25    0.76
  -9   1  -3    9.03    1.59
  -9   1  -3    8.81    0.81
  -9   1  -3    8.78    0.81
  -9   1  -3    9.34    1.00
  -9   1  -3    9.73    0.73
  -9   1  -3    8.46    0.78
   9  -1   3    8.47    0.98
   9  -1   3    7.53    0.88
   9  -1   3    9.13    1.71
 -10   1  -3   69.45    4.83
 -10   1  -3   77.06    5.23
 -10   1  -3   64.76    4.86
 -10   1  -3   70.71    4.85
  10  -1   3   63.63    4.91
  10  -1   3   67.27    4.91
  10  -1   3   70.87    4.96
 -11   1  -3    9.18    0.74
 -11   1  -3    7.96    0.75
 -11   1  -3    8.86    0.69
  11  -1   3   10.63    1.06
 -12   1  -3    3.96    0.40
 -12   1  -3    4.43    0.41
  12  -1   3    4.42    0.69
 -10   0   3    9.24    0.73
   9   0  -3   12.53    1.21
  -9   0   3   12.96    0.95
   8   0  -3   -0.05    0.60
  -8   0   3    0.17    0.28
  -8   0   3    0.58    0.19
  -8   0   3    0.01    0.33
  -8   0   3    0.49    0.80
  -8   0   3    0.37    0.30
   7   0  -3   49.62    3.83
   7   0  -3   55.16    3.78
  -7   0   3   54.81    3.71
  -7   0   3   49.68    3.73
  -7   0   3   52.14    3.71
   6   0  -3    8.93    0.89
   6   0  -3    8.73    1.05
   6   0  -3    9.39    0.93
  -6   0   3    8.33    0.78
  -6   0   3    7.48    0.76
  -6   0   3    8.57    1.32
   5   0  -3   -0.21    0.48
   5   0  -3    0.24    0.38
   5   0  -3    0.67    0.32
  -5   0   3    0.68    0.21
  -5   0   3    0.62    0.23
  -5   0   3    0.49    0.14
  -5   0   3    0.69    0.50
  -4   0   3  152.80   10.74
  -3   0   3   24.90    1.71
  -3   0   3   24.58    1.85
  -3   0   3   22.32    1.71
  -3   0   3   25.37    1.71
  -2   0   3  383.88   26.65
   1   0  -3   17.50    1.24
  -1   0   3   18.19    1.20
  -1   0   3   15.78    1.20
   0   0   3  287.81   19.97
  -1   0  -3    6.47    0.46
  -1   0  -3    6.66    0.46
   1   0   3    5.91    0.45
   1   0   3    6.33    0.46
  -2   0  -3    9.97    0.73
  -2   0  -3   11.95    0.77
  -2   0  -3   11.75    0.85
  -2   0  -3    9.53    0.73
   2   0   3    9.34    0.74
   2   0   3   10.35    0.74
  -3   0  -3  351.56   24.42
  -4   0  -3  418.81   29.11
  -5   0  -3    1.75    0.29
  -5   0  -3    2.10    0.28
   5   0   3    1.86    0.23
   5   0   3    1.29    0.18
   5   0   3    1.04    0.33
  -6   0  -3   31.43    2.22
   6   0   3   31.12    2.16
   6   0   3   31.47    2.18
   6   0   3   27.38    2.31
  -7   0  -3   41.26    2.87
  -7   0  -3   41.64    2.95
  -7   0  -3   39.70    2.89
  -7   0  -3   36.35    3.17
   7   0   3   43.68    2.88
   7   0   3   43.84    2.90
   7   0   3   36.91    3.09
  -8   0  -3   28.87    2.20
  -8   0  -3   30.84    2.33
  -8   0  -3   30.99    2.25
  -8   0  -3   30.64    2.69
   8   0   3   30.66    2.24
   8   0   3   31.77    2.64
   8   0   3   33.36    2.28
  -9   0  -3   19.57    2.04
  -9   0  -3   17.08    1.27
  -9   0  -3   17.79    1.36
  -9   0  -3   15.27    1.30
  -9   0  -3   16.87    1.47
   9   0   3   18.89    1.42
   9   0   3   16.39    1.41
   9   0   3   17.66    1.36
 -10   0  -3   84.49    5.77
 -10   0  -3   76.71    5.37
 -10   0  -3   77.38    5.36
  10   0   3   70.81    5.38
  10   0   3   76.96    5.39
  10   0   3   71.49    5.40
 -11   0  -3    0.19    0.23
 -11   0  -3    0.65    0.24
  11   0   3    0.86    0.47
 -12   0  -3   27.00    1.94
 -12   0  -3   26.79    1.94
  12   0   3   27.86    2.02
  10  -1  -3    0.40    0.32
 -10   1   3    0.38    0.17
   9  -1  -3   -0.84    0.45
  -9   1   3    0.03    0.15
  -9   1   3   -0.04    0.23
  -9   1   3    0.25    0.22
  -8   1   3   34.27    2.36
  -8   1   3   34.43    2.80
  -8   1   3   33.10    2.39
  -8   1   3   31.23    2.33
  -8   1   3   33.78    2.40
   7  -1  -3   -1.13    0.59
   7  -1  -3   -0.09    0.43
   7  -1  -3   -0.26    0.46
  -7   1   3    0.09    0.61
  -7   1   3    0.13    0.10
  -7   1   3   -0.03    0.32
  -7   1   3    0.28    0.24
  -7   1   3   -0.13    0.29
   6  -1  -3   76.71    5.62
   6  -1  -3   75.52    5.58
   6  -1  -3   82.26    5.57
  -6   1   3   77.57    5.53
  -6   1   3   74.71    5.51
  -6   1   3   82.51    5.76
  -6   1   3   82.21    5.55
   5  -1  -3   -0.41    0.38
   5  -1  -3    0.23    0.32
   5  -1  -3   -0.03    0.44
   5  -1  -3   -0.19    0.91
  -5   1   3    0.03    0.14
  -5   1   3    0.18    0.23
  -5   1   3    0.04    0.26
  -5   1   3   -0.05    0.49
  -4   1   3   32.12    2.30
  -4   1   3   27.23    2.09
  -4   1   3   30.54    2.11
   3  -1  -3    2.62    0.31
  -3   1   3    1.98    0.21
  -3   1   3    1.90    0.21
  -3   1   3    2.43    0.42
  -3   1   3    2.19    0.27
  -2   1   3  722.84   50.06
  -1   1   3  105.31    7.36
   0   1   3   61.36    4.32
  -1  -1  -3    9.54    0.66
   1   1   3    9.12    0.66
   1   1   3    9.38    0.66
  -2  -1  -3    5.93    0.47
  -2  -1  -3    6.22    0.47
  -2  -1  -3    7.18    0.49
   2   1   3    6.71    0.47
   2   1   3    6.45    0.47
  -3  -1  -3    2.70    0.38
  -3  -1  -3    1.76    0.18
  -3  -1  -3    1.88    0.18
  -3  -1  -3    2.02    0.25
   3   1   3    2.07    0.19
   3   1   3    2.36    0.33
   3   1   3    2.01    0.19
  -4  -1  -3  268.69   18.78
  -5  -1  -3  122.12    8.65
  -6  -1  -3  135.78    9.03
  -6  -1  -3  124.31    9.25
  -7  -1  -3   15.96    1.69
  -7  -1  -3   16.46    1.36
  -7  -1  -3   17.41    1.29
  -7  -1  -3   16.45    1.34
   7   1   3   18.28    1.25
   7   1   3   17.73    1.61
   7   1   3   14.59    1.24
   7   1   3   17.83    1.27
  -8  -1  -3   23.57    1.95
  -8  -1  -3   23.96    1.86
  -8  -1  -3   25.67    2.37
   8   1   3   27.60    2.33
   8   1   3   24.63    1.85
   8   1   3   25.92    1.84
   8   1   3   26.21    1.86
  -9  -1  -3   35.99    2.62
  -9  -1  -3   34.46    3.10
  -9  -1  -3   34.46    2.71
   9   1   3   37.18    2.62
   9   1   3   36.71    2.61
   9   1   3   37.02    2.63
 -10  -1  -3    9.60    0.79
 -10  -1  -3    8.35    0.74
 -10  -1  -3    7.36    0.83
 -10  -1  -3    9.58    1.71
  10   1   3    8.11    0.86
 -11  -1  -3   22.92    1.64
 -11  -1  -3   21.05    1.64
  11   1   3   22.74    1.75
 -12  -1  -3    0.59    0.19
 -12  -1  -3    0.54    0.17
  12   1   3    0.88    0.33
 -10   2   3    2.22    0.27
 -10   2   3    1.84    0.20
  -9   2   3    6.08    0.55
  -8   2   3   12.86    1.00
  -8   2   3   13.78    1.05
  -8   2   3   14.04    1.11
  -8   2   3   14.90    1.54
  -8   2   3   12.95    0.97
  -7   2   3   33.18    2.71
  -7   2   3   33.15    2.36
  -7   2   3   32.43    2.38
   6  -2  -3   70.96    5.48
   6  -2  -3   79.80    5.47
   6  -2  -3   73.13    5.51
  -6   2   3   81.63    5.64
  -6   2   3   71.43    5.39
  -6   2   3   78.83    5.41
  -6   2   3   77.81    5.42
  -6   2   3   84.30    5.45
   5  -2  -3   13.28    1.29
   5  -2  -3   15.89    1.24
  -5   2   3   16.73    1.48
  -5   2   3   15.88    1.17
  -5   2   3   15.29    1.16
   4  -2  -3    1.47    0.29
  -4   2   3    1.22    0.22
  -4   2   3    1.50    0.23
  -4   2   3    0.72    0.39
  -3   2   3  146.98   10.31
  -2   2   3   28.62    2.18
  -2   2   3   34.01    2.28
  -1   2   3  169.72   11.82
   0   2   3  116.05    8.11
  -2  -2  -3    9.45    0.69
  -2  -2  -3    9.25    0.68
   2   2   3    9.47    0.68
   2   2   3   10.36    0.69
  -3  -2  -3    2.64    0.46
  -3  -2  -3    3.27    0.32
  -3  -2  -3    3.08    0.26
   3   2   3    2.68    0.25
   3   2   3    3.35    0.35
   3   2   3    3.18    0.25
  -4  -2  -3   12.42    0.87
  -4  -2  -3   13.28    0.93
  -4  -2  -3   12.18    0.87
   4   2   3   10.63    0.87
   4   2   3   12.07    0.98
   4   2   3   11.50    0.86
  -5  -2  -3  233.60   16.38
  -6  -2  -3   65.11    4.41
  -6  -2  -3   56.81    4.43
  -6  -2  -3   70.41    4.48
  -6  -2  -3   64.12    4.40
  -6  -2  -3   67.99    4.47
   6   2   3   59.88    4.40
   6   2   3   57.66    4.41
  -7  -2  -3   14.97    1.24
  -7  -2  -3   15.91    1.27
  -7  -2  -3   14.04    1.14
  -7  -2  -3   17.62    1.32
  -7  -2  -3   14.56    1.15
   7   2   3   16.07    1.16
   7   2   3   16.11    1.18
   7   2   3   16.13    1.17
  -8  -2  -3    2.58    0.48
  -8  -2  -3    3.37    0.59
  -8  -2  -3    2.70    0.44
  -8  -2  -3    2.25    0.40
  -8  -2  -3    1.65    0.73
   8   2   3    3.39    0.81
   8   2   3    3.17    0.43
   8   2   3    3.64    0.46
   8   2   3    3.24    0.66
  -9  -2  -3    0.80    0.88
  -9  -2  -3    0.31    0.52
  -9  -2  -3    0.72    0.34
   9   2   3    1.35    0.68
   9   2   3    0.89    0.32
   9   2   3    0.40    0.85
 -10  -2  -3    4.54    0.68
 -10  -2  -3    5.76    1.20
 -10  -2  -3    4.68    0.56
  10   2   3    5.55    0.91
 -11  -2  -3   16.56    1.25
 -12  -2  -3    0.27    0.21
  12   2   3    0.35    0.46
  10  -3  -3    7.36    0.69
 -10   3   3    6.80    0.51
 -10   3   3    6.73    0.53
  -9   3   3   12.60    0.94
   8  -3  -3    3.49    0.52
  -8   3   3    2.27    0.31
  -8   3   3    2.33    0.39
  -8   3   3    2.56    0.25
  -8   3   3    2.29    0.38
  -7   3   3   84.14    5.87
   6  -3  -3    2.17    1.13
   6  -3  -3    1.48    0.47
   6  -3  -3    1.38    0.44
   6  -3  -3    0.97    0.55
  -6   3   3    1.88    0.33
  -6   3   3    1.51    0.32
  -6   3   3    2.26    0.63
  -6   3   3    1.18    0.21
  -6   3   3    1.55    0.30
   5  -3  -3    1.14    0.38
   5  -3  -3    0.80    0.41
   5  -3  -3    1.41    0.38
  -5   3   3    1.66    0.28
  -5   3   3    1.43    0.24
  -5   3   3    1.26    0.20
  -5   3   3    1.19    0.50
  -5   3   3    0.95    0.18
  -5   3   3    1.58    0.26
   4  -3  -3    1.16    0.31
   4  -3  -3    1.05    0.25
  -4   3   3    0.96    0.40
  -4   3   3    0.75    0.16
  -4   3   3    1.02    0.21
   3  -3  -3   64.34    4.53
  -3   3   3   63.88    4.51
  -3   3   3   66.04    4.61
  -2   3   3  229.01   15.93
   1  -3  -3    0.53    0.11
   1  -3  -3    0.76    0.13
   1  -3  -3    0.61    0.12
   0  -3  -3    2.45    0.28
   0  -3  -3    2.79    0.24
   0  -3  -3    3.07    0.29
   0   3   3    3.50    0.43
  -1  -3  -3    1.51    0.15
  -1  -3  -3    1.77    0.24
  -1  -3  -3    1.44    0.16
  -1  -3  -3    1.51    0.21
  -3  -3  -3    3.35    0.53
  -3  -3  -3    2.33    0.32
  -3  -3  -3    3.17    0.26
  -3  -3  -3    3.27    0.27
   3   3   3    2.82    0.38
   3   3   3    2.45    0.24
  -4  -3  -3   39.54    2.53
  -4  -3  -3   39.34    2.53
   4   3   3   32.53    2.51
   4   3   3   36.91    2.61
   4   3   3   32.03    2.52
  -5  -3  -3    1.37    0.46
  -5  -3  -3    2.57    0.29
  -5  -3  -3    1.84    0.31
  -5  -3  -3    1.85    0.33
   5   3   3    1.85    0.34
   5   3   3    2.04    0.24
   5   3   3    2.43    0.26
  -6  -3  -3   20.60    1.40
  -6  -3  -3   20.75    1.40
  -6  -3  -3   17.51    1.45
  -6  -3  -3   19.11    1.50
   6   3   3   18.49    1.38
   6   3   3   18.50    1.39
  -7  -3  -3   65.39    4.90
  -7  -3  -3   62.52    4.97
  -7  -3  -3   71.07    4.91
  -7  -3  -3   77.64    4.96
  -7  -3  -3   76.43    5.01
   7   3   3   67.32    4.90
   7   3   3   67.20    4.90
   7   3   3   66.00    5.06
   7   3   3   76.76    4.90
  -8  -3  -3   13.47    1.14
  -8  -3  -3   14.02    1.10
  -8  -3  -3   16.19    1.31
  -8  -3  -3   13.69    1.21
   8   3   3   14.51    1.11
  -9  -3  -3   17.92    1.57
  -9  -3  -3   20.22    1.69
  -9  -3  -3   21.70    1.56
 -10  -3  -3   72.79    5.13
 -10  -3  -3   68.75    5.16
  10   3   3   77.79    5.15
 -11  -3  -3    9.17    0.84
 -12  -3  -3    7.57    0.64
  12   3   3    8.07    0.97
  -9   4   3    0.90    0.22
  -9   4   3    1.11    0.17
  -9   4   3    1.26    0.20
  -8   4   3    7.86    0.66
  -8   4   3    8.60    0.62
  -8   4   3    8.25    0.67
  -8   4   3    7.81    0.76
   7  -4  -3   -0.63    0.50
   7  -4  -3   -0.22    0.42
   7  -4  -3    0.22    0.43
   7  -4  -3    0.53    0.97
  -7   4   3    0.55    0.53
  -7   4   3    0.56    0.20
  -7   4   3    0.49    0.12
  -7   4   3    0.86    0.22
  -7   4   3    0.59    0.20
  -7   4   3    0.33    0.30
  -7   4   3    0.29    0.14
   6  -4  -3   16.78    1.38
   6  -4  -3   13.88    1.39
   6  -4  -3   16.58    1.32
   6  -4  -3   19.61    2.29
  -6   4   3   14.68    1.13
   5  -4  -3    4.12    0.69
   5  -4  -3    4.12    0.55
   5  -4  -3    4.09    0.58
  -5   4   3    4.24    0.41
  -5   4   3    4.02    0.36
  -5   4   3    5.14    0.52
   4  -4  -3    1.17    0.27
   4  -4  -3    1.90    0.35
  -4   4   3    2.11    0.47
  -4   4   3    1.46    0.24
  -4   4   3    1.77    0.27
  -4   4   3    1.57    0.26
  -4   4   3    1.76    0.28
   3  -4  -3   29.37    2.34
   3  -4  -3   34.29    2.33
  -3   4   3   33.96    2.32
  -3   4   3   34.34    2.44
   0  -4  -3    0.70    0.16
   0  -4  -3    0.56    0.11
   0  -4  -3    0.88    0.16
   0   4   3    0.95    0.25
  -1  -4  -3    2.78    0.25
  -1  -4  -3    2.69    0.33
  -1  -4  -3    2.76    0.25
  -1  -4  -3    3.39    0.35
   1   4   3    3.58    0.44
  -2  -4  -3   15.26    1.00
  -2  -4  -3   12.52    1.03
  -4  -4  -3   46.42    3.60
  -4  -4  -3   51.52    3.51
  -4  -4  -3   54.17    3.51
   4   4   3   48.03    3.60
  -5  -4  -3  225.14   16.07
  -6  -4  -3   56.71    4.06
  -6  -4  -3   51.26    4.15
  -6  -4  -3   62.72    4.15
  -6  -4  -3   54.50    4.06
   6   4   3   63.76    4.23
  -7  -4  -3   26.52    2.21
  -7  -4  -3   31.11    2.11
  -7  -4  -3   30.11    2.25
  -7  -4  -3   29.99    2.11
   7   4   3   27.80    2.09
   7   4   3   32.85    2.31
   7   4   3   26.61    2.08
  -8  -4  -3    2.32    0.45
  -8  -4  -3    2.99    0.39
  -8  -4  -3    2.50    0.46
  -8  -4  -3    3.45    0.65
  -8  -4  -3    2.30    0.38
  -8  -4  -3    3.11    0.37
   8   4   3    4.22    0.81
  -9  -4  -3  110.42    7.94
  -9  -4  -3  108.54    7.91
  -9  -4  -3  117.13    7.86
 -10  -4  -3    0.12    0.30
 -11  -4  -3   37.64    2.70
 -12  -4  -3    3.62    0.37
  12   4   3    3.37    0.55
  -9   5   3    0.20    0.11
  -9   5   3    0.20    0.16
  -9   5   3    0.25    0.13
   8  -5  -3    0.66    0.38
  -8   5   3    0.53    0.19
  -8   5   3    0.47    0.11
  -8   5   3    0.30    0.16
  -8   5   3    0.22    0.27
  -8   5   3    0.37    0.15
   7  -5  -3   24.21    1.73
  -7   5   3   21.96    1.64
  -7   5   3   24.00    1.54
  -7   5   3   19.51    1.52
  -7   5   3   18.78    1.54
  -7   5   3   20.64    1.52
   6  -5  -3    7.22    0.92
   6  -5  -3   10.69    1.52
   6  -5  -3    7.54    0.88
   6  -5  -3    9.11    0.98
  -6   5   3    8.43    0.71
  -6   5   3    9.73    0.71
  -6   5   3    8.12    0.67
  -6   5   3   10.40    0.84
   5  -5  -3   15.33    1.42
   5  -5  -3   17.72    1.34
  -5   5   3   18.02    1.25
  -5   5   3   17.81    1.25
   4  -5  -3   17.03    1.31
  -4   5   3   18.87    1.23
  -4   5   3   15.69    1.22
  -4   5   3   16.79    1.30
  -4   5   3   16.86    1.23
   3  -5  -3    3.74    0.48
   3  -5  -3    4.84    0.42
  -3   5   3    4.31    0.40
  -3   5   3    4.64    0.48
  -3   5   3    5.25    0.66
  -2   5   3    6.45    0.66
  -1   5   3  168.06   11.79
   0  -5  -3   12.42    0.95
   0  -5  -3   12.62    0.95
  -1  -5  -3    5.19    0.40
  -1  -5  -3    4.61    0.50
  -1  -5  -3    4.90    0.41
  -1  -5  -3    5.83    0.52
  -2  -5  -3    2.20    0.36
  -2  -5  -3    1.86    0.24
  -2  -5  -3    2.17    0.24
  -2  -5  -3    2.22    0.30
  -3  -5  -3    3.62    0.34
  -3  -5  -3    3.04    0.33
  -3  -5  -3    2.82    0.46
   3   5   3    2.38    0.43
  -4  -5  -3   11.11    0.85
  -4  -5  -3   11.97    0.86
  -4  -5  -3    9.93    1.03
   4   5   3   10.44    1.05
   5   5   3  398.91   27.80
  -6  -5  -3   10.19    0.87
  -6  -5  -3   10.36    1.06
  -6  -5  -3   11.91    1.04
  -6  -5  -3   10.32    0.88
   6   5   3    9.83    1.05
   6   5   3   11.36    1.19
  -7  -5  -3   40.62    3.07
  -7  -5  -3   43.28    3.20
  -7  -5  -3   43.65    3.08
  -7  -5  -3   47.05    3.07
  -7  -5  -3   40.33    3.20
  -8  -5  -3    3.95    0.48
  -8  -5  -3    2.70    0.41
  -8  -5  -3    4.56    0.52
  -8  -5  -3    3.71    0.58
  -8  -5  -3    3.14    0.68
  -9  -5  -3   15.98    1.25
  -9  -5  -3   17.10    1.38
  -9  -5  -3   15.17    1.24
  -9  -5  -3   15.19    1.44
 -10  -5  -3   22.13    1.67
 -11  -5  -3   21.30    1.58
  -8   6   3    3.42    0.47
  -8   6   3    3.81    0.36
  -8   6   3    3.72    0.31
  -7   6   3   53.07    3.42
  -7   6   3   45.92    3.51
  -7   6   3   46.33    3.43
  -7   6   3   51.09    3.46
   6  -6  -3    5.89    0.77
   6  -6  -3    7.74    1.28
   6  -6  -3    5.76    0.83
   6  -6  -3    7.05    0.87
  -6   6   3    6.75    0.73
  -6   6   3    7.48    0.60
  -6   6   3    7.13    0.61
  -6   6   3    6.78    0.56
  -6   6   3    8.24    0.60
   5  -6  -3    6.78    0.89
   5  -6  -3    6.87    0.79
  -5   6   3    9.02    0.81
  -5   6   3    8.95    0.71
  -5   6   3    9.11    0.69
  -5   6   3    9.36    0.69
  -5   6   3    8.55    0.66
   4  -6  -3    4.93    0.59
  -4   6   3    5.20    0.43
  -4   6   3    4.94    0.48
  -4   6   3    5.13    0.58
   3  -6  -3    6.89    0.58
  -3   6   3    8.11    0.60
  -3   6   3    6.54    0.54
  -3   6   3    6.84    0.66
  -2   6   3   45.93    3.15
  -2   6   3   44.46    3.18
  -2   6   3   41.61    3.14
  -2   6   3   48.28    3.15
  -1   6   3   58.99    4.11
   0  -6  -3    5.85    0.55
   0  -6  -3    6.10    0.60
  -1  -6  -3   15.65    1.32
  -1  -6  -3   16.81    1.34
   1   6   3   19.49    1.36
  -2  -6  -3   12.49    1.07
  -2  -6  -3   13.54    1.11
  -3  -6  -3   81.97    5.36
  -3  -6  -3   68.43    5.26
  -4  -6  -3    9.46    0.72
  -4  -6  -3    8.10    0.94
  -4  -6  -3    9.16    0.71
   4   6   3    7.58    0.78
   4   6   3    6.54    1.03
  -5  -6  -3   92.08    6.63
  -5  -6  -3   93.57    6.64
  -5  -6  -3   98.05    6.79
  -5  -6  -3  102.76    6.64
   5   6   3   88.75    6.80
  -6  -6  -3    5.00    0.69
  -6  -6  -3    6.29    0.61
  -6  -6  -3    5.44    0.62
  -6  -6  -3    5.46    0.79
  -6  -6  -3    5.43    0.82
   6   6   3    5.14    0.80
  -7  -6  -3  115.51    7.69
  -7  -6  -3  110.14    7.70
  -7  -6  -3  104.43    7.69
  -7  -6  -3  110.61    7.84
  -8  -6  -3    7.09    0.78
  -8  -6  -3    7.46    0.90
  -8  -6  -3    7.69    0.71
  -8  -6  -3    6.67    0.72
  -9  -6  -3    3.74    0.62
 -10  -6  -3    4.56    0.60
 -10  -6  -3    5.02    0.58
  11   6   3    2.09    0.46
  -8   7   3    9.70    0.81
  -8   7   3    9.98    0.76
  -8   7   3   11.21    0.75
   7  -7  -3    5.86    0.69
  -7   7   3    5.10    0.44
  -7   7   3    4.99    0.60
  -7   7   3    6.37    0.46
   6  -7  -3   17.74    1.50
  -6   7   3   17.77    1.35
  -6   7   3   20.32    1.35
  -6   7   3   18.16    1.33
  -6   7   3   16.44    1.44
  -6   7   3   20.28    1.34
   5  -7  -3    0.68    0.30
   5  -7  -3    0.95    0.34
  -5   7   3    0.88    0.15
  -5   7   3    0.69    0.17
  -5   7   3    1.22    0.21
  -5   7   3    0.98    0.17
  -5   7   3    0.76    0.34
  -5   7   3    0.64    0.20
  -4   7   3    0.67    0.19
  -4   7   3    0.63    0.13
  -4   7   3    0.42    0.29
  -4   7   3    0.53    0.16
  -4   7   3    0.67    0.19
  -3   7   3   55.48    4.10
  -3   7   3   60.56    4.04
  -3   7   3   57.34    4.03
  -2   7   3   35.80    2.73
  -2   7   3   38.69    2.73
  -2   7   3   41.12    2.74
  -2   7   3   39.19    2.73
  -2   7   3   37.86    2.74
  -2   7   3   41.34    2.80
  -1   7   3   10.88    0.80
  -1   7   3    9.78    0.82
  -1   7   3    9.56    0.86
  -1   7   3   11.66    0.80
  -1   7   3   11.39    0.82
  -1   7   3   11.78    0.83
   0  -7  -3    9.25    0.90
   0  -7  -3    9.66    0.96
   0   7   3   11.37    0.81
   0   7   3   10.96    0.80
   0   7   3   12.23    0.88
   0   7   3   12.00    0.84
   0   7   3   10.77    0.83
  -1  -7  -3   43.68    3.25
  -1  -7  -3   46.56    3.29
   1   7   3   45.71    3.15
  -2  -7  -3    4.79    0.72
  -2  -7  -3    5.31    0.66
   2   7   3    3.56    0.61
   2   7   3    3.72    0.44
   2   7   3    4.45    0.77
   2   7   3    4.40    0.44
   2   7   3    5.91    0.85
   2   7   3    4.66    0.36
  -3  -7  -3   44.38    3.34
  -3  -7  -3   51.26    3.44
   3   7   3   46.67    3.49
   3   7   3   47.08    3.31
  -4  -7  -3   33.03    2.40
  -4  -7  -3   32.59    2.28
   4   7   3   29.78    2.24
  -5  -7  -3    9.81    0.89
  -5  -7  -3   10.68    1.13
  -5  -7  -3   10.93    0.90
  -5  -7  -3   11.11    0.92
  -5  -7  -3   11.14    1.11
   5   7   3   11.04    0.86
   5   7   3   10.39    0.99
  -6  -7  -3    5.58    0.93
  -6  -7  -3    5.84    0.64
  -6  -7  -3    6.23    0.89
  -6  -7  -3    6.25    0.67
  -6  -7  -3    6.40    0.67
   6   7   3    5.76    0.83
   6   7   3    7.20    0.63
  -7  -7  -3    8.32    0.80
  -7  -7  -3    8.54    0.98
  -7  -7  -3    9.15    0.76
  -7  -7  -3    7.70    0.76
   7   7   3    7.41    0.64
  -8  -7  -3    1.12    0.46
  -8  -7  -3    0.81    0.29
  -8  -7  -3    0.56    0.37
  -8  -7  -3    0.00    0.37
   8   7   3    1.26    0.46
   9   7   3   25.79    1.85
  10   7   3    1.26    0.26
  10   7   3    1.28    0.41
   7  -8  -3    1.27    0.23
  -7   8   3    1.66    0.18
  -7   8   3    1.28    0.28
  -7   8   3    1.88    0.22
   6  -8  -3    9.82    0.93
  -6   8   3   11.17    0.78
  -6   8   3   10.42    0.79
  -5   8   3   10.22    0.78
  -5   8   3   10.89    0.77
  -5   8   3    9.15    0.90
  -5   8   3   10.15    0.78
  -4   8   3    0.03    0.17
  -4   8   3    0.15    0.15
  -4   8   3    0.08    0.13
  -4   8   3    0.19    0.18
  -4   8   3    0.14    0.30
  -3   8   3   36.32    2.78
  -3   8   3   38.42    2.70
  -3   8   3   39.42    2.71
  -3   8   3   39.63    2.71
  -2   8   3    2.46    0.30
  -2   8   3    2.89    0.40
  -2   8   3    2.10    0.29
  -2   8   3    1.75    0.38
  -2   8   3    1.87    0.28
  -2   8   3    2.64    0.38
  -1   8   3    8.88    0.80
  -1   8   3    8.79    0.69
  -1   8   3    9.59    0.75
  -1   8   3    9.26    0.74
  -1   8   3    8.32    0.78
  -1   8   3   10.28    0.71
   0  -8  -3   12.50    1.20
   0   8   3   15.08    1.06
   0   8   3   13.63    1.08
   0   8   3   14.29    1.05
   0   8   3   14.94    1.03
   0   8   3   14.38    1.10
  -1  -8  -3    2.09    0.49
  -1  -8  -3    2.53    0.45
   1   8   3    3.20    0.62
   1   8   3    2.94    0.36
   1   8   3    2.79    0.40
   1   8   3    3.26    0.29
  -2  -8  -3   41.43    2.85
   2   8   3   37.49    2.68
   2   8   3   38.29    2.68
   2   8   3   35.31    2.94
  -3  -8  -3   16.28    1.14
   3   8   3   16.03    1.09
   3   8   3   13.43    1.06
   3   8   3   13.74    1.13
   3   8   3   14.56    1.49
  -4  -8  -3    1.20    0.49
  -4  -8  -3    0.47    0.42
  -4  -8  -3    0.58    0.29
  -4  -8  -3    1.17    0.28
   4   8   3    0.32    0.12
   4   8   3    0.16    0.26
   4   8   3    0.50    0.17
   4   8   3   -0.07    0.48
  -5  -8  -3   78.39    5.35
  -5  -8  -3   74.47    5.25
  -5  -8  -3   72.70    5.17
  -5  -8  -3   70.65    5.17
   5   8   3   73.00    5.13
  -6  -8  -3   12.19    1.19
  -6  -8  -3   11.79    0.96
  -6  -8  -3   11.35    0.98
  -6  -8  -3   13.15    1.19
   6   8   3   10.45    0.87
   6   8   3   12.60    1.05
  -7  -8  -3    3.18    0.55
  -7  -8  -3    2.19    0.54
  -7  -8  -3    2.43    0.36
   7   8   3    3.00    0.47
   7   8   3    3.13    0.35
   8   8   3    2.76    0.37
   8   8   3    2.47    0.45
   9   8   3    4.53    0.70
   9   8   3    5.65    0.51
 -10  -8  -3   41.48    2.91
  -6   9   3    0.92    0.25
  -6   9   3    1.12    0.15
  -6   9   3    1.03    0.13
  -5   9   3   11.64    0.83
  -5   9   3   10.83    0.83
  -4   9   3    0.07    0.12
  -4   9   3   -0.12    0.14
  -4   9   3    0.15    0.14
  -4   9   3   -0.09    0.28
  -4   9   3   -0.03    0.17
  -3   9   3    2.23    0.27
  -3   9   3    2.21    0.28
  -3   9   3    1.58    0.23
  -3   9   3    1.64    0.35
  -3   9   3    1.52    0.21
  -3   9   3    2.14    0.28
  -2   9   3    0.42    0.15
  -2   9   3    0.38    0.18
  -2   9   3    0.63    0.49
  -2   9   3    0.34    0.17
  -2   9   3    0.73    0.29
  -2   9   3    0.86    0.18
  -2   9   3    0.30    0.19
  -1   9   3    4.34    0.50
  -1   9   3    5.32    0.96
  -1   9   3    5.05    0.42
  -1   9   3    4.96    0.51
  -1   9   3    5.14    0.56
  -1   9   3    4.30    0.57
   0   9   3    4.96    0.52
   0   9   3    5.11    0.58
   0   9   3    5.24    0.58
   0   9   3    5.31    1.03
   0   9   3    6.06    0.55
   0   9   3    5.92    0.46
  -1  -9  -3    8.46    0.94
  -1  -9  -3    4.78    0.88
   1   9   3    5.47    1.11
   1   9   3    6.54    0.51
   1   9   3    6.71    0.61
   1   9   3    6.47    0.56
   1   9   3    6.81    0.60
  -2  -9  -3   25.90    1.89
  -2  -9  -3   26.26    1.86
   2   9   3   21.09    1.62
   2   9   3   20.04    2.00
   2   9   3   22.57    1.67
   2   9   3   24.35    1.64
   2   9   3   21.62    1.63
  -3  -9  -3    1.28    0.43
  -3  -9  -3    1.72    0.53
   3   9   3    0.92    0.16
   3   9   3    0.92    0.18
   3   9   3    1.09    0.18
  -4  -9  -3   59.57    4.19
  -4  -9  -3   62.67    4.18
   4   9   3   56.03    4.14
  -5  -9  -3   44.11    3.14
  -5  -9  -3   46.38    3.26
  -5  -9  -3   41.71    3.14
   5   9   3   44.55    3.10
  -6  -9  -3   36.83    2.64
   6   9   3   37.04    2.83
   7   9   3   14.92    1.08
   8   9   3   43.03    3.17
   8   9   3   46.37    3.13
   9   9   3   19.04    1.58
   9   9   3   24.07    1.54
  -5  10   3    3.81    0.30
  -5  10   3    3.32    0.30
  -5  10   3    3.22    0.44
  -4  10   3    0.38    0.13
  -4  10   3    0.44    0.12
  -4  10   3    0.34    0.26
  -4  10   3    0.18    0.13
  -4  10   3    0.34    0.14
  -3  10   3    5.84    0.55
  -3  10   3    5.50    0.64
  -3  10   3    6.57    0.55
  -3  10   3    6.60    0.50
  -2  10   3    4.76    0.48
  -2  10   3    4.87    0.57
  -2  10   3    4.42    0.40
  -2  10   3    4.49    0.48
  -1  10   3    6.15    0.64
  -1  10   3    6.47    0.51
  -1  10   3    6.41    0.97
  -1  10   3    5.89    0.58
   0  10   3   20.71    1.55
   0  10   3   20.66    1.47
   0  10   3   21.04    1.50
   0  10   3   21.16    1.49
   0  10   3   19.44    1.80
   1  10   3   -0.21    0.16
   1  10   3    0.18    0.15
   1  10   3   -0.78    0.52
   1  10   3   -0.23    0.17
  -2 -10  -3    0.77    0.52
   2  10   3    0.58    0.17
   2  10   3    0.96    0.16
   2  10   3    0.74    0.17
  -3 -10  -3    0.90    0.50
  -3 -10  -3    1.40    0.50
   3  10   3   -0.13    0.58
   3  10   3    0.99    0.17
   3  10   3    0.91    0.17
   4  10   3   65.51    4.34
   4  10   3   58.88    4.57
   5  10   3   13.82    1.40
  -6 -10  -3   27.90    2.20
   6  10   3   34.36    2.40
  -7 -10  -3    0.35    0.25
   7  10   3   -0.16    0.36
   7  10   3    0.17    0.14
   8  10   3    7.44    0.58
  -4  11   3    2.67    0.26
  -4  11   3    2.35    0.23
  -3  11   3    2.60    0.39
  -3  11   3    2.78    0.31
  -3  11   3    2.36    0.33
  -3  11   3    3.01    0.27
  -2  11   3    4.80    0.49
  -2  11   3    3.61    0.42
  -2  11   3    4.80    0.41
  -2  11   3    4.02    0.36
  -1  11   3   19.37    1.45
  -1  11   3   21.22    1.47
  -1  11   3   21.07    1.52
   0  11   3   12.48    1.01
   0  11   3   11.92    1.28
   0  11   3   14.01    0.98
   0  11   3   15.11    1.00
   1  11   3    0.11    0.14
   1  11   3    0.01    0.48
   1  11   3   -0.08    0.16
   2  11   3   23.55    1.62
   2  11   3   19.43    1.91
   2  11   3   24.68    1.61
   2  11   3   22.04    1.60
   3  11   3    0.52    0.51
  -4 -11  -3   -0.32    0.25
   4  11   3   -0.24    0.47
   5  11   3   28.13    2.19
  -6 -11  -3    0.42    0.22
   6  11   3    0.57    0.13
   6  11   3    0.10    0.36
  -7 -11  -3    0.15    0.19
   7  11   3    0.02    0.26
   7  11   3    0.35    0.12
  -2  12   3    5.69    0.40
  -2  12   3    4.43    0.43
  -1  12   3    4.54    0.35
  -1  12   3    3.95    0.34
  -1  12   3    4.49    0.36
   0  12   3    5.48    0.42
   0  12   3    4.89    0.47
   0  12   3    5.97    0.44
   1  12   3    6.91    0.90
   1  12   3    8.36    0.65
   1  12   3    9.04    0.62
   2  12   3    6.20    0.54
   2  12   3    6.83    0.50
   3  12   3    1.73    0.29
   3  12   3    2.09    0.22
   4  12   3    5.27    0.41
   5  12   3    3.39    0.29
   2  12  -4    1.10    0.39
   2  12  -4    1.48    0.16
   2  12  -4    1.12    0.14
   1  12  -4    1.10    0.29
   1  12  -4    0.99    0.15
   1  12  -4    1.13    0.31
   1  12  -4    0.82    0.34
   1  12  -4    0.69    0.14
   0  12  -4    0.29    0.13
   0  12  -4    0.33    0.29
   0  12  -4    0.23    0.13
   0  12  -4    0.38    0.30
  -1  12  -4    1.35    0.31
  -1  12  -4    2.19    0.24
  -2  12  -4    2.14    0.25
   4  11  -4    0.76    0.16
   4  11  -4    0.79    0.48
   3  11  -4    8.51    0.74
   3  11  -4    9.47    1.32
   3  11  -4    9.60    0.92
   3  11  -4    7.57    0.62
   2  11  -4    9.18    1.32
   2  11  -4    9.27    0.94
   2  11  -4    7.61    0.75
   2  11  -4    7.83    0.62
   1  11  -4    4.38    0.39
   1  11  -4    4.65    0.78
   1  11  -4    2.91    0.79
   1  11  -4    3.45    0.57
   0  11  -4    5.75    0.63
   0  11  -4    6.44    0.84
   0  11  -4    4.71    0.89
   0  11  -4    4.78    0.70
  -1  11  -4    0.43    0.38
  -1  11  -4   -0.08    0.17
  -1  11  -4   -0.06    0.61
  -1  11  -4    0.05    0.21
  -1  11  -4    0.12    0.31
  -1  11  -4    0.40    0.30
  -1  11  -4    0.23    0.36
  -2  11  -4    0.55    0.30
  -2  11  -4    0.68    0.16
  -2  11  -4    0.15    0.28
  -2  11  -4    0.64    0.22
  -2  11  -4    0.11    0.35
  -2  11  -4    0.00    0.64
  -2  11  -4    0.72    0.21
  -3  11  -4    0.37    0.64
  -3  11  -4    0.96    0.32
  -3  11  -4    1.02    0.21
  -3  11  -4    0.62    0.35
  -4  11  -4    1.08    0.26
  -5  11  -4    1.24    0.22
  -6  11  -4    2.22    0.27
   6  10  -4    1.02    0.33
  -6 -10   4    0.99    0.21
   5  10  -4   14.31    1.17
   5  10  -4   16.56    1.30
  -5 -10   4   15.13    1.14
   4  10  -4   10.84    0.80
   4  10  -4   10.57    0.94
  -4 -10   4   11.30    0.87
   3  10  -4    6.17    0.82
   3  10  -4    5.87    0.48
   3  10  -4    4.71    0.96
   2  10  -4    0.90    0.51
   2  10  -4    0.26    0.38
   2  10  -4    0.72    0.67
   2  10  -4    0.25    0.18
   2  10  -4    0.37    0.39
   1  10  -4    0.91    0.65
   1  10  -4    0.85    0.42
   1  10  -4    1.55    0.51
   1  10  -4    1.43    0.23
   1  10  -4    0.90    0.40
   1  10  -4    1.05    0.41
   0  10  -4    6.86    0.56
   0  10  -4    6.12    0.95
   0  10  -4    6.46    0.77
   0  10  -4    6.54    1.17
   0  10  -4    6.15    0.65
  -1  10  -4    1.11    0.37
  -1  10  -4    1.41    0.44
  -1  10  -4    1.25    0.36
  -1  10  -4    0.75    0.68
  -1  10  -4    1.12    0.28
  -1  10  -4    1.35    0.46
  -1  10  -4    1.14    0.36
  -1  10  -4    1.84    0.28
  -2  10  -4    6.64    0.64
  -2  10  -4    5.28    0.68
  -2  10  -4    6.49    0.56
  -2  10  -4    5.12    0.63
  -2  10  -4    5.15    0.70
  -2  10  -4    5.59    0.70
  -2  10  -4    6.68    0.55
  -2  10  -4    5.59    0.68
  -2  10  -4    6.94    1.09
  -2  10  -4    5.66    1.00
  -3  10  -4    3.20    0.49
  -3  10  -4    3.66    0.51
  -3  10  -4    3.98    0.58
  -3  10  -4    4.20    0.49
  -3  10  -4    3.09    0.42
  -3  10  -4    3.67    0.90
  -3  10  -4    2.95    0.46
  -4  10  -4    5.41    0.54
  -4  10  -4    5.38    0.64
  -4  10  -4    5.53    0.99
  -4  10  -4    4.86    0.51
  -4  10  -4    4.35    0.53
  -5  10  -4    0.01    0.30
  -5  10  -4    0.33    0.19
  -5  10  -4    0.07    0.18
  -5  10  -4    0.48    0.18
  -5  10  -4    0.59    0.20
  -5  10  -4    0.64    0.22
  -5  10  -4    0.07    0.28
  -5  10  -4    0.34    0.17
  -6  10  -4    2.68    0.34
  -6  10  -4    3.66    0.35
  -6  10  -4    2.46    0.33
  -6  10  -4    2.69    0.47
  -7  10  -4    1.61    0.24
  -7  10  -4    1.45    0.22
  -7  10  -4    1.63    0.27
   7   9  -4    4.39    0.51
  -7  -9   4    3.51    0.42
   6   9  -4    0.57    0.39
   6   9  -4    0.33    0.51
  -6  -9   4    0.66    0.26
   5   9  -4    9.27    1.05
  -5  -9   4    9.94    0.82
   4   9  -4   24.74    1.84
   4   9  -4   28.69    2.04
   4   9  -4   23.66    1.92
  -4  -9   4   27.51    1.90
   3   9  -4   25.48    2.21
   3   9  -4   23.81    1.86
   3   9  -4   22.38    2.12
   3   9  -4   21.56    1.76
   3   9  -4   24.48    1.67
   3   9  -4   21.35    1.91
  -3  -9   4   25.81    2.13
   2   9  -4   12.78    1.17
   2   9  -4   14.88    1.04
   2   9  -4   14.04    1.27
   2   9  -4   13.01    1.26
   2   9  -4   15.66    1.53
  -2  -9   4   13.41    1.42
   1   9  -4   19.08    1.54
   1   9  -4   19.11    1.63
   1   9  -4   22.01    1.95
   1   9  -4   19.69    1.83
   1   9  -4   17.57    1.60
   1   9  -4   20.75    1.55
   1   9  -4   21.59    1.44
  -1  -9   4   18.34    1.74
   0   9  -4    2.47    0.36
   0   9  -4    2.07    0.31
   0   9  -4    2.21    0.66
   0   9  -4    1.71    0.41
   0   9  -4    2.08    0.41
   0   9  -4    1.66    0.42
   0   9  -4    2.74    0.55
   0   9  -4    2.25    0.46
   0  -9   4    2.54    0.52
  -1   9  -4    5.32    0.48
  -1   9  -4    4.29    0.60
  -1   9  -4    3.50    0.53
  -1   9  -4    4.08    0.62
  -1   9  -4    4.61    0.61
  -1   9  -4    3.35    0.56
  -1   9  -4    4.31    0.63
  -1   9  -4    4.90    0.47
  -1   9  -4    5.93    1.20
  -1   9  -4    4.54    0.84
  -1   9  -4    4.09    0.79
   1  -9   4    4.25    0.68
  -2   9  -4   13.99    1.20
  -2   9  -4   15.10    1.16
  -2   9  -4   12.31    1.20
  -2   9  -4   15.46    1.34
  -2   9  -4   14.69    1.18
  -2   9  -4   15.77    1.62
  -2   9  -4   15.81    1.11
  -2   9  -4   14.04    1.24
  -2   9  -4   14.93    1.12
  -2   9  -4   13.65    1.21
  -3   9  -4   31.28    2.26
  -3   9  -4   28.78    2.32
  -3   9  -4   32.83    2.27
  -3   9  -4   30.21    2.32
  -3   9  -4   33.42    2.72
  -3   9  -4   31.87    2.34
  -3   9  -4   32.76    2.45
  -3   9  -4   28.21    2.30
  -3   9  -4   32.88    2.24
  -3   9  -4   34.02    2.39
  -4   9  -4    0.84    0.20
  -4   9  -4    1.62    0.36
  -4   9  -4    0.68    0.26
  -4   9  -4    0.89    0.40
  -4   9  -4    0.87    0.27
  -4   9  -4    1.45    0.26
  -4   9  -4    1.56    0.82
  -4   9  -4    1.00    0.25
  -4   9  -4    0.67    0.23
  -4   9  -4    1.03    0.22
  -4   9  -4    0.63    0.24
  -5   9  -4   19.59    1.72
  -5   9  -4   23.25    1.61
  -5   9  -4   21.55    1.60
  -5   9  -4   21.86    1.60
  -5   9  -4   23.23    1.62
  -6   9  -4    1.68    0.37
  -6   9  -4    0.86    0.19
  -6   9  -4    1.07    0.22
  -6   9  -4    0.66    0.40
  -6   9  -4    1.37    0.25
  -6   9  -4    0.86    0.24
  -6   9  -4    0.96    0.19
  -7   9  -4    6.70    0.54
  -7   9  -4    5.85    0.54
  -7   9  -4    5.19    0.71
  -7   9  -4    5.90    0.53
  -7   9  -4    7.05    0.52
  -8   9  -4    6.49    0.48
  -8   9  -4    6.47    0.49
  -8   9  -4    5.60    0.48
  -8   9  -4    5.46    0.50
   7   8  -4   37.16    2.62
   7   8  -4   40.05    2.76
  -7  -8   4   33.32    2.60
   6   8  -4   20.33    1.68
  -6  -8   4   24.61    1.67
   5   8  -4    0.14    0.16
   5   8  -4    0.25    0.40
   5   8  -4    0.50    0.49
  -5  -8   4    0.22    0.26
   4   8  -4   30.18    2.41
   4   8  -4   28.78    2.32
   4   8  -4   32.25    2.25
   4   8  -4   31.15    2.65
  -4  -8   4   32.60    2.34
  -4  -8   4   35.59    2.69
  -4  -8   4   34.06    2.34
  -4  -8   4   33.17    2.32
   3   8  -4    3.22    0.55
   3   8  -4    4.05    0.38
   3   8  -4    3.84    0.73
   3   8  -4    3.82    0.73
   3   8  -4    4.71    0.66
   3   8  -4    2.59    0.64
  -3  -8   4    5.15    0.86
  -3  -8   4    3.66    0.53
  -3  -8   4    3.57    0.45
  -3  -8   4    3.27    0.49
   2   8  -4   75.47    5.74
   2   8  -4   82.17    5.87
   2   8  -4   79.69    5.91
   2   8  -4   88.80    5.68
  -2  -8   4   79.63    5.70
   1   8  -4    1.03    0.37
   1   8  -4    1.10    0.53
   1   8  -4    1.07    0.35
   1   8  -4    1.14    0.37
   1   8  -4    1.58    0.35
   1   8  -4    1.07    0.20
  -1  -8   4    1.03    0.31
   0   8  -4   28.40    2.32
   0   8  -4   30.73    2.52
   0   8  -4   30.94    2.34
   0   8  -4   28.65    2.36
   0   8  -4   27.67    2.34
   0   8  -4   33.69    2.22
   0   8  -4   31.37    2.37
   0   8  -4   34.94    2.25
   0   8  -4   33.19    2.53
   0   8  -4   33.31    2.35
   0  -8   4   31.11    2.27
  -1   8  -4    0.51    0.19
  -1   8  -4    0.48    0.24
  -1   8  -4    0.21    0.28
  -1   8  -4    0.76    0.27
  -1   8  -4    0.52    0.46
  -1   8  -4    0.63    0.52
  -1   8  -4    0.40    0.23
  -1   8  -4    0.49    0.34
  -1   8  -4    0.20    0.25
  -1   8  -4    0.54    0.19
  -1   8  -4    0.58    0.28
   1  -8   4    0.40    0.28
  -2   8  -4    3.43    0.50
  -2   8  -4    2.08    0.32
  -2   8  -4    2.82    0.44
  -2   8  -4    3.11    0.45
  -2   8  -4    2.27    0.49
  -2   8  -4    3.44    0.54
  -2   8  -4    3.19    0.38
  -2   8  -4    3.54    0.72
  -2   8  -4    2.74    0.40
  -2   8  -4    2.70    0.40
   2  -8   4    2.96    0.41
  -3   8  -4   31.76    2.25
  -3   8  -4   27.76    2.29
  -3   8  -4   34.06    2.41
  -3   8  -4   31.27    2.24
  -3   8  -4   33.38    2.34
  -3   8  -4   32.82    2.22
  -3   8  -4   28.25    2.33
  -3   8  -4   33.06    2.25
  -3   8  -4   27.17    2.22
  -3   8  -4   31.39    2.28
  -3   8  -4   32.35    2.27
  -3   8  -4   33.03    2.31
   3  -8   4   29.78    2.27
  -4   8  -4   57.05    3.86
  -4   8  -4   51.96    3.76
  -4   8  -4   54.29    3.80
  -4   8  -4   59.76    3.78
  -4   8  -4   55.83    3.82
  -4   8  -4   51.42    3.80
  -4   8  -4   52.01    3.82
  -4   8  -4   47.96    3.89
  -4   8  -4   54.64    3.79
  -5   8  -4   45.97    3.08
  -5   8  -4   39.86    3.07
  -5   8  -4   48.15    3.05
  -5   8  -4   38.34    3.06
  -5   8  -4   45.66    3.06
  -5   8  -4   41.60    3.08
  -6   8  -4   23.57    2.12
  -6   8  -4   27.29    1.97
  -6   8  -4   26.48    1.97
  -6   8  -4   30.51    1.99
  -6   8  -4   28.41    1.98
  -7   8  -4    0.29    0.20
  -7   8  -4    0.51    0.25
  -7   8  -4    0.17    0.19
  -7   8  -4    0.57    0.29
  -7   8  -4    0.31    0.24
  -7   8  -4    0.38    0.44
  -7   8  -4    0.33    0.16
  -7   8  -4    0.14    0.14
  -8   8  -4   18.44    1.37
  -8   8  -4   20.04    1.37
  -8   8  -4   19.42    1.38
  -8   8  -4   17.44    1.36
  -9   8  -4    0.56    0.15
  -9   8  -4    0.56    0.27
  -9   8  -4    0.73    0.12
  -9   8  -4    0.73    0.12
  -9   8  -4    0.96    0.18
   8   7  -4   88.89    6.26
   8   7  -4   90.69    6.35
   7   7  -4    3.50    0.75
   7   7  -4    2.55    0.30
   6   7  -4    9.61    1.12
   6   7  -4    7.87    1.12
   6   7  -4    7.34    1.37
  -6  -7   4   10.48    0.84
   5   7  -4   -0.10    0.63
   5   7  -4    0.95    0.20
   5   7  -4    0.40    0.48
   5   7  -4    0.76    0.44
  -5  -7   4    0.85    0.32
  -5  -7   4    0.88    0.29
  -5  -7   4    1.04    0.36
  -5  -7   4    0.31    0.48
  -5  -7   4    0.66    0.35
   4   7  -4    0.10    0.53
   4   7  -4    0.51    0.39
   4   7  -4    0.56    0.38
   4   7  -4    1.08    0.55
   4   7  -4    1.08    0.18
  -4  -7   4    0.73    0.30
  -4  -7   4    1.00    0.63
  -4  -7   4    1.19    0.30
  -4  -7   4    0.66    0.29
  -4  -7   4    0.75    0.34
   3   7  -4   21.14    1.53
   3   7  -4   15.56    1.76
   3   7  -4   17.27    1.51
   3   7  -4   16.80    1.47
   3   7  -4   18.78    1.65
   3   7  -4   16.18    1.40
  -3  -7   4   20.38    1.38
  -3  -7   4   19.71    1.37
  -3  -7   4   18.05    1.38
  -3  -7   4   17.57    1.38
   2   7  -4   19.90    1.63
   2   7  -4   17.60    1.50
   2   7  -4   19.17    1.49
   2   7  -4   19.03    1.32
   2   7  -4   17.07    1.77
   2   7  -4   17.96    1.40
   2   7  -4   16.69    1.46
  -2  -7   4   18.68    1.35
  -2  -7   4   19.10    1.39
   1   7  -4    7.07    0.76
   1   7  -4    7.34    0.75
   1   7  -4    7.80    0.59
   1   7  -4    7.78    0.75
   1   7  -4    6.59    0.78
   1   7  -4    6.15    1.22
   1   7  -4    8.75    0.75
   1   7  -4    8.03    0.95
  -1  -7   4    7.81    0.69
   0   7  -4    1.90    0.34
   0   7  -4    2.16    0.37
   0   7  -4    1.48    0.23
   0   7  -4    2.29    0.26
   0   7  -4    2.69    0.44
   0   7  -4    2.56    0.53
   0   7  -4    2.13    0.32
   0   7  -4    1.35    0.46
   0   7  -4    1.94    0.35
   0  -7   4    1.94    0.31
  -1   7  -4   30.54    2.00
  -1   7  -4   30.14    2.23
  -1   7  -4   28.51    1.98
  -1   7  -4   25.17    2.03
  -1   7  -4   27.64    1.95
  -1   7  -4   26.99    2.05
  -1   7  -4   26.73    2.22
  -1   7  -4   27.67    2.04
  -1   7  -4   27.94    1.97
  -1   7  -4   29.29    2.06
  -1   7  -4   24.58    2.02
   1  -7   4   26.28    2.00
  -2   7  -4   48.23    3.39
  -2   7  -4   49.97    3.46
  -2   7  -4   49.85    3.53
  -2   7  -4   47.91    3.39
  -2   7  -4   47.76    3.45
  -2   7  -4   45.19    3.45
  -2   7  -4   43.92    3.38
  -2   7  -4   49.86    3.43
  -2   7  -4   47.97    3.46
  -2   7  -4   52.80    3.40
  -2   7  -4   42.02    3.69
  -2   7  -4   48.11    3.44
  -2   7  -4   49.57    3.37
   2  -7   4   50.71    3.42
  -3   7  -4    2.06    0.47
  -3   7  -4    2.81    0.65
  -3   7  -4    2.21    0.37
  -3   7  -4    2.42    0.35
  -3   7  -4    2.29    0.34
  -3   7  -4    2.49    0.32
  -3   7  -4    2.45    0.36
  -3   7  -4    2.74    0.68
  -3   7  -4    2.59    0.37
  -3   7  -4    2.28    0.31
  -3   7  -4    2.71    0.38
  -4   7  -4  101.04    6.54
  -4   7  -4   86.80    6.54
  -4   7  -4   90.97    6.80
  -4   7  -4   99.72    6.58
  -4   7  -4   99.67    6.57
  -4   7  -4   94.39    6.62
  -4   7  -4   95.16    6.58
  -4   7  -4   95.09    6.54
  -4   7  -4   82.89    6.64
  -4   7  -4  102.30    6.64
  -4   7  -4   85.85    6.55
  -5   7  -4    0.33    0.18
  -5   7  -4    0.15    0.46
  -5   7  -4    0.57    0.28
  -5   7  -4    0.42    0.22
  -5   7  -4    0.24    0.17
  -5   7  -4    1.29    0.70
  -5   7  -4    0.24    0.44
  -5   7  -4    0.32    0.25
  -5   7  -4    0.37    0.19
  -5   7  -4    0.50    0.28
  -5   7  -4    0.47    0.22
  -5   7  -4    0.42    0.23
  -6   7  -4    0.80    0.74
  -6   7  -4    0.55    0.41
  -6   7  -4    0.72    0.24
  -6   7  -4    0.62    0.31
  -6   7  -4   -0.01    0.49
  -6   7  -4    0.43    0.18
  -6   7  -4    0.29    0.28
  -6   7  -4    0.54    0.23
  -6   7  -4    0.72    0.22
  -6   7  -4    0.47    0.18
  -7   7  -4    0.48    0.51
  -7   7  -4   -0.07    0.33
  -7   7  -4    0.29    0.16
  -7   7  -4    0.86    0.30
  -7   7  -4    0.42    0.26
  -7   7  -4    0.32    0.23
  -7   7  -4    0.40    0.22
  -7   7  -4    0.19    0.25
  -7   7  -4    0.22    0.17
  -8   7  -4    1.39    0.30
  -8   7  -4    1.50    0.45
  -8   7  -4    1.65    0.30
  -8   7  -4    2.03    0.25
  -8   7  -4    1.50    0.28
  -8   7  -4    1.93    0.26
  -9   7  -4   21.47    1.55
  -9   7  -4   23.43    1.54
  -9   7  -4   20.74    1.56
  -9   7  -4   20.82    1.65
  -9   7  -4   21.25    1.57
 -10   7  -4   -0.06    0.08
 -10   7  -4    0.02    0.13
 -10   7  -4   -0.13    0.21
 -10   7  -4    0.13    0.14
   9   6  -4   31.33    2.05
   9   6  -4   25.64    2.16
   8   6  -4   23.60    1.88
   8   6  -4   21.94    2.10
   7   6  -4    7.25    1.12
   7   6  -4    8.86    1.17
   7   6  -4    7.69    0.89
  -7  -6   4    7.82    0.71
   6   6  -4   39.65    3.27
   6   6  -4   41.96    2.97
   6   6  -4   35.95    3.12
  -6  -6   4   43.79    2.94
  -6  -6   4   40.59    2.99
  -6  -6   4   42.85    2.98
  -6  -6   4   42.41    2.97
  -6  -6   4   41.79    3.16
   5   6  -4   13.10    1.29
  -5  -6   4   12.92    1.11
  -5  -6   4   15.51    1.46
  -5  -6   4   14.24    1.11
  -5  -6   4   14.27    1.12
  -5  -6   4   12.38    1.13
   4   6  -4    8.87    0.90
   4   6  -4    7.93    1.15
   4   6  -4    6.28    1.36
   4   6  -4    8.17    0.66
   4   6  -4    8.06    1.03
  -4  -6   4    7.92    0.78
  -4  -6   4    9.27    0.76
  -4  -6   4    8.50    0.75
  -4  -6   4    7.33    0.80
   3   6  -4    3.80    0.33
   3   6  -4    2.21    0.71
   3   6  -4    3.53    0.57
   3   6  -4    3.54    0.56
  -3  -6   4    3.50    0.52
  -3  -6   4    3.30    0.45
  -3  -6   4    3.09    0.52
  -3  -6   4    3.63    0.45
   2   6  -4    7.72    1.07
   2   6  -4    7.24    0.73
   2   6  -4    8.13    0.79
   2   6  -4    7.17    0.70
   2   6  -4    8.62    0.74
   2   6  -4    6.04    0.72
   2   6  -4    7.70    0.87
  -2  -6   4    7.58    0.62
  -2  -6   4    6.83    0.62
  -2  -6   4    7.40    0.67
   1   6  -4    6.05    0.62
   1   6  -4    5.05    0.63
   1   6  -4    6.76    0.98
   1   6  -4    5.39    0.59
   1   6  -4    6.09    0.59
   1   6  -4    7.04    0.63
   1   6  -4    6.12    0.77
  -1  -6   4    6.01    0.56
   0   6  -4   31.03    2.44
   0   6  -4   34.21    2.45
   0   6  -4   33.56    2.55
   0  -6   4   35.81    2.40
  -1   6  -4    5.61    0.88
  -1   6  -4    6.02    0.77
  -1   6  -4    5.17    0.55
  -1   6  -4    5.27    0.51
   1  -6   4    5.53    0.55
  -2   6  -4   18.70    1.52
  -2   6  -4   21.08    1.48
  -2   6  -4   21.48    1.50
  -3   6  -4   29.01    1.94
  -3   6  -4   28.22    1.90
  -3   6  -4   24.00    1.92
  -3   6  -4   25.32    1.91
  -3   6  -4   28.41    1.94
  -3   6  -4   26.33    1.92
  -3   6  -4   28.24    1.93
  -3   6  -4   25.08    1.96
  -4   6  -4    0.76    0.15
  -4   6  -4    1.00    0.17
  -4   6  -4    1.57    0.28
  -4   6  -4    1.59    0.42
  -4   6  -4    1.00    0.19
  -4   6  -4    1.21    0.24
  -4   6  -4    1.28    0.22
  -4   6  -4    1.40    0.22
  -4   6  -4    1.68    0.27
  -4   6  -4    1.22    0.26
  -4   6  -4    1.72    0.28
  -4   6  -4    1.62    0.50
  -5   6  -4   28.23    2.31
  -5   6  -4   30.20    2.18
  -5   6  -4   31.23    2.15
  -5   6  -4   32.92    2.42
  -5   6  -4   29.36    2.21
  -6   6  -4    9.61    1.10
  -6   6  -4   10.22    0.86
  -6   6  -4   10.67    0.85
  -6   6  -4   11.90    0.86
  -6   6  -4   10.40    0.81
  -6   6  -4    8.90    0.80
  -6   6  -4    9.02    1.07
  -6   6  -4   10.42    0.84
  -7   6  -4    1.31    0.30
  -7   6  -4    0.94    0.29
  -7   6  -4    0.80    0.24
  -7   6  -4    0.96    0.21
  -7   6  -4    0.83    0.26
  -7   6  -4    1.37    0.29
  -7   6  -4    0.83    0.48
  -7   6  -4    0.60    0.45
  -7   6  -4    0.98    0.20
  -8   6  -4   20.94    1.49
  -8   6  -4   19.24    1.64
  -8   6  -4   18.91    1.47
  -8   6  -4   20.05    1.44
  -8   6  -4   18.92    1.47
  -9   6  -4    2.83    0.49
  -9   6  -4    2.87    0.33
  -9   6  -4    2.35    0.33
  -9   6  -4    2.61    0.40
  -9   6  -4    2.53    0.31
   9  -6   4    2.12    0.36
 -10   6  -4   20.38    1.59
 -10   6  -4   22.26    1.55
 -10   6  -4   20.08    1.53
 -10   6  -4   22.30    1.53
   9   5  -4    0.75    0.37
   9   5  -4    0.10    0.66
   9   5  -4    0.87    0.22
   8   5  -4    0.64    0.55
   8   5  -4    0.94    0.26
   8   5  -4   -0.46    0.89
  -8  -5   4    0.53    0.21
   7   5  -4    8.80    1.30
  -7  -5   4    9.22    0.78
   6   5  -4   27.25    2.60
   6   5  -4   27.71    2.43
  -6  -5   4   31.83    2.16
  -6  -5   4   29.51    2.33
  -6  -5   4   28.90    2.19
  -6  -5   4   28.12    2.15
  -6  -5   4   31.15    2.13
   5   5  -4   10.44    1.56
   5   5  -4   14.38    1.20
  -5  -5   4   11.84    1.09
  -5  -5   4   13.18    1.05
  -5  -5   4   12.73    1.05
  -5  -5   4   13.10    1.05
  -5  -5   4   14.20    1.37
   4   5  -4   36.34    2.84
   4   5  -4   32.62    2.81
   4   5  -4   35.74    2.77
   4   5  -4   38.77    2.73
  -4  -5   4   36.00    2.62
  -4  -5   4   36.75    2.62
  -4  -5   4   38.50    2.60
  -4  -5   4   36.46    2.60
   3   5  -4    0.69    0.31
   3   5  -4    0.44    0.36
   3   5  -4    0.93    0.47
   3   5  -4    0.62    0.25
  -3  -5   4    0.59    0.21
  -3  -5   4    0.26    0.20
  -3  -5   4    0.40    0.25
  -3  -5   4    0.71    0.29
   2   5  -4   17.42    1.52
  -2  -5   4   17.98    1.33
  -2  -5   4   19.41    1.33
  -2  -5   4   18.24    1.34
  -1  -5   4    4.40    0.42
   0  -5   4    3.72    0.39
  -1   5  -4   13.13    1.27
  -2   5  -4   11.51    1.14
  -3   5  -4    0.51    0.37
  -4   5  -4  204.12   14.22
  -5   5  -4    0.50    0.18
  -5   5  -4    0.54    0.16
  -5   5  -4    0.33    0.14
  -5   5  -4    0.40    0.37
  -5   5  -4    0.72    0.22
  -5   5  -4    0.58    0.20
  -5   5  -4    0.14    0.17
  -5   5  -4    0.32    0.20
  -5   5  -4    0.84    0.42
  -6   5  -4   89.77    6.54
  -6   5  -4   90.03    6.55
  -6   5  -4   97.90    6.68
  -6   5  -4   94.76    6.64
  -6   5  -4   95.18    6.54
  -7   5  -4   17.14    1.41
  -7   5  -4   14.48    1.20
  -7   5  -4   15.41    1.19
  -7   5  -4   15.73    1.41
  -7   5  -4   14.20    1.16
  -7   5  -4   16.95    1.22
  -7   5  -4   16.52    1.21
   7  -5   4   16.45    1.78
  -8   5  -4   43.10    3.28
  -8   5  -4   43.28    3.31
  -8   5  -4   46.44    3.30
  -8   5  -4   51.53    3.46
  -8   5  -4   49.27    3.34
  -8   5  -4   47.32    3.32
  -9   5  -4   37.97    2.69
  -9   5  -4   41.86    2.81
  -9   5  -4   35.71    2.71
  -9   5  -4   38.41    2.66
  -9   5  -4   38.23    2.70
   9  -5   4   34.34    2.72
 -10   5  -4   24.87    1.87
 -10   5  -4   25.10    1.82
 -10   5  -4   24.40    1.80
 -10   5  -4   25.57    1.80
 -11   5  -4    3.45    0.33
 -11   5  -4    3.94    0.43
 -11   5  -4    4.02    0.36
 -11   5  -4    3.91    0.37
  11  -5   4    3.81    0.52
   9   4  -4    0.59    0.42
   9   4  -4   -1.26    0.74
  -9  -4   4    0.02    0.25
   8   4  -4   13.69    1.89
  -8  -4   4   13.16    1.15
  -8  -4   4   14.57    1.05
   7   4  -4    0.93    1.02
  -7  -4   4    2.07    0.41
  -7  -4   4    1.79    0.27
   6   4  -4   -0.19    0.86
  -6  -4   4    0.34    0.25
  -6  -4   4    0.51    0.23
  -6  -4   4    0.57    0.35
  -6  -4   4    0.48    0.24
  -6  -4   4    0.49    0.36
   5   4  -4   32.29    2.28
   5   4  -4   29.28    2.55
  -5  -4   4   29.40    2.16
  -5  -4   4   28.02    2.19
  -5  -4   4   29.74    2.16
  -5  -4   4   30.86    2.16
   4   4  -4    3.49    0.70
  -4  -4   4    2.58    0.31
  -4  -4   4    2.48    0.36
  -4  -4   4    2.27    0.34
  -4  -4   4    2.35    0.31
   3   4  -4    2.45    0.55
  -3  -4   4    2.14    0.31
  -3  -4   4    1.74    0.28
  -3  -4   4    2.04    0.25
  -1  -4   4   45.34    3.22
  -1  -4   4   46.80    3.22
  -1   4  -4   11.39    1.07
  -2   4  -4   75.39    5.39
  -3   4  -4   68.35    4.90
  -5   4  -4   50.50    3.49
   5  -4   4   45.01    3.56
  -6   4  -4   48.84    3.66
  -6   4  -4   52.32    3.64
  -6   4  -4   54.43    3.75
  -6   4  -4   54.93    3.64
   6  -4   4   46.45    3.88
  -7   4  -4   41.19    3.14
  -7   4  -4   46.46    3.28
  -7   4  -4   46.64    3.18
  -7   4  -4   45.61    3.15
  -7   4  -4   41.64    3.17
   7  -4   4   44.50    3.50
  -8   4  -4    5.43    0.56
  -8   4  -4    5.46    0.82
  -8   4  -4    5.58    0.57
  -8   4  -4    5.02    0.82
  -8   4  -4    5.55    0.48
  -8   4  -4    4.87    0.52
  -8   4  -4    4.87    0.59
   8  -4   4    6.25    0.68
   8  -4   4    4.72    0.96
  -9   4  -4   42.21    3.35
  -9   4  -4   44.19    3.31
  -9   4  -4   51.21    3.36
  -9   4  -4   45.08    3.38
  -9   4  -4   52.26    3.46
   9  -4   4   47.14    3.38
   9  -4   4   43.12    3.39
   9  -4   4   54.07    3.41
 -10   4  -4    0.23    0.24
 -10   4  -4   -0.01    0.24
 -10   4  -4    0.00    0.36
 -10   4  -4    0.26    0.19
 -10   4  -4   -0.02    0.17
  10  -4   4   -0.12    0.38
 -11   4  -4    1.43    0.24
 -11   4  -4    1.53    0.22
 -11   4  -4    1.49    0.29
 -11   4  -4    1.73    0.26
  11  -4   4    1.39    0.36
  -9  -3   4   27.60    2.01
   8   3  -4    6.77    1.19
  -8  -3   4    6.01    0.69
   7   3  -4   30.28    2.74
  -7  -3   4   29.48    2.02
  -7  -3   4   27.60    2.09
  -7  -3   4   26.65    2.09
   6   3  -4   10.01    1.66
  -6  -3   4    8.47    0.77
  -6  -3   4    7.95    0.80
  -6  -3   4    8.83    0.91
  -6  -3   4    9.92    0.86
  -6  -3   4    9.77    0.76
  -6  -3   4    9.65    0.77
   5   3  -4   25.97    2.41
  -5  -3   4   28.44    1.97
  -5  -3   4   28.48    1.97
  -5  -3   4   26.87    2.00
  -5  -3   4   26.44    1.97
   4   3  -4   11.55    1.46
  -4  -3   4   12.81    0.96
  -4  -3   4   11.79    0.99
  -4  -3   4   13.57    1.00
  -4  -3   4   13.18    0.97
  -3  -3   4    1.55    0.21
  -3  -3   4    1.26    0.20
  -3  -3   4    1.38    0.23
  -2  -3   4   26.50    1.98
  -2  -3   4   28.73    1.97
  -2  -3   4   28.82    1.97
  -1  -3   4   11.91    0.87
  -1  -3   4   11.75    0.88
  -1  -3   4   12.80    0.88
   0   3  -4    1.59    0.37
   0  -3   4    1.25    0.16
   0  -3   4    1.41    0.18
  -2   3  -4   42.06    3.05
  -4   3  -4    5.79    0.62
  -5   3  -4  302.90   21.06
  -6   3  -4    0.09    0.16
  -6   3  -4    0.16    0.37
  -6   3  -4    0.11    0.18
  -6   3  -4    0.65    0.33
  -6   3  -4    0.50    0.35
  -6   3  -4    0.03    0.12
  -6   3  -4    0.01    0.13
   6  -3   4   -0.23    0.52
  -7   3  -4    4.09    0.48
  -7   3  -4    4.80    0.69
  -7   3  -4    3.91    0.44
  -7   3  -4    3.33    0.63
  -7   3  -4    3.39    0.42
  -7   3  -4    4.48    0.64
   7  -3   4    2.66    0.76
  -8   3  -4    2.00    0.54
  -8   3  -4    1.42    0.31
  -8   3  -4    1.91    0.49
  -8   3  -4    1.48    0.27
  -8   3  -4    1.59    0.29
  -8   3  -4    1.13    0.30
  -8   3  -4    1.78    0.31
  -8   3  -4    1.67    0.63
   8  -3   4    2.80    0.43
   8  -3   4    2.54    0.44
   8  -3   4    1.79    0.78
  -9   3  -4   14.63    1.07
  -9   3  -4   14.06    1.45
  -9   3  -4   13.11    1.02
  -9   3  -4   13.83    1.18
  -9   3  -4   11.92    1.07
  -9   3  -4   11.25    1.03
  -9   3  -4   14.20    1.05
  -9   3  -4   12.61    1.28
   9  -3   4   13.07    1.14
   9  -3   4   12.92    1.89
   9  -3   4   14.16    1.19
   9  -3   4   12.96    1.17
 -10   3  -4    4.72    0.50
 -10   3  -4    3.86    0.53
 -10   3  -4    4.71    0.63
 -10   3  -4    3.87    0.46
 -10   3  -4    4.95    0.46
  10  -3   4    3.48    0.57
 -11   3  -4    2.12    0.31
 -11   3  -4    2.34    0.32
 -11   3  -4    2.38    0.33
  11  -3   4    1.96    0.45
 -12   3  -4    0.16    0.12
 -12   3  -4    0.21    0.13
  12  -3   4    0.31    0.28
  10   2  -4    0.13    0.40
 -10  -2   4    0.21    0.16
 -10  -2   4    0.32    0.15
  -9  -2   4   15.38    1.19
   8   2  -4   -0.44    0.94
   7   2  -4   37.54    3.42
  -7  -2   4   39.51    2.74
  -7  -2   4   39.01    2.81
  -7  -2   4   39.06    2.81
   6   2  -4    2.58    0.97
  -6  -2   4    2.12    0.37
  -6  -2   4    1.94    0.30
  -6  -2   4    2.00    0.26
  -6  -2   4    1.81    0.28
   5   2  -4    1.30    0.46
   5   2  -4    1.35    0.38
   5   2  -4    2.25    0.87
  -5  -2   4    1.44    0.30
  -5  -2   4    1.49    0.23
  -5  -2   4    1.53    0.23
  -5  -2   4    1.52    0.24
  -4  -2   4   16.31    1.22
  -4  -2   4   15.57    1.23
  -4  -2   4   18.48    1.25
  -4  -2   4   16.49    1.22
  -3  -2   4   22.12    1.51
  -3  -2   4   21.86    1.51
  -3  -2   4   19.52    1.51
  -2  -2   4    4.74    0.36
  -2  -2   4    4.14    0.37
  -2  -2   4    4.22    0.36
   1   2  -4   38.22    2.72
  -3   2  -4   29.88    2.12
  -3   2  -4   28.55    2.08
  -4   2  -4  101.09    7.07
   4  -2   4  102.27    7.16
  -5   2  -4   24.36    1.90
  -5   2  -4   29.36    1.99
  -5   2  -4   26.88    2.05
   5  -2   4   27.65    1.92
   5  -2   4   26.19    2.08
  -6   2  -4  105.68    7.19
   6  -2   4   96.32    7.18
  -7   2  -4   12.61    0.90
  -7   2  -4   11.63    1.05
  -7   2  -4   10.52    0.92
  -7   2  -4   10.83    0.88
  -7   2  -4   10.21    1.29
   7  -2   4    8.92    1.29
   7  -2   4   12.81    0.93
  -8   2  -4    7.21    1.32
  -8   2  -4    9.93    0.80
  -8   2  -4    9.97    0.89
  -8   2  -4    8.48    0.98
  -8   2  -4    8.26    0.76
   8  -2   4    7.23    1.41
   8  -2   4    9.36    0.86
   8  -2   4   10.12    0.85
   8  -2   4   10.36    0.92
  -9   2  -4   27.55    1.84
  -9   2  -4   24.94    1.86
  -9   2  -4   25.67    2.02
  -9   2  -4   27.70    2.33
   9  -2   4   22.88    1.89
   9  -2   4   25.62    1.94
   9  -2   4   22.34    1.91
   9  -2   4   24.67    2.50
 -10   2  -4   16.67    1.32
 -10   2  -4   19.73    1.38
 -10   2  -4   19.89    1.34
 -10   2  -4   17.02    1.74
 -10   2  -4   16.02    1.33
 -10   2  -4   15.94    1.35
 -10   2  -4   17.91    1.31
 -10   2  -4   19.02    1.80
  10  -2   4   15.36    1.48
  10  -2   4   17.23    1.84
  10  -2   4   17.11    2.44
 -11   2  -4    0.34    0.20
 -11   2  -4    0.02    0.19
 -11   2  -4   -0.10    0.20
 -11   2  -4    0.17    0.21
  11  -2   4    0.20    0.45
 -12   2  -4    2.18    0.30
 -12   2  -4    2.41    0.28
  12  -2   4    1.85    0.39
  10   1  -4    0.25    0.48
 -10  -1   4    0.43    0.16
   9   1  -4   -0.11    0.75
  -9  -1   4    0.24    0.23
  -9  -1   4   -0.06    0.24
   8   1  -4    2.70    0.51
   8   1  -4    2.58    0.99
  -8  -1   4    2.79    0.31
  -8  -1   4    2.36    0.36
   7   1  -4    6.14    1.19
  -7  -1   4    5.14    0.60
  -7  -1   4    5.23    0.64
   6   1  -4   10.99    1.66
   6   1  -4   10.16    1.08
  -6  -1   4    7.74    0.73
  -6  -1   4    9.60    1.27
  -6  -1   4    7.63    0.77
  -6  -1   4    7.75    0.69
  -6  -1   4    8.70    0.68
   5   1  -4    1.64    0.37
   5   1  -4    1.28    0.41
   5   1  -4    1.29    0.56
  -5  -1   4    1.38    0.22
  -5  -1   4    1.38    0.22
  -5  -1   4    1.18    0.61
  -5  -1   4    1.44    0.22
  -5  -1   4    1.46    0.29
  -4  -1   4    9.63    0.75
  -4  -1   4    9.27    1.11
  -4  -1   4    9.21    0.72
  -4  -1   4    9.79    0.73
   3   1  -4   17.85    1.59
  -3  -1   4   21.41    1.68
  -3  -1   4   19.84    1.47
  -3  -1   4   22.46    1.47
  -3  -1   4   21.47    1.47
  -2  -1   4   91.49    6.47
  -1  -1   4  165.04   11.52
   0   1  -4    4.28    0.30
   0   1  -4    3.68    0.37
   0  -1   4    3.79    0.29
   0  -1   4    3.53    0.30
   0  -1   4    3.55    0.29
  -1   1  -4    0.35    0.16
  -1   1  -4    0.18    0.10
  -1   1  -4    0.23    0.18
   1  -1   4    0.21    0.07
   1  -1   4    0.32    0.08
   2  -1   4    6.96    0.49
   2  -1   4    6.51    0.50
  -3   1  -4   66.69    4.73
  -4   1  -4  225.14   15.71
  -5   1  -4  203.86   14.29
  -6   1  -4  619.05   43.04
  -7   1  -4   55.65    4.00
  -7   1  -4   49.14    3.93
  -7   1  -4   58.92    3.93
   7  -1   4   58.98    3.92
  -8   1  -4    0.12    0.26
  -8   1  -4    0.79    0.49
  -8   1  -4    0.43    0.70
  -8   1  -4    0.31    0.27
  -8   1  -4    0.51    0.25
   8  -1   4    0.53    0.67
   8  -1   4    0.82    0.28
   8  -1   4    1.13    0.36
   8  -1   4    0.66    0.33
  -9   1  -4   81.14    5.11
  -9   1  -4   68.56    5.14
  -9   1  -4   75.61    5.25
  -9   1  -4   66.66    5.12
  -9   1  -4   78.89    5.51
  -9   1  -4   71.57    5.13
   9  -1   4   74.37    5.16
   9  -1   4   68.49    5.54
   9  -1   4   70.40    5.13
 -10   1  -4    4.74    0.62
 -10   1  -4    6.43    1.04
 -10   1  -4    5.16    0.52
 -10   1  -4    4.51    0.60
 -10   1  -4    5.61    0.88
 -10   1  -4    5.76    0.57
 -10   1  -4    6.18    0.58
  10  -1   4    4.92    1.12
  10  -1   4    5.16    0.66
  10  -1   4    3.88    0.59
  10  -1   4    5.86    0.87
 -11   1  -4    8.35    0.71
 -11   1  -4    7.81    0.66
 -11   1  -4    7.16    0.71
 -11   1  -4    8.83    0.73
  11  -1   4    9.67    1.00
 -12   1  -4    0.18    0.16
 -12   1  -4   -0.03    0.15
 -12   1  -4    0.07    0.17
  12  -1   4    0.47    0.36
 -10   0   4    0.84    0.17
  -9   0   4    3.70    0.32
  -9   0   4    2.67    0.43
   7   0  -4    1.79    0.68
  -7   0   4    2.50    0.44
  -7   0   4    1.74    0.39
  -7   0   4    2.07    0.36
  -7   0   4    1.58    0.20
  -7   0   4    1.57    0.79
   6   0  -4    1.66    0.44
   6   0  -4    1.58    0.49
   6   0  -4    1.69    0.66
  -6   0   4    1.22    0.32
  -6   0   4    1.46    0.27
  -6   0   4    1.91    0.79
  -6   0   4    1.82    0.39
   5   0  -4    3.33    0.52
   5   0  -4    3.82    0.66
   5   0  -4    4.02    0.66
  -5   0   4    2.67    0.35
  -5   0   4    3.37    0.69
  -5   0   4    2.65    0.32
  -5   0   4    2.68    0.35
  -5   0   4    2.94    0.35
  -4   0   4   27.13    2.03
  -4   0   4   24.63    1.76
  -4   0   4   24.17    1.74
  -4   0   4   22.74    1.73
   3   0  -4    1.53    0.30
  -3   0   4    1.03    0.14
  -3   0   4    1.16    0.40
  -3   0   4    0.93    0.14
  -3   0   4    0.83    0.17
  -2   0   4  191.49   13.36
  -1   0   4  268.39   18.68
   0   0   4    7.32    0.56
   0   0   4    8.31    0.56
  -1   0  -4    6.05    0.52
  -1   0  -4    7.67    0.50
  -1   0  -4    7.02    0.50
   1   0   4    6.44    0.49
   1   0   4    6.82    0.50
  -2   0  -4   15.31    1.19
  -2   0  -4   18.91    1.25
  -2   0  -4   16.72    1.20
   2   0   4   16.70    1.20
   2   0   4   16.42    1.20
   2   0   4   18.73    1.26
  -3   0  -4  256.11   17.83
  -4   0  -4  325.43   22.66
  -5   0  -4  362.41   25.28
  -6   0  -4  640.28   44.54
  -7   0  -4   91.76    6.64
  -7   0  -4   84.61    6.87
  -7   0  -4   96.67    6.70
   7   0   4  100.41    6.71
   7   0   4   98.08    6.63
   7   0   4   98.02    6.64
  -8   0  -4  100.71    7.71
  -8   0  -4  125.46    7.71
  -8   0  -4  106.50    7.77
  -8   0  -4  113.12    7.67
  -8   0  -4  113.87    8.02
   8   0   4  117.85    7.69
   8   0   4  103.98    7.93
   8   0   4  100.14    7.69
  -9   0  -4   21.02    1.55
  -9   0  -4   22.37    1.78
  -9   0  -4   22.60    2.27
  -9   0  -4   22.41    1.64
  -9   0  -4   19.02    1.61
   9   0   4   20.96    1.65
   9   0   4   22.38    1.66
   9   0   4   22.78    2.26
   9   0   4   20.63    1.62
 -10   0  -4   40.24    2.76
 -10   0  -4   41.71    2.73
 -10   0  -4   37.99    3.21
 -10   0  -4   40.70    2.75
 -10   0  -4   35.52    2.74
  10   0   4   34.42    2.78
  10   0   4   34.29    2.76
  10   0   4   38.33    2.79
 -11   0  -4   14.58    1.11
 -11   0  -4   14.12    1.10
 -11   0  -4   13.01    1.12
  11   0   4   14.71    1.27
 -12   0  -4    0.80    0.20
 -12   0  -4    0.82    0.22
  12   0   4    1.18    0.37
   9  -1  -4   29.67    2.23
  -9   1   4   31.00    2.14
  -8   1   4    3.99    0.39
  -8   1   4    3.47    0.48
  -8   1   4    4.05    0.32
   7  -1  -4   11.69    1.31
   7  -1  -4   11.05    1.32
  -7   1   4   14.32    1.05
  -7   1   4   12.43    1.44
  -7   1   4   13.80    1.02
  -7   1   4   12.41    0.93
   6  -1  -4    2.56    0.51
   6  -1  -4    2.84    0.55
   6  -1  -4    1.72    0.68
  -6   1   4    2.58    0.38
  -6   1   4    2.76    0.46
  -6   1   4    2.94    0.47
  -6   1   4    2.28    0.38
  -6   1   4    2.28    0.72
   5  -1  -4    0.99    0.44
   5  -1  -4    0.45    0.53
   5  -1  -4    1.08    0.40
  -5   1   4    1.22    0.31
  -5   1   4    0.71    0.51
  -5   1   4    0.59    0.18
  -5   1   4    0.60    0.25
  -4   1   4   51.55    3.68
  -4   1   4   45.88    3.48
  -4   1   4   52.44    3.50
  -3   1   4    2.19    0.44
  -3   1   4    2.95    0.30
  -3   1   4    2.38    0.24
  -3   1   4    2.23    0.23
  -2   1   4   78.05    6.01
  -2   1   4   95.79    6.14
  -1   1   4  327.52   22.75
   0  -1  -4    1.34    0.18
   0  -1  -4    0.91    0.14
   0  -1  -4    1.09    0.16
   0   1   4    0.79    0.12
   0   1   4    0.82    0.11
   0   1   4    0.81    0.11
   1   1   4  180.60   12.59
  -2  -1  -4  362.82   25.22
  -3  -1  -4   31.72    2.46
   3   1   4   33.36    2.33
   3   1   4   34.99    2.41
  -4  -1  -4  142.55   10.07
  -5  -1  -4    5.06    0.40
  -5  -1  -4    4.94    0.41
  -5  -1  -4    5.57    0.54
  -5  -1  -4    4.07    0.74
   5   1   4    4.93    0.44
   5   1   4    4.67    0.67
   5   1   4    5.06    0.43
  -6  -1  -4    2.08    0.24
  -6  -1  -4    1.22    0.51
  -6  -1  -4    1.94    0.26
   6   1   4    2.47    0.27
   6   1   4    1.73    0.51
   6   1   4    2.10    0.27
  -7  -1  -4    3.58    0.61
  -7  -1  -4    1.95    0.68
  -7  -1  -4    2.03    0.30
  -7  -1  -4    2.53    0.40
   7   1   4    3.30    0.40
   7   1   4    1.72    0.60
   7   1   4    2.92    0.36
  -8  -1  -4    1.85    0.35
  -8  -1  -4    3.21    0.39
  -8  -1  -4    2.77    0.91
  -8  -1  -4    2.97    0.57
  -8  -1  -4    2.16    0.36
   8   1   4    2.12    0.71
   8   1   4    2.61    0.34
  -9  -1  -4    0.43    0.53
  -9  -1  -4    0.06    0.25
  -9  -1  -4   -0.41    0.78
  -9  -1  -4   -0.50    0.32
   9   1   4    0.13    0.29
   9   1   4   -0.14    0.74
   9   1   4    0.24    0.31
   9   1   4    0.61    0.32
 -10  -1  -4   45.66    3.21
 -10  -1  -4   47.00    3.69
 -10  -1  -4   44.45    3.19
  10   1   4   41.21    3.20
  10   1   4   44.66    3.21
 -11  -1  -4   12.32    1.02
 -11  -1  -4   14.18    1.02
 -11  -1  -4   11.58    1.07
 -11  -1  -4   13.16    1.04
  11   1   4   13.48    1.16
 -12  -1  -4    0.31    0.16
 -12  -1  -4    0.00    0.23
 -12  -1  -4    0.66    0.22
  12   1   4    0.94    0.34
   9  -2  -4    0.12    0.36
  -9   2   4    0.70    0.19
  -8   2   4   21.27    1.66
  -8   2   4   24.25    1.61
  -8   2   4   23.08    1.64
   7  -2  -4    2.44    0.55
   7  -2  -4    3.22    0.77
   7  -2  -4    3.49    0.55
   7  -2  -4    4.78    1.02
  -7   2   4    3.83    0.77
  -7   2   4    3.70    0.49
  -7   2   4    3.10    0.31
  -7   2   4    4.19    0.46
  -7   2   4    3.90    0.52
   6  -2  -4   18.76    1.60
   6  -2  -4   16.23    1.71
   6  -2  -4   20.59    1.64
  -6   2   4   20.34    1.87
  -6   2   4   21.52    1.51
  -6   2   4   19.01    1.45
  -6   2   4   20.65    1.48
   5  -2  -4    0.63    0.39
   5  -2  -4    0.23    0.49
   5  -2  -4    0.08    0.40
  -5   2   4    0.32    0.50
  -5   2   4    0.52    0.18
  -5   2   4    0.64    0.23
  -5   2   4    0.46    0.25
  -5   2   4    0.52    0.26
   4  -2  -4   11.86    0.92
  -4   2   4   10.59    0.84
  -4   2   4   10.63    1.14
  -4   2   4   10.83    0.85
   3  -2  -4    0.43    0.28
   3  -2  -4    0.88    0.21
  -3   2   4    0.60    0.36
  -3   2   4    0.57    0.17
  -2   2   4  382.21   26.54
   1  -2  -4    1.30    0.20
   1  -2  -4    1.64    0.28
  -1   2   4    1.15    0.16
  -1   2   4    1.23    0.14
  -1   2   4    1.54    0.32
  -1   2   4    0.98    0.14
   0   2   4  280.49   19.49
   1   2   4   99.99    7.02
  -2  -2  -4   55.90    4.03
  -3  -2  -4    7.82    0.60
  -3  -2  -4    8.49    0.63
  -3  -2  -4    7.61    0.63
  -3  -2  -4    7.98    0.60
  -3  -2  -4    8.87    0.83
   3   2   4    8.06    0.60
   3   2   4    9.16    0.71
   3   2   4    7.87    0.59
  -4  -2  -4  224.61   15.78
  -5  -2  -4   26.96    1.81
  -5  -2  -4   24.48    1.74
  -5  -2  -4   23.69    1.73
   5   2   4   24.54    1.75
   5   2   4   24.61    1.88
   5   2   4   22.82    1.74
  -6  -2  -4    6.72    0.63
  -6  -2  -4    5.68    0.48
  -6  -2  -4    5.19    0.46
  -6  -2  -4    5.97    0.64
   6   2   4    5.44    0.49
   6   2   4    3.99    0.76
   6   2   4    4.99    0.47
  -7  -2  -4    1.41    0.22
  -7  -2  -4    1.55    0.25
  -7  -2  -4    2.30    0.47
  -7  -2  -4    0.91    0.63
  -7  -2  -4    1.59    0.35
   7   2   4    1.84    0.26
   7   2   4    1.68    0.25
   7   2   4    1.21    0.51
   7   2   4    1.19    0.22
  -8  -2  -4    1.19    0.28
  -8  -2  -4    1.46    0.30
  -8  -2  -4    2.33    0.54
  -8  -2  -4    1.25    0.76
  -8  -2  -4    1.56    0.32
  -8  -2  -4    1.60    0.37
   8   2   4    1.62    0.28
   8   2   4    1.71    0.59
   8   2   4    2.28    0.31
   8   2   4    1.69    0.63
  -9  -2  -4   12.23    1.06
  -9  -2  -4   12.25    1.20
  -9  -2  -4   10.49    0.97
  -9  -2  -4   14.75    1.98
   9   2   4   12.57    0.99
 -10  -2  -4    0.41    0.37
 -10  -2  -4    0.41    0.87
 -10  -2  -4    0.75    0.57
 -10  -2  -4    1.11    0.28
  10   2   4    0.76    0.30
  10   2   4    1.47    0.82
  10   2   4    0.54    0.69
 -11  -2  -4    0.62    0.21
 -11  -2  -4    0.18    0.25
 -11  -2  -4    0.25    0.32
  11   2   4    0.98    0.64
  11   2   4    1.29    0.36
 -12  -2  -4   11.67    0.92
  12   2   4   12.07    1.18
  -9   3   4    0.25    0.12
  -9   3   4    0.31    0.14
  -8   3   4    1.95    0.33
  -8   3   4    1.88    0.28
  -8   3   4    2.12    0.34
  -8   3   4    2.47    0.23
   7  -3  -4    1.78    1.18
   7  -3  -4    1.46    0.61
   7  -3  -4    0.65    0.62
   7  -3  -4    1.14    0.45
  -7   3   4    1.35    0.34
  -7   3   4    1.28    0.24
  -7   3   4    0.97    0.62
  -7   3   4    1.18    0.20
  -7   3   4    1.67    0.23
   6  -3  -4    4.70    0.64
   6  -3  -4    6.56    1.32
   6  -3  -4    5.38    0.67
   6  -3  -4    4.23    0.78
  -6   3   4    5.19    0.82
  -6   3   4    5.36    0.59
  -6   3   4    4.28    0.41
  -6   3   4    5.63    0.55
  -6   3   4    5.56    0.50
   5  -3  -4    2.20    0.51
   5  -3  -4    2.71    0.50
   5  -3  -4    3.44    0.51
  -5   3   4    2.35    0.26
  -5   3   4    3.39    0.42
  -5   3   4    3.23    0.34
  -5   3   4    3.03    0.63
  -5   3   4    2.09    0.31
  -5   3   4    3.38    0.42
   4  -3  -4    0.45    0.32
   4  -3  -4    0.39    0.31
   4  -3  -4    0.53    0.28
  -4   3   4    0.59    0.17
  -4   3   4    0.99    0.23
  -4   3   4    0.52    0.20
  -4   3   4    0.48    0.10
  -4   3   4    0.34    0.43
   3  -3  -4   21.25    1.55
   3  -3  -4   20.87    1.52
  -3   3   4   20.83    1.50
  -3   3   4   21.16    1.67
  -2   3   4   68.83    4.86
  -2   3   4   71.24    4.97
   1  -3  -4    7.63    0.58
   1  -3  -4    7.19    0.57
  -1   3   4    7.64    0.74
   0   3   4  124.06    8.69
  -1  -3  -4   13.48    1.04
  -1  -3  -4   14.98    1.09
   1   3   4   15.80    1.18
  -2  -3  -4   18.35    1.36
   2   3   4   19.42    1.33
  -3  -3  -4   27.39    1.94
  -3  -3  -4   30.72    2.18
  -3  -3  -4   25.34    1.96
   3   3   4   27.66    1.94
  -4  -3  -4    2.04    0.25
  -4  -3  -4    2.03    0.47
  -4  -3  -4    2.27    0.34
  -4  -3  -4    2.23    0.25
  -4  -3  -4    1.81    0.33
   4   3   4    1.52    0.21
   4   3   4    1.78    0.32
   4   3   4    1.90    0.22
  -5  -3  -4   21.63    1.54
  -5  -3  -4   20.94    1.57
  -5  -3  -4   20.95    1.47
  -5  -3  -4   20.56    1.46
   5   3   4   18.64    1.45
   5   3   4   19.80    1.46
   5   3   4   20.48    1.60
  -6  -3  -4    6.26    0.70
  -6  -3  -4    6.38    0.52
  -6  -3  -4    4.39    0.81
  -6  -3  -4    6.84    0.53
   6   3   4    5.17    0.78
   6   3   4    5.71    0.51
   6   3   4    5.64    0.49
  -7  -3  -4    2.08    0.28
  -7  -3  -4    1.67    0.27
  -7  -3  -4    1.37    0.38
  -7  -3  -4    2.31    0.71
  -7  -3  -4    2.05    0.30
  -7  -3  -4    1.83    0.37
  -7  -3  -4    2.38    0.51
   7   3   4    1.72    0.53
   7   3   4    2.22    0.31
   7   3   4    1.84    0.27
   7   3   4    2.92    0.51
  -8  -3  -4   24.80    2.06
  -8  -3  -4   24.53    1.94
  -8  -3  -4   28.31    2.11
   8   3   4   27.48    1.95
   8   3   4   28.97    1.95
  -9  -3  -4    1.27    0.58
  -9  -3  -4    2.07    0.39
  -9  -3  -4    2.12    0.42
   9   3   4    1.87    0.31
   9   3   4    2.32    0.78
   9   3   4    3.08    0.69
 -10  -3  -4   31.68    2.34
 -11  -3  -4    0.19    0.30
 -12  -3  -4    0.28    0.24
  12   3   4    0.41    0.37
  -9   4   4    1.85    0.22
  -9   4   4    2.00    0.24
  -8   4   4    4.32    0.34
  -8   4   4    3.90    0.50
  -8   4   4    3.87    0.39
   7  -4  -4    0.20    0.42
  -7   4   4    0.95    0.19
  -7   4   4    0.54    0.14
  -7   4   4    0.81    0.13
  -7   4   4    0.85    0.20
  -7   4   4    0.70    0.31
   6  -4  -4   17.70    1.50
   6  -4  -4   19.40    1.57
  -6   4   4   20.14    1.66
  -6   4   4   16.98    1.31
   5  -4  -4    1.31    0.45
   5  -4  -4    1.72    0.44
   5  -4  -4    1.29    0.40
  -5   4   4    1.86    0.56
  -5   4   4    1.80    0.30
  -5   4   4    2.03    0.32
  -5   4   4    2.05    0.30
  -5   4   4    1.44    0.22
   4  -4  -4    0.70    0.32
   4  -4  -4    0.71    0.27
   4  -4  -4    0.23    0.32
  -4   4   4    0.71    0.13
  -4   4   4    0.83    0.17
  -4   4   4    0.82    0.44
  -4   4   4    0.67    0.11
  -4   4   4    0.89    0.21
   3  -4  -4   14.76    1.13
  -3   4   4   13.24    1.06
  -3   4   4   14.68    1.07
  -3   4   4   16.60    1.28
   2  -4  -4   43.56    3.09
  -2   4   4   44.62    3.18
  -1   4   4  269.18   18.72
   0  -4  -4    7.18    0.66
   0  -4  -4    8.51    0.66
   0   4   4    9.38    0.81
  -1  -4  -4   76.66    5.54
   1   4   4   81.34    5.59
  -2  -4  -4   87.93    6.17
  -3  -4  -4    0.53    0.25
  -3  -4  -4    0.67    0.22
  -3  -4  -4    0.89    0.14
  -3  -4  -4    0.72    0.14
   3   4   4    0.52    0.25
  -4  -4  -4  161.86   11.66
  -5  -4  -4    6.64    0.63
  -5  -4  -4    4.85    0.66
  -5  -4  -4    4.97    0.70
  -5  -4  -4    6.35    0.52
  -5  -4  -4    6.39    0.52
   5   4   4    5.56    0.74
   5   4   4    4.72    0.47
  -6  -4  -4  190.36   13.34
  -6  -4  -4  194.18   13.40
  -7  -4  -4   10.84    0.94
  -7  -4  -4   10.30    1.10
  -7  -4  -4   11.90    0.95
  -7  -4  -4   13.37    1.13
   7   4   4   12.42    0.92
   7   4   4   11.25    1.17
   7   4   4   12.21    0.91
   7   4   4   12.11    1.31
  -8  -4  -4    7.85    0.72
  -8  -4  -4    6.31    0.84
  -8  -4  -4    6.50    0.67
  -8  -4  -4    7.61    0.94
  -8  -4  -4    6.00    0.69
   8   4   4    9.46    1.27
   9   4   4   21.88    2.17
 -10  -4  -4   37.02    2.69
 -12  -4  -4   10.81    0.87
  12   4   4   12.14    1.11
  -8   5   4    9.29    0.79
  -8   5   4    9.49    0.70
  -8   5   4   10.07    0.73
   7  -5  -4    7.76    0.86
  -7   5   4    6.49    0.66
  -7   5   4    6.91    0.53
  -7   5   4    5.40    0.52
  -7   5   4    5.79    0.49
  -7   5   4    6.97    0.53
   6  -5  -4    3.99    0.57
   6  -5  -4    2.75    0.62
   6  -5  -4    3.82    0.56
   6  -5  -4    2.95    1.13
  -6   5   4    3.86    0.59
  -6   5   4    3.51    0.38
  -6   5   4    4.02    0.39
  -6   5   4    3.31    0.33
  -6   5   4    3.61    0.53
   5  -5  -4    0.27    0.38
   5  -5  -4    0.31    0.35
   5  -5  -4   -0.33    0.38
  -5   5   4    0.71    0.17
  -5   5   4    0.47    0.12
  -5   5   4    0.43    0.14
  -5   5   4    0.34    0.26
  -5   5   4    0.68    0.50
   4  -5  -4    0.09    0.31
   4  -5  -4   -0.03    0.26
   4  -5  -4    0.26    0.32
  -4   5   4    0.61    0.45
  -4   5   4    0.30    0.10
  -4   5   4    0.40    0.16
  -4   5   4    0.31    0.24
   3  -5  -4    3.84    0.42
   3  -5  -4    3.63    0.51
  -3   5   4    4.68    0.72
  -3   5   4    4.31    0.40
  -3   5   4    3.67    0.46
  -3   5   4    3.88    0.39
  -2   5   4   79.74    5.85
  -2   5   4   81.15    5.87
  -2   5   4   92.69    5.96
   1  -5  -4   34.44    2.52
   1  -5  -4   37.83    2.53
  -1   5   4   35.40    2.61
   0  -5  -4   87.35    6.50
   0   5   4   98.66    6.55
  -1  -5  -4   27.92    1.85
  -1  -5  -4   23.29    1.91
  -1  -5  -4   24.19    1.90
   1   5   4   29.34    1.98
  -2  -5  -4  119.20    8.17
   2   5   4  113.89    8.18
  -5  -5  -4  126.46    8.86
  -5  -5  -4  125.54    8.94
  -5  -5  -4  128.23    8.82
   5   5   4  134.03    8.91
   5   5   4  119.46    8.95
  -6  -5  -4    1.60    0.43
  -6  -5  -4    2.10    0.32
  -6  -5  -4    1.57    0.45
  -6  -5  -4    2.05    0.33
  -6  -5  -4    2.48    0.33
   6   5   4    1.18    0.49
  -7  -5  -4   16.94    1.56
  -7  -5  -4   19.53    1.42
  -7  -5  -4   18.23    1.54
  -7  -5  -4   17.05    1.39
  -7  -5  -4   18.10    1.40
   7   5   4   17.65    1.57
   7   5   4   21.55    1.78
  -8  -5  -4    1.23    0.39
  -8  -5  -4    2.05    0.58
  -8  -5  -4    1.59    0.47
  -8  -5  -4    1.31    0.31
  -8  -5  -4    1.05    0.32
  -9  -5  -4   17.00    1.59
  -9  -5  -4   18.95    1.43
  -9  -5  -4   20.14    1.59
 -12  -5  -4   29.27    2.14
  12   5   4   31.28    2.25
  -8   6   4    1.90    0.24
  -8   6   4    2.46    0.34
  -8   6   4    2.58    0.21
   7  -6  -4    3.04    0.44
  -7   6   4    2.52    0.27
  -7   6   4    3.42    0.33
  -7   6   4    2.21    0.31
  -7   6   4    2.69    0.45
  -7   6   4    3.19    0.32
   6  -6  -4    7.84    0.93
  -6   6   4    7.63    0.61
  -6   6   4    7.03    0.64
  -6   6   4    7.89    0.76
  -6   6   4    8.92    0.66
  -6   6   4    9.09    0.65
   5  -6  -4    0.19    0.39
   5  -6  -4    0.95    0.40
   5  -6  -4    0.58    0.34
  -5   6   4    1.31    0.23
  -5   6   4    0.96    0.21
  -5   6   4    1.22    0.21
  -5   6   4    1.04    0.31
   4  -6  -4    9.68    0.92
  -4   6   4   11.82    0.81
  -4   6   4   12.33    1.05
  -4   6   4   10.52    0.82
  -4   6   4    9.24    0.78
   3  -6  -4   22.71    1.85
   3  -6  -4   26.13    1.82
  -3   6   4   25.65    1.79
  -3   6   4   23.23    1.78
  -3   6   4   27.98    1.78
  -2   6   4   84.17    5.54
  -2   6   4   82.63    5.63
  -2   6   4   74.22    5.53
  -2   6   4   78.00    5.54
  -1   6   4  194.25   12.78
  -1   6   4  174.77   12.77
   0  -6  -4   57.06    4.26
   0  -6  -4   56.88    4.27
   0   6   4   67.00    4.22
  -1  -6  -4   31.08    2.16
  -1  -6  -4   28.08    2.22
   1   6   4   32.34    2.27
  -2  -6  -4   -0.28    0.21
  -2  -6  -4   -0.03    0.28
  -2  -6  -4    0.21    0.16
   2   6   4   -0.14    0.30
  -3  -6  -4  159.96   11.99
   3   6   4  181.98   11.91
  -4  -6  -4   15.38    1.08
  -4  -6  -4   12.73    1.25
  -4  -6  -4   13.54    1.08
  -4  -6  -4   14.92    1.28
   4   6   4   13.35    1.37
   4   6   4   14.50    1.14
  -5  -6  -4   96.87    6.51
  -5  -6  -4   92.95    6.66
  -5  -6  -4   90.83    6.57
  -5  -6  -4   86.44    6.51
  -5  -6  -4   96.25    6.52
   5   6   4   99.95    6.58
   5   6   4   89.18    6.70
  -6  -6  -4   10.73    1.16
  -6  -6  -4   11.54    0.96
  -6  -6  -4   11.36    0.97
  -6  -6  -4   12.03    0.98
  -6  -6  -4   10.97    1.15
   6   6   4   12.77    1.12
   6   6   4   10.24    1.33
  -7  -6  -4    1.80    0.40
  -7  -6  -4    1.14    0.51
  -7  -6  -4    1.73    0.32
  -7  -6  -4    1.46    0.46
  -7  -6  -4    1.85    0.36
   7   6   4    1.47    0.47
   7   6   4    1.71    0.67
  -8  -6  -4    0.91    0.29
  -8  -6  -4    0.45    0.51
  -8  -6  -4    0.28    0.30
  -8  -6  -4    1.06    0.46
  -8  -6  -4    0.92    0.40
   8   6   4    0.39    0.72
  -9  -6  -4    2.48    0.40
 -10  -6  -4    0.49    0.26
 -10  -6  -4    0.67    0.31
  11   6   4   16.93    1.41
  -7   7   4    9.04    0.63
  -7   7   4    8.05    0.64
  -7   7   4    8.24    0.72
   6  -7  -4    8.58    0.87
  -6   7   4    7.60    0.65
  -6   7   4    9.31    0.65
  -6   7   4    8.00    0.63
   5  -7  -4   15.80    1.43
  -5   7   4   18.41    1.25
  -5   7   4   17.52    1.27
   4  -7  -4    1.53    0.35
   4  -7  -4    1.74    0.38
  -4   7   4    2.08    0.24
  -4   7   4    1.56    0.34
  -4   7   4    1.90    0.25
   3  -7  -4    1.47    0.34
  -3   7   4    1.59    0.22
  -3   7   4    1.52    0.34
  -3   7   4    1.66    0.23
  -2   7   4    0.23    0.16
  -2   7   4    0.29    0.16
  -2   7   4    0.24    0.11
  -2   7   4    0.38    0.26
  -2   7   4    0.04    0.14
  -2   7   4    0.49    0.16
  -1   7   4   70.75    4.76
  -1   7   4   70.55    4.76
  -1   7   4   66.12    4.75
  -1   7   4   70.20    4.76
  -1   7   4   64.26    4.76
   0  -7  -4   12.85    0.94
   0  -7  -4   12.62    1.01
   0  -7  -4   11.55    1.03
   0   7   4   12.57    0.89
   0   7   4   12.76    0.89
   0   7   4   11.34    0.91
   0   7   4   12.33    0.92
  -1  -7  -4   26.32    2.12
  -1  -7  -4   26.13    2.11
   1   7   4   29.00    2.11
   1   7   4   26.69    1.99
   1   7   4   32.16    2.02
   1   7   4   29.15    2.00
  -2  -7  -4    3.41    0.53
  -2  -7  -4    3.71    0.52
   2   7   4    3.56    0.31
   2   7   4    3.86    0.41
   2   7   4    3.68    0.42
   2   7   4    3.65    0.51
  -3  -7  -4    5.05    0.85
  -3  -7  -4    4.94    0.50
  -3  -7  -4    4.37    0.64
   3   7   4    4.96    0.52
   3   7   4    5.43    0.90
   3   7   4    4.81    0.47
   3   7   4    3.53    0.57
  -4  -7  -4   77.85    5.22
  -4  -7  -4   78.71    5.12
  -4  -7  -4   69.86    5.12
  -4  -7  -4   79.40    5.30
   4   7   4   65.52    5.08
   4   7   4   68.30    5.27
  -5  -7  -4   11.62    1.17
  -5  -7  -4   10.51    1.11
   5   7   4    9.78    0.94
   5   7   4   10.08    0.82
  -6  -7  -4    0.61    0.33
  -6  -7  -4    0.50    0.49
  -6  -7  -4    0.84    0.29
  -6  -7  -4    0.74    0.36
  -6  -7  -4    0.67    0.43
   6   7   4    0.68    0.20
   6   7   4    0.56    0.39
   6   7   4    0.09    0.55
  -7  -7  -4    1.38    0.39
  -7  -7  -4    0.79    0.45
  -7  -7  -4    1.33    0.31
  -7  -7  -4    1.28    0.33
   7   7   4    1.18    0.42
   7   7   4    0.63    0.66
   7   7   4    0.32    0.40
   7   7   4    0.79    0.19
  -8  -7  -4    5.36    0.72
  -8  -7  -4    5.68    0.65
   8   7   4    6.37    0.54
   8   7   4    6.78    0.82
  -9  -7  -4    0.72    0.34
   9   7   4    1.42    0.42
  10   7   4    8.46    0.88
  11   7   4    1.29    0.22
  11   7   4    0.97    0.34
  -7   8   4    5.71    0.43
  -7   8   4    5.83    0.42
  -7   8   4    5.08    0.50
   6  -8  -4    0.27    0.26
  -6   8   4    0.40    0.13
  -6   8   4    0.41    0.10
  -6   8   4    0.49    0.11
  -6   8   4    0.34    0.24
   5  -8  -4    3.63    0.62
  -5   8   4    4.43    0.37
  -5   8   4    3.98    0.40
  -5   8   4    3.52    0.52
  -5   8   4    4.80    0.43
   4  -8  -4    0.31    0.28
  -4   8   4    0.43    0.12
  -4   8   4    0.42    0.30
  -4   8   4    0.42    0.17
  -4   8   4    0.37    0.17
  -4   8   4    0.37    0.15
  -3   8   4    7.99    0.82
  -3   8   4    9.38    0.72
  -3   8   4    8.95    0.75
  -3   8   4   10.62    0.75
  -3   8   4    9.28    0.70
  -2   8   4   11.53    0.83
  -2   8   4   11.08    0.84
  -2   8   4   12.01    0.86
  -2   8   4   10.98    0.86
  -2   8   4    9.60    0.92
  -1   8   4   24.20    1.82
  -1   8   4   25.62    1.84
  -1   8   4   25.23    1.89
  -1   8   4   25.72    1.84
  -1   8   4   28.37    1.83
   0   8   4    5.02    0.92
   0   8   4    2.91    0.38
   0   8   4    2.94    0.45
   0   8   4    3.14    0.32
   0   8   4    3.94    0.41
   0   8   4    3.82    0.35
  -1  -8  -4    0.32    0.40
  -1  -8  -4    0.82    0.31
   1   8   4    0.51    0.24
   1   8   4    0.90    0.17
   1   8   4    0.78    0.17
   1   8   4    0.68    0.15
   1   8   4    0.42    0.49
   1   8   4    0.80    0.14
  -2  -8  -4    1.80    0.53
  -2  -8  -4    2.61    0.46
   2   8   4    2.08    0.31
   2   8   4    1.64    0.60
   2   8   4    2.27    0.24
   2   8   4    2.10    0.33
  -3  -8  -4   85.00    5.82
  -3  -8  -4   76.66    5.82
   3   8   4   89.56    5.80
   3   8   4   82.80    5.78
   3   8   4   73.97    5.87
   3   8   4   90.59    6.03
  -4  -8  -4    4.87    0.67
  -4  -8  -4    3.49    0.56
   4   8   4    3.15    0.56
   4   8   4    3.40    0.31
   4   8   4    3.17    0.67
  -5  -8  -4    7.85    0.73
  -5  -8  -4    7.95    1.08
  -5  -8  -4    7.85    0.73
  -5  -8  -4    7.45    0.96
   5   8   4    7.39    0.66
   5   8   4    6.64    0.74
  -6  -8  -4    6.40    0.86
  -6  -8  -4    5.38    0.69
  -6  -8  -4    6.23    0.98
  -6  -8  -4    5.50    0.63
  -6  -8  -4    6.79    0.62
   6   8   4    5.75    0.72
   6   8   4    4.89    0.47
  -7  -8  -4    0.36    0.39
  -7  -8  -4    0.90    0.35
  -7  -8  -4    0.57    0.25
  -7  -8  -4   -0.40    0.45
  -7  -8  -4    0.47    0.29
   7   8   4    0.58    0.20
   7   8   4    0.13    0.34
   7   8   4   -0.18    0.42
   8   8   4   12.97    0.93
   8   8   4   11.37    1.07
  -9  -8  -4    6.49    0.72
   9   8   4    8.92    0.79
  10   8   4    0.53    0.20
  10   8   4    0.96    0.32
  -6   9   4    1.58    0.19
  -6   9   4    1.34    0.24
  -6   9   4    1.76    0.17
   5  -9  -4    0.91    0.25
  -5   9   4    0.94    0.14
  -5   9   4    1.01    0.15
  -5   9   4    1.07    0.18
  -5   9   4    1.03    0.26
   4  -9  -4    0.17    0.25
  -4   9   4    0.36    0.14
  -4   9   4    0.40    0.11
  -4   9   4    0.11    0.14
  -4   9   4    0.40    0.25
  -4   9   4    0.05    0.15
   3  -9  -4    3.26    0.57
  -3   9   4    4.07    0.46
  -3   9   4    4.52    0.46
  -3   9   4    4.60    0.40
  -3   9   4    5.10    0.40
  -3   9   4    3.96    0.54
  -2   9   4   27.64    2.03
  -2   9   4   29.77    2.04
  -1   9   4   57.95    4.22
  -1   9   4   62.82    4.23
  -1   9   4   58.21    4.29
  -1   9   4   63.66    4.23
   0   9   4    0.34    0.25
   0   9   4    0.28    0.16
   0   9   4    0.31    0.53
   0   9   4    0.42    0.17
   0   9   4    0.66    0.17
   1   9   4   14.78    1.14
   1   9   4   15.96    1.10
   1   9   4   13.53    1.51
   1   9   4   14.53    1.09
   1   9   4   14.78    1.07
  -2  -9  -4    9.41    1.12
   2   9   4   10.22    0.75
   2   9   4    9.37    0.73
   2   9   4    8.88    0.69
   2   9   4    7.05    1.25
  -3  -9  -4    4.92    0.64
  -3  -9  -4    5.20    0.72
   3   9   4    4.00    0.42
   3   9   4    3.77    0.35
   3   9   4    2.78    0.74
  -4  -9  -4    0.89    0.28
  -4  -9  -4    0.27    0.53
  -4  -9  -4    0.97    0.32
  -4  -9  -4   -0.10    0.36
  -4  -9  -4    0.25    0.34
   4   9   4    0.32    0.15
   4   9   4    0.57    0.17
   4   9   4   -0.47    0.55
   4   9   4    0.31    0.13
  -5  -9  -4   36.16    2.68
  -5  -9  -4   39.76    2.82
  -5  -9  -4   37.06    2.68
   5   9   4   37.69    2.65
   5   9   4   35.87    2.62
  -6  -9  -4    1.01    0.34
   6   9   4   -0.11    0.47
   6   9   4    1.10    0.45
   6   9   4    0.79    0.29
   6   9   4    0.72    0.16
  -7  -9  -4    1.50    0.33
   7   9   4    0.89    0.17
   7   9   4    1.48    0.32
   7   9   4    0.35    0.42
  -8  -9  -4    3.34    0.50
   8   9   4    2.66    0.33
   8   9   4    3.86    0.52
   9   9   4    3.76    0.37
   9   9   4    3.97    0.50
  -5  10   4    3.74    0.31
  -5  10   4    4.01    0.32
  -4  10   4    0.25    0.11
  -4  10   4    0.04    0.11
  -4  10   4    0.17    0.22
  -3  10   4    9.96    0.92
  -3  10   4   10.94    0.85
  -3  10   4   11.84    0.85
  -3  10   4   12.24    0.83
  -2  10   4    3.51    0.40
  -2  10   4    3.12    0.39
  -2  10   4    3.26    0.31
  -2  10   4    3.87    0.49
  -1  10   4   39.66    2.59
  -1  10   4   35.93    2.64
  -1  10   4   34.70    2.58
  -1  10   4   37.05    2.59
   0  10   4   17.54    1.37
   0  10   4   18.20    1.32
   0  10   4   18.38    1.32
   0  10   4   18.92    1.30
   0  10   4   17.77    1.63
   1  10   4    5.05    0.52
   1  10   4    5.81    0.44
   1  10   4    4.56    0.50
   1  10   4    5.64    0.56
   2  10   4   13.47    0.95
   2  10   4   12.19    0.91
   2  10   4   11.73    0.93
   3  10   4   10.94    0.86
   3  10   4   12.77    0.90
   3  10   4   11.63    0.88
   4  10   4   58.78    4.09
  -5 -10  -4   14.00    1.09
   5  10   4   12.97    1.38
  -6 -10  -4   14.51    1.09
   6  10   4   13.15    1.32
  -7 -10  -4    9.66    0.79
  -8 -10  -4    0.48    0.22
   8  10   4    0.42    0.15
  -3  11   4    0.08    0.10
  -3  11   4    0.12    0.18
  -3  11   4    0.03    0.10
  -3  11   4    0.05    0.08
  -2  11   4   12.36    0.93
  -2  11   4   13.15    0.98
  -1  11   4   12.79    0.97
  -1  11   4   11.72    0.89
  -1  11   4   12.69    0.92
   0  11   4   27.87    2.41
   0  11   4   30.98    2.24
   0  11   4   29.24    2.23
   0  11   4   35.54    2.29
   0  11   4   35.44    2.24
   1  11   4    0.38    0.15
   1  11   4    0.34    0.14
   1  11   4   -0.07    0.46
   2  11   4    9.36    0.70
   2  11   4    8.85    0.67
   2  11   4    8.73    0.70
   3  11   4   10.10    0.77
   3  11   4   10.32    0.80
   3  11   4   11.18    0.79
  -4 -11  -4    0.17    0.24
   4  11   4   -0.05    0.44
  -5 -11  -4    0.24    0.23
   5  11   4    0.03    0.11
   5  11   4   -0.44    0.36
   6  11   4    1.62    0.21
   6  11   4    0.91    0.36
   7  11   4    9.95    0.72
  -1  12   4    5.28    0.41
   0  12   4    0.66    0.14
   0  12   4    0.80    0.11
   1  12   4   -0.12    0.12
   1  12   4   -0.01    0.09
   2  12   4    0.12    0.10
   2  12   4   -0.26    0.34
   3  12   4    0.04    0.12
   3  12   4   -0.40    0.32
   4  12   4    0.57    0.13
   4  12   4   -0.05    0.30
   4  12   4    0.49    0.11
   5  12   4    0.07    0.25
   5  12   4    0.23    0.10
   1  12  -5    3.22    0.38
   1  12  -5    3.93    0.61
   0  12  -5    4.39    0.55
  -1  12  -5    1.40    0.27
  -1  12  -5    0.96    0.52
  -1  12  -5    0.81    0.27
   3  11  -5    0.90    0.43
   3  11  -5    0.92    0.31
   2  11  -5   31.17    2.60
   1  11  -5    1.68    0.67
   1  11  -5    1.27    0.18
   1  11  -5    0.88    0.19
   1  11  -5    1.11    0.37
   0  11  -5    2.19    0.48
   0  11  -5    3.03    0.52
   0  11  -5    3.21    0.33
   0  11  -5    2.80    0.71
   0  11  -5    3.71    0.68
  -1  11  -5    1.40    0.36
  -1  11  -5    1.98    0.39
  -1  11  -5    1.07    0.62
  -1  11  -5    1.39    0.34
  -1  11  -5    1.32    0.20
  -2  11  -5    0.84    0.63
  -2  11  -5    1.04    0.31
  -2  11  -5    1.66    0.37
  -2  11  -5    1.50    0.34
  -3  11  -5    7.05    0.72
  -3  11  -5    6.27    0.68
  -3  11  -5    8.76    0.68
  -4  11  -5   -0.10    0.24
  -4  11  -5    0.37    0.19
  -5  11  -5    0.50    0.18
  -6  11  -5    4.00    0.36
   5  10  -5   -0.10    0.28
   5  10  -5    0.25    0.44
  -5 -10   5    0.11    0.19
   4  10  -5    0.70    0.49
   4  10  -5    0.03    0.31
  -4 -10   5   -0.02    0.20
   3  10  -5   13.22    1.09
   3  10  -5   13.43    1.54
   3  10  -5   11.78    1.02
  -3 -10   5   10.97    0.93
   2  10  -5    3.38    0.36
   2  10  -5    4.28    0.84
   2  10  -5    3.52    0.60
   2  10  -5    4.55    0.38
   1  10  -5    7.28    0.88
   1  10  -5    8.01    1.23
   1  10  -5    9.35    0.95
   1  10  -5    8.51    0.66
   1  10  -5    7.99    0.84
   0  10  -5    0.54    0.61
   0  10  -5    0.80    0.48
   0  10  -5    0.39    0.32
   0  10  -5    0.63    0.41
   0  10  -5    0.48    0.32
   0  10  -5    0.61    0.21
  -1  10  -5    0.94    0.42
  -1  10  -5    0.65    0.34
  -1  10  -5    1.20    0.23
  -1  10  -5    0.58    0.31
  -1  10  -5    0.04    0.60
  -1  10  -5    0.68    0.41
  -1  10  -5    1.05    0.32
  -2  10  -5   10.52    1.02
  -2  10  -5   10.52    1.00
  -2  10  -5   12.92    0.89
  -2  10  -5   11.45    1.41
  -3  10  -5    0.05    0.24
  -3  10  -5    0.40    0.22
  -3  10  -5   -0.21    0.62
  -3  10  -5   -0.12    0.19
  -3  10  -5    0.08    0.24
  -3  10  -5    0.46    0.18
  -3  10  -5    0.28    0.25
  -3  10  -5    0.07    0.26
  -4  10  -5   10.19    0.84
  -4  10  -5   11.07    0.91
  -4  10  -5    9.08    0.84
  -5  10  -5    3.24    0.39
  -5  10  -5    4.13    0.50
  -5  10  -5    2.42    0.45
  -5  10  -5    3.99    0.41
  -5  10  -5    2.58    0.37
  -5  10  -5    2.72    0.41
  -5  10  -5    4.01    0.39
  -6  10  -5    0.75    0.18
  -6  10  -5    1.04    0.20
  -6  10  -5    0.89    0.19
  -6  10  -5    0.82    0.25
  -7  10  -5   13.50    1.11
  -7  10  -5   15.32    1.08
  -7  10  -5   16.02    1.08
   6   9  -5    1.33    0.36
  -6  -9   5    1.36    0.24
   5   9  -5    3.26    0.64
   5   9  -5    3.06    0.31
   4   9  -5    1.39    0.39
   4   9  -5    1.12    0.51
   4   9  -5    1.24    0.59
  -4  -9   5    1.32    0.28
   3   9  -5    0.09    0.19
   3   9  -5    0.23    0.39
   3   9  -5    0.42    0.36
   3   9  -5    0.12    0.64
  -3  -9   5    0.52    0.26
   2   9  -5   29.78    2.42
   2   9  -5   27.39    2.13
   2   9  -5   29.01    2.38
   2   9  -5   26.14    1.97
   1   9  -5    2.28    0.66
   1   9  -5    1.84    0.47
   1   9  -5    2.28    0.46
   1   9  -5    2.61    0.35
   1   9  -5    2.48    0.57
   1   9  -5    2.44    0.46
  -1  -9   5    3.66    0.72
   0   9  -5   62.23    4.16
   0   9  -5   63.02    4.27
   0   9  -5   57.49    4.17
   0   9  -5   55.08    4.44
  -1   9  -5   91.50    6.50
  -1   9  -5   92.13    6.50
  -1   9  -5  100.13    6.60
  -1   9  -5   89.63    6.75
  -2   9  -5   56.85    4.33
  -2   9  -5   56.39    4.30
  -2   9  -5   67.05    4.23
  -2   9  -5   60.80    4.53
  -2   9  -5   67.95    4.25
  -2   9  -5   55.26    4.33
  -2   9  -5   58.21    4.36
  -3   9  -5   57.26    3.74
  -3   9  -5   51.30    3.79
  -3   9  -5   54.78    3.72
  -3   9  -5   54.35    3.75
  -3   9  -5   51.14    3.84
  -3   9  -5   49.32    3.80
  -4   9  -5    3.84    0.49
  -4   9  -5    3.34    0.46
  -4   9  -5    3.24    0.59
  -4   9  -5    3.00    0.46
  -4   9  -5    4.60    0.46
  -4   9  -5    3.57    0.54
  -4   9  -5    4.00    0.47
  -4   9  -5    4.64    0.49
  -4   9  -5    3.38    0.52
  -4   9  -5    4.50    0.91
  -5   9  -5   14.85    1.07
  -5   9  -5   11.82    1.04
  -5   9  -5   13.33    1.04
  -5   9  -5   13.38    1.03
  -5   9  -5   13.49    1.03
  -6   9  -5    3.01    0.36
  -6   9  -5    2.28    0.37
  -6   9  -5    2.12    0.30
  -6   9  -5    2.22    0.30
  -6   9  -5    1.75    0.43
  -6   9  -5    2.41    0.31
  -7   9  -5   15.92    1.14
  -7   9  -5   14.64    1.14
  -7   9  -5   16.22    1.14
  -7   9  -5   15.13    1.15
  -8   9  -5    1.52    0.22
  -8   9  -5    1.98    0.22
  -8   9  -5    1.73    0.25
  -8   9  -5    1.13    0.29
   7   8  -5    0.54    0.35
   7   8  -5    0.19    0.16
  -7  -8   5    0.21    0.18
   6   8  -5    0.49    0.46
   6   8  -5   -0.02    0.38
  -6  -8   5    0.07    0.22
   5   8  -5    4.05    0.69
   5   8  -5    3.38    0.35
   4   8  -5    5.31    0.89
   4   8  -5    3.65    0.38
   4   8  -5    3.91    0.66
   3   8  -5   75.65    5.40
   3   8  -5   80.18    5.11
   3   8  -5   63.43    5.22
   3   8  -5   69.50    5.16
   3   8  -5   76.97    5.34
  -3  -8   5   77.22    5.13
  -3  -8   5   77.69    5.13
  -3  -8   5   64.55    5.13
  -3  -8   5   69.21    5.11
   2   8  -5   11.09    1.28
   2   8  -5    9.25    0.97
   2   8  -5    9.83    1.03
   2   8  -5    7.70    1.57
   2   8  -5   10.36    1.02
   2   8  -5   11.44    0.78
   2   8  -5    9.42    1.01
  -2  -8   5   10.68    0.92
   1   8  -5   25.23    2.12
   1   8  -5   22.22    1.94
   1   8  -5   26.98    1.93
   1   8  -5   26.85    1.78
   1   8  -5   24.77    2.26
   1   8  -5   24.03    1.93
  -1  -8   5   24.49    1.86
   0   8  -5   63.96    4.65
   0   8  -5   57.11    4.50
   0   8  -5   63.43    4.39
   0   8  -5   67.34    4.63
   0   8  -5   64.45    4.41
   0   8  -5   58.49    4.53
   0   8  -5   70.25    4.49
   0  -8   5   57.76    4.43
  -1   8  -5   40.22    2.71
  -1   8  -5   40.72    2.73
  -1   8  -5   36.78    2.82
  -1   8  -5   34.94    2.81
  -1   8  -5   42.04    2.82
  -1   8  -5   42.15    2.99
  -1   8  -5   37.14    2.84
  -1   8  -5   37.51    2.99
   1  -8   5   34.60    2.76
  -2   8  -5    9.19    0.74
  -2   8  -5   10.13    1.16
  -2   8  -5    8.31    0.79
  -2   8  -5    9.33    0.79
  -2   8  -5    8.86    0.86
  -2   8  -5    7.80    0.80
  -2   8  -5    7.23    0.82
  -2   8  -5    8.92    0.80
  -2   8  -5   10.67    1.26
   2  -8   5    6.90    0.80
  -3   8  -5  136.51   10.32
  -3   8  -5  159.68   10.31
  -3   8  -5  147.47   10.41
  -3   8  -5  158.65   10.31
  -3   8  -5  144.92   10.39
  -3   8  -5  154.02   10.36
   3  -8   5  138.37   10.35
  -4   8  -5    2.95    0.37
  -4   8  -5    2.69    0.44
  -4   8  -5    3.88    0.44
  -4   8  -5    3.19    0.49
  -4   8  -5    3.42    0.76
  -4   8  -5    2.07    0.48
  -4   8  -5    2.86    0.40
  -4   8  -5    3.17    0.41
  -4   8  -5    2.85    0.44
  -4   8  -5    4.71    0.84
   4  -8   5    2.61    0.40
  -5   8  -5    5.60    0.86
  -5   8  -5    7.41    0.67
  -5   8  -5    6.25    0.63
  -5   8  -5    5.82    0.97
  -5   8  -5    7.94    0.66
  -5   8  -5    8.05    0.68
  -5   8  -5    7.16    0.62
  -6   8  -5    0.57    0.27
  -6   8  -5    0.73    0.22
  -6   8  -5    1.43    0.26
  -6   8  -5    1.84    0.34
  -6   8  -5    1.17    0.21
  -6   8  -5    0.93    0.25
  -6   8  -5    2.19    0.79
  -6   8  -5    1.28    0.48
  -6   8  -5    1.27    0.30
  -7   8  -5    0.46    0.21
  -7   8  -5    0.39    0.18
  -7   8  -5    0.25    0.19
  -7   8  -5    0.35    0.26
  -7   8  -5    0.40    0.41
  -7   8  -5    0.59    0.28
  -7   8  -5    0.29    0.14
  -8   8  -5    0.14    0.12
  -8   8  -5    0.42    0.17
  -8   8  -5    0.25    0.17
  -8   8  -5    0.50    0.22
  -8   8  -5    0.02    0.36
  -8   8  -5    0.25    0.14
  -9   8  -5   16.55    1.12
  -9   8  -5   14.42    1.13
  -9   8  -5   15.54    1.13
   7   7  -5    5.58    0.94
  -7  -7   5    5.47    0.53
   6   7  -5    0.32    0.50
   6   7  -5    0.97    0.46
   6   7  -5   -0.77    0.67
  -6  -7   5    0.67    0.26
   5   7  -5   18.95    1.62
   5   7  -5   17.85    1.65
   5   7  -5   19.60    2.12
   4   7  -5   35.95    2.93
   4   7  -5   40.97    3.14
   4   7  -5   35.66    2.77
   4   7  -5   33.91    3.06
   4   7  -5   37.63    2.87
  -4  -7   5   40.26    2.78
  -4  -7   5   40.72    2.79
  -4  -7   5   41.97    2.80
  -4  -7   5   44.02    3.15
  -4  -7   5   35.95    2.79
   3   7  -5   32.42    2.60
   3   7  -5   32.34    2.79
   3   7  -5   31.78    2.66
   3   7  -5   32.59    2.65
   3   7  -5   37.75    2.54
   3   7  -5   33.43    2.84
  -3  -7   5   35.30    2.54
  -3  -7   5   39.21    2.54
  -3  -7   5   34.93    2.55
  -3  -7   5   39.05    2.54
   2   7  -5    0.18    0.30
   2   7  -5    0.46    0.33
   2   7  -5    0.78    0.33
   2   7  -5    0.54    0.17
   2   7  -5    0.34    0.48
  -2  -7   5    0.49    0.26
  -2  -7   5    0.81    0.32
  -2  -7   5    0.69    0.27
  -2  -7   5    0.47    0.25
   1   7  -5   70.41    4.93
   1   7  -5   66.92    4.83
   1   7  -5   60.22    4.82
   1   7  -5   67.61    4.70
   1   7  -5   73.41    4.93
   1   7  -5   67.13    4.78
  -1  -7   5   66.52    4.74
   0   7  -5    5.85    0.88
   0   7  -5    5.57    0.63
   0   7  -5    5.21    1.22
   0   7  -5    6.24    0.70
   0   7  -5    5.39    0.67
   0   7  -5    5.92    0.49
   0   7  -5    4.60    0.62
   0   7  -5    6.53    0.66
   0   7  -5    7.00    0.71
   0  -7   5    6.38    0.61
  -1   7  -5    5.56    0.68
  -1   7  -5    5.44    1.20
  -1   7  -5    5.90    0.64
  -1   7  -5    5.80    0.60
  -1   7  -5    6.04    0.63
  -1   7  -5    6.13    0.49
  -1   7  -5    5.56    0.59
  -1   7  -5    6.40    0.89
  -1   7  -5    5.72    0.58
  -1   7  -5    4.76    0.59
   1  -7   5    5.84    0.61
  -2   7  -5   46.70    3.19
  -2   7  -5   40.50    3.20
  -2   7  -5   45.32    3.25
  -2   7  -5   50.34    3.39
  -2   7  -5   41.81    3.26
  -2   7  -5   42.85    3.27
  -2   7  -5   47.29    3.20
  -2   7  -5   44.20    3.24
  -2   7  -5   49.19    3.43
  -2   7  -5   48.52    3.21
   2  -7   5   43.40    3.24
  -3   7  -5   12.04    0.95
  -3   7  -5   12.72    0.98
  -3   7  -5   11.70    1.00
  -3   7  -5   12.20    0.94
  -3   7  -5   10.90    1.05
  -3   7  -5   11.05    0.93
  -3   7  -5   14.11    1.32
  -3   7  -5   12.85    0.92
  -3   7  -5   11.40    0.97
  -3   7  -5   10.94    1.39
  -3   7  -5   12.69    0.98
  -4   7  -5    5.79    0.66
  -4   7  -5    6.97    0.63
  -4   7  -5    6.85    0.67
  -4   7  -5    6.68    0.63
  -4   7  -5    7.58    0.70
  -4   7  -5    5.83    0.83
  -4   7  -5    6.35    0.60
  -4   7  -5    7.91    0.60
  -4   7  -5    7.29    1.09
  -4   7  -5    6.90    0.69
  -4   7  -5    6.30    0.64
  -4   7  -5    7.62    0.66
  -5   7  -5    2.26    0.36
  -5   7  -5    2.77    0.37
  -5   7  -5    1.82    0.53
  -5   7  -5    3.59    0.76
  -5   7  -5    2.48    0.35
  -5   7  -5    2.13    0.32
  -5   7  -5    2.01    0.29
  -5   7  -5    2.10    0.59
  -5   7  -5    1.63    0.27
  -5   7  -5    2.47    0.35
  -6   7  -5    2.70    0.34
  -6   7  -5    2.35    0.32
  -6   7  -5    3.04    0.43
  -6   7  -5    3.37    0.47
  -6   7  -5    2.01    0.37
  -6   7  -5    2.46    0.40
  -6   7  -5    1.89    0.54
  -6   7  -5    3.29    0.39
  -6   7  -5    1.85    0.53
  -7   7  -5    1.69    0.29
  -7   7  -5    1.53    0.24
  -7   7  -5    1.47    0.24
  -7   7  -5    1.73    0.29
  -7   7  -5    2.11    0.36
  -7   7  -5    1.91    0.54
  -7   7  -5    1.03    0.42
  -8   7  -5    3.89    0.43
  -8   7  -5    3.61    0.37
  -8   7  -5    3.53    0.58
  -8   7  -5    3.43    0.46
  -8   7  -5    4.08    0.49
  -9   7  -5    1.48    0.19
  -9   7  -5    1.55    0.26
  -9   7  -5    1.36    0.19
  -9   7  -5    1.26    0.24
  -9   7  -5    1.36    0.40
 -10   7  -5    0.44    0.11
 -10   7  -5    0.16    0.24
 -10   7  -5    0.45    0.16
 -10   7  -5    0.48    0.15
   8   6  -5    1.94    0.60
  -8  -6   5    1.95    0.30
   7   6  -5   11.25    1.59
   7   6  -5   13.42    1.12
   7   6  -5   14.97    1.33
  -7  -6   5   11.74    0.98
   6   6  -5   -1.09    0.82
   6   6  -5    0.82    0.47
  -6  -6   5    0.33    0.24
   5   6  -5    1.13    0.46
  -5  -6   5    0.42    0.52
  -5  -6   5    0.76    0.29
  -5  -6   5    0.91    0.30
  -5  -6   5    1.24    0.39
  -5  -6   5    0.81    0.31
   4   6  -5    0.47    0.73
   4   6  -5    1.37    0.55
   4   6  -5    1.58    0.44
  -4  -6   5    1.37    0.33
  -4  -6   5    0.87    0.31
  -4  -6   5    1.04    0.31
  -4  -6   5    1.28    0.34
   3   6  -5   38.43    3.03
   3   6  -5   35.11    2.97
   3   6  -5   41.80    2.79
   3   6  -5   36.56    2.89
  -3  -6   5   42.45    2.77
  -3  -6   5   41.01    2.77
  -3  -6   5   36.49    2.78
  -3  -6   5   36.96    2.79
   2   6  -5   30.39    2.41
   2   6  -5   27.75    2.30
   2   6  -5   28.36    2.30
   2   6  -5   32.83    2.46
  -2  -6   5   32.96    2.20
  -2  -6   5   29.17    2.24
  -2  -6   5   32.60    2.20
  -2  -6   5   31.04    2.22
   1   6  -5   36.62    2.61
   1   6  -5   32.17    2.44
   1   6  -5   35.01    2.48
   1   6  -5   31.96    2.56
   1   6  -5   30.70    2.47
  -1  -6   5   34.85    2.40
   0   6  -5   42.87    3.01
   0   6  -5   39.06    3.04
   0   6  -5   42.84    3.14
   0   6  -5   43.08    3.02
   0   6  -5   44.65    3.07
   0   6  -5   39.11    3.04
   0  -6   5   42.84    2.98
  -1   6  -5   63.27    4.43
  -1   6  -5   57.95    4.33
  -1   6  -5   61.05    4.32
  -1   6  -5   58.02    4.36
  -1   6  -5   64.61    4.31
   1  -6   5   61.15    4.28
  -2   6  -5    9.09    0.82
  -2   6  -5   10.34    0.82
  -2   6  -5   10.93    0.79
  -2   6  -5    9.93    1.02
  -2   6  -5   10.11    0.79
  -2   6  -5   10.15    0.80
  -2   6  -5   10.12    0.81
  -2   6  -5    9.01    0.87
  -2   6  -5   11.51    1.24
  -2   6  -5    9.17    0.83
  -2   6  -5   11.68    1.17
  -3   6  -5   11.07    0.85
  -3   6  -5   10.57    0.96
  -3   6  -5   11.55    0.85
  -3   6  -5    9.45    0.90
  -3   6  -5   10.43    0.86
  -3   6  -5   11.98    0.82
  -3   6  -5   10.29    0.87
  -3   6  -5   10.59    0.89
  -3   6  -5   11.16    0.85
  -4   6  -5    5.67    0.52
  -4   6  -5    5.88    0.50
  -4   6  -5    5.34    0.75
  -4   6  -5    5.75    0.51
  -4   6  -5    5.57    0.91
  -4   6  -5    5.16    0.51
  -4   6  -5    5.49    0.54
  -5   6  -5    7.45    0.70
  -5   6  -5    8.22    1.03
  -5   6  -5    8.41    0.70
  -5   6  -5    7.52    0.64
  -5   6  -5    6.85    0.67
  -5   6  -5    5.81    0.89
  -5   6  -5    8.98    0.70
  -6   6  -5    0.86    0.25
  -6   6  -5    0.98    0.24
  -6   6  -5    1.03    0.26
  -6   6  -5    0.89    0.47
  -6   6  -5    0.86    0.20
  -6   6  -5    0.88    0.30
  -6   6  -5    0.74    0.49
  -6   6  -5    1.58    0.30
  -6   6  -5    2.00    0.67
  -6   6  -5    1.04    0.22
  -7   6  -5    0.33    0.29
  -7   6  -5    0.38    0.18
  -7   6  -5    0.41    0.18
  -7   6  -5    0.54    0.45
  -7   6  -5    0.81    0.29
  -7   6  -5    0.35    0.49
  -7   6  -5    0.31    0.20
  -7   6  -5    0.54    0.25
  -8   6  -5    0.23    0.47
  -8   6  -5    0.49    0.26
  -8   6  -5    0.51    0.18
  -8   6  -5    0.20    0.47
  -8   6  -5    0.27    0.20
  -8   6  -5    0.27    0.28
  -8   6  -5    0.26    0.18
  -9   6  -5    0.96    0.26
  -9   6  -5    0.47    0.23
  -9   6  -5    0.79    0.18
  -9   6  -5    0.63    0.17
  -9   6  -5    1.08    0.23
  -9   6  -5    0.72    0.40
 -10   6  -5    0.60    0.15
 -10   6  -5    0.73    0.20
 -10   6  -5    0.68    0.20
 -10   6  -5    0.20    0.30
 -10   6  -5    0.91    0.16
 -11   6  -5    0.67    0.11
 -11   6  -5    0.46    0.13
 -11   6  -5    0.62    0.14
   8   5  -5    7.34    1.32
  -8  -5   5    6.75    0.57
  -7  -5   5   13.79    1.05
   6   5  -5   -0.99    0.93
   6   5  -5    0.67    0.26
  -6  -5   5    1.55    0.44
   5   5  -5    3.19    1.03
   5   5  -5    6.12    0.75
  -5  -5   5    6.51    0.83
  -5  -5   5    4.94    0.61
  -5  -5   5    5.23    0.60
  -5  -5   5    5.59    0.59
  -5  -5   5    4.48    0.67
   4   5  -5   40.90    3.03
   4   5  -5   33.43    2.92
   4   5  -5   34.04    3.04
   4   5  -5   41.09    2.86
  -4  -5   5   38.61    2.72
  -4  -5   5   41.58    2.72
  -4  -5   5   37.22    2.74
  -4  -5   5   36.61    2.73
   3   5  -5   11.19    1.17
   3   5  -5   11.46    1.28
   3   5  -5   11.81    1.03
   3   5  -5   10.54    0.99
   3   5  -5   12.09    1.34
  -3  -5   5   12.41    0.93
  -3  -5   5   11.47    0.95
  -3  -5   5   12.03    0.92
  -3  -5   5   11.39    1.00
   2   5  -5   69.45    5.04
   2   5  -5   75.36    5.08
   2   5  -5   61.94    5.07
  -2  -5   5   76.00    4.94
  -2  -5   5   68.26    4.94
  -2  -5   5   72.62    4.95
   1   5  -5    8.70    0.80
   1   5  -5    9.31    0.91
   1   5  -5    8.28    0.91
  -1  -5   5    8.98    0.71
  -1  -5   5    9.45    0.71
  -1  -5   5    9.25    0.73
   0  -5   5   13.19    1.00
  -1   5  -5   19.68    1.72
   1  -5   5   19.96    1.45
  -2   5  -5   43.65    3.29
  -4   5  -5   17.75    1.47
  -4   5  -5   19.45    1.45
  -4   5  -5   20.32    1.56
  -4   5  -5   21.17    1.45
  -5   5  -5   13.40    1.10
  -5   5  -5   15.13    1.09
  -5   5  -5   13.63    1.22
  -5   5  -5   13.54    1.05
  -6   5  -5   33.01    2.29
  -6   5  -5   30.74    2.29
  -6   5  -5   34.23    2.28
  -6   5  -5   28.24    2.29
  -7   5  -5    7.50    0.67
  -7   5  -5    8.72    1.01
  -7   5  -5    7.91    0.68
  -7   5  -5    8.28    0.72
  -7   5  -5    7.52    0.74
  -7   5  -5    9.42    0.97
   7  -5   5    7.10    1.29
  -8   5  -5   33.88    2.54
  -8   5  -5   36.78    2.44
  -8   5  -5   32.04    2.41
  -8   5  -5   33.09    2.41
  -8   5  -5   34.59    2.38
  -8   5  -5   30.76    2.59
  -8   5  -5   32.09    2.39
  -9   5  -5   40.89    2.98
  -9   5  -5   44.02    3.06
  -9   5  -5   42.28    2.93
  -9   5  -5   41.06    2.96
   9  -5   5   39.73    2.97
 -10   5  -5   10.08    0.90
 -10   5  -5    9.34    0.80
 -10   5  -5    9.53    0.78
 -10   5  -5    8.95    0.75
  10  -5   5   10.71    0.89
 -11   5  -5    3.54    0.35
 -11   5  -5    3.72    0.32
 -11   5  -5    3.10    0.36
  11  -5   5    2.81    0.47
   9   4  -5    1.97    0.60
   9   4  -5    3.30    0.59
   8   4  -5    0.44    0.85
   7   4  -5   -1.23    0.98
  -6  -4   5    0.83    0.23
  -6  -4   5    0.83    0.25
  -6  -4   5    0.80    0.37
  -6  -4   5    1.15    0.36
   5   4  -5   21.94    1.58
   5   4  -5   17.87    2.13
  -5  -4   5   19.16    1.51
  -5  -4   5   19.82    1.47
  -5  -4   5   18.58    1.46
  -5  -4   5   19.86    1.47
   4   4  -5   54.29    4.43
   4   4  -5   54.21    4.32
  -4  -4   5   64.39    4.15
  -4  -4   5   61.53    4.15
  -4  -4   5   59.03    4.16
  -4  -4   5   59.29    4.16
   3   4  -5   97.07    6.78
  -3  -4   5  100.82    6.68
  -3  -4   5   93.57    6.68
  -3  -4   5   92.31    6.68
  -3  -4   5   95.42    6.70
  -2  -4   5   54.42    3.81
  -2  -4   5   57.27    3.81
  -2  -4   5   51.67    3.81
  -1  -4   5   41.75    2.96
  -1  -4   5   43.13    2.96
  -1  -4   5   41.65    2.95
  -1   4  -5   57.83    4.22
  -3   4  -5    9.06    0.93
  -5   4  -5    5.02    0.51
  -5   4  -5    4.57    0.46
  -5   4  -5    6.47    0.77
  -6   4  -5   18.26    1.36
  -6   4  -5   20.42    1.36
  -6   4  -5   16.98    1.37
  -6   4  -5   16.64    1.31
  -7   4  -5   12.65    1.10
  -7   4  -5   16.64    1.32
  -7   4  -5   12.84    1.06
  -7   4  -5   12.42    1.03
  -7   4  -5   14.44    1.09
  -7   4  -5   15.77    1.08
   7  -4   5   12.64    1.58
  -8   4  -5    5.98    0.60
  -8   4  -5    6.48    0.57
  -8   4  -5    5.69    0.65
  -8   4  -5    6.43    0.91
  -8   4  -5    7.35    0.69
  -8   4  -5    7.39    0.87
  -8   4  -5    6.90    0.66
   8  -4   5    7.72    0.69
   8  -4   5    5.94    1.05
  -9   4  -5   24.21    2.00
  -9   4  -5   29.78    2.12
  -9   4  -5   29.14    2.01
  -9   4  -5   25.26    2.03
  -9   4  -5   29.75    2.02
  -9   4  -5   25.26    2.00
   9  -4   5   31.91    2.69
   9  -4   5   28.51    2.04
   9  -4   5   26.33    2.05
 -10   4  -5   71.09    5.06
 -10   4  -5   71.60    5.00
 -10   4  -5   74.81    5.00
  10  -4   5   68.13    5.03
 -11   4  -5    3.69    0.39
 -11   4  -5    3.31    0.36
 -11   4  -5    3.56    0.41
  11  -4   5    3.64    0.60
   8   3  -5   10.92    1.66
  -8  -3   5   10.77    0.92
   7   3  -5   -0.56    1.01
  -7  -3   5    1.47    0.33
   6   3  -5    8.43    1.37
  -6  -3   5    9.42    0.78
  -6  -3   5    9.37    0.83
  -6  -3   5    8.92    0.86
  -6  -3   5    9.84    0.77
   5   3  -5    5.02    1.08
  -5  -3   5    5.10    0.53
  -5  -3   5    5.27    0.55
  -5  -3   5    5.29    0.53
  -5  -3   5    5.52    0.62
   4   3  -5  113.07    7.66
  -4  -3   5  107.85    7.57
  -4  -3   5  107.12    7.56
  -4  -3   5  106.70    7.56
   3   3  -5    7.04    0.95
  -3  -3   5    5.58    0.54
  -3  -3   5    5.68    0.52
  -3  -3   5    6.08    0.52
  -3  -3   5    6.26    0.60
  -1  -3   5   22.18    1.64
  -1  -3   5   23.88    1.64
  -1  -3   5   23.24    1.63
   0  -3   5    1.67    0.20
   0  -3   5    1.76    0.22
   0  -3   5    1.97    0.25
  -2   3  -5   53.30    3.85
  -4   3  -5   48.40    3.50
  -5   3  -5    2.28    0.44
  -6   3  -5    5.68    0.54
  -6   3  -5    7.03    0.78
  -6   3  -5    6.70    0.57
  -6   3  -5    5.79    0.95
  -6   3  -5    5.94    0.52
   6  -3   5    6.08    0.60
   6  -3   5    5.76    1.01
  -7   3  -5    0.77    0.15
  -7   3  -5    0.75    0.24
  -7   3  -5    0.52    0.36
  -7   3  -5    0.68    0.22
  -7   3  -5    0.53    0.55
  -7   3  -5    0.79    0.24
  -7   3  -5    1.29    0.46
  -7   3  -5    0.79    0.21
  -7   3  -5    0.82    0.26
   7  -3   5    1.58    0.32
   7  -3   5    0.80    0.65
  -8   3  -5   19.71    1.53
  -8   3  -5   18.62    1.56
  -8   3  -5   22.37    1.92
  -8   3  -5   21.08    1.60
  -8   3  -5   23.78    1.78
  -8   3  -5   23.28    1.57
   8  -3   5   18.95    1.59
   8  -3   5   22.84    1.60
   8  -3   5   19.88    2.11
  -9   3  -5   10.95    1.18
  -9   3  -5   11.36    1.01
  -9   3  -5    9.91    0.91
  -9   3  -5    9.08    0.91
   9  -3   5   10.46    1.78
   9  -3   5   10.95    1.00
   9  -3   5   11.04    0.97
   9  -3   5   11.88    1.01
 -10   3  -5   18.87    1.37
 -10   3  -5   19.20    1.36
 -10   3  -5   16.35    1.39
  10  -3   5   18.14    1.48
 -11   3  -5    4.34    0.49
 -11   3  -5    4.96    0.44
 -11   3  -5    4.85    0.46
 -11   3  -5    4.54    0.47
  11  -3   5    5.22    0.74
 -12   3  -5    0.57    0.16
 -12   3  -5    0.43    0.13
  12  -3   5    0.97    0.29
   9   2  -5    0.70    0.64
  -9  -2   5    0.88    0.22
   8   2  -5   25.65    2.36
  -8  -2   5   24.05    1.81
   7   2  -5   -1.23    0.92
  -7  -2   5    0.10    0.27
   6   2  -5   22.88    2.65
  -6  -2   5   27.68    1.99
  -6  -2   5   26.15    1.94
  -6  -2   5   27.64    1.92
  -6  -2   5   28.05    1.98
   5   2  -5   17.51    2.15
  -5  -2   5   19.80    1.43
  -5  -2   5   18.76    1.39
  -5  -2   5   19.90    1.39
  -5  -2   5   16.90    1.40
  -5  -2   5   19.92    1.40
   4   2  -5   14.10    1.84
  -4  -2   5   15.53    1.21
  -4  -2   5   15.98    1.19
  -4  -2   5   16.30    1.19
  -4  -2   5   17.68    1.22
  -3  -2   5   51.87    3.75
  -3  -2   5   53.83    3.75
  -3  -2   5   55.13    3.75
  -2  -2   5  185.06   13.11
   1   2  -5   46.49    3.15
  -1  -2   5   44.37    3.06
  -1  -2   5   40.75    3.06
   2  -2   5   31.00    2.22
   2  -2   5   32.43    2.22
  -3   2  -5   57.70    4.06
  -4   2  -5   11.81    0.95
  -4   2  -5   10.53    0.85
  -5   2  -5   28.12    2.01
  -5   2  -5   26.29    2.08
  -5   2  -5   24.94    1.91
   5  -2   5   29.49    2.12
   5  -2   5   25.42    1.91
  -6   2  -5   11.40    0.98
  -6   2  -5    9.65    1.14
   6  -2   5   10.39    0.84
   6  -2   5   10.84    0.82
   6  -2   5    7.74    1.14
  -7   2  -5    0.39    0.21
  -7   2  -5    0.36    0.30
  -7   2  -5    0.16    0.17
  -7   2  -5    0.37    0.22
  -7   2  -5    0.26    0.54
  -7   2  -5    0.30    0.18
  -7   2  -5    0.28    0.21
  -7   2  -5    0.51    0.43
   7  -2   5   -0.31    0.55
   7  -2   5    0.86    0.29
   7  -2   5    0.98    0.28
  -8   2  -5    0.57    0.27
  -8   2  -5    1.45    0.54
  -8   2  -5    0.64    0.26
  -8   2  -5    0.68    0.34
  -8   2  -5    0.63    0.24
  -8   2  -5    0.54    0.25
  -8   2  -5    0.46    0.64
  -8   2  -5    0.54    0.24
   8  -2   5    0.53    0.72
   8  -2   5    1.09    0.29
  -9   2  -5    1.77    0.63
  -9   2  -5    0.92    0.29
  -9   2  -5    1.18    0.29
  -9   2  -5    1.02    0.28
  -9   2  -5    0.69    0.26
  -9   2  -5    1.99    0.76
  -9   2  -5    1.32    0.39
  -9   2  -5    0.73    0.29
   9  -2   5    1.03    0.95
   9  -2   5    1.97    0.42
   9  -2   5    1.83    0.42
 -10   2  -5    1.93    0.40
 -10   2  -5    1.43    0.33
 -10   2  -5    1.21    0.32
 -10   2  -5    1.47    0.30
 -10   2  -5    1.09    0.28
 -10   2  -5    1.33    0.63
 -10   2  -5    1.94    0.79
  10  -2   5    1.29    0.45
  10  -2   5    1.35    0.99
  10  -2   5    0.83    0.47
 -11   2  -5    0.26    0.21
 -11   2  -5    0.37    0.24
 -11   2  -5    0.29    0.20
 -11   2  -5    0.09    0.21
 -11   2  -5    0.36    0.22
  11  -2   5    0.57    0.41
 -12   2  -5    0.84    0.19
 -12   2  -5    0.99    0.19
  12  -2   5    0.88    0.35
   9   1  -5    1.21    0.48
  -9  -1   5    0.75    0.23
   8   1  -5   20.65    2.11
  -8  -1   5   18.57    1.52
  -8  -1   5   22.04    1.46
   7   1  -5    0.93    0.98
  -7  -1   5    1.05    0.36
  -7  -1   5    0.60    0.27
  -7  -1   5    0.48    0.10
   6   1  -5    1.91    1.01
   6   1  -5    2.34    0.48
  -6  -1   5    1.56    0.22
  -6  -1   5    1.35    0.34
  -6  -1   5    1.23    0.29
   5   1  -5    2.08    0.41
   5   1  -5    2.11    0.61
   5   1  -5    2.25    0.96
  -5  -1   5    1.37    0.31
  -5  -1   5    1.22    0.24
  -5  -1   5    1.24    0.22
  -5  -1   5    1.51    0.23
   4   1  -5    1.16    0.34
   4   1  -5    0.59    0.39
   4   1  -5    0.87    0.52
  -4  -1   5    0.33    0.22
  -4  -1   5    0.77    0.54
  -4  -1   5    0.70    0.19
  -4  -1   5    0.87    0.18
  -4  -1   5    0.73    0.17
   3   1  -5   47.90    3.41
  -3  -1   5   44.96    3.47
  -3  -1   5   48.61    3.26
  -3  -1   5   45.21    3.26
  -3  -1   5   45.76    3.25
   2   1  -5   15.37    1.19
  -2  -1   5   11.85    0.98
  -2  -1   5   13.42    0.98
  -2  -1   5   13.66    1.23
  -2  -1   5   14.24    0.98
   0  -1   5   90.20    6.54
  -2   1  -5    1.58    0.22
   2  -1   5    1.12    0.16
   2  -1   5    1.22    0.18
  -3   1  -5   22.61    1.54
   3  -1   5   18.69    1.45
  -4   1  -5    1.45    0.22
  -4   1  -5    2.05    0.42
  -4   1  -5    1.76    0.31
   4  -1   5    1.88    0.42
   4  -1   5    1.61    0.24
   4  -1   5    1.89    0.24
  -5   1  -5   10.40    1.15
  -5   1  -5   12.20    0.91
  -5   1  -5   12.38    1.01
   5  -1   5   13.41    0.92
   5  -1   5   12.18    0.92
   5  -1   5   11.14    1.15
  -6   1  -5    0.96    0.21
  -6   1  -5    0.71    0.47
   6  -1   5    1.31    0.25
   6  -1   5    1.17    0.24
  -7   1  -5   18.86    1.30
  -7   1  -5   15.32    1.25
  -7   1  -5   18.12    1.29
  -7   1  -5   15.03    1.29
  -7   1  -5   16.34    1.26
  -7   1  -5   15.21    1.67
  -7   1  -5   18.51    1.43
   7  -1   5   19.48    1.30
   7  -1   5   17.23    1.31
   7  -1   5   16.40    1.32
  -8   1  -5   28.18    2.16
  -8   1  -5   30.58    2.32
  -8   1  -5   32.14    2.17
  -8   1  -5   27.49    2.57
  -8   1  -5   29.66    2.14
   8  -1   5   28.13    2.17
   8  -1   5   31.52    2.17
  -9   1  -5   52.76    3.47
  -9   1  -5   45.23    3.51
  -9   1  -5   51.03    3.65
  -9   1  -5   49.23    3.51
  -9   1  -5   53.40    3.94
   9  -1   5   50.48    3.51
   9  -1   5   44.66    3.95
   9  -1   5   45.99    3.51
 -10   1  -5   53.48    3.95
 -10   1  -5   57.73    3.94
 -10   1  -5   60.87    4.34
 -10   1  -5   54.51    3.95
 -10   1  -5   49.85    4.08
 -10   1  -5   60.99    3.91
 -10   1  -5   59.53    3.93
  10  -1   5   56.61    4.44
  10  -1   5   52.44    3.97
  10  -1   5   56.64    3.98
  10  -1   5   48.87    3.95
 -11   1  -5    1.56    0.30
 -11   1  -5    1.62    0.26
 -11   1  -5    2.40    0.33
 -12   1  -5    3.58    0.42
 -12   1  -5    4.84    0.43
  12  -1   5    4.63    0.72
  -9   0   5   11.23    0.86
   8   0  -5    1.88    0.78
  -8   0   5    1.16    0.27
  -8   0   5    1.33    0.20
   7   0  -5   43.09    3.43
  -7   0   5   43.62    2.89
  -7   0   5   34.32    3.63
  -7   0   5   40.61    2.83
  -7   0   5   36.39    2.77
   6   0  -5   29.53    2.42
   6   0  -5   31.20    2.86
  -6   0   5   28.67    2.23
  -6   0   5   35.69    2.76
  -6   0   5   31.74    2.25
   5   0  -5   -0.54    0.57
   5   0  -5   -0.02    0.43
   5   0  -5    0.25    0.38
  -5   0   5   -0.29    0.24
  -5   0   5    0.02    0.57
  -5   0   5    0.13    0.19
   4   0  -5   40.64    2.73
  -4   0   5   34.05    2.61
  -4   0   5   35.43    2.61
  -4   0   5   36.59    2.63
  -4   0   5   39.65    2.91
  -3   0   5   12.53    1.15
  -3   0   5   10.49    0.82
  -3   0   5   10.81    0.80
  -3   0   5   10.56    0.80
  -2   0   5   44.25    3.30
  -2   0   5   52.06    3.47
  -2   0   5   46.15    3.30
   1   0  -5   19.82    1.44
  -1   0   5   18.77    1.36
   0   0  -5    3.22    0.37
   0   0   5    3.09    0.25
   0   0   5    2.76    0.25
   0   0   5    2.86    0.25
   1   0   5  102.64    7.23
  -2   0  -5    5.65    0.43
  -2   0  -5    5.22    0.42
   2   0   5    5.93    0.44
   2   0   5    6.37    0.65
  -3   0  -5  167.48   11.74
  -4   0  -5  130.28    9.19
  -5   0  -5    3.50    0.60
  -5   0  -5    3.30    0.50
  -5   0  -5    4.87    0.43
   5   0   5    3.67    0.39
   5   0   5    4.23    0.69
   5   0   5    4.14    0.39
  -6   0  -5   19.84    1.81
  -6   0  -5   22.30    1.62
   6   0   5   22.66    1.52
   6   0   5   17.79    1.76
   6   0   5   20.53    1.52
  -7   0  -5   90.76    6.32
  -7   0  -5   97.41    6.39
  -7   0  -5   91.96    6.31
  -7   0  -5   78.92    6.55
   7   0   5   87.73    6.31
   7   0   5   93.29    6.30
  -8   0  -5    5.64    0.85
  -8   0  -5    4.57    0.61
  -8   0  -5    5.09    0.53
  -8   0  -5    4.53    0.99
  -8   0  -5    4.39    0.49
   8   0   5    5.48    0.58
   8   0   5    5.38    0.59
   8   0   5    5.74    0.62
  -9   0  -5   41.69    3.35
  -9   0  -5   35.63    2.80
  -9   0  -5   42.31    2.81
  -9   0  -5   39.58    2.81
  -9   0  -5   33.94    2.93
  -9   0  -5   36.21    2.74
   9   0   5   38.96    2.80
   9   0   5   41.53    2.82
   9   0   5   38.61    2.80
   9   0   5   40.65    3.25
 -10   0  -5   66.87    5.11
 -10   0  -5   75.20    5.12
 -10   0  -5   71.21    5.10
 -10   0  -5   67.45    5.23
 -10   0  -5   80.82    5.11
 -10   0  -5   78.34    5.53
  10   0   5   72.74    5.12
  10   0   5   67.20    5.11
  10   0   5   70.81    5.13
  10   0   5   74.19    5.50
 -11   0  -5    7.71    0.72
 -11   0  -5    7.09    0.71
 -11   0  -5    8.29    0.72
  11   0   5    8.71    0.91
 -12   0  -5    5.06    0.50
 -12   0  -5    5.91    0.53
  12   0   5    6.82    0.74
  -8   1   5   38.24    2.99
  -8   1   5   43.63    2.95
  -8   1   5   45.45    2.97
   6  -1  -5    9.92    1.03
   6  -1  -5    9.13    1.17
  -6   1   5    9.01    1.33
  -6   1   5    9.64    0.80
  -6   1   5   11.02    0.86
   5  -1  -5   43.22    2.94
   5  -1  -5   35.72    2.86
   5  -1  -5   41.52    2.85
  -5   1   5   38.43    2.77
  -5   1   5   40.06    2.78
  -5   1   5   37.03    3.04
  -5   1   5   36.97    2.76
   4  -1  -5    0.60    0.37
   4  -1  -5   -0.22    0.35
   4  -1  -5    0.87    0.45
  -4   1   5   -0.22    0.47
  -4   1   5    0.25    0.17
  -4   1   5    0.37    0.21
  -4   1   5    0.21    0.12
  -3   1   5  102.47    7.13
  -3   1   5  102.81    7.12
   2  -1  -5   47.74    3.18
  -2   1   5   40.74    3.10
  -2   1   5   47.98    3.27
  -2   1   5   42.31    3.11
  -1   1   5  150.50   10.54
   0   1   5   31.80    2.45
   0   1   5   38.93    2.60
   1   1   5  150.55   10.53
  -3  -1  -5  176.84   12.41
  -4  -1  -5    0.25    0.19
  -4  -1  -5    0.19    0.10
  -4  -1  -5    0.15    0.10
  -4  -1  -5    0.12    0.29
  -4  -1  -5    0.54    0.22
   4   1   5    0.24    0.12
   4   1   5    0.32    0.20
   4   1   5    0.39    0.12
  -5  -1  -5   68.95    4.71
  -5  -1  -5   66.47    4.93
  -6  -1  -5   39.04    2.81
  -6  -1  -5   37.15    2.80
   6   1   5   39.89    3.01
   6   1   5   43.31    2.83
   6   1   5   40.77    2.84
  -7  -1  -5   29.75    2.07
  -7  -1  -5   22.95    2.35
  -7  -1  -5   26.04    1.98
   7   1   5   28.89    1.95
   7   1   5   26.29    1.96
   7   1   5   27.53    2.22
  -8  -1  -5    0.12    0.29
  -8  -1  -5    0.12    0.27
  -8  -1  -5    0.14    0.73
  -8  -1  -5    0.65    0.22
  -8  -1  -5    0.84    0.53
   8   1   5    0.49    0.26
   8   1   5    0.74    0.25
   8   1   5    0.10    0.58
   8   1   5    0.72    0.24
  -9  -1  -5  115.84    8.84
  -9  -1  -5  114.65    9.11
  -9  -1  -5  122.17    8.75
   9   1   5  128.88    9.02
   9   1   5  129.46    8.74
   9   1   5  139.49    8.76
 -10  -1  -5    1.19    0.37
 -10  -1  -5    0.39    0.73
 -10  -1  -5    0.84    0.59
 -10  -1  -5    1.76    0.32
  10   1   5    1.15    0.33
  10   1   5    1.31    0.37
  10   1   5    0.96    0.78
 -11  -1  -5   13.99    1.11
 -11  -1  -5   14.82    1.12
 -11  -1  -5   14.66    1.13
  11   1   5   13.63    1.21
 -12  -1  -5    1.42    0.29
 -12  -1  -5    2.08    0.27
   9  -2  -5    3.38    0.48
  -9   2   5    3.13    0.31
  -8   2   5    1.42    0.17
  -8   2   5    1.00    0.22
  -8   2   5    1.63    0.20
   7  -2  -5   24.38    1.74
  -7   2   5   19.94    1.59
   6  -2  -5    9.24    1.10
   6  -2  -5    8.63    0.99
   6  -2  -5   10.65    1.05
  -6   2   5   10.78    0.84
  -6   2   5    9.15    1.27
  -6   2   5   10.07    0.80
   5  -2  -5   21.84    1.85
   5  -2  -5   21.33    1.82
   5  -2  -5   24.79    1.78
  -5   2   5   22.84    1.69
  -5   2   5   23.97    1.68
  -5   2   5   22.44    1.99
   4  -2  -5   14.12    1.13
   4  -2  -5   12.80    1.21
  -4   2   5   14.15    1.05
  -4   2   5   14.31    1.05
  -4   2   5   12.86    1.36
   2  -2  -5   27.68    1.95
  -2   2   5   25.91    1.88
  -1   2   5   44.57    3.19
  -1   2   5   45.57    3.19
  -1   2   5   47.36    3.19
   0   2   5  134.03    9.40
  -1  -2  -5   78.67    5.05
   1   2   5   65.75    5.12
   2   2   5   55.19    3.97
  -3  -2  -5  178.00   12.53
  -4  -2  -5    5.79    0.52
  -4  -2  -5    6.05    0.46
  -4  -2  -5    5.65    0.46
  -4  -2  -5    4.61    0.78
   4   2   5    5.27    0.61
   4   2   5    5.34    0.45
   4   2   5    5.83    0.46
  -5  -2  -5   30.36    2.69
  -5  -2  -5   37.88    2.50
  -5  -2  -5   34.68    2.44
  -5  -2  -5   34.00    2.43
   5   2   5   35.46    2.44
   5   2   5   35.97    2.45
   5   2   5   32.82    2.57
  -6  -2  -5   46.43    3.35
  -6  -2  -5   47.49    3.36
  -6  -2  -5   51.81    3.44
   6   2   5   48.52    3.36
   6   2   5   48.03    3.37
   6   2   5   44.66    3.51
  -7  -2  -5   10.16    0.77
  -7  -2  -5    9.46    0.83
   7   2   5    9.95    0.77
   7   2   5    9.04    1.14
   7   2   5    8.73    0.78
   7   2   5   10.76    0.80
  -8  -2  -5   27.30    2.87
  -8  -2  -5   33.97    2.42
  -8  -2  -5   31.56    2.37
  -8  -2  -5   31.96    2.46
   8   2   5   34.79    2.66
   8   2   5   30.87    2.32
   8   2   5   34.15    2.33
   8   2   5   32.31    2.34
   8   2   5   33.65    2.56
  -9  -2  -5   15.53    1.55
  -9  -2  -5   17.70    2.20
  -9  -2  -5   18.68    1.42
   9   2   5   18.89    1.36
   9   2   5   16.30    1.33
   9   2   5   18.47    1.36
 -10  -2  -5   37.21    2.94
 -10  -2  -5   44.69    3.00
  10   2   5   40.84    2.96
  10   2   5   42.67    2.97
 -11  -2  -5    4.90    0.52
 -11  -2  -5    3.44    0.45
 -11  -2  -5    4.33    0.50
 -11  -2  -5    2.82    0.58
 -12  -2  -5    0.38    0.21
 -12  -2  -5    0.26    0.25
  12   2   5    0.85    0.43
   9  -3  -5    1.55    0.28
  -8   3   5    6.63    0.52
  -8   3   5    5.94    0.55
  -8   3   5    7.18    0.50
  -7   3   5   51.16    3.59
  -7   3   5   50.16    3.57
  -7   3   5   52.32    3.59
   6  -3  -5   10.09    1.15
   6  -3  -5   13.51    1.23
  -6   3   5   11.71    1.39
  -6   3   5   13.45    1.01
  -6   3   5   13.25    0.98
  -6   3   5   13.60    1.05
   5  -3  -5   14.85    1.41
   5  -3  -5   17.68    1.33
   5  -3  -5   14.42    1.39
  -5   3   5   15.83    1.56
  -5   3   5   17.47    1.25
  -5   3   5   16.04    1.19
   4  -3  -5   58.17    4.03
   4  -3  -5   60.72    4.03
  -4   3   5   56.25    4.17
  -4   3   5   59.05    4.01
  -4   3   5   50.58    3.97
   3  -3  -5    1.50    0.34
   3  -3  -5    2.50    0.38
   3  -3  -5    2.72    0.31
  -3   3   5    2.24    0.32
  -3   3   5    2.20    0.48
  -3   3   5    2.13    0.32
   2  -3  -5   13.54    0.98
  -2   3   5   11.85    0.96
  -2   3   5   15.34    1.19
   1  -3  -5   45.66    3.07
  -1   3   5   40.84    3.15
   0  -3  -5    2.98    0.31
   0  -3  -5    3.29    0.31
   0  -3  -5    2.83    0.37
   0  -3  -5    3.53    0.33
   0   3   5    2.88    0.46
  -1  -3  -5   71.51    4.88
   1   3   5   67.66    4.96
   2   3   5   32.96    2.46
   2   3   5   32.78    2.30
  -3  -3  -5    1.56    0.18
  -3  -3  -5    1.39    0.18
  -3  -3  -5    1.56    0.24
   3   3   5    1.31    0.18
   3   3   5    1.46    0.21
  -4  -3  -5   35.22    2.41
  -4  -3  -5   33.68    2.45
  -4  -3  -5   34.52    2.70
  -4  -3  -5   35.72    2.41
  -4  -3  -5   32.01    2.43
   4   3   5   32.55    2.40
   4   3   5   37.11    2.55
   4   3   5   33.57    2.41
  -5  -3  -5   70.36    4.64
  -5  -3  -5   58.46    4.92
  -5  -3  -5   72.13    4.69
   5   3   5   63.61    4.77
   5   3   5   62.92    4.63
   5   3   5   70.24    4.65
  -6  -3  -5   11.44    0.94
  -6  -3  -5   12.05    1.00
  -6  -3  -5   10.76    0.81
  -6  -3  -5   10.73    0.81
   6   3   5    9.12    1.03
   6   3   5   10.27    0.81
   6   3   5    8.73    0.78
  -7  -3  -5   -0.12    0.60
  -7  -3  -5    0.92    0.44
  -7  -3  -5    0.43    0.20
  -7  -3  -5    0.27    0.36
  -7  -3  -5    0.59    0.20
  -7  -3  -5    0.26    0.25
  -7  -3  -5    0.08    0.20
   7   3   5    0.19    0.43
   7   3   5    0.20    0.18
   7   3   5   -0.32    0.38
   7   3   5    0.28    0.18
  -8  -3  -5    0.59    0.39
  -8  -3  -5    0.74    0.88
  -8  -3  -5    1.32    0.53
  -8  -3  -5    0.97    0.24
  -8  -3  -5    0.86    0.30
  -8  -3  -5    0.90    0.30
   8   3   5    1.22    0.24
   8   3   5    1.23    0.52
   8   3   5    0.44    0.53
  -9  -3  -5    1.34    0.37
  -9  -3  -5    1.30    0.57
  -9  -3  -5    1.20    0.40
  -9  -3  -5    0.36    0.97
   9   3   5    2.38    0.63
   9   3   5    1.18    0.65
   9   3   5    1.37    0.26
  10   3   5  143.83   10.20
  10   3   5  145.04   10.37
 -11  -3  -5    9.96    0.90
 -12  -3  -5    0.60    0.22
 -12  -3  -5    1.08    0.24
  -8   4   5   19.62    1.26
  -8   4   5   15.96    1.27
   7  -4  -5   -0.12    0.38
  -7   4   5   -0.18    0.24
  -7   4   5    0.01    0.14
  -7   4   5    0.09    0.08
  -7   4   5    0.14    0.17
   6  -4  -5   -0.17    0.41
   6  -4  -5    0.18    0.55
   6  -4  -5   -0.18    0.51
  -6   4   5    0.24    0.27
  -6   4   5    0.49    0.19
  -6   4   5    0.32    0.10
  -6   4   5    0.20    0.11
  -6   4   5    0.15    0.51
   5  -4  -5    1.94    0.46
   5  -4  -5    0.42    0.45
   5  -4  -5    2.30    0.46
  -5   4   5    2.29    0.61
  -5   4   5    1.67    0.30
  -5   4   5    1.53    0.21
  -5   4   5    1.07    0.16
   4  -4  -5    0.87    0.33
   4  -4  -5    0.96    0.35
   4  -4  -5    1.24    0.39
  -4   4   5    1.12    0.49
  -4   4   5    1.04    0.25
  -4   4   5    1.07    0.19
  -4   4   5    1.18    0.20
  -4   4   5    1.47    0.27
   3  -4  -5   23.24    1.75
   3  -4  -5   22.71    1.81
   3  -4  -5   25.99    1.79
  -3   4   5   26.33    1.93
  -3   4   5   23.35    1.73
  -3   4   5   24.14    1.71
   2  -4  -5   32.12    2.24
  -2   4   5   27.68    2.22
  -2   4   5   34.93    2.36
   1  -4  -5   14.12    1.23
   1  -4  -5   17.43    1.19
   1  -4  -5   17.31    1.19
  -1   4   5   16.38    1.35
   0  -4  -5    6.64    0.64
   0  -4  -5    7.05    0.61
   0  -4  -5    8.06    0.59
   0  -4  -5    7.90    0.60
   0   4   5    8.02    0.82
  -1  -4  -5    8.62    0.67
  -1  -4  -5    9.42    0.74
  -1  -4  -5    8.26    0.72
  -1  -4  -5    8.65    0.66
   1   4   5    9.02    0.89
  -2  -4  -5   75.31    4.83
   2   4   5   61.60    4.88
  -3  -4  -5    1.69    0.30
  -3  -4  -5    1.54    0.33
  -3  -4  -5    1.66    0.21
  -3  -4  -5    1.45    0.20
   3   4   5    1.82    0.36
  -4  -4  -5    3.04    0.41
  -4  -4  -5    3.79    0.37
  -4  -4  -5    3.27    0.37
  -4  -4  -5    4.74    0.57
   4   4   5    3.46    0.60
  -5  -4  -5    4.60    0.53
  -5  -4  -5    3.53    0.63
  -5  -4  -5    5.63    0.68
  -5  -4  -5    4.90    0.47
  -5  -4  -5    5.25    0.47
   5   4   5    4.92    0.72
   5   4   5    4.42    0.43
  -6  -4  -5    9.47    0.96
  -6  -4  -5    9.52    0.76
  -6  -4  -5   10.27    0.88
  -6  -4  -5    9.68    0.77
   6   4   5    9.18    1.03
   6   4   5    8.43    0.72
   6   4   5    8.61    0.73
   6   4   5    8.81    0.93
  -7  -4  -5   14.23    1.22
  -7  -4  -5   13.80    1.06
  -7  -4  -5   14.57    1.08
  -7  -4  -5   12.92    1.25
   7   4   5   13.30    1.04
   7   4   5   12.09    1.26
   7   4   5   14.07    1.03
  -8  -4  -5   63.10    4.81
  -8  -4  -5   65.25    4.92
  -8  -4  -5   62.65    4.93
   8   4   5   73.14    4.79
   8   4   5   77.64    4.99
  -9  -4  -5   79.58    5.31
  -9  -4  -5   69.95    5.38
 -10  -4  -5   10.92    0.96
 -11  -4  -5   11.03    0.94
 -12  -4  -5    1.91    0.39
 -12  -4  -5    2.71    0.32
  -8   5   5    3.27    0.37
  -8   5   5    3.27    0.32
  -8   5   5    4.12    0.29
   7  -5  -5    2.55    0.43
  -7   5   5    2.94    0.32
  -7   5   5    1.93    0.28
  -7   5   5    2.33    0.42
  -7   5   5    2.63    0.24
   6  -5  -5    5.01    0.81
  -6   5   5    4.87    0.41
  -6   5   5    4.37    0.45
  -6   5   5    5.36    0.58
  -6   5   5    5.40    0.44
   5  -5  -5    0.18    0.40
   5  -5  -5    0.00    0.40
   5  -5  -5    0.09    0.34
  -5   5   5    0.49    0.17
  -5   5   5    0.25    0.27
  -5   5   5    0.36    0.14
  -5   5   5    0.60    0.48
  -5   5   5    0.36    0.11
   4  -5  -5   20.71    1.69
   4  -5  -5   21.95    1.62
  -4   5   5   21.74    1.52
  -4   5   5   20.29    1.51
  -4   5   5   23.92    1.78
  -4   5   5   19.87    1.58
   3  -5  -5   14.73    1.21
   3  -5  -5   16.39    1.26
   3  -5  -5   14.79    1.29
  -3   5   5   15.87    1.23
  -3   5   5   17.95    1.42
  -3   5   5   17.90    1.18
  -3   5   5   17.41    1.18
  -3   5   5   14.67    1.16
   2  -5  -5   27.93    2.06
   2  -5  -5   29.53    2.06
  -2   5   5   26.61    2.01
  -2   5   5   30.70    2.04
   1  -5  -5    3.58    0.50
   1  -5  -5    3.82    0.43
   1  -5  -5    4.14    0.42
  -1   5   5    4.25    0.37
  -1   5   5    3.52    0.65
  -1   5   5    3.42    0.39
   0  -5  -5    2.89    0.41
   0  -5  -5    2.23    0.30
   0  -5  -5    2.34    0.27
   0  -5  -5    2.24    0.28
   0   5   5    2.14    0.43
  -1  -5  -5   -0.01    0.14
  -1  -5  -5    0.39    0.20
  -1  -5  -5    0.33    0.21
  -1  -5  -5    0.02    0.16
   1   5   5   -0.24    0.32
  -2  -5  -5   31.20    2.39
  -2  -5  -5   34.25    2.37
  -2  -5  -5   31.60    2.31
  -2  -5  -5   33.97    2.30
   2   5   5   31.79    2.45
  -3  -5  -5   31.22    2.23
  -3  -5  -5   30.25    2.24
  -3  -5  -5   33.19    2.31
  -4  -5  -5   80.24    5.50
  -4  -5  -5   80.20    5.45
   4   5   5   73.60    5.61
  -5  -5  -5   68.35    4.78
  -5  -5  -5   70.05    4.78
  -5  -5  -5   64.80    4.83
  -5  -5  -5   66.92    4.78
  -5  -5  -5   68.99    4.91
   5   5   5   67.99    4.96
   5   5   5   70.16    4.86
  -6  -5  -5    8.42    0.74
  -6  -5  -5    7.85    0.73
  -6  -5  -5    9.09    0.77
  -6  -5  -5    7.94    0.84
  -6  -5  -5    7.36    0.94
   6   5   5    7.76    1.06
   6   5   5    7.99    0.89
  -7  -5  -5    1.32    0.31
  -7  -5  -5    1.18    0.34
  -7  -5  -5    0.74    0.44
  -7  -5  -5    0.98    0.29
  -7  -5  -5    1.04    0.45
   7   5   5    0.74    0.54
   7   5   5    0.57    0.41
  -8  -5  -5   51.32    3.83
  -8  -5  -5   54.93    3.98
  -8  -5  -5   55.60    3.83
  -9  -5  -5    0.50    0.43
  -9  -5  -5    0.31    0.27
  -9  -5  -5    0.32    0.34
  -9  -5  -5   -0.11    0.54
   9   5   5    0.61    0.70
 -10  -5  -5   49.61    3.43
 -10  -5  -5   47.60    3.47
 -11  -5  -5    0.04    0.23
 -12  -5  -5    6.16    0.53
  12   5   5    7.32    0.77
  -7   6   5   11.18    0.89
  -7   6   5   12.83    0.96
  -7   6   5   12.79    0.88
   6  -6  -5    8.52    0.90
  -6   6   5    7.49    0.59
  -6   6   5    7.26    0.62
  -6   6   5    7.59    0.72
  -6   6   5    8.93    0.61
   5  -6  -5    0.23    0.39
  -5   6   5    0.48    0.12
  -5   6   5    0.59    0.18
  -5   6   5    0.71    0.19
  -5   6   5    0.73    0.15
  -5   6   5    0.59    0.28
   4  -6  -5   36.87    2.75
   4  -6  -5   36.82    2.81
  -4   6   5   38.32    2.67
  -4   6   5   39.84    2.67
   3  -6  -5    4.95    0.72
   3  -6  -5    6.02    0.68
  -3   6   5    6.11    0.51
  -3   6   5    7.28    0.53
  -3   6   5    7.47    0.84
   2  -6  -5   44.51    3.49
  -2   6   5   51.06    3.57
  -2   6   5   44.47    3.44
  -2   6   5   52.23    3.46
  -2   6   5   52.84    3.45
  -2   6   5   51.17    3.45
   1  -6  -5    0.82    0.27
   1  -6  -5    0.27    0.23
   1  -6  -5    0.46    0.25
  -1   6   5    0.37    0.13
  -1   6   5    0.08    0.12
  -1   6   5    0.31    0.17
  -1   6   5    0.36    0.33
   0  -6  -5   68.67    4.65
   0  -6  -5   62.64    4.65
   0   6   5   61.47    4.58
   0   6   5   73.90    4.61
   0   6   5   63.40    4.58
   0   6   5   65.65    4.58
  -1  -6  -5    4.20    0.55
  -1  -6  -5    3.30    0.48
  -1  -6  -5    3.46    0.41
   1   6   5    4.01    0.39
   1   6   5    3.70    0.53
   1   6   5    3.91    0.42
  -2  -6  -5   33.98    2.75
  -2  -6  -5   34.74    2.67
  -2  -6  -5   38.31    2.66
  -2  -6  -5   40.27    2.76
   2   6   5   40.28    2.65
   2   6   5   38.06    2.81
  -3  -6  -5    1.36    0.24
  -3  -6  -5    1.04    0.40
  -3  -6  -5    0.66    0.36
   3   6   5    1.05    0.15
   3   6   5    0.73    0.26
  -4  -6  -5  169.53   12.18
   4   6   5  182.92   12.19
   4   6   5  152.85   12.21
   4   6   5  187.79   12.09
  -5  -6  -5   10.24    0.86
  -5  -6  -5    9.84    1.08
  -5  -6  -5    8.69    0.88
  -5  -6  -5   11.47    0.87
  -5  -6  -5    9.91    1.12
   5   6   5    9.90    0.95
   5   6   5    8.66    1.20
   5   6   5   11.68    1.04
  -6  -6  -5   36.19    2.69
  -6  -6  -5   35.78    2.51
  -6  -6  -5   33.72    2.62
  -6  -6  -5   35.99    2.50
  -6  -6  -5   34.86    2.51
   6   6   5   35.89    2.59
   6   6   5   33.68    2.80
   6   6   5   31.24    2.61
  -7  -6  -5   19.29    1.71
  -7  -6  -5   21.12    1.53
  -7  -6  -5   20.20    1.55
  -7  -6  -5   18.88    1.51
   7   6   5   19.33    1.62
   7   6   5   20.53    1.94
  -8  -6  -5   19.84    1.74
  -8  -6  -5   23.31    1.75
  -8  -6  -5   24.96    1.77
  -8  -6  -5   24.40    1.95
   8   6   5   24.30    1.86
  -9  -6  -5    5.44    0.73
   9   6   5    7.72    0.86
 -10  -6  -5   64.96    4.31
 -10  -6  -5   57.82    4.33
  11   6   5   19.60    1.55
   7  -7  -5    0.56    0.26
  -7   7   5    0.54    0.19
  -7   7   5    0.51    0.08
  -7   7   5    0.40    0.11
  -6   7   5   16.06    1.04
  -6   7   5   14.24    1.04
  -6   7   5   13.09    1.05
   5  -7  -5    2.58    0.46
  -5   7   5    2.56    0.46
  -5   7   5    3.00    0.28
  -5   7   5    3.55    0.38
  -5   7   5    2.91    0.32
   4  -7  -5    3.55    0.51
  -4   7   5    4.20    0.38
  -4   7   5    3.90    0.35
  -4   7   5    3.55    0.51
   3  -7  -5   17.34    1.49
  -3   7   5   20.29    1.41
  -3   7   5   19.90    1.43
  -3   7   5   20.98    1.43
   2  -7  -5    3.79    0.49
  -2   7   5    4.87    0.41
  -2   7   5    4.37    0.53
  -2   7   5    5.29    0.49
  -2   7   5    5.85    0.48
  -1   7   5    0.81    0.16
  -1   7   5    0.86    0.16
  -1   7   5    0.89    0.19
  -1   7   5    0.90    0.36
  -1   7   5    0.52    0.15
  -1   7   5    0.65    0.13
   0  -7  -5    8.40    0.78
   0  -7  -5    7.18    0.68
   0  -7  -5    9.51    0.70
   0   7   5    8.16    0.84
   0   7   5    8.64    0.65
   0   7   5    8.46    0.61
   0   7   5    7.45    0.64
   0   7   5    7.16    0.60
   0   7   5    8.00    0.65
  -1  -7  -5    4.85    0.51
  -1  -7  -5    5.31    0.61
  -1  -7  -5    5.00    0.51
  -1  -7  -5    4.73    0.66
   1   7   5    5.25    0.48
   1   7   5    4.78    0.45
   1   7   5    5.22    0.40
   1   7   5    4.60    0.70
  -2  -7  -5    2.81    0.36
  -2  -7  -5    2.85    0.52
  -2  -7  -5    2.85    0.46
   2   7   5    3.14    0.27
   2   7   5    3.17    0.41
   2   7   5    3.21    0.38
   2   7   5    2.79    0.52
  -3  -7  -5    0.83    0.27
  -3  -7  -5    0.29    0.36
  -3  -7  -5    0.25    0.47
   3   7   5    0.69    0.12
   3   7   5    0.25    0.41
   3   7   5    1.19    0.49
   3   7   5    0.49    0.25
   3   7   5    0.63    0.17
  -4  -7  -5   75.63    5.76
  -4  -7  -5   87.03    5.94
   4   7   5   82.46    5.77
   4   7   5   84.62    5.94
  -5  -7  -5    2.68    0.40
  -5  -7  -5    2.21    0.36
  -5  -7  -5    1.78    0.38
  -5  -7  -5    1.31    0.57
  -5  -7  -5    1.75    0.51
   5   7   5    1.86    0.49
  -6  -7  -5  138.90    9.70
  -6  -7  -5  139.63    9.53
  -6  -7  -5  141.68    9.60
  -6  -7  -5  120.87    9.51
  -6  -7  -5  138.90    9.53
   6   7   5  135.40    9.79
   6   7   5  141.68    9.57
  -7  -7  -5    2.34    0.57
  -7  -7  -5    1.42    0.50
  -7  -7  -5    1.66    0.38
  -7  -7  -5    1.46    0.32
  -7  -7  -5    1.80    0.36
   7   7   5    1.45    0.42
   7   7   5    1.12    0.21
   7   7   5    0.71    0.65
  -8  -7  -5    0.62    0.43
  -8  -7  -5    0.96    0.36
   8   7   5    0.76    0.38
   8   7   5    1.21    0.28
   8   7   5    0.66    0.20
  -9  -7  -5    9.34    0.91
   9   7   5   10.64    0.97
  10   7   5    4.77    0.67
  10   7   5    4.90    0.49
 -11  -7  -5    3.73    0.36
   6  -8  -5    3.83    0.51
  -6   8   5    4.57    0.33
  -6   8   5    3.79    0.34
   5  -8  -5    0.31    0.29
  -5   8   5    0.38    0.26
  -5   8   5    0.59    0.13
  -5   8   5    0.31    0.14
  -5   8   5    0.44    0.11
   4  -8  -5    1.15    0.36
  -4   8   5    1.38    0.20
  -4   8   5    1.03    0.28
  -4   8   5    1.62    0.21
  -4   8   5    1.10    0.17
  -3   8   5    5.71    0.48
  -3   8   5    5.92    0.55
  -3   8   5    6.65    0.54
  -3   8   5    6.02    0.50
   2  -8  -5   16.24    1.23
   2  -8  -5   15.17    1.27
  -2   8   5   17.79    1.22
  -2   8   5   17.85    1.21
  -2   8   5   15.59    1.28
  -1   8   5    5.97    0.63
  -1   8   5    6.09    0.56
  -1   8   5    6.30    0.58
  -1   8   5    7.01    0.52
  -1   8   5    6.54    0.53
   0  -8  -5   42.20    3.30
   0  -8  -5   45.45    3.38
   0   8   5   48.13    3.27
   0   8   5   52.48    3.33
   0   8   5   47.71    3.27
   0   8   5   44.74    3.26
  -1  -8  -5   21.03    1.56
  -1  -8  -5   23.69    1.56
  -1  -8  -5   18.65    1.66
   1   8   5   20.20    1.49
   1   8   5   20.74    1.50
   1   8   5   21.89    1.51
  -2  -8  -5    0.70    0.35
  -2  -8  -5   -0.01    0.43
  -2  -8  -5    0.25    0.25
   2   8   5    0.68    0.54
   2   8   5    0.45    0.20
   2   8   5    0.39    0.14
   2   8   5    0.52    0.36
   2   8   5    0.72    0.13
  -3  -8  -5    5.08    0.73
  -3  -8  -5    4.86    0.53
  -3  -8  -5    5.86    0.77
  -3  -8  -5    4.07    0.53
  -3  -8  -5    3.09    0.59
   3   8   5    4.19    0.58
   3   8   5    3.66    0.35
   3   8   5    4.15    0.44
   3   8   5    3.98    0.73
   3   8   5    3.99    0.46
  -4  -8  -5    0.72    0.29
  -4  -8  -5    1.33    0.34
  -4  -8  -5    0.40    0.44
  -4  -8  -5    0.50    0.57
  -4  -8  -5    0.47    0.36
   4   8   5    0.47    0.27
   4   8   5    0.18    0.53
   4   8   5    0.45    0.17
   4   8   5    0.50    0.12
   4   8   5    0.16    0.43
  -5  -8  -5   95.35    6.31
  -5  -8  -5   89.31    6.31
   5   8   5   93.63    6.30
   5   8   5   81.72    6.26
  -6  -8  -5    1.56    0.36
  -6  -8  -5    1.39    0.33
  -6  -8  -5    0.89    0.53
  -6  -8  -5    1.73    0.40
  -6  -8  -5    1.38    0.54
   6   8   5    0.90    0.18
   6   8   5    1.43    0.38
  -7  -8  -5    3.79    0.61
   7   8   5    3.02    0.55
   7   8   5    3.16    0.34
  -8  -8  -5    7.57    0.75
   8   8   5    7.36    0.78
   8   8   5    6.68    0.59
  -9  -8  -5    3.11    0.53
   9   8   5    3.38    0.39
   9   8   5    3.98    0.58
   5  -9  -5    0.27    0.18
  -5   9   5    0.45    0.11
  -5   9   5    0.43    0.10
  -5   9   5    0.32    0.19
  -5   9   5    0.47    0.09
   4  -9  -5    1.52    0.30
  -4   9   5    1.25    0.28
  -4   9   5    1.76    0.30
  -4   9   5    1.96    0.22
  -4   9   5    1.74    0.22
   3  -9  -5    0.85    0.29
  -3   9   5    1.76    0.32
  -3   9   5    1.14    0.17
  -3   9   5    1.48    0.19
  -2   9   5   28.24    1.90
  -2   9   5   26.36    1.90
  -2   9   5   28.72    1.91
  -2   9   5   24.30    1.90
  -1   9   5    0.50    0.17
  -1   9   5    0.75    0.16
  -1   9   5    0.68    0.17
  -1   9   5    0.86    0.28
   0   9   5    0.27    0.14
   0   9   5    0.09    0.16
   0   9   5    0.03    0.48
   0   9   5    0.22    0.25
   0   9   5   -0.14    0.15
   0   9   5    0.24    0.15
  -1  -9  -5    0.31    0.32
   1   9   5    0.12    0.51
   1   9   5    0.29    0.14
   1   9   5    0.51    0.14
   1   9   5    0.25    0.16
   1   9   5    0.58    0.25
  -2  -9  -5   -0.71    0.41
  -2  -9  -5    0.10    0.25
  -2  -9  -5   -0.35    0.24
   2   9   5    0.44    0.23
   2   9   5    0.20    0.16
   2   9   5    0.17    0.14
   2   9   5   -0.40    0.53
  -3  -9  -5    3.69    0.69
  -3  -9  -5    4.93    0.67
   3   9   5    3.66    0.41
   3   9   5    4.42    0.45
   3   9   5    3.78    0.34
   3   9   5    2.44    0.71
  -4  -9  -5   48.05    3.45
   4   9   5   51.20    3.38
   4   9   5   45.00    3.66
  -5  -9  -5   16.19    1.35
   5   9   5   19.26    1.44
   5   9   5   16.08    1.22
  -6  -9  -5    9.42    0.97
   6   9   5   12.07    0.93
   6   9   5   12.79    1.40
  -7  -9  -5    3.62    0.56
   7   9   5    4.24    0.46
   7   9   5    2.75    0.51
  -8  -9  -5   14.62    1.18
   8   9   5   16.08    1.11
   9   9   5   29.09    2.17
   9   9   5   31.60    2.13
  -4  10   5    0.25    0.18
  -4  10   5    0.08    0.09
  -4  10   5    0.10    0.07
  -3  10   5   31.57    2.14
  -3  10   5   31.20    2.14
  -3  10   5   28.78    2.13
   2 -10  -5   -0.08    0.19
  -2  10   5    0.13    0.13
  -2  10   5    0.44    0.25
  -2  10   5    0.12    0.14
  -1  10   5    1.52    0.18
  -1  10   5    1.59    0.28
  -1  10   5    0.93    0.18
  -1  10   5    1.23    0.18
   0  10   5    1.26    0.19
   0  10   5    1.38    0.19
   1  10   5   -0.17    0.50
   1  10   5    0.29    0.16
   1  10   5    0.38    0.15
   2  10   5    0.22    0.14
   2  10   5    0.21    0.16
   2  10   5   -0.41    0.53
   3  10   5   10.62    0.82
   3  10   5   12.18    0.86
   3  10   5   11.10    0.85
   4  10   5    6.35    0.52
   4  10   5    7.26    0.56
   5  10   5   17.20    1.25
   6  10   5    3.35    0.31
   7  10   5   29.76    2.09
  -8 -10  -5    0.61    0.21
  -3  11   5    4.00    0.31
  -2  11   5    0.83    0.14
  -2  11   5    1.27    0.22
  -2  11   5    1.01    0.13
  -1  11   5   14.71    0.96
  -1  11   5   12.19    0.96
  -1  11   5   12.87    1.01
   0  11   5    0.08    0.11
   0  11   5    0.26    0.20
   1  11   5    1.29    0.46
   1  11   5    1.54    0.18
   1  11   5    1.76    0.19
   2  11   5    0.06    0.13
   2  11   5   -0.55    0.43
   2  11   5    0.23    0.13
   3  11   5    9.26    0.71
   3  11   5    8.80    0.68
   3  11   5    9.86    0.71
  -4 -11  -5    0.22    0.22
   4  11   5    0.23    0.12
   4  11   5   -0.55    0.40
   4  11   5    0.25    0.11
   4  11   5    0.17    0.13
  -5 -11  -5   18.26    1.35
   5  11   5   18.98    1.51
  -6 -11  -5    0.75    0.21
   6  11   5    1.06    0.17
   7  11   5    8.22    0.60
   0  12   5    4.26    0.39
   0  12   5    5.42    0.38
   1  12   5    6.60    0.51
   2  12   5    0.72    0.10
   2  12   5    0.93    0.13
   3  12   5    4.71    0.40
   3  12   5    4.77    0.37
   4  12   5    5.10    0.61
   5  12   5    4.36    0.34
  -1  12  -6    3.75    0.44
   2  11  -6    9.37    1.28
   2  11  -6   11.25    0.97
   2  11  -6   12.69    1.09
   1  11  -6    0.00    0.32
   1  11  -6   -0.07    0.57
   0  11  -6    2.57    0.66
   0  11  -6    2.70    0.43
  -1  11  -6    8.26    0.80
  -1  11  -6    8.83    0.79
  -2  11  -6    7.17    0.70
  -2  11  -6    7.17    0.72
  -2  11  -6    9.66    1.13
  -3  11  -6    1.13    0.29
  -3  11  -6    0.97    0.25
  -3  11  -6    1.65    0.60
  -4  11  -6    3.61    0.38
  -4  11  -6    3.16    0.44
  -5  11  -6    2.28    0.29
   4  10  -6    7.68    0.71
  -4 -10   6    6.49    0.58
   3  10  -6    4.94    0.67
   3  10  -6    6.15    1.10
   2  10  -6    0.04    0.63
   2  10  -6    0.42    0.33
   2  10  -6    0.10    0.39
   2  10  -6    0.72    0.46
   1  10  -6    3.34    0.55
   1  10  -6    4.08    0.78
   1  10  -6    4.17    0.65
   0  10  -6    8.56    0.88
   0  10  -6   10.79    1.23
   0  10  -6    7.80    0.88
   0  10  -6    9.20    0.69
  -1  10  -6    1.74    0.24
  -1  10  -6    2.10    0.40
  -1  10  -6    1.92    0.38
  -1  10  -6    1.74    0.63
  -1  10  -6    1.98    0.45
  -1  10  -6    1.49    0.36
  -2  10  -6    0.42    0.27
  -2  10  -6    0.34    0.25
  -2  10  -6    0.20    0.25
  -2  10  -6    0.76    0.21
  -2  10  -6    0.44    0.57
  -3  10  -6   -0.08    0.60
  -3  10  -6    0.36    0.24
  -3  10  -6    0.10    0.27
  -3  10  -6    0.32    0.20
  -3  10  -6    0.21    0.23
  -3  10  -6    0.69    0.28
  -4  10  -6    6.58    0.58
  -4  10  -6    4.95    0.61
  -4  10  -6    6.42    0.63
  -4  10  -6    5.49    0.59
  -4  10  -6    7.05    0.62
  -5  10  -6    0.39    0.17
  -5  10  -6    0.50    0.21
  -5  10  -6    0.44    0.20
  -5  10  -6   -0.12    0.62
  -5  10  -6    0.44    0.25
  -5  10  -6    0.69    0.19
  -6  10  -6    3.18    0.39
  -6  10  -6    3.14    0.32
  -6  10  -6    1.98    0.33
  -6  10  -6    2.71    0.32
  -7  10  -6    0.51    0.14
  -7  10  -6    0.40    0.13
  -7  10  -6    0.56    0.14
  -7  10  -6    0.33    0.13
   5   9  -6    0.77    0.43
   5   9  -6    1.64    0.35
  -5  -9   6    2.16    0.38
   4   9  -6    3.96    0.64
   4   9  -6    3.09    0.32
   3   9  -6    9.66    0.94
   3   9  -6    9.63    1.48
   3   9  -6    6.59    0.97
   3   9  -6    8.28    1.30
  -3  -9   6    9.29    0.80
   2   9  -6    3.35    0.62
   2   9  -6    4.35    0.72
   2   9  -6    2.44    0.55
   2   9  -6    3.50    0.78
   2   9  -6    3.61    0.56
  -2  -9   6    3.35    0.50
   1   9  -6    3.44    0.57
   1   9  -6    3.08    0.36
   1   9  -6    2.99    0.44
   1   9  -6    2.88    0.53
   1   9  -6    3.94    0.60
   1   9  -6    3.79    0.75
   0   9  -6   16.00    1.08
   0   9  -6   13.49    1.24
   0   9  -6   13.86    1.22
   0   9  -6   13.66    1.48
  -1   9  -6   32.16    2.51
  -1   9  -6   34.88    2.71
  -1   9  -6   37.21    2.40
  -1   9  -6   30.83    2.52
  -2   9  -6   14.64    1.17
  -2   9  -6   13.13    1.17
  -2   9  -6   13.97    1.19
  -2   9  -6   14.36    1.45
  -2   9  -6   14.43    1.18
  -2   9  -6   14.06    1.19
  -3   9  -6   27.13    1.95
  -3   9  -6   24.64    1.94
  -3   9  -6   26.79    1.94
  -3   9  -6   26.07    1.98
  -3   9  -6   25.34    1.96
  -4   9  -6    5.26    0.57
  -4   9  -6    6.69    0.64
  -4   9  -6    5.69    0.58
  -4   9  -6    5.46    0.64
  -5   9  -6    0.43    0.23
  -5   9  -6    0.06    0.66
  -5   9  -6    0.51    0.20
  -5   9  -6    0.33    0.20
  -5   9  -6    0.44    0.24
  -5   9  -6    0.00    0.23
  -5   9  -6    0.15    0.32
  -5   9  -6    0.34    0.20
  -6   9  -6    2.88    0.41
  -6   9  -6    2.40    0.43
  -6   9  -6    3.71    0.38
  -6   9  -6    2.92    0.41
  -6   9  -6    3.20    0.35
  -7   9  -6    0.15    0.17
  -7   9  -6    0.04    0.24
  -7   9  -6    0.06    0.30
  -7   9  -6    0.09    0.14
  -7   9  -6    0.14    0.20
  -7   9  -6   -0.01    0.12
  -8   9  -6   13.23    1.03
  -8   9  -6   15.65    1.04
  -8   9  -6   13.56    1.04
   6   8  -6   25.13    1.82
  -6  -8   6   22.50    1.70
   5   8  -6    9.72    1.14
   5   8  -6   10.48    1.01
   5   8  -6   13.53    1.12
  -5  -8   6   12.79    0.96
   4   8  -6   69.81    4.65
   4   8  -6   62.80    4.95
   4   8  -6   61.59    4.71
   4   8  -6   69.77    4.91
  -4  -8   6   66.44    4.66
   3   8  -6   15.00    1.82
   3   8  -6   15.83    1.32
   3   8  -6   13.06    1.37
   3   8  -6   16.80    1.69
   3   8  -6   15.25    1.28
  -3  -8   6   15.77    1.24
   2   8  -6    8.22    0.89
   2   8  -6    6.71    0.88
   2   8  -6    8.39    1.19
   2   8  -6    7.79    0.86
  -2  -8   6    6.81    0.78
  -2  -8   6    7.92    0.79
   1   8  -6    2.47    0.43
   1   8  -6    2.22    0.47
   1   8  -6    2.70    0.64
   1   8  -6    1.80    0.43
  -1  -8   6    2.93    0.43
   0   8  -6    0.82    0.32
   0   8  -6    0.46    0.52
   0   8  -6    0.57    0.36
   0   8  -6    0.45    0.33
   0   8  -6    0.38    0.20
   0   8  -6    0.28    0.29
   0  -8   6    0.58    0.31
  -1   8  -6  103.27    7.39
  -1   8  -6  118.96    7.31
  -1   8  -6  100.55    7.44
  -1   8  -6   97.98    7.43
  -1   8  -6  109.78    7.54
  -1   8  -6  101.46    7.41
   1  -8   6  103.33    7.35
  -2   8  -6    1.56    0.35
  -2   8  -6    1.65    0.34
  -2   8  -6    1.63    0.34
  -2   8  -6    1.49    0.31
  -2   8  -6    2.03    0.38
  -2   8  -6    2.31    0.61
  -2   8  -6    2.27    0.28
   2  -8   6    1.95    0.37
  -3   8  -6   24.28    1.68
  -3   8  -6   23.15    1.68
  -3   8  -6   20.17    1.62
  -3   8  -6   23.59    1.70
  -3   8  -6   22.27    1.67
  -3   8  -6   22.19    1.70
   3  -8   6   19.60    1.65
  -4   8  -6   21.48    1.66
  -4   8  -6   19.10    1.98
  -4   8  -6   23.16    1.69
  -4   8  -6   21.80    1.71
  -4   8  -6   24.36    1.73
  -4   8  -6   23.65    1.70
  -4   8  -6   23.64    1.67
  -4   8  -6   22.41    1.68
  -5   8  -6    3.21    0.47
  -5   8  -6    3.14    0.47
  -5   8  -6    2.65    0.36
  -5   8  -6    3.15    0.67
  -5   8  -6    4.37    0.81
  -5   8  -6    3.40    0.48
  -5   8  -6    2.26    0.49
  -5   8  -6    2.55    0.44
  -5   8  -6    2.83    0.42
  -6   8  -6    6.55    0.61
  -6   8  -6    5.45    0.58
  -6   8  -6    6.84    0.59
  -6   8  -6    7.22    0.62
  -6   8  -6    4.90    0.79
  -6   8  -6    5.39    0.53
  -7   8  -6    5.93    0.51
  -7   8  -6    5.90    0.58
  -7   8  -6    5.96    0.56
  -7   8  -6    6.34    0.59
  -8   8  -6   21.26    1.60
  -8   8  -6   22.31    1.59
  -8   8  -6   22.65    1.60
  -9   8  -6    8.38    0.70
  -9   8  -6    9.59    0.67
  -9   8  -6    8.55    0.69
  -7  -7   6    2.12    0.31
   6   7  -6   10.00    0.98
   6   7  -6    7.22    1.00
   5   7  -6   73.40    4.76
   5   7  -6   58.94    4.85
   5   7  -6   70.45    4.85
  -5  -7   6   67.76    4.75
   4   7  -6   11.36    1.13
   4   7  -6    8.26    1.69
   4   7  -6   10.87    1.44
   4   7  -6   11.24    1.13
  -4  -7   6   12.16    0.99
   3   7  -6   16.93    1.41
   3   7  -6   16.45    1.37
   3   7  -6   16.49    1.45
   3   7  -6   14.26    1.77
   3   7  -6   17.21    1.68
  -3  -7   6   14.64    1.30
  -3  -7   6   17.77    1.32
  -3  -7   6   18.81    1.32
  -3  -7   6   16.03    1.34
   2   7  -6   27.53    2.20
   2   7  -6   29.31    2.50
   2   7  -6   27.89    2.25
  -2  -7   6   31.79    2.14
  -2  -7   6   31.64    2.14
  -2  -7   6   27.44    2.16
   1   7  -6    1.03    0.29
   1   7  -6    0.42    0.32
   1   7  -6    0.79    0.34
   1   7  -6    0.66    0.50
   1   7  -6    0.32    0.28
  -1  -7   6    1.18    0.32
   0   7  -6   13.52    1.62
   0   7  -6   14.09    1.13
   0   7  -6   11.65    1.11
   0   7  -6   13.30    1.32
   0   7  -6   14.64    1.15
   0  -7   6   12.35    1.06
  -1   7  -6    5.22    0.83
  -1   7  -6    3.76    0.43
  -1   7  -6    3.89    0.55
  -1   7  -6    5.53    0.68
  -1   7  -6    5.63    0.61
  -1   7  -6    4.58    0.56
  -1   7  -6    4.23    0.56
  -1   7  -6    4.05    0.53
  -1   7  -6    5.05    0.65
   1  -7   6    4.90    0.57
  -2   7  -6   11.35    0.94
  -2   7  -6   13.20    1.03
  -2   7  -6   11.90    1.02
  -2   7  -6   13.09    0.93
  -2   7  -6   12.18    1.00
  -2   7  -6   11.81    1.03
  -2   7  -6   12.14    1.05
  -2   7  -6   14.15    1.27
   2  -7   6   11.65    1.01
  -3   7  -6   16.00    1.37
  -3   7  -6   17.58    1.36
  -3   7  -6   17.74    1.34
  -3   7  -6   20.43    1.33
  -3   7  -6   18.16    1.35
  -3   7  -6   16.80    1.73
  -3   7  -6   16.45    1.39
  -3   7  -6   17.95    1.31
  -3   7  -6   17.25    1.37
   3  -7   6   16.58    1.37
  -4   7  -6   80.22    6.26
  -4   7  -6   87.19    6.26
  -4   7  -6   93.78    6.54
  -4   7  -6   83.83    6.29
  -4   7  -6   97.71    6.24
  -4   7  -6   89.20    6.24
  -4   7  -6   86.75    6.29
  -4   7  -6   84.49    6.31
  -4   7  -6  100.71    6.27
  -5   7  -6   21.26    1.63
  -5   7  -6   21.02    1.67
  -5   7  -6   22.65    1.68
  -5   7  -6   19.28    1.63
  -5   7  -6   24.86    1.65
  -5   7  -6   21.59    1.94
  -5   7  -6   24.82    1.65
  -6   7  -6    0.49    0.24
  -6   7  -6    0.69    0.27
  -6   7  -6    0.06    0.42
  -6   7  -6    0.47    0.29
  -6   7  -6    0.14    0.20
  -6   7  -6    0.61    0.63
  -6   7  -6    0.00    0.46
  -6   7  -6    0.38    0.21
  -6   7  -6    0.24    0.17
  -7   7  -6   11.52    0.89
  -7   7  -6   10.92    0.89
  -7   7  -6    9.61    0.82
  -7   7  -6    9.41    1.05
  -7   7  -6    9.82    0.85
  -7   7  -6   11.84    0.87
  -8   7  -6    0.72    0.27
  -8   7  -6    0.27    0.22
  -8   7  -6    0.34    0.17
  -8   7  -6    0.19    0.39
  -8   7  -6    0.12    0.14
  -8   7  -6    0.57    0.25
  -8   7  -6    0.26    0.18
  -9   7  -6    8.70    0.70
  -9   7  -6    8.34    0.70
  -9   7  -6    7.78    0.81
  -9   7  -6    8.56    0.65
 -10   7  -6    0.18    0.11
 -10   7  -6    0.28    0.15
 -10   7  -6    0.31    0.11
 -10   7  -6    0.22    0.16
   7   6  -6    6.13    1.09
  -7  -6   6    6.55    0.56
   6   6  -6    9.52    1.10
   6   6  -6    7.95    0.88
   6   6  -6    6.59    1.06
  -6  -6   6    9.02    0.73
   5   6  -6    3.62    0.77
   5   6  -6    3.69    0.38
   5   6  -6    2.62    0.87
   4   6  -6    8.50    1.21
   4   6  -6    8.26    0.92
  -4  -6   6    8.39    0.79
  -4  -6   6    7.21    0.76
  -4  -6   6    7.93    0.80
  -4  -6   6    8.01    0.83
   3   6  -6  107.83    8.12
   3   6  -6  102.28    8.02
  -3  -6   6  111.46    7.92
  -3  -6   6  125.73    7.91
  -3  -6   6  120.98    7.91
  -3  -6   6  110.28    7.91
   2   6  -6    0.29    0.31
   2   6  -6    0.58    0.48
   2   6  -6    0.18    0.27
   2   6  -6    0.00    0.50
  -2  -6   6    0.71    0.29
  -2  -6   6    0.48    0.29
  -2  -6   6    0.55    0.28
  -2  -6   6    0.24    0.26
   1   6  -6    5.73    1.20
   1   6  -6    6.93    0.94
   1   6  -6    5.88    0.71
   1   6  -6    8.01    0.70
  -1  -6   6    7.57    0.66
  -1  -6   6    7.40    0.68
  -1  -6   6    7.49    0.65
   0   6  -6    2.18    0.37
   0   6  -6    2.14    0.49
   0   6  -6    2.34    0.36
   0   6  -6    2.73    0.41
   0   6  -6    2.01    0.37
   0   6  -6    2.36    0.39
   0   6  -6    1.79    0.49
   0  -6   6    2.54    0.33
  -1   6  -6    7.56    0.67
  -1   6  -6    5.79    0.64
  -1   6  -6    8.41    1.21
  -1   6  -6    6.12    0.66
  -1   6  -6    6.67    0.63
  -1   6  -6    7.16    0.68
  -1   6  -6    6.43    0.84
  -1   6  -6    6.85    0.69
   1  -6   6    6.44    0.64
  -2   6  -6   22.37    1.61
  -2   6  -6   24.74    1.99
  -2   6  -6   25.20    1.83
  -2   6  -6   19.27    1.66
  -2   6  -6   20.97    1.70
  -2   6  -6   24.55    1.66
  -2   6  -6   20.53    1.67
  -2   6  -6   21.50    1.64
   2  -6   6   22.27    1.65
  -3   6  -6   81.48    5.41
  -3   6  -6   84.10    5.41
  -3   6  -6   72.90    5.42
  -3   6  -6   87.27    5.44
  -3   6  -6   70.64    5.48
  -3   6  -6   80.01    5.38
  -3   6  -6   68.96    5.45
  -3   6  -6   72.66    5.44
  -4   6  -6    0.50    0.23
  -4   6  -6    0.50    0.45
  -4   6  -6    0.17    0.18
  -4   6  -6    0.14    0.20
  -4   6  -6    0.59    0.20
  -4   6  -6    0.53    0.17
  -4   6  -6    0.60    0.20
  -4   6  -6    0.45    0.37
  -4   6  -6    0.51    0.20
  -4   6  -6    0.59    0.47
  -4   6  -6    0.67    0.25
  -5   6  -6    3.90    0.40
  -5   6  -6    3.24    0.44
  -5   6  -6    4.87    0.51
  -5   6  -6    4.62    0.43
  -5   6  -6    3.43    0.67
  -5   6  -6    3.95    0.44
  -5   6  -6    2.72    0.57
  -5   6  -6    3.08    0.44
  -6   6  -6    0.91    0.50
  -6   6  -6    1.10    0.25
  -6   6  -6    1.54    0.32
  -6   6  -6    1.13    0.26
  -6   6  -6    1.02    0.25
  -6   6  -6    1.09    0.51
  -6   6  -6    1.80    0.33
  -6   6  -6    2.02    0.61
  -6   6  -6    1.22    0.23
  -7   6  -6    2.94    0.40
  -7   6  -6    2.00    0.57
  -7   6  -6    2.66    0.41
  -7   6  -6    2.56    0.34
  -7   6  -6    2.62    0.41
  -7   6  -6    1.96    0.57
  -7   6  -6    2.23    0.33
  -7   6  -6    3.15    0.42
  -8   6  -6   26.84    1.89
  -8   6  -6   23.21    1.99
  -8   6  -6   24.66    1.86
  -8   6  -6   25.07    1.89
  -8   6  -6   27.84    1.91
  -8   6  -6   26.56    1.86
  -9   6  -6   12.83    1.08
  -9   6  -6   14.53    1.20
  -9   6  -6   13.68    1.05
  -9   6  -6   15.35    1.10
 -10   6  -6    6.35    0.56
 -10   6  -6    6.47    0.56
 -10   6  -6    6.38    0.51
 -10   6  -6    6.15    0.67
 -11   6  -6    0.25    0.14
 -11   6  -6    0.11    0.09
 -11   6  -6    0.24    0.13
   8   5  -6    0.32    0.32
   8   5  -6   -0.78    0.50
   7   5  -6    8.11    1.14
  -7  -5   6    9.76    0.74
   6   5  -6   -0.89    0.91
   5   5  -6   18.52    2.15
   5   5  -6   21.86    1.59
  -5  -5   6   18.76    1.49
  -5  -5   6   18.23    1.45
  -5  -5   6   20.74    1.70
  -5  -5   6   19.53    1.45
  -5  -5   6   16.87    1.43
   4   5  -6    7.65    1.15
  -4  -5   6    8.64    0.80
  -4  -5   6    8.88    0.76
  -4  -5   6    8.22    0.81
  -4  -5   6    8.20    0.76
   3   5  -6   17.24    1.88
   3   5  -6   19.95    1.54
   3   5  -6   17.06    1.69
   3   5  -6   20.73    1.81
  -3  -5   6   17.34    1.46
  -3  -5   6   18.06    1.42
  -3  -5   6   18.62    1.40
  -3  -5   6   20.10    1.41
   2   5  -6    0.32    0.54
   2   5  -6    0.25    0.25
   2   5  -6    0.10    0.26
   2   5  -6    0.91    0.45
  -2  -5   6    0.36    0.23
  -2  -5   6    0.64    0.26
  -2  -5   6    0.47    0.24
  -2  -5   6    0.43    0.27
   1   5  -6    0.30    0.26
   1   5  -6    0.25    0.46
   1   5  -6   -0.05    0.35
   1   5  -6   -0.41    0.40
   1   5  -6   -0.14    0.18
   1   5  -6    0.29    0.26
  -1  -5   6    0.13    0.19
  -1  -5   6    0.19    0.20
  -1  -5   6    0.02    0.20
   0   5  -6    8.48    0.91
   0   5  -6    9.99    0.80
   0   5  -6    7.48    0.79
   0  -5   6    8.39    0.70
   0  -5   6    9.24    0.70
   0  -5   6    9.11    0.73
  -1   5  -6   49.64    3.42
  -1   5  -6   46.59    3.50
  -1   5  -6   42.69    3.44
   1  -5   6   52.82    3.39
  -2   5  -6    5.46    0.60
  -2   5  -6    7.96    0.78
  -2   5  -6    6.15    0.62
  -2   5  -6    5.34    0.60
  -2   5  -6    7.21    0.57
  -2   5  -6    6.20    0.55
  -2   5  -6    7.11    0.59
  -2   5  -6    8.48    0.96
  -3   5  -6    6.44    0.56
  -3   5  -6    7.17    0.56
  -3   5  -6    5.04    0.57
  -3   5  -6    6.03    0.52
  -4   5  -6   23.28    1.74
  -4   5  -6   25.80    1.74
  -4   5  -6   25.00    1.84
  -4   5  -6   23.60    1.79
  -4   5  -6   22.41    1.78
  -5   5  -6    0.20    0.18
  -5   5  -6    0.61    0.24
  -5   5  -6    0.03    0.39
  -5   5  -6    0.25    0.38
  -5   5  -6    0.21    0.14
  -5   5  -6    0.13    0.16
  -5   5  -6    0.32    0.22
  -5   5  -6    0.21    0.17
  -5   5  -6    0.54    0.44
  -6   5  -6    3.86    0.39
  -6   5  -6    3.70    0.43
  -6   5  -6    2.91    0.55
  -6   5  -6    3.44    0.42
  -6   5  -6    3.97    0.50
  -6   5  -6    3.08    0.44
  -7   5  -6   35.84    2.88
  -7   5  -6   42.66    2.78
  -7   5  -6   41.78    3.01
  -7   5  -6   35.13    2.74
  -7   5  -6   38.56    2.76
  -8   5  -6    5.27    0.50
  -8   5  -6    6.17    0.82
  -8   5  -6    6.29    0.55
  -8   5  -6    4.75    0.53
  -8   5  -6    4.42    0.80
  -8   5  -6    4.77    0.52
  -8   5  -6    4.74    0.60
  -8   5  -6    5.97    0.61
  -9   5  -6   32.11    2.27
  -9   5  -6   31.62    2.24
  -9   5  -6   28.64    2.22
  -9   5  -6   31.15    2.33
  -9   5  -6   31.86    2.25
 -10   5  -6    9.85    0.75
 -10   5  -6    9.39    0.78
 -10   5  -6    9.44    0.79
 -10   5  -6   10.38    0.90
  10  -5   6    8.63    0.84
 -11   5  -6   11.05    0.83
 -11   5  -6   11.12    0.84
 -11   5  -6   10.65    0.81
   8   4  -6    9.04    1.19
  -8  -4   6    7.89    0.69
  -7  -4   6    0.38    0.19
   6   4  -6   -1.29    0.93
   5   4  -6   20.44    2.44
  -5  -4   6   24.90    1.77
  -5  -4   6   24.22    1.73
  -5  -4   6   22.67    1.73
  -5  -4   6   23.55    1.73
   4   4  -6    2.33    0.59
   4   4  -6    0.27    0.95
  -4  -4   6    2.84    0.40
  -4  -4   6    1.84    0.32
  -4  -4   6    1.89    0.33
  -4  -4   6    2.08    0.30
   3   4  -6   14.94    1.79
   3   4  -6   16.43    1.61
   3   4  -6   20.77    1.47
  -3  -4   6   16.34    1.39
  -3  -4   6   18.36    1.33
  -3  -4   6   19.22    1.33
  -3  -4   6   18.05    1.35
   2   4  -6    0.63    0.28
   2   4  -6    0.00    0.40
   2   4  -6    0.08    0.57
  -2  -4   6    0.37    0.20
  -2  -4   6    0.55    0.25
  -2  -4   6    0.28    0.22
  -2  -4   6    0.11    0.19
   1   4  -6    2.05    0.46
   1   4  -6    1.95    0.59
   1   4  -6    1.81    0.34
  -1  -4   6    2.72    0.31
  -1  -4   6    1.87    0.26
  -1  -4   6    2.30    0.32
   0  -4   6    8.74    0.69
   0  -4   6    8.51    0.67
  -1   4  -6  105.13    7.50
  -2   4  -6   66.92    4.86
  -4   4  -6   14.22    1.34
  -4   4  -6   17.35    1.24
  -4   4  -6   16.90    1.47
  -4   4  -6   18.01    1.25
  -5   4  -6   57.75    3.74
  -5   4  -6   52.68    3.81
  -5   4  -6   48.10    3.77
  -6   4  -6    2.51    0.36
  -6   4  -6    3.24    0.62
  -6   4  -6    2.28    0.34
  -6   4  -6    2.49    0.34
  -6   4  -6    2.96    0.42
  -6   4  -6    3.03    0.39
  -6   4  -6    1.71    0.46
  -7   4  -6   53.35    3.49
  -7   4  -6   43.77    3.50
  -7   4  -6   48.01    3.49
  -7   4  -6   55.02    3.70
  -7   4  -6   46.17    3.48
  -8   4  -6    8.10    0.71
  -8   4  -6    7.31    0.68
  -8   4  -6    8.29    0.87
  -8   4  -6    6.51    0.67
  -8   4  -6    7.20    0.63
  -8   4  -6    5.98    0.60
  -8   4  -6    8.08    1.02
   8  -4   6    7.49    1.34
   8  -4   6    6.06    0.71
  -9   4  -6   92.16    6.06
  -9   4  -6   81.16    6.05
  -9   4  -6   76.21    6.06
  -9   4  -6   83.87    6.07
  -9   4  -6   91.16    6.12
   9  -4   6   81.62    6.06
   9  -4   6   94.68    6.07
   9  -4   6   91.34    6.49
 -10   4  -6    7.27    0.68
 -10   4  -6    9.00    0.72
 -10   4  -6    7.70    0.73
 -10   4  -6    8.51    0.69
 -10   4  -6    8.93    0.85
  10  -4   6    7.63    0.81
 -11   4  -6    0.78    0.21
 -11   4  -6    0.81    0.18
 -11   4  -6    0.85    0.18
 -11   4  -6    0.81    0.21
  11  -4   6    1.01    0.30
  12  -4   6    4.45    0.50
  -8  -3   6    0.02    0.21
   7   3  -6    0.26    0.90
   6   3  -6    9.78    1.45
  -6  -3   6   11.19    1.01
  -6  -3   6   11.47    0.88
  -6  -3   6   11.16    0.95
   5   3  -6    6.59    1.19
  -5  -3   6    7.30    0.67
  -5  -3   6    7.36    0.65
  -5  -3   6    6.88    0.64
  -5  -3   6    7.68    0.73
   4   3  -6   47.37    3.71
   4   3  -6   47.20    3.86
  -4  -3   6   51.63    3.45
  -4  -3   6   46.26    3.45
  -4  -3   6   51.51    3.47
  -4  -3   6   48.86    3.45
  -3  -3   6   49.76    3.38
  -3  -3   6   42.90    3.40
  -3  -3   6   50.58    3.38
  -3  -3   6   48.86    3.38
   2   3  -6    7.01    0.99
  -2  -3   6    6.40    0.58
  -2  -3   6    7.27    0.66
  -2  -3   6    6.54    0.57
  -2  -3   6    6.71    0.56
  -1  -3   6   26.55    1.84
  -1  -3   6   26.60    1.84
  -1  -3   6   24.78    1.85
   0  -3   6    2.71    0.30
   0  -3   6    2.73    0.30
   0  -3   6    3.06    0.32
  -1   3  -6    5.61    0.76
   1  -3   6    4.36    0.43
   1  -3   6    4.64    0.39
   1  -3   6    4.14    0.37
  -2   3  -6    5.24    0.68
   2  -3   6    4.01    0.39
  -4   3  -6    9.26    0.95
  -5   3  -6  250.26   17.39
  -6   3  -6   55.21    4.02
  -6   3  -6   59.65    4.06
  -6   3  -6   60.91    4.07
   6  -3   6   54.74    4.06
  -7   3  -6    0.24    0.15
  -7   3  -6    0.89    0.49
  -7   3  -6    0.33    0.19
  -7   3  -6    0.37    0.23
  -7   3  -6    0.92    0.40
  -7   3  -6    0.32    0.20
  -7   3  -6    0.53    0.20
  -7   3  -6    0.37    0.23
  -7   3  -6    0.59    0.24
   7  -3   6    0.18    0.68
   7  -3   6    0.76    0.30
   7  -3   6   -0.09    0.24
   7  -3   6    0.72    0.30
  -8   3  -6  124.84    9.46
  -8   3  -6  130.78    9.60
  -8   3  -6  135.54    9.48
   8  -3   6  129.36    9.78
   8  -3   6  150.71    9.48
   8  -3   6  142.15    9.47
  -9   3  -6    6.85    0.64
  -9   3  -6    6.23    0.67
  -9   3  -6    6.16    1.00
  -9   3  -6    5.64    0.64
  -9   3  -6    5.79    0.60
   9  -3   6    9.10    1.61
   9  -3   6    6.43    0.75
 -10   3  -6    8.95    0.88
 -10   3  -6   11.85    0.87
 -10   3  -6   10.42    0.89
  10  -3   6   10.63    0.99
 -11   3  -6    0.53    0.21
 -11   3  -6    0.79    0.23
 -11   3  -6    0.74    0.21
 -11   3  -6    0.54    0.19
  11  -3   6    0.80    0.34
 -12   3  -6    0.32    0.13
 -12   3  -6    0.37    0.15
  12  -3   6    0.45    0.26
   8   2  -6    9.31    1.42
  -8  -2   6   11.60    0.89
   7   2  -6   13.57    1.87
  -7  -2   6   16.87    1.24
   6   2  -6   10.97    1.54
  -6  -2   6   14.12    1.05
  -6  -2   6   12.37    1.06
  -6  -2   6   12.59    0.97
   5   2  -6   13.61    1.97
  -5  -2   6   15.52    1.18
  -5  -2   6   15.15    1.15
  -5  -2   6   14.91    1.12
  -5  -2   6   14.08    1.12
   4   2  -6   24.69    2.40
  -4  -2   6   26.59    1.85
  -4  -2   6   24.64    1.83
  -4  -2   6   25.77    1.84
  -4  -2   6   25.02    1.83
   3   2  -6   22.80    2.27
  -3  -2   6   23.19    1.76
  -3  -2   6   24.18    1.72
  -3  -2   6   24.03    1.73
  -3  -2   6   25.26    1.72
  -2  -2   6   22.80    1.60
  -2  -2   6   21.08    1.61
  -2  -2   6   23.38    1.60
   1   2  -6   38.13    2.66
  -1  -2   6   37.44    2.51
  -1  -2   6   35.95    2.51
  -1  -2   6   31.82    2.51
   0   2  -6    2.72    0.40
   0  -2   6    3.13    0.30
   0  -2   6    3.55    0.30
   0  -2   6    3.04    0.31
   1  -2   6    5.75    0.45
   1  -2   6    5.72    0.46
   1  -2   6    5.88    0.49
   2  -2   6   30.17    2.13
   2  -2   6   30.32    2.13
  -5   2  -6    9.85    0.97
   5  -2   6   10.97    0.82
  -6   2  -6    6.09    0.60
  -6   2  -6    5.10    0.49
  -6   2  -6    5.61    0.80
  -6   2  -6    4.65    0.49
  -6   2  -6    4.10    0.49
  -6   2  -6    5.40    0.74
   6  -2   6    4.81    0.53
   6  -2   6    4.76    0.81
  -7   2  -6   11.28    1.07
  -7   2  -6    9.52    1.40
  -7   2  -6    8.99    0.80
  -7   2  -6    9.23    0.81
  -7   2  -6    9.92    0.83
   7  -2   6    9.20    1.37
   7  -2   6   10.70    0.87
  -8   2  -6   46.52    3.61
  -8   2  -6   41.81    3.25
  -8   2  -6   49.05    3.23
  -8   2  -6   40.12    3.26
  -8   2  -6   46.49    3.24
   8  -2   6   50.21    3.28
   8  -2   6   45.06    3.26
  -9   2  -6   34.89    2.70
  -9   2  -6   37.26    2.96
  -9   2  -6   33.82    2.46
  -9   2  -6   35.79    2.47
  -9   2  -6   31.44    2.48
   9  -2   6   34.52    2.52
   9  -2   6   31.47    3.02
   9  -2   6   35.83    2.51
 -10   2  -6   68.58    4.46
 -10   2  -6   65.36    4.93
 -10   2  -6   60.96    4.45
 -10   2  -6   57.21    4.45
  10  -2   6   62.81    4.47
 -11   2  -6   10.82    0.93
 -11   2  -6   12.05    0.93
  11  -2   6   12.20    1.09
 -12   2  -6    6.57    0.55
 -12   2  -6    5.97    0.55
  12  -2   6    7.56    0.74
   8   1  -6   25.59    2.26
  -8  -1   6   26.49    1.89
   7   1  -6    2.10    1.00
  -7  -1   6    3.38    0.29
  -7  -1   6    3.78    0.48
   6   1  -6    0.26    0.94
  -6  -1   6    0.28    0.30
  -6  -1   6    0.63    0.27
  -6  -1   6    0.50    0.40
   5   1  -6    4.41    0.66
   5   1  -6    5.07    1.14
  -5  -1   6    3.13    0.43
  -5  -1   6    3.73    0.50
  -5  -1   6    3.67    0.43
  -5  -1   6    3.56    0.45
   4   1  -6    0.09    0.53
   4   1  -6    0.66    0.77
   4   1  -6    0.70    0.33
  -4  -1   6    0.53    0.17
  -4  -1   6    0.49    0.19
  -4  -1   6    0.42    0.24
  -4  -1   6    0.28    0.18
  -4  -1   6    0.30    0.17
  -3  -1   6   19.22    1.46
  -3  -1   6   19.62    1.45
  -3  -1   6   19.34    1.45
  -3  -1   6   22.44    1.49
   2   1  -6   55.58    3.80
  -2  -1   6   52.61    3.64
  -2  -1   6   48.48    3.64
   1   1  -6   70.65    5.01
   0   1  -6   35.62    2.53
   0   1  -6   38.39    2.46
   0  -1   6   31.02    2.45
   0  -1   6   35.45    2.46
  -1   1  -6    2.06    0.38
   1  -1   6    2.72    0.24
   1  -1   6    2.20    0.28
   1  -1   6    2.49    0.25
  -2   1  -6    5.80    0.62
  -2   1  -6    5.32    0.53
   2  -1   6    4.63    0.42
   2  -1   6    4.97    0.41
  -3   1  -6   26.63    1.86
   3  -1   6   24.41    1.82
   3  -1   6   25.99    1.81
  -4   1  -6   35.31    2.38
  -4   1  -6   33.59    2.45
   4  -1   6   31.54    2.36
   4  -1   6   33.14    2.35
  -5   1  -6    4.11    0.57
  -5   1  -6    3.83    0.68
  -5   1  -6    3.59    0.42
   5  -1   6    4.34    0.78
   5  -1   6    4.52    0.43
   5  -1   6    4.25    0.42
  -6   1  -6   12.52    0.97
  -6   1  -6   12.62    1.13
  -6   1  -6   14.42    1.06
  -6   1  -6   11.72    1.37
   6  -1   6   13.21    0.99
   6  -1   6   11.40    0.99
   6  -1   6   11.26    1.33
  -7   1  -6   43.60    3.37
  -7   1  -6   44.40    3.15
  -7   1  -6   44.73    3.04
  -7   1  -6   39.03    3.00
  -7   1  -6   39.01    3.00
  -7   1  -6   47.01    3.03
   7  -1   6   38.60    3.32
   7  -1   6   42.64    3.03
  -8   1  -6   81.05    5.69
  -8   1  -6   78.60    5.72
  -8   1  -6   76.20    6.02
  -8   1  -6   83.41    5.85
   8  -1   6   84.00    5.72
   8  -1   6   76.10    6.01
   8  -1   6   86.70    5.72
   8  -1   6   83.66    5.73
  -9   1  -6  397.37   27.37
  -9   1  -6  392.05   27.23
  -9   1  -6  428.06   27.08
   9  -1   6  343.66   27.34
   9  -1   6  412.58   27.12
   9  -1   6  371.63   27.10
 -10   1  -6    0.54    0.61
 -10   1  -6   -0.15    0.23
 -10   1  -6    1.27    0.91
 -10   1  -6    0.41    0.26
 -10   1  -6    0.45    0.30
 -10   1  -6    0.15    0.27
 -10   1  -6    0.31    0.30
  10  -1   6    0.70    0.35
  10  -1   6    0.44    0.70
  10  -1   6    0.32    0.30
 -11   1  -6    2.29    0.31
 -11   1  -6    2.78    0.43
 -11   1  -6    2.57    0.45
 -11   1  -6    3.32    0.42
 -12   1  -6   10.64    0.80
 -12   1  -6    9.55    0.76
 -12   1  -6    9.53    0.78
  12  -1   6   11.08    0.95
   8   0  -6    2.16    0.68
  -8   0   6    1.78    0.36
  -8   0   6    2.03    0.23
   7   0  -6    3.04    0.96
  -7   0   6    1.88    0.21
  -7   0   6    1.69    0.29
   6   0  -6   24.97    2.62
  -6   0   6   27.74    1.98
  -6   0   6   27.30    1.96
   5   0  -6    5.53    0.80
   5   0  -6    7.22    1.17
   5   0  -6    6.07    0.79
  -5   0   6    5.18    0.59
  -5   0   6    5.29    0.54
   4   0  -6   17.57    1.42
   4   0  -6   17.51    1.95
  -4   0   6   17.41    1.77
  -4   0   6   16.97    1.29
   3   0  -6    6.22    0.63
   3   0  -6    4.65    0.65
  -3   0   6    4.43    0.43
  -3   0   6    5.42    0.47
  -3   0   6    5.54    0.96
  -3   0   6    4.66    0.42
   2   0  -6    0.50    0.28
   2   0  -6    0.38    0.27
   2   0  -6   -0.21    0.32
  -2   0   6    0.43    0.13
  -2   0   6    0.27    0.43
  -2   0   6    0.64    0.16
   1   0  -6    2.14    0.30
   1   0  -6    1.62    0.31
   1   0  -6    2.33    0.30
  -1   0   6    1.31    0.18
  -1   0   6    1.76    0.45
  -1   0   6    1.54    0.21
  -1   0   6    1.45    0.21
   0   0  -6    2.28    0.25
   0   0  -6    2.12    0.27
   0   0   6    2.67    0.43
   0   0   6    2.31    0.23
   0   0   6    1.57    0.22
   0   0   6    1.54    0.21
  -1   0  -6   42.93    3.00
   1   0   6   40.94    3.09
   2   0   6  114.06    8.05
   3   0   6  167.50   11.76
   4   0   6   68.73    4.91
  -5   0  -6   78.40    5.58
   5   0   6   79.90    5.68
  -6   0  -6  110.29    7.51
   6   0   6  112.33    7.43
   6   0   6  102.05    7.60
   6   0   6  101.36    7.43
  -7   0  -6  161.49   12.88
  -7   0  -6  192.50   12.73
  -7   0  -6  196.51   12.64
  -7   0  -6  184.14   12.66
   7   0   6  188.78   12.64
   7   0   6  166.51   12.64
  -8   0  -6  201.42   15.20
  -8   0  -6  236.36   15.24
  -8   0  -6  209.23   15.23
  -8   0  -6  228.50   15.35
  -8   0  -6  207.56   15.53
  -8   0  -6  228.81   15.25
   8   0   6  227.75   15.24
   8   0   6  216.23   15.25
   8   0   6  217.43   15.46
  -9   0  -6   97.58    6.19
  -9   0  -6   93.10    6.63
  -9   0  -6   90.08    6.20
  -9   0  -6   88.67    6.14
  -9   0  -6   85.10    6.32
   9   0   6   84.31    6.18
   9   0   6   77.09    6.46
 -10   0  -6  141.76    9.31
 -10   0  -6  132.96    8.92
 -10   0  -6  129.17    8.91
 -10   0  -6  131.34    8.93
 -10   0  -6  117.97    9.04
  10   0   6  137.68    8.94
  10   0   6  110.55    8.90
  10   0   6  120.28    9.22
 -11   0  -6   13.61    1.12
 -11   0  -6   17.09    1.16
 -11   0  -6   13.02    1.15
  11   0   6   15.26    1.25
 -12   0  -6    1.65    0.26
 -12   0  -6    1.27    0.21
 -12   0  -6    0.99    0.25
 -12   0  -6    1.52    0.25
  -8   1   6   10.03    0.68
  -8   1   6    8.35    0.73
   7  -1  -6    1.35    0.39
   6  -1  -6   18.88    1.96
  -6   1   6   15.97    1.25
  -6   1   6   15.94    1.23
  -6   1   6   16.14    1.77
   5  -1  -6    9.94    1.22
   5  -1  -6   11.57    1.09
   5  -1  -6   10.75    1.21
  -5   1   6   10.13    0.87
  -5   1   6   10.74    0.91
  -5   1   6   11.57    1.44
  -5   1   6   12.22    0.90
   4  -1  -6   14.20    1.31
  -4   1   6   15.21    1.15
  -4   1   6   13.81    1.13
  -4   1   6   17.64    1.59
  -4   1   6   16.08    1.15
   3  -1  -6    0.57    0.35
   3  -1  -6    1.31    0.35
   3  -1  -6    0.25    0.37
   3  -1  -6    0.61    0.34
  -3   1   6    0.82    0.50
  -3   1   6    0.58    0.20
  -3   1   6    0.74    0.19
  -3   1   6    0.53    0.13
  -3   1   6    0.80    0.18
  -2   1   6   32.27    2.24
  -2   1   6   31.34    2.24
   1  -1  -6    2.28    0.31
   1  -1  -6    2.65    0.29
  -1   1   6    2.75    0.50
  -1   1   6    1.95    0.23
  -1   1   6    2.32    0.24
  -1   1   6    1.76    0.24
   0  -1  -6    4.46    0.46
   0  -1  -6    4.22    0.36
   0  -1  -6    4.20    0.47
   0   1   6    4.67    0.67
   0   1   6    3.15    0.32
   0   1   6    4.03    0.33
  -1  -1  -6   17.22    1.32
  -1  -1  -6   18.76    1.27
   1   1   6   17.48    1.27
   1   1   6   20.31    1.48
   1   1   6   16.40    1.26
   2   1   6  182.49   12.78
   3   1   6   76.12    5.52
  -4  -1  -6  364.94   25.46
  -5  -1  -6    5.68    0.84
  -5  -1  -6    4.62    0.43
  -5  -1  -6    5.06    0.57
   5   1   6    4.72    0.68
   5   1   6    5.47    0.48
   5   1   6    5.23    0.46
  -6  -1  -6   37.40    2.67
   6   1   6   37.24    2.60
   6   1   6   37.16    2.58
   6   1   6   33.10    2.77
  -7  -1  -6   47.83    3.23
  -7  -1  -6   46.41    3.31
   7   1   6   47.66    3.22
   7   1   6   47.31    3.20
   7   1   6   42.56    3.43
   7   1   6   39.24    3.19
  -8  -1  -6   22.40    1.62
  -8  -1  -6   20.57    2.23
  -8  -1  -6   18.39    1.74
  -8  -1  -6   20.75    1.58
   8   1   6   21.39    1.57
   8   1   6   21.61    1.58
   8   1   6   22.01    1.60
   8   1   6   20.77    1.95
  -9  -1  -6   31.17    2.48
  -9  -1  -6   32.04    3.05
  -9  -1  -6   35.23    2.52
  -9  -1  -6   38.29    2.51
  -9  -1  -6   34.63    2.67
  -9  -1  -6   30.28    2.47
   9   1   6   35.27    2.47
   9   1   6   38.19    2.51
   9   1   6   32.63    2.48
   9   1   6   35.15    2.87
 -10  -1  -6   47.70    3.62
 -10  -1  -6   49.12    3.80
 -10  -1  -6   55.99    4.16
 -10  -1  -6   55.74    3.66
  10   1   6   47.42    3.63
  10   1   6   49.54    3.65
  10   1   6   53.02    3.65
 -11  -1  -6    0.30    0.32
 -11  -1  -6    0.64    0.27
 -11  -1  -6    0.35    0.20
 -11  -1  -6    0.49    0.30
 -12  -1  -6    1.13    0.26
 -12  -1  -6    1.59    0.26
 -12  -1  -6    0.86    0.27
  -8   2   6    9.27    0.63
  -8   2   6    8.19    0.65
   7  -2  -6    3.98    0.64
  -7   2   6    3.32    0.40
  -7   2   6    3.12    0.29
   6  -2  -6    0.72    0.40
  -6   2   6    0.75    0.26
  -6   2   6    1.20    0.19
  -6   2   6    0.89    0.65
   5  -2  -6   31.33    2.61
   5  -2  -6   33.30    2.55
   5  -2  -6   35.11    2.58
  -5   2   6   38.03    2.47
  -5   2   6   32.95    2.44
  -5   2   6   35.27    2.75
   4  -2  -6    2.36    0.48
   4  -2  -6    2.71    0.48
   4  -2  -6    3.79    0.55
  -4   2   6    3.15    0.70
  -4   2   6    2.78    0.38
  -4   2   6    3.07    0.40
  -4   2   6    2.94    0.42
   3  -2  -6   34.35    2.27
   3  -2  -6   28.58    2.31
  -3   2   6   32.30    2.46
  -3   2   6   29.92    2.21
   2  -2  -6   67.09    4.85
   2  -2  -6   70.01    4.84
  -2   2   6   74.33    4.96
  -2   2   6   64.04    4.79
   1  -2  -6    1.81    0.27
  -1   2   6    1.51    0.19
  -1   2   6    1.29    0.17
  -1   2   6    1.48    0.20
  -1   2   6    2.06    0.47
   0   2   6   33.08    2.13
   0   2   6   27.82    2.13
   1   2   6  202.86   14.18
   2   2   6   33.25    2.57
   2   2   6   39.57    2.77
   2   2   6   38.46    2.59
   3   2   6   82.17    5.84
  -4  -2  -6  218.55   15.36
  -5  -2  -6   25.32    1.90
  -5  -2  -6   24.00    1.83
  -5  -2  -6   26.59    1.84
   5   2   6   26.90    1.86
   5   2   6   26.53    1.84
   5   2   6   25.55    2.02
  -6  -2  -6   13.33    1.01
  -6  -2  -6   12.36    0.99
  -6  -2  -6   15.02    1.14
   6   2   6   14.11    1.04
   6   2   6   12.04    1.24
   6   2   6   13.85    1.02
  -7  -2  -6   13.70    1.10
  -7  -2  -6   13.36    1.03
   7   2   6   14.28    1.07
   7   2   6   11.94    1.32
   7   2   6   14.34    1.05
  -8  -2  -6    6.26    0.72
  -8  -2  -6    4.62    1.09
  -8  -2  -6    7.71    0.93
  -8  -2  -6    7.24    0.80
   8   2   6    6.31    0.95
   8   2   6    7.20    0.64
   8   2   6    5.88    1.08
   8   2   6    7.44    0.64
   8   2   6    6.18    0.61
  -9  -2  -6   28.59    2.15
  -9  -2  -6   24.81    1.99
  -9  -2  -6   26.34    1.99
  -9  -2  -6   25.86    2.65
   9   2   6   26.36    1.94
   9   2   6   24.61    1.92
   9   2   6   28.48    2.32
 -10  -2  -6   30.84    2.85
 -10  -2  -6   23.64    2.01
  10   2   6   26.30    1.98
  10   2   6   30.88    2.41
  10   2   6   26.15    1.97
 -11  -2  -6    3.14    0.41
  11   2   6    2.20    0.53
 -12  -2  -6    1.84    0.27
 -12  -2  -6    1.02    0.29
 -12  -2  -6    1.52    0.28
  -8   3   6    3.27    0.31
  -8   3   6    3.65    0.28
   7  -3  -6    5.78    0.69
  -7   3   6    4.70    0.50
  -7   3   6    4.25    0.44
  -7   3   6    4.38    0.36
  -7   3   6    4.41    0.40
   6  -3  -6    1.06    0.43
  -6   3   6    1.76    0.22
  -6   3   6    1.68    0.32
  -6   3   6    2.15    0.34
   5  -3  -6    0.64    0.43
   5  -3  -6    0.92    0.54
   5  -3  -6    0.83    0.44
  -5   3   6    1.27    0.20
  -5   3   6    1.42    0.29
  -5   3   6    1.64    0.32
  -5   3   6    1.50    0.58
  -5   3   6    1.58    0.38
   4  -3  -6   -0.23    0.33
   4  -3  -6   -0.15    0.37
   4  -3  -6    0.35    0.38
  -4   3   6    0.09    0.22
  -4   3   6    0.40    0.52
  -4   3   6    0.09    0.10
  -4   3   6    0.18    0.19
  -4   3   6    0.48    0.22
   3  -3  -6   10.47    0.82
   3  -3  -6    9.60    0.93
   3  -3  -6   10.22    0.87
  -3   3   6    8.69    0.73
  -3   3   6    9.09    0.77
  -3   3   6   10.93    0.77
  -3   3   6   10.47    1.13
   2  -3  -6   21.35    1.54
   2  -3  -6   19.58    1.55
   2  -3  -6   22.70    1.51
  -2   3   6   19.67    1.48
   1  -3  -6   18.45    1.52
   1  -3  -6   20.44    1.46
   1  -3  -6   22.06    1.47
  -1   3   6   20.28    1.67
   0  -3  -6   67.23    4.93
   0   3   6   73.41    5.05
  -1  -3  -6    0.89    0.17
  -1  -3  -6    1.09    0.20
  -1  -3  -6    0.89    0.17
  -1  -3  -6    0.95    0.21
   1   3   6    0.99    0.39
   1   3   6    0.65    0.11
  -2  -3  -6    1.28    0.23
  -2  -3  -6    1.79    0.24
  -2  -3  -6    1.75    0.28
  -2  -3  -6    1.50    0.19
   2   3   6    1.34    0.20
   2   3   6    1.26    0.41
   3   3   6  142.18   10.08
  -4  -3  -6    1.19    0.52
  -4  -3  -6    0.53    0.16
  -4  -3  -6    0.42    0.24
  -4  -3  -6    0.38    0.29
  -4  -3  -6    0.70    0.17
   4   3   6    0.63    0.29
   4   3   6    0.78    0.15
   4   3   6    0.44    0.16
  -5  -3  -6  101.37    7.72
  -5  -3  -6   98.67    7.44
   5   3   6  114.69    7.41
   5   3   6  110.34    7.40
  -6  -3  -6    0.97    0.42
  -6  -3  -6    0.91    0.27
  -6  -3  -6    0.99    0.22
  -6  -3  -6    0.29    0.32
  -6  -3  -6    0.76    0.22
  -6  -3  -6    0.65    0.60
   6   3   6    0.95    0.22
   6   3   6    0.68    0.19
  -7  -3  -6   18.77    1.28
  -7  -3  -6   18.71    1.45
  -7  -3  -6   17.02    1.26
  -7  -3  -6   14.21    2.03
  -7  -3  -6   17.13    1.33
   7   3   6   16.73    1.45
   7   3   6   17.04    1.27
   7   3   6   14.53    1.53
   7   3   6   16.33    1.25
   7   3   6   16.26    1.25
  -8  -3  -6    6.47    0.85
  -8  -3  -6    7.07    0.92
  -8  -3  -6    6.73    0.73
  -8  -3  -6    6.05    1.34
  -8  -3  -6    6.91    0.65
   8   3   6    6.33    0.62
   8   3   6    6.88    0.63
   8   3   6    5.43    1.04
   8   3   6    7.00    0.91
  -9  -3  -6    8.07    1.07
  -9  -3  -6    7.62    0.91
  -9  -3  -6    8.74    0.87
  -9  -3  -6    7.09    1.32
   9   3   6    9.34    0.76
   9   3   6   10.24    1.32
  10   3   6    6.54    0.96
  10   3   6    6.81    0.68
 -11  -3  -6    0.52    0.33
 -11  -3  -6    0.73    0.29
  11   3   6    1.08    0.47
 -12  -3  -6   16.58    1.18
 -12  -3  -6   15.03    1.18
  -8   4   6    0.98    0.15
  -8   4   6    1.32    0.13
  -8   4   6    1.45    0.19
  -7   4   6    6.48    0.54
  -7   4   6    6.90    0.50
  -7   4   6    7.61    0.61
  -7   4   6    5.96    0.52
   6  -4  -6   19.10    1.53
  -6   4   6   19.63    1.36
  -6   4   6   16.71    1.33
  -6   4   6   19.99    1.43
   5  -4  -6    7.30    0.91
   5  -4  -6    6.84    1.23
   5  -4  -6    6.75    0.76
   5  -4  -6    5.94    0.81
  -5   4   6    7.08    0.66
  -5   4   6    9.01    1.05
  -5   4   6    6.49    0.53
  -5   4   6    6.66    0.54
   4  -4  -6    2.30    0.46
   4  -4  -6    2.74    0.45
   4  -4  -6    1.65    0.43
  -4   4   6    2.28    0.25
  -4   4   6    2.63    0.41
  -4   4   6    2.83    0.33
  -4   4   6    3.21    0.35
  -4   4   6    1.93    0.58
   3  -4  -6   28.07    2.08
   3  -4  -6   28.99    2.04
   3  -4  -6   26.44    2.00
  -3   4   6   27.15    1.95
  -3   4   6   29.70    2.20
  -3   4   6   26.53    1.97
   2  -4  -6    0.31    0.25
   2  -4  -6    0.18    0.29
   2  -4  -6    0.50    0.19
  -2   4   6    0.37    0.40
  -2   4   6    0.53    0.19
   1  -4  -6   43.87    2.91
   1  -4  -6   45.10    2.91
   1  -4  -6   38.63    2.95
  -1   4   6   37.02    2.91
  -1   4   6   41.96    3.05
   0  -4  -6   17.67    1.18
   0  -4  -6   16.93    1.17
   0  -4  -6   15.31    1.20
   0  -4  -6   14.16    1.22
   0   4   6   15.96    1.39
  -1  -4  -6   14.36    1.06
  -1  -4  -6   13.84    1.10
  -1  -4  -6   13.47    1.11
  -1  -4  -6   15.49    1.06
   1   4   6   14.82    1.30
   2   4   6  129.48    9.14
  -3  -4  -6    7.96    0.78
  -3  -4  -6    7.84    0.66
  -3  -4  -6    8.66    0.66
   3   4   6    9.33    0.94
  -5  -4  -6    0.84    0.22
  -5  -4  -6    0.25    0.37
  -5  -4  -6    0.29    0.32
  -5  -4  -6    0.62    0.23
  -5  -4  -6    0.28    0.25
   5   4   6    0.28    0.17
   5   4   6    0.13    0.34
  -6  -4  -6    7.75    0.66
  -6  -4  -6    7.94    0.65
  -6  -4  -6    6.07    0.74
  -6  -4  -6    7.81    0.89
   6   4   6    6.23    0.61
   6   4   6    6.89    0.94
   6   4   6    6.31    0.79
  -7  -4  -6   83.43    6.10
  -7  -4  -6   84.03    6.15
  -7  -4  -6   82.48    6.01
  -7  -4  -6   91.86    6.03
   7   4   6   87.55    6.15
   7   4   6   89.85    6.25
   7   4   6   89.44    5.99
   7   4   6   78.63    6.01
  -8  -4  -6    1.22    0.29
  -8  -4  -6    0.51    0.39
  -8  -4  -6    0.71    0.48
  -8  -4  -6    0.93    0.32
   8   4   6    0.89    0.43
   8   4   6    0.49    0.57
  -9  -4  -6  110.07    7.96
  -9  -4  -6  109.94    7.87
  -9  -4  -6  116.54    7.82
 -10  -4  -6   16.74    1.34
 -11  -4  -6   13.83    1.20
  11   4   6   18.05    1.41
 -12  -4  -6    1.72    0.26
 -12  -4  -6    2.15    0.33
   7  -5  -6    0.07    0.30
  -7   5   6    0.23    0.07
  -7   5   6    0.13    0.19
  -7   5   6    0.17    0.13
  -7   5   6    0.28    0.13
   6  -5  -6    6.18    0.77
  -6   5   6    6.54    0.58
  -6   5   6    5.78    0.47
  -6   5   6    5.46    0.44
  -6   5   6    4.81    0.47
   5  -5  -6    5.68    0.83
  -5   5   6    5.01    0.58
  -5   5   6    5.59    0.47
  -5   5   6    6.46    0.87
  -5   5   6    5.28    0.44
   4  -5  -6    0.18    0.33
   4  -5  -6   -0.15    0.36
   4  -5  -6   -0.25    0.32
  -4   5   6    0.36    0.17
  -4   5   6    0.21    0.24
  -4   5   6    0.37    0.11
  -4   5   6    0.27    0.46
  -4   5   6    0.55    0.14
   3  -5  -6    5.12    0.68
   3  -5  -6    4.73    0.56
  -3   5   6    4.36    0.51
  -3   5   6    4.25    0.38
  -3   5   6    4.85    0.45
  -3   5   6    5.20    0.85
   2  -5  -6   27.72    1.99
   2  -5  -6   29.46    1.94
   2  -5  -6   24.75    1.97
  -2   5   6   28.20    1.91
  -2   5   6   26.53    2.10
  -2   5   6   25.23    1.93
   1  -5  -6    5.65    0.62
   1  -5  -6    6.08    0.51
   1  -5  -6    4.44    0.48
  -1   5   6    5.31    0.77
  -1   5   6    4.86    0.48
  -1   5   6    5.42    0.46
  -1   5   6    4.64    0.43
   0  -5  -6   12.87    1.01
   0  -5  -6   12.15    1.04
   0  -5  -6   12.84    0.96
   0  -5  -6   14.74    0.99
   0   5   6   12.54    1.18
   0   5   6   12.63    0.99
  -1  -5  -6   34.43    2.67
  -1  -5  -6   40.70    2.63
  -1  -5  -6   33.71    2.67
  -1  -5  -6   38.52    2.64
   1   5   6   38.48    2.65
   1   5   6   37.33    2.79
  -2  -5  -6   20.79    1.58
  -2  -5  -6   21.39    1.51
  -2  -5  -6   22.14    1.51
   2   5   6   18.74    1.71
  -3  -5  -6   50.46    3.44
  -3  -5  -6   41.18    3.53
  -3  -5  -6   51.41    3.51
   3   5   6   51.83    3.48
  -4  -5  -6   29.65    2.23
  -4  -5  -6   29.68    2.12
  -4  -5  -6   32.26    2.28
  -4  -5  -6   29.34    2.12
   4   5   6   29.10    2.18
   4   5   6   27.87    2.35
  -5  -5  -6  168.07   11.38
  -5  -5  -6  163.71   11.38
  -5  -5  -6  179.43   11.54
   5   5   6  160.60   11.44
   5   5   6  147.42   11.56
  -6  -5  -6    8.85    0.75
  -6  -5  -6    7.11    0.98
  -6  -5  -6    8.22    0.74
  -6  -5  -6    8.56    0.78
  -6  -5  -6    6.77    0.95
   6   5   6    6.46    0.85
   6   5   6    7.67    1.06
  -7  -5  -6   18.17    1.74
  -7  -5  -6   21.67    1.57
  -7  -5  -6   20.10    1.55
   7   5   6   19.98    1.68
   7   5   6   22.21    1.90
  -8  -5  -6   31.90    2.35
  -8  -5  -6   31.93    2.52
   8   5   6   32.56    2.46
  -9  -5  -6   38.80    3.12
  -9  -5  -6   43.46    2.97
 -10  -5  -6    0.05    0.29
  10   5   6    1.03    0.43
 -11  -5  -6   43.97    3.32
  11   5   6   50.00    3.41
 -12  -5  -6    0.08    0.17
  12   5   6    0.16    0.31
  -7   6   6    3.05    0.23
  -7   6   6    2.11    0.25
  -7   6   6    2.41    0.31
   6  -6  -6    4.26    0.65
  -6   6   6    4.18    0.33
  -6   6   6    4.09    0.47
  -6   6   6    3.52    0.35
   5  -6  -6    1.35    0.43
  -5   6   6    1.31    0.29
  -5   6   6    1.83    0.22
  -5   6   6    2.24    0.31
  -5   6   6    1.49    0.21
   4  -6  -6   12.34    1.10
   4  -6  -6   11.33    1.16
  -4   6   6   13.77    0.93
  -4   6   6   12.35    1.15
  -4   6   6   11.62    0.90
   3  -6  -6   13.44    1.16
   3  -6  -6   12.69    1.10
  -3   6   6   13.92    1.22
  -3   6   6   13.56    0.99
  -3   6   6   12.79    0.96
   2  -6  -6    1.42    0.31
   2  -6  -6    1.83    0.29
   2  -6  -6    1.69    0.38
  -2   6   6    1.73    0.22
  -2   6   6    1.71    0.46
  -2   6   6    2.30    0.32
   1  -6  -6   42.47    3.07
  -1   6   6   43.56    3.04
  -1   6   6   45.51    3.04
  -1   6   6   40.86    3.17
  -1   6   6   47.88    3.06
  -1   6   6   40.20    3.03
   0  -6  -6    0.52    0.31
   0  -6  -6    0.81    0.26
   0  -6  -6    0.66    0.25
   0   6   6    0.33    0.10
   0   6   6    0.23    0.13
   0   6   6    0.33    0.39
   0   6   6    0.48    0.19
   0   6   6    0.40    0.13
  -1  -6  -6   55.34    4.39
  -1  -6  -6   68.58    4.33
  -1  -6  -6   66.10    4.34
   1   6   6   58.41    4.45
   1   6   6   59.79    4.31
   1   6   6   63.04    4.34
   1   6   6   61.24    4.31
   2   6   6  173.48   12.17
  -3  -6  -6   71.84    5.49
  -3  -6  -6   77.59    5.38
  -3  -6  -6   80.70    5.38
  -4  -6  -6   41.65    3.05
  -4  -6  -6   40.19    2.89
  -4  -6  -6   42.65    3.01
  -4  -6  -6   37.89    2.88
  -4  -6  -6   37.34    2.89
   4   6   6   43.68    2.93
  -5  -6  -6   50.49    3.75
  -5  -6  -6   51.46    3.75
  -5  -6  -6   55.53    3.75
  -5  -6  -6   55.56    3.93
  -5  -6  -6   54.50    3.86
   5   6   6   47.51    3.99
   5   6   6   55.34    3.88
   5   6   6   53.02    3.80
  -6  -6  -6   27.61    1.86
  -6  -6  -6   24.12    2.01
  -6  -6  -6   24.82    1.87
  -6  -6  -6   25.42    2.06
  -6  -6  -6   26.49    1.87
   6   6   6   23.48    1.92
   6   6   6   21.74    2.16
  -7  -6  -6    9.52    0.87
  -7  -6  -6    9.31    1.12
  -7  -6  -6    8.74    0.87
  -7  -6  -6   10.51    0.92
   7   6   6    8.57    0.96
   7   6   6    8.96    1.34
  -8  -6  -6   31.22    2.10
  -8  -6  -6   27.21    2.27
  -8  -6  -6   27.60    2.09
   8   6   6   26.27    2.15
  -9  -6  -6   14.49    1.22
   9   6   6   15.89    1.31
  10   6   6    8.27    0.95
  10   6   6   10.81    0.89
 -11  -6  -6   16.41    1.25
  11   6   6   18.24    1.39
   6  -7  -6   -0.36    0.26
  -6   7   6    0.14    0.08
  -6   7   6    0.00    0.11
  -6   7   6    0.13    0.18
   5  -7  -6    1.26    0.37
  -5   7   6    1.57    0.19
  -5   7   6    1.30    0.18
  -5   7   6    1.07    0.26
   4  -7  -6    5.04    0.77
  -4   7   6    5.89    0.44
  -4   7   6    5.21    0.47
   3  -7  -6   15.80    1.39
   3  -7  -6   16.17    1.33
  -3   7   6   17.28    1.23
  -3   7   6   17.52    1.24
  -3   7   6   17.29    1.21
   2  -7  -6   34.12    2.44
   2  -7  -6   32.60    2.48
  -2   7   6   35.50    2.40
  -2   7   6   34.09    2.40
  -1   7   6   56.42    4.10
  -1   7   6   57.86    4.00
  -1   7   6   60.10    4.00
  -1   7   6   54.45    4.00
  -1   7   6   58.11    4.01
   0  -7  -6    0.52    0.28
   0  -7  -6    0.64    0.27
   0  -7  -6    0.91    0.31
   0   7   6    0.57    0.39
   0   7   6    0.64    0.13
   0   7   6    0.55    0.15
   0   7   6    0.74    0.19
   0   7   6    0.41    0.14
  -1  -7  -6    2.61    0.37
  -1  -7  -6    2.05    0.31
  -1  -7  -6    2.15    0.39
   1   7   6    1.93    0.25
   1   7   6    2.33    0.35
   1   7   6    1.68    0.23
   1   7   6    1.13    0.43
  -2  -7  -6   23.92    1.70
  -2  -7  -6   24.07    1.82
  -2  -7  -6   23.05    1.71
  -2  -7  -6   22.74    1.69
   2   7   6   24.03    1.66
   2   7   6   20.95    1.85
  -3  -7  -6    2.87    0.54
  -3  -7  -6    2.65    0.37
  -3  -7  -6    2.22    0.51
  -3  -7  -6    2.55    0.35
  -3  -7  -6    1.85    0.37
   3   7   6    2.25    0.44
   3   7   6    2.18    0.55
   3   7   6    2.41    0.37
   3   7   6    2.45    0.24
  -4  -7  -6  154.98   11.97
  -4  -7  -6  168.90   11.98
  -4  -7  -6  176.90   12.15
   4   7   6  185.31   12.15
   4   7   6  176.06   11.99
  -5  -7  -6    8.56    1.16
  -5  -7  -6    9.87    0.84
  -5  -7  -6    9.13    1.09
  -5  -7  -6    9.52    0.83
  -5  -7  -6    8.45    0.88
[truncated: 235,019 more chars]
