# Supplementary material for: Supramolecular Assemblies in Mn(II) and Zn(II) Metal-Organic Compounds Involving Phenanthroline and Benzoate: Experimental and Theoretical Studies
Source: Preprints.org preprint supplement (doi:10.20944/preprints202404.1039.v1), 2024-04-16
Supplement: Supplementary file 3 [file supplementary › Supplementary Information.docx]

Supplementary Information


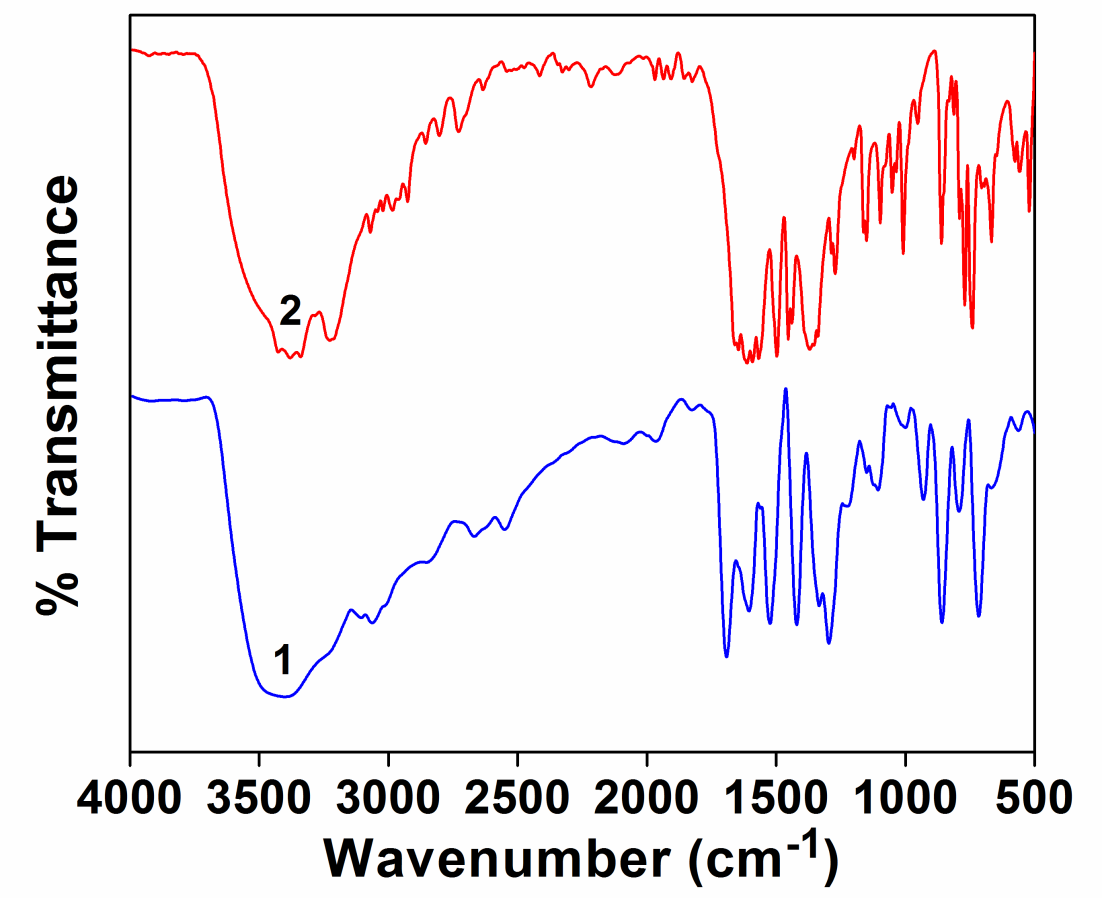


**Figure** **S1.** FT-IR Spectra of compounds **1** and **2**.

*2.3.2 Electronic spectroscopy*

The electronic spectra of the compounds **1** and **2** have been recorded in solid as well as in aqueous state (Figure S2-S3). The electronic spectra of compound **1** does not exhibit any absorption bands in the visible region, as Mn(II) centre (d5 system) has all the electronic transitions from the 6A1g ground state doubly forbidden [1-2]. The peaks at 221 and 271 nm in the solid state UV-Vis-NIR spectrum can be assigned to the π→π* transition of the aromatic ligand [3]. In the aqueous state UV-Vis spectrum these absorption peaks were obtained at 227 and 268 nm respectively [3].


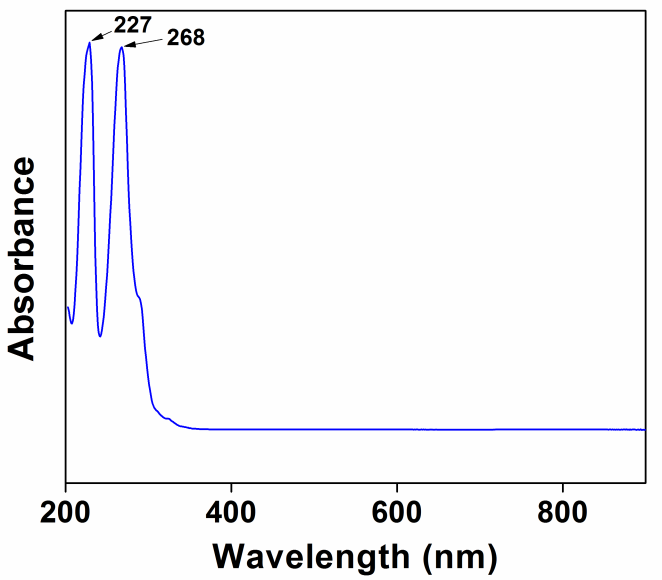

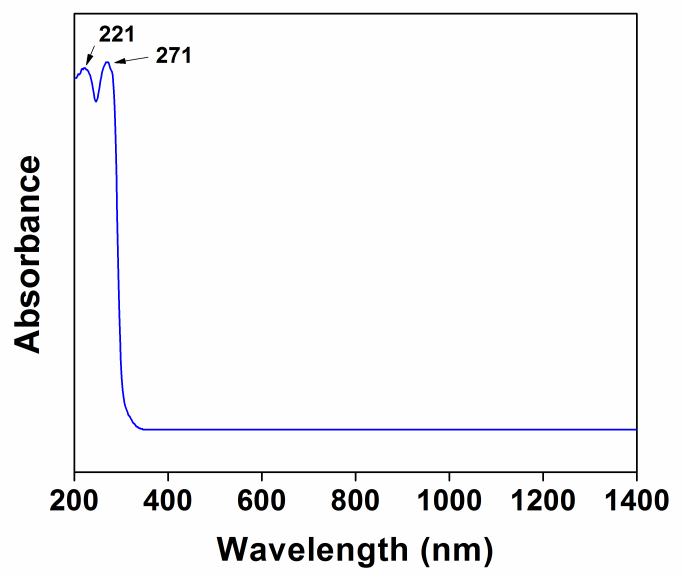


(**a**) (**b**)

**Fig**ure **S2**. (**a**) UV-Vis-NIR spectrum of **1** (**b**) UV-Vis spectrum of compound **1**

The electronic spectra of the diamagnetic Zn(II) compound (**2**) do not show any absorption bands (Figure S3) in the visible region [4-6]. The absorption bands at 225 and 272 nm in the UV-Vis-NIR spectrum of compound **2** can be attributed to the π→π* transition of the aromatic ligands [7]. These absorption peaks are obtained at 222 and 269 nm in the aqueous phase UV-Vis spectrum. The observed similarities in the absorption peaks of compounds **1** and **2** in both the phases suggest that the compounds do not undergo any structural distortion in the aqueous phase [8,9].


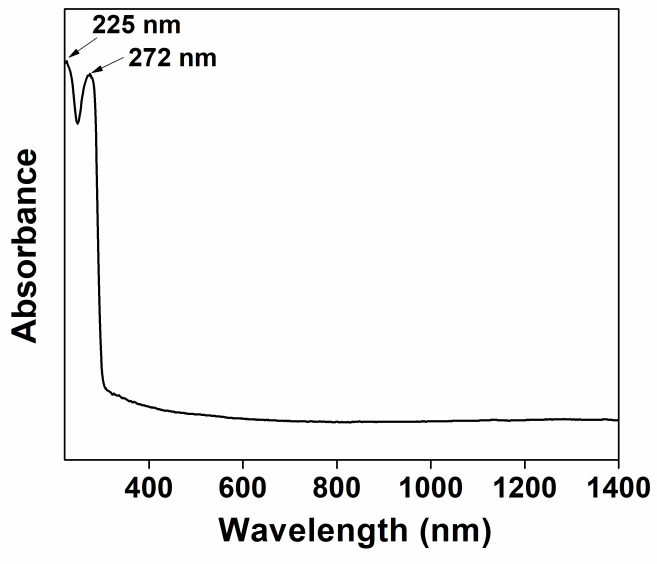

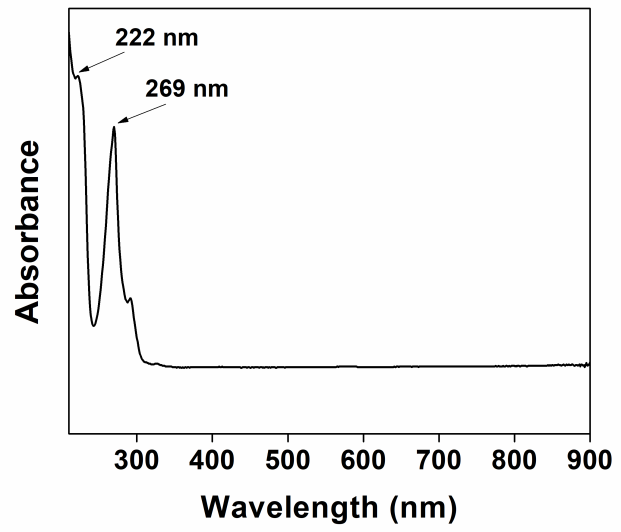


(**a**) (**b**)

**Fig**ure **S3**. (**a**) UV-Vis-NIR spectrum of **2** (**b**) UV-Vis spectra of compound **2**


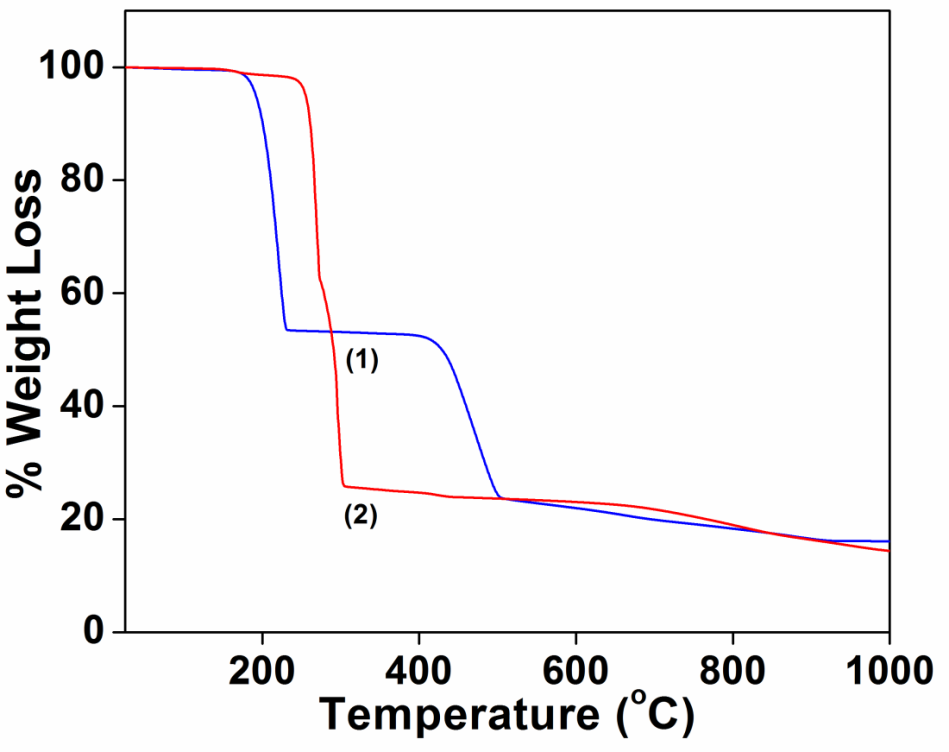


**Figure** **S4**. TG analysis of compounds **1** and **2**.

**Supplementary references**

1. Nashre-ul-Islam, S. M.; Dutta, D.; Guha, A. K.; Bhattacharyya, M. K. An Unusual Werner Type Clathrate of Mn(II) Benzoate Involving Energetically Significant Weak CH⋯C Contacts: A Combined Experimental and Theoretical Study. *J. Mol. Struct.* **2019**, *1175*, 130–138.
2. Aligo, J. A.; Smith, L.; Eglin, J. L.; Pence, L. E. Solution and Solid-State Variation of Cupric Phenanthroline Complexes. *Inorg. Chem.* **2005**, *44*, 4001–4007.
3. Sizova, O. V.; Ershov, A. Y.; Ivanova, N. V.; Shashko, A. D.; Kuteikina-Teplyakova, A. V. Ru(II) Chloro-bis(bipyridyl) Complexes with Substituted Pyridine Ligands: Interpretation of Their Electronic Absorption Spectra. *Russ. J. Coord. Chem.* **2003**, *29*, 494–500.
4. de Araújo, E. L.; Barbosa, H. F. G.; Dockal, E. R.; Cavalheiro, É. T. G. Synthesis, Characterization and Biological Activity of Cu(II), Ni(II), and Zn(II) Complexes of Biopolymeric Schiff Bases of Salicylaldehydes and Chitosan. *Int. J. Biol. Macromol.* **2017**, *95*, 168–176.
5. Ekennia, A. C.; Onwudiwe, D. C.; Osowole, A. A.; Olasunkanmi, L. O.; Ebenso, E. E. Synthesis, Biological, and Quantum Chemical Studies of Zn(II) and Ni(II) Mixed-Ligand Complexes Derived from N,N-Disubstituted Dithiocarbamate and Benzoic Acid. *J. Chem.* **2016** *2016* 5129010-5129025.
6. Kalarani, R.; Sankarganesh, M.; Kumar, G. V.; Kalanithi, M. Synthesis, Spectral, DFT Calculation, Sensor, Antimicrobial and DNA Binding Studies of Co(II), Cu(II), and Zn(II) Metal Complexes with 2-Amino Benzimidazole Schiff Base. *J. Mol. Struct.* **2020**, *1206*, 127725-127740.
7. de Mesquita, M. E.; Junior, S. A.; Oliveira, F. C.; Freire, R. O.; Júnior, N. B. C.; De Sá, G. F. Synthesis, Spectroscopic Studies and Structure Prediction of the New Tb(3-NH2PIC)3.3H2O Complex. *Inorg. Chem. Commun.* **2002**, *5*, 292–295.
8. Ghosh, M.; Majee, A.; Nethaji, M.; Chattopadhyay, T. Syntheses and Characterization of trans-[NiL2(NCS)2][L = 2-(Aminomethyl) Pyridine], trans-[NiL2′(NSC)2][L′ = 2-(2-Aminoethyl) Pyridine] and trans-[NiL2″(NSC)2][L″ = 2-(2-Methylaminoethyl) Pyridine] Complexes: X-ray Single Crystal Structure of trans-[NiL2′(NSC)2][L′ = 2-(2-Aminoethyl) Pyridine]. *Inorg. Chim. Acta* **2009**, *362*, 2052–2055.
9. Yenikaya, C.; Poyraz, M.; Sarı, M.; Demirci, F.; İlkimen, H.; Büyükgüngör, O. Synthesis, Characterization and Biological Evaluation of a Novel Cu(II) Complex with the Mixed Ligands 2,6-Pyridinedicarboxylic Acid and 2-Aminopyridine. *Polyhedron* **2009**, *28*, 3526–3532.
