# Supplementary material for: Supramolecular Assemblies in Mn(II) and Zn(II) Metal-Organic Compounds Involving Phenanthroline and Benzoate: Experimental and Theoretical Studies
Source: Preprints.org preprint supplement (doi:10.20944/preprints202404.1039.v1), 2024-04-16
Supplement: Supplementary file 3 [file supplementary › Zn_4-MeBz_2-AmPy.cif]

 
data_shelx
 
_audit_creation_method            'SHELXL-2018/3'
_shelx_SHELXL_version_number      '2018/3'
_chemical_name_systematic         ?
_chemical_name_common             ?
_chemical_melting_point           ?
_chemical_formula_moiety          ?
_chemical_formula_sum
 'C26 H26 N4 O4 Zn' 
_chemical_formula_weight          523.88

loop_
 _atom_type_symbol
 _atom_type_description
 _atom_type_scat_dispersion_real
 _atom_type_scat_dispersion_imag
 _atom_type_scat_source
 'C'  'C'   0.0181   0.0091
 'International Tables Vol C Tables 4.2.6.8 and 6.1.1.4'
 'H'  'H'   0.0000   0.0000
 'International Tables Vol C Tables 4.2.6.8 and 6.1.1.4'
 'N'  'N'   0.0311   0.0180
 'International Tables Vol C Tables 4.2.6.8 and 6.1.1.4'
 'O'  'O'   0.0492   0.0322
 'International Tables Vol C Tables 4.2.6.8 and 6.1.1.4'
 'Zn'  'Zn'  -1.5491   0.6778
 'International Tables Vol C Tables 4.2.6.8 and 6.1.1.4'
 
_space_group_crystal_system       monoclinic
_space_group_IT_number            9
_space_group_name_H-M_alt         'C c'
_space_group_name_Hall            'C -2yc'
 
_shelx_space_group_comment
;
The symmetry employed for this shelxl refinement is uniquely defined
by the following loop, which should always be used as a source of
symmetry information in preference to the above space-group names.
They are only intended as comments.
;
 
loop_
 _space_group_symop_operation_xyz
 'x, y, z'
 'x, -y, z+1/2'
 'x+1/2, y+1/2, z'
 'x+1/2, -y+1/2, z+1/2'
 
_cell_length_a                    9.9347(14)
_cell_length_b                    23.521(3)
_cell_length_c                    10.5889(15)
_cell_angle_alpha                 90
_cell_angle_beta                  93.195(4)
_cell_angle_gamma                 90
_cell_volume                      2470.5(6)
_cell_formula_units_Z             4
_cell_measurement_temperature     100(2)
_cell_measurement_reflns_used     9460
_cell_measurement_theta_min       4.84
_cell_measurement_theta_max       68.29
 
_exptl_crystal_description        prism
_exptl_crystal_colour             colourless
_exptl_crystal_density_meas       ?
_exptl_crystal_density_method     ?
_exptl_crystal_density_diffrn     1.409          
_exptl_crystal_F_000              1088
_exptl_transmission_factor_min    ?
_exptl_transmission_factor_max    ?
_exptl_crystal_size_max           0.380
_exptl_crystal_size_mid           0.310
_exptl_crystal_size_min           0.150
_exptl_absorpt_coefficient_mu     1.709
_shelx_estimated_absorpt_T_min    0.563
_shelx_estimated_absorpt_T_max    0.784
_exptl_absorpt_correction_type    multi-scan
_exptl_absorpt_correction_T_min   0.5372
_exptl_absorpt_correction_T_max   0.7531
_exptl_absorpt_process_details    
;
SADABS-2016/2 (Bruker,2016) was used for absorption correction.
wR2(int) was 0.1534 before and 0.0953 after correction.
The Ratio of minimum to maximum transmission is 0.7133.
The \l/2 correction factor is Not present.
;
_exptl_absorpt_special_details    ?
_diffrn_ambient_temperature       100(2)
_diffrn_radiation_wavelength      1.54178
_diffrn_radiation_type            CuK\a
_diffrn_source                    ?
_diffrn_measurement_device_type   'Bruker D8 Venture'
_diffrn_measurement_method        '\f and \w scans'
_diffrn_detector_area_resol_mean  ?
_diffrn_reflns_number             26679
_diffrn_reflns_av_unetI/netI      0.0362
_diffrn_reflns_av_R_equivalents   0.0443
_diffrn_reflns_limit_h_min        -11
_diffrn_reflns_limit_h_max        11
_diffrn_reflns_limit_k_min        -28
_diffrn_reflns_limit_k_max        28
_diffrn_reflns_limit_l_min        -12
_diffrn_reflns_limit_l_max        12
_diffrn_reflns_theta_min          4.838
_diffrn_reflns_theta_max          68.452
_diffrn_reflns_theta_full         67.679
_diffrn_measured_fraction_theta_max   0.985
_diffrn_measured_fraction_theta_full  0.989
_diffrn_reflns_Laue_measured_fraction_max    0.985
_diffrn_reflns_Laue_measured_fraction_full   0.989
_diffrn_reflns_point_group_measured_fraction_max   0.930
_diffrn_reflns_point_group_measured_fraction_full  0.934
_reflns_number_total              4216
_reflns_number_gt                 4208
_reflns_threshold_expression      'I > 2\s(I)'
_reflns_Friedel_coverage          0.881
_reflns_Friedel_fraction_max      0.874
_reflns_Friedel_fraction_full     0.879
 
_reflns_special_details
;
 Reflections were merged by SHELXL according to the crystal
 class for the calculation of statistics and refinement.
 
 _reflns_Friedel_fraction is defined as the number of unique
 Friedel pairs measured divided by the number that would be
 possible theoretically, ignoring centric projections and
 systematic absences. Completness statistics refer to single and
 composite reflections containing twin component 1 only.
;
 
_computing_data_collection        ?
_computing_cell_refinement        ?
_computing_data_reduction         ?
_computing_structure_solution     ?
_computing_structure_refinement 'SHELXL-2018/3 (Sheldrick, 2018)'
_computing_molecular_graphics     ?
_computing_publication_material   ?
_refine_special_details
;
 Refined as a 2-component inversion twin.
;
_refine_ls_structure_factor_coef  Fsqd
_refine_ls_matrix_type            full
_refine_ls_weighting_scheme       calc
_refine_ls_weighting_details
'w=1/[\s^2^(Fo^2^)+(0.0624P)^2^+2.2543P] where P=(Fo^2^+2Fc^2^)/3'
_atom_sites_solution_primary      ?
_atom_sites_solution_secondary    ?
_atom_sites_solution_hydrogens    geom
_refine_ls_hydrogen_treatment     constr
_refine_ls_extinction_method      none
_refine_ls_extinction_coef        .
_refine_ls_abs_structure_details
;
 Refined as an inversion twin.
;
_refine_ls_abs_structure_Flack    0.13(2)
_chemical_absolute_configuration  ?
_refine_ls_number_reflns          4216
_refine_ls_number_parameters      319
_refine_ls_number_restraints      2
_refine_ls_R_factor_all           0.0281
_refine_ls_R_factor_gt            0.0281
_refine_ls_wR_factor_ref          0.0725
_refine_ls_wR_factor_gt           0.0725
_refine_ls_goodness_of_fit_ref    0.831
_refine_ls_restrained_S_all       0.831
_refine_ls_shift/su_max           0.001
_refine_ls_shift/su_mean          0.000
 
loop_
 _atom_site_label
 _atom_site_type_symbol
 _atom_site_fract_x
 _atom_site_fract_y
 _atom_site_fract_z
 _atom_site_U_iso_or_equiv
 _atom_site_adp_type
 _atom_site_occupancy
 _atom_site_site_symmetry_order  
 _atom_site_calc_flag
 _atom_site_refinement_flags_posn
 _atom_site_refinement_flags_adp
 _atom_site_refinement_flags_occupancy
 _atom_site_disorder_assembly
 _atom_site_disorder_group
Zn1 Zn 0.57109(3) 0.69967(2) 0.52409(3) 0.02010(13) Uani 1 1 d . . . . .
O1 O 0.5590(3) 0.62744(14) 0.4067(2) 0.0491(8) Uani 1 1 d . . . . .
O2 O 0.7480(3) 0.67481(10) 0.4055(2) 0.0424(7) Uani 1 1 d . . . . .
C1 C 0.6771(4) 0.63275(16) 0.3705(3) 0.0351(8) Uani 1 1 d . . . . .
C2 C 0.7324(3) 0.58808(13) 0.2872(3) 0.0243(6) Uani 1 1 d . . . . .
C3 C 0.6621(3) 0.53834(14) 0.2606(3) 0.0284(6) Uani 1 1 d . . . . .
H3 H 0.574982 0.533197 0.291611 0.034 Uiso 1 1 calc R U . . .
C4 C 0.7181(3) 0.49583(13) 0.1889(3) 0.0278(6) Uani 1 1 d . . . . .
H4 H 0.668779 0.461850 0.171603 0.033 Uiso 1 1 calc R U . . .
C5 C 0.8452(3) 0.50230(12) 0.1422(3) 0.0231(6) Uani 1 1 d . . . . .
C6 C 0.9146(3) 0.55278(13) 0.1674(3) 0.0235(6) Uani 1 1 d . . . . .
H6 H 1.000864 0.558239 0.134816 0.028 Uiso 1 1 calc R U . . .
C7 C 0.8598(3) 0.59517(12) 0.2394(3) 0.0247(6) Uani 1 1 d . . . . .
H7 H 0.908878 0.629225 0.256401 0.030 Uiso 1 1 calc R U . . .
C8 C 0.9081(4) 0.45617(14) 0.0664(3) 0.0311(7) Uani 1 1 d . . . . .
H8A H 0.909887 0.468153 -0.022172 0.047 Uiso 1 1 calc R U . . .
H8C H 0.854975 0.421229 0.071553 0.047 Uiso 1 1 calc R U . . .
H8B H 1.000375 0.449130 0.100332 0.047 Uiso 1 1 calc R U . . .
O3 O 0.6546(2) 0.77563(8) 0.56939(19) 0.0237(4) Uani 1 1 d . . . . .
O4 O 0.5707(2) 0.78723(9) 0.3731(2) 0.0243(4) Uani 1 1 d . . . . .
C9 C 0.6305(3) 0.80639(12) 0.4707(3) 0.0190(6) Uani 1 1 d . . . . .
C10 C 0.6751(3) 0.86703(12) 0.4772(3) 0.0195(5) Uani 1 1 d . . . . .
C15 C 0.7501(3) 0.88772(13) 0.5823(3) 0.0230(6) Uani 1 1 d . . . . .
H15 H 0.776379 0.862708 0.649674 0.028 Uiso 1 1 calc R U . . .
C14 C 0.7868(3) 0.94470(14) 0.5894(3) 0.0310(7) Uani 1 1 d . . . . .
H14 H 0.838480 0.958202 0.661424 0.037 Uiso 1 1 calc R U . . .
C13 C 0.7486(3) 0.98221(13) 0.4922(4) 0.0338(8) Uani 1 1 d . . . . .
C12 C 0.6736(4) 0.96102(14) 0.3875(4) 0.0326(7) Uani 1 1 d . . . . .
H12 H 0.646397 0.986078 0.320557 0.039 Uiso 1 1 calc R U . . .
C11 C 0.6382(3) 0.90450(13) 0.3791(3) 0.0249(6) Uani 1 1 d . . . . .
H11 H 0.588323 0.890932 0.306127 0.030 Uiso 1 1 calc R U . . .
C16 C 0.7874(5) 1.04409(17) 0.5003(6) 0.0536(12) Uani 1 1 d . . . . .
H16B H 0.878980 1.048904 0.471961 0.080 Uiso 1 1 calc R U . . .
H16C H 0.784292 1.057077 0.588022 0.080 Uiso 1 1 calc R U . . .
H16A H 0.724303 1.066531 0.446169 0.080 Uiso 1 1 calc R U . . .
N1 N 0.3644(3) 0.71172(11) 0.5181(3) 0.0232(5) Uani 1 1 d . . . . .
N2 N 0.3647(3) 0.75561(12) 0.7128(3) 0.0343(6) Uani 1 1 d . . . . .
H2A H 0.452620 0.750759 0.721020 0.041 Uiso 1 1 calc R U . . .
H2B H 0.322240 0.772476 0.773158 0.041 Uiso 1 1 calc R U . . .
C21 C 0.2953(3) 0.73723(12) 0.6078(3) 0.0238(6) Uani 1 1 d . . . . .
C20 C 0.1544(3) 0.74407(15) 0.5943(3) 0.0315(7) Uani 1 1 d . . . . .
H20 H 0.107055 0.761710 0.659184 0.038 Uiso 1 1 calc R U . . .
C19 C 0.0867(4) 0.72502(19) 0.4866(3) 0.0386(8) Uani 1 1 d . . . . .
H19 H -0.008392 0.729354 0.476180 0.046 Uiso 1 1 calc R U . . .
C18 C 0.1581(4) 0.69896(14) 0.3911(3) 0.0324(8) Uani 1 1 d . . . . .
H18 H 0.112879 0.685488 0.315555 0.039 Uiso 1 1 calc R U . . .
C17 C 0.2953(4) 0.69362(13) 0.4107(4) 0.0269(7) Uani 1 1 d . . . . .
H17 H 0.344481 0.676488 0.346285 0.032 Uiso 1 1 calc R U . . .
N3 N 0.6153(2) 0.66152(10) 0.6978(2) 0.0193(5) Uani 1 1 d . . . . .
N4 N 0.8382(3) 0.69088(11) 0.7071(3) 0.0256(6) Uani 1 1 d . . . . .
H4A H 0.824743 0.706566 0.631978 0.031 Uiso 1 1 calc R U . . .
H4B H 0.918186 0.692831 0.746986 0.031 Uiso 1 1 calc R U . . .
C26 C 0.7368(3) 0.66394(11) 0.7607(3) 0.0196(5) Uani 1 1 d . . . . .
C25 C 0.7583(3) 0.63726(12) 0.8802(3) 0.0235(6) Uani 1 1 d . . . . .
H25 H 0.844234 0.639045 0.924147 0.028 Uiso 1 1 calc R U . . .
C24 C 0.6547(4) 0.60902(14) 0.9314(3) 0.0299(7) Uani 1 1 d . . . . .
H24 H 0.668119 0.591167 1.011632 0.036 Uiso 1 1 calc R U . . .
C23 C 0.5283(3) 0.60631(13) 0.8657(3) 0.0298(7) Uani 1 1 d . . . . .
H23 H 0.455027 0.586766 0.899976 0.036 Uiso 1 1 calc R U . . .
C22 C 0.5141(3) 0.63264(12) 0.7511(3) 0.0239(6) Uani 1 1 d . . . . .
H22 H 0.428882 0.630747 0.705942 0.029 Uiso 1 1 calc R U . . .
 
loop_
 _atom_site_aniso_label
 _atom_site_aniso_U_11
 _atom_site_aniso_U_22
 _atom_site_aniso_U_33
 _atom_site_aniso_U_23
 _atom_site_aniso_U_13
 _atom_site_aniso_U_12
Zn1 0.0242(2) 0.01772(18) 0.01780(19) -0.00014(15) -0.00388(12) -0.00079(14)
O1 0.0354(14) 0.082(2) 0.0302(13) -0.0146(13) 0.0019(11) 0.0248(14)
O2 0.083(2) 0.0226(12) 0.0232(11) 0.0032(9) 0.0133(12) 0.0138(12)
C1 0.045(2) 0.043(2) 0.0169(15) 0.0056(13) 0.0006(14) 0.0232(16)
C2 0.0268(14) 0.0302(15) 0.0159(13) 0.0029(11) 0.0002(11) 0.0086(12)
C3 0.0214(14) 0.0390(17) 0.0251(15) 0.0061(13) 0.0049(12) 0.0005(12)
C4 0.0300(16) 0.0269(14) 0.0266(15) 0.0036(12) 0.0017(12) -0.0076(12)
C5 0.0290(15) 0.0220(13) 0.0180(13) 0.0015(11) -0.0001(12) 0.0008(12)
C6 0.0221(14) 0.0256(15) 0.0233(15) 0.0005(12) 0.0060(11) -0.0021(12)
C7 0.0309(15) 0.0210(13) 0.0224(14) -0.0006(11) 0.0021(11) -0.0016(12)
C8 0.0409(18) 0.0256(15) 0.0269(16) -0.0058(12) 0.0028(13) 0.0001(13)
O3 0.0334(11) 0.0172(9) 0.0198(10) 0.0027(8) -0.0053(8) -0.0014(8)
O4 0.0271(11) 0.0259(9) 0.0192(10) -0.0044(8) -0.0054(8) 0.0035(9)
C9 0.0190(14) 0.0210(13) 0.0171(14) -0.0004(10) 0.0018(11) 0.0037(10)
C10 0.0208(13) 0.0211(14) 0.0168(13) -0.0012(10) 0.0044(10) 0.0030(10)
C15 0.0229(13) 0.0261(14) 0.0202(13) -0.0032(11) 0.0042(10) 0.0007(11)
C14 0.0289(15) 0.0338(17) 0.0312(17) -0.0120(13) 0.0100(13) -0.0055(13)
C13 0.0312(16) 0.0207(15) 0.051(2) -0.0021(13) 0.0204(15) -0.0020(12)
C12 0.0319(17) 0.0262(16) 0.0407(19) 0.0107(14) 0.0115(15) 0.0039(13)
C11 0.0255(15) 0.0246(14) 0.0248(15) 0.0061(12) 0.0027(11) 0.0021(11)
C16 0.054(3) 0.0259(18) 0.084(3) -0.0066(19) 0.025(2) -0.0122(17)
N1 0.0256(13) 0.0208(11) 0.0227(13) -0.0004(10) -0.0042(10) 0.0006(10)
N2 0.0367(15) 0.0338(14) 0.0318(14) -0.0125(12) -0.0044(12) 0.0044(12)
C21 0.0331(15) 0.0177(13) 0.0203(13) 0.0036(11) -0.0010(12) 0.0001(11)
C20 0.0307(16) 0.0438(18) 0.0203(14) 0.0051(13) 0.0051(12) 0.0026(14)
C19 0.0271(17) 0.065(2) 0.0239(16) 0.0049(15) 0.0010(13) -0.0011(16)
C18 0.0268(18) 0.048(2) 0.0216(17) 0.0016(12) -0.0019(14) -0.0028(13)
C17 0.0283(17) 0.0302(15) 0.0216(16) -0.0041(12) -0.0042(13) -0.0005(12)
N3 0.0213(11) 0.0173(11) 0.0191(11) 0.0012(9) -0.0013(9) -0.0004(9)
N4 0.0228(13) 0.0306(12) 0.0227(14) 0.0089(11) -0.0048(11) -0.0051(10)
C26 0.0242(13) 0.0171(12) 0.0177(13) -0.0019(10) 0.0012(10) 0.0012(10)
C25 0.0255(14) 0.0261(14) 0.0186(14) 0.0027(11) -0.0018(11) 0.0042(11)
C24 0.0366(17) 0.0304(16) 0.0231(15) 0.0089(12) 0.0058(13) 0.0065(13)
C23 0.0269(16) 0.0287(15) 0.0346(17) 0.0083(13) 0.0094(13) 0.0010(12)
C22 0.0213(14) 0.0206(13) 0.0298(16) 0.0032(12) 0.0002(12) 0.0000(11)
 
_geom_special_details
;
 All esds (except the esd in the dihedral angle between two l.s. planes)
 are estimated using the full covariance matrix.  The cell esds are taken
 into account individually in the estimation of esds in distances, angles
 and torsion angles; correlations between esds in cell parameters are only
 used when they are defined by crystal symmetry.  An approximate (isotropic)
 treatment of cell esds is used for estimating esds involving l.s. planes.
;
 
loop_
 _geom_bond_atom_site_label_1
 _geom_bond_atom_site_label_2
 _geom_bond_distance
 _geom_bond_site_symmetry_2
 _geom_bond_publ_flag
Zn1 O3 2.016(2) . ?
Zn1 N1 2.070(3) . ?
Zn1 N3 2.071(2) . ?
Zn1 O1 2.105(3) . ?
Zn1 O2 2.292(3) . ?
Zn1 C1 2.535(3) . ?
O1 C1 1.262(5) . ?
O2 C1 1.258(5) . ?
C1 C2 1.496(4) . ?
C2 C3 1.383(5) . ?
C2 C7 1.399(4) . ?
C3 C4 1.391(5) . ?
C3 H3 0.9500 . ?
C4 C5 1.390(5) . ?
C4 H4 0.9500 . ?
C5 C6 1.391(4) . ?
C5 C8 1.506(4) . ?
C6 C7 1.385(4) . ?
C6 H6 0.9500 . ?
C7 H7 0.9500 . ?
C8 H8A 0.9800 . ?
C8 H8C 0.9800 . ?
C8 H8B 0.9800 . ?
O3 C9 1.283(4) . ?
O4 C9 1.247(4) . ?
C9 C10 1.494(4) . ?
C10 C15 1.392(4) . ?
C10 C11 1.396(4) . ?
C15 C14 1.390(5) . ?
C15 H15 0.9500 . ?
C14 C13 1.392(5) . ?
C14 H14 0.9500 . ?
C13 C12 1.392(6) . ?
C13 C16 1.507(5) . ?
C12 C11 1.377(5) . ?
C12 H12 0.9500 . ?
C11 H11 0.9500 . ?
C16 H16B 0.9800 . ?
C16 H16C 0.9800 . ?
C16 H16A 0.9800 . ?
N1 C21 1.344(4) . ?
N1 C17 1.364(5) . ?
N2 C21 1.347(4) . ?
N2 H2A 0.8800 . ?
N2 H2B 0.8800 . ?
C21 C20 1.408(5) . ?
C20 C19 1.367(5) . ?
C20 H20 0.9500 . ?
C19 C18 1.408(5) . ?
C19 H19 0.9500 . ?
C18 C17 1.373(5) . ?
C18 H18 0.9500 . ?
C17 H17 0.9500 . ?
N3 C26 1.347(4) . ?
N3 C22 1.362(4) . ?
N4 C26 1.343(4) . ?
N4 H4A 0.8800 . ?
N4 H4B 0.8800 . ?
C26 C25 1.418(4) . ?
C25 C24 1.363(5) . ?
C25 H25 0.9500 . ?
C24 C23 1.403(5) . ?
C24 H24 0.9500 . ?
C23 C22 1.363(5) . ?
C23 H23 0.9500 . ?
C22 H22 0.9500 . ?
 
loop_
 _geom_angle_atom_site_label_1
 _geom_angle_atom_site_label_2
 _geom_angle_atom_site_label_3
 _geom_angle
 _geom_angle_site_symmetry_1
 _geom_angle_site_symmetry_3
 _geom_angle_publ_flag
O3 Zn1 N1 106.26(9) . . ?
O3 Zn1 N3 96.24(9) . . ?
N1 Zn1 N3 104.32(10) . . ?
O3 Zn1 O1 149.88(11) . . ?
N1 Zn1 O1 93.92(10) . . ?
N3 Zn1 O1 100.20(11) . . ?
O3 Zn1 O2 92.21(9) . . ?
N1 Zn1 O2 143.86(11) . . ?
N3 Zn1 O2 104.17(9) . . ?
O1 Zn1 O2 59.39(10) . . ?
O3 Zn1 C1 121.51(12) . . ?
N1 Zn1 C1 120.83(12) . . ?
N3 Zn1 C1 103.04(10) . . ?
O1 Zn1 C1 29.75(13) . . ?
O2 Zn1 C1 29.67(12) . . ?
C1 O1 Zn1 94.4(3) . . ?
C1 O2 Zn1 85.9(2) . . ?
O2 C1 O1 120.2(3) . . ?
O2 C1 C2 120.6(3) . . ?
O1 C1 C2 119.2(4) . . ?
O2 C1 Zn1 64.41(19) . . ?
O1 C1 Zn1 55.88(19) . . ?
C2 C1 Zn1 173.7(3) . . ?
C3 C2 C7 119.0(3) . . ?
C3 C2 C1 121.1(3) . . ?
C7 C2 C1 119.9(3) . . ?
C2 C3 C4 120.4(3) . . ?
C2 C3 H3 119.8 . . ?
C4 C3 H3 119.8 . . ?
C3 C4 C5 121.0(3) . . ?
C3 C4 H4 119.5 . . ?
C5 C4 H4 119.5 . . ?
C6 C5 C4 118.4(3) . . ?
C6 C5 C8 120.1(3) . . ?
C4 C5 C8 121.5(3) . . ?
C5 C6 C7 120.9(3) . . ?
C5 C6 H6 119.6 . . ?
C7 C6 H6 119.6 . . ?
C2 C7 C6 120.3(3) . . ?
C2 C7 H7 119.8 . . ?
C6 C7 H7 119.8 . . ?
C5 C8 H8A 109.5 . . ?
C5 C8 H8C 109.5 . . ?
H8A C8 H8C 109.5 . . ?
C5 C8 H8B 109.5 . . ?
H8A C8 H8B 109.5 . . ?
H8C C8 H8B 109.5 . . ?
C9 O3 Zn1 104.50(18) . . ?
O4 C9 O3 122.0(3) . . ?
O4 C9 C10 120.7(3) . . ?
O3 C9 C10 117.3(3) . . ?
C15 C10 C11 118.7(3) . . ?
C15 C10 C9 121.0(3) . . ?
C11 C10 C9 120.2(3) . . ?
C10 C15 C14 120.5(3) . . ?
C10 C15 H15 119.7 . . ?
C14 C15 H15 119.7 . . ?
C15 C14 C13 120.7(3) . . ?
C15 C14 H14 119.6 . . ?
C13 C14 H14 119.6 . . ?
C12 C13 C14 118.2(3) . . ?
C12 C13 C16 121.0(4) . . ?
C14 C13 C16 120.8(4) . . ?
C13 C12 C11 121.4(3) . . ?
C13 C12 H12 119.3 . . ?
C11 C12 H12 119.3 . . ?
C12 C11 C10 120.4(3) . . ?
C12 C11 H11 119.8 . . ?
C10 C11 H11 119.8 . . ?
C13 C16 H16B 109.5 . . ?
C13 C16 H16C 109.5 . . ?
H16B C16 H16C 109.5 . . ?
C13 C16 H16A 109.5 . . ?
H16B C16 H16A 109.5 . . ?
H16C C16 H16A 109.5 . . ?
C21 N1 C17 118.4(3) . . ?
C21 N1 Zn1 125.8(2) . . ?
C17 N1 Zn1 115.8(2) . . ?
C21 N2 H2A 120.0 . . ?
C21 N2 H2B 120.0 . . ?
H2A N2 H2B 120.0 . . ?
N2 C21 N1 117.9(3) . . ?
N2 C21 C20 120.5(3) . . ?
N1 C21 C20 121.6(3) . . ?
C19 C20 C21 119.2(3) . . ?
C19 C20 H20 120.4 . . ?
C21 C20 H20 120.4 . . ?
C20 C19 C18 119.8(3) . . ?
C20 C19 H19 120.1 . . ?
C18 C19 H19 120.1 . . ?
C17 C18 C19 117.9(3) . . ?
C17 C18 H18 121.1 . . ?
C19 C18 H18 121.1 . . ?
N1 C17 C18 123.1(3) . . ?
N1 C17 H17 118.4 . . ?
C18 C17 H17 118.4 . . ?
C26 N3 C22 118.5(2) . . ?
C26 N3 Zn1 124.11(19) . . ?
C22 N3 Zn1 117.37(19) . . ?
C26 N4 H4A 120.0 . . ?
C26 N4 H4B 120.0 . . ?
H4A N4 H4B 120.0 . . ?
N4 C26 N3 118.9(3) . . ?
N4 C26 C25 120.4(3) . . ?
N3 C26 C25 120.6(3) . . ?
C24 C25 C26 119.4(3) . . ?
C24 C25 H25 120.3 . . ?
C26 C25 H25 120.3 . . ?
C25 C24 C23 120.0(3) . . ?
C25 C24 H24 120.0 . . ?
C23 C24 H24 120.0 . . ?
C22 C23 C24 117.8(3) . . ?
C22 C23 H23 121.1 . . ?
C24 C23 H23 121.1 . . ?
C23 C22 N3 123.6(3) . . ?
C23 C22 H22 118.2 . . ?
N3 C22 H22 118.2 . . ?
 
loop_
 _geom_torsion_atom_site_label_1
 _geom_torsion_atom_site_label_2
 _geom_torsion_atom_site_label_3
 _geom_torsion_atom_site_label_4
 _geom_torsion
 _geom_torsion_site_symmetry_1
 _geom_torsion_site_symmetry_2
 _geom_torsion_site_symmetry_3
 _geom_torsion_site_symmetry_4
 _geom_torsion_publ_flag
Zn1 O2 C1 O1 3.4(3) . . . . ?
Zn1 O2 C1 C2 -175.7(3) . . . . ?
Zn1 O1 C1 O2 -3.7(3) . . . . ?
Zn1 O1 C1 C2 175.4(2) . . . . ?
O2 C1 C2 C3 172.0(3) . . . . ?
O1 C1 C2 C3 -7.1(5) . . . . ?
O2 C1 C2 C7 -5.1(5) . . . . ?
O1 C1 C2 C7 175.8(3) . . . . ?
C7 C2 C3 C4 0.8(4) . . . . ?
C1 C2 C3 C4 -176.3(3) . . . . ?
C2 C3 C4 C5 -0.1(5) . . . . ?
C3 C4 C5 C6 -0.9(4) . . . . ?
C3 C4 C5 C8 178.9(3) . . . . ?
C4 C5 C6 C7 1.3(4) . . . . ?
C8 C5 C6 C7 -178.6(3) . . . . ?
C3 C2 C7 C6 -0.4(4) . . . . ?
C1 C2 C7 C6 176.7(3) . . . . ?
C5 C6 C7 C2 -0.6(5) . . . . ?
Zn1 O3 C9 O4 -1.9(3) . . . . ?
Zn1 O3 C9 C10 177.22(19) . . . . ?
O4 C9 C10 C15 -175.5(3) . . . . ?
O3 C9 C10 C15 5.4(4) . . . . ?
O4 C9 C10 C11 6.6(4) . . . . ?
O3 C9 C10 C11 -172.4(3) . . . . ?
C11 C10 C15 C14 0.3(4) . . . . ?
C9 C10 C15 C14 -177.6(3) . . . . ?
C10 C15 C14 C13 0.4(4) . . . . ?
C15 C14 C13 C12 -0.4(5) . . . . ?
C15 C14 C13 C16 179.5(3) . . . . ?
C14 C13 C12 C11 -0.3(5) . . . . ?
C16 C13 C12 C11 179.7(3) . . . . ?
C13 C12 C11 C10 1.1(5) . . . . ?
C15 C10 C11 C12 -1.1(4) . . . . ?
C9 C10 C11 C12 176.9(3) . . . . ?
C17 N1 C21 N2 -179.2(3) . . . . ?
Zn1 N1 C21 N2 -1.7(4) . . . . ?
C17 N1 C21 C20 1.7(4) . . . . ?
Zn1 N1 C21 C20 179.2(2) . . . . ?
N2 C21 C20 C19 180.0(3) . . . . ?
N1 C21 C20 C19 -0.9(5) . . . . ?
C21 C20 C19 C18 0.0(5) . . . . ?
C20 C19 C18 C17 0.1(5) . . . . ?
C21 N1 C17 C18 -1.6(5) . . . . ?
Zn1 N1 C17 C18 -179.4(3) . . . . ?
C19 C18 C17 N1 0.7(5) . . . . ?
C22 N3 C26 N4 178.0(3) . . . . ?
Zn1 N3 C26 N4 -2.5(3) . . . . ?
C22 N3 C26 C25 -0.3(4) . . . . ?
Zn1 N3 C26 C25 179.2(2) . . . . ?
N4 C26 C25 C24 -178.4(3) . . . . ?
N3 C26 C25 C24 -0.1(4) . . . . ?
C26 C25 C24 C23 0.3(5) . . . . ?
C25 C24 C23 C22 -0.1(5) . . . . ?
C24 C23 C22 N3 -0.4(5) . . . . ?
C26 N3 C22 C23 0.6(4) . . . . ?
Zn1 N3 C22 C23 -178.9(2) . . . . ?
 
loop_
 _geom_hbond_atom_site_label_D 
 _geom_hbond_atom_site_label_H 
 _geom_hbond_atom_site_label_A 
 _geom_hbond_distance_DH 
 _geom_hbond_distance_HA 
 _geom_hbond_distance_DA 
 _geom_hbond_angle_DHA 
 _geom_hbond_site_symmetry_A 
 _geom_hbond_publ_flag
N2 H2B O2  0.88 2.04 2.907(4) 168.4 4_465 yes
N4 H4A O3  0.88 2.41 3.022(3) 126.9 . yes
 
_refine_diff_density_max    0.725
_refine_diff_density_min   -0.377
_refine_diff_density_rms    0.084

_shelx_res_file
;
TITL 1_a.res in Cc
    shelx.res
    created by SHELXL-2018/3 at 12:16:16 on 03-Sep-2023
CELL  1.54178   9.9347  23.5207  10.5889   90.000   93.195   90.000
ZERR     4.00   0.0014   0.0032   0.0015    0.000    0.004    0.000
LATT  -7
SYMM    X, - Y, 1/2 + Z
SFAC  C    H    N    O    ZN
UNIT  104 104 16 16 4
MERG   2
OMIT    -1   5   2
OMIT    -2  12   3
OMIT    -1  11   2
OMIT    -1   9   3
OMIT     0   4   3
OMIT     0   4   0
OMIT    -1  -7   0
OMIT    -4   2  12
OMIT    -1   7   0
TWIN
EQIV $1 -0.5+X,1.5-Y,0.5+Z
EQIV $2 0.5+X,1.5-Y,0.5+Z
HTAB  N2 O2_$1
HTAB  N4 O3
MORE -1
FMAP   2
PLAN    1
SIZE     0.150   0.310   0.380
ACTA
BOND
BOND   $H
CONF
LIST   4
L.S.  10
TEMP  -173.15
WGHT    0.062400    2.254300
BASF   0.13067
FVAR       0.36196
ZN1   5    0.571088    0.699669    0.524091    11.00000    0.02422    0.01772 =
         0.01780   -0.00014   -0.00388   -0.00079
O1    4    0.558960    0.627443    0.406692    11.00000    0.03537    0.08164 =
         0.03020   -0.01461    0.00187    0.02480
O2    4    0.747965    0.674811    0.405508    11.00000    0.08251    0.02257 =
         0.02323    0.00323    0.01328    0.01376
C1    1    0.677148    0.632754    0.370460    11.00000    0.04530    0.04309 =
         0.01688    0.00565    0.00063    0.02324
C2    1    0.732358    0.588081    0.287152    11.00000    0.02678    0.03016 =
         0.01594    0.00294    0.00015    0.00864
C3    1    0.662076    0.538344    0.260640    11.00000    0.02140    0.03898 =
         0.02513    0.00615    0.00495    0.00053
AFIX  43
H3    2    0.574982    0.533197    0.291611    11.00000   -1.20000
AFIX   0
C4    1    0.718111    0.495827    0.188933    11.00000    0.03001    0.02685 =
         0.02659    0.00356    0.00173   -0.00759
AFIX  43
H4    2    0.668779    0.461850    0.171603    11.00000   -1.20000
AFIX   0
C5    1    0.845201    0.502296    0.142241    11.00000    0.02898    0.02202 =
         0.01801    0.00145   -0.00009    0.00078
C6    1    0.914640    0.552776    0.167426    11.00000    0.02210    0.02556 =
         0.02333    0.00053    0.00598   -0.00207
AFIX  43
H6    2    1.000864    0.558239    0.134816    11.00000   -1.20000
AFIX   0
C7    1    0.859756    0.595167    0.239392    11.00000    0.03085    0.02102 =
         0.02241   -0.00062    0.00209   -0.00160
AFIX  43
H7    2    0.908878    0.629225    0.256401    11.00000   -1.20000
AFIX   0
C8    1    0.908104    0.456173    0.066360    11.00000    0.04090    0.02564 =
         0.02690   -0.00581    0.00283    0.00007
AFIX 137
H8A   2    0.909887    0.468153   -0.022172    11.00000   -1.50000
H8C   2    0.854975    0.421229    0.071553    11.00000   -1.50000
H8B   2    1.000375    0.449130    0.100332    11.00000   -1.50000
AFIX   0
O3    4    0.654570    0.775629    0.569389    11.00000    0.03341    0.01724 =
         0.01979    0.00266   -0.00530   -0.00145
O4    4    0.570676    0.787225    0.373149    11.00000    0.02712    0.02589 =
         0.01915   -0.00440   -0.00543    0.00351
C9    1    0.630459    0.806392    0.470710    11.00000    0.01901    0.02103 =
         0.01713   -0.00040    0.00178    0.00368
C10   1    0.675098    0.867029    0.477248    11.00000    0.02083    0.02112 =
         0.01681   -0.00121    0.00439    0.00300
C15   1    0.750077    0.887722    0.582308    11.00000    0.02291    0.02610 =
         0.02020   -0.00324    0.00418    0.00068
AFIX  43
H15   2    0.776379    0.862708    0.649674    11.00000   -1.20000
AFIX   0
C14   1    0.786764    0.944696    0.589422    11.00000    0.02894    0.03378 =
         0.03116   -0.01205    0.01002   -0.00554
AFIX  43
H14   2    0.838480    0.958202    0.661424    11.00000   -1.20000
AFIX   0
C13   1    0.748574    0.982206    0.492201    11.00000    0.03124    0.02074 =
         0.05143   -0.00214    0.02042   -0.00204
C12   1    0.673636    0.961018    0.387550    11.00000    0.03190    0.02619 =
         0.04069    0.01069    0.01153    0.00388
AFIX  43
H12   2    0.646397    0.986078    0.320557    11.00000   -1.20000
AFIX   0
C11   1    0.638197    0.904505    0.379144    11.00000    0.02549    0.02462 =
         0.02477    0.00614    0.00275    0.00213
AFIX  43
H11   2    0.588323    0.890932    0.306127    11.00000   -1.20000
AFIX   0
C16   1    0.787435    1.044091    0.500296    11.00000    0.05358    0.02590 =
         0.08385   -0.00657    0.02536   -0.01216
AFIX 137
H16B  2    0.878980    1.048904    0.471961    11.00000   -1.50000
H16C  2    0.784292    1.057077    0.588022    11.00000   -1.50000
H16A  2    0.724303    1.066531    0.446169    11.00000   -1.50000
AFIX   0
N1    3    0.364449    0.711722    0.518099    11.00000    0.02557    0.02076 =
         0.02270   -0.00039   -0.00425    0.00063
N2    3    0.364739    0.755612    0.712783    11.00000    0.03665    0.03384 =
         0.03180   -0.01252   -0.00440    0.00441
AFIX  93
H2A   2    0.452620    0.750759    0.721020    11.00000   -1.20000
H2B   2    0.322240    0.772476    0.773158    11.00000   -1.20000
AFIX   0
C21   1    0.295292    0.737232    0.607784    11.00000    0.03305    0.01770 =
         0.02030    0.00356   -0.00098    0.00014
C20   1    0.154432    0.744069    0.594253    11.00000    0.03070    0.04384 =
         0.02030    0.00514    0.00506    0.00258
AFIX  43
H20   2    0.107055    0.761710    0.659184    11.00000   -1.20000
AFIX   0
C19   1    0.086652    0.725018    0.486566    11.00000    0.02707    0.06491 =
         0.02389    0.00491    0.00105   -0.00108
AFIX  43
H19   2   -0.008392    0.729354    0.476180    11.00000   -1.20000
AFIX   0
C18   1    0.158139    0.698955    0.391112    11.00000    0.02679    0.04841 =
         0.02156    0.00163   -0.00187   -0.00279
AFIX  43
H18   2    0.112879    0.685488    0.315555    11.00000   -1.20000
AFIX   0
C17   1    0.295341    0.693615    0.410669    11.00000    0.02833    0.03016 =
         0.02160   -0.00415   -0.00422   -0.00048
AFIX  43
H17   2    0.344481    0.676488    0.346285    11.00000   -1.20000
AFIX   0
N3    3    0.615279    0.661516    0.697761    11.00000    0.02128    0.01732 =
         0.01913    0.00121   -0.00134   -0.00044
N4    3    0.838228    0.690876    0.707063    11.00000    0.02280    0.03060 =
         0.02266    0.00894   -0.00477   -0.00508
AFIX  93
H4A   2    0.824743    0.706566    0.631978    11.00000   -1.20000
H4B   2    0.918186    0.692831    0.746986    11.00000   -1.20000
AFIX   0
C26   1    0.736763    0.663943    0.760735    11.00000    0.02415    0.01707 =
         0.01770   -0.00187    0.00121    0.00117
C25   1    0.758323    0.637256    0.880200    11.00000    0.02553    0.02611 =
         0.01860    0.00269   -0.00175    0.00423
AFIX  43
H25   2    0.844234    0.639045    0.924147    11.00000   -1.20000
AFIX   0
C24   1    0.654737    0.609017    0.931435    11.00000    0.03660    0.03040 =
         0.02315    0.00892    0.00583    0.00649
AFIX  43
H24   2    0.668119    0.591167    1.011632    11.00000   -1.20000
AFIX   0
C23   1    0.528313    0.606311    0.865713    11.00000    0.02685    0.02873 =
         0.03464    0.00828    0.00943    0.00097
AFIX  43
H23   2    0.455027    0.586766    0.899976    11.00000   -1.20000
AFIX   0
C22   1    0.514105    0.632641    0.751116    11.00000    0.02127    0.02055 =
         0.02975    0.00322    0.00022    0.00005
AFIX  43
H22   2    0.428882    0.630747    0.705942    11.00000   -1.20000
AFIX   0
HKLF    4


REM  1_a.res in Cc
REM wR2 = 0.0725, GooF = S = 0.831, Restrained GooF = 0.831 for all data
REM R1 = 0.0281 for 4208 Fo > 4sig(Fo) and 0.0281 for all 4216 data
REM 319 parameters refined using 2 restraints

END

WGHT      0.0432      0.8614

REM Highest difference peak  0.725,  deepest hole -0.377,  1-sigma level  0.084
Q1    1   0.5673  0.6606  0.5326  11.00000  0.05    0.72
;
_shelx_res_checksum   62954

_shelx_hkl_file
;
   2   0   0 8015.80  434.66
   4   0   0 2293.27  128.89
  -6   0   0  410.46   23.70
  -6   0   0  384.36   22.80
  -6   0   0  380.46   22.00
  -6   0   0  403.06   23.50
   8   0   0   97.09    6.20
   8   0   0   79.49    5.10
  -8   0   0   90.49    8.20
  -8   0   0   95.69    6.70
   8   0   0   83.49    5.30
  -8   0   0   92.09    5.60
   8   0   0   73.79    5.30
  -8   0   0  100.59    8.20
  10   0   0  432.86   25.30
 -10   0   0  479.25   26.00
  10   0   0  486.65   26.70
  10   0   0  414.96   25.40
  10   0   0  470.85   26.40
 -10   0   0  493.15   26.90
   1  -1   0  564.74   34.00
   1   1   0  663.93   35.10
   3  -1   0 1360.96   78.79
   3   1   0 1435.36   79.79
  -5  -1   0  423.06   22.80
   5  -1   0  376.06   21.60
  -5   1   0  410.56   22.60
  -5   1   0  353.16   22.10
  -7  -1   0  295.57   18.80
  -7  -1   0  276.87   16.60
   7  -1   0  289.87   16.00
  -7  -1   0  306.77   18.80
  -7  -1   0  258.27   17.20
   7  -1   0  315.77   16.20
  -7   1   0  278.57   17.20
   7   1   0  252.57   16.10
  -7   1   0  260.47   16.10
  -7   1   0  294.57   16.60
  -7   1   0  325.47   18.60
   7   1   0  305.37   16.10
  -7   1   0  286.37   18.50
   9  -1   0   17.10    1.30
  -9  -1   0   14.60    1.90
  -9  -1   0   13.50    2.30
   9  -1   0   15.80    1.30
   9  -1   0   18.60    1.60
   9  -1   0   16.70    2.20
  -9  -1   0   13.40    3.40
  -9  -1   0   18.30    2.50
   9  -1   0   12.70    1.40
   9  -1   0   16.50    1.60
   9  -1   0   16.90    1.50
   9   1   0   16.10    1.60
  -9   1   0   14.00    1.90
   9   1   0   14.20    1.30
  -9   1   0   13.50    3.20
   9   1   0   15.50    1.40
  -9   1   0   17.40    2.30
   9   1   0   15.70    1.20
   9   1   0   16.80    1.50
   9   1   0   13.30    1.40
   9   1   0   17.10    2.30
  -9   1   0   14.20    2.20
  11  -1   0   37.70    3.50
 -11  -1   0   30.10    2.90
  11  -1   0   36.70    2.50
 -11  -1   0   29.80    3.20
  11  -1   0   36.70    2.40
  11  -1   0   35.70    2.40
  11  -1   0   39.10    2.30
  11   1   0   36.60    2.40
  11   1   0   36.30    2.40
 -11   1   0   33.50    3.00
  11   1   0   36.00    2.50
  11   1   0   31.70    2.90
 -11   1   0   33.80    3.30
  11   1   0   38.80    3.40
  11   1   0   37.30    2.20
   2  -2   0 2594.94  149.29
   2   2   0 2880.91  151.38
   4  -2   0 3228.68  177.28
   4   2   0 3199.98  179.58
   6  -2   0  119.39    6.70
  -6  -2   0  120.89    8.70
  -6  -2   0   98.79    6.50
  -6  -2   0  120.99    8.40
  -6  -2   0  111.09    6.90
  -6  -2   0  113.29    7.70
  -6   2   0  106.59    8.00
   6   2   0  123.29    7.50
  -6   2   0  112.89    8.00
  -6   2   0  110.99    7.40
   6   2   0  115.89    6.80
  -6   2   0  108.39    6.80
   8  -2   0  206.68   11.60
  -8  -2   0  186.48   11.30
  -8  -2   0  186.98   12.50
  -8  -2   0  188.78   11.90
   8  -2   0  194.88   11.10
   8  -2   0  199.38   10.90
   8  -2   0  193.38   10.90
   8  -2   0  213.68   11.90
   8  -2   0  184.98   10.80
   8  -2   0  196.78   11.10
   8  -2   0  173.28   10.80
  -8  -2   0  190.88   14.40
  -8  -2   0  213.28   14.60
  -8   2   0  193.38   12.20
  -8   2   0  210.78   13.70
  -8   2   0  183.98   11.20
   8   2   0  205.08   11.10
  -8   2   0  195.28   11.90
   8   2   0  175.88   11.10
   8   2   0  198.68   11.80
 -10  -2   0  187.78   12.60
 -10  -2   0  189.28   12.70
  10  -2   0  231.38   11.40
  10  -2   0  198.28   11.10
 -10  -2   0  186.98   11.80
  10   2   0  191.98   12.20
  10   2   0  211.38   12.50
  10   2   0  222.18   11.60
 -10   2   0  212.48   12.70
  10   2   0  190.48   11.30
  10   2   0  191.68   11.20
   1   3   0 2282.47  127.09
   3  -3   0  549.85   33.80
   3   3   0  618.94   37.10
   5  -3   0 1705.53   95.29
   5   3   0 1676.03   99.69
  -7  -3   0  311.87   20.10
  -7  -3   0  314.17   17.90
   7  -3   0  303.37   17.00
   7  -3   0  321.97   17.20
  -7  -3   0  298.47   18.60
  -7  -3   0  312.47   19.90
   7  -3   0  322.47   17.00
   7  -3   0  319.57   17.80
  -7  -3   0  294.37   17.30
   7  -3   0  295.27   17.00
   7   3   0  339.67   17.80
  -7   3   0  293.27   17.60
   7   3   0  287.47   17.70
   7   3   0  333.97   17.20
  -7   3   0  317.27   19.20
  -7   3   0  282.77   17.20
   7   3   0  298.97   17.30
  -7   3   0  296.37   18.00
  -9  -3   0   16.40    3.80
  -9  -3   0   21.20    4.80
   9  -3   0   11.90    2.00
  -9  -3   0   13.30    2.30
   9  -3   0   13.50    2.40
  -9  -3   0   14.70    2.50
   9  -3   0   13.60    1.50
   9  -3   0   13.80    1.40
   9  -3   0   13.30    1.50
   9  -3   0   15.80    1.30
   9  -3   0   15.20    1.60
   9  -3   0   13.80    2.00
  -9  -3   0   15.90    1.90
   9  -3   0   14.10    1.20
   9   3   0   13.10    1.50
   9   3   0   12.70    1.40
   9   3   0   13.80    2.00
  -9   3   0   15.20    2.10
  -9   3   0   14.70    1.90
   9   3   0   15.40    2.10
  -9   3   0   18.00    3.00
  11  -3   0   51.99    2.90
  11  -3   0   44.80    4.00
  11  -3   0   49.90    3.10
 -11  -3   0   39.80    3.90
  11  -3   0   48.60    3.10
  11  -3   0   52.79    3.10
  11   3   0   48.10    3.90
  11   3   0   41.70    3.00
 -11   3   0   46.80    4.00
  11   3   0   49.99    3.10
 -11   3   0   50.59    3.80
  11   3   0   49.90    3.00
  11   3   0   48.20    2.90
   0   4   0  127.19    8.00
   2   4   0  271.07   20.20
   4  -4   0  860.21   49.30
  -6  -4   0    4.20    1.80
   6  -4   0    4.70    0.60
  -6  -4   0    5.40    0.90
  -6  -4   0    3.50    1.70
  -6  -4   0    4.00    1.00
   6   4   0    7.10    1.80
   6   4   0    7.70    1.80
   6   4   0    6.10    1.00
   8  -4   0  130.89    7.70
  -8  -4   0  142.89    8.30
   8  -4   0  133.09    7.90
   8  -4   0  147.49    9.20
  -8  -4   0  134.59   11.30
   8  -4   0  150.48    8.80
   8  -4   0  133.49    8.00
  -8  -4   0  145.99   11.50
  -8  -4   0  140.79    9.60
   8  -4   0  130.59    8.00
   8  -4   0  144.69    8.60
  -8  -4   0  139.99    9.00
   8  -4   0  130.89    7.80
  -8   4   0  138.39    8.70
  -8   4   0  140.79   10.00
   8   4   0  139.79    8.60
  -8   4   0  124.69    8.10
   8   4   0  131.19    8.10
   8   4   0  132.49    8.00
   8   4   0  129.59    8.60
  10  -4   0   58.69    3.60
  10  -4   0   64.99    3.90
  10  -4   0   63.49    4.00
  10  -4   0   63.29    4.60
  10  -4   0   65.69    5.30
  10  -4   0   65.59    3.70
  10  -4   0   60.59    4.10
 -10  -4   0   59.69    5.10
 -10  -4   0   59.89    4.40
  10   4   0   58.99    4.50
 -10   4   0   61.39    4.90
  10   4   0   54.79    3.80
  10   4   0   60.99    4.00
  10   4   0   60.79    3.80
  10   4   0   64.19    3.70
  10   4   0   58.29    4.70
 -10   4   0   62.49    4.50
  -1  -5   0   83.99    4.70
  -1  -5   0   89.99    5.20
   1   5   0   74.69    4.60
  -1   5   0   81.09    4.80
   1   5   0   76.49    5.20
   1   5   0   70.69    4.50
  -1   5   0   82.19    4.70
   1   5   0   70.49    4.80
   1   5   0   75.09    4.70
  -1   5   0   83.79    5.50
  -3  -5   0   87.09    5.60
  -3  -5   0   82.19    4.90
   3  -5   0   78.09    4.80
  -3  -5   0   84.19    5.40
  -3  -5   0   94.89    6.00
  -3  -5   0   91.49    5.30
  -3   5   0   84.19    4.90
   3   5   0   74.69    5.20
   3   5   0   79.49    5.60
  -3   5   0   87.29    5.30
   3   5   0   71.29    4.90
  -3   5   0   87.69    4.80
  -5   5   0  614.74   34.80
   7  -5   0  566.54   30.10
   7  -5   0  540.55   30.20
   7  -5   0  504.75   30.00
   7  -5   0  546.45   30.00
   7  -5   0  571.34   30.80
   7  -5   0  577.64   30.80
   7  -5   0  508.55   29.90
  -7  -5   0  543.55   33.20
  -7  -5   0  589.24   31.90
  -7  -5   0  557.14   33.50
   7   5   0  562.34   31.40
  -7   5   0  587.34   32.00
  -7   5   0  527.45   30.70
   7   5   0  581.44   30.10
   7   5   0  573.54   30.50
  -7   5   0  488.05   30.10
   7   5   0  505.55   30.20
  -9  -5   0  149.99   13.20
   9  -5   0  188.18    9.90
   9  -5   0  176.68    9.60
   9  -5   0  167.58    9.70
   9  -5   0  174.48   11.20
   9  -5   0  190.58   10.70
  -9  -5   0  155.48   11.40
  -9  -5   0  167.08   10.10
   9  -5   0  160.68    9.50
   9  -5   0  164.78    9.80
  -9  -5   0  166.68   11.00
   9  -5   0  182.48   10.30
   9   5   0  173.18    9.80
  -9   5   0  162.08   10.10
  -9   5   0  171.08   11.90
   9   5   0  189.28   10.70
   9   5   0  150.48   10.40
   9   5   0  147.49    9.80
  -9   5   0  176.98   10.80
  11  -5   0   75.19    4.70
  11  -5   0   87.09    4.80
 -11  -5   0   71.89    5.20
  11  -5   0   82.49    4.70
  11  -5   0   85.69    4.60
  11   5   0   78.59    4.60
  11   5   0   78.09    4.80
 -11   5   0   85.19    5.40
  11   5   0   72.59    5.50
  11   5   0   81.79    4.60
   0  -6   0   40.40    2.30
   0  -6   0   36.90    2.50
   0  -6   0   32.00    2.60
   0   6   0   37.20    3.20
   0   6   0   35.20    2.50
   0   6   0   37.60    2.50
  -2   6   0  279.07   17.20
  -2   6   0  347.07   18.00
  -4  -6   0  226.08   13.60
  -4  -6   0  209.98   12.10
  -4  -6   0  233.08   12.70
  -4  -6   0  238.58   13.20
  -4  -6   0  222.48   12.80
   4   6   0  191.08   12.10
   4   6   0  189.78   12.40
  -4   6   0  212.88   12.30
  -4   6   0  195.68   12.00
  -4   6   0  220.88   12.90
  -4   6   0  216.88   12.10
   4   6   0  200.28   12.60
   4   6   0  240.38   13.40
   4   6   0  201.48   12.10
   6  -6   0  180.48   10.70
  -6  -6   0  184.08   13.40
   6  -6   0  190.98   11.50
   6  -6   0  203.68   11.40
   6  -6   0  212.48   10.90
   6  -6   0  212.18   11.90
   6  -6   0  188.18   10.80
  -6  -6   0  196.88   11.40
   6  -6   0  187.18   10.90
  -6  -6   0  204.68   12.30
  -6  -6   0  180.68   12.90
   6  -6   0  191.28   10.50
   6  -6   0  177.78   10.50
  -6  -6   0  185.88   10.90
  -6   6   0  179.08   11.00
   6   6   0  187.08   11.10
   6   6   0  193.88   12.00
   8  -6   0  151.58    8.40
   8  -6   0  135.99    8.10
   8  -6   0  151.58    9.00
   8  -6   0  148.99    9.60
   8  -6   0  148.99    8.10
  -8  -6   0  135.09    8.50
   8  -6   0  146.29    9.00
  -8  -6   0  134.59    9.80
   8  -6   0  132.29    8.00
  -8  -6   0  141.19    9.20
   8  -6   0  140.99    8.30
   8  -6   0  141.19    8.20
  -8  -6   0  125.39   11.50
   8   6   0  139.39    8.20
  -8   6   0  125.59    8.40
   8   6   0  149.99    8.90
  -8   6   0  144.29   10.10
  -8   6   0  139.89    8.90
   8   6   0  146.79    8.40
  10  -6   0    1.60    1.00
  10  -6   0    2.60    0.80
  10  -6   0    2.10    0.50
  10  -6   0    1.80    1.40
  10  -6   0    1.90    0.60
 -10  -6   0    1.60    1.00
 -10  -6   0    1.60    1.10
  10  -6   0    1.40    0.80
 -10  -6   0    4.00    1.40
  10  -6   0    1.60    0.60
  10  -6   0    1.30    0.70
  10   6   0    1.80    1.00
 -10   6   0    0.90    1.20
  10   6   0    2.70    0.70
 -10   6   0    2.30    1.10
  10   6   0    2.90    1.20
  10   6   0    2.60    0.80
  10   6   0    2.10    0.50
  10   6   0    2.10    0.50
  -1   7   0  715.73   40.70
  -3  -7   0  199.78   11.40
  -3  -7   0  204.48   11.00
  -3  -7   0  178.58   10.50
  -3  -7   0  190.98   11.70
  -3  -7   0  190.78   11.00
  -3   7   0  169.48   10.50
   3   7   0  175.98   10.60
   3   7   0  197.28   11.20
  -3   7   0  172.58   10.60
   3   7   0  180.08   11.00
  -3   7   0  198.08   11.50
   3   7   0  181.78   11.60
   3   7   0  183.38   10.70
   5  -7   0  257.17   15.20
  -5  -7   0  276.87   17.40
  -5  -7   0  269.87   16.10
  -5  -7   0  285.47   15.50
  -5  -7   0  302.87   17.10
   5   7   0  263.47   16.10
  -5   7   0  256.77   15.10
   5   7   0  252.47   15.30
  -5   7   0  268.27   16.70
   5   7   0  282.17   16.90
  -7  -7   0  253.77   17.30
   7  -7   0  242.48   13.80
   7  -7   0  222.98   13.60
  -7  -7   0  251.37   16.90
  -7  -7   0  266.47   14.60
   7  -7   0  231.68   13.50
   7  -7   0  247.18   13.70
   7  -7   0  243.08   14.40
  -7  -7   0  246.18   13.90
  -7  -7   0  259.57   15.40
   7  -7   0  232.58   13.50
   7  -7   0  272.87   15.20
   7  -7   0  255.37   14.40
   7  -7   0  250.87   13.80
   7   7   0  237.78   14.10
   7   7   0  241.28   13.70
  -7   7   0  255.37   15.40
  -7   7   0  234.28   14.20
   7   7   0  252.47   14.00
   7   7   0  243.78   15.10
  -7   7   0  224.08   13.80
  -7   7   0  223.18   13.80
  -9  -7   0  100.89   10.60
   9  -7   0  114.99    6.90
   9  -7   0  117.89    7.00
   9  -7   0  116.59    8.60
  -9  -7   0  123.39    8.90
   9  -7   0  121.89    7.20
  -9  -7   0  130.69    8.40
   9  -7   0  121.59    7.60
   9  -7   0  116.49    7.20
   9  -7   0  118.69    7.20
  -9  -7   0  115.89   10.70
  -9  -7   0  129.09    7.60
  -9   7   0  136.29    7.80
  -9   7   0  128.79    8.20
   9   7   0  114.69    7.70
   9   7   0  121.59    7.90
   9   7   0  126.19    7.30
  -9   7   0  122.59    9.00
   9   7   0  118.49    7.10
  11  -7   0   49.90    3.30
  11  -7   0   58.79    3.30
 -11  -7   0   50.99    3.70
  11  -7   0   54.19    3.30
 -11  -7   0   59.99    4.30
  11  -7   0   46.70    4.10
  11   7   0   50.99    3.10
 -11   7   0   49.99    3.90
  11   7   0   51.29    4.00
  11   7   0   53.59    3.10
  11   7   0   54.19    3.20
   0  -8   0  183.68   10.00
   0   8   0  167.88   10.20
   0   8   0  172.18   10.20
   0   8   0  192.38   11.40
  -2  -8   0  136.09    8.00
  -2  -8   0  128.59    7.30
  -2  -8   0  122.09    7.20
   2  -8   0  121.99    7.00
  -2  -8   0  131.99    7.60
  -2  -8   0  120.79    6.90
   2   8   0  115.59    7.10
   2   8   0  115.79    7.40
   2   8   0  109.49    7.30
   2   8   0  113.19    7.90
  -2   8   0  117.49    7.00
   2   8   0  110.79    6.90
  -2   8   0  104.69    8.30
  -4  -8   0  705.43   37.40
   4   8   0  640.14   37.20
  -4   8   0  689.83   38.10
   4   8   0  648.94   36.80
  -4   8   0  652.93   37.10
   6  -8   0  481.65   27.30
  -6  -8   0  513.95   30.70
   6  -8   0  502.05   27.50
  -6  -8   0  506.95   30.10
   6  -8   0  499.75   28.20
   6  -8   0  497.15   27.60
   6  -8   0  499.35   27.50
   6  -8   0  476.15   27.30
   6  -8   0  518.95   28.10
   6  -8   0  476.55   27.40
   6   8   0  499.25   27.70
   6   8   0  528.65   30.00
   6   8   0  511.95   28.90
  -8  -8   0  180.58   14.00
   8  -8   0  183.58   10.20
   8  -8   0  184.38   10.80
  -8  -8   0  188.58   10.40
   8  -8   0  161.08   11.50
   8  -8   0  175.08    9.90
   8  -8   0  164.68    9.90
   8  -8   0  174.48   10.10
  -8  -8   0  192.18   12.00
  -8  -8   0  183.68   11.20
   8  -8   0  169.08   10.20
   8  -8   0  180.58   10.80
   8   8   0  154.98   11.30
  -8   8   0  186.98   11.90
   8   8   0  162.38   10.40
  -8   8   0  178.28   10.90
   8   8   0  185.38   10.80
   8   8   0  165.28   10.10
  -8   8   0  173.18   10.40
  10  -8   0   43.30    3.00
 -10  -8   0   38.40    3.20
  10  -8   0   43.30    2.80
  10  -8   0   37.80    2.70
 -10  -8   0   36.40    3.60
  10  -8   0   43.50    2.60
  10  -8   0   41.80    2.50
  10  -8   0   42.20    2.80
  10  -8   0   34.40    3.80
  10   8   0   36.80    2.70
  10   8   0   40.10    2.60
 -10   8   0   38.60    3.50
  10   8   0   39.10    3.40
  10   8   0   35.40    3.00
  10   8   0   43.20    2.60
  10   8   0   41.20    2.80
  -1  -9   0  245.78   14.50
   1   9   0  267.17   14.10
   1   9   0  252.67   14.80
  -1   9   0  220.28   13.80
  -1   9   0  261.67   13.90
  -1   9   0  256.07   14.00
   1   9   0  232.08   14.90
  -1   9   0  236.78   15.10
   1   9   0  218.78   13.50
  -3  -9   0  550.94   29.90
  -3   9   0  535.65   28.30
  -3   9   0  483.95   31.40
  -3   9   0  456.55   28.30
  -3   9   0  543.25   30.60
  -5  -9   0    6.60    1.00
  -5  -9   0   10.00    2.80
  -5  -9   0    6.50    2.00
  -5  -9   0    6.40    1.50
  -5  -9   0    5.30    1.10
  -5   9   0    6.80    1.00
   5   9   0    6.90    1.20
   5   9   0    9.80    2.00
  -5   9   0    6.30    1.50
   5   9   0    8.90    2.20
   7  -9   0  275.77   15.80
   7  -9   0  267.67   15.80
   7  -9   0  282.57   17.50
  -7  -9   0  315.67   19.50
   7  -9   0  284.77   16.00
  -7  -9   0  296.77   19.70
  -7  -9   0  316.97   16.20
   7  -9   0  275.37   16.60
   7  -9   0  304.37   16.00
  -7  -9   0  300.07   16.80
   7  -9   0  261.97   15.70
   7  -9   0  288.47   16.60
   7  -9   0  283.17   16.00
  -7   9   0  257.67   16.10
  -7   9   0  284.47   16.60
   7   9   0  299.57   17.80
   7   9   0  253.27   16.10
   7   9   0  269.27   17.40
   7   9   0  274.67   15.90
  -7   9   0  318.67   17.60
   7   9   0  280.57   16.40
  -9  -9   0    9.50    1.50
   9  -9   0    7.30    1.20
   9  -9   0    5.70    0.90
   9  -9   0    6.90    2.10
   9  -9   0    7.70    1.00
   9  -9   0    6.70    0.90
   9  -9   0    9.00    1.20
   9  -9   0   10.10    1.80
  -9  -9   0    6.80    1.90
  -9  -9   0    7.70    1.70
   9   9   0    7.30    1.10
  -9   9   0    9.10    1.80
  -9   9   0    8.30    1.80
   9   9   0    6.30    1.10
  -9   9   0    5.60    5.80
   9   9   0    7.10    1.40
   9   9   0    8.80    1.60
  11  -9   0   12.70    1.90
  11  -9   0   13.80    1.20
  11  -9   0   15.80    1.20
  11  -9   0   14.60    1.20
  11  -9   0   15.40    1.10
  11   9   0   14.90    1.00
 -11   9   0   15.60    2.30
  11   9   0   14.50    1.80
  11   9   0   12.70    1.10
   0  10   0  911.11   52.39
   0  10   0  952.20   53.19
  -4 -10   0 1214.78   66.09
  -4  10   0 1121.89   68.09
   4  10   0 1254.87   65.79
   6 -10   0  332.57   20.20
   6 -10   0  334.77   18.60
   6 -10   0  309.77   19.00
   6 -10   0  343.47   18.80
   6 -10   0  318.77   18.70
  -6 -10   0  349.37   22.00
   6 -10   0  321.47   18.50
   6 -10   0  312.57   19.40
   6 -10   0  356.46   18.80
  -6 -10   0  349.96   20.20
   6 -10   0  314.47   18.50
   6 -10   0  356.46   19.30
  -6 -10   0  366.96   19.40
  -6  10   0  341.37   19.30
   6  10   0  351.26   20.40
   6  10   0  330.17   19.20
   6  10   0  342.27   21.40
   8 -10   0  310.87   18.60
   8 -10   0  304.97   16.60
  -8 -10   0  270.47   20.50
   8 -10   0  302.47   16.80
   8 -10   0  313.67   17.40
   8 -10   0  317.17   17.40
   8 -10   0  312.27   16.80
   8 -10   0  300.17   16.80
  -8 -10   0  312.97   18.60
  -8 -10   0  301.27   17.00
   8 -10   0  306.87   16.50
  -8 -10   0  269.97   20.20
  -8 -10   0  306.97   17.80
  -8  10   0  257.37   24.00
  -8  10   0  316.67   17.70
   8  10   0  283.27   16.90
   8  10   0  273.87   18.20
  -8  10   0  291.17   18.30
   8  10   0  296.27   17.20
   8  10   0  299.97   16.80
  10 -10   0  132.69    9.60
  10 -10   0  141.79    8.40
  10 -10   0  149.09    8.20
 -10 -10   0  147.09    8.70
  10 -10   0  154.08    8.40
  10 -10   0  156.78    8.70
  10 -10   0  146.19    8.20
  10  10   0  144.59    8.40
  10  10   0  148.49    8.20
  10  10   0  143.99    9.10
  -1 -11   0  960.70   55.29
   1  11   0 1033.30   55.79
  -3 -11   0  121.29    7.40
  -3 -11   0  121.19    7.40
  -3 -11   0  129.09    8.00
  -3 -11   0  117.59    8.50
  -3 -11   0  115.89    6.90
   3 -11   0  110.39    6.60
   3 -11   0  121.29    7.00
  -3 -11   0  107.69    6.60
   3 -11   0  114.49    6.80
   3  11   0  126.99    8.70
   3  11   0  115.89    7.20
  -3  11   0  116.09    7.10
   3  11   0  107.39    6.70
   3  11   0  113.19    7.80
  -3  11   0  120.99    7.40
   3  11   0  103.59    6.60
  -3  11   0  108.69   10.30
   3  11   0  105.69    7.00
   3  11   0  111.59    7.60
  -5 -11   0   80.39    6.60
  -5 -11   0   71.49    5.10
  -5 -11   0   72.09    4.70
   5 -11   0   75.49    5.00
   5 -11   0   77.79    4.80
   5 -11   0   86.29    4.90
  -5 -11   0   65.69    6.70
   5 -11   0   86.39    6.20
   5 -11   0   72.99    5.10
   5 -11   0   78.09    5.40
   5 -11   0   77.79    4.60
  -5 -11   0   76.19    5.80
   5 -11   0   82.09    4.60
   5  11   0   71.99    4.50
   5  11   0   86.79    7.00
   5  11   0   80.79    5.20
   5  11   0   82.69    6.10
  -5  11   0   65.99    9.20
  -5  11   0   76.39    5.10
  -5  11   0   76.99    5.60
  -7 -11   0  313.27   19.20
  -7 -11   0  255.67   15.50
   7 -11   0  281.47   16.10
   7 -11   0  268.47   15.20
   7 -11   0  260.17   15.40
   7 -11   0  291.87   15.50
   7 -11   0  281.87   15.70
   7 -11   0  267.17   15.50
   7 -11   0  273.07   15.30
   7 -11   0  277.97   17.20
   7 -11   0  253.17   16.00
  -7 -11   0  277.27   19.20
  -7 -11   0  278.97   17.00
  -7 -11   0  280.67   16.30
   7  11   0  272.37   16.00
  -7  11   0  277.17   15.90
   7  11   0  253.47   17.00
  -7  11   0  293.87   16.30
  -7  11   0  285.37   16.90
   7  11   0  291.27   17.40
  -7  11   0  231.98   21.90
   9 -11   0    6.00    1.10
  -9 -11   0    6.20    1.80
   9 -11   0    7.20    2.10
  -9 -11   0    6.30    1.30
   9 -11   0    8.00    1.50
  -9 -11   0    6.40    1.60
   9 -11   0    7.10    0.90
   9 -11   0    5.90    0.80
   9 -11   0    5.60    1.00
   9 -11   0    7.50    1.20
  -9  11   0    5.60    1.80
   9  11   0    6.00    1.00
   9  11   0    5.40    1.30
   9  11   0    7.80    1.20
  -9  11   0    7.60    1.70
  -9  11   0    4.40    4.40
  11 -11   0   34.90    2.90
  11 -11   0   40.70    2.30
  11  11   0   40.10    2.20
  11  11   0   35.10    2.80
   0  12   0 2058.29  107.19
   0  12   0 1786.02  105.79
  -2  12   0  711.43   42.30
   4 -12   0  399.16   22.20
  -4 -12   0  400.56   22.80
   4 -12   0  396.66   22.20
  -4 -12   0  389.16   23.50
  -4 -12   0  436.76   24.40
  -4 -12   0  366.56   24.60
   4 -12   0  406.16   23.00
   4 -12   0  376.96   22.40
   4  12   0  428.56   25.10
  -4  12   0  446.76   25.40
  -4  12   0  419.36   23.40
  -4  12   0  417.96   27.60
   4  12   0  390.26   22.50
   4  12   0  371.46   22.30
   4  12   0  422.36   24.00
   4  12   0  426.36   23.40
  -4  12   0  400.36   23.00
   4  12   0  452.25   24.20
   4  12   0  390.16   22.40
   6 -12   0  105.79    6.10
   6 -12   0  109.59    6.60
   6 -12   0  107.09    7.90
  -6 -12   0  102.89    6.40
   6 -12   0   98.19    6.30
   6 -12   0  104.49    7.00
   6 -12   0  101.49    6.40
  -6 -12   0   99.59    7.50
  -6 -12   0  100.39    6.90
  -6 -12   0  118.59    9.00
   6 -12   0  113.09    6.20
   6 -12   0  103.99    6.30
  -6 -12   0  100.59    9.10
  -6  12   0  112.19    7.50
  -6  12   0  105.19    7.00
   6  12   0  105.69    7.90
   6  12   0  107.49    6.90
   6  12   0   96.09    6.00
   6  12   0  117.69    9.20
  -8 -12   0  607.94   32.80
  -8 -12   0  604.74   32.10
   8 -12   0  560.74   31.50
  -8 -12   0  534.65   35.30
   8 -12   0  522.15   31.00
  -8 -12   0  629.64   35.40
   8 -12   0  535.55   32.70
   8  12   0  506.45   31.40
   8  12   0  547.15   31.00
  -8  12   0  594.34   32.20
  10 -12   0  279.07   14.40
  10 -12   0  250.07   14.50
  10 -12   0  259.97   14.10
  10 -12   0  270.57   15.50
  10  12   0  256.57   14.10
  10  12   0  235.08   14.30
  10  12   0  258.47   15.00
  10  12   0  234.88   14.20
 -10  12   0  282.27   15.50
   1  13   0  423.16   25.70
   1  13   0  475.05   28.00
  -1  13   0  422.46   28.10
  -1  13   0  456.25   26.10
  -1  13   0  465.25   26.00
   1  13   0  523.85   26.40
  -1  13   0  491.15   26.20
   1  13   0  479.85   27.40
  -3 -13   0 1057.79   54.99
  -3  13   0  877.61   53.09
   5 -13   0  145.69    8.20
  -5 -13   0  123.19   10.40
  -5 -13   0  135.99    8.50
   5 -13   0  138.39    8.70
   5 -13   0  131.19    8.00
   5 -13   0  139.09    7.80
  -5 -13   0  135.09   10.10
  -5 -13   0  120.99    8.20
   5 -13   0  133.29    9.40
  -5 -13   0  138.39    8.00
   5 -13   0  137.29    7.80
   5 -13   0  125.99    8.20
  -5 -13   0  154.18    9.30
   5 -13   0  139.49    7.90
  -5  13   0  137.49    8.70
  -5  13   0  157.48   11.40
   5  13   0  120.79    7.70
   5  13   0  138.39    7.80
   5  13   0  145.29   10.80
   5  13   0  135.99    8.50
   5  13   0  135.59    9.60
  -5  13   0  156.28    9.30
   7 -13   0  105.69    6.90
   7 -13   0  111.99    6.90
   7 -13   0  112.29    6.60
   7 -13   0  119.49    6.80
   7 -13   0  112.39    6.60
  -7 -13   0  120.89    9.90
  -7 -13   0  121.99   10.40
   7 -13   0  106.39    7.40
  -7 -13   0  129.09    8.50
  -7 -13   0  127.09    7.80
   7 -13   0  104.39    7.00
  -7  13   0  122.89   10.50
   7  13   0  114.19    7.40
   7  13   0  101.29    8.30
   9 -13   0  230.08   12.70
  -9 -13   0  222.68   14.00
   9 -13   0  209.58   12.90
   9 -13   0  238.58   12.70
   9 -13   0  240.58   12.50
  -9 -13   0  215.58   13.40
   9 -13   0  224.88   12.40
   9  13   0  205.18   12.60
  -9  13   0  220.18   13.80
   9  13   0  238.58   13.30
   0 -14   0    4.70    1.00
   0 -14   0    6.20    1.00
   0 -14   0    6.50    1.00
   0  14   0    3.40    0.90
   0  14   0    4.70    1.00
   0  14   0    8.60    2.20
   0  14   0    4.40    1.10
   0  14   0    5.90    1.40
   0  14   0    5.20    2.50
   0  14   0    9.90    3.10
   0  14   0    7.70    2.50
   2 -14   0  194.18   11.20
  -2 -14   0  186.28   11.50
  -2 -14   0  215.68   11.90
  -2 -14   0  203.28   12.30
  -2  14   0  207.18   11.80
  -2  14   0  198.18   11.80
  -2  14   0  199.78   12.00
   2  14   0  190.88   12.60
   2  14   0  195.98   12.40
   2  14   0  192.78   13.50
   2  14   0  194.58   11.90
  -2  14   0  181.58   14.40
   2  14   0  199.58   11.60
   2  14   0  176.78   11.10
   4 -14   0  103.49    5.70
  -4 -14   0  112.19    7.90
   4 -14   0   92.59    7.20
   4 -14   0   98.19    5.70
  -4 -14   0  104.09    6.90
  -4 -14   0  100.99    7.10
  -4 -14   0   93.59    8.10
  -4 -14   0   97.39    6.30
  -4 -14   0   94.09    5.80
   4 -14   0   96.39    6.50
   4 -14   0   96.99    5.50
   4 -14   0  110.89    6.20
   4 -14   0   99.29    5.60
   4 -14   0   93.39    5.70
  -4 -14   0   92.99    6.10
   4  14   0  103.79    7.60
   4  14   0   95.19    8.30
  -4  14   0  108.99    9.50
  -4  14   0   93.49    6.70
  -4  14   0   98.79    6.80
  -4  14   0   95.09    6.70
   4  14   0   94.29    6.80
   4  14   0   95.99    6.00
   4  14   0  109.59    6.60
   4  14   0   96.79    5.90
   4  14   0  107.99    7.70
   4  14   0   90.19    5.80
  -4  14   0  100.09    7.00
   4  14   0   91.29    5.80
   6 -14   0  112.29    7.50
   6 -14   0  111.99    6.60
   6 -14   0  113.39    7.10
   6 -14   0  118.69    6.80
  -6 -14   0  120.29    8.20
   6 -14   0  111.39    6.80
  -6 -14   0  114.59    9.30
  -6 -14   0  111.59    7.50
   6 -14   0  111.19    6.60
   6 -14   0  109.29    8.40
  -6 -14   0  119.29   10.10
  -6 -14   0  114.49    6.90
  -6  14   0  102.39   12.60
   6  14   0  116.09    8.70
   6  14   0  122.79    7.50
  -6  14   0   99.59    7.60
   6  14   0  114.89    9.70
   6  14   0  111.89    6.50
  -6  14   0  111.59   10.30
  -6  14   0  128.09    8.30
  -6  14   0  113.29    7.80
  -8 -14   0  148.69    8.90
   8 -14   0  151.88    9.20
   8 -14   0  158.68    8.50
  -8 -14   0  150.78    9.50
   8 -14   0  145.69   10.30
   8 -14   0  153.38    8.80
   8 -14   0  158.28    8.60
   8 -14   0  155.18    8.70
  -8 -14   0  146.19   10.10
   8  14   0  146.69    8.70
   8  14   0  152.78    8.80
  -8  14   0  150.28    9.90
   8  14   0  139.49    9.10
  10 -14   0   29.40    1.80
  10 -14   0   28.60    2.60
  10 -14   0   29.30    2.00
  10 -14   0   29.80    1.80
  10 -14   0   26.30    2.10
  10  14   0   26.50    2.40
 -10  14   0   24.20    2.90
  -1 -15   0  459.75   26.20
   1 -15   0  406.46   25.30
  -1 -15   0  441.96   25.70
  -1  15   0  444.06   28.00
   1  15   0  466.05   28.30
  -1  15   0  459.45   26.00
  -1  15   0  519.25   26.60
  -1  15   0  470.85   25.80
   1  15   0  492.05   26.30
   1  15   0  506.45   26.90
  -1  15   0  433.56   29.20
   1  15   0  458.05   25.60
   1  15   0  466.65   27.30
   1  15   0  460.45   27.30
  -1  15   0  464.95   26.10
  -1  15   0  456.25   27.10
  -1  15   0  466.65   28.60
   3 -15   0  346.77   20.00
  -3 -15   0  352.16   19.60
  -3 -15   0  347.67   20.50
   3 -15   0  306.97   19.90
   3 -15   0  336.17   19.30
   3 -15   0  340.37   19.50
   3 -15   0  332.47   19.30
   3 -15   0  339.77   19.60
  -3 -15   0  368.46   20.30
  -3 -15   0  378.66   21.30
   3  15   0  379.56   21.60
   3  15   0  347.27   19.70
   3  15   0  349.47   22.40
  -3  15   0  337.97   20.40
  -3  15   0  367.96   20.70
  -3  15   0  359.16   20.30
   3  15   0  369.06   20.60
   3  15   0  346.87   21.10
  -3  15   0  361.06   20.40
  -3  15   0  376.96   23.80
   3  15   0  370.36   20.20
   3  15   0  317.67   19.50
   3  15   0  357.46   19.60
   5 -15   0  356.06   20.10
  -5 -15   0  346.57   21.90
   5 -15   0  368.86   21.30
  -5 -15   0  369.36   20.80
  -5 -15   0  337.17   19.70
  -5 -15   0  343.97   19.40
  -5 -15   0  306.67   20.30
   5 -15   0  345.47   19.40
   5 -15   0  338.67   19.70
   5 -15   0  347.37   19.20
   5  15   0  324.17   22.50
   5  15   0  366.16   21.60
   5  15   0  339.67   19.30
  -5  15   0  320.67   20.40
  -5  15   0  361.16   20.80
  -5  15   0  352.96   20.70
  -5  15   0  360.86   20.60
   5  15   0  335.97   19.20
  -5  15   0  397.86   24.60
   5  15   0  376.56   20.30
  -7 -15   0  211.88   15.10
  -7 -15   0  216.88   12.10
  -7 -15   0  208.08   13.30
  -7 -15   0  194.98   13.20
  -7 -15   0  182.28   12.30
   7 -15   0  221.48   12.30
   7 -15   0  217.68   11.80
   7 -15   0  214.58   12.60
   7 -15   0  199.08   13.60
   7 -15   0  216.48   11.80
   7 -15   0  219.18   12.00
  -7  15   0  235.18   13.30
  -7  15   0  236.38   13.60
   7  15   0  217.18   14.00
  -7  15   0  183.28   16.30
   7  15   0  207.78   12.60
   7  15   0  190.08   12.00
   7  15   0  185.78   13.70
  -7  15   0  234.18   13.50
   9 -15   0  151.38    9.70
   9 -15   0  154.68    8.40
   9 -15   0  145.59    8.80
   9 -15   0  154.28    8.50
   9 -15   0  154.48    8.60
   9  15   0  161.78    9.20
   9  15   0  132.69    8.60
   0 -16   0   87.19    5.60
   0 -16   0   91.89    5.50
   0 -16   0   98.99    6.10
   0 -16   0   87.79    5.40
   0  16   0   86.09    7.30
   0  16   0  109.79    8.60
   0  16   0   99.79    7.40
   0  16   0  101.19    6.80
   0  16   0   91.19    6.30
   2 -16   0   31.40    2.20
  -2 -16   0   36.70    3.10
  -2 -16   0   36.50    2.50
   2 -16   0   32.80    2.40
   2 -16   0   31.30    2.40
   2 -16   0   29.20    2.70
   2 -16   0   30.20    2.20
  -2 -16   0   36.40    3.40
   2 -16   0   31.50    2.20
   2 -16   0   38.70    2.70
  -2 -16   0   36.00    2.80
   2  16   0   35.10    3.80
  -2  16   0   34.10    5.90
   2  16   0   38.70    4.70
   2  16   0   31.70    2.60
   2  16   0   31.30    3.50
   2  16   0   37.40    3.00
   2  16   0   34.10    3.20
  -2  16   0   36.60    3.80
   2  16   0   33.60    2.60
   2  16   0   33.90    2.50
   2  16   0   35.40    2.60
   4 -16   0   98.29    5.90
   4 -16   0  105.89    6.80
  -4 -16   0  107.09    7.50
   4 -16   0  105.29    6.40
  -4 -16   0  112.99    7.20
   4 -16   0   98.99    5.70
  -4 -16   0  102.79    6.30
  -4 -16   0  104.09    8.00
   4 -16   0  101.59    6.00
   4 -16   0   99.09    6.20
   4 -16   0  100.49    6.20
   4  16   0   98.99    6.30
   4  16   0   95.19    8.80
   4  16   0   98.69    6.10
   4  16   0  104.59    6.10
   4  16   0  107.79    6.90
   4  16   0   93.39    6.10
  -4  16   0  106.59    7.10
   4  16   0   96.39    7.20
  -4  16   0   91.09   10.50
   4  16   0  106.09    8.10
  -4  16   0  109.19    7.30
  -4  16   0   99.29   10.00
   4  16   0  104.79    8.10
  -4  16   0  104.79    7.30
  -4  16   0  100.99    7.20
   6 -16   0    2.20    1.20
   6 -16   0    3.90    1.60
  -6 -16   0    2.70    1.30
   6 -16   0    1.80    0.60
  -6 -16   0    4.00    1.00
   6 -16   0    2.50    1.00
  -6 -16   0    3.00    1.70
   6 -16   0    2.70    0.60
   6 -16   0    2.40    0.70
   6  16   0    8.80    3.20
  -6  16   0    5.20    2.00
   6  16   0    3.40    0.80
  -6  16   0    3.60    1.50
  -6  16   0    8.40    5.00
   6  16   0    2.90    1.50
   6  16   0    4.40    1.20
  -6  16   0    6.00    1.80
  -6  16   0    7.00    3.40
   8 -16   0   49.60    3.40
   8 -16   0   46.40    3.70
   8 -16   0   53.99    3.20
  -8 -16   0   56.69    4.50
   8 -16   0   51.69    3.20
   8 -16   0   50.79    4.50
   8  16   0   53.39    3.90
   8  16   0   48.70    3.30
  -8  16   0   45.20    4.30
   1 -17   0  176.58   10.20
   1 -17   0  170.08    9.60
   1 -17   0  149.39    9.50
   1 -17   0  159.38    9.70
   1 -17   0  167.58    9.60
  -1 -17   0  182.38   10.50
   1 -17   0  161.88    9.80
  -1 -17   0  161.88    9.50
  -1 -17   0  170.98    9.70
  -1  17   0  154.28   10.00
   1  17   0  154.28    9.80
   1  17   0  150.78    9.90
  -1  17   0  175.68   11.00
   1  17   0  186.88   11.90
  -1  17   0  163.28   13.50
  -1  17   0  167.38   10.20
   1  17   0  180.78   12.80
  -1  17   0  155.68   11.80
  -1  17   0  189.08   10.70
   1  17   0  177.68   11.30
   1  17   0  167.68    9.90
   1  17   0  178.58   10.70
  -1  17   0  194.78   12.00
   1  17   0  179.48   10.00
  -1  17   0  196.58   13.40
  -1  17   0  175.48   10.10
  -3 -17   0   49.40    3.20
   3 -17   0   41.50    2.60
   3 -17   0   39.40    2.80
  -3 -17   0   48.30    3.70
   3 -17   0   40.10    3.10
   3 -17   0   45.30    3.00
   3 -17   0   43.10    3.50
   3 -17   0   38.50    3.00
  -3 -17   0   50.29    4.50
  -3  17   0   44.30    6.30
   3  17   0   43.20    3.90
   3  17   0   42.20    5.30
   3  17   0   49.00    3.70
  -3  17   0   49.60    4.00
   3  17   0   43.80    4.60
   3  17   0   39.50    4.30
  -3  17   0   46.30    6.40
   3  17   0   44.50    3.20
  -3  17   0   43.20    3.60
   3  17   0   38.10    3.10
  -3  17   0   48.00    3.90
   3  17   0   42.40    3.00
  -5 -17   0  287.67   16.40
   5 -17   0  313.17   16.50
  -5 -17   0  276.37   18.50
   5 -17   0  285.07   16.70
   5 -17   0  297.37   15.90
   5 -17   0  271.37   16.10
  -5 -17   0  289.57   17.30
   5 -17   0  288.67   15.90
  -5  17   0  266.47   17.20
   5  17   0  297.87   19.80
   5  17   0  278.07   18.30
  -5  17   0  272.67   17.40
  -5  17   0  292.27   17.10
   5  17   0  308.77   16.00
  -5  17   0  278.57   17.10
   5  17   0  300.77   17.00
   5  17   0  279.47   15.80
  -5  17   0  265.27   20.80
   7 -17   0   30.80    2.80
   7 -17   0   25.60    2.30
   7 -17   0   30.50    2.10
  -7 -17   0   28.80    3.10
   7 -17   0   33.40    2.50
   7 -17   0   29.20    2.10
  -7 -17   0   31.40    2.60
   7  17   0   32.40    2.70
  -7  17   0   30.20    3.30
  -7  17   0   27.90    3.60
   7  17   0   28.90    3.50
   9 -17   0   83.09    4.60
   9 -17   0   74.79    4.90
   9 -17   0   85.29    4.70
   9 -17   0   85.29    4.60
   9  17   0   76.19    5.10
   9  17   0   74.19    4.70
   0 -18   0  125.59    7.30
   0 -18   0  122.09    7.20
   0 -18   0  127.49    8.00
   0 -18   0  112.39    7.30
   0  18   0  123.89    7.70
   0  18   0  136.09    9.60
   0  18   0  114.89    7.60
   0  18   0  136.69    7.80
   0  18   0  141.39   10.80
   0  18   0  126.49    8.30
   0  18   0  133.39    8.20
   0  18   0  130.19    8.90
  -2 -18   0  148.39    9.70
   2 -18   0  153.08    9.30
   2 -18   0  163.68    9.10
   2 -18   0  164.48    9.10
   2 -18   0  162.88    9.20
   2 -18   0  164.58    9.60
   2 -18   0  147.59    9.50
  -2 -18   0  161.18    9.40
   2 -18   0  162.08    9.50
  -2 -18   0  171.58   10.40
  -2 -18   0  143.49   10.00
   2  18   0  162.28   11.10
  -2  18   0  185.38   13.50
   2  18   0  168.18   10.50
  -2  18   0  150.98   10.50
   2  18   0  152.98    9.40
   2  18   0  170.78   12.70
   2  18   0  169.08   11.60
  -2  18   0  171.08   10.20
   2  18   0  149.59    9.40
  -2  18   0  167.28   11.50
   2  18   0  165.18    9.50
  -2  18   0  162.98   14.00
   2  18   0  171.88    9.70
  -2  18   0  176.38    9.90
  -2  18   0  141.69    9.60
   2  18   0  172.38   10.20
   4 -18   0  160.88    9.10
  -4 -18   0  154.08   10.00
   4 -18   0  168.58    9.30
   4 -18   0  152.88    9.60
  -4 -18   0  148.69    9.30
   4 -18   0  154.58    8.90
  -4 -18   0  152.88   11.00
  -4 -18   0  153.18   10.50
   4 -18   0  161.68    9.40
   4 -18   0  166.68    8.90
   4  18   0  168.88   10.00
   4  18   0  156.98    9.00
   4  18   0  161.48    9.10
   4  18   0  152.08   11.20
  -4  18   0  149.39   13.50
   4  18   0  157.68    9.10
   4  18   0  155.78   12.40
  -4  18   0  145.89    9.80
   4  18   0  149.88    9.30
  -4  18   0  158.88    9.90
  -4  18   0  150.78   10.00
   6 -18   0   11.00    1.90
   6 -18   0    9.00    1.20
   6 -18   0   13.00    1.50
   6 -18   0    9.90    1.40
   6 -18   0    9.90    1.20
   6  18   0   12.40    1.00
   6  18   0   12.70    1.70
  -6  18   0   16.10    2.80
   8 -18   0   89.09    5.00
   8 -18   0   89.79    5.20
   8 -18   0   77.99    5.30
   8 -18   0   83.79    5.00
  -8 -18   0   91.99    5.50
  -8  18   0   72.79    5.60
   8  18   0   94.29    5.60
   8  18   0   86.79    5.10
   1 -19   0   26.80    2.20
   1 -19   0   25.10    1.90
   1 -19   0   26.90    2.40
  -1 -19   0   24.20    2.60
   1 -19   0   24.10    2.00
  -1 -19   0   24.90    1.80
  -1 -19   0   25.30    2.00
   1 -19   0   25.80    1.90
  -1  19   0   27.80    4.70
   1  19   0   26.90    2.70
  -1  19   0   34.00    4.00
   1  19   0   25.00    2.80
  -1  19   0   22.70    3.00
   1  19   0   27.60    3.40
   1  19   0   26.70    2.30
  -1  19   0   26.90    2.50
  -1  19   0   22.00    2.40
  -1  19   0   24.10    2.60
   1  19   0   29.30    2.50
   1  19   0   27.70    2.40
   1  19   0   26.00    3.60
  -1  19   0   32.40    5.60
  -1  19   0   24.00    2.60
   3 -19   0   81.29    5.10
   3 -19   0   80.79    5.00
  -3 -19   0   77.09    5.00
   3 -19   0   75.39    4.70
   3 -19   0   79.89    4.60
   3 -19   0   78.99    4.90
   3 -19   0   78.19    5.30
   3 -19   0   81.49    4.80
   3 -19   0   73.19    4.70
   3  19   0   77.19    6.80
  -3  19   0   70.79    5.40
   3  19   0   88.69    5.90
  -3  19   0   83.09    8.80
   3  19   0   83.39    7.10
   3  19   0   73.09    6.10
  -3  19   0   84.09    7.10
  -3  19   0   74.99    6.00
   3  19   0   84.59    5.00
  -3  19   0   88.69    5.80
   3  19   0   67.19    5.00
   3  19   0   80.59    5.20
  -3  19   0   77.19    5.60
  -3  19   0   75.69    5.60
   3  19   0   85.79    8.10
  -3  19   0   86.89    5.60
  -5 -19   0    1.10    1.00
  -5 -19   0    2.70    1.40
   5 -19   0    0.70    0.50
  -5 -19   0    2.20    0.80
   5 -19   0    1.20    0.80
   5 -19   0    0.40    0.50
   5 -19   0    1.80    1.00
   5 -19   0    0.90    0.60
  -5  19   0    0.70    1.70
  -5  19   0    1.50    1.40
   5  19   0    1.90    1.40
  -5  19   0    3.30    1.40
  -5  19   0    1.10    0.90
  -5  19   0    1.50    1.10
   5  19   0    1.00    0.70
   5  19   0    2.50    1.70
  -5  19   0   -0.40    2.70
  -5  19   0    0.00    1.40
   7 -19   0    6.00    1.20
   7 -19   0    7.70    1.10
   7 -19   0    5.90    1.00
   7 -19   0    7.20    0.90
   7 -19   0    7.60    0.90
  -7 -19   0    7.50    1.30
  -7  19   0    5.10    1.50
  -7  19   0    2.40    2.30
  -7  19   0    6.50    1.60
   7  19   0    4.60    1.70
   0  20   0  739.03   43.40
   0  20   0  736.33   41.70
   0  20   0  776.42   44.30
   0  20   0  727.53   42.60
   0  20   0  725.93   41.60
   0  20   0  833.02   42.70
   0  20   0  780.32   45.70
  -2 -20   0   98.19    5.50
   2 -20   0   84.69    5.20
   2 -20   0   84.29    5.10
  -2 -20   0   83.79    6.30
   2 -20   0   79.19    5.20
   2 -20   0   82.59    5.50
   2 -20   0   84.89    5.60
   2 -20   0   80.59    5.40
   2  20   0   87.89    5.60
   2  20   0   88.59    5.70
   2  20   0   92.29    6.30
  -2  20   0   98.39    9.20
  -2  20   0   97.79    5.90
   2  20   0   74.69    6.40
  -2  20   0   98.89    5.90
   2  20   0   93.29    8.70
  -2  20   0   95.59    6.40
   2  20   0   85.19    5.60
  -2  20   0   94.19   10.00
   2  20   0   86.49    7.50
  -2  20   0   90.09    6.80
   2  20   0   76.79    7.00
  -2  20   0   88.89    7.60
   2  20   0   93.39    5.60
  -4 -20   0  381.66   21.10
   4 -20   0  387.46   21.20
   4 -20   0  353.06   20.90
   4 -20   0  388.76   21.20
  -4 -20   0  349.96   21.60
  -4 -20   0  364.86   22.50
  -4  20   0  350.76   21.20
  -4  20   0  381.86   21.40
   4  20   0  389.76   20.90
  -4  20   0  345.47   22.10
   4  20   0  366.46   23.50
  -4  20   0  331.77   23.20
   4  20   0  399.86   20.80
  -4  20   0  407.36   21.50
  -4  20   0  362.36   21.70
   4  20   0  371.16   24.70
  -4  20   0  420.86   21.70
   4  20   0  407.76   20.90
   4  20   0  388.76   21.90
  -4  20   0  336.97   25.10
   6 -20   0   63.49    4.00
   6 -20   0   60.99    4.10
   6 -20   0   63.79    3.80
  -6 -20   0   57.19    4.70
   6 -20   0   62.69    4.30
   6 -20   0   69.89    3.80
  -6 -20   0   62.69    4.20
  -6  20   0   63.09    4.70
  -6  20   0   54.69    4.40
   6  20   0   63.29    3.60
   6  20   0   58.39    4.50
  -6  20   0   62.09    4.60
   8 -20   0   47.80    3.30
   8 -20   0   56.49    3.10
   8 -20   0   53.09    3.10
   8 -20   0   55.09    3.20
  -8 -20   0   56.49    3.40
   8  20   0   50.39    3.10
   8  20   0   51.29    3.40
  -8  20   0   44.70    3.40
  -8  20   0   46.00    3.40
   1 -21   0   33.70    2.60
   1 -21   0   35.00    2.30
   1 -21   0   32.60    2.30
   1 -21   0   33.20    2.80
  -1 -21   0   27.60    2.30
  -1 -21   0   29.50    2.40
  -1  21   0   28.70    3.10
  -1  21   0   34.00    4.30
   1  21   0   34.40    5.00
  -1  21   0   31.00    3.60
  -1  21   0   31.80    2.80
   1  21   0   29.10    3.20
   1  21   0   36.40    4.00
  -1  21   0   29.20    2.60
   1  21   0   35.70    2.70
  -1  21   0   27.50    4.70
   1  21   0   36.10    2.70
  -1  21   0   29.20    2.80
   1  21   0   30.70    2.70
   1  21   0   37.00    2.80
   1  21   0   35.10    4.30
   1  21   0   35.00    3.20
  -1  21   0   33.00    3.20
  -1  21   0   33.70    2.80
   3 -21   0  215.38   12.30
   3 -21   0  192.98   12.30
  -3 -21   0  214.58   12.40
  -3 -21   0  227.08   12.30
   3 -21   0  214.58   12.10
   3 -21   0  196.38   12.30
   3 -21   0  227.68   12.10
   3 -21   0  223.18   12.50
   3  21   0  213.48   12.50
   3  21   0  229.18   12.30
  -3  21   0  229.98   16.70
  -3  21   0  222.98   15.00
   3  21   0  212.48   12.40
   3  21   0  202.08   14.70
   3  21   0  224.28   12.30
  -3  21   0  211.88   13.70
   3  21   0  220.38   13.30
  -3  21   0  211.58   13.20
   3  21   0  193.28   15.60
   5 -21   0   54.69    3.70
   5 -21   0   51.29    4.00
   5 -21   0   56.49    3.60
  -5 -21   0   62.39    3.90
   5 -21   0   52.69    3.50
  -5 -21   0   62.19    3.70
  -5  21   0   62.39    4.30
  -5  21   0   61.39    4.40
  -5  21   0   61.69    4.30
  -5  21   0   61.59    4.30
   5  21   0   54.39    3.50
   5  21   0   52.19    4.30
   7 -21   0  232.68   13.90
   7 -21   0  247.98   13.90
   7 -21   0  263.87   13.70
  -7 -21   0  253.17   14.00
  -7  21   0  249.97   14.00
   7  21   0  246.08   13.80
  -7  21   0  242.28   14.20
   0 -22   0    0.60    0.80
   0 -22   0    2.30    0.60
   0  22   0    0.50    0.80
   0  22   0    2.40    1.80
   0  22   0    3.80    1.30
   0  22   0    1.60    0.80
   0  22   0    2.00    1.20
   0  22   0    2.80    1.10
   0  22   0    2.20    1.70
   0  22   0    1.60    1.20
   2 -22   0  251.27   14.10
  -2 -22   0  242.28   15.40
   2 -22   0  246.48   14.50
  -2 -22   0  255.17   14.50
   2 -22   0  272.07   14.40
  -2 -22   0  268.47   14.50
   2 -22   0  241.88   14.60
   2 -22   0  249.08   14.20
   2 -22   0  242.28   14.40
  -2  22   0  257.37   14.60
  -2  22   0  243.08   16.00
   2  22   0  264.27   14.50
  -2  22   0  245.18   18.40
   2  22   0  230.88   16.80
   2  22   0  251.97   15.40
   2  22   0  228.18   17.80
  -2  22   0  239.68   15.40
  -2  22   0  232.58   16.90
  -2  22   0  276.27   14.80
   2  22   0  267.47   14.80
  -2  22   0  276.27   14.90
  -2  22   0  272.17   15.50
  -2  22   0  273.67   14.60
   2  22   0  274.87   14.50
  -4 -22   0  175.88   10.10
  -4 -22   0  172.58   10.30
   4 -22   0  169.18   10.10
   4 -22   0  181.88   10.40
   4 -22   0  170.48   10.00
  -4  22   0  180.48   10.60
  -4  22   0  180.98   10.50
  -4  22   0  178.28   10.40
  -4  22   0  187.38   10.50
   4  22   0  178.38   10.10
   4  22   0  177.68   10.00
   4  22   0  167.28   10.90
  -6 -22   0  132.89    7.90
   6 -22   0  131.69    7.90
   6 -22   0  137.39    7.60
   6 -22   0  147.89    7.80
   6 -22   0  138.09    7.90
   6 -22   0  141.79    7.70
  -6 -22   0  134.59    7.70
  -6  22   0  123.39    8.10
  -6  22   0  123.99    8.00
  -6  22   0  136.19    8.00
  -1 -23   0  163.78    9.00
  -1 -23   0  171.08    9.20
   1 -23   0  144.09    8.80
   1 -23   0  139.99    8.80
  -1 -23   0  151.58    9.80
  -1  23   0  169.58    9.40
  -1  23   0  171.68   10.10
   1  23   0  143.19    9.10
   1  23   0  151.38    9.40
   1  23   0  155.28   10.00
   1  23   0  158.88    9.20
   1  23   0  146.79    9.20
   3 -23   0  371.66   20.30
  -3 -23   0  368.16   20.50
   3 -23   0  339.37   20.50
   3 -23   0  365.16   20.70
  -3  23   0  383.56   20.80
  -3  23   0  391.46   20.60
   3  23   0  366.96   20.50
   3  23   0  329.57   20.70
  -3  23   0  381.06   20.60
  -3  23   0  384.16   20.90
   3  23   0  355.06   21.40
  -3  23   0  354.96   21.30
   3  23   0  391.76   20.40
  -5 -23   0   40.30    2.90
  -5 -23   0   39.50    2.70
   5 -23   0   49.00    2.70
   5 -23   0   43.90    3.00
   5 -23   0   42.10    2.90
  -5  23   0   37.10    3.10
  -5  23   0   38.20    2.90
   5  23   0   45.10    2.60
  -5  23   0   38.70    3.10
  -5  23   0   44.60    3.10
   7  23   0   90.19    5.60
   0 -24   0  130.09    7.70
   0 -24   0  124.19    7.40
   0  24   0  126.59    7.60
   0  24   0  131.69    7.70
   0  24   0  120.89    8.40
   0  24   0  132.59    7.80
   0  24   0  127.59    7.90
   2 -24   0    6.30    1.10
   2 -24   0    5.90    0.90
  -2 -24   0    6.50    1.00
  -2 -24   0    8.90    1.20
   2 -24   0    9.80    1.50
   2  24   0    8.40    1.20
   2  24   0    8.20    1.70
   2  24   0    7.90    1.20
  -2  24   0    6.80    1.50
  -2  24   0    6.10    1.30
   2  24   0    8.40    1.30
   2  24   0    8.20    1.20
  -2  24   0    5.80    1.20
  -2  24   0    8.30    1.40
  -2  24   0    7.80    1.40
  -4 -24   0    7.10    1.10
   4 -24   0    8.30    1.10
  -4 -24   0    8.40    1.10
   4 -24   0    8.80    1.00
   4 -24   0   10.00    1.20
   4 -24   0    8.90    1.00
   4 -24   0    8.80    1.20
  -4  24   0    9.50    1.40
   4  24   0   10.90    1.00
  -4  24   0    8.00    1.30
  -4  24   0    9.80    1.30
  -4  24   0    8.60    1.30
  -6 -24   0   63.79    3.60
   6 -24   0   60.89    3.40
   6 -24   0   54.39    3.40
   6  24   0   51.69    3.40
  -6  24   0   59.29    3.60
  -6  24   0   49.90    3.50
  -1 -25   0  195.18   11.00
   1 -25   0  188.68   10.80
  -1 -25   0  179.18   11.20
   1 -25   0  190.48   11.30
   1 -25   0  191.88   11.30
   1  25   0  185.18   12.00
   1  25   0  194.58   11.40
  -1  25   0  197.08   11.30
  -1  25   0  209.28   11.30
  -1  25   0  211.18   11.20
   1  25   0  207.18   11.20
  -1  25   0  179.38   11.90
   1  25   0  213.38   11.20
  -1  25   0  192.08   11.50
  -3 -25   0  209.68   12.30
   3 -25   0  193.38   12.30
   3 -25   0  207.38   12.50
   3 -25   0  216.58   12.10
  -3 -25   0  217.88   12.30
   3  25   0  240.68   12.30
  -3  25   0  211.88   12.50
   3  25   0  228.88   12.10
  -3  25   0  230.18   12.40
  -3  25   0  223.88   12.50
  -3  25   0  215.58   12.30
  -5 -25   0   54.39    3.20
  -5 -25   0   51.19    3.20
   5 -25   0   48.50    3.20
   5 -25   0   52.09    3.00
  -5  25   0   51.09    3.10
  -5  25   0   46.90    3.20
  -5  25   0   49.60    3.30
   0 -26   0    0.60    0.70
   0 -26   0    1.80    0.80
   0  26   0    0.90    0.70
   0  26   0    1.30    0.70
   0  26   0    1.70    0.70
   0  26   0    1.10    0.90
  -2 -26   0   22.40    1.80
  -2 -26   0   19.30    1.70
  -2 -26   0   20.00    1.60
   2 -26   0   17.10    1.80
   2 -26   0   20.00    1.70
  -2  26   0   21.30    2.00
  -2  26   0   20.30    1.90
   2  26   0   21.10    1.80
   2  26   0   22.20    1.70
  -2  26   0   21.10    1.70
  -2  26   0   23.00    1.90
   2  26   0   21.70    1.70
   4 -26   0   24.40    1.80
  -4 -26   0   24.30    1.80
   4 -26   0   26.70    1.60
  -4 -26   0   23.20    1.80
  -4 -26   0   22.90    1.70
   4  26   0   25.10    1.60
  -4  26   0   23.60    1.90
  -4  26   0   24.50    1.90
  -4  26   0   21.10    1.70
  -1 -27   0   80.29    4.90
   1 -27   0   81.19    5.00
  -1 -27   0   83.29    4.90
   1 -27   0   70.59    4.80
  -1 -27   0   79.79    4.60
   1  27   0   82.39    4.80
   1  27   0   76.69    4.80
  -1  27   0   82.29    4.90
  -1  27   0   80.89    4.80
  -1  27   0   85.29    4.90
  -1  27   0   73.79    5.00
   1  27   0   82.69    4.80
  -3 -27   0   82.99    4.70
   3 -27   0   72.29    4.60
  -3 -27   0   76.59    4.70
   3 -27   0   74.79    4.70
  -3 -27   0   78.29    4.60
  -3  27   0   80.79    4.70
  -3  27   0   79.19    4.60
   3  27   0   80.59    4.50
  -3  27   0   80.69    4.70
   0 -28   0  104.79    6.00
   0 -28   0   92.59    6.00
   0  28   0   96.79    5.90
   0  28   0  104.09    5.90
   0  28   0  110.69    5.90
  10   0  -1   13.10    1.40
  10   0  -1    9.60    1.10
  -8   0   1    1.70    1.00
  -8   0   1    0.20    0.80
  -8   0   1    1.30    0.80
   8   0  -1    2.30    1.20
  -8   0   1    1.80    1.50
  -8   0   1    1.10    1.20
  -6   0   1   -0.10    0.40
  -6   0   1    0.60    0.90
  -6   0   1    0.30    0.70
  -6   0   1    0.80    1.00
  -4   0   1    1.10    0.70
  -4   0   1    0.60    0.70
  -4   0   1    1.10    0.60
  -4   0   1    1.00    0.40
   4   0  -1    0.80    0.60
   4   0  -1    0.70    0.30
  -2   0   1    0.20    0.50
   2   0  -1    1.20    0.40
   2   0  -1    1.00    0.30
  -2   0   1    1.20    0.40
  -2   0   1    1.90    0.70
   0   0   1    0.60    0.20
   0   0   1    1.00    0.20
   0   0  -1    0.50    0.10
  -2   0  -1    1.70    0.30
  -2   0  -1    1.30    0.30
   4   0   1    1.90    0.80
  -4   0  -1    0.90    0.70
  -4   0  -1    2.50    0.60
  -4   0  -1    1.70    0.60
   6   0   1    3.10    0.60
  -6   0  -1    3.80    1.30
  -8   0  -1    4.90    0.90
  -8   0  -1    9.00    2.30
   8   0   1    5.20    0.80
   8   0   1    4.10    0.50
  10   0   1    2.80    0.70
  10   0   1    3.40    0.90
  10   0   1    4.70    0.70
  11  -1  -1  124.39    6.50
  11  -1  -1  122.99    6.70
  11  -1  -1  121.69    6.60
 -11  -1   1  103.69    7.20
  11  -1  -1  128.19    7.80
 -11  -1   1  110.49    7.80
  11   1  -1  110.09    7.50
  11   1  -1  111.59    6.50
  11   1  -1  103.29    6.70
  11   1  -1  109.99    6.60
  11   1  -1  116.49    6.60
 -11   1   1  110.09    7.30
 -11   1   1  106.39    7.70
  -9  -1   1  237.38   14.40
   9  -1  -1  261.97   14.10
  -9  -1   1  240.28   15.20
  -9  -1   1  230.68   16.90
   9  -1  -1  246.68   13.70
   9  -1  -1  233.78   13.60
   9  -1  -1  264.57   13.80
  -9  -1   1  240.48   15.30
  -9  -1   1  220.78   18.00
   9  -1  -1  248.38   14.30
   9  -1  -1  277.47   15.00
   9  -1  -1  269.27   13.90
   9   1  -1  250.97   14.90
  -9   1   1  248.58   14.40
   9   1  -1  248.78   13.70
   9   1  -1  234.28   14.00
  -9   1   1  263.97   15.30
   9   1  -1  218.58   13.80
  -9   1   1  231.68   16.60
  -9   1   1  220.38   14.80
   9   1  -1  280.47   15.00
  -7  -1   1  463.65   27.10
   7  -1  -1  419.26   24.70
  -7  -1   1  426.06   24.90
   7  -1  -1  481.75   24.30
  -7  -1   1  399.86   26.80
   7  -1  -1  444.16   24.90
   7  -1  -1  417.26   24.10
  -7  -1   1  434.06   25.40
  -7   1   1  398.66   24.30
   7   1  -1  488.05   25.00
   7   1  -1  485.95   24.90
   7   1  -1  427.06   24.10
  -7   1   1  417.56   25.10
   7   1  -1  428.36   24.30
  -7   1   1  436.16   27.10
  -7   1   1  448.96   26.70
   5  -1  -1 1176.88   72.09
   5   1  -1 1250.37   73.79
   3  -1  -1 1506.45   87.79
   3   1  -1 1585.34   88.79
   1  -1  -1 3237.58  166.48
   1   1  -1 2850.11  166.78
   1   1   1 3504.65  193.48
   3  -1   1 1428.76   84.29
   3   1   1 1611.84   85.69
   5   1   1  599.54   34.20
  -5   1  -1  650.33   35.00
   7  -1   1  371.86   21.60
   7  -1   1  379.46   21.60
  -7  -1  -1  364.96   21.80
  -7  -1  -1  398.06   22.30
   7  -1   1  401.86   21.90
  -7  -1  -1  403.46   24.40
  -7  -1  -1  396.66   23.40
   7  -1   1  394.06   21.60
   7  -1   1  397.06   21.70
   7   1   1  442.66   21.90
  -7   1  -1  392.16   22.20
  -7   1  -1  381.46   23.20
   7   1   1  406.16   22.00
   9  -1   1  128.49    7.50
   9  -1   1  120.79    7.30
  -9  -1  -1  126.49    9.00
  -9  -1  -1  124.39    7.80
   9  -1   1  126.19    7.60
  -9  -1  -1  131.69   10.60
   9  -1   1  133.99    8.30
  -9  -1  -1  133.39    8.60
   9  -1   1  125.39    7.40
   9  -1   1  113.09    7.30
  -9   1  -1  140.49    8.60
   9   1   1  125.59    8.20
  -9   1  -1  130.99    7.80
   9   1   1  133.39    8.60
  -9   1  -1  142.89    9.10
   9   1   1  127.39    7.30
   9   1   1  123.49    7.70
  -9   1  -1  134.69   10.30
  11  -1   1  182.18    9.80
  11  -1   1  192.48    9.70
  11  -1   1  180.88   10.50
  11  -1   1  185.38    9.90
  11  -1   1  177.98    9.90
 -11  -1  -1  160.48   10.80
  11  -1   1  186.88   11.00
  11   1   1  174.68    9.90
  11   1   1  184.78   10.50
  11   1   1  162.88    9.70
  11   1   1  174.88    9.70
  11   1   1  162.38   10.80
  11   1   1  156.18    9.80
 -11   1  -1  169.68   10.90
  10  -2  -1  114.69    6.60
 -10  -2   1  106.39    8.00
 -10  -2   1  104.09    8.10
  10  -2  -1  133.29    7.90
  10  -2  -1  123.29    6.80
  10  -2  -1  103.29    6.80
  10  -2  -1  106.49    7.90
 -10  -2   1  115.19    7.50
  10  -2  -1  124.69    6.70
 -10   2   1  127.49    7.60
  10   2  -1  128.69    7.90
  10   2  -1  120.39    6.70
 -10   2   1  116.39    8.10
  10   2  -1  102.69    6.80
  10   2  -1  123.09    7.00
  10   2  -1  113.39    6.60
  10   2  -1  117.59    7.70
  10   2  -1  115.69    6.80
  -8  -2   1  405.76   24.20
   8  -2  -1  446.16   24.10
  -8  -2   1  436.66   27.30
   8  -2  -1  467.25   24.20
   8  -2  -1  396.16   23.10
   8  -2  -1  450.45   23.80
   8  -2  -1  387.06   23.20
  -8  -2   1  423.76   26.60
  -8  -2   1  390.46   24.50
  -8   2   1  432.36   24.20
  -8   2   1  420.16   25.70
  -8   2   1  404.16   26.80
   8   2  -1  415.86   24.00
  -8   2   1  412.66   23.40
   8   2  -1  372.06   23.20
  -8   2   1  427.96   24.20
   8   2  -1  424.06   23.10
  -6  -2   1  503.85   30.30
  -6   2   1  503.85   28.70
  -6   2   1  521.85   30.10
   4  -2  -1 1008.60   62.09
   4   2  -1 1112.19   64.69
   2  -2  -1 1917.71  117.09
   2   2  -1 2323.27  119.09
   0   2   1  190.48   11.30
   2   2   1  340.97   23.00
   4   2   1  969.00   57.69
   6  -2   1  335.97   18.80
  -6  -2  -1  349.47   20.70
  -6  -2  -1  334.67   18.90
  -6  -2  -1  375.86   20.40
  -6  -2  -1  356.26   21.20
  -6   2  -1  313.67   20.20
  -6   2  -1  302.77   19.00
  -6   2  -1  386.56   20.70
  -6   2  -1  337.37   20.00
  -8  -2  -1  155.98   13.00
   8  -2   1  195.68   10.60
  -8  -2  -1  193.08   13.50
   8  -2   1  171.28   10.00
   8  -2   1  193.88   10.90
   8  -2   1  172.98   10.10
  -8  -2  -1  165.28   11.80
  -8  -2  -1  165.88   10.30
   8  -2   1  178.28   10.30
   8  -2   1  174.18    9.90
   8  -2   1  188.98   10.30
  -8  -2  -1  166.88   10.90
   8   2   1  195.58   11.10
  -8   2  -1  172.38   10.30
  -8   2  -1  174.88   11.60
  -8   2  -1  180.98   10.80
   8   2   1  188.78   10.30
  -8   2  -1  187.88   12.70
   8   2   1  160.98   10.30
 -10  -2  -1   43.60    3.50
  10  -2   1   43.00    4.20
 -10  -2  -1   43.70    4.00
  10  -2   1   44.90    3.10
 -10  -2  -1   44.50    4.20
  10  -2   1   45.80    2.90
  10  -2   1   40.70    3.00
  10  -2   1   49.40    3.20
  10   2   1   48.10    3.80
 -10   2  -1   53.29    4.10
  10   2   1   50.39    3.10
  10   2   1   51.39    3.30
 -10   2  -1   48.30    3.60
  10   2   1   47.20    2.90
  11  -3  -1   58.89    3.20
 -11  -3   1   50.89    4.00
  11  -3  -1   54.99    4.40
 -11  -3   1   50.59    4.40
  11  -3  -1   56.49    3.40
  11  -3  -1   49.50    3.10
  11   3  -1   50.89    3.30
 -11   3   1   61.69    4.50
 -11   3   1   61.29    4.20
  11   3  -1   47.60    3.30
  11   3  -1   49.50    3.20
   9  -3  -1   34.30    3.10
  -9  -3   1   33.90    5.20
  -9  -3   1   31.00    4.70
   9  -3  -1   38.90    2.60
   9  -3  -1   33.00    2.20
   9  -3  -1   35.60    3.20
  -9  -3   1   31.00    2.90
  -9  -3   1   29.30    3.50
  -9  -3   1   26.80    3.30
   9  -3  -1   38.00    2.30
   9   3  -1   35.20    3.20
   9   3  -1   31.90    2.50
  -9   3   1   34.60    3.10
  -9   3   1   31.50    4.20
   9   3  -1   28.80    3.10
   9   3  -1   30.50    2.40
  -9   3   1   30.70    3.30
   7  -3  -1   69.09    4.70
  -7  -3   1   63.59    5.10
   7  -3  -1   68.49    4.80
   7  -3  -1   60.69    4.00
  -7  -3   1   64.89    4.70
  -7  -3   1   71.99    6.70
   7  -3  -1   60.89    3.90
  -7  -3   1   64.69    6.30
   7  -3  -1   63.29    4.70
  -7  -3   1   62.69    4.20
   7  -3  -1   64.19    3.80
   7   3  -1   61.19    4.00
  -7   3   1   62.59    6.10
   7   3  -1   59.89    5.00
  -7   3   1   58.69    4.10
   7   3  -1   67.89    4.50
   7   3  -1   59.99    3.90
   7   3  -1   54.69    4.40
  -7   3   1   67.59    4.60
  -7   3   1   67.39    5.80
  -7   3   1   61.29    4.50
   7   3  -1   61.39    4.30
  -5  -3   1  384.86   22.00
   5  -3  -1  374.86   20.60
  -5  -3   1  381.46   22.20
  -5   3   1  357.06   21.70
  -5   3   1  343.37   20.60
   3  -3  -1 1592.84   95.99
   3   3  -1 1841.62   99.29
   1  -3  -1 1296.17   80.19
   1   3  -1 1614.84   82.39
   1   3   1  569.54   31.80
  -3  -3  -1   14.20    1.20
  -3  -3  -1   14.30    1.60
  -3  -3  -1   13.90    1.40
  -3   3  -1   16.60    0.90
  -3   3  -1   13.50    0.90
  -5  -3  -1  300.97   17.70
  -5   3  -1  298.47   16.60
   5   3   1  289.17   16.50
   5   3   1  298.37   17.00
  -5   3  -1  286.97   17.20
  -5   3  -1  303.87   17.20
   7  -3   1  148.99    9.00
  -7  -3  -1  138.79   10.90
   7  -3   1  129.19    8.30
   7  -3   1  148.09    8.50
   7  -3   1  155.58    9.10
   7  -3   1  134.09    8.30
  -7  -3  -1  166.58   11.60
  -7  -3  -1  163.58    9.20
  -7  -3  -1  167.08   10.30
   7  -3   1  150.88    8.60
   7  -3   1  133.49    8.60
  -7  -3  -1  149.29    8.60
   7   3   1  150.78    8.60
  -7   3  -1  141.09    8.60
  -7   3  -1  140.79    8.80
  -7   3  -1  151.18   10.40
  -7   3  -1  141.29    9.60
   7   3   1  152.18    8.70
   7   3   1  160.08    9.20
   7   3   1  160.68    9.20
  -9  -3  -1   19.50    4.20
  -9  -3  -1   23.80    3.20
   9  -3   1   30.40    2.20
   9  -3   1   28.50    1.80
   9  -3   1   25.70    2.00
   9  -3   1   30.10    2.40
   9  -3   1   29.20    2.80
  -9  -3  -1   24.40    2.90
   9  -3   1   28.70    2.20
  -9  -3  -1   22.70    2.30
   9   3   1   28.90    2.30
   9   3   1   27.10    2.80
  -9   3  -1   28.60    2.40
   9   3   1   23.50    2.10
   9   3   1   32.30    2.80
  -9   3  -1   25.60    3.60
   9   3   1   24.80    2.00
   9   3   1   25.60    1.90
  -9   3  -1   27.60    2.80
 -11  -3  -1   61.89    5.10
  11  -3   1   75.39    4.80
  11  -3   1   77.69    4.20
  11   3   1   69.59    4.80
  11   3   1   71.49    4.30
 -11   3  -1   74.39    5.20
 -11   3  -1   71.69    4.80
  11   3   1   66.79    5.10
  11   3   1   65.49    4.10
  11   3   1   70.79    4.10
  10  -4  -1  111.59    6.50
  10  -4  -1  116.29    6.60
  10  -4  -1  117.89    6.80
 -10  -4   1   99.99    8.00
  10  -4  -1  122.59    6.90
  10  -4  -1  114.59    7.00
  10  -4  -1  116.09    6.80
 -10  -4   1  111.89    8.10
 -10  -4   1  118.89    7.40
  10  -4  -1  112.19    8.00
  10   4  -1  107.49    6.90
  10   4  -1  117.99    6.60
 -10   4   1  123.99    8.10
  10   4  -1  120.59    7.70
 -10   4   1  120.39    7.50
  10   4  -1  119.99    6.70
  10   4  -1  108.09    6.70
   8  -4  -1  426.96   24.00
  -8  -4   1  439.36   25.70
  -8  -4   1  459.95   25.30
  -8  -4   1  477.65   28.30
   8  -4  -1  392.96   23.90
   8  -4  -1  416.06   23.70
   8  -4  -1  429.66   24.60
  -8  -4   1  380.36   27.40
  -8   4   1  464.75   26.50
   8   4  -1  420.76   24.70
  -8   4   1  400.16   24.20
   8   4  -1  457.95   24.00
   8   4  -1  443.46   24.10
  -8   4   1  470.85   25.10
  -6  -4   1  412.06   24.80
  -6  -4   1  453.25   25.30
   6   4  -1  402.06   23.60
  -6   4   1  398.86   22.80
  -6   4   1  393.36   24.40
  -6   4   1  382.56   22.40
   4  -4  -1 1353.26   80.49
   4   4  -1 1479.25   85.39
   2  -4  -1  536.85   33.10
   2   4  -1  596.94   36.40
   0   4   1 6579.54  363.26
   2   4   1  686.83   44.40
   4   4   1 1085.39   65.89
   6  -4   1  430.06   22.30
  -6  -4  -1  400.16   24.60
  -6  -4  -1  390.36   24.00
  -6  -4  -1  421.76   23.60
   6   4   1  389.26   22.90
   6   4   1  389.66   22.30
  -6   4  -1  362.66   22.90
  -6   4  -1  422.06   23.40
   8  -4   1   70.49    4.40
   8  -4   1   79.19    5.00
  -8  -4  -1   77.49    6.20
   8  -4   1   79.29    5.70
  -8  -4  -1   69.19    5.20
   8  -4   1   71.29    4.20
  -8  -4  -1   62.19    7.00
   8  -4   1   65.89    4.10
  -8  -4  -1   67.19    7.00
   8  -4   1   66.19    4.30
  -8  -4  -1   69.99    4.60
   8  -4   1   61.49    4.20
  -8   4  -1   71.09    5.30
   8   4   1   72.59    4.40
  -8   4  -1   60.39    4.40
   8   4   1   72.69    5.00
  -8   4  -1   72.69    6.20
   8   4   1   61.59    4.50
   8   4   1   77.09    5.10
  -8   4  -1   67.69    4.80
  10  -4   1  220.68   12.50
  10  -4   1  231.38   12.70
  10  -4   1  208.98   12.70
  10  -4   1  241.08   13.50
 -10  -4  -1  237.18   14.00
 -10  -4  -1  205.98   14.10
  10  -4   1  219.68   12.80
  10  -4   1  200.68   13.90
 -10  -4  -1  240.28   13.10
  10   4   1  224.78   12.50
  10   4   1  220.28   12.60
  10   4   1  219.28   12.70
 -10   4  -1  258.37   13.90
  10   4   1  224.58   13.50
  10   4   1  218.18   12.80
  10   4   1  247.58   13.90
 -11  -5   1   -0.40    0.70
 -11  -5   1    0.40    1.10
  11  -5  -1    0.70    0.50
  11  -5  -1    0.30    0.40
  11  -5  -1    0.70    1.10
  11  -5  -1    0.40    0.30
  11   5  -1    0.40    0.80
  11   5  -1    0.80    0.60
 -11   5   1   -1.60    1.10
  11   5  -1    0.10    0.40
  11   5  -1    0.90    0.40
 -11   5   1    1.00    0.80
   9  -5  -1   58.19    3.80
   9  -5  -1   55.29    3.50
  -9  -5   1   54.89    6.60
  -9  -5   1   53.89    6.90
   9  -5  -1   58.99    3.60
  -9  -5   1   52.79    5.00
   9  -5  -1   55.69    5.00
  -9  -5   1   59.69    4.20
  -9  -5   1   60.39    5.00
   9  -5  -1   61.69    4.50
   9  -5  -1   59.59    4.40
   9  -5  -1   58.59    3.70
  -9   5   1   61.19    4.80
   9   5  -1   57.89    3.70
   9   5  -1   50.69    4.30
   9   5  -1   58.69    4.40
  -9   5   1   69.79    6.00
   9   5  -1   49.10    3.80
   7  -5  -1   43.20    3.00
   7  -5  -1   52.29    4.10
   7  -5  -1   47.90    3.90
   7  -5  -1   43.20    3.10
  -7  -5   1   51.39    4.00
  -7  -5   1   40.60    5.20
   7  -5  -1   48.60    3.20
   7  -5  -1   52.89    3.80
   7  -5  -1   48.50    3.10
   7  -5  -1   43.00    3.00
  -7  -5   1   43.60    5.50
   7  -5  -1   53.29    3.40
  -7  -5   1   45.90    4.30
  -7  -5   1   47.10    3.40
  -7   5   1   45.70    3.40
  -7   5   1   48.10    4.60
   7   5  -1   49.00    3.30
  -7   5   1   49.50    5.50
  -7   5   1   54.09    3.80
   7   5  -1   46.00    4.20
   7   5  -1   46.60    3.10
   7   5  -1   48.30    3.50
  -5  -5   1   96.09    6.00
   5  -5  -1   95.59    5.80
  -5  -5   1  103.49    7.60
  -5  -5   1   86.09    5.60
  -5  -5   1   89.89    6.40
  -5  -5   1  100.69    7.30
   5   5  -1  101.49    6.60
  -5   5   1   97.79    7.10
  -5   5   1  107.39    6.80
  -5   5   1   83.49    5.70
   5   5  -1   94.99    5.90
  -5   5   1   93.09    5.80
  -3  -5   1   86.59    5.70
  -3  -5   1   87.49    6.30
  -3  -5   1   95.49    6.10
  -3  -5   1   84.59    5.60
  -3   5   1   95.19    5.80
   3   5  -1   83.69    5.40
  -3   5   1  100.59    6.30
   3   5  -1   91.29    6.10
   3   5  -1   86.19    5.30
   3   5  -1   91.19    5.70
   3   5  -1   91.79    5.80
   1   5  -1 1690.83   96.59
  -3  -5  -1   60.59    4.40
  -3  -5  -1   53.69    3.30
  -3  -5  -1   58.29    3.90
   3   5   1   57.09    3.40
   3   5   1   50.59    3.60
   3   5   1   60.69    4.30
   3   5   1   58.39    3.80
   3   5   1   51.19    3.40
  -5  -5  -1    0.10    0.90
  -5  -5  -1    1.30    1.00
  -5  -5  -1    0.80    0.50
  -5   5  -1    2.80    0.70
  -5   5  -1    2.30    0.50
   5   5   1    1.40    0.50
  -5   5  -1    1.60    0.70
   5   5   1    1.40    0.90
  -5   5  -1    2.10    0.80
   5   5   1    1.60    0.70
  -7  -5  -1    9.70    2.50
   7  -5   1    5.70    1.30
   7  -5   1    7.30    1.10
   7  -5   1    7.10    1.00
  -7  -5  -1    7.40    2.70
  -7  -5  -1    7.20    2.40
   7  -5   1    4.70    0.80
  -7  -5  -1    6.60    1.10
   7  -5   1    6.20    1.60
   7  -5   1    5.20    0.80
   7  -5   1    5.00    0.80
   7  -5   1    5.90    1.00
  -7  -5  -1    6.90    1.40
   7  -5   1    6.00    1.70
  -7   5  -1    7.20    1.00
  -7   5  -1    6.50    1.40
   7   5   1    4.00    1.10
  -7   5  -1    8.50    2.00
   7   5   1    6.30    1.00
   7   5   1    5.20    0.80
   7   5   1    5.70    1.00
   7   5   1    6.70    1.30
   9  -5   1   29.30    2.50
   9  -5   1   27.40    2.10
   9  -5   1   23.20    2.10
   9  -5   1   24.30    2.60
  -9  -5  -1   22.40    4.30
  -9  -5  -1   26.90    3.40
   9  -5   1   23.40    1.70
  -9  -5  -1   25.00    2.30
   9  -5   1   24.50    3.30
   9  -5   1   22.40    1.90
  -9  -5  -1   25.70    2.90
  -9  -5  -1   25.60    4.40
   9  -5   1   26.00    1.90
   9  -5   1   26.60    2.10
  -9   5  -1   27.80    2.40
  -9   5  -1   27.20    2.60
   9   5   1   28.50    2.20
   9   5   1   25.80    2.70
  -9   5  -1   30.30    3.50
  -9   5  -1   27.30    2.40
   9   5   1   25.80    2.60
   9   5   1   25.00    1.90
   9   5   1   22.20    2.00
  11  -5   1   10.60    1.90
 -11  -5  -1   10.80    1.60
  11  -5   1   11.60    1.10
 -11  -5  -1   11.80    1.80
  11  -5   1   10.60    1.10
  11  -5   1    9.40    1.10
  11  -5   1   10.00    0.90
  11   5   1    9.40    0.80
  11   5   1    8.10    1.20
  11   5   1   10.20    1.10
  11   5   1    8.60    1.70
 -11   5  -1    8.90    1.70
  11   5   1    9.10    1.00
 -10  -6   1  103.49    8.20
  10  -6  -1  117.09    6.80
  10  -6  -1  116.39    7.00
  10  -6  -1  130.19    7.40
 -10  -6   1  138.09    8.50
  10  -6  -1  118.09    7.00
  10  -6  -1  120.39    7.00
  10  -6  -1  113.99    6.80
  10   6  -1  104.69    7.00
  10   6  -1  125.49    7.90
 -10   6   1  134.39    8.30
   8  -6  -1  389.06   20.80
   8  -6  -1  349.07   20.90
   8  -6  -1  381.46   21.60
   8  -6  -1  403.56   21.70
  -8  -6   1  373.26   25.00
  -8  -6   1  374.36   24.90
   8  -6  -1  351.16   20.60
   8   6  -1  362.96   20.80
   8   6  -1  343.77   21.50
  -8   6   1  394.26   21.90
   8   6  -1  417.56   21.70
   8   6  -1  348.57   22.40
  -8   6   1  381.56   23.10
   8   6  -1  378.16   21.40
  -8   6   1  387.16   21.20
   6  -6  -1  235.88   15.40
  -6  -6   1  294.17   16.30
   6  -6  -1  235.18   14.90
   6  -6  -1  259.37   14.80
  -6  -6   1  299.67   18.00
   6  -6  -1  253.37   14.70
  -6  -6   1  265.37   17.40
  -6  -6   1  282.97   15.00
   6  -6  -1  252.07   15.00
  -6  -6   1  297.57   15.70
   6  -6  -1  270.37   15.50
   6   6  -1  253.77   15.30
  -6   6   1  265.37   15.40
  -6   6   1  282.07   17.50
  -6   6   1  280.67   16.40
   6   6  -1  262.27   16.20
   4   6  -1 1018.50   65.59
  -2  -6   1    6.00    1.20
   2  -6  -1    5.80    0.60
  -2  -6   1    5.70    1.40
   2  -6  -1    6.90    0.60
  -2  -6   1    5.20    0.80
   2   6  -1    6.70    1.20
  -2   6   1    5.10    1.00
   2   6  -1    7.60    1.00
  -2   6   1    5.40    1.60
   2   6  -1    6.20    0.70
   2   6  -1    5.60    0.60
   0   6   1 3218.78  185.68
   2  -6   1   17.60    1.00
   2  -6   1   16.70    1.10
  -2  -6  -1   16.10    1.90
   2   6   1   19.50    1.60
   2   6   1   15.20    1.40
   2   6   1   14.10    1.30
   2   6   1   17.00    2.30
   2   6   1   15.00    1.20
   2   6   1   16.70    1.90
   4   6   1  680.13   46.50
   6  -6   1  559.24   30.90
   6  -6   1  578.64   30.70
   6  -6   1  596.34   31.50
   6  -6   1  619.54   32.00
   6  -6   1  582.24   30.90
  -6  -6  -1  602.64   33.30
   6  -6   1  539.55   30.80
  -6  -6  -1  617.64   34.00
  -6   6  -1  522.95   31.40
   6   6   1  576.34   31.80
   6   6   1  558.84   30.80
  -6   6  -1  514.25   30.80
   6   6   1  503.25   31.50
   6   6   1  520.25   30.90
  -8  -6  -1  136.99   12.00
  -8  -6  -1  140.09    9.00
   8  -6   1  168.98   10.40
   8  -6   1  170.38    9.60
  -8  -6  -1  154.08    9.70
   8  -6   1  159.18    8.60
   8  -6   1  161.78    8.90
   8  -6   1  150.68    8.80
   8  -6   1  154.68    8.80
   8  -6   1  138.99    8.60
   8  -6   1  148.99    8.60
  -8  -6  -1  142.09   10.50
   8   6   1  161.68    9.50
   8   6   1  157.88    8.90
  -8   6  -1  149.19   10.40
  -8   6  -1  139.09    9.20
   8   6   1  134.29    8.60
   8   6   1  149.59    9.40
   8   6   1  157.48    9.00
  10  -6   1  167.08   11.70
 -10  -6  -1  174.88   11.90
  10  -6   1  209.48   11.20
  10  -6   1  175.58   10.50
  10  -6   1  184.38   10.50
  10  -6   1  189.08   10.40
  10  -6   1  188.38   10.20
 -10  -6  -1  194.08   11.70
  10  -6   1  169.88   10.50
  10  -6   1  190.08   10.30
 -10  -6  -1  196.48   10.90
  10   6   1  185.18   11.40
  10   6   1  173.18   10.30
 -10   6  -1  198.68   11.50
  10   6   1  185.28   10.30
  10   6   1  165.38   11.00
  10   6   1  209.18   10.70
  10   6   1  165.88   10.50
  11  -7  -1   13.40    0.90
  11  -7  -1   10.00    1.10
  11  -7  -1   11.60    1.00
  11  -7  -1   12.70    1.20
  11  -7  -1   12.60    1.20
  11  -7  -1   10.10    1.90
  11   7  -1   11.50    1.70
 -11   7   1   14.20    1.90
  11   7  -1   13.40    1.10
  11   7  -1   13.30    1.00
   9  -7  -1   59.19    3.80
   9  -7  -1   66.29    4.00
   9  -7  -1   66.79    3.70
   9  -7  -1   61.99    5.30
  -9  -7   1   55.89    5.20
  -9  -7   1   58.69    5.00
  -9  -7   1   62.99    4.30
   9  -7  -1   59.39    3.90
  -9  -7   1   53.59    6.90
   9  -7  -1   61.99    4.50
   9  -7  -1   55.39    3.60
  -9  -7   1   53.59    6.60
   9   7  -1   54.09    3.90
   9   7  -1   57.19    3.80
  -9   7   1   61.29    5.60
  -9   7   1   61.79    4.90
  -9   7   1   60.29    4.50
   9   7  -1   50.59    4.20
   9   7  -1   63.79    4.60
   7  -7  -1  158.68    9.70
  -7  -7   1  184.78   11.50
   7  -7  -1  167.18    9.90
   7  -7  -1  162.88   10.60
  -7  -7   1  193.18   13.40
   7  -7  -1  186.78    9.90
   7  -7  -1  183.98   10.60
  -7  -7   1  178.48   10.80
   7  -7  -1  179.18    9.70
  -7  -7   1  178.08   10.10
   7  -7  -1  157.98    9.60
   7  -7  -1  168.28    9.70
  -7  -7   1  166.28   13.10
   7  -7  -1  149.99    9.80
   7   7  -1  170.08   11.40
  -7   7   1  179.18   10.70
  -7   7   1  179.78   10.20
   7   7  -1  171.28    9.90
   7   7  -1  158.18   10.30
  -7   7   1  188.98   11.80
  -5  -7   1  646.64   35.30
   5   7  -1  565.74   33.20
   5   7  -1  545.85   33.90
  -5   7   1  641.84   35.20
  -3  -7   1  142.49    8.60
  -3  -7   1  144.29    9.00
  -3  -7   1  131.99    7.70
   3  -7  -1  132.49    7.80
  -3  -7   1  133.49    8.00
  -3  -7   1  132.59    8.10
   3   7  -1  131.29    8.30
  -3   7   1  136.39    7.80
   3   7  -1  120.89    8.50
   3   7  -1  121.19    7.50
   3   7  -1  131.39    7.80
  -3   7   1  152.28    9.40
   3   7  -1  123.49    7.80
   3   7  -1  124.89    8.10
   1   7  -1 3022.10  170.68
  -1  -7  -1  115.69    7.00
  -1  -7  -1  120.09    7.10
  -1  -7  -1  125.09    7.60
  -1   7  -1  111.59    7.80
   1   7   1  138.39    8.00
  -1   7  -1  116.89    7.30
  -1   7  -1  111.09    7.00
   1   7   1  137.49    7.40
  -1   7  -1  118.29    7.00
   3   7   1  983.10   63.49
  -5  -7  -1    2.50    0.70
  -5  -7  -1    3.60    1.60
  -5  -7  -1    4.10    1.40
  -5  -7  -1    1.70    1.20
  -5  -7  -1    1.60    0.50
  -5   7  -1    2.50    0.70
   5   7   1    2.40    0.60
  -5   7  -1    4.30    1.10
   5   7   1    2.70    1.00
   7  -7   1  168.68    9.20
   7  -7   1  159.18    9.10
   7  -7   1  147.19    9.00
  -7  -7  -1  149.99    9.80
   7  -7   1  163.18    9.00
   7  -7   1  169.48    9.20
  -7  -7  -1  154.08   12.30
   7  -7   1  169.48    9.50
  -7  -7  -1  143.99   10.60
   7  -7   1  171.28    9.80
   7  -7   1  156.38    8.90
   7  -7   1  171.48    9.90
  -7  -7  -1  148.19   11.70
  -7  -7  -1  145.59    9.20
  -7   7  -1  152.08   10.40
   7   7   1  143.99    9.00
   7   7   1  174.58    9.80
   7   7   1  153.18    9.40
   7   7   1  178.88   10.90
   7   7   1  154.88   10.10
  -7   7  -1  142.59    9.30
   7   7   1  156.88    9.30
   7   7   1  170.68    9.20
   9  -7   1   22.00    1.90
   9  -7   1   18.20    1.90
   9  -7   1   20.00    1.90
   9  -7   1   24.10    1.80
   9  -7   1   17.80    3.10
  -9  -7  -1   28.00    3.40
  -9  -7  -1   27.20    4.50
   9  -7   1   21.10    1.60
   9  -7   1   22.90    2.30
   9  -7   1   20.80    1.80
   9  -7   1   23.70    2.40
   9   7   1   21.60    2.50
   9   7   1   26.40    2.10
   9   7   1   20.40    1.80
  -9   7  -1   26.30    2.50
   9   7   1   20.50    2.20
  11  -7   1   29.40    2.00
  11  -7   1   28.50    1.80
  11  -7   1   28.90    3.00
 -11  -7  -1   27.30    2.40
  11  -7   1   32.10    1.90
  11  -7   1   28.80    2.00
 -11  -7  -1   29.20    3.00
  11   7   1   28.60    1.80
  11   7   1   27.80    2.00
 -11   7  -1   31.30    2.70
  11   7   1   25.80    2.60
  10  -8  -1  116.49    6.60
 -10  -8   1  110.99    7.00
  10  -8  -1  114.89    6.40
 -10  -8   1  115.49    7.70
  10  -8  -1  107.79    7.80
  10  -8  -1  111.59    6.80
 -10  -8   1  113.69    8.00
  10  -8  -1  107.29    6.50
  10  -8  -1  108.69    6.30
  10   8  -1  111.69    7.30
  10   8  -1   98.39    6.50
 -10   8   1  114.89    7.40
 -10   8   1  115.69    7.70
   8  -8  -1   17.30    1.80
   8  -8  -1   18.30    1.70
   8  -8  -1   15.20    1.50
  -8  -8   1   22.10    3.00
   8  -8  -1   18.00    2.20
  -8  -8   1   23.50    4.10
   8  -8  -1   17.80    3.00
   8  -8  -1   18.60    2.50
  -8  -8   1   26.40    4.50
   8  -8  -1   19.50    1.60
  -8  -8   1   24.00    2.70
   8  -8  -1   19.50    1.80
  -8  -8   1   22.60    2.10
   8   8  -1   18.40    2.00
   8   8  -1   15.20    1.70
   8   8  -1   18.00    2.60
   8   8  -1   19.30    1.60
   8   8  -1   15.30    1.90
   6  -8  -1  171.18   10.10
   6  -8  -1  174.58   10.20
  -6  -8   1  203.48   13.10
  -6  -8   1  172.38   10.90
   6  -8  -1  179.08   10.30
   6  -8  -1  181.08   10.30
   6  -8  -1  167.38   10.10
  -6  -8   1  179.58   11.50
   6  -8  -1  180.08   10.30
   6  -8  -1  179.78   10.10
   6  -8  -1  197.48   11.50
   6  -8  -1  173.58   10.90
  -6  -8   1  208.28   13.50
   6  -8  -1  187.98   10.90
   6  -8  -1  178.68   10.50
  -6  -8   1  170.58   10.40
  -6   8   1  178.68   13.30
  -6   8   1  190.98   11.70
   6   8  -1  187.98   11.90
  -6   8   1  167.38   10.80
   6   8  -1  191.78   10.80
  -6   8   1  169.48   10.50
  -4  -8   1  588.74   30.60
  -4  -8   1  536.75   31.60
   4   8  -1  523.65   30.50
  -4   8   1  595.44   32.30
   4   8  -1  532.75   30.10
   4   8  -1  479.15   29.60
  -2  -8   1  415.76   24.00
  -2   8   1  419.16   23.20
  -2   8   1  460.55   26.20
  -2   8   1  374.06   25.10
   0  -8   1   78.19    5.10
   0  -8  -1   85.09    5.20
   0  -8  -1   98.89    5.90
   0   8   1   83.69    5.60
   0   8  -1   99.59    5.50
   0   8   1   84.99    6.40
   0   8  -1   93.79    5.80
   0   8  -1   95.49    5.30
   0   8  -1   98.59    6.80
   0   8   1   82.59    5.40
   0   8  -1   75.19    6.10
   2  -8   1  158.88    8.30
  -2  -8  -1  135.99    8.80
  -2  -8  -1  142.89    8.40
  -2  -8  -1  154.38    9.00
  -2  -8  -1  133.39    9.30
  -2  -8  -1  138.39    8.60
   2   8   1  154.68    8.60
   2   8   1  157.88    9.60
  -2   8  -1  133.19    8.60
   2   8   1  154.28    9.90
   2   8   1  157.78    9.00
  -2   8  -1  143.29    8.50
   2   8   1  153.48    8.50
  -4  -8  -1  265.17   15.60
  -4  -8  -1  276.37   16.50
  -4  -8  -1  294.77   16.00
   4   8   1  254.27   15.00
   4   8   1  267.97   16.20
  -4   8  -1  239.88   14.70
   4   8   1  260.97   15.30
   4   8   1  271.17   14.80
   4   8   1  266.57   15.40
  -4   8  -1  238.68   14.60
  -6  -8  -1  161.98    8.70
   6  -8   1  135.89    8.40
   6  -8   1  146.69    8.50
  -6  -8  -1  166.78    9.20
   6  -8   1  139.29    8.50
  -6  -8  -1  159.98   11.00
   6  -8   1  149.49    8.70
   6  -8   1  147.59    9.10
   6  -8   1  157.68    8.70
   6  -8   1  142.69    9.30
   6  -8   1  151.48    8.70
   6  -8   1  150.18    9.60
   6  -8   1  136.59    8.90
   6   8   1  150.88    8.90
  -6   8  -1  170.38    9.70
   6   8   1  152.68   10.80
  -6   8  -1  141.99    8.70
   6   8   1  152.08    9.70
   8  -8   1  512.75   26.90
  -8  -8  -1  485.35   30.60
   8  -8   1  445.06   26.00
   8  -8   1  528.05   27.10
  -8  -8  -1  496.25   27.30
   8  -8   1  456.65   26.40
   8  -8   1  469.15   26.30
  -8  -8  -1  490.35   28.20
   8  -8   1  457.85   27.90
   8  -8   1  451.35   26.50
   8  -8   1  465.45   26.20
   8   8   1  512.25   27.00
   8   8   1  434.56   26.80
  -8   8  -1  519.45   28.00
  -8   8  -1  489.85   26.90
   8   8   1  460.85   26.30
   8   8   1  430.66   26.40
 -10  -8  -1   91.29    6.80
  10  -8   1   85.19    5.30
  10  -8   1   83.29    5.40
 -10  -8  -1   95.09    5.70
  10  -8   1   95.89    5.50
 -10  -8  -1  102.69    6.50
  10  -8   1   95.39    5.40
  10  -8   1   85.99    5.10
  10  -8   1   94.99    5.10
  10   8   1   88.99    5.40
  10   8   1   81.89    5.30
  10   8   1   84.59    5.10
  10   8   1   88.19    6.10
 -10   8  -1   78.99    6.00
 -10   8  -1   93.29    6.00
  10   8   1   91.79    5.10
  10   8   1   80.49    5.70
  11  -9  -1   92.59    5.20
  11  -9  -1   96.99    5.10
  11  -9  -1   90.39    5.00
  11  -9  -1   83.99    5.20
  11  -9  -1   82.49    5.90
  11   9  -1   87.19    5.90
  11   9  -1   86.99    5.10
  11   9  -1   98.89    5.10
   9  -9  -1   52.59    5.00
   9  -9  -1   60.29    3.90
   9  -9  -1   60.89    3.70
   9  -9  -1   59.29    4.40
   9  -9  -1   55.59    3.60
   9  -9  -1   61.99    3.90
   9  -9  -1   54.39    3.80
   9   9  -1   64.79    4.50
   9   9  -1   55.69    3.70
  -7  -9   1   16.10    3.80
   7  -9  -1   26.50    2.10
   7  -9  -1   26.50    1.90
   7  -9  -1   27.30    2.10
   7  -9  -1   27.80    3.30
  -7  -9   1   18.50    3.70
   7  -9  -1   25.30    2.90
   7  -9  -1   27.70    2.60
   7   9  -1   25.70    2.00
   7   9  -1   19.70    2.20
  -7   9   1   20.10    2.90
   5   9  -1 1669.43   91.39
  -5   9   1 1740.33   94.29
   5   9  -1 1607.34   91.89
  -3   9   1 1107.69   63.19
  -1  -9  -1  213.88   12.20
  -1  -9  -1  198.28   11.40
  -1  -9  -1  204.58   11.10
   1   9   1  207.28   11.40
  -1   9  -1  192.68   12.70
   1   9   1  184.48   11.10
   1   9   1  197.08   11.70
  -1   9  -1  190.48   11.40
   1   9   1  208.78   11.60
   1   9   1  196.18   12.40
  -1   9  -1  187.78   11.30
  -3  -9  -1  526.05   27.80
  -3  -9  -1  535.85   28.80
  -3   9  -1  459.85   27.20
  -3   9  -1  455.85   27.30
   3   9   1  486.55   27.00
   3   9   1  523.15   27.50
   3   9   1  524.85   27.90
  -3   9  -1  438.06   28.70
   5  -9   1  363.76   20.80
  -5  -9  -1  418.66   22.70
   5  -9   1  352.16   22.10
  -5  -9  -1  410.76   23.40
   5  -9   1  376.36   20.70
   5  -9   1  368.16   21.20
   5  -9   1  356.16   20.50
  -5  -9  -1  377.26   21.80
   5   9   1  380.86   22.80
   5   9   1  360.76   21.60
   5   9   1  344.17   20.80
   7  -9   1  677.43   36.20
  -7  -9  -1  655.53   38.90
   7  -9   1  652.33   36.20
   7  -9   1  648.84   35.90
   7  -9   1  639.04   35.70
   7  -9   1  613.84   37.10
  -7  -9  -1  679.03   37.40
  -7  -9  -1  693.43   39.70
   7   9   1  626.04   35.90
  -7   9  -1  650.83   36.00
   7   9   1  609.34   36.80
   9  -9   1  147.89   11.00
   9  -9   1  162.48   10.20
   9  -9   1  174.48    9.70
   9  -9   1  169.58    9.40
  -9  -9  -1  170.38   10.70
   9  -9   1  181.78    9.70
  -9  -9  -1  161.78    9.90
   9  -9   1  177.38    9.80
  -9  -9  -1  158.58   11.20
   9  -9   1  171.48    9.50
   9   9   1  170.48    9.70
   9   9   1  170.48   10.40
  -9   9  -1  175.48   10.20
  -9   9  -1  161.68   10.40
   9   9   1  157.28    9.80
  11  -9   1   37.40    2.20
  11  -9   1   34.10    2.10
  11  -9   1   36.60    2.20
  11  -9   1   36.10    2.10
  11  -9   1   32.70    3.00
  11   9   1   30.80    2.10
  11   9   1   34.40    2.00
  11   9   1   33.70    2.20
  11   9   1   29.50    2.70
  10 -10  -1   29.10    1.80
 -10 -10   1   32.10    2.90
  10 -10  -1   27.30    2.00
  10 -10  -1   28.00    1.90
  10 -10  -1   27.20    2.40
  10 -10  -1   25.00    2.10
  10  10  -1   27.10    2.00
  10  10  -1   28.40    2.60
 -10  10   1   28.10    3.30
  10  10  -1   25.50    1.90
 -10  10   1   30.90    3.10
  -8 -10   1    3.50    1.30
   8 -10  -1    5.00    1.00
   8 -10  -1    3.80    1.80
  -8 -10   1    5.80    2.00
  -8 -10   1    4.50    2.40
   8 -10  -1    4.60    1.50
   8 -10  -1    2.60    0.80
   8 -10  -1    4.60    0.90
   8 -10  -1    2.90    0.70
  -8 -10   1    5.10    2.30
   8 -10  -1    5.60    0.80
  -8  10   1    3.50    1.70
  -8  10   1    0.50    5.40
   8  10  -1    4.80    0.90
   8  10  -1    2.90    1.40
  -8  10   1    4.00    1.40
  -8  10   1    4.40    1.60
   8  10  -1    3.70    1.00
  -6 -10   1   10.30    1.40
   6 -10  -1   11.20    1.20
   6 -10  -1   11.00    2.30
  -6 -10   1   12.20    2.10
  -6 -10   1   12.40    3.00
   6 -10  -1   11.10    1.40
   6 -10  -1   13.40    1.40
  -6 -10   1    9.40    2.90
   6 -10  -1   12.50    2.00
  -6 -10   1   11.40    1.70
   6 -10  -1   12.40    1.00
   6 -10  -1   14.00    1.60
   6 -10  -1   11.90    1.30
   6 -10  -1   13.10    1.00
  -6  10   1   12.40    2.10
  -6  10   1   17.50    6.90
  -6  10   1   11.50    1.90
   6  10  -1   10.40    1.00
   6  10  -1   12.50    2.20
   6  10  -1   11.30    1.50
  -6  10   1   12.10    1.70
   6  10  -1   19.00    4.00
  -4 -10   1   58.89    4.10
  -4 -10   1   61.89    4.60
   4 -10  -1   57.49    3.70
  -4 -10   1   57.29    3.80
   4 -10  -1   64.89    4.10
  -4 -10   1   65.69    4.60
  -4 -10   1   64.89    5.30
  -4 -10   1   58.89    5.50
  -4  10   1   65.99    8.30
  -4  10   1   58.39    6.40
   4  10  -1   61.79    4.80
  -4  10   1   66.19    4.70
   4  10  -1   58.79    3.80
   4  10  -1   62.99    4.40
   4  10  -1   61.39    5.40
  -4  10   1   63.19    4.30
   4  10  -1   60.59    4.20
   4  10  -1   57.29    3.80
   4  10  -1   60.39    4.90
  -2 -10   1  300.87   18.60
  -2 -10   1  296.67   18.20
   2  10  -1  328.87   17.70
  -2  10   1  325.07   19.40
  -2  10   1  315.47   18.10
  -2  10   1  306.57   17.90
   2  10  -1  314.77   17.80
   2  10  -1  323.27   19.00
   0 -10   1  219.38   11.20
   0 -10   1  209.98   11.40
   0 -10  -1  186.08   11.20
   0 -10  -1  194.78   12.10
   0 -10   1  207.48   11.30
   0  10  -1  182.38   12.10
   0  10  -1  207.38   12.90
   0  10  -1  196.88   12.10
   0  10  -1  211.18   11.80
   0  10   1  205.88   13.10
   0  10   1  191.98   11.60
   0  10  -1  207.88   11.50
   0  10   1  186.08   11.50
  -2  10  -1  636.94   34.80
  -2  10  -1  619.14   34.50
  -2  10  -1  612.24   34.40
  -4 -10  -1  473.25   29.10
   4  10   1  528.25   28.70
   4  10   1  532.75   29.20
   6 -10   1   12.80    2.70
   6 -10   1   18.00    2.10
  -6 -10  -1   15.10    2.40
   6 -10   1   17.30    1.80
   6 -10   1   15.90    1.40
   6 -10   1   13.40    1.60
   6 -10   1   14.90    1.60
   6 -10   1   14.40    2.20
  -6 -10  -1   21.40    4.10
   6 -10   1   15.90    1.80
  -6 -10  -1   15.90    1.50
  -6 -10  -1   17.40    3.60
   6 -10   1   18.50    1.50
  -6 -10  -1   15.40    1.90
   6 -10   1   14.90    1.40
   6 -10   1   14.80    1.30
   6  10   1   15.10    1.60
   6  10   1   16.80    1.70
   6  10   1   12.90    1.30
  -6  10  -1   17.00    2.10
   6  10   1   16.80    2.90
  -6  10  -1   18.40    1.60
   6  10   1   15.90    2.10
   8 -10   1   32.40    2.90
   8 -10   1   34.40    2.60
   8 -10   1   32.50    2.30
   8 -10   1   32.20    2.50
   8 -10   1   28.20    2.50
   8 -10   1   34.40    3.10
   8 -10   1   31.70    2.20
  -8 -10  -1   34.40    2.60
  -8 -10  -1   38.30    5.30
   8 -10   1   26.90    3.80
  -8 -10  -1   30.70    4.50
  -8 -10  -1   35.80    3.80
  -8 -10  -1   36.70    3.30
   8 -10   1   30.20    2.50
  -8  10  -1   33.10    3.30
   8  10   1   27.30    2.60
   8  10   1   31.70    2.60
  -8  10  -1   34.50    3.00
   8  10   1   34.90    3.00
  -8  10  -1   29.80    8.20
   8  10   1   31.60    2.40
  10 -10   1   38.80    2.70
  10 -10   1   42.30    2.90
  10 -10   1   40.60    2.70
 -10 -10  -1   43.90    3.00
 -10 -10  -1   42.00    3.50
  10 -10   1   41.90    2.40
  10 -10   1   43.10    2.70
  10 -10   1   41.70    2.50
  10  10   1   35.50    2.60
  10  10   1   38.70    3.30
  10  10   1   42.70    2.80
  10  10   1   38.20    2.50
  10  10   1   34.60    2.80
 -10  10  -1   45.30    3.50
  11 -11  -1  134.89    7.30
  11 -11  -1  138.99    7.40
  11 -11  -1  132.99    7.30
  11  11  -1  135.79    7.30
  11  11  -1  115.39    7.90
   9 -11  -1   88.19    7.00
  -9 -11   1   91.39    6.90
   9 -11  -1   97.39    6.20
   9 -11  -1   90.59    5.40
  -9 -11   1   88.09    6.00
  -9 -11   1  101.79    6.70
   9 -11  -1   95.19    5.50
   9 -11  -1   98.69    5.70
   9 -11  -1   87.49    5.60
  -9  11   1  104.49    7.00
   9  11  -1   85.19    5.60
   9  11  -1  104.59    6.40
  -7 -11   1  130.29    8.30
   7 -11  -1  144.09    8.00
  -7 -11   1  140.49   11.30
   7 -11  -1  138.49    8.00
  -7 -11   1  131.79    9.50
  -7 -11   1  131.89   11.40
   7 -11  -1  134.79    8.90
   7 -11  -1  135.89    8.20
   7 -11  -1  148.99    9.80
   7 -11  -1  154.78    8.30
  -7 -11   1  132.29    8.90
   7  11  -1  151.98    8.90
   7  11  -1  133.89    9.90
  -7  11   1  126.89   14.90
  -7  11   1  145.99    9.80
  -7  11   1  128.59    9.00
  -7  11   1  139.09    8.80
   7  11  -1  144.79    9.90
  -5 -11   1  384.56   26.70
   5 -11  -1  436.66   23.50
   5 -11  -1  457.75   23.80
   5 -11  -1  406.16   23.40
   5 -11  -1  434.26   23.70
   5 -11  -1  469.25   23.70
  -5 -11   1  420.56   26.40
  -5 -11   1  420.96   24.20
   5 -11  -1  396.66   24.30
   5 -11  -1  403.76   24.90
   5 -11  -1  431.76   23.70
   5  11  -1  461.05   26.50
   5  11  -1  416.76   23.50
   5  11  -1  401.66   25.80
   5  11  -1  427.46   24.60
   5  11  -1  420.26   23.50
   5  11  -1  431.56   25.40
  -5  11   1  436.56   24.40
  -5  11   1  426.76   24.10
   5  11  -1  394.26   23.50
  -5  11   1  483.85   25.20
  -5  11   1  468.25   30.40
  -3 -11   1  215.98   12.90
  -3 -11   1  195.68   13.70
  -3 -11   1  201.38   13.30
  -3 -11   1  211.08   12.80
  -3  11   1  196.88   12.70
   3  11  -1  227.48   12.60
   3  11  -1  237.58   13.60
   3  11  -1  237.28   12.90
   3  11  -1  235.28   14.30
   3  11  -1  234.98   13.40
  -3  11   1  201.18   14.20
   3  11  -1  221.78   12.20
  -3  11   1  205.68   12.90
  -3  11   1  192.48   16.10
  -1 -11  -1  646.64   35.00
  -1  11  -1  568.64   33.90
  -1  11  -1  559.94   36.00
  -1  11  -1  661.83   36.10
   1  11   1  622.74   33.70
   1  11   1  634.04   35.80
  -3  11  -1  853.21   48.30
   3  11   1  916.31   48.80
  -5 -11  -1  840.82   44.90
   5 -11   1  814.72   41.70
   5 -11   1  761.22   42.20
   5 -11   1  786.82   43.20
   5 -11   1  710.53   41.90
   5 -11   1  732.43   41.50
   5 -11   1  752.82   42.00
  -5  11  -1  850.71   47.80
  -5  11  -1  728.13   41.80
   5  11   1  678.63   41.30
   5  11   1  802.32   44.30
   5  11   1  698.93   42.80
  -7 -11  -1  364.76   24.30
   7 -11   1  379.16   21.20
   7 -11   1  395.56   21.30
   7 -11   1  368.66   21.00
   7 -11   1  411.66   21.60
  -7 -11  -1  400.16   25.20
   7 -11   1  342.77   22.80
   7 -11   1  385.46   21.80
  -7 -11  -1  377.16   22.80
   7 -11   1  405.76   21.20
  -7 -11  -1  395.56   22.00
   7 -11   1  404.46   21.00
   7 -11   1  395.86   21.70
  -7  11  -1  400.86   21.90
   7  11   1  352.86   22.50
   7  11   1  351.06   21.30
   7  11   1  345.87   21.40
   7  11   1  354.76   21.20
  -7  11  -1  405.26   22.30
   9 -11   1  136.89    8.00
  -9 -11  -1  155.18    9.10
   9 -11   1  141.79    8.20
   9 -11   1  139.19    8.40
   9 -11   1  148.69    7.90
   9 -11   1  141.49    8.10
  -9 -11  -1  143.09    9.60
   9 -11   1  141.59    7.80
   9  11   1  145.39    8.80
   9  11   1  124.09    8.10
  -9  11  -1  121.09    8.70
   9  11   1  126.99    8.00
  10 -12  -1   68.69    3.90
  10 -12  -1   73.49    4.10
  10 -12  -1   63.99    4.90
  10 -12  -1   68.89    4.40
 -10  12   1   69.89    5.30
  10  12  -1   66.09    4.70
  10  12  -1   62.59    4.00
   8 -12  -1  135.19   10.10
   8 -12  -1  148.59    8.70
  -8 -12   1  160.28    9.00
  -8 -12   1  155.98    9.70
   8 -12  -1  157.38    8.50
  -8 -12   1  154.18   12.20
   8 -12  -1  148.09    8.70
   8 -12  -1  146.29    9.30
   8 -12  -1  141.59    8.50
   8  12  -1  135.99   10.40
  -8  12   1  169.78   10.10
  -8  12   1  159.88   10.50
   8  12  -1  140.79    9.20
   8  12  -1  142.59    8.70
  -6 -12   1   27.90    3.30
  -6 -12   1   28.40    2.70
   6 -12  -1   30.20    3.50
  -6 -12   1   33.30    2.50
   6 -12  -1   30.90    2.20
  -6 -12   1   34.30    3.00
   6 -12  -1   32.20    2.50
   6 -12  -1   35.60    3.30
   6 -12  -1   31.10    2.40
  -6 -12   1   33.60    4.40
   6 -12  -1   30.70    2.50
  -6 -12   1   26.20    4.20
   6 -12  -1   31.80    2.40
   6 -12  -1   34.80    2.20
  -6  12   1   29.20    3.30
  -6  12   1   43.30   10.40
   6  12  -1   28.40    2.10
  -6  12   1   30.40    3.40
   6  12  -1   30.10    2.80
  -6  12   1   29.30    3.00
   6  12  -1   29.60    3.60
   6  12  -1   29.70    4.20
   4 -12  -1  416.56   22.40
  -4 -12   1  392.16   24.20
  -4 -12   1  364.86   22.70
   4 -12  -1  434.66   23.70
  -4 -12   1  384.36   24.60
  -4 -12   1  373.96   22.30
   4 -12  -1  450.55   23.20
   4 -12  -1  409.36   22.40
  -4 -12   1  451.65   23.70
   4 -12  -1  403.06   22.20
   4  12  -1  370.56   22.30
   4  12  -1  407.86   24.00
   4  12  -1  359.76   22.30
  -4  12   1  444.96   25.40
  -4  12   1  407.66   23.00
   4  12  -1  410.86   23.40
  -4  12   1  389.66   27.80
  -4  12   1  414.06   23.30
   4  12  -1  385.56   22.50
   4  12  -1  416.06   25.00
  -4  12   1  444.46   23.70
   4  12  -1  396.86   22.40
   4  12  -1  409.46   24.10
   2 -12  -1   75.49    5.00
  -2 -12   1   88.09    6.30
  -2 -12   1   88.29    6.00
  -2 -12   1   84.19    5.40
  -2 -12   1   77.19    5.50
  -2  12   1   91.79    7.70
  -2  12   1   87.89    5.80
  -2  12   1   89.99    6.00
   2  12  -1   73.29    5.00
   2  12  -1   93.59    5.50
  -2  12   1   84.49    5.80
   2  12  -1   73.59    6.60
  -2  12   1   88.19    5.80
   2  12  -1   91.99    6.40
   2  12  -1   72.09    5.70
   2  12  -1   79.99    5.50
   0 -12   1  111.69    6.40
   0 -12  -1  113.49    6.60
   0 -12  -1  105.39    6.30
   0 -12  -1  113.79    6.50
   0 -12  -1  114.39    6.90
   0  12  -1   96.29    8.00
   0  12  -1  104.09    7.40
   0  12   1  117.09    7.20
   0  12   1  104.39    8.30
   0  12   1  119.79    7.40
   0  12   1  100.29    9.10
   0  12   1   95.29    8.50
   0  12  -1  120.29    7.10
   0  12  -1  111.19    7.60
   0  12  -1  111.09    6.70
   0  12   1  102.79    6.60
   0  12  -1  105.69    6.50
   0  12   1  119.69    6.90
   0  12   1  102.19    6.50
  -2 -12  -1  133.09    8.30
   2 -12   1  146.49    8.10
  -2 -12  -1  138.39    7.80
  -2 -12  -1  144.59    8.90
  -2 -12  -1  131.39    8.40
  -2 -12  -1  126.09    9.30
   2  12   1  135.39    9.80
  -2  12  -1  128.99    8.20
   2  12   1  134.29    9.70
   2  12   1  141.19    8.10
   2  12   1  142.49    8.40
   2  12   1  147.19    8.80
  -2  12  -1  122.59    8.30
  -2  12  -1  134.49   10.30
   2  12   1  129.99    7.80
   4 -12   1   11.70    1.10
   4 -12   1   12.90    1.40
   4 -12   1   13.00    2.20
  -4 -12  -1   13.90    1.30
   4 -12   1   11.20    1.10
   4 -12   1    9.90    1.80
  -4 -12  -1   14.40    2.00
   4 -12   1   10.20    1.30
  -4 -12  -1   13.80    1.50
  -4 -12  -1   17.80    3.40
  -4 -12  -1   10.70    1.70
  -4 -12  -1   13.50    2.20
   4  12   1   12.10    1.60
   4  12   1   10.70    1.10
   4  12   1   10.90    2.90
   4  12   1   11.90    1.80
   4  12   1   11.80    1.40
   4  12   1    9.80    1.00
   4  12   1   10.60    1.80
   6 -12   1  141.09    8.60
   6 -12   1  138.29    8.10
  -6 -12  -1  141.79   10.70
  -6 -12  -1  144.39    9.70
  -6 -12  -1  144.39    8.90
  -6 -12  -1  131.29   11.20
   6 -12   1  129.39    8.30
   6 -12   1  141.29    8.90
  -6 -12  -1  143.89    8.30
   6 -12   1  141.09    8.40
   6 -12   1  151.88    8.10
   6 -12   1  134.99    8.70
   6 -12   1  140.59    8.20
   6 -12   1  137.39    9.90
   6 -12   1  136.79    9.00
   6  12   1  138.19    8.70
   6  12   1  148.69   11.10
   6  12   1  136.39    9.60
  -6  12  -1  159.28    8.80
  -6  12  -1  157.18    9.20
  -8 -12  -1  168.38    9.80
   8 -12   1  149.19   11.20
   8 -12   1  166.68    9.80
  -8 -12  -1  169.18   11.20
   8 -12   1  161.48   10.00
  -8 -12  -1  162.48   13.50
   8 -12   1  165.68    9.40
   8 -12   1  168.08    9.60
   8 -12   1  163.38    9.60
  -8 -12  -1  176.28   10.60
   8 -12   1  164.38    9.40
   8 -12   1  171.48    9.80
  -8 -12  -1  171.48   13.50
  -8  12  -1  157.48   13.90
   8  12   1  164.88    9.60
  -8  12  -1  173.08   10.70
   8  12   1  155.38    9.70
  -8  12  -1  178.08   10.60
   8  12   1  176.28   10.30
  10 -12   1   70.09    3.80
  10 -12   1   66.39    4.10
  10 -12   1   64.39    5.00
  10 -12   1   67.09    3.80
  10 -12   1   67.39    3.90
  10 -12   1   67.89    4.00
  10  12   1   65.89    3.80
  10  12   1   63.99    3.90
  10  12   1   56.39    3.90
  10  12   1   64.09    4.50
   9 -13  -1  103.29    7.40
   9 -13  -1  103.89    6.00
  -9 -13   1  101.39    7.40
   9 -13  -1  100.19    6.60
   9 -13  -1  105.39    6.20
   9  13  -1  112.39    6.90
   9  13  -1   99.19    6.10
  -9  13   1  110.99    7.50
  -7 -13   1  140.59    8.30
   7 -13  -1  149.39    8.10
   7 -13  -1  140.49    7.90
   7 -13  -1  136.29    8.10
   7 -13  -1  122.79    8.70
  -7 -13   1  138.19   11.10
   7 -13  -1  130.59    7.90
  -7 -13   1  144.99    9.60
  -7 -13   1  142.99    9.00
   7  13  -1  127.69    8.80
  -7  13   1  145.19    9.40
  -7  13   1  141.49   11.70
   7  13  -1  137.99    9.80
  -7  13   1  141.99    9.70
   7  13  -1  129.29   10.00
  -5 -13   1  135.19    9.90
   5 -13  -1  152.88    8.30
   5 -13  -1  140.79    9.70
  -5 -13   1  128.79    8.30
   5 -13  -1  142.49    8.10
   5 -13  -1  147.19    8.50
   5 -13  -1  148.99    9.10
  -5 -13   1  136.99   10.40
   5 -13  -1  147.39    8.10
  -5 -13   1  130.99   10.80
   5 -13  -1  131.99    7.80
   5 -13  -1  145.19    8.30
   5 -13  -1  153.28    8.30
   5 -13  -1  148.39    8.10
  -5 -13   1  137.59    9.30
   5  13  -1  152.58    9.00
  -5  13   1  135.99    9.20
  -5  13   1  127.79   14.00
   5  13  -1  149.79   11.20
  -5  13   1  148.89   11.50
  -5  13   1  138.39    9.60
  -5  13   1  143.59    9.20
   5  13  -1  148.09    8.20
   5  13  -1  141.19    8.10
   5  13  -1  151.08   10.30
   5  13  -1  131.59    8.10
  -3 -13   1  274.27   19.20
  -3 -13   1  345.07   18.90
  -3 -13   1  289.37   18.00
  -3 -13   1  298.97   17.80
  -3  13   1  287.77   18.10
   3  13  -1  338.27   18.20
   3  13  -1  337.27   18.80
   3  13  -1  321.37   17.40
   3  13  -1  304.47   19.60
  -3  13   1  300.07   18.10
  -3  13   1  296.97   18.40
  -3  13   1  311.97   20.50
  -1 -13  -1  192.78   11.40
  -1 -13  -1  184.28   12.50
  -1 -13  -1  214.68   12.10
   1  13   1  217.98   12.20
  -1  13  -1  182.98   13.80
  -1  13  -1  177.58   12.60
  -1  13  -1  223.88   12.60
  -1  13  -1  181.78   11.50
   1  13   1  213.58   14.20
   1  13   1  184.88   11.20
  -1  13  -1  211.88   11.60
   1  13   1  202.68   13.40
   1  13   1  205.38   12.40
  -1  13  -1  190.18   13.50
   1  13   1  203.58   11.80
  -1  13  -1  216.78   11.90
   1  13   1  186.18   13.20
   1  13   1  174.58   11.30
  -3 -13  -1  789.62   44.70
  -3 -13  -1  846.92   46.90
  -3 -13  -1  791.82   45.30
   3  13   1  834.92   45.30
  -3  13  -1  870.91   48.00
   3  13   1  792.82   44.60
   3  13   1  850.71   45.90
  -3  13  -1  751.82   45.00
   5 -13   1   14.50    1.30
   5 -13   1   13.10    1.70
   5 -13   1   11.70    2.00
   5 -13   1   10.30    1.20
  -5 -13  -1   11.60    2.10
   5 -13   1   14.10    1.50
   5 -13   1   13.40    1.60
   5 -13   1   12.10    1.20
   5 -13   1   13.90    2.60
   5 -13   1   13.50    1.50
  -5 -13  -1   11.50    1.60
  -5 -13  -1   12.00    1.30
  -5 -13  -1   10.40    2.60
  -5 -13  -1   13.30    3.30
  -5  13  -1   15.90    5.90
  -5  13  -1   15.30    4.10
   5  13   1   11.20    1.50
  -5  13  -1   14.80    1.70
   5  13   1   11.60    1.10
  -5  13  -1   12.90    2.00
   5  13   1   13.10    2.00
   5  13   1   14.90    3.30
   5  13   1   15.80    1.30
  -7 -13  -1  241.18   17.30
   7 -13   1  237.58   14.00
   7 -13   1  235.68   13.20
   7 -13   1  226.68   13.40
   7 -13   1  234.68   13.20
   7 -13   1  235.98   13.60
   7 -13   1  213.78   15.10
  -7 -13  -1  268.27   17.00
  -7 -13  -1  259.57   13.60
   7 -13   1  234.28   13.40
   7 -13   1  238.78   13.80
  -7 -13  -1  256.07   14.30
   7  13   1  220.08   14.90
   7  13   1  212.48   13.50
   7  13   1  219.68   13.70
  -7  13  -1  256.57   14.60
  -7  13  -1  254.37   17.60
  -9 -13  -1  357.06   20.50
   9 -13   1  341.67   21.10
  -9 -13  -1  382.76   19.80
   9 -13   1  364.46   19.40
  -9 -13  -1  337.77   20.90
   9 -13   1  338.57   19.80
   9 -13   1  360.66   19.60
   9  13   1  374.56   20.30
   9  13   1  346.37   19.60
  -9  13  -1  358.46   20.70
   9  13   1  330.67   19.60
  10 -14  -1   96.29    5.30
  10 -14  -1   90.39    5.50
  10 -14  -1   92.39    5.20
  10 -14  -1   92.79    5.20
  10  14  -1   90.19    5.80
  10  14  -1   87.79    5.10
   8 -14  -1  308.67   18.20
   8 -14  -1  295.97   16.70
  -8 -14   1  302.57   18.10
   8 -14  -1  281.17   17.20
   8 -14  -1  308.67   16.50
   8 -14  -1  314.47   16.50
   8  14  -1  274.77   17.20
  -8  14   1  318.67   18.20
   8  14  -1  277.77   16.60
   6 -14  -1   32.20    3.70
   6 -14  -1   30.10    2.30
   6 -14  -1   33.50    2.70
  -6 -14   1   38.40    3.00
   6 -14  -1   33.80    2.50
   6 -14  -1   28.80    2.60
  -6 -14   1   37.90    2.70
  -6 -14   1   41.40    4.80
   6 -14  -1   31.60    2.30
   6  14  -1   29.90    4.50
   6  14  -1   32.70    2.30
   6  14  -1   31.20    3.90
  -6  14   1   40.20    3.80
  -6  14   1   41.90    4.10
  -6  14   1   37.90    8.70
   6  14  -1   34.20    3.10
  -6  14   1   39.10    4.20
  -6  14   1   42.00    5.90
  -4 -14   1  386.16   21.20
   4 -14  -1  355.56   20.90
  -4 -14   1  368.06   21.50
   4 -14  -1  327.87   21.40
   4 -14  -1  373.86   20.30
  -4 -14   1  364.86   20.40
  -4 -14   1  400.36   22.50
   4 -14  -1  319.67   20.10
   4 -14  -1  341.37   20.00
   4 -14  -1  367.56   20.00
   4  14  -1  394.76   23.40
  -4  14   1  370.36   21.40
   4  14  -1  357.16   20.20
   4  14  -1  358.46   20.40
   4  14  -1  367.86   22.30
   4  14  -1  351.16   20.30
  -4  14   1  367.26   21.30
   4  14  -1  373.36   22.20
  -4  14   1  354.76   21.30
  -4  14   1  369.96   21.70
  -4  14   1  380.76   24.60
   4  14  -1  372.06   21.40
  -2 -14   1  126.99    8.50
   2 -14  -1  131.79    7.60
   2 -14  -1  138.09    7.80
  -2 -14   1  127.69    8.10
  -2 -14   1  125.39    7.90
  -2  14   1  109.29    8.10
  -2  14   1  107.69   11.10
  -2  14   1  129.99    8.10
   2  14  -1  122.79    9.00
  -2  14   1  117.49    8.20
   2  14  -1  132.09    7.70
   2  14  -1  131.39    8.70
  -2  14   1  124.79   10.70
   2  14  -1  128.29    9.70
   2  14  -1  138.59    8.10
   2  14  -1  124.39    7.50
  -2  14   1  138.59    8.60
   2  14  -1  133.59    8.30
   0 -14   1  605.24   33.90
   0  14   1  574.04   37.20
   0  14  -1  573.64   36.20
   0  14  -1  620.64   34.00
   0  14   1  625.04   34.00
   0  14   1  642.64   36.80
   0  14   1  594.94   36.50
   0  14   1  697.53   34.60
  -2 -14  -1  775.72   46.20
   2 -14   1  837.82   44.40
   2  14   1  868.11   44.90
  -2  14  -1  809.82   44.40
  -2  14  -1  690.23   44.50
  -2  14  -1  864.51   47.50
   4 -14   1  388.56   22.40
  -4 -14  -1  435.26   23.90
   4 -14   1  421.66   23.00
   4 -14   1  403.16   24.30
   4 -14   1  455.75   22.90
  -4 -14  -1  437.96   24.80
  -4 -14  -1  401.56   25.60
   4 -14   1  408.36   22.40
   4 -14   1  399.36   22.60
  -4 -14  -1  371.56   22.80
   4 -14   1  434.56   23.20
  -4 -14  -1  373.16   23.80
  -4 -14  -1  388.96   23.00
  -4 -14  -1  389.86   22.60
   4 -14   1  412.46   22.50
   4  14   1  390.66   22.50
   4  14   1  425.36   25.70
   4  14   1  423.56   24.40
   4  14   1  383.96   24.30
  -4  14  -1  372.26   23.30
   4  14   1  435.76   26.00
   4  14   1  414.16   22.60
  -4  14  -1  448.96   26.90
   4  14   1  451.65   23.30
  -4  14  -1  400.66   23.50
  -4  14  -1  389.06   23.30
  -6 -14  -1  562.34   31.50
   6 -14   1  567.64   30.20
   6 -14   1  540.95   29.90
   6 -14   1  568.94   30.60
  -6 -14  -1  549.15   30.70
  -6 -14  -1  548.95   32.90
   6 -14   1  525.95   31.80
   6 -14   1  559.04   30.30
  -6 -14  -1  583.44   30.00
  -6  14  -1  565.14   31.00
   6  14   1  507.25   31.60
  -6  14  -1  503.05   34.00
   6  14   1  496.45   30.10
  -6  14  -1  526.35   30.70
   6  14   1  543.15   33.40
   6  14   1  549.65   30.50
  -6  14  -1  535.95   31.00
   8 -14   1   31.10    2.30
   8 -14   1   29.60    2.40
  -8 -14  -1   32.20    3.50
  -8 -14  -1   33.70    2.50
   8 -14   1   28.60    2.10
   8 -14   1   30.30    2.10
   8 -14   1   32.20    2.40
  -8 -14  -1   33.90    3.00
   8 -14   1   24.60    3.50
   8 -14   1   30.00    2.70
   8  14   1   31.30    2.40
   8  14   1   28.00    2.30
   8  14   1   31.70    2.80
  -8  14  -1   34.40    3.30
  10 -14   1  135.29    8.00
  10 -14   1  152.28    7.90
  10 -14   1  149.59    7.80
  10 -14   1  139.49    7.70
  10 -14   1  146.79    8.90
  10  14   1  133.79    7.70
  10  14   1  138.79    8.40
  10  14   1  126.19    7.90
   9 -15  -1    1.80    0.60
   9 -15  -1    2.00    1.00
   9 -15  -1    1.60    0.50
   9 -15  -1    2.30    0.50
   9 -15  -1    1.30    0.80
  -9  15   1   -0.20    1.50
   9  15  -1    1.50    0.90
  -9  15   1    2.10    1.30
   9  15  -1    2.00    0.50
  -9  15   1    5.30    1.80
   7 -15  -1    8.40    1.30
   7 -15  -1   10.40    1.90
  -7 -15   1   13.80    3.50
  -7 -15   1    8.10    1.50
   7 -15  -1   10.50    1.50
  -7 -15   1   11.30    2.40
   7 -15  -1    8.40    1.10
   7 -15  -1   10.60    2.30
   7 -15  -1   10.60    1.20
  -7 -15   1    9.40    1.60
   7  15  -1   10.70    2.60
  -7  15   1    7.90    4.10
   7  15  -1    9.60    2.10
  -7  15   1   11.40    5.40
  -7  15   1    8.00    2.50
  -7  15   1   11.60    2.30
   7  15  -1   10.10    1.80
  -7  15   1    6.90    2.00
  -7  15   1   11.20    2.40
  -5 -15   1   25.10    3.60
  -5 -15   1   24.10    3.20
  -5 -15   1   23.90    2.20
  -5 -15   1   24.70    2.90
   5 -15  -1   25.80    2.20
   5 -15  -1   26.40    1.90
   5 -15  -1   28.50    3.30
   5 -15  -1   24.60    2.80
   5 -15  -1   24.50    2.10
   5 -15  -1   23.30    1.50
   5 -15  -1   22.80    1.90
   5 -15  -1   24.10    1.60
  -5  15   1   26.50    3.00
   5  15  -1   30.20    2.70
   5  15  -1   24.10    2.00
  -5  15   1   34.10    7.00
   5  15  -1   23.40    3.90
   5  15  -1   24.10    1.90
  -5  15   1   14.00    6.30
   5  15  -1   27.60    3.50
  -5  15   1   23.90    3.10
   5  15  -1   22.20    1.80
  -5  15   1   18.70    3.20
  -5  15   1   27.80    3.30
  -3 -15   1   63.89    4.70
   3 -15  -1   58.29    3.80
   3 -15  -1   66.59    3.90
  -3 -15   1   65.69    4.90
   3 -15  -1   63.69    4.10
   3 -15  -1   60.49    3.70
   3 -15  -1   64.59    4.10
  -3 -15   1   67.99    4.20
  -3 -15   1   62.89    5.40
   3  15  -1   66.19    5.00
  -3  15   1   60.99    5.00
   3  15  -1   57.59    5.30
   3  15  -1   66.19    4.30
   3  15  -1   68.59    4.70
   3  15  -1   59.09    4.10
  -3  15   1   63.49    5.10
  -3  15   1   67.59    5.10
  -3  15   1   69.29    5.40
  -3  15   1   51.89    8.10
   3  15  -1   61.89    4.10
  -3  15   1   65.39    7.40
   3  15  -1   66.79    5.80
   3  15  -1   67.89    6.50
  -1 -15   1   43.00    2.80
  -1 -15   1   39.70    3.30
   1 -15  -1   39.50    2.60
   1 -15  -1   42.10    3.10
  -1 -15   1   38.50    3.00
  -1  15   1   42.00    3.40
  -1  15   1   43.70    3.40
  -1  15   1   46.70    4.20
  -1  15   1   35.80    5.80
   1  15  -1   38.50    4.70
  -1  15   1   44.20    3.50
   1  15  -1   47.00    3.10
   1  15  -1   44.50    3.50
   1  15  -1   46.00    3.10
  -1  15   1   38.30    5.70
  -1  15   1   39.50    5.10
   1  15  -1   43.30    3.40
   1  15  -1   45.20    4.30
   1  15  -1   44.70    3.90
  -1 -15  -1   24.20    2.60
   1 -15   1   23.20    2.00
   1 -15   1   29.80    1.90
   1 -15   1   26.30    2.00
  -1 -15  -1   22.60    2.10
   1 -15   1   28.40    1.90
   1 -15   1   28.70    2.20
  -1  15  -1   26.50    2.50
  -1  15  -1   27.10    3.20
  -1  15  -1   26.50    2.40
   1  15   1   28.90    2.30
  -1  15  -1   32.70    4.40
   1  15   1   28.20    2.40
  -1  15  -1   23.40    2.30
   1  15   1   34.10    4.80
  -1  15  -1   26.90    2.70
   1  15   1   24.50    4.10
   1  15   1   27.70    3.10
   1  15   1   30.80    2.30
  -1  15  -1   29.00    4.50
   1  15   1   26.90    2.90
   1  15   1   26.40    2.50
   3 -15   1   96.19    6.20
   3 -15   1  104.59    6.30
   3 -15   1  103.19    5.90
   3 -15   1  107.19    6.60
   3 -15   1  100.89    5.90
  -3 -15  -1  114.19    7.00
  -3 -15  -1  105.49    6.00
   3 -15   1  101.59    5.70
   3 -15   1   98.69    5.90
   3 -15   1  110.79    7.70
  -3 -15  -1   99.09    6.20
   3 -15   1  113.79    5.90
   3 -15   1   97.39    6.10
  -3 -15  -1   93.99    6.90
   3  15   1  107.49    6.70
   3  15   1  111.69    7.80
  -3  15  -1   95.09    6.60
   3  15   1  106.99    7.10
   3  15   1  102.49    7.50
   3  15   1  101.79    6.10
  -3  15  -1   94.39    9.20
   3  15   1   90.09    6.10
   3  15   1  102.09    6.10
   3  15   1  103.49    8.70
  -3  15  -1   91.79    6.70
   3  15   1  100.89    6.20
  -3  15  -1  115.49    6.90
  -5 -15  -1    4.70    1.20
  -5 -15  -1    4.80    1.60
   5 -15   1    5.50    0.80
   5 -15   1    5.10    1.40
  -5 -15  -1    4.50    2.50
  -5 -15  -1    4.40    0.90
   5 -15   1    4.40    1.10
   5 -15   1    7.40    2.20
   5 -15   1    5.10    1.00
  -5 -15  -1    8.40    2.70
   5 -15   1    4.80    0.80
   5 -15   1    6.80    2.00
  -5 -15  -1    6.20    1.20
  -5  15  -1   10.90    4.40
  -5  15  -1    5.00    1.50
   5  15   1    7.30    1.30
   5  15   1    6.30    1.80
  -5  15  -1    6.20    3.70
   5  15   1    5.10    0.80
  -5  15  -1    6.40    1.60
   5  15   1    5.20    0.90
   5  15   1    6.20    2.60
  -7 -15  -1   88.59    6.90
   7 -15   1   87.79    6.00
   7 -15   1   98.79    5.40
   7 -15   1   92.49    5.50
  -7 -15  -1   89.69    6.20
   7 -15   1   89.39    7.20
  -7 -15  -1   91.79    5.60
   7 -15   1   98.89    5.40
   7 -15   1   92.59    5.80
   7 -15   1   95.39    5.60
  -7 -15  -1   82.89    7.90
  -7  15  -1   80.59    6.10
  -7  15  -1   71.69    9.70
   7  15   1   84.29    5.90
  -7  15  -1   85.19    6.30
   7  15   1   91.09    5.70
  -7  15  -1   94.09    6.70
   9 -15   1    6.90    1.60
   9 -15   1    5.80    1.00
   9 -15   1    5.50    1.10
   9 -15   1    6.30    0.80
   9 -15   1    6.50    0.80
   9  15   1    6.90    1.30
   9  15   1    7.60    0.90
   8 -16  -1  156.18    9.50
   8 -16  -1  141.59    8.00
   8 -16  -1  149.99    8.20
   8 -16  -1  138.19    8.00
  -8 -16   1  143.89    8.60
  -8 -16   1  132.89    9.30
   8 -16  -1  129.79    8.60
   8  16  -1  139.99    9.60
   8  16  -1  133.79    8.10
  -8  16   1  137.09    9.50
  -8  16   1  148.79    9.40
  -6 -16   1  198.98   13.80
  -6 -16   1  204.78   11.40
   6 -16  -1  180.08   12.40
   6 -16  -1  196.58   11.20
   6 -16  -1  175.78   11.60
   6 -16  -1  186.18   10.80
   6 -16  -1  177.08   10.90
  -6 -16   1  214.18   12.40
   6 -16  -1  183.78   10.80
   6  16  -1  193.38   10.80
  -6  16   1  203.28   12.80
   6  16  -1  185.28   14.30
  -6  16   1  178.18   12.30
  -6  16   1  218.48   12.80
   6  16  -1  188.78   13.40
  -6  16   1  167.58   15.30
  -6  16   1  197.68   12.40
   6  16  -1  192.38   11.90
  -4 -16   1  158.18    9.70
   4 -16  -1  141.09    8.00
   4 -16  -1  133.59    8.20
   4 -16  -1  138.09    7.80
  -4 -16   1  138.59    8.40
   4 -16  -1  136.29    8.00
   4 -16  -1  156.48    8.40
   4 -16  -1  140.69    8.20
  -4 -16   1  141.19    9.10
   4 -16  -1  151.88    8.20
  -4 -16   1  132.19   10.00
   4 -16  -1  143.09    8.90
   4  16  -1  134.09    9.50
  -4  16   1  140.79   12.60
  -4  16   1  132.29    9.30
   4  16  -1  144.39    8.30
  -4  16   1  125.59    9.30
   4  16  -1  136.09    8.20
  -4  16   1  121.89    9.20
   4  16  -1  139.79   10.30
   4  16  -1  143.49    8.50
   4  16  -1  140.39   10.20
  -4  16   1  149.49    9.80
   4  16  -1  143.19   11.20
   2 -16  -1  293.67   16.90
   2 -16  -1  281.07   17.00
  -2 -16   1  294.07   17.50
   2 -16  -1  321.67   17.10
  -2 -16   1  292.37   17.90
  -2 -16   1  332.57   18.00
   2 -16  -1  271.17   16.80
   2 -16  -1  292.47   17.50
   2  16  -1  305.37   17.20
   2  16  -1  289.07   17.10
  -2  16   1  280.17   17.80
  -2  16   1  292.37   21.20
   2  16  -1  322.77   19.40
   2  16  -1  330.17   18.00
  -2  16   1  305.97   21.00
   2  16  -1  331.37   18.20
   2  16  -1  310.67   20.10
   2  16  -1  323.27   17.40
   2  16  -1  285.87   17.10
   2  16  -1  332.37   18.90
  -2  16   1  321.07   18.10
  -2  16   1  333.47   17.70
   0 -16   1  306.97   17.60
   0 -16   1  323.87   17.70
   0 -16   1  316.27   17.80
   0 -16  -1  299.37   17.90
   0 -16   1  282.47   17.70
   0 -16  -1  287.87   17.70
   0 -16   1  321.07   18.30
   0  16   1  317.97   18.20
   0  16   1  350.76   22.10
   0  16  -1  316.57   18.00
   0  16  -1  331.37   18.50
   0  16   1  322.77   19.60
   0  16  -1  321.17   18.10
   0  16   1  330.47   19.10
   0  16   1  331.27   18.60
   0  16   1  336.67   21.10
   0  16  -1  326.77   19.00
   0  16   1  313.97   20.60
   0  16   1  293.07   18.10
   0  16   1  324.87   18.00
   0  16  -1  341.07   20.90
   0  16  -1  354.66   20.00
   0  16  -1  328.57   18.50
   2 -16   1  676.13   39.10
  -2 -16  -1  718.33   39.40
  -2 -16  -1  703.13   40.30
   2  16   1  717.63   40.60
   2  16   1  774.32   40.10
   2  16   1  782.62   41.00
  -2  16  -1  725.13   39.50
  -2  16  -1  635.24   42.70
  -2  16  -1  723.73   39.30
  -2  16  -1  721.93   39.50
  -2  16  -1  770.42   41.00
   2  16   1  660.63   38.90
   2  16   1  666.43   42.00
   2  16   1  680.63   39.00
  -4 -16  -1  310.37   19.70
   4 -16   1  323.27   17.90
  -4 -16  -1  290.67   17.70
   4 -16   1  354.86   18.10
   4 -16   1  302.47   17.70
  -4 -16  -1  312.37   19.00
  -4 -16  -1  293.57   17.40
   4 -16   1  299.37   17.30
  -4 -16  -1  318.17   18.60
   4  16   1  341.17   18.30
   4  16   1  326.37   17.50
  -4  16  -1  289.07   18.10
  -4  16  -1  298.07   18.20
   4  16   1  311.87   17.50
   4  16   1  343.07   21.10
   4  16   1  338.87   19.60
  -4  16  -1  278.87   18.30
  -4  16  -1  325.47   22.10
  -6 -16  -1   89.89    6.50
   6 -16   1   82.39    6.80
   6 -16   1   77.39    4.90
   6 -16   1   91.79    5.50
   6 -16   1   89.29    5.00
  -6 -16  -1   88.69    5.20
   6 -16   1   85.39    5.20
  -6 -16  -1   77.19    7.30
  -6 -16  -1   83.89    5.50
  -6  16  -1   89.79    6.30
   6  16   1   88.09    8.10
   6  16   1   83.89    5.70
   6  16   1   77.39    6.70
   6  16   1   82.29    4.80
   6  16   1   72.59    5.20
  -6  16  -1   83.79    6.10
  -6  16  -1   65.69    8.50
  -6  16  -1   75.39    6.00
  -6  16  -1   78.99    5.70
  -8 -16  -1   87.19    6.50
   8 -16   1   91.49    5.30
   8 -16   1   91.69    5.20
   8 -16   1   81.89    5.70
   8 -16   1   88.89    5.50
   8 -16   1   91.99    5.50
   8 -16   1   91.99    6.80
   8  16   1   94.29    5.50
   8  16   1   97.69    6.00
   8  16   1   89.59    5.50
  -8  16  -1   85.49    6.30
   9 -17  -1   25.00    1.70
   9 -17  -1   22.00    1.90
   9 -17  -1   23.70    1.50
  -9  17   1   18.50    2.50
   9  17  -1   21.10    2.00
  -7 -17   1   57.69    4.20
   7 -17  -1   65.59    4.00
  -7 -17   1   59.69    5.00
   7 -17  -1   58.79    3.90
   7 -17  -1   57.79    4.40
   7 -17  -1   63.09    3.70
  -7  17   1   63.39    5.20
  -7  17   1   53.99    5.20
  -7  17   1   57.09    8.40
   7  17  -1   52.99    4.40
  -7  17   1   68.99    5.30
  -5 -17   1   83.29    7.20
   5 -17  -1   79.89    5.40
  -5 -17   1   85.29    5.50
   5 -17  -1   90.69    5.10
   5 -17  -1   85.99    5.90
  -5 -17   1   89.29    6.40
   5 -17  -1   83.59    5.30
   5 -17  -1   92.29    5.10
  -5  17   1   93.79    6.60
  -5  17   1   85.39    6.70
  -5  17   1   83.79    9.60
  -5  17   1   80.69    6.30
   5  17  -1   72.89    7.00
   5  17  -1   86.39    5.10
   5  17  -1   88.59    6.10
  -5  17   1   79.09    6.40
   5  17  -1   78.79    5.10
  -5  17   1   85.99    6.60
   5  17  -1   76.19    7.90
   5  17  -1   84.59    5.20
   3 -17  -1   54.89    3.70
   3 -17  -1   53.39    3.30
   3 -17  -1   53.79    3.40
  -3 -17   1   58.19    4.60
   3 -17  -1   50.59    4.10
  -3 -17   1   58.59    3.70
  -3 -17   1   58.39    4.30
   3 -17  -1   56.89    3.70
   3 -17  -1   48.40    3.60
  -3 -17   1   53.39    4.70
   3 -17  -1   52.19    3.40
   3  17  -1   56.89    5.50
  -3  17   1   56.49    4.60
   3  17  -1   55.19    3.70
  -3  17   1   57.09    7.20
  -3  17   1   57.09    4.70
  -3  17   1   52.59    7.80
   3  17  -1   57.39    3.90
  -3  17   1   42.50    7.70
  -3  17   1   61.69    4.70
   3  17  -1   58.69    4.80
   3  17  -1   52.19    5.20
  -3  17   1   57.29    4.90
  -3  17   1   61.69    4.70
   3  17  -1   56.59    6.10
   3  17  -1   57.69    4.40
   3  17  -1   48.30    3.80
   1 -17  -1  177.78   10.00
   1 -17  -1  180.08   10.10
  -1 -17   1  164.18   10.00
   1 -17  -1  174.98   10.20
   1 -17  -1  171.88   10.60
  -1 -17   1  187.98   11.00
  -1 -17   1  160.98   10.60
  -1 -17   1  178.28   10.20
   1 -17  -1  179.28   10.10
   1  17  -1  189.88   11.30
  -1  17   1  187.68   10.70
  -1  17   1  177.08   11.10
   1  17  -1  170.38   10.40
  -1  17   1  156.18   10.40
  -1  17   1  180.98   10.80
   1  17  -1  161.68   10.30
   1  17  -1  196.98   12.60
   1  17  -1  174.98   13.00
  -1  17   1  198.48   12.30
  -1  17   1  175.18   13.50
   1  17  -1  181.78   10.50
  -1  17   1  187.48   10.80
   1  17  -1  184.78   11.80
  -1  17   1  188.68   13.80
  -1  17   1  172.68   14.40
   1  17  -1  179.58   10.50
  -1  17   1  190.48   11.60
   1  17  -1  191.78   11.10
  -1 -17  -1  167.38    9.60
   1 -17   1  177.58   10.00
   1 -17   1  153.38    9.60
   1 -17   1  168.68    9.50
  -1 -17  -1  150.48    9.40
   1 -17   1  162.68    9.50
  -1 -17  -1  158.58   10.40
   1 -17   1  163.18    9.70
   1 -17   1  165.58    9.50
  -1 -17  -1  180.78   10.50
   1  17   1  166.28    9.90
  -1  17  -1  170.38   10.80
   1  17   1  175.28    9.90
   1  17   1  163.28    9.80
   1  17   1  155.48   12.40
  -1  17  -1  170.28   10.00
  -1  17  -1  181.08   11.80
   1  17   1  175.58   12.30
   1  17   1  171.78   10.60
  -1  17  -1  187.28   13.00
   1  17   1  168.28   11.10
   1  17   1  147.99    9.70
   1  17   1  167.68   10.30
  -1  17  -1  185.18   10.50
  -1  17  -1  183.08   13.70
  -1  17  -1  176.48   10.00
   3 -17   1  353.86   19.90
  -3 -17  -1  344.87   19.70
   3 -17   1  349.17   19.80
  -3 -17  -1  362.46   21.50
   3 -17   1  358.66   19.20
   3 -17   1  353.46   19.70
  -3 -17  -1  366.46   20.40
   3 -17   1  343.37   19.40
   3  17   1  394.16   23.40
  -3  17  -1  354.56   21.70
  -3  17  -1  381.26   20.20
  -3  17  -1  346.27   20.20
  -3  17  -1  339.57   23.60
  -3  17  -1  327.87   20.50
   3  17   1  341.47   20.70
   3  17   1  363.76   21.70
  -3  17  -1  351.96   20.30
   3  17   1  361.16   20.30
   3  17   1  342.27   19.50
   3  17   1  328.67   21.40
   3  17   1  324.27   19.60
   3  17   1  355.56   19.80
   5 -17   1   92.19    5.30
   5 -17   1   90.89    5.30
   5 -17   1   92.99    5.90
   5 -17   1   89.69    6.00
  -5 -17  -1   88.19    5.70
   5 -17   1   91.49    5.60
  -5 -17  -1   84.49    7.50
  -5 -17  -1   92.59    6.60
   5 -17   1   87.99    5.50
  -5  17  -1   84.89    5.90
   5  17   1   90.29    6.10
   5  17   1   92.99    5.30
  -5  17  -1   95.19    6.40
   5  17   1   80.99    8.10
  -5  17  -1   84.69    6.40
   5  17   1   81.59    7.00
  -5  17  -1   78.59    9.20
   7 -17   1  208.18   11.90
   7 -17   1  224.18   11.70
   7 -17   1  203.98   12.20
   7 -17   1  220.58   12.10
  -7 -17  -1  205.28   13.10
  -7 -17  -1  217.98   12.30
   7 -17   1  217.08   11.70
  -7  17  -1  194.38   12.50
  -7  17  -1  185.58   12.60
   7  17   1  201.88   11.90
   9 -17   1   22.30    1.60
   9 -17   1   22.40    1.40
   9 -17   1   19.40    1.70
   9 -17   1   23.00    1.40
   9  17   1   19.10    1.90
   9  17   1   17.90    1.50
   8 -18  -1    5.70    1.20
   8 -18  -1    6.00    0.80
   8 -18  -1    6.70    0.80
   8 -18  -1    5.40    1.00
  -8 -18   1    6.10    1.10
   8  18  -1    6.10    0.90
  -8  18   1    4.50    1.50
  -8  18   1    5.30    1.50
  -8  18   1    4.90    1.50
   6 -18  -1  125.89    7.30
   6 -18  -1  120.19    6.90
   6 -18  -1  114.99    7.00
  -6 -18   1  121.49    8.20
   6 -18  -1  116.89    7.60
   6 -18  -1  126.99    6.90
  -6 -18   1  121.69    7.40
  -6  18   1  107.79    8.00
   6  18  -1  125.69    7.90
  -6  18   1  105.29    8.30
  -6  18   1  115.09    8.00
   6  18  -1  127.19    6.80
  -6  18   1  116.49    8.20
  -6  18   1  104.39    7.80
   4 -18  -1   71.99    4.80
  -4 -18   1   80.79    5.70
   4 -18  -1   73.89    4.60
   4 -18  -1   71.99    4.50
   4 -18  -1   77.69    4.60
  -4 -18   1   78.19    5.00
  -4 -18   1   81.59    6.20
   4 -18  -1   72.69    4.70
   4 -18  -1   75.19    4.90
   4 -18  -1   81.79    5.40
  -4 -18   1   82.09    6.40
   4 -18  -1   72.79    4.30
   4  18  -1   82.59    5.70
   4  18  -1   77.59    6.90
   4  18  -1   68.69    6.00
  -4  18   1   75.19    5.80
   4  18  -1   75.69    4.80
   4  18  -1   76.69    5.00
   4  18  -1   75.59    4.80
  -4  18   1   68.79    5.80
   4  18  -1   75.49    6.80
  -4  18   1   70.89    8.80
  -4  18   1   68.09    9.20
   4  18  -1   78.09    4.90
  -4  18   1   73.79    5.80
   4  18  -1   78.79    7.70
  -4  18   1   82.99    5.80
   2 -18  -1  118.29    7.60
   2 -18  -1  126.19    7.60
  -2 -18   1  146.29    7.80
   2 -18  -1  124.49    7.80
   2 -18  -1  119.79    8.10
  -2 -18   1  129.79    8.30
   2 -18  -1  129.99    7.60
  -2 -18   1  142.39    7.90
   2 -18  -1  120.39    7.70
   2 -18  -1  133.99    8.20
   2  18  -1  148.49    8.90
  -2  18   1  150.38   10.10
   2  18  -1  124.99    7.90
  -2  18   1  153.18    8.70
  -2  18   1  152.98    8.50
  -2  18   1  143.99    8.90
  -2  18   1  134.19   11.50
   2  18  -1  134.99   10.90
   2  18  -1  141.19   10.20
   2  18  -1  126.99    9.50
   2  18  -1  131.89    8.20
  -2  18   1  114.89   12.20
  -2  18   1  143.19   12.10
   2  18  -1  132.59    8.00
  -2  18   1  148.59    9.40
   2  18  -1  130.09    8.90
  -2  18   1  130.29    8.30
   2  18  -1  120.59    7.90
   0 -18  -1  101.89    7.10
   0 -18   1  114.19    6.60
   0 -18   1   99.99    6.30
   0 -18   1  113.09    7.00
   0 -18  -1  106.29    6.40
   0 -18   1  109.79    6.40
   0  18   1  115.89    6.80
   0  18   1  117.89    8.10
   0  18  -1   98.29    6.60
   0  18  -1  107.39    6.80
   0  18   1  124.99   10.00
   0  18  -1  105.89    8.50
   0  18  -1  111.89    6.80
   0  18   1  105.49    8.30
   0  18   1  104.59    8.90
   0  18  -1  114.19    7.30
   0  18  -1  106.29    7.30
   0  18  -1   95.99    9.00
   0  18   1  116.99    7.50
   0  18   1  110.79    6.80
   0  18   1  118.09    6.90
   0  18   1  117.19    7.30
   0  18   1   97.39    6.60
   0  18  -1   98.39    7.70
  -2 -18  -1   17.70    2.50
   2 -18   1   18.90    1.60
   2 -18   1   20.70    2.10
   2 -18   1   20.30    1.90
   2 -18   1   20.60    1.50
   2 -18   1   20.80    1.60
   2 -18   1   20.00    1.80
   2 -18   1   22.90    1.80
  -2  18  -1   19.10    5.60
   2  18   1   20.90    1.90
  -2  18  -1   24.00    2.40
  -2  18  -1   16.00    2.10
   2  18   1   26.00    3.10
   2  18   1   23.40    3.90
   2  18   1   25.40    2.40
  -2  18  -1   25.50    2.60
   2  18   1   22.00    3.10
   2  18   1   21.50    2.00
  -2  18  -1   17.40    2.40
   2  18   1   23.80    2.60
   2  18   1   18.10    2.00
  -2  18  -1   17.40    3.10
   4 -18   1   36.10    2.50
  -4 -18  -1   39.00    2.90
   4 -18   1   39.10    2.80
   4 -18   1   34.90    2.50
   4 -18   1   37.60    3.00
  -4 -18  -1   37.20    4.20
   4 -18   1   35.80    3.10
  -4 -18  -1   31.20    3.30
   4 -18   1   38.60    2.80
   4  18   1   37.30    4.10
   4  18   1   37.80    2.60
  -4  18  -1   26.20    6.00
  -4  18  -1   37.50    3.40
   4  18   1   43.00    3.40
  -4  18  -1   37.80    3.50
   4  18   1   46.70    5.50
  -4  18  -1   34.50    3.10
  -4  18  -1   32.60    4.20
   4  18   1   37.80    2.60
   6 -18   1   47.80    3.60
   6 -18   1   49.80    3.10
   6 -18   1   51.79    3.50
  -6 -18  -1   46.40    4.20
   6 -18   1   47.30    3.30
   6 -18   1   46.70    3.00
  -6 -18  -1   45.50    3.40
  -6  18  -1   43.90    3.90
   6  18   1   44.60    3.20
   6  18   1   48.10    3.70
  -6  18  -1   47.00    4.10
   8 -18   1   23.30    2.00
   8 -18   1   23.80    1.80
   8 -18   1   24.60    1.80
   8 -18   1   25.00    1.70
   8 -18   1   23.10    1.60
  -8  18  -1   18.70    2.40
   8  18   1   25.00    1.90
   8  18   1   26.50    2.20
   7 -19  -1  123.49    6.80
   7 -19  -1  130.59    6.80
   7 -19  -1  123.19    7.00
   7 -19  -1  123.79    7.00
  -7 -19   1  125.59    7.30
   7 -19  -1  112.29    7.30
  -7  19   1  105.89    7.70
  -7  19   1  109.79    7.60
  -7  19   1  109.29    7.60
  -5 -19   1   96.69    5.70
  -5 -19   1   96.59    5.40
  -5 -19   1   89.39    7.20
   5 -19  -1   85.29    5.30
   5 -19  -1   79.19    5.20
   5 -19  -1   89.99    5.50
  -5 -19   1   89.49    6.40
   5 -19  -1   92.89    6.00
   5  19  -1   75.79    8.10
  -5  19   1   98.79    6.60
  -5  19   1  101.49    6.50
   5  19  -1   87.59    6.30
   5  19  -1   89.39    5.40
  -5  19   1   85.09    6.20
  -5  19   1   89.89    6.50
   5  19  -1   74.99    7.30
   5  19  -1   86.29    5.30
   3 -19  -1  309.67   17.10
   3 -19  -1  315.57   17.10
   3 -19  -1  296.97   17.30
  -3 -19   1  329.67   17.40
   3 -19  -1  316.47   17.70
   3 -19  -1  319.77   17.50
  -3 -19   1  281.17   17.90
   3 -19  -1  285.87   17.40
   3  19  -1  298.27   19.60
   3  19  -1  298.77   17.40
  -3  19   1  317.47   22.10
  -3  19   1  316.37   19.80
  -3  19   1  304.27   18.80
  -3  19   1  289.97   18.00
   3  19  -1  330.17   21.20
  -3  19   1  293.87   17.70
  -3  19   1  300.17   21.50
   3  19  -1  322.47   17.40
   3  19  -1  326.57   18.40
   3  19  -1  312.17   18.90
  -3  19   1  299.17   18.30
   3  19  -1  322.67   17.70
   3  19  -1  322.87   20.10
  -1 -19   1   78.89    4.50
   1 -19  -1   67.39    4.90
   1 -19  -1   66.79    4.30
   1 -19  -1   65.99    4.40
  -1 -19   1   78.89    5.20
   1 -19  -1   63.99    4.20
  -1 -19   1   70.59    4.30
  -1 -19   1   73.99    4.50
   1 -19  -1   63.79    4.40
  -1  19   1   68.79    5.30
   1  19  -1   61.39    4.50
  -1  19   1   69.89    6.30
   1  19  -1   66.39    4.60
  -1  19   1   77.59    5.00
  -1  19   1   70.99    8.30
   1  19  -1   66.69    5.40
  -1  19   1   68.99    4.80
  -1  19   1   75.29    5.90
   1  19  -1   71.59    4.70
   1  19  -1   74.79    6.60
   1  19  -1   64.09    5.80
  -1  19   1   66.79    7.50
   1  19  -1   72.49    5.30
   1  19  -1   66.99    7.10
  -1  19   1   69.99    7.10
  -1  19   1   79.59    5.10
  -1  19   1   78.19    4.90
  -1 -19  -1  466.95   25.90
  -1 -19  -1  417.26   24.70
   1 -19   1  422.26   25.30
  -1  19  -1  494.55   25.30
  -1  19  -1  482.05   25.90
   1  19   1  438.16   26.80
  -1  19  -1  455.65   28.70
  -1  19  -1  485.25   26.00
  -1  19  -1  451.05   25.10
  -1  19  -1  451.75   26.40
   1  19   1  436.26   25.10
   1  19   1  466.05   25.80
  -1  19  -1  474.55   25.20
  -1  19  -1  472.35   27.60
  -1  19  -1  476.75   25.40
   1  19   1  432.56   26.10
   1  19   1  400.46   28.20
   1  19   1  449.36   27.40
   1  19   1  421.96   25.00
   1  19   1  429.46   25.10
   3 -19   1  998.20   54.39
  -3 -19  -1  898.61   55.19
  -3 -19  -1 1057.29   55.79
  -3 -19  -1  966.70   55.89
  -3  19  -1 1008.80   54.89
   3  19   1  890.71   56.29
  -3  19  -1 1058.49   54.59
  -3  19  -1  950.60   55.09
  -3  19  -1 1045.80   58.69
   3  19   1  990.70   54.39
   3  19   1 1007.00   56.59
  -3  19  -1 1031.90   56.99
   3  19   1 1041.30   58.29
  -3  19  -1  954.60   55.39
   3  19   1  994.70   58.19
   5 -19   1  143.49    8.40
   5 -19   1  140.69    8.40
   5 -19   1  134.89    8.20
  -5 -19  -1  130.29    8.20
   5 -19   1  149.29    8.10
   5 -19   1  142.49    7.90
   5 -19   1  150.58    7.90
  -5  19  -1  118.99    8.80
   5  19   1  146.59    7.90
   5  19   1  137.69    8.70
  -5  19  -1  118.79   10.00
  -5  19  -1  140.79    8.70
   5  19   1  136.89   11.30
   5  19   1  137.29   11.30
  -5  19  -1  122.19    8.50
  -5  19  -1  133.39    8.70
   7 -19   1  212.88   11.80
   7 -19   1  221.68   11.70
   7 -19   1  211.28   11.70
  -7 -19  -1  202.48   12.10
   7 -19   1  205.78   12.10
   7 -19   1  216.18   12.00
   7  19   1  206.68   11.70
   7  19   1  219.68   12.20
   7  19   1  201.78   11.80
  -7  19  -1  198.08   12.20
   7  19   1  203.68   13.30
   8 -20  -1   15.30    1.10
   8 -20  -1   13.90    1.50
   8 -20  -1   14.20    1.10
  -8 -20   1   14.20    1.30
   8 -20  -1   15.20    1.20
   8  20  -1   15.30    1.50
  -8  20   1   13.80    1.70
   8  20  -1   13.10    1.10
  -8  20   1   12.50    1.70
  -6 -20   1  115.19    6.80
  -6 -20   1  116.59    6.60
   6 -20  -1  112.49    6.30
   6 -20  -1  112.49    6.50
   6 -20  -1  116.69    6.40
   6 -20  -1  104.29    6.80
   6 -20  -1  104.19    6.60
  -6  20   1  105.79    7.30
   6  20  -1  112.59    6.30
  -6  20   1  101.29    7.10
   6  20  -1  109.69    7.30
  -6  20   1  102.29    7.00
  -6  20   1  109.19    7.20
   4 -20  -1   47.40    3.40
   4 -20  -1   51.89    3.20
  -4 -20   1   57.39    4.80
   4 -20  -1   46.30    3.80
  -4 -20   1   54.19    3.40
  -4 -20   1   49.50    4.10
   4 -20  -1   47.10    3.40
   4 -20  -1   48.90    3.60
  -4 -20   1   54.09    3.60
   4 -20  -1   47.20    3.20
  -4  20   1   58.39    4.40
   4  20  -1   44.90    5.20
   4  20  -1   50.89    4.20
  -4  20   1   58.29    4.40
  -4  20   1   57.39    4.20
   4  20  -1   50.19    3.60
   4  20  -1   50.89    3.40
   4  20  -1   50.49    6.00
  -4  20   1   47.40    5.30
   4  20  -1   48.10    3.40
  -4  20   1   51.19    4.10
  -4  20   1   49.30    4.20
   4  20  -1   48.40    3.40
  -4  20   1   47.90    6.90
  -4  20   1   45.90    4.50
   2 -20  -1   68.49    4.40
   2 -20  -1   68.49    4.30
  -2 -20   1   69.89    4.60
  -2 -20   1   71.29    4.60
   2 -20  -1   69.29    4.60
  -2 -20   1   71.49    5.40
   2 -20  -1   70.89    4.90
   2 -20  -1   70.09    4.30
   2  20  -1   74.19    4.80
   2  20  -1   82.99    5.60
   2  20  -1   73.19    6.80
  -2  20   1   73.89    5.00
  -2  20   1   72.39    6.70
   2  20  -1   73.29    6.40
   2  20  -1   69.49    7.40
   2  20  -1   71.19    4.80
  -2  20   1   77.09    9.30
  -2  20   1   67.09    5.90
  -2  20   1   78.29    8.30
  -2  20   1   78.49    5.20
   2  20  -1   70.79    4.60
   2  20  -1   64.39    5.60
  -2  20   1   77.39    5.10
  -2  20   1   68.99    5.40
   2  20  -1   75.39    4.90
   0 -20   1   77.59    5.00
   0 -20   1   77.99    5.60
   0 -20   1   83.79    5.30
   0 -20  -1   78.89    5.70
   0 -20  -1   84.49    5.00
   0 -20   1   81.79    4.90
   0 -20  -1   86.39    4.90
   0  20   1   83.59    5.40
   0  20  -1   81.69    5.30
   0  20  -1   88.89    5.40
   0  20  -1   81.99    8.00
   0  20   1   83.19    7.20
   0  20   1   80.59    6.10
   0  20  -1   83.59    6.70
   0  20   1   79.79    5.40
   0  20  -1   87.99    5.50
   0  20   1   83.39    5.50
   0  20   1   80.69    6.70
   0  20  -1   90.89    6.10
   0  20   1   79.89    5.30
   0  20  -1   83.99    7.30
   0  20   1   72.59    8.00
   0  20  -1   81.69    5.40
   0  20   1   77.59    5.80
   0  20  -1   85.69    6.10
   2 -20   1   19.10    1.80
   2 -20   1   18.10    1.80
   2 -20   1   17.50    1.60
   2 -20   1   18.80    1.60
   2 -20   1   17.90    1.60
   2 -20   1   19.30    1.90
  -2 -20  -1   19.50    2.50
  -2 -20  -1   21.50    1.80
   2 -20   1   18.30    1.90
   2 -20   1   18.40    1.40
   2  20   1   19.50    2.10
   2  20   1   18.90    1.80
   2  20   1   21.40    2.60
   2  20   1   25.60    2.50
   2  20   1   24.50    3.40
   2  20   1   20.90    1.90
   2  20   1   24.70    4.20
  -2  20  -1   19.10    2.60
   2  20   1   22.00    2.00
  -2  20  -1   23.10    3.50
   2  20   1   19.10    3.00
  -2  20  -1   20.40    2.30
  -4 -20  -1   80.29    6.80
   4 -20   1   83.09    5.50
   4 -20   1   98.09    5.50
   4 -20   1   91.39    5.70
   4 -20   1   91.09    5.30
   4 -20   1   80.49    5.70
  -4 -20  -1   91.59    5.60
  -4  20  -1   84.89    7.70
   4  20   1   79.79    7.20
  -4  20  -1   85.29    6.00
  -4  20  -1   96.19    6.00
  -4  20  -1   80.09    6.30
   4  20   1   85.29    5.20
   4  20   1   84.89    6.10
   4  20   1   88.99    8.50
   4  20   1   94.29    5.40
  -4  20  -1   98.89    6.00
  -4  20  -1   75.49    8.60
   6 -20   1    2.70    0.50
   6 -20   1    4.60    0.80
   6 -20   1    3.10    0.70
   6 -20   1    3.00    1.00
   6 -20   1    3.30    1.00
  -6 -20  -1    4.20    0.90
  -6  20  -1    5.00    1.30
   6  20   1    4.70    0.90
  -6  20  -1    4.00    1.30
   8 -20   1   66.49    3.70
   8 -20   1   63.89    3.60
   8 -20   1   57.89    3.80
  -8 -20  -1   56.69    3.80
   8 -20   1   65.59    3.60
   8  20   1   60.79    3.70
   7 -21  -1  131.39    6.80
   7 -21  -1  127.49    7.10
  -7 -21   1  123.29    7.10
  -7 -21   1  112.09    7.00
   7  21  -1  131.69    6.90
  -7  21   1  109.19    7.10
  -7  21   1  107.49    7.30
  -7  21   1  109.69    7.20
   5 -21  -1  424.56   25.10
  -5 -21   1  450.65   24.70
   5 -21  -1  475.15   25.20
  -5  21   1  428.26   25.10
  -5  21   1  463.75   25.60
  -5  21   1  457.45   25.40
  -5  21   1  466.45   25.40
   5  21  -1  438.06   25.80
   3 -21  -1  248.78   13.60
   3 -21  -1  235.58   13.70
  -3 -21   1  255.07   13.80
   3 -21  -1  243.58   13.50
   3 -21  -1  223.28   13.60
   3 -21  -1  213.38   13.80
   3 -21  -1  232.28   13.70
   3 -21  -1  248.58   13.40
  -3 -21   1  257.37   13.80
   3 -21  -1  235.58   13.90
  -3  21   1  235.58   15.30
   3  21  -1  239.98   17.30
   3  21  -1  240.78   16.50
   3  21  -1  242.68   13.90
   3  21  -1  251.77   13.80
  -3  21   1  241.38   14.80
   3  21  -1  247.78   14.10
  -3  21   1  257.27   14.30
  -3  21   1  239.58   14.20
   3  21  -1  219.28   16.10
  -3  21   1  217.68   17.60
   3  21  -1  249.08   14.80
  -3  21   1  235.38   16.30
  -3  21   1  251.87   14.00
   3  21  -1  269.97   13.80
   1 -21  -1  342.37   20.10
  -1 -21   1  384.76   20.30
   1 -21  -1  322.27   19.80
   1 -21  -1  330.17   20.60
  -1 -21   1  360.06   20.90
  -1  21   1  368.36   24.40
   1  21  -1  356.36   22.90
   1  21  -1  363.06   20.50
   1  21  -1  350.16   20.20
   1  21  -1  320.87   21.20
  -1  21   1  386.56   20.30
  -1  21   1  397.26   21.10
   1  21  -1  363.86   20.30
  -1  21   1  360.56   21.90
  -1  21   1  385.36   20.50
  -1  21   1  389.16   20.60
   1  21  -1  330.87   22.00
   1  21  -1  345.77   20.20
  -1  21   1  365.86   21.30
   1  21  -1  342.87   23.60
  -1  21   1  366.26   22.80
   1  21  -1  386.66   21.30
   1 -21   1   43.10    3.20
   1 -21   1   45.80    2.80
  -1 -21  -1   35.80    3.50
  -1 -21  -1   38.40    2.90
   1 -21   1   41.50    2.80
   1  21   1   45.20    3.20
   1  21   1   45.90    5.80
   1  21   1   46.90    5.00
  -1  21  -1   40.50    3.70
   1  21   1   48.40    3.30
  -1  21  -1   33.30    5.10
   1  21   1   45.40    4.60
  -1  21  -1   34.60    4.50
   1  21   1   44.20    4.00
  -1  21  -1   38.00    3.20
  -1  21  -1   36.50    3.60
  -1  21  -1   38.50    3.20
  -1  21  -1   35.20    3.20
   1  21   1   45.40    3.70
   1  21   1   48.60    3.20
   3 -21   1  162.18   10.30
   3 -21   1  171.88    9.90
  -3 -21  -1  188.98   10.20
   3 -21   1  157.38    9.90
   3 -21   1  157.98   10.10
   3 -21   1  171.68   10.10
  -3 -21  -1  189.28   11.60
   3  21   1  172.78   10.10
   3  21   1  160.28   10.10
  -3  21  -1  185.78   11.00
   3  21   1  173.68   10.00
  -3  21  -1  181.28   14.10
  -3  21  -1  196.88   10.40
  -3  21  -1  191.58   11.60
   3  21   1  168.08   10.90
   3  21   1  159.48   10.20
   3  21   1  157.98   13.30
  -3  21  -1  188.48   12.90
  -3  21  -1  197.88   10.40
   5 -21   1  459.25   27.90
   5 -21   1  491.65   27.90
   5 -21   1  507.55   28.10
  -5 -21  -1  517.05   28.00
   5  21   1  522.35   27.50
  -5  21  -1  519.25   28.10
   5  21   1  462.15   28.40
   5  21   1  530.05   27.80
  -5  21  -1  517.25   28.20
  -5  21  -1  512.85   28.00
   7 -21   1  206.28   12.20
   7 -21   1  217.68   12.20
   7 -21   1  236.18   12.20
   7  21   1  192.88   12.20
   7  21   1  231.28   12.20
   6 -22  -1   20.90    1.60
   6 -22  -1   18.90    1.80
  -6 -22   1   17.50    1.50
   6 -22  -1   20.40    1.40
  -6 -22   1   16.70    1.70
   6 -22  -1   19.40    1.60
   6 -22  -1   19.80    1.40
  -6  22   1   17.20    1.90
  -6  22   1   17.40    2.00
   6  22  -1   18.60    1.20
  -6  22   1   16.40    2.10
  -6  22   1   15.80    1.90
   4 -22  -1   40.40    2.90
   4 -22  -1   44.50    2.70
   4 -22  -1   44.40    2.80
   4 -22  -1   42.80    2.90
   4 -22  -1   47.00    3.20
  -4 -22   1   42.70    3.00
  -4 -22   1   38.50    2.80
   4 -22  -1   40.40    3.10
   4  22  -1   38.90    2.80
   4  22  -1   41.50    2.90
   4  22  -1   42.60    2.90
   4  22  -1   38.20    3.60
   2 -22  -1  221.68   12.30
   2 -22  -1  217.38   12.10
  -2 -22   1  208.98   13.40
   2 -22  -1  193.28   12.50
   2 -22  -1  202.88   12.60
  -2 -22   1  215.88   12.50
   2 -22  -1  213.38   12.20
  -2 -22   1  221.08   12.40
  -2  22   1  224.58   12.90
  -2  22   1  241.28   12.80
   2  22  -1  227.78   13.50
   2  22  -1  218.48   15.20
   2  22  -1  196.88   15.70
  -2  22   1  207.58   14.10
   2  22  -1  225.88   12.80
  -2  22   1  232.68   12.60
  -2  22   1  205.38   13.40
   2  22  -1  230.28   12.50
   2  22  -1  233.38   12.50
  -2  22   1  201.58   14.80
  -2  22   1  214.78   13.30
   0 -22  -1   18.30    1.60
   0 -22   1   18.70    1.50
   0 -22   1   17.50    2.00
   0 -22  -1   18.20    1.50
   0 -22  -1   15.70    2.10
   0 -22   1   19.80    1.90
   0 -22   1   18.70    1.60
   0  22   1   20.80    3.00
   0  22   1   14.30    3.70
   0  22  -1   17.00    2.70
   0  22  -1   18.20    2.40
   0  22  -1   15.20    3.60
   0  22   1   19.30    2.00
   0  22  -1   15.30    3.50
   0  22   1   19.50    2.30
   0  22  -1   16.00    1.80
   0  22  -1   20.00    2.00
   0  22  -1   18.70    2.10
   0  22   1   19.00    2.20
   0  22   1   18.90    3.90
   0  22   1   20.20    2.60
   0  22  -1   20.30    2.40
   2 -22   1   50.99    3.50
   2 -22   1   57.39    3.80
  -2 -22  -1   45.00    4.20
   2 -22   1   50.99    3.30
  -2 -22  -1   47.60    3.50
   2 -22   1   56.99    3.70
   2  22   1   47.50    5.30
  -2  22  -1   46.40    4.60
  -2  22  -1   42.40    6.30
  -2  22  -1   56.69    3.90
   2  22   1   45.80    6.00
  -2  22  -1   52.59    3.80
  -2  22  -1   56.79    3.90
   2  22   1   56.39    3.70
   2  22   1   54.89    4.30
  -2  22  -1   47.90    5.40
   2  22   1   54.79    3.60
  -2  22  -1   52.69    3.70
   2  22   1   55.19    3.80
  -2  22  -1   47.60    4.20
   4 -22   1   64.99    3.80
   4 -22   1   60.59    4.20
   4 -22   1   59.39    4.10
   4 -22   1   55.59    4.00
   4 -22   1   65.29    3.90
  -4 -22  -1   65.59    4.10
   4 -22   1   62.89    4.00
  -4  22  -1   68.09    4.90
   4  22   1   55.79    4.50
   4  22   1   60.89    3.80
  -6 -22  -1   24.20    1.90
   6 -22   1   20.50    1.60
   6 -22   1   21.20    1.80
   6 -22   1   21.90    1.60
   6 -22   1   21.20    1.90
   6 -22   1   21.80    1.70
  -6  22  -1   20.90    2.00
  -6  22  -1   21.50    2.10
   6  22   1   20.30    1.80
  -6  22  -1   21.90    1.90
   7  23  -1  115.09    6.90
  -5 -23   1  141.19    8.30
  -5 -23   1  142.79    8.20
   5 -23  -1  146.19    8.00
   5 -23  -1  147.19    8.30
   5 -23  -1  139.09    8.00
   5 -23  -1  146.39    8.10
  -5  23   1  133.39    8.30
  -5  23   1  138.99    8.50
   5  23  -1  140.89    8.00
  -5  23   1  141.69    8.30
  -5  23   1  136.59    8.40
   3 -23  -1  139.49    8.10
   3 -23  -1  126.09    7.60
   3 -23  -1  136.49    7.80
   3 -23  -1  132.09    7.90
  -3 -23   1  139.39    7.90
  -3 -23   1  146.49    8.00
  -3  23   1  132.49    8.20
   3  23  -1  131.69    8.00
   3  23  -1  120.49    8.10
   3  23  -1  135.79    7.90
  -3  23   1  133.59    8.10
  -3  23   1  143.79    8.10
  -3  23   1  125.89    8.70
  -3  23   1  139.39    8.30
   3  23  -1  132.99    7.90
   3  23  -1  129.29    8.70
  -1 -23   1   66.59    4.20
   1 -23  -1   67.79    4.10
  -1 -23   1   62.19    4.90
   1 -23  -1   65.99    4.40
   1 -23  -1   57.69    4.60
   1 -23  -1   60.09    4.00
  -1 -23   1   68.99    4.50
  -1  23   1   71.59    4.60
  -1  23   1   66.19    4.50
   1  23  -1   68.69    4.70
   1  23  -1   68.49    5.20
   1  23  -1   69.39    4.50
   1  23  -1   68.99    4.40
  -1  23   1   65.29    4.40
  -1  23   1   71.09    5.20
  -1  23   1   70.39    4.70
   1  23  -1   69.49    4.60
  -1 -23  -1   39.00    2.60
   1 -23   1   32.00    2.20
  -1 -23  -1   35.50    3.30
  -1 -23  -1   37.20    2.50
   1 -23   1   31.60    2.70
   1 -23   1   32.40    2.60
   1 -23   1   30.90    2.30
   1 -23   1   29.70    2.40
   1  23   1   32.80    2.70
  -1  23  -1   36.10    3.30
   1  23   1   34.70    2.80
  -1  23  -1   38.80    2.90
   1  23   1   35.50    2.70
   1  23   1   32.00    2.80
   1  23   1   30.80    3.10
   3 -23   1   47.00    3.40
  -3 -23  -1   52.19    3.20
   3 -23   1   40.90    3.10
  -3 -23  -1   49.60    3.30
   3 -23   1   43.80    3.00
   3 -23   1   45.20    3.30
  -3  23  -1   54.89    3.60
   3  23   1   46.30    3.10
   3  23   1   43.30    3.00
  -3  23  -1   49.40    3.50
   3  23   1   48.30    3.10
   3  23   1   46.00    3.80
  -3  23  -1   48.80    4.00
   5 -23   1  117.39    6.70
   5 -23   1  112.79    7.00
  -5 -23  -1  119.19    7.00
   5 -23   1  126.79    6.90
  -5 -23  -1  123.79    6.80
   5 -23   1  105.89    6.80
  -5  23  -1  116.09    7.00
  -5  23  -1  120.39    7.10
   5  23   1  107.79    6.50
  -5  23  -1  120.19    7.00
   6 -24  -1   33.90    2.20
  -6 -24   1   35.80    2.30
  -6  24   1   31.40    2.20
  -6  24   1   32.90    2.40
  -6  24   1   33.30    2.40
   4 -24  -1  212.48   11.80
  -4 -24   1  203.68   12.00
   4 -24  -1  200.58   12.10
  -4 -24   1  200.08   11.90
  -4 -24   1  218.28   12.10
  -4  24   1  203.78   12.30
   4  24  -1  213.98   11.90
   4  24  -1  215.18   11.80
  -4  24   1  221.58   12.10
  -4  24   1  217.08   12.20
  -4  24   1  227.38   12.10
  -2 -24   1  190.98   11.00
   2 -24  -1  177.58   11.00
  -2 -24   1  190.18   11.00
   2 -24  -1  170.18   10.90
  -2 -24   1  185.78   10.90
   2 -24  -1  189.78   10.70
   2 -24  -1  198.08   10.60
  -2  24   1  174.58   11.70
   2  24  -1  210.58   11.00
  -2  24   1  185.28   11.10
   2  24  -1  192.88   11.90
   2  24  -1  191.18   11.20
   2  24  -1  211.08   11.00
   2  24  -1  199.98   11.10
  -2  24   1  198.68   11.10
  -2  24   1  180.18   11.20
  -2  24   1  189.78   11.00
   0 -24   1  280.67   15.70
   0 -24   1  249.88   15.50
   0 -24   1  262.07   15.20
   0 -24  -1  266.07   15.40
   0 -24   1  289.97   15.70
   0 -24  -1  248.18   15.50
   0  24   1  282.67   15.80
   0  24   1  292.47   15.60
   0  24  -1  288.17   15.60
   0  24   1  302.37   15.60
   0  24   1  256.97   16.30
   0  24  -1  283.17   15.70
   0  24  -1  266.87   16.50
   0  24  -1  287.27   15.60
   0  24  -1  264.37   15.80
   0  24   1  283.77   15.70
   2 -24   1  122.89    7.00
  -2 -24  -1  114.29    6.80
  -2 -24  -1  114.19    6.80
   2 -24   1  108.69    6.60
   2 -24   1  104.39    6.90
   2  24   1   98.69    7.40
   2  24   1  102.89    6.90
  -2  24  -1  107.49    7.60
  -2  24  -1  120.39    7.00
  -2  24  -1  123.99    6.90
   2  24   1  109.39    6.80
  -2  24  -1  127.39    7.00
   2  24   1  118.89    6.80
   2  24   1  116.59    6.80
   4 -24   1   86.49    5.60
   4 -24   1   95.49    5.70
   4 -24   1   95.29    5.50
  -4 -24  -1   91.99    5.70
   4 -24   1   94.19    5.90
  -4 -24  -1   97.69    5.70
  -4  24  -1  101.49    5.90
  -4  24  -1   96.29    5.80
   4  24   1   97.59    5.50
  -4  24  -1   94.59    5.90
  -4  24  -1   99.29    5.70
   6 -24   1   22.00    1.60
  -6 -24  -1   22.40    1.70
  -6 -24  -1   20.90    1.50
  -5 -25   1   18.60    1.50
   5 -25  -1   18.80    1.50
   5 -25  -1   19.00    1.30
  -5 -25   1   18.40    1.40
   5  25  -1   18.30    1.20
  -5  25   1   20.70    1.80
  -5  25   1   17.60    1.60
   3 -25  -1   21.10    1.90
  -3 -25   1   19.50    1.70
   3 -25  -1   22.20    1.60
   3 -25  -1   22.30    1.70
  -3 -25   1   23.50    1.90
  -3 -25   1   21.80    1.80
   3  25  -1   21.00    1.80
   3  25  -1   21.90    1.70
   3  25  -1   23.80    1.70
  -3  25   1   24.80    2.10
  -1 -25   1    4.90    0.90
   1 -25  -1    5.60    0.80
  -1 -25   1    6.30    1.10
   1 -25  -1    4.50    1.00
   1 -25  -1    5.40    1.00
  -1 -25   1    7.10    1.30
   1  25  -1    5.30    1.30
   1  25  -1    6.20    1.10
  -1  25   1    7.20    1.30
   1  25  -1    4.10    1.10
  -1  25   1    7.20    1.20
  -1  25   1    4.70    1.20
  -1  25   1    6.90    1.10
   1  25  -1    7.10    1.20
  -1  25   1    5.60    1.10
  -1 -25  -1   97.29    6.10
   1 -25   1   94.79    6.20
   1 -25   1  102.69    6.20
  -1 -25  -1  100.69    5.90
  -1  25  -1  103.79    6.10
  -1  25  -1   98.09    6.80
   1  25   1  102.89    6.10
  -1  25  -1  108.89    6.20
  -1  25  -1   98.69    6.20
   1  25   1   93.19    6.20
   1  25   1  103.39    6.00
  -1  25  -1  100.89    6.30
   3 -25   1    9.50    1.30
   3 -25   1    9.10    1.00
  -3 -25  -1    8.70    1.10
  -3 -25  -1    9.80    1.10
   3 -25   1    9.50    1.10
   3  25   1    9.20    1.00
  -3  25  -1   11.30    1.20
  -3  25  -1    9.30    1.60
  -3  25  -1   10.20    1.40
   5 -25   1   15.00    1.20
  -5 -25  -1   17.30    1.30
  -5 -25  -1   16.10    1.40
   5 -25   1   15.70    1.40
  -5  25  -1   13.70    1.40
  -4 -26   1   60.69    3.80
   4 -26  -1   59.49    3.60
  -4 -26   1   60.59    3.80
   4 -26  -1   62.59    3.90
  -4  26   1   63.39    3.90
  -4  26   1   65.09    3.90
  -4  26   1   60.69    3.80
   4  26  -1   63.89    3.60
   2 -26  -1  206.58   12.60
   2 -26  -1  230.68   12.70
  -2 -26   1  230.18   12.70
  -2 -26   1  207.28   12.40
  -2 -26   1  228.68   12.70
  -2  26   1  229.28   12.60
   2  26  -1  236.78   12.60
   2  26  -1  241.08   12.60
   2  26  -1  222.88   12.60
  -2  26   1  204.68   12.80
  -2  26   1  222.08   12.70
  -2  26   1  222.88   12.60
   0 -26   1  290.67   16.60
   0 -26  -1  282.97   16.60
   0 -26   1  289.27   16.60
   0 -26  -1  289.57   16.50
   0  26   1  303.87   16.60
   0  26   1  314.27   16.50
   0  26  -1  293.87   16.50
   0  26   1  313.27   16.50
   0  26  -1  290.17   16.70
   0  26  -1  316.57   16.50
   0  26   1  265.27   16.70
  -2 -26  -1   89.99    5.30
   2 -26   1   83.99    5.40
  -2 -26  -1   85.39    5.40
   2 -26   1   92.89    5.50
  -2  26  -1   86.19    5.40
  -2  26  -1   83.59    5.50
  -2  26  -1   82.19    5.30
  -2  26  -1   88.59    5.40
   2  26   1   96.39    5.30
   2  26   1   99.09    5.20
   4 -26   1   81.49    5.40
   4 -26   1   90.89    5.20
  -4 -26  -1   95.39    5.40
  -4 -26  -1   96.49    5.30
  -4 -26  -1   92.09    5.40
  -4  26  -1   84.49    5.40
  -4  26  -1   96.79    5.50
  -4  26  -1   94.39    5.30
  -3 -27   1   95.89    5.50
  -3 -27   1   89.19    5.60
  -3 -27   1   88.89    5.50
  -3 -27   1   96.89    5.70
   3 -27  -1   97.49    5.70
  -3  27   1   98.99    5.60
   3  27  -1  101.89    5.50
  -3  27   1   99.69    5.70
  -3  27   1   96.29    5.60
  -1 -27   1  113.09    6.70
  -1 -27   1  110.39    6.60
   1 -27  -1  109.29    6.50
   1 -27  -1  106.39    6.60
  -1  27   1  115.89    6.60
  -1  27   1  119.49    6.60
   1  27  -1  104.19    6.50
  -1  27   1  112.99    6.50
   1  27  -1  112.49    6.50
  -1 -27  -1   12.10    1.10
   1 -27   1   14.50    1.40
  -1 -27  -1   12.50    1.30
  -1 -27  -1   11.70    1.30
   1 -27   1   15.60    1.40
  -1  27  -1   14.20    1.20
   1  27   1   15.70    1.20
   1  27   1   14.00    1.30
  -1  27  -1   11.50    1.50
  -1  27  -1   11.60    1.40
   1  27   1   16.00    1.20
  -3 -27  -1   71.79    4.40
  -3 -27  -1   74.69    4.30
  -3 -27  -1   75.89    4.30
   3 -27   1   70.09    4.40
  -3  27  -1   68.59    4.40
   3  27   1   75.19    4.10
  -3  27  -1   69.99    4.20
  -3  27  -1   73.59    4.40
   0 -28  -1   33.50    2.40
   0 -28   1   38.20    2.50
   0 -28   1   41.30    2.50
   0 -28  -1   37.20    2.50
   0  28  -1   35.30    2.30
   0  28   1   35.10    2.30
   0  28   1   37.40    2.40
   0  28   1   33.80    2.60
   0  28  -1   35.70    2.40
   0  28  -1   35.60    2.40
  10   0  -2  532.45   31.10
  10   0  -2  548.05   29.90
 -10   0   2  563.64   31.80
  10   0  -2  551.54   30.20
   8   0  -2  554.64   34.40
   8   0  -2  672.23   35.10
  -8   0   2  639.94   35.50
   8   0  -2  575.24   35.20
  -8   0   2  656.03   37.60
  -8   0   2  679.13   39.10
  -6   0   2  675.03   39.40
   4   0  -2 1869.91  108.29
   2   0  -2 4724.63  259.67
   2   0   2 6403.26  349.37
  -4   0  -2  237.18   14.60
   4   0   2  282.87   14.30
  -4   0  -2  263.17   14.80
  -4   0  -2  253.57   14.50
  -6   0  -2  400.06   23.60
   6   0   2  426.86   22.20
  -6   0  -2  350.76   23.60
   6   0   2  414.66   22.60
   6   0   2  415.86   22.30
   6   0   2  395.26   22.00
   8   0   2  159.98    9.00
   8   0   2  144.29    8.60
  -8   0  -2  159.88    9.50
  -8   0  -2  153.48   10.60
   8   0   2  164.68    9.00
   8   0   2  138.79    8.70
  -8   0  -2  178.68   11.90
  -8   0  -2  148.69    8.90
   8   0   2  142.59    9.40
  10   0   2  276.77   17.00
  10   0   2  281.07   16.20
 -10   0  -2  288.77   16.60
  10   0   2  325.07   17.80
 -10   0  -2  285.27   17.30
  10   0   2  284.07   16.40
  10   0   2  291.97   16.10
  10   0   2  314.37   16.50
  11  -1  -2    4.60    0.80
 -11  -1   2    1.80    1.30
  11  -1  -2    4.40    0.60
  11  -1  -2    3.20    0.50
  11  -1  -2    4.50    1.40
 -11  -1   2    4.90    1.40
  11  -1  -2    3.40    0.60
 -11   1   2    6.20    1.60
 -11   1   2    2.10    1.40
  11   1  -2    4.20    0.60
   9  -1  -2  225.38   13.30
  -9  -1   2  223.68   14.80
   9  -1  -2  255.57   14.50
   9  -1  -2  257.17   13.20
   9  -1  -2  248.08   13.30
  -9  -1   2  222.48   17.90
  -9  -1   2  259.07   14.10
  -9  -1   2  225.88   16.40
   9  -1  -2  256.87   14.00
   9  -1  -2  242.98   13.50
  -9  -1   2  229.68   14.70
   9   1  -2  248.88   14.30
  -9   1   2  242.28   14.00
  -9   1   2  230.58   18.10
   9   1  -2  239.08   13.20
   9   1  -2  222.08   13.50
  -9   1   2  231.68   14.80
   9   1  -2  211.48   13.30
   9   1  -2  219.88   14.20
  -9   1   2  237.38   16.40
  -7  -1   2   68.89    5.20
   7  -1  -2   68.99    5.00
  -7  -1   2   70.09    5.20
  -7  -1   2   64.39    6.60
  -7  -1   2   68.19    4.60
   7  -1  -2   75.19    4.90
   7  -1  -2   69.29    5.00
  -7  -1   2   70.09    6.50
  -7   1   2   66.29    4.60
  -7   1   2   69.19    5.10
  -7   1   2   75.09    6.40
  -7   1   2   69.99    6.70
   7   1  -2   71.49    4.80
  -7   1   2   67.59    5.10
   5  -1  -2  577.74   31.90
   3  -1  -2 2104.49  132.79
   3   1  -2 2632.04  134.99
   1  -1  -2 1558.44   86.29
   1   1  -2 1511.25   86.79
  -3  -1  -2  664.73   36.20
   5  -1   2  111.89    6.70
  -5  -1  -2  125.79    6.80
  -5  -1  -2  114.29    7.70
  -5   1  -2  118.99    7.80
  -5   1  -2  111.89    7.50
   5   1   2  121.29    6.90
  -5   1  -2  118.39    6.70
   5   1   2  133.59    7.90
  -7  -1  -2   30.10    2.30
   7  -1   2   32.10    2.20
  -7  -1  -2   33.50    3.60
  -7  -1  -2   36.70    4.30
  -7  -1  -2   31.50    2.60
   7  -1   2   36.30    2.70
   7  -1   2   30.40    2.70
   7  -1   2   37.40    2.50
   7  -1   2   24.80    5.00
   7  -1   2   31.20    2.20
   7  -1   2   33.40    2.10
  -7   1  -2   30.70    2.50
   7   1   2   38.30    3.10
  -7   1  -2   27.70    2.20
   7   1   2   33.90    2.40
   7   1   2   25.90    5.10
   7   1   2   32.70    2.10
   7   1   2   33.00    2.40
  -7   1  -2   34.20    4.00
   7   1   2   29.70    2.20
   7   1   2   33.20    2.20
   7   1   2   33.30    2.80
   7   1   2   28.90    2.10
  -7   1  -2   33.90    3.50
   9  -1   2   23.20    1.90
   9  -1   2   29.90    3.20
  -9  -1  -2   23.20    3.90
   9  -1   2   24.30    1.70
   9  -1   2   26.10    2.50
   9  -1   2   21.90    1.80
   9  -1   2   26.30    2.00
   9   1   2   27.10    2.10
  -9   1  -2   22.80    2.10
  -9   1  -2   23.20    3.70
   9   1   2   24.00    1.80
  -9   1  -2   21.70    2.40
  -9   1  -2   18.80    2.70
   9   1   2   25.70    2.50
 -11  -1  -2    8.00    1.60
  11  -1   2   11.70    1.50
  11  -1   2   13.00    1.20
  11  -1   2   12.60    1.20
  11  -1   2   10.00    0.90
  11  -1   2    9.40    1.90
 -11   1  -2    8.90    1.50
 -11   1  -2   10.10    1.60
  11   1   2   11.40    1.50
 -10  -2   2   78.29    6.10
  10  -2  -2   75.89    5.00
 -10  -2   2   77.29    5.40
 -10  -2   2   69.19    5.90
  10   2  -2   80.59    4.50
 -10   2   2   86.39    5.60
  10   2  -2   71.39    4.50
  10   2  -2   69.09    5.40
 -10   2   2   74.69    5.90
  10   2  -2   66.89    4.60
  10   2  -2   74.19    4.30
  -8  -2   2  135.39    9.10
  -8  -2   2  116.39   10.90
   8  -2  -2  148.29    8.80
  -8  -2   2  123.99    8.20
   8  -2  -2  137.79    7.90
  -8  -2   2  130.69    9.00
   8  -2  -2  143.59    7.80
   8  -2  -2  124.59    8.40
  -8  -2   2  141.79   10.90
   8  -2  -2  144.39    7.70
  -8   2   2  133.99    8.90
   8   2  -2  125.19    8.60
  -8   2   2  127.89    8.60
  -8   2   2  122.69   10.00
   8   2  -2  117.99    7.70
  -8   2   2  154.28   12.00
   8   2  -2  143.89    8.60
  -8   2   2  138.79    8.30
  -6  -2   2  125.59    9.40
  -6  -2   2  124.39    9.50
  -6  -2   2  122.79    8.20
  -6  -2   2  124.99    7.90
  -6  -2   2  129.19    7.50
  -6   2   2  121.79    7.90
  -6   2   2  118.49    8.90
   6   2  -2  135.09    7.70
  -6   2   2  118.99    9.30
   6   2  -2  141.79    8.60
  -6   2   2  116.89    7.80
   4  -2  -2 1092.79   67.19
   4   2  -2 1161.38   69.59
   2  -2  -2 4365.56  225.98
   2   2  -2 3845.52  226.88
   2   2   2 2835.42  160.38
  -4  -2  -2  182.98   10.60
  -4  -2  -2  185.38   10.60
  -4  -2  -2  176.78   10.40
  -4  -2  -2  162.18    9.70
  -4   2  -2  172.38    9.90
  -4   2  -2  165.68    9.70
   4   2   2  187.18    9.80
  -4   2  -2  162.18    9.90
   4   2   2  183.88    9.90
  -6  -2  -2  311.17   20.80
   6  -2   2  363.86   19.40
   6  -2   2  376.76   19.50
  -6  -2  -2  318.57   21.30
  -6  -2  -2  342.37   19.30
   6  -2   2  364.56   20.40
   6  -2   2  346.87   19.80
   6  -2   2  336.37   19.50
  -6   2  -2  355.26   20.80
   6   2   2  378.16   19.50
   6   2   2  364.86   19.60
  -6   2  -2  346.47   19.40
   6   2   2  386.56   20.10
   6   2   2  315.57   19.60
   8  -2   2  237.48   12.90
  -8  -2  -2  235.98   14.70
   8  -2   2  208.48   12.50
  -8  -2  -2  218.38   12.70
  -8  -2  -2  229.68   13.30
  -8  -2  -2  232.88   15.90
   8  -2   2  233.18   12.70
   8  -2   2  219.38   12.70
   8  -2   2  219.78   12.40
   8  -2   2  194.18   12.40
  -8   2  -2  206.88   12.60
  -8   2  -2  247.38   15.20
  -8   2  -2  227.08   13.10
  -8   2  -2  234.18   18.60
   8   2   2  238.68   13.30
   8   2   2  211.68   12.60
   8   2   2  203.78   12.40
   8   2   2  233.08   13.60
 -10  -2  -2  164.48   10.60
  10  -2   2  175.08   11.00
  10  -2   2  199.98   10.30
  10  -2   2  201.58   10.40
 -10  -2  -2  168.58   11.30
  10  -2   2  190.48   10.30
  10  -2   2  204.18   10.50
  10   2   2  185.58   11.10
 -10   2  -2  191.08   10.70
  10   2   2  169.48   10.30
 -10   2  -2  189.78   11.30
  10   2   2  167.28   10.20
  10   2   2  176.18   10.10
  10   2   2  164.98   11.30
  10   2   2  178.48   10.40
  11  -3  -2   99.89    5.30
  11  -3  -2   89.49    5.00
  11  -3  -2   90.59    5.10
  11  -3  -2   81.19    6.10
 -11  -3   2   82.69    5.90
 -11  -3   2   79.09    6.30
  11  -3  -2   97.49    5.30
 -11   3   2   93.99    6.20
  11   3  -2   78.99    5.20
  11   3  -2   83.69    6.00
  11   3  -2   89.69    5.10
 -11   3   2   87.69    6.40
  11   3  -2   99.69    5.20
   9  -3  -2  395.26   24.30
  -9  -3   2  437.26   25.80
  -9  -3   2  428.16   27.90
   9  -3  -2  471.95   25.50
  -9  -3   2  450.25   25.90
   9  -3  -2  469.15   24.90
   9  -3  -2  421.36   24.00
  -9  -3   2  481.15   29.90
  -9   3   2  459.55   25.80
   9   3  -2  386.46   24.30
  -9   3   2  410.46   26.90
   9   3  -2  473.95   25.20
  -7  -3   2  195.08   11.80
  -7  -3   2  210.38   12.80
   7  -3  -2  223.08   12.40
  -7  -3   2  195.48   12.50
  -7  -3   2  211.48   14.80
  -7  -3   2  208.78   14.50
   7  -3  -2  195.18   11.60
   7  -3  -2  202.98   11.40
   7  -3  -2  197.78   12.20
  -7   3   2  195.48   14.60
   7   3  -2  212.78   12.10
  -7   3   2  216.08   12.50
  -7   3   2  201.18   12.20
  -7   3   2  220.58   13.80
  -7   3   2  203.38   11.80
   7   3  -2  176.18   12.10
   7   3  -2  203.78   13.00
   5  -3  -2 2972.50  171.28
   5   3  -2 3118.49  175.48
   3  -3  -2  573.84   36.60
   3   3  -2  599.94   39.30
  -1  -3   2  203.68   12.00
  -1   3   2  213.18   13.10
  -1   3   2  217.68   13.80
   1   3   2 2127.79  124.69
   3   3   2  766.72   48.00
  -5  -3  -2   98.19    6.80
  -5  -3  -2  111.69    7.40
  -5  -3  -2   99.09    5.70
  -5   3  -2   93.29    6.00
  -5   3  -2   98.09    6.40
  -5   3  -2   93.39    5.80
   7  -3   2  297.27   16.00
  -7  -3  -2  291.47   16.10
  -7  -3  -2  269.57   15.60
   7  -3   2  248.28   15.40
  -7  -3  -2  256.87   18.00
  -7  -3  -2  305.17   17.60
  -7  -3  -2  262.67   18.30
   7  -3   2  274.17   15.40
   7  -3   2  307.67   16.20
   7  -3   2  301.77   15.70
   7  -3   2  288.17   15.70
   7   3   2  288.17   15.70
  -7   3  -2  296.97   17.50
   7   3   2  276.27   15.80
   7   3   2  257.37   15.50
  -7   3  -2  260.67   16.90
  -7   3  -2  249.18   15.70
   7   3   2  297.27   16.40
   9  -3   2  177.98   10.10
  -9  -3  -2  166.88   11.80
   9  -3   2  175.18   10.00
  -9  -3  -2  176.88   10.40
   9  -3   2  180.58   10.20
   9  -3   2  164.98    9.90
  -9  -3  -2  176.28   11.00
   9  -3   2  183.78   10.20
   9  -3   2  171.08    9.80
   9  -3   2  189.38   11.60
  -9   3  -2  183.28   10.30
  -9   3  -2  175.58   10.80
   9   3   2  162.98   10.70
  -9   3  -2  199.28   12.70
   9   3   2  187.78   11.20
   9   3   2  173.18   10.10
   9   3   2  172.78    9.80
   9   3   2  157.38    9.90
  11  -3   2   60.09    3.70
  11  -3   2   61.99    3.60
  11  -3   2   55.19    3.70
 -11  -3  -2   61.29    4.60
  11  -3   2   66.39    3.50
 -11  -3  -2   63.79    4.10
  11  -3   2   65.39    4.20
  11   3   2   55.19    4.50
  11   3   2   55.39    3.70
 -11   3  -2   67.49    4.10
  11   3   2   59.89    4.20
  11   3   2   61.29    3.50
  11   3   2   63.99    3.80
  10  -4  -2   30.90    2.20
 -10  -4   2   26.20    3.10
  10  -4  -2   28.20    2.00
  10  -4  -2   26.50    1.90
 -10  -4   2   25.50    3.20
  10  -4  -2   29.20    3.20
  10  -4  -2   26.30    2.60
 -10  -4   2   25.90    3.00
  10   4  -2   27.80    2.80
 -10   4   2   34.70    3.30
  10   4  -2   26.20    2.00
  10   4  -2   25.60    2.10
  -8  -4   2   96.89    7.40
   8  -4  -2  109.19    7.00
  -8  -4   2  103.79    9.60
   8  -4  -2  104.39    6.00
   8  -4  -2  107.89    7.00
   8  -4  -2   98.19    6.20
  -8  -4   2   94.29    7.20
   8  -4  -2  108.79    7.20
   8  -4  -2  104.39    6.10
  -8  -4   2  102.19    6.60
  -8  -4   2  101.29    9.20
  -8   4   2  106.99   10.00
  -8   4   2  107.09    8.40
   8   4  -2  111.79    6.90
  -8   4   2  100.39    7.20
   8   4  -2   88.29    6.70
  -8   4   2  109.39    6.70
   8   4  -2   93.49    6.20
  -6  -4   2  141.19    9.00
   6  -4  -2  142.39    7.80
  -6  -4   2  133.39   10.30
  -6  -4   2  129.49    8.10
  -6  -4   2  136.59    8.70
  -6  -4   2  146.39   10.50
   6   4  -2  146.69    8.40
  -6   4   2  124.09    8.10
  -6   4   2  134.49    8.60
  -6   4   2  146.29    9.60
  -6   4   2  133.79    8.30
   6   4  -2  145.49    9.30
  -6   4   2  135.19   10.30
  -4  -4   2  436.16   23.70
   4  -4  -2  377.56   23.00
  -4   4   2  451.65   24.80
   4   4  -2  426.66   23.40
   4   4  -2  409.66   23.70
   2  -4  -2  622.84   39.90
   2   4  -2  725.43   43.60
   0  -4   2 4360.56  238.68
  -2  -4  -2   71.29    4.20
  -2  -4  -2   72.39    4.10
   2   4   2   59.89    3.60
   2   4   2   62.89    4.30
   2   4   2   55.79    3.80
   2   4   2   58.09    3.80
   2   4   2   58.79    3.70
   2   4   2   71.69    5.00
  -4  -4  -2  103.59    5.90
  -4  -4  -2  113.09    6.80
  -4  -4  -2  108.59    7.10
   4   4   2   95.99    5.90
  -4   4  -2   95.39    5.80
   4   4   2  100.59    6.30
   4   4   2  103.89    7.00
  -4   4  -2  107.89    5.70
   6  -4   2  289.17   16.80
   6  -4   2  302.07   16.50
  -6  -4  -2  320.57   16.80
   6  -4   2  292.87   17.40
   6  -4   2  284.87   16.40
  -6  -4  -2  286.17   16.40
  -6  -4  -2  282.37   21.80
   6  -4   2  309.37   16.60
  -6   4  -2  276.97   17.60
   6   4   2  307.07   17.00
   6   4   2  309.27   16.60
   6   4   2  284.57   16.50
  -6   4  -2  305.67   17.60
   6   4   2  290.17   16.90
  -8  -4  -2   22.40    2.00
  -8  -4  -2   22.00    2.40
  -8  -4  -2   18.80    3.00
   8  -4   2   23.00    1.50
   8  -4   2   24.30    2.20
   8  -4   2   21.80    1.60
   8  -4   2   19.60    1.80
   8  -4   2   21.60    1.80
   8  -4   2   22.80    2.20
  -8  -4  -2   21.60    3.90
   8  -4   2   19.80    1.90
   8  -4   2   19.40    1.70
  -8  -4  -2   20.00    4.20
  -8   4  -2   20.90    3.10
   8   4   2   24.00    2.30
   8   4   2   24.00    2.50
   8   4   2   20.40    1.80
  -8   4  -2   18.90    2.00
   8   4   2   19.60    1.60
  -8   4  -2   21.10    2.60
   8   4   2   22.70    2.00
 -10  -4  -2   26.40    2.30
  10  -4   2   27.50    2.10
  10  -4   2   26.70    2.00
 -10  -4  -2   26.20    3.20
 -10  -4  -2   26.20    2.90
  10  -4   2   25.80    2.50
  10  -4   2   28.70    2.10
  10   4   2   24.60    2.00
  10   4   2   23.10    1.80
  10   4   2   25.60    1.70
 -10   4  -2   28.40    2.70
  10   4   2   26.10    2.50
  10   4   2   23.50    2.80
 -10   4  -2   26.90    2.40
  10   4   2   26.50    2.10
  11  -5  -2   43.10    2.80
  11  -5  -2   41.50    2.60
 -11  -5   2   42.60    3.50
  11  -5  -2   41.10    2.50
  11  -5  -2   44.20    2.80
 -11  -5   2   48.60    3.80
 -11   5   2   42.80    3.80
 -11   5   2   48.70    3.90
  11   5  -2   40.20    2.60
  11   5  -2   38.30    3.40
  11   5  -2   42.60    2.70
   9  -5  -2  147.39    9.70
   9  -5  -2  178.38    9.90
  -9  -5   2  186.88   11.40
   9  -5  -2  175.98    9.60
  -9  -5   2  165.18   13.20
   9  -5  -2  175.18   10.50
   9  -5  -2  182.28    9.80
  -9  -5   2  157.78   13.90
  -9  -5   2  163.68   11.30
   9  -5  -2  165.58    9.50
   9  -5  -2  176.58   11.00
  -9   5   2  172.68   10.50
   9   5  -2  150.68   10.30
  -9   5   2  167.28   11.00
  -9   5   2  156.38   11.90
   9   5  -2  185.58   10.60
  -7  -5   2  310.57   17.10
   7  -5  -2  265.27   16.50
  -7  -5   2  311.67   19.60
   7  -5  -2  275.47   15.80
  -7  -5   2  294.77   16.20
  -7  -5   2  304.27   17.40
   7  -5  -2  256.67   15.90
  -7  -5   2  309.27   19.50
   7  -5  -2  289.57   15.80
   7   5  -2  258.77   17.40
  -7   5   2  292.87   16.30
  -7   5   2  292.87   19.80
   7   5  -2  278.47   16.40
  -7   5   2  288.47   16.90
   7   5  -2  260.17   15.80
   5   5  -2 1178.78   64.99
   5   5  -2 1182.28   64.59
   3  -5  -2  662.23   42.20
   3   5  -2  744.23   47.50
  -1   5   2 9999.00  552.34
   1   5   2  372.26   21.60
  -1   5  -2  340.37   20.40
   1   5   2  377.56   21.40
   3   5   2  813.62   44.60
   5   5   2  923.11   59.29
   7  -5   2  699.03   36.20
  -7  -5  -2  614.44   38.50
   7  -5   2  666.33   35.50
   7  -5   2  615.04   35.60
   7  -5   2  663.43   36.10
  -7  -5  -2  724.33   39.50
  -7  -5  -2  714.23   37.80
   7  -5   2  663.53   35.80
   7  -5   2  606.94   35.50
  -7   5  -2  597.24   36.70
  -7   5  -2  700.63   37.40
  -7   5  -2  591.14   35.80
   7   5   2  636.44   35.60
   9  -5   2  249.18   13.70
   9  -5   2  233.18   13.60
   9  -5   2  220.58   13.30
  -9  -5  -2  264.07   14.60
  -9  -5  -2  254.07   13.90
   9  -5   2  239.38   13.50
  -9  -5  -2  211.08   16.90
   9  -5   2  233.28   15.10
   9  -5   2  252.67   14.30
  -9  -5  -2  256.47   15.50
   9   5   2  225.68   13.70
   9   5   2  247.48   13.30
   9   5   2  236.48   13.60
   9   5   2  211.28   13.30
  -9   5  -2  243.58   14.30
   9   5   2  214.08   14.10
  -9   5  -2  270.27   15.60
   9   5   2  250.27   14.50
  -9   5  -2  259.27   13.80
  11  -5   2  131.19    7.40
  11  -5   2  137.49    7.20
 -11  -5  -2  131.89    7.70
  11  -5   2  129.29    7.40
  11  -5   2  125.49    7.80
 -11  -5  -2  133.59    8.30
  11  -5   2  135.59    7.20
  11   5   2  125.49    8.20
  11   5   2  143.29    7.50
  11   5   2  115.09    7.30
  11   5   2  120.39    7.10
  11   5   2  124.49    7.70
  10  -6  -2   27.70    1.90
  10  -6  -2   32.80    2.30
 -10  -6   2   28.80    3.20
 -10  -6   2   23.10    3.00
 -10  -6   2   26.90    2.80
  10  -6  -2   30.20    2.70
  10  -6  -2   30.60    2.20
  10  -6  -2   25.50    3.10
  10  -6  -2   30.60    2.00
  10   6  -2   27.70    2.80
 -10   6   2   28.00    3.10
  10   6  -2   29.00    2.10
 -10   6   2   29.10    3.20
   8  -6  -2  125.69    7.10
  -8  -6   2  128.99    7.70
   8  -6  -2  119.99    7.00
  -8  -6   2  129.49   11.10
  -8  -6   2  126.59    8.80
  -8  -6   2  134.59   10.90
  -8  -6   2  133.29    8.60
   8  -6  -2  115.19    8.00
   8  -6  -2  121.09    7.20
   8  -6  -2  109.49    7.10
   8  -6  -2  122.09    7.30
  -8   6   2  122.19    9.30
  -8   6   2  122.79    7.80
  -8   6   2  127.09    8.40
   8   6  -2  120.79    8.90
   8   6  -2  125.69    7.90
   6  -6  -2   49.50    3.30
  -6  -6   2   51.19    5.60
  -6  -6   2   55.29    4.50
  -6  -6   2   57.99    5.70
   6  -6  -2   55.19    3.40
   6  -6  -2   53.59    3.20
   6  -6  -2   58.19    4.00
  -6  -6   2   46.70    4.00
   6  -6  -2   46.80    3.90
  -6  -6   2   53.19    3.60
  -6   6   2   54.89    5.90
   6   6  -2   51.69    4.60
  -6   6   2   55.39    4.80
  -6   6   2   54.99    4.10
   6   6  -2   48.40    3.80
  -4  -6   2  274.47   16.30
  -4  -6   2  308.67   18.10
  -4  -6   2  306.07   17.00
  -4  -6   2  286.87   16.70
  -4   6   2  327.57   18.70
  -4   6   2  317.07   16.40
   4   6  -2  257.87   16.20
   4   6  -2  282.47   16.70
  -4   6   2  321.07   17.40
   4   6  -2  279.87   17.00
  -4   6   2  282.97   16.70
   4   6  -2  288.47   16.60
   2   6  -2 1230.78   75.09
   0   6   2  185.58   10.80
   0   6   2  172.88   11.40
   0   6  -2  185.48   11.00
   0   6   2  199.58   10.80
  -2  -6  -2  146.19    8.40
  -2  -6  -2  131.59    8.40
   2   6   2  135.49    7.90
   2   6   2  134.19    8.00
   2   6   2  145.29    8.70
   2   6   2  136.09    8.10
   2   6   2  129.79    7.70
   2   6   2  145.09    9.30
  -4  -6  -2   28.50    3.10
  -4  -6  -2   24.70    1.80
  -4  -6  -2   23.40    2.50
  -4  -6  -2   23.30    1.70
   4   6   2   28.00    1.90
   4   6   2   30.10    2.90
   4   6   2   28.80    2.20
   6  -6   2  247.48   13.80
  -6  -6  -2  266.57   16.80
   6  -6   2  251.97   14.10
   6  -6   2  273.27   15.10
   6  -6   2  251.87   14.60
  -6  -6  -2  237.18   15.90
   6  -6   2  243.58   14.00
   6  -6   2  286.67   14.60
  -6  -6  -2  267.17   14.40
   6  -6   2  241.98   14.00
   6  -6   2  245.88   13.90
   6   6   2  225.68   14.40
   6   6   2  248.58   14.00
   6   6   2  233.98   14.10
  -6   6  -2  251.37   15.00
   6   6   2  262.17   14.50
  -6   6  -2  233.58   18.50
   6   6   2  240.78   14.70
   6   6   2  242.58   14.20
  -6   6  -2  268.57   14.90
   6   6   2  247.68   14.00
   8  -6   2   43.30    2.60
   8  -6   2   39.10    3.00
  -8  -6  -2   41.70    5.60
   8  -6   2   47.30    4.50
  -8  -6  -2   42.60    4.50
   8  -6   2   42.30    2.90
   8  -6   2   41.10    2.80
   8  -6   2   48.00    3.00
  -8  -6  -2   35.90    5.00
   8  -6   2   42.00    2.70
  -8  -6  -2   41.00    3.10
   8  -6   2   48.00    3.50
   8  -6   2   41.30    3.30
  -8  -6  -2   40.70    3.60
  -8   6  -2   41.50    4.00
   8   6   2   44.80    3.10
   8   6   2   42.90    3.60
  -8   6  -2   37.80    3.10
   8   6   2   37.20    2.70
   8   6   2   39.00    3.40
   8   6   2   43.40    3.00
 -10  -6  -2  108.29    6.00
  10  -6   2   86.09    5.70
 -10  -6  -2  105.59    6.70
 -10  -6  -2  110.69    7.80
  10  -6   2   83.89    6.00
  10  -6   2  102.09    5.70
  10  -6   2   92.39    6.90
  10  -6   2   91.89    5.60
  10  -6   2  101.39    5.60
  10  -6   2   89.99    5.40
  10   6   2   95.49    5.80
 -10   6  -2   98.19    6.40
  10   6   2   93.29    6.50
  10   6   2   88.59    5.60
  10   6   2   91.69    5.40
  10   6   2   82.19    6.00
  11  -7  -2   47.10    3.30
  11  -7  -2   52.19    3.10
  11  -7  -2   50.59    3.10
  11  -7  -2   53.69    3.30
 -11   7   2   58.59    4.40
  11   7  -2   47.80    3.80
  11   7  -2   54.59    3.10
 -11   7   2   57.79    4.40
  11   7  -2   54.89    3.20
  -9  -7   2   60.29    7.90
   9  -7  -2   50.89    4.20
   9  -7  -2   57.09    3.30
  -9  -7   2   60.09    6.70
   9  -7  -2   46.60    3.40
   9  -7  -2   50.19    3.30
   9  -7  -2   56.39    3.50
   9  -7  -2   46.20    3.50
   9  -7  -2   46.80    4.60
   9   7  -2   57.19    4.20
  -9   7   2   60.39    4.60
  -9   7   2   58.19    5.40
  -7  -7   2  217.98   12.30
   7  -7  -2  211.18   12.10
  -7  -7   2  233.18   15.80
  -7  -7   2  223.78   13.10
   7  -7  -2  212.28   12.00
   7  -7  -2  203.48   12.10
   7  -7  -2  198.18   11.80
  -7  -7   2  206.08   15.30
   7  -7  -2  200.28   12.70
  -7  -7   2  225.38   13.60
   7   7  -2  195.08   11.90
   7   7  -2  224.68   12.70
  -7   7   2  223.28   13.10
  -7   7   2  240.18   16.90
   7   7  -2  212.68   13.80
  -7   7   2  224.48   14.10
  -7   7   2  207.78   12.50
   7   7  -2  186.68   12.40
  -5  -7   2 1074.69   53.59
  -5  -7   2  986.50   54.79
   5   7  -2  893.61   52.79
   5   7  -2  885.01   53.19
  -3  -7   2  320.97   17.40
  -3  -7   2  280.27   17.00
  -3  -7   2  332.67   18.40
  -3   7   2  306.97   20.60
   3   7  -2  278.07   17.60
   3   7  -2  280.57   17.40
   3   7  -2  288.27   17.10
  -3   7   2  313.87   17.20
  -3   7   2  338.07   19.60
  -1   7   2 2685.53  162.78
   1   7   2  445.86   26.90
  -1   7  -2  467.15   27.00
   1   7   2  462.25   27.80
   1   7   2  488.75   27.90
  -1   7  -2  507.75   27.10
  -3  -7  -2  490.85   30.60
   3   7   2  580.24   30.60
   3   7   2  582.14   30.30
  -5   7  -2  651.43   35.80
   5   7   2  638.14   36.00
   5   7   2  683.73   36.70
   7  -7   2  158.18    9.40
   7  -7   2  144.39    8.60
   7  -7   2  149.79    8.90
   7  -7   2  155.18    9.30
  -7  -7  -2  166.28   12.40
   7  -7   2  152.68    8.90
  -7  -7  -2  150.38   11.50
   7  -7   2  148.09    8.90
   7  -7   2  137.99    8.70
   7  -7   2  152.08    8.70
   7  -7   2  162.48    9.30
  -7  -7  -2  167.48    9.50
  -7  -7  -2  162.68   10.60
  -7  -7  -2  151.38    8.90
  -7   7  -2  159.98   10.00
   7   7   2  150.78    9.10
   7   7   2  160.58    9.50
   7   7   2  163.08   10.50
   7   7   2  171.48    9.60
  -7   7  -2  137.49    8.90
   7   7   2  142.29    8.80
   7   7   2  149.79    8.90
   9  -7   2  252.47   13.80
   9  -7   2  274.27   14.30
   9  -7   2  247.88   13.70
   9  -7   2  275.37   14.10
   9  -7   2  243.98   15.60
   9  -7   2  236.38   14.50
  -9  -7  -2  252.47   14.20
   9  -7   2  229.98   13.90
   9  -7   2  237.48   13.90
   9  -7   2  232.78   14.10
  -9  -7  -2  250.87   15.80
  -9  -7  -2  273.07   15.10
   9   7   2  241.88   14.00
   9   7   2  229.68   14.70
   9   7   2  255.27   13.70
  -9   7  -2  252.57   14.70
   9   7   2  240.98   14.50
  11  -7   2   73.59    4.00
  11  -7   2   74.19    4.10
  11  -7   2   59.19    4.90
  11  -7   2   76.09    4.00
  11  -7   2   71.09    4.20
  11   7   2   66.19    4.80
  11   7   2   64.49    4.30
  10  -8  -2   54.09    3.60
 -10  -8   2   55.09    4.70
  10  -8  -2   63.99    3.80
  10  -8  -2   51.49    4.70
  10  -8  -2   58.19    3.60
 -10  -8   2   69.69    6.10
  10  -8  -2   64.89    4.30
  10  -8  -2   60.49    3.80
 -10   8   2   60.29    4.80
 -10   8   2   60.79    4.90
  10   8  -2   62.49    4.50
  -8  -8   2   22.50    4.60
   8  -8  -2   13.70    1.60
   8  -8  -2   11.40    1.40
   8  -8  -2   12.70    2.50
   8  -8  -2   14.80    1.30
   8  -8  -2   12.60    2.30
   8  -8  -2   13.10    1.30
   8   8  -2   12.80    1.30
  -8   8   2   19.60    2.90
  -8   8   2   17.60    7.40
   8   8  -2   15.80    2.50
   8   8  -2   13.00    1.70
   8   8  -2   14.80    1.80
   8   8  -2   11.90    1.40
   6  -8  -2  221.88   13.20
  -6  -8   2  238.18   13.50
   6  -8  -2  227.48   13.40
   6  -8  -2  231.78   13.40
  -6  -8   2  235.78   14.10
  -6  -8   2  268.97   16.70
  -6  -8   2  263.47   14.80
  -6  -8   2  256.87   16.40
   6  -8  -2  238.98   13.30
   6  -8  -2  223.18   14.00
   6  -8  -2  228.08   14.40
  -6   8   2  234.48   14.20
   6   8  -2  228.78   15.00
   6   8  -2  238.08   14.00
  -6   8   2  232.68   13.80
  -6   8   2  252.17   17.70
  -4  -8   2  693.33   40.10
  -4   8   2  777.52   41.70
   4   8  -2  684.73   38.60
   4   8  -2  640.04   39.00
   2   8  -2  970.70   63.99
   0   8   2  548.65   34.20
   0   8   2  607.14   31.90
   2   8   2 1173.68   78.39
  -4  -8  -2  630.84   36.40
   6  -8   2  395.56   21.80
   6  -8   2  392.26   21.50
  -6  -8  -2  396.36   23.00
   6  -8   2  368.46   21.30
   6  -8   2  363.56   21.20
  -6  -8  -2  397.16   23.70
   6  -8   2  399.36   21.20
   6  -8   2  413.26   23.00
  -6  -8  -2  416.36   24.50
   6  -8   2  429.66   21.90
   6  -8   2  397.76   22.00
  -6  -8  -2  365.96   21.80
   6  -8   2  380.46   21.30
   6  -8   2  395.96   22.40
   6   8   2  345.07   21.40
   6   8   2  363.76   22.10
   6   8   2  377.56   23.50
   6   8   2  364.06   21.30
   8  -8   2  155.08    9.50
   8  -8   2  172.58    9.40
   8  -8   2  174.88   10.20
  -8  -8  -2  180.78   11.60
  -8  -8  -2  167.88   13.30
  -8  -8  -2  154.78   12.80
   8  -8   2  159.78    9.90
   8  -8   2  164.18    9.70
  -8  -8  -2  176.18    9.80
   8  -8   2  171.58    9.50
   8  -8   2  154.98   11.20
  -8  -8  -2  181.58   10.60
   8  -8   2  167.38    9.80
   8  -8   2  167.98    9.60
   8  -8   2  169.08   10.10
  -8   8  -2  143.89   10.50
   8   8   2  174.48    9.70
   8   8   2  166.08    9.90
  -8   8  -2  171.78   10.10
   8   8   2  166.48   10.30
  10  -8   2   54.69    3.40
 -10  -8  -2   51.79    4.10
  10  -8   2   52.89    3.70
  10  -8   2   45.90    3.30
  10  -8   2   51.89    3.30
  10  -8   2   52.79    3.20
  10  -8   2   54.69    3.10
  10  -8   2   51.99    4.70
 -10  -8  -2   49.90    3.50
  10   8   2   46.30    3.30
  10   8   2   49.99    3.60
  10   8   2   44.90    3.30
 -10   8  -2   54.59    3.90
  10   8   2   47.50    3.00
 -10   8  -2   58.09    4.10
  10   8   2   50.59    4.00
  11  -9  -2   26.20    2.20
  11  -9  -2   22.30    1.80
  11  -9  -2   24.80    1.60
  11  -9  -2   24.70    1.80
  11  -9  -2   27.00    1.60
  11   9  -2   26.20    1.60
  11   9  -2   23.20    2.30
 -11   9   2   20.60    2.90
  11   9  -2   26.60    1.70
  -9  -9   2  108.59    7.70
   9  -9  -2  100.29    6.70
   9  -9  -2   95.89    7.30
   9  -9  -2   92.49    5.90
   9  -9  -2  106.69    6.00
   9  -9  -2  100.09    6.10
  -9  -9   2  105.29    7.30
  -9  -9   2  110.09    6.60
   9  -9  -2  103.49    6.20
   9   9  -2   89.99    6.00
  -9   9   2  101.19    7.30
   9   9  -2  107.39    6.80
  -9   9   2  106.49    7.20
   7  -9  -2  147.59   10.20
  -7  -9   2  189.78   13.30
   7  -9  -2  170.98    9.50
   7  -9  -2  157.98    9.30
   7  -9  -2  161.58    9.50
   7  -9  -2  150.18    9.30
  -7  -9   2  157.78   12.70
  -7  -9   2  185.78   11.10
   7  -9  -2  154.08   10.70
  -7  -9   2  174.58   10.60
  -7  -9   2  165.08    9.80
   7  -9  -2  161.38    9.80
   7  -9  -2  181.18    9.40
   7   9  -2  162.58   10.20
   7   9  -2  163.58   11.40
   7   9  -2  143.69    9.40
  -7   9   2  173.58   10.60
  -7   9   2  168.48   10.20
  -7   9   2  178.28   11.50
   5  -9  -2  265.57   14.70
   5  -9  -2  252.37   14.70
  -5  -9   2  259.17   14.90
  -5  -9   2  263.17   15.50
   5  -9  -2  258.67   14.90
  -5  -9   2  286.07   16.00
   5  -9  -2  262.37   15.50
  -5  -9   2  276.67   16.20
  -5  -9   2  270.47   17.20
  -5  -9   2  293.97   17.70
   5  -9  -2  260.07   14.80
   5   9  -2  271.77   15.50
   5   9  -2  255.07   14.70
   5   9  -2  252.47   15.60
   5   9  -2  279.57   16.60
  -5   9   2  265.87   15.60
   5   9  -2  282.97   17.10
   5   9  -2  250.47   14.90
  -5   9   2  253.77   15.30
   5   9  -2  253.57   16.10
   5   9  -2  256.67   14.80
  -5   9   2  290.17   16.40
  -5   9   2  285.17   19.10
  -3  -9   2  172.08   11.10
  -3  -9   2  184.58   10.50
  -3  -9   2  167.38   11.20
  -3  -9   2  156.88   10.20
  -3   9   2  171.68   10.30
   3   9  -2  164.88    9.80
   3   9  -2  179.18   10.20
   3   9  -2  165.48    9.80
  -3   9   2  178.78   10.70
   3   9  -2  186.48   10.80
   3   9  -2  174.18   10.90
  -3   9   2  155.78   12.80
   3   9  -2  181.68   10.30
  -3   9   2  147.19   13.40
   3   9  -2  187.98   11.30
   1  -9  -2  110.69    7.40
  -1  -9   2  117.19    7.00
   1  -9  -2  109.99    6.80
  -1  -9   2  113.69    7.20
  -1  -9   2  127.89    7.00
  -1   9   2  112.29    7.30
  -1   9   2  107.69    7.20
   1   9  -2  116.89    7.00
  -1   9   2  128.79    8.70
   1   9  -2  121.89    7.30
  -1   9   2  120.99    7.50
   1   9  -2  124.69    7.00
   1   9  -2  113.39    7.80
   1   9  -2  108.59    6.70
   1   9  -2  115.19    7.60
  -1  -9  -2  224.68   12.30
  -1  -9  -2  245.78   12.70
  -1   9  -2  222.88   13.90
   1   9   2  196.18   14.30
  -1   9  -2  250.97   14.20
   1   9   2  217.58   12.90
   1   9   2  229.48   14.70
  -1   9  -2  243.38   13.30
   1   9   2  221.28   12.70
   1   9   2  216.58   12.90
   1   9   2  199.28   13.60
  -1   9  -2  192.08   13.80
  -3  -9  -2  227.58   12.60
  -3  -9  -2  237.58   14.20
  -3  -9  -2  217.48   13.20
  -3  -9  -2  230.38   13.40
  -3  -9  -2  236.58   13.60
  -3   9  -2  212.28   12.70
   3   9   2  229.88   14.20
   3   9   2  232.88   13.20
   3   9   2  216.28   12.90
   3   9   2  207.78   12.60
   3   9   2  224.38   13.20
   5  -9   2  246.78   13.80
   5  -9   2  252.97   15.40
   5  -9   2  245.28   13.90
   5  -9   2  240.58   13.90
   5  -9   2  245.18   14.20
   5  -9   2  238.58   13.70
   5  -9   2  238.28   14.60
   5  -9   2  261.57   14.40
   5  -9   2  254.07   13.80
   5  -9   2  238.58   13.70
  -5  -9  -2  256.87   15.20
  -5  -9  -2  262.07   15.70
  -5  -9  -2  246.38   14.10
  -5  -9  -2  262.87   16.40
   5   9   2  261.97   16.00
   5   9   2  243.88   14.70
   5   9   2  240.18   14.00
  -5   9  -2  220.78   13.80
  -7  -9  -2  115.49    9.40
   7  -9   2  112.59    6.70
   7  -9   2  115.99    7.20
   7  -9   2  109.09    6.40
   7  -9   2  116.29    8.40
  -7  -9  -2  107.29    6.70
   7  -9   2  110.29    6.80
  -7  -9  -2  112.29    7.30
  -7  -9  -2  109.19    8.30
  -7  -9  -2  114.89   10.00
   7  -9   2  124.69    7.30
   7  -9   2  110.79    6.70
   7  -9   2  110.19    6.60
   7  -9   2  113.69    6.50
   7   9   2  120.99    6.90
   7   9   2  113.69    6.70
  -7   9  -2   99.29    6.70
   7   9   2  114.79    6.60
   7   9   2  103.79    7.10
  -7   9  -2  113.09    7.40
   7   9   2  113.39    7.20
   9  -9   2    6.50    1.20
  -9  -9  -2    7.40    1.30
  -9  -9  -2    5.50    1.70
   9  -9   2    6.20    1.40
   9  -9   2    7.00    1.20
  -9  -9  -2    6.30    1.50
   9  -9   2    6.10    0.90
   9  -9   2    6.30    1.10
   9  -9   2    5.30    1.90
   9  -9   2    8.80    1.50
   9  -9   2    6.80    0.80
   9   9   2    4.50    0.90
  -9   9  -2    8.40    1.40
   9   9   2    5.70    1.10
   9   9   2    6.50    1.20
   9   9   2    6.70    1.50
  -9   9  -2    8.20    5.50
  11  -9   2    6.10    0.70
  11  -9   2    5.00    1.20
  11  -9   2    6.40    0.50
  11   9   2    5.00    0.70
  11   9   2    4.80    0.70
  11   9   2    4.30    1.00
  10 -10  -2  108.79    6.20
  10 -10  -2  101.79    6.50
  10 -10  -2   99.19    6.00
  10 -10  -2  102.89    6.00
  10 -10  -2   90.09    6.90
  10  10  -2  108.79    6.90
 -10  10   2  117.29    7.50
 -10  10   2  118.49    7.60
  -8 -10   2  381.36   23.20
  -8 -10   2  394.46   22.90
  -8 -10   2  414.76   26.20
   8 -10  -2  411.76   21.80
   8 -10  -2  394.86   23.20
   8 -10  -2  374.66   21.50
   8 -10  -2  419.06   21.60
  -8 -10   2  433.46   22.10
  -8 -10   2  353.26   25.40
   8 -10  -2  362.76   22.40
   8  10  -2  363.76   23.80
   8  10  -2  364.86   21.70
  -8  10   2  394.56   23.10
   8  10  -2  387.46   22.50
  -8  10   2  412.46   24.10
  -8  10   2  399.66   22.70
  -6 -10   2   83.79    7.50
   6 -10  -2   71.89    4.50
  -6 -10   2   82.49    4.90
  -6 -10   2   78.89    5.40
   6 -10  -2   71.39    4.60
   6 -10  -2   76.89    4.50
  -6 -10   2   64.59    5.20
   6 -10  -2   69.19    5.30
   6 -10  -2   72.49    5.80
  -6 -10   2   81.49    5.90
   6 -10  -2   68.29    4.60
   6 -10  -2   70.99    4.60
   6 -10  -2   76.59    4.70
   6  10  -2   74.99    6.30
  -6  10   2   86.89    5.60
  -6  10   2   94.39   11.50
   6  10  -2   74.19    5.30
   6  10  -2   67.39    4.40
  -6  10   2   92.99    9.60
   6  10  -2   71.19    5.80
  -4 -10   2  162.08   10.50
  -4 -10   2  156.38   10.30
  -4 -10   2  172.28   11.40
  -4 -10   2  158.78   11.50
   4  10  -2  173.98    9.70
   4  10  -2  179.68   10.40
  -4  10   2  167.88   10.70
   4  10  -2  172.08    9.60
  -4  10   2  137.99   12.90
   4  10  -2  182.08   10.90
  -4  10   2  155.78   10.00
   4  10  -2  187.78   10.20
   4  10  -2  186.28   11.70
  -4  10   2  148.69   14.20
  -4  10   2  159.68   10.20
  -2  10   2  876.41   55.69
  -2  10   2 1032.40   56.39
  -4 -10  -2  800.22   42.90
  -4  10  -2  707.53   40.30
  -4  10  -2  714.73   40.50
   6 -10   2  951.80   49.40
  -6 -10  -2  859.21   49.90
  -6 -10  -2  901.91   50.99
   6 -10   2  957.90   48.00
   6  10   2  800.42   47.60
   6  10   2  837.72   48.40
   6  10   2  935.61   50.39
   6  10   2  786.42   47.70
   6  10   2  796.42   47.30
   8 -10   2  129.29    7.50
   8 -10   2  132.19    7.20
   8 -10   2  129.19    7.00
   8 -10   2  119.09    8.90
   8 -10   2  127.69    7.20
   8 -10   2  122.99    7.10
   8 -10   2  128.19    7.60
   8 -10   2  121.89    7.40
  -8 -10  -2  102.59    9.80
  -8 -10  -2  103.49    8.60
  -8 -10  -2  108.49    7.30
   8 -10   2  128.69    7.00
   8 -10   2  128.19    7.70
  -8  10  -2  114.69    7.80
   8  10   2  120.79    7.80
  -8  10  -2  107.79    7.60
   8  10   2  127.59    7.30
  10 -10   2  135.49    7.10
  10 -10   2  127.39    7.00
  10 -10   2  116.19    8.40
 -10 -10  -2  136.59    8.10
  10 -10   2  128.49    7.10
  10 -10   2  127.29    7.30
  10 -10   2  128.89    7.30
  10  10   2  117.09    7.80
  10  10   2  124.49    7.20
  10  10   2  119.39    7.40
  10  10   2  118.29    6.90
  10  10   2  114.79    7.20
   9 -11  -2   67.59    4.10
  -9 -11   2   71.09    5.20
   9 -11  -2   76.89    4.40
   9 -11  -2   65.99    4.90
   9 -11  -2   67.69    4.20
  -9 -11   2   70.59    5.70
   9 -11  -2   70.69    4.30
  -9  11   2   74.59    5.70
   9  11  -2   64.39    4.80
  -9  11   2   73.19    5.90
   9  11  -2   60.19    4.20
  -7 -11   2  105.49    6.70
   7 -11  -2   88.19    5.70
   7 -11  -2   93.49    6.50
  -7 -11   2   99.59    8.80
   7 -11  -2   86.39    5.50
   7 -11  -2   82.79    6.90
   7 -11  -2   97.69    5.70
  -7 -11   2   87.89    8.60
   7 -11  -2   82.69    5.30
   7 -11  -2   94.09    5.50
  -7 -11   2  104.49    7.20
   7  11  -2   88.89    5.60
  -7  11   2   97.89    6.90
  -7  11   2  102.79    6.80
  -7  11   2  102.79    7.60
   7  11  -2   98.99    7.80
   7  11  -2  100.19    6.50
   7  11  -2   90.39    5.30
  -5 -11   2  275.97   16.90
   5 -11  -2  271.97   16.10
   5 -11  -2  296.17   17.00
  -5 -11   2  276.57   18.90
  -5 -11   2  292.47   18.80
   5 -11  -2  316.87   16.40
  -5 -11   2  267.27   17.60
   5 -11  -2  304.37   16.20
  -5 -11   2  265.77   16.40
  -5 -11   2  306.07   17.50
   5 -11  -2  309.67   16.40
   5  11  -2  326.87   19.30
   5  11  -2  292.47   18.00
   5  11  -2  303.07   17.50
   5  11  -2  286.97   16.20
   5  11  -2  286.07   16.30
  -5  11   2  303.87   17.40
  -5  11   2  312.17   18.00
   5  11  -2  309.47   18.40
  -5  11   2  319.07   17.20
   5  11  -2  270.77   16.40
  -5  11   2  272.57   22.40
   5  11  -2  317.77   17.10
  -5  11   2  255.27   21.30
   5  11  -2  273.37   16.30
  -3 -11   2   90.59    7.60
  -3 -11   2  104.39    7.60
  -3 -11   2  111.19    7.00
   3 -11  -2  114.79    6.50
  -3 -11   2  109.99    7.10
   3  11  -2  106.99    7.70
   3  11  -2  114.49    8.20
  -3  11   2  102.59    8.40
  -3  11   2   99.79    7.30
  -3  11   2  106.69    7.20
   3  11  -2  115.69    6.90
   3  11  -2  108.89    7.00
   3  11  -2  117.69    7.60
  -3  11   2  105.89    7.20
   3  11  -2  102.99    6.40
  -1  11   2  544.65   33.80
  -1 -11  -2  173.28   10.80
  -1 -11  -2  177.48   12.10
  -1 -11  -2  184.68   11.10
  -1 -11  -2  191.08   11.50
  -1 -11  -2  187.48   11.20
   1  11   2  181.78   13.10
   1  11   2  215.48   11.60
  -1  11  -2  186.48   11.00
  -1  11  -2  205.68   12.90
  -1  11  -2  213.78   12.00
   1  11   2  198.98   11.30
   1  11   2  196.18   10.90
  -1  11  -2  171.88   10.90
  -1  11  -2  183.98   11.20
   1  11   2  191.58   13.30
  -1  11  -2  205.28   12.90
   1  11   2  193.68   10.80
  -3 -11  -2  159.98   10.00
  -3 -11  -2  168.38   10.30
  -3 -11  -2  151.58    9.20
  -3 -11  -2  164.58   11.30
  -3 -11  -2  166.28    9.50
  -3 -11  -2  168.98   10.50
   3  11   2  164.48    9.90
  -3  11  -2  159.38    9.60
   3  11   2  159.98   10.20
   3  11   2  172.68   10.30
  -3  11  -2  162.48    9.50
  -3  11  -2  162.48   11.50
   3  11   2  167.18   11.30
   3  11   2  155.68    9.30
   3  11   2  178.68    9.60
  -5 -11  -2  149.59   10.70
   5 -11   2  153.88    9.70
  -5 -11  -2  159.08   10.30
  -5 -11  -2  160.98   11.50
   5 -11   2  147.09    8.70
   5 -11   2  153.98    8.90
   5 -11   2  151.98    8.70
   5 -11   2  152.08    9.40
   5 -11   2  157.78    8.90
  -5 -11  -2  149.69    8.80
  -5 -11  -2  149.39    9.30
   5 -11   2  152.68    9.00
   5 -11   2  155.58   10.50
   5 -11   2  165.68    9.30
   5 -11   2  148.19    9.20
   5 -11   2  164.58    8.80
   5  11   2  163.38   11.30
   5  11   2  143.59    8.80
   5  11   2  156.18    9.10
  -5  11  -2  159.28    9.20
   5  11   2  154.58    9.90
   7 -11   2   52.89    3.60
   7 -11   2   56.39    3.90
  -7 -11  -2   63.39    3.90
   7 -11   2   52.99    4.10
   7 -11   2   53.99    3.60
  -7 -11  -2   66.89    6.40
   7 -11   2   54.29    3.80
   7 -11   2   53.59    3.40
  -7 -11  -2   61.49    6.80
  -7 -11  -2   64.39    4.50
   7 -11   2   56.89    4.10
   7 -11   2   54.69    3.50
   7 -11   2   61.09    4.30
  -7 -11  -2   57.69    5.20
   7  11   2   56.39    3.70
   7  11   2   56.59    3.90
   7  11   2   55.19    4.20
  -7  11  -2   46.50    8.70
   7  11   2   52.49    3.60
   7  11   2   50.39    3.90
  -7  11  -2   59.69    4.20
   9 -11   2  187.98   10.90
   9 -11   2  202.88   11.10
  -9 -11  -2  196.38   12.60
   9 -11   2  188.78   11.00
   9 -11   2  197.88   11.30
  -9 -11  -2  208.58   12.00
   9 -11   2  196.68   11.20
   9 -11   2  197.78   10.80
  -9 -11  -2  205.78   11.30
   9  11   2  185.88   11.70
  -9  11  -2  213.88   11.90
   9  11   2  175.08   11.30
   9  11   2  185.58   11.10
  10 -12  -2   95.19    5.10
  10 -12  -2   87.49    5.50
  10 -12  -2   84.69    5.00
  10 -12  -2   87.59    5.20
  10 -12  -2   89.79    5.80
  10  12  -2   88.59    5.80
 -10  12   2   77.69    6.30
   8 -12  -2  164.38   11.70
  -8 -12   2  175.28   11.90
   8 -12  -2  189.08   11.30
   8 -12  -2  185.28   10.30
   8 -12  -2  204.08   10.60
  -8 -12   2  177.28   11.40
   8 -12  -2  191.88   10.40
   8  12  -2  175.78   10.40
   8  12  -2  179.48   12.90
  -8  12   2  177.08   11.90
   8  12  -2  199.68   11.30
  -8  12   2  189.38   11.90
  -8  12   2  164.68   12.30
   6 -12  -2  655.63   39.00
  -6 -12   2  663.33   41.60
  -6 -12   2  699.73   41.50
  -6 -12   2  702.43   39.10
   6 -12  -2  669.93   39.70
  -6 -12   2  663.03   38.80
   6  12  -2  760.82   41.90
  -6  12   2  707.33   46.50
   6  12  -2  698.93   40.80
   6  12  -2  626.64   39.70
  -6  12   2  753.92   39.40
  -6  12   2  736.13   39.70
  -6  12   2  760.92   40.30
  -4 -12   2  219.28   14.40
   4 -12  -2  248.38   13.10
  -4 -12   2  225.38   15.10
   4 -12  -2  225.08   13.20
  -4 -12   2  209.78   15.20
   4 -12  -2  228.98   13.10
   4 -12  -2  223.48   13.80
  -4 -12   2  228.18   14.10
   4  12  -2  258.47   14.10
  -4  12   2  232.68   14.60
  -4  12   2  200.58   18.40
   4  12  -2  263.67   15.10
   4  12  -2  254.87   14.40
  -4  12   2  235.28   16.10
  -4  12   2  224.98   14.30
   4  12  -2  247.48   13.50
   4  12  -2  253.27   13.40
   4  12  -2  265.57   15.40
   4  12  -2  238.68   13.30
  -4  12   2  225.78   14.20
   4  12  -2  231.88   13.20
  -2 -12   2  236.48   14.30
   2 -12  -2  251.87   13.70
   2 -12  -2  232.98   13.70
  -2 -12   2  247.68   14.80
   2  12  -2  274.27   15.60
   2  12  -2  257.37   13.90
  -2  12   2  239.18   14.70
   2  12  -2  271.27   14.00
  -2  12   2  230.28   14.50
  -2  12   2  235.98   14.90
  -2  12   2  237.78   16.70
   0  12   2 2240.08  148.49
  -2 -12  -2  292.67   17.00
  -2 -12  -2  320.27   18.90
  -2 -12  -2  296.67   17.40
  -2 -12  -2  316.27   17.60
  -2 -12  -2  328.87   18.00
  -2 -12  -2  287.07   16.70
   2 -12   2  319.77   16.80
   2  12   2  302.27   17.40
   2  12   2  298.47   19.20
   2  12   2  283.07   18.70
   2  12   2  300.07   17.10
  -2  12  -2  292.87   18.00
   2  12   2  313.37   17.90
   2  12   2  319.57   17.90
  -2  12  -2  288.07   17.00
   2  12   2  283.57   16.80
  -2  12  -2  313.87   19.40
  -4 -12  -2  665.93   37.10
   4 -12   2  681.23   36.30
   4 -12   2  670.43   35.90
   4 -12   2  666.83   36.20
  -4 -12  -2  682.53   38.50
   4 -12   2  633.14   37.40
  -4 -12  -2  668.93   37.60
   4  12   2  637.44   36.10
  -4  12  -2  663.13   38.80
   4  12   2  709.23   38.60
  -4  12  -2  588.24   39.50
  -4  12  -2  620.84   36.10
   4  12   2  637.04   35.70
   4  12   2  655.63   37.00
  -4  12  -2  640.74   36.20
  -6 -12  -2  218.08   13.10
   6 -12   2  217.08   12.90
  -6 -12  -2  221.88   12.50
  -6 -12  -2  219.38   14.10
   6 -12   2  234.68   12.50
   6 -12   2  231.28   12.70
   6 -12   2  226.38   13.00
   6 -12   2  216.78   12.30
   6 -12   2  229.68   13.40
   6 -12   2  221.98   12.40
   6 -12   2  216.98   12.30
   6 -12   2  210.38   12.40
  -6 -12  -2  211.18   14.90
   6 -12   2  228.48   14.40
  -6 -12  -2  222.28   16.00
   6  12   2  219.68   13.70
  -6  12  -2  208.08   12.90
   6  12   2  216.88   12.40
  -6  12  -2  201.18   18.10
   6  12   2  235.78   15.50
   6  12   2  214.58   12.70
  -6  12  -2  211.88   13.10
   8 -12   2   50.69    3.10
   8 -12   2   50.79    3.50
  -8 -12  -2   45.80    4.60
   8 -12   2   51.59    3.40
  -8 -12  -2   50.89    4.10
   8 -12   2   57.79    3.70
  -8 -12  -2   48.40    3.50
   8 -12   2   52.09    3.20
   8 -12   2   48.00    3.30
   8 -12   2   53.89    3.80
   8 -12   2   48.40    4.90
   8  12   2   45.80    3.50
   8  12   2   47.90    4.90
  -8  12  -2   51.99    3.90
  -8  12  -2   38.00    8.90
   8  12   2   53.79    3.40
   8  12   2   53.29    3.90
  10 -12   2   77.99    4.50
  10 -12   2   74.19    5.60
  10 -12   2   78.59    4.60
  10 -12   2   78.39    4.40
  10 -12   2   81.59    4.50
  10  12   2   72.09    4.50
  10  12   2   73.19    5.10
  10  12   2   76.59    4.60
  -9 -13   2   97.89    7.10
   9 -13  -2  100.59    6.90
   9 -13  -2   94.89    6.40
   9 -13  -2   95.89    5.80
   9 -13  -2  102.69    5.80
   9 -13  -2  106.09    6.00
   9  13  -2  103.49    6.60
   9  13  -2   94.19    5.80
  -9  13   2  107.69    7.40
   7 -13  -2  280.17   16.60
   7 -13  -2  265.87   17.20
   7 -13  -2  297.17   15.90
  -7 -13   2  275.07   17.20
  -7 -13   2  273.67   19.10
  -7 -13   2  257.07   15.90
   7 -13  -2  301.87   15.70
   7 -13  -2  302.77   15.60
  -7  13   2  252.57   19.50
  -7  13   2  261.37   17.10
   7  13  -2  283.87   15.50
   7  13  -2  290.37   18.40
  -7  13   2  277.17   17.70
   7  13  -2  314.77   16.90
  -7  13   2  278.17   17.30
   5 -13  -2  388.06   22.80
   5 -13  -2  378.86   22.30
  -5 -13   2  405.56   23.90
  -5 -13   2  418.06   24.80
   5 -13  -2  421.26   22.00
  -5 -13   2  356.86   22.10
   5 -13  -2  385.66   22.10
  -5 -13   2  385.16   22.50
   5 -13  -2  433.96   21.90
  -5 -13   2  423.76   23.40
   5  13  -2  373.16   22.20
  -5  13   2  435.66   26.10
   5  13  -2  427.56   23.10
   5  13  -2  384.46   22.10
   5  13  -2  422.26   24.60
   5  13  -2  380.46   25.10
   5  13  -2  377.26   22.00
   5  13  -2  415.06   23.60
  -5  13   2  356.26   23.10
   5  13  -2  386.36   22.10
   5  13  -2  392.16   24.20
  -5  13   2  418.46   23.60
  -5  13   2  435.26   24.00
  -3 -13   2  665.83   37.10
  -3  13   2  681.73   37.60
  -3  13   2  674.33   40.00
   3  13  -2  722.53   39.20
   3  13  -2  604.04   36.40
   3  13  -2  720.23   37.50
  -3  13   2  655.13   37.30
   3  13  -2  612.64   36.40
  -3  13   2  618.24   37.50
   3  13  -2  702.93   38.20
  -1  13   2  828.72   49.90
  -1  13   2  833.62   48.80
   1  13  -2  860.11   48.10
  -1 -13  -2  291.57   19.20
  -1 -13  -2  302.57   18.00
  -1 -13  -2  328.97   18.60
  -1 -13  -2  329.67   18.10
   1  13   2  312.47   19.90
   1  13   2  342.97   18.70
  -1  13  -2  319.17   17.80
   1  13   2  342.97   18.90
  -1  13  -2  321.87   19.10
  -1  13  -2  307.77   18.20
   1  13   2  313.27   17.80
   1  13   2  290.07   17.60
  -1  13  -2  325.47   17.90
   1  13   2  336.17   18.30
   1  13   2  301.17   20.20
   1  13   2  327.77   20.80
  -1  13  -2  289.57   19.60
  -3 -13  -2  233.28   13.70
   3 -13   2  258.57   13.90
  -3 -13  -2  248.88   14.40
   3 -13   2  229.18   13.20
  -3 -13  -2  248.08   15.80
   3 -13   2  216.78   13.20
   3 -13   2  252.17   15.10
  -3 -13  -2  236.08   13.30
   3 -13   2  218.28   13.40
  -3 -13  -2  264.27   15.00
   3 -13   2  243.48   13.70
  -3 -13  -2  235.58   14.30
   3  13   2  220.48   13.40
   3  13   2  238.48   13.50
   3  13   2  249.68   15.90
   3  13   2  258.37   14.70
  -3  13  -2  233.18   13.70
   3  13   2  244.78   14.20
  -3  13  -2  259.37   16.70
  -3  13  -2  210.88   13.80
   3  13   2  224.28   13.30
   3  13   2  257.97   13.80
   3  13   2  238.98   14.70
   5 -13   2  137.69    8.40
   5 -13   2  128.59    8.40
   5 -13   2  139.49    8.20
   5 -13   2  141.39    8.60
  -5 -13  -2  152.38    8.10
   5 -13   2  121.09    7.90
   5 -13   2  145.79    8.40
   5 -13   2  133.39    7.90
   5 -13   2  130.89    8.10
   5 -13   2  131.29    9.70
   5 -13   2  131.79    7.90
  -5 -13  -2  149.49   11.20
  -5 -13  -2  153.78    8.70
   5 -13   2  147.49    8.00
  -5 -13  -2  155.58    9.70
   5 -13   2  140.09    8.80
  -5  13  -2  158.68   11.80
  -5  13  -2  123.49   12.10
   5  13   2  122.69    7.70
   5  13   2  130.39   10.50
  -5  13  -2  147.89    8.50
   5  13   2  125.99    9.10
   5  13   2  134.39    8.40
  -5  13  -2  145.39    8.40
  -5  13  -2  144.39    8.60
  -7 -13  -2  387.06   22.00
   7 -13   2  396.16   21.50
   7 -13   2  366.66   23.20
  -7 -13  -2  387.96   21.40
   7 -13   2  393.06   21.70
   7 -13   2  418.36   21.80
  -7 -13  -2  375.76   22.90
   7 -13   2  387.26   21.00
   7 -13   2  371.56   21.10
   7 -13   2  362.66   21.20
  -7 -13  -2  383.36   24.50
   7  13   2  377.46   21.50
   7  13   2  384.86   21.30
  -7  13  -2  358.96   25.40
  -7  13  -2  355.66   21.50
   7  13   2  410.06   21.90
   9 -13   2  160.98    8.90
   9 -13   2  148.69    9.10
   9 -13   2  150.78    8.70
  -9 -13  -2  149.39    9.00
  -9 -13  -2  138.09    9.50
   9 -13   2  163.28    8.70
   9 -13   2  154.68   10.30
   9 -13   2  159.38    8.80
   9  13   2  159.08    9.00
   9  13   2  169.18    9.60
  10 -14  -2   32.00    2.10
  10 -14  -2   28.90    2.30
  10 -14  -2   31.20    1.90
  10 -14  -2   29.50    1.90
  10  14  -2   32.00    2.50
 -10  14   2   27.00    3.10
   8 -14  -2   32.60    2.20
   8 -14  -2   32.70    3.30
   8 -14  -2   32.90    2.50
  -8 -14   2   27.90    3.30
  -8 -14   2   30.20    2.80
   8 -14  -2   27.50    2.90
   8 -14  -2   31.90    2.20
   8  14  -2   32.40    2.90
  -8  14   2   28.40    3.50
   8  14  -2   31.60    2.30
   6 -14  -2    6.90    1.00
   6 -14  -2    7.30    1.20
   6 -14  -2    7.30    0.60
  -6 -14   2    8.40    2.10
   6 -14  -2    7.30    0.70
   6 -14  -2    6.60    1.00
  -6 -14   2    5.90    2.30
   6 -14  -2    8.70    1.40
   6 -14  -2    8.70    1.80
   6 -14  -2    8.10    1.80
   6 -14  -2    6.20    0.80
   6  14  -2    7.70    1.50
  -6  14   2    3.80    2.30
   6  14  -2    7.10    0.90
  -6  14   2    5.80    6.20
  -6  14   2    7.60    2.10
  -6  14   2   13.40    4.50
  -6  14   2    9.40    2.50
   6  14  -2    7.70    2.30
   6  14  -2    7.50    2.40
   6  14  -2    4.20    2.10
   4 -14  -2  272.07   15.50
  -4 -14   2  275.97   16.00
   4 -14  -2  278.67   15.80
  -4 -14   2  283.37   17.10
   4 -14  -2  291.07   16.50
  -4 -14   2  286.27   16.70
   4 -14  -2  259.37   15.50
  -4 -14   2  280.77   17.80
   4 -14  -2  253.17   15.70
   4  14  -2  285.97   15.80
   4  14  -2  305.97   18.90
   4  14  -2  295.67   17.90
   4  14  -2  309.97   16.70
   4  14  -2  306.27   17.20
   4  14  -2  273.37   15.70
  -4  14   2  274.07   19.70
   4  14  -2  293.67   18.10
   4  14  -2  284.77   16.00
  -4  14   2  274.97   17.10
  -4  14   2  262.47   16.70
  -4  14   2  279.67   17.50
   4  14  -2  282.77   15.90
  -4  14   2  268.47   17.00
  -2 -14   2  116.99    7.30
  -2 -14   2  112.29    6.60
  -2 -14   2  107.49    7.00
   2 -14  -2  108.09    6.80
   2 -14  -2   99.09    6.20
  -2 -14   2   98.99    7.20
   2  14  -2  107.99    7.80
  -2  14   2  120.39   10.20
  -2  14   2  123.89    7.90
   2  14  -2  100.79    6.60
   2  14  -2  108.89    6.70
   2  14  -2  104.49    8.60
   2  14  -2  107.99    8.20
  -2  14   2  116.39    7.60
   2  14  -2  121.79    7.40
   2  14  -2  116.19    7.20
  -2  14   2  116.29   11.40
   0 -14  -2  122.59    8.00
   0 -14   2  125.19    7.60
   0 -14  -2  122.59    7.70
   0 -14   2  121.89    7.50
   0 -14  -2  125.19    7.50
   0  14   2  125.79    7.70
   0  14  -2  132.19    7.90
   0  14   2  120.39   10.80
   0  14  -2  121.99    7.50
   0  14   2  115.59    7.50
   0  14   2  114.19   10.20
   0  14  -2  138.19    9.00
   0  14  -2  116.79    7.40
   0  14  -2  131.49    7.90
   0  14   2  136.69    8.60
   0  14   2  136.69    9.90
   0  14   2  132.89    8.40
   0  14   2  132.49    8.00
   0  14  -2  125.09    8.20
   0  14  -2  115.89    9.30
  -2 -14  -2    5.10    1.20
   2 -14   2    2.90    0.60
  -2 -14  -2    4.50    1.80
   2 -14   2    3.20    0.70
  -2 -14  -2    3.40    0.60
   2 -14   2    5.60    1.00
   2 -14   2    4.70    0.70
  -2 -14  -2    4.90    1.50
   2 -14   2    4.50    0.60
  -2 -14  -2    3.40    1.00
   2  14   2    3.30    0.80
   2  14   2    4.40    0.80
   2  14   2    4.70    1.20
  -2  14  -2    6.60    1.10
   2  14   2    3.90    1.40
  -2  14  -2    5.50    1.20
  -2  14  -2    9.80    3.80
   2  14   2    3.00    0.90
   2  14   2    4.40    1.30
   4 -14   2  135.29    8.20
   4 -14   2  153.38    8.90
   4 -14   2  134.19    8.30
  -4 -14  -2  147.59   10.30
   4 -14   2  158.38    8.90
  -4 -14  -2  128.19    8.50
   4 -14   2  158.78    9.10
   4 -14   2  140.89    8.20
   4 -14   2  140.19    8.40
   4 -14   2  157.98   10.30
  -4 -14  -2  146.79    8.40
  -4 -14  -2  145.89    8.80
  -4 -14  -2  151.98    9.70
   4 -14   2  142.79    8.60
   4  14   2  151.08    8.30
   4  14   2  146.19    8.80
  -4  14  -2  134.79    8.70
   4  14   2  137.49    8.10
   4  14   2  161.08   11.30
   4  14   2  157.68    9.90
  -4  14  -2  147.49   11.90
  -4  14  -2  126.89    8.90
   6 -14   2  161.88   10.40
   6 -14   2  175.68   10.30
  -6 -14  -2  178.78   12.50
   6 -14   2  174.68    9.60
  -6 -14  -2  178.98   10.40
  -6 -14  -2  175.28    9.80
  -6 -14  -2  151.08   12.90
   6 -14   2  171.18    9.50
   6 -14   2  167.38   11.60
  -6 -14  -2  187.18   11.50
   6 -14   2  162.58    9.60
   6 -14   2  166.48    9.70
   6 -14   2  175.38   10.00
   6  14   2  154.28   10.20
   6  14   2  173.48   12.80
  -6  14  -2  152.58   13.40
  -6  14  -2  157.38   10.00
   6  14   2  159.48    9.60
  -6  14  -2  169.58   10.40
   8 -14   2   26.30    2.10
  -8 -14  -2   26.80    2.10
   8 -14   2   23.30    1.90
  -8 -14  -2   24.90    2.60
   8 -14   2   23.20    2.00
   8 -14   2   21.60    2.20
   8 -14   2   22.10    3.20
   8 -14   2   23.90    1.70
  -8 -14  -2   22.70    3.00
   8 -14   2   22.30    1.70
   8  14   2   24.70    2.40
   8  14   2   22.50    2.00
  -8  14  -2   24.30    2.60
   8  14   2   24.70    2.00
   8  14   2   22.80    3.10
  10 -14   2  101.69    6.00
  10 -14   2  108.49    6.90
  10 -14   2  110.19    5.90
  10 -14   2  110.29    5.90
  10  14   2  101.49    6.00
  10  14   2   98.39    5.90
   9 -15  -2   84.99    4.60
   9 -15  -2   82.79    4.80
   9 -15  -2   83.29    4.60
   9 -15  -2   74.99    5.10
  -9  15   2   74.49    5.90
   9  15  -2   83.29    5.30
  -9  15   2   74.39    5.80
  -9  15   2   63.69    5.80
   7 -15  -2  129.99    7.00
  -7 -15   2  113.69    7.50
  -7 -15   2  106.09    9.60
   7 -15  -2  117.09    7.80
   7 -15  -2  127.89    8.40
  -7 -15   2  114.49    8.30
   7 -15  -2  120.09    7.20
   7  15  -2  122.59    8.00
  -7  15   2  119.19    9.00
  -7  15   2  113.89    8.40
   7  15  -2  127.19    6.80
   7  15  -2  121.79    9.50
  -7  15   2  125.39    8.80
  -7  15   2  117.79    8.60
  -5 -15   2  399.76   23.60
   5 -15  -2  419.96   23.10
   5 -15  -2  454.65   23.60
   5 -15  -2  441.46   23.20
  -5 -15   2  406.76   25.10
  -5 -15   2  437.86   24.60
   5 -15  -2  447.76   23.40
   5 -15  -2  422.76   24.10
   5 -15  -2  419.76   24.70
  -5 -15   2  392.06   25.70
   5  15  -2  448.76   24.40
  -5  15   2  402.76   24.40
   5  15  -2  429.96   23.30
  -5  15   2  373.16   24.50
  -5  15   2  448.96   25.40
   5  15  -2  394.46   26.60
  -5  15   2  438.36   28.40
   5  15  -2  431.16   26.00
  -5  15   2  424.76   24.90
   5  15  -2  418.16   23.50
   5  15  -2  400.76   23.30
  -5  15   2  408.66   24.90
  -3 -15   2  184.58   11.60
   3 -15  -2  208.38   11.20
   3 -15  -2  206.48   10.60
   3 -15  -2  185.08   10.70
  -3 -15   2  178.08   12.20
   3 -15  -2  178.98   10.80
   3 -15  -2  204.38   11.40
  -3 -15   2  187.98   11.00
   3 -15  -2  190.38   11.50
   3 -15  -2  183.58   10.90
  -3 -15   2  173.78   10.80
   3 -15  -2  193.48   10.70
  -3 -15   2  184.98   11.90
  -3  15   2  181.88   12.30
   3  15  -2  179.98   10.90
   3  15  -2  197.18   13.80
  -3  15   2  176.08   12.10
   3  15  -2  208.08   13.00
  -3  15   2  180.48   12.00
   3  15  -2  206.78   12.20
   3  15  -2  205.68   11.80
  -3  15   2  200.48   11.90
   3  15  -2  200.68   13.20
   3  15  -2  186.18   11.00
   3  15  -2  196.28   11.20
  -3  15   2  189.88   15.00
  -1  15   2  929.51   52.49
  -1  15   2 1033.00   56.29
  -1  15   2  840.32   56.29
   1  15  -2  973.30   54.29
   1 -15   2  426.86   22.10
  -1 -15  -2  351.96   22.10
   1 -15   2  391.76   21.80
  -1 -15  -2  403.46   23.10
  -1 -15  -2  413.66   22.60
  -1 -15  -2  362.36   21.80
   1 -15   2  393.86   21.80
   1  15   2  405.06   22.10
  -1  15  -2  397.76   22.90
  -1  15  -2  400.06   22.40
   1  15   2  430.56   23.40
  -1  15  -2  367.56   22.10
   1  15   2  389.46   22.00
   1  15   2  405.56   22.40
  -1  15  -2  359.06   22.10
  -1  15  -2  425.46   24.80
   1  15   2  412.36   23.50
   1  15   2  427.86   22.80
  -1  15  -2  407.46   23.80
   1  15   2  364.36   21.90
   1  15   2  381.36   22.10
   1  15   2  410.76   25.10
   1  15   2  410.86   24.90
  -3 -15  -2  482.15   28.40
   3 -15   2  539.55   28.30
  -3 -15  -2  495.45   28.10
  -3 -15  -2  528.25   29.10
  -3 -15  -2  499.55   29.20
  -3 -15  -2  519.95   28.00
  -3 -15  -2  551.04   30.00
   3 -15   2  529.25   28.60
   3 -15   2  500.95   28.40
  -3 -15  -2  503.45   31.00
   3  15   2  462.25   27.90
   3  15   2  544.95   28.60
   3  15   2  504.55   28.00
  -3  15  -2  500.45   28.40
  -3  15  -2  481.95   31.40
   3  15   2  492.05   28.10
   3  15   2  533.05   29.70
   3  15   2  500.75   29.60
   3  15   2  518.55   29.10
  -3  15  -2  467.25   28.60
   3  15   2  550.64   31.30
  -3  15  -2  514.45   29.90
  -5 -15  -2  377.66   23.40
   5 -15   2  452.45   23.90
   5 -15   2  437.26   23.60
  -5 -15  -2  407.06   23.70
   5 -15   2  451.45   23.60
   5 -15   2  395.96   23.40
  -5 -15  -2  381.46   26.60
  -5 -15  -2  449.56   24.70
  -5 -15  -2  442.06   25.80
  -5 -15  -2  419.26   23.10
   5 -15   2  416.86   25.10
   5  15   2  439.16   23.70
   5  15   2  411.46   24.70
  -5  15  -2  373.56   23.80
  -5  15  -2  380.16   23.30
   5  15   2  460.85   26.80
   5  15   2  406.16   22.80
   7 -15   2  400.56   26.00
  -7 -15  -2  442.86   25.90
   7 -15   2  434.46   24.70
   7 -15   2  421.96   24.20
  -7 -15  -2  448.36   24.40
   7 -15   2  477.55   24.70
  -7 -15  -2  422.36   25.00
   7  15   2  462.65   24.80
  -7  15  -2  428.46   25.20
   7  15   2  450.75   24.50
   9 -15   2   83.19    4.60
   9 -15   2   81.59    4.40
   9 -15   2   80.09    4.50
   9 -15   2   74.09    4.80
   9 -15   2   70.69    5.70
   9  15   2   73.19    4.60
   9  15   2   75.09    4.60
   8 -16  -2   32.20    2.10
   8 -16  -2   30.50    2.90
   8 -16  -2   32.10    2.10
  -8 -16   2   31.20    3.20
   8 -16  -2   34.80    2.40
  -8 -16   2   30.80    2.70
   8  16  -2   30.00    2.80
  -8  16   2   30.10    3.40
  -8  16   2   27.80    3.90
  -8  16   2   32.80    4.00
   8  16  -2   31.40    2.20
  -8  16   2   29.90    3.50
   6 -16  -2   10.80    1.20
   6 -16  -2   10.30    1.20
  -6 -16   2    7.70    1.40
   6 -16  -2   12.60    1.50
  -6 -16   2    8.60    2.00
   6 -16  -2   11.50    2.20
  -6 -16   2    9.20    1.80
   6 -16  -2    9.30    1.40
  -6 -16   2   14.50    3.50
  -6  16   2   10.60    4.10
  -6  16   2   15.30    3.10
   6  16  -2   11.70    1.20
  -6  16   2    7.70    2.60
  -6  16   2    9.30    2.40
   6  16  -2   11.80    2.00
  -6  16   2   10.20    2.40
  -6  16   2   12.20    2.60
   6  16  -2   10.90    2.80
   6  16  -2   10.50    2.10
   6  16  -2   10.20    3.10
  -6  16   2    4.10    5.50
  -4 -16   2   43.80    4.00
  -4 -16   2   40.20    3.60
  -4 -16   2   37.90    2.60
  -4 -16   2   42.00    2.90
   4 -16  -2   34.70    2.70
   4 -16  -2   36.90    2.70
  -4 -16   2   40.80    4.20
   4 -16  -2   32.80    3.10
   4 -16  -2   32.00    2.60
   4 -16  -2   34.70    3.40
   4 -16  -2   38.00    2.30
   4 -16  -2   36.00    2.50
   4 -16  -2   39.20    2.50
  -4  16   2   39.60    6.30
  -4  16   2   41.50    4.00
   4  16  -2   40.60    3.80
  -4  16   2   40.50    4.20
   4  16  -2   41.30    4.40
   4  16  -2   33.20    2.80
   4  16  -2   37.20    2.70
   4  16  -2   34.40    4.70
   4  16  -2   33.80    3.30
  -4  16   2   39.80    4.00
   4  16  -2   34.90    2.80
  -4  16   2   41.30    4.10
  -4  16   2   35.00    4.00
   4  16  -2   36.40    2.90
   4  16  -2   35.60    4.30
  -4  16   2   37.10    8.50
   2 -16  -2  221.48   12.80
   2 -16  -2  216.48   13.30
   2 -16  -2  240.78   13.40
  -2 -16   2  224.28   12.90
   2 -16  -2  237.98   13.30
   2 -16  -2  215.88   12.60
  -2 -16   2  214.58   13.40
   2 -16  -2  212.38   12.60
  -2 -16   2  210.18   13.60
  -2 -16   2  212.38   12.80
   2  16  -2  225.28   13.00
  -2  16   2  240.78   13.50
   2  16  -2  252.87   13.90
   2  16  -2  254.97   14.90
  -2  16   2  206.38   13.40
   2  16  -2  233.28   13.10
  -2  16   2  217.18   17.70
   2  16  -2  246.08   16.00
  -2  16   2  228.28   13.80
  -2  16   2  251.57   17.30
   2  16  -2  246.98   13.30
  -2  16   2  219.88   14.00
   2  16  -2  245.38   14.10
   2  16  -2  219.88   13.00
   2  16  -2  244.58   15.30
  -2  16   2  204.28   13.70
   0 -16  -2  120.19    7.20
   0 -16  -2  122.69    8.00
   0 -16   2  135.79    7.30
   0 -16   2  131.79    7.50
   0 -16   2  118.19    7.20
   0 -16   2  125.39    7.40
   0 -16   2  138.39    7.90
   0 -16  -2  121.79    7.90
   0 -16   2  128.39    7.70
   0  16  -2  124.59    8.50
   0  16   2  122.69    7.60
   0  16  -2  131.29    9.30
   0  16   2  117.09    7.70
   0  16   2  125.79   10.20
   0  16   2  136.49    8.30
   0  16   2  113.19    7.70
   0  16  -2  128.69    8.10
   0  16  -2  128.59    7.60
   0  16   2  128.49   10.70
   0  16   2  143.59   11.60
   0  16  -2  132.69    8.10
   0  16   2  114.19    7.50
   0  16  -2  127.39    7.60
   0  16   2  131.59    8.70
   0  16  -2  111.79    9.60
   2 -16   2  235.48   12.70
   2 -16   2  220.08   13.10
  -2 -16  -2  234.98   14.40
   2 -16   2  216.58   12.70
   2 -16   2  239.38   13.10
   2 -16   2  227.58   13.10
   2 -16   2  215.28   12.90
  -2 -16  -2  219.38   12.90
   2 -16   2  222.48   12.70
  -2 -16  -2  203.48   13.30
  -2 -16  -2  221.28   13.80
   2 -16   2  224.28   12.80
   2 -16   2  236.28   13.20
   2 -16   2  240.88   12.60
   2 -16   2  213.38   13.10
  -2  16  -2  231.58   14.90
   2  16   2  246.78   16.10
   2  16   2  230.98   13.40
  -2  16  -2  238.98   13.20
   2  16   2  244.08   16.00
  -2  16  -2  238.98   13.30
   2  16   2  223.68   13.10
   2  16   2  233.48   14.50
  -2  16  -2  248.98   16.20
   2  16   2  231.48   14.50
   2  16   2  225.38   12.90
  -2  16  -2  210.78   13.60
  -2  16  -2  228.98   13.40
   2  16   2  233.38   13.00
   2  16   2  207.58   12.80
   2  16   2  239.68   13.90
   4 -16   2   22.80    2.20
  -4 -16  -2   19.00    2.50
   4 -16   2   19.30    2.10
   4 -16   2   19.80    1.70
   4 -16   2   21.00    1.90
  -4 -16  -2   18.10    1.90
   4 -16   2   24.70    2.40
   4 -16   2   22.70    1.70
  -4 -16  -2   20.90    3.20
   4 -16   2   22.10    2.00
   4 -16   2   24.30    3.30
  -4 -16  -2   20.20    2.10
  -4  16  -2   23.20    2.10
   4  16   2   23.40    3.80
  -4  16  -2   22.20    3.10
   4  16   2   19.60    1.70
   4  16   2   21.30    2.70
   4  16   2   19.70    1.60
   4  16   2   24.10    2.20
  -4  16  -2   16.60    2.30
  -4  16  -2   22.90    5.30
  -4  16  -2   18.50    2.20
   6 -16   2  127.49    7.20
  -6 -16  -2  116.09    8.40
   6 -16   2  126.09    7.60
   6 -16   2  110.29    7.60
  -6 -16  -2  127.49    9.80
   6 -16   2  137.29    9.20
   6 -16   2  132.89    7.00
  -6 -16  -2  118.79    7.80
  -6 -16  -2  117.59    7.10
   6 -16   2  130.09    7.00
  -6  16  -2  113.39    7.20
  -6  16  -2  107.69    8.90
   6  16   2  112.59    7.00
  -6  16  -2   98.89   10.80
  -6  16  -2  112.89    7.90
   6  16   2  120.89   10.10
  -8 -16  -2    4.50    0.90
  -8 -16  -2    7.30    2.10
   8 -16   2    6.00    0.80
   8 -16   2    6.60    1.20
   8 -16   2    6.00    0.90
   8 -16   2    9.10    2.20
   8 -16   2    6.30    1.00
   8  16   2    6.30    1.20
   8  16   2    6.40    1.00
   8  16   2    6.70    1.00
   9 -17  -2   15.70    1.70
  -9 -17   2   20.80    1.70
   9 -17  -2   18.60    1.40
   9 -17  -2   18.40    1.30
   9 -17  -2   16.90    1.30
  -9  17   2   16.20    2.20
  -9  17   2   16.40    2.00
   9  17  -2   18.50    1.80
   7 -17  -2   47.30    2.90
   7 -17  -2   45.70    3.70
   7 -17  -2   45.90    3.10
  -7  17   2   35.60    4.30
  -7  17   2   33.90    7.40
   7  17  -2   47.70    2.60
  -7  17   2   42.40    4.30
   5 -17  -2  392.36   21.40
   5 -17  -2  386.16   20.90
   5 -17  -2  347.57   20.60
  -5 -17   2  367.96   22.90
  -5 -17   2  391.56   21.00
   5 -17  -2  371.56   20.40
   5 -17  -2  383.26   20.50
  -5 -17   2  384.66   21.90
  -5 -17   2  378.16   22.60
   5 -17  -2  370.56   20.50
   5  17  -2  369.86   23.50
  -5  17   2  341.27   25.70
  -5  17   2  376.36   22.30
  -5  17   2  326.27   21.50
   5  17  -2  373.16   20.60
   5  17  -2  374.56   20.70
  -5  17   2  358.46   22.40
   5  17  -2  375.86   20.70
   5  17  -2  337.47   24.10
   5  17  -2  381.36   21.80
  -5  17   2  389.06   22.30
  -3 -17   2  261.57   15.80
  -3 -17   2  251.67   14.60
   3 -17  -2  252.67   14.60
  -3 -17   2  253.97   15.30
   3 -17  -2  254.17   14.40
   3 -17  -2  272.27   14.90
   3 -17  -2  243.88   14.30
  -3 -17   2  235.68   15.30
  -3 -17   2  264.57   14.70
   3 -17  -2  227.78   14.50
   3 -17  -2  280.37   15.20
  -3  17   2  263.17   15.70
  -3  17   2  259.57   15.30
   3  17  -2  274.97   15.00
  -3  17   2  265.87   16.20
   3  17  -2  254.47   14.70
   3  17  -2  277.27   15.70
   3  17  -2  262.77   14.70
  -3  17   2  277.77   19.50
  -3  17   2  230.48   15.50
   3  17  -2  291.17   17.20
   3  17  -2  277.37   17.40
   3  17  -2  264.77   17.90
  -3  17   2  235.48   15.70
   3  17  -2  268.07   16.10
  -3  17   2  238.38   15.20
   1 -17  -2  587.14   36.00
  -1 -17   2  657.63   36.30
  -1 -17   2  649.14   37.00
  -1 -17   2  628.44   36.60
   1 -17  -2  588.84   36.20
  -1  17   2  712.13   36.70
  -1  17   2  653.63   41.70
  -1  17   2  746.23   38.50
   1  17  -2  677.23   38.90
  -1  17   2  696.73   40.40
  -1  17   2  714.73   37.40
  -1  17   2  711.63   41.00
  -1  17   2  636.14   36.50
   1  17  -2  663.23   38.00
   1  17  -2  596.54   36.40
   1  17  -2  651.63   37.30
   1  17  -2  617.84   36.40
   1  17  -2  681.73   39.50
  -1  17   2  690.23   36.90
  -1  17   2  709.13   37.90
   1 -17   2  297.67   18.60
  -1 -17  -2  326.37   19.30
   1 -17   2  319.47   18.50
  -1 -17  -2  309.27   19.60
   1 -17   2  334.77   18.70
   1 -17   2  332.77   18.70
   1  17   2  314.37   18.70
  -1  17  -2  337.27   21.60
  -1  17  -2  333.37   19.30
   1  17   2  347.27   20.20
   1  17   2  341.67   18.70
  -1  17  -2  325.07   19.70
   1  17   2  324.77   21.70
  -1  17  -2  340.27   18.80
  -1  17  -2  338.17   18.80
  -1  17  -2  320.77   19.20
   1  17   2  369.76   19.70
   1  17   2  346.57   21.80
   1  17   2  343.17   19.10
   1  17   2  367.96   20.60
  -1  17  -2  324.27   20.60
   1  17   2  310.77   18.50
   1  17   2  349.77   18.80
  -3 -17  -2  103.49    7.70
   3 -17   2   88.69    5.60
   3 -17   2   84.09    5.60
  -3 -17  -2   98.09    6.60
   3 -17   2   94.29    6.00
  -3 -17  -2  104.49    7.10
   3 -17   2   98.99    6.20
  -3 -17  -2   98.79    5.90
   3 -17   2   85.19    6.10
   3 -17   2   88.89    6.10
  -3  17  -2  100.59    7.90
  -3  17  -2  112.39    9.40
  -3  17  -2  100.29    6.30
  -3  17  -2   99.09    6.30
  -3  17  -2   94.49    6.20
   3  17   2   95.99    5.80
   3  17   2  109.19    9.00
   3  17   2   91.89    5.90
   3  17   2  100.29    5.80
   3  17   2   94.19    7.40
  -3  17  -2   96.09    6.60
   3  17   2  101.79    6.40
  -5 -17  -2  147.79    9.00
  -5 -17  -2  141.09    8.70
   5 -17   2  162.18    9.10
   5 -17   2  153.08    8.60
  -5 -17  -2  154.78   10.00
   5 -17   2  152.68    8.80
   5 -17   2  156.78    9.20
   5 -17   2  144.49    9.20
   5 -17   2  157.88    9.20
   5 -17   2  154.78    8.60
  -5 -17  -2  141.79   11.00
   5  17   2  158.78    9.30
   5  17   2  146.99    8.70
  -5  17  -2  145.19   12.90
   5  17   2  157.68    8.50
  -5  17  -2  132.99    9.30
   5  17   2  141.19   11.70
   7 -17   2  118.69    7.70
  -7 -17  -2  127.29    7.40
   7 -17   2  137.19    7.80
   7 -17   2  130.39    7.50
  -7 -17  -2  131.39    8.70
   7 -17   2  125.79    7.30
   7 -17   2  128.69    7.30
  -7  17  -2  130.69    8.10
   7  17   2  117.99    7.50
   7  17   2  131.99    7.60
   7  17   2  125.19    7.80
   9 -17   2  269.87   14.30
   9 -17   2  240.18   14.40
   9 -17   2  259.27   14.10
   9 -17   2  269.47   14.20
   9  17   2  253.87   14.30
   8 -18  -2  122.89    6.60
   8 -18  -2  108.59    6.90
   8 -18  -2  123.19    6.50
   8 -18  -2  114.19    6.50
  -8 -18   2  116.09    6.90
  -8  18   2  114.69    7.30
   8  18  -2  108.49    6.50
  -8  18   2  105.59    7.50
  -8  18   2  104.49    7.20
   6 -18  -2   54.69    3.20
   6 -18  -2   52.09    3.20
   6 -18  -2   55.59    3.60
   6 -18  -2   54.69    3.50
  -6 -18   2   50.09    3.70
   6 -18  -2   54.99    4.10
  -6 -18   2   48.10    4.30
  -6 -18   2   46.50    3.40
   6  18  -2   56.99    3.30
  -6  18   2   38.40    7.60
  -6  18   2   50.49    4.60
  -6  18   2   45.40    4.50
  -6  18   2   43.90    4.60
  -6  18   2   44.10    4.40
   6  18  -2   54.39    4.30
  -4 -18   2   95.79    7.00
   4 -18  -2   87.99    5.60
   4 -18  -2   96.29    5.90
  -4 -18   2  105.19    6.00
  -4 -18   2   96.29    6.90
   4 -18  -2   90.59    5.50
   4 -18  -2   96.79    5.50
  -4 -18   2   93.39    5.70
   4 -18  -2   93.69    6.40
   4 -18  -2   95.89    5.40
  -4 -18   2  101.49    6.70
   4 -18  -2   92.09    5.80
   4 -18  -2   90.89    5.70
   4  18  -2   91.89    5.80
  -4  18   2   91.09   11.00
   4  18  -2   93.29    6.70
   4  18  -2   88.99    5.80
   4  18  -2   91.09    7.80
   4  18  -2   92.39    6.00
   4  18  -2   95.69    5.90
  -4  18   2   91.99    6.60
  -4  18   2   97.49    7.10
   4  18  -2   86.99    7.10
  -4  18   2   97.49   10.20
  -4  18   2   89.19    6.90
   4  18  -2   87.99    8.00
  -4  18   2   98.79    7.00
  -4  18   2   89.59    7.20
  -2 -18   2  141.29    7.60
  -2 -18   2  130.69    7.60
   2 -18  -2  114.59    7.40
   2 -18  -2  122.69    7.30
  -2 -18   2  118.89    8.00
   2 -18  -2  114.89    7.30
  -2 -18   2  139.09    8.60
   2 -18  -2  125.69    8.00
   2 -18  -2  117.29    7.50
  -2 -18   2  132.09    7.60
   2 -18  -2  113.49    7.30
  -2  18   2  145.29   12.40
  -2  18   2  115.19   12.40
  -2  18   2  137.19    8.20
  -2  18   2  148.09    8.80
   2  18  -2  129.19    7.90
   2  18  -2  120.09    8.70
  -2  18   2  142.99   11.80
   2  18  -2  126.49   10.40
   2  18  -2  125.29    7.80
   2  18  -2  118.09    7.70
  -2  18   2  132.89    9.10
  -2  18   2  131.19    8.10
  -2  18   2  139.99    9.70
   2  18  -2  131.09   10.00
   2  18  -2  114.99    9.20
  -2  18   2  141.59    8.40
   2  18  -2  130.19    8.50
   2  18  -2  128.09    7.70
   0 -18   2  186.48   11.00
   0 -18  -2  175.88   10.90
   0 -18  -2  203.18   11.10
   0 -18   2  173.98   11.00
   0 -18   2  197.58   11.70
   0 -18   2  185.48   11.30
   0  18   2  209.18   15.90
   0  18  -2  213.58   12.20
   0  18  -2  202.88   12.70
   0  18  -2  221.78   13.90
   0  18  -2  203.08   11.30
   0  18   2  191.88   12.20
   0  18  -2  210.48   12.20
   0  18   2  196.38   14.60
   0  18   2  180.38   12.60
   0  18   2  189.58   11.40
   0  18  -2  218.88   14.40
   0  18  -2  188.48   11.30
   0  18   2  183.68   11.50
   0  18   2  202.98   14.80
   0  18   2  189.38   13.10
   0  18  -2  208.78   11.50
   2 -18   2  786.22   45.60
   2 -18   2  841.82   45.20
   2 -18   2  751.82   45.70
  -2 -18  -2  828.82   47.10
   2 -18   2  909.61   45.80
  -2 -18  -2  792.72   46.50
  -2  18  -2  760.92   48.60
   2  18   2  829.32   46.20
   2  18   2  840.22   49.20
  -2  18  -2  824.32   46.10
   2  18   2  818.52   47.40
   2  18   2  829.82   46.70
   2  18   2  900.51   47.80
   2  18   2  853.51   45.70
  -2  18  -2  846.82   48.00
  -2  18  -2  893.91   45.80
  -2  18  -2  826.82   46.60
   4 -18   2  175.18    9.80
   4 -18   2  148.49    9.60
  -4 -18  -2  163.88    9.50
   4 -18   2  172.48    9.40
  -4 -18  -2  151.28   10.20
   4 -18   2  163.98    9.60
   4 -18   2  165.78    9.10
   4 -18   2  170.08    9.20
   4 -18   2  151.78    9.50
  -4 -18  -2  144.89   11.20
  -4  18  -2  156.28    9.70
  -4  18  -2  150.28   10.00
   4  18   2  149.88   11.00
  -4  18  -2  148.79   12.90
  -4  18  -2  166.08    9.70
  -4  18  -2  151.08   11.40
   4  18   2  168.18    9.20
  -4  18  -2  160.78    9.80
   4  18   2  160.38    9.90
   4  18   2  174.48   12.80
  -6 -18  -2  326.37   19.70
   6 -18   2  340.97   18.90
  -6 -18  -2  317.27   18.80
  -6  18  -2  337.97   19.10
   6  18   2  338.77   18.70
   8 -18   2   71.49    4.00
   8 -18   2   64.59    4.30
   8 -18   2   73.39    4.10
   8 -18   2   72.89    4.00
   8 -18   2   67.49    4.20
   8  18   2   66.89    4.10
   8  18   2   63.79    4.30
   8  18   2   61.79    4.00
  -7 -19   2   70.59    4.20
   7 -19  -2   60.99    3.70
   7 -19  -2   63.09    3.90
   7 -19  -2   66.79    3.70
   7 -19  -2   55.99    4.30
   7  19  -2   57.09    3.80
  -7  19   2   63.49    4.70
  -7  19   2   62.49    4.80
  -7  19   2   52.59    4.70
  -7  19   2   61.09    4.60
   5 -19  -2   13.80    1.50
  -5 -19   2   15.50    2.20
   5 -19  -2   14.10    1.60
   5 -19  -2   13.70    1.30
   5 -19  -2   14.00    1.40
  -5 -19   2   18.90    2.60
  -5 -19   2   17.80    1.80
   5 -19  -2   17.50    2.30
   5  19  -2   14.30    1.40
  -5  19   2   16.10    2.80
  -5  19   2   16.90    5.80
  -5  19   2   15.50    2.70
   5  19  -2   17.90    2.20
  -5  19   2   16.90    2.60
  -5  19   2   14.70    5.10
   5  19  -2   18.70    5.40
  -5  19   2   17.80    2.80
   5  19  -2   10.00    2.70
  -5  19   2   18.60    3.00
   5  19  -2   12.50    1.60
   5  19  -2   15.00    1.40
   3 -19  -2   64.89    4.30
   3 -19  -2   59.29    3.80
  -3 -19   2   59.89    4.00
  -3 -19   2   56.69    4.90
   3 -19  -2   58.69    4.40
   3 -19  -2   62.89    3.70
   3 -19  -2   56.19    3.90
   3 -19  -2   63.89    4.10
   3 -19  -2   59.59    3.70
  -3 -19   2   52.49    4.50
  -3 -19   2   57.69    4.00
   3  19  -2   58.39    5.80
   3  19  -2   54.19    5.10
   3  19  -2   60.19    6.10
  -3  19   2   60.59    5.00
  -3  19   2   59.59    5.90
   3  19  -2   66.19    5.00
   3  19  -2   66.29    4.30
  -3  19   2   68.29    4.80
  -3  19   2   65.09    9.50
   3  19  -2   64.89    4.40
   3  19  -2   62.99    6.70
   3  19  -2   59.29    4.20
  -3  19   2   64.39    5.50
  -3  19   2   59.69    7.60
  -3  19   2   62.29    8.30
   3  19  -2   63.09    4.10
  -3  19   2   63.59    4.70
  -1 -19   2  289.17   16.70
  -1 -19   2  251.97   15.60
  -1 -19   2  291.57   15.80
  -1 -19   2  285.47   15.80
   1 -19  -2  249.58   15.50
   1 -19  -2  291.37   16.50
  -1 -19   2  278.37   16.00
   1  19  -2  287.27   16.00
  -1  19   2  302.57   16.20
  -1  19   2  289.17   19.90
   1  19  -2  293.27   18.60
   1  19  -2  268.57   15.90
   1  19  -2  281.47   16.00
  -1  19   2  286.57   16.30
  -1  19   2  250.67   19.40
  -1  19   2  268.37   16.00
  -1  19   2  278.67   17.00
   1  19  -2  259.97   16.90
  -1  19   2  300.37   18.30
  -1  19   2  302.57   16.40
  -1  19   2  277.27   20.80
   1  19  -2  287.47   19.10
   1  19  -2  283.07   16.20
   1  19  -2  273.67   17.70
   1  19  -2  300.27   16.90
  -1  19   2  289.57   17.60
  -1 -19  -2   13.60    1.70
   1 -19   2   12.20    1.50
  -1 -19  -2   11.40    1.90
   1 -19   2   15.20    1.30
   1 -19   2   14.00    1.50
   1 -19   2   12.60    1.40
  -1 -19  -2   11.40    1.30
   1 -19   2   14.60    1.60
   1 -19   2   11.30    1.20
   1 -19   2   13.80    1.60
   1  19   2   15.60    2.60
   1  19   2   14.90    1.90
   1  19   2   10.90    1.60
   1  19   2   18.40    4.60
   1  19   2   12.80    1.60
  -1  19  -2   15.10    1.70
   1  19   2   17.60    4.70
  -1  19  -2   12.80    1.60
   1  19   2   13.00    2.00
  -1  19  -2   11.60    2.00
  -1  19  -2    8.20    2.50
   1  19   2    9.80    1.80
  -1  19  -2   11.20    2.10
  -1  19  -2   17.50    4.20
   1  19   2   15.40    2.50
  -1  19  -2   12.00    1.80
  -1  19  -2   12.90    1.90
  -1  19  -2   10.80    2.20
   3 -19   2   45.00    3.00
  -3 -19  -2   44.20    3.20
  -3 -19  -2   46.00    4.30
   3 -19   2   40.70    3.30
   3 -19   2   45.10    3.20
   3 -19   2   51.49    3.60
   3 -19   2   45.20    3.40
   3 -19   2   44.10    3.00
  -3 -19  -2   42.00    4.40
  -3  19  -2   46.30    3.60
  -3  19  -2   42.30    3.90
   3  19   2   44.60    5.60
  -3  19  -2   49.70    3.60
   3  19   2   41.30    3.10
  -3  19  -2   52.79    3.60
   3  19   2   46.60    4.60
   3  19   2   47.60    3.10
  -3  19  -2   48.70    5.10
   3  19   2   50.09    3.80
   3  19   2   48.20    3.20
  -3  19  -2   36.90    5.60
   5 -19   2   15.50    1.40
  -5 -19  -2   14.20    2.10
   5 -19   2   17.00    1.90
   5 -19   2   15.40    1.70
   5 -19   2   17.50    1.70
   5 -19   2   16.40    1.50
   5 -19   2   17.00    1.80
   5  19   2   17.50    1.50
  -5  19  -2   17.20    2.20
  -5  19  -2   18.40    2.10
   5  19   2   16.30    1.20
   7 -19   2   20.50    1.70
   7 -19   2   18.90    1.90
   7 -19   2   21.30    1.50
   7 -19   2   17.20    1.70
   7 -19   2   21.60    1.50
  -7 -19  -2   22.60    1.90
   7  19   2   20.70    1.70
  -7  19  -2   21.00    1.90
   7  19   2   18.10    1.60
   7  19   2   18.20    1.80
   8 -20  -2  147.99    8.10
   8 -20  -2  130.19    8.30
   8 -20  -2  155.18    8.20
   8 -20  -2  145.79    8.10
  -8 -20   2  156.38    8.40
  -8  20   2  137.59    8.50
   8  20  -2  154.78    8.60
  -8  20   2  139.79    8.40
  -8  20   2  136.99    8.40
   6 -20  -2   72.09    4.10
   6 -20  -2   67.99    4.40
   6 -20  -2   69.19    4.10
   6 -20  -2   68.59    4.30
   6 -20  -2   64.89    4.70
   6  20  -2   67.69    5.10
   6  20  -2   68.79    4.10
  -6  20   2   66.49    4.90
  -6  20   2   70.99    5.20
  -6  20   2   73.19    5.00
  -6  20   2   63.19    5.20
  -4 -20   2  190.28   10.60
   4 -20  -2  174.38   10.50
   4 -20  -2  171.58   10.90
   4 -20  -2  186.28   10.40
   4 -20  -2  172.18   10.50
   4 -20  -2  186.48   10.70
   4 -20  -2  177.38   10.30
  -4 -20   2  203.38   10.70
   4 -20  -2  184.38   10.20
  -4 -20   2  170.48   11.30
   4 -20  -2  181.68   10.50
  -4 -20   2  182.68   11.90
  -4 -20   2  196.08   10.80
   4  20  -2  190.08   10.60
  -4  20   2  180.58   12.90
  -4  20   2  202.98   11.30
  -4  20   2  175.68   11.70
   4  20  -2  185.78   10.90
  -4  20   2  186.98   11.00
  -4  20   2  205.28   11.60
  -4  20   2  158.48   11.90
   4  20  -2  171.48   13.70
   4  20  -2  187.58   10.70
   4  20  -2  186.88   10.60
  -4  20   2  171.98   15.40
   4  20  -2  175.78   13.20
   4  20  -2  192.18   11.70
  -2 -20   2  197.58   12.50
  -2 -20   2  192.58   11.50
  -2 -20   2  187.68   11.60
   2 -20  -2  210.58   11.40
   2 -20  -2  191.78   11.50
  -2 -20   2  192.08   11.50
   2 -20  -2  193.38   11.30
   2 -20  -2  217.68   12.20
   2 -20  -2  204.98   11.40
   2 -20  -2  205.08   11.60
  -2  20   2  185.88   13.10
   2  20  -2  215.58   12.00
  -2  20   2  188.38   11.80
  -2  20   2  217.58   12.20
  -2  20   2  200.08   14.00
   2  20  -2  200.28   14.30
  -2  20   2  195.38   15.60
   2  20  -2  192.98   12.90
   2  20  -2  211.18   12.70
   2  20  -2  204.18   13.80
  -2  20   2  196.08   12.70
  -2  20   2  211.18   12.00
  -2  20   2  204.58   12.20
   2  20  -2  213.88   11.70
   2  20  -2  209.38   11.70
  -2  20   2  200.78   15.50
   0 -20   2  199.48   12.00
   0 -20   2  208.58   11.70
   0 -20   2  212.78   11.80
   0 -20   2  197.28   12.10
   0 -20  -2  196.68   12.30
   0 -20   2  216.18   11.40
   0 -20   2  193.48   11.30
   0 -20  -2  189.08   11.40
   0  20   2  221.98   11.80
   0  20  -2  189.28   14.50
   0  20   2  217.58   14.90
   0  20  -2  188.58   11.60
   0  20  -2  186.18   13.90
   0  20  -2  194.38   12.50
   0  20   2  212.28   13.90
   0  20  -2  178.18   13.00
   0  20  -2  186.48   11.60
   0  20   2  211.68   11.90
   0  20   2  204.78   13.40
   0  20   2  204.38   11.60
   0  20   2  218.88   15.60
   0  20   2  195.78   11.70
   0  20   2  204.18   12.30
   0  20   2  201.88   12.70
   0  20  -2  196.98   11.70
   2 -20   2  416.16   23.30
  -2 -20  -2  365.26   23.90
  -2 -20  -2  413.16   24.20
   2 -20   2  391.46   23.00
   2 -20   2  426.26   23.30
   2  20   2  401.76   25.20
  -2  20  -2  447.26   24.00
   2  20   2  400.86   26.80
   2  20   2  372.16   25.30
   2  20   2  415.66   23.00
  -2  20  -2  437.16   24.50
  -2  20  -2  438.26   23.20
   2  20   2  425.96   23.80
  -2  20  -2  422.86   23.90
   2  20   2  402.46   23.20
   2  20   2  420.76   23.10
  -2  20  -2  420.66   23.10
   2  20   2  432.86   23.10
  -4 -20  -2  262.17   14.80
   4 -20   2  262.97   14.90
   4 -20   2  259.37   14.80
   4 -20   2  261.07   14.50
   4 -20   2  250.67   15.00
   4  20   2  265.17   14.50
  -4  20  -2  254.67   17.40
  -4  20  -2  251.67   15.20
  -4  20  -2  287.07   15.00
   4  20   2  239.48   17.90
  -4  20  -2  264.67   15.70
   4  20   2  241.58   15.20
   6 -20   2  305.97   17.50
   6 -20   2  340.77   17.70
  -6 -20  -2  302.77   17.50
   6  20   2  318.27   17.30
  -6  20  -2  289.67   17.50
   6  20   2  307.47   17.50
   8 -20   2   26.30    1.70
   8 -20   2   25.00    1.60
   8 -20   2   26.80    1.60
   8 -20   2   23.00    1.80
   8  20   2   24.20    1.70
  -7 -21   2   31.50    2.40
  -7 -21   2   32.30    2.20
   7 -21  -2   38.10    2.20
   7 -21  -2   37.80    2.20
   7 -21  -2   34.10    2.50
  -7  21   2   35.80    2.70
  -7  21   2   30.20    2.70
  -7  21   2   27.80    2.60
  -7  21   2   31.40    2.80
   5 -21  -2   41.90    3.30
   5 -21  -2   47.30    3.00
   5 -21  -2   41.50    3.10
   5 -21  -2   46.30    2.80
  -5 -21   2   43.50    2.90
   5 -21  -2   46.90    2.80
  -5 -21   2   43.60    3.10
  -5 -21   2   42.10    3.10
  -5  21   2   44.60    3.80
  -5  21   2   39.80    3.60
   5  21  -2   43.20    2.90
   5  21  -2   44.10    2.90
   5  21  -2   45.10    3.80
  -5  21   2   45.30    3.70
  -5  21   2   43.20    3.60
   3 -21  -2   29.70    2.40
  -3 -21   2   27.30    2.20
  -3 -21   2   24.50    2.20
  -3 -21   2   28.70    3.00
   3 -21  -2   26.90    2.20
   3 -21  -2   23.40    2.40
  -3 -21   2   30.00    2.30
   3 -21  -2   30.60    2.10
   3 -21  -2   28.90    2.00
   3 -21  -2   29.00    1.90
  -3 -21   2   26.40    2.20
   3 -21  -2   25.90    2.30
   3  21  -2   28.30    2.50
  -3  21   2   34.30    3.30
   3  21  -2   29.00    2.50
  -3  21   2   38.20    4.50
   3  21  -2   28.90    4.00
   3  21  -2   29.20    2.30
   3  21  -2   28.90    4.40
   3  21  -2   25.00    3.40
   3  21  -2   27.40    2.40
   3  21  -2   31.70    3.10
   3  21  -2   25.50    3.70
   1 -21  -2  116.59    7.10
   1 -21  -2  120.69    7.40
  -1 -21   2  127.09    7.40
   1 -21  -2  121.49    7.30
  -1 -21   2  129.09    8.10
   1 -21  -2  121.09    8.10
  -1 -21   2  131.89    7.60
   1  21  -2  128.19    7.70
   1  21  -2  118.19    9.80
  -1  21   2  131.39    7.70
  -1  21   2  135.49    8.30
  -1  21   2  126.19    9.70
   1  21  -2  118.49    7.80
  -1  21   2  116.69   11.80
  -1  21   2  125.39   11.20
  -1  21   2  129.49    7.80
   1  21  -2  131.29    7.70
  -1  21   2  128.29    7.80
  -1  21   2  124.89    8.60
  -1  21   2  123.49    9.20
   1  21  -2  119.79    8.40
  -1  21   2  117.59    7.80
   1  21  -2  126.79    7.50
   1 -21   2   26.00    2.10
   1 -21   2   31.90    2.60
   1 -21   2   30.40    2.00
   1 -21   2   31.90    2.60
   1 -21   2   26.80    2.40
   1 -21   2   29.70    2.20
  -1 -21  -2   30.40    3.00
  -1  21  -2   32.10    4.20
   1  21   2   30.20    3.30
   1  21   2   29.50    2.60
   1  21   2   28.60    3.80
   1  21   2   27.50    3.70
   1  21   2   30.70    2.90
  -1  21  -2   32.10    2.60
  -1  21  -2   31.60    3.40
  -1  21  -2   33.60    3.20
   1  21   2   33.60    2.50
   1  21   2   26.60    4.60
  -1  21  -2   31.60    2.60
  -1  21  -2   33.70    2.80
  -1  21  -2   28.00    2.90
  -1  21  -2   33.20    4.80
   1  21   2   29.90    2.50
   1  21   2   28.40    2.50
  -3 -21  -2   36.40    3.80
   3 -21   2   39.60    3.10
   3 -21   2   43.50    2.70
  -3 -21  -2   37.20    2.90
   3 -21   2   40.30    2.90
   3 -21   2   41.70    2.90
   3 -21   2   35.30    2.90
   3  21   2   43.30    2.80
  -3  21  -2   38.00    4.60
   3  21   2   37.80    5.20
   3  21   2   40.90    2.80
   3  21   2   38.70    3.30
  -3  21  -2   44.00    3.60
   3  21   2   39.40    2.70
  -3  21  -2   35.30    3.60
  -3  21  -2   37.30    3.30
   5 -21   2  117.89    7.80
  -5 -21  -2  140.49    8.00
   5 -21   2  126.69    7.90
   5 -21   2  137.29    8.10
   5 -21   2  134.79    7.60
   5 -21   2  134.49    7.80
   5 -21   2  141.49    7.70
  -5  21  -2  137.59    8.00
  -5  21  -2  138.59    8.00
  -5  21  -2  121.29    8.40
   7 -21   2   51.19    3.60
   7 -21   2   63.59    3.60
  -7 -21  -2   55.89    3.70
   7 -21   2   54.19    3.60
   7 -21   2   58.59    3.40
   7 -21   2   58.49    3.40
   7  21   2   58.79    3.60
   6 -22  -2  172.88   10.30
   6 -22  -2  197.38   10.50
  -6 -22   2  198.58   10.70
   6 -22  -2  186.78   10.50
   6 -22  -2  186.38   10.40
  -6 -22   2  191.28   10.40
   6 -22  -2  171.88   10.60
  -6  22   2  173.38   10.70
  -6  22   2  193.98   10.70
  -6  22   2  178.68   11.00
  -6  22   2  189.98   10.90
   6  22  -2  190.58   10.30
   4 -22  -2   45.80    3.00
   4 -22  -2   45.90    3.50
   4 -22  -2   45.40    3.10
  -4 -22   2   49.90    3.30
  -4 -22   2   51.69    3.20
   4 -22  -2   50.99    3.40
  -4 -22   2   51.59    3.40
   4 -22  -2   45.40    3.20
   4  22  -2   50.49    4.10
   4  22  -2   46.50    3.30
   4  22  -2   47.10    3.60
  -4  22   2   55.09    3.90
   4  22  -2   49.40    3.30
  -4  22   2   56.69    3.90
   4  22  -2   46.20    3.30
   2 -22  -2  221.98   12.80
  -2 -22   2  227.98   13.00
  -2 -22   2  224.68   13.90
  -2 -22   2  225.08   13.20
  -2 -22   2  243.08   13.30
   2 -22  -2  213.28   13.40
   2 -22  -2  230.68   13.20
  -2  22   2  236.08   14.00
  -2  22   2  247.78   13.50
  -2  22   2  236.78   13.30
  -2  22   2  223.88   19.00
   2  22  -2  230.98   13.40
   2  22  -2  223.68   14.10
   2  22  -2  233.48   13.10
  -2  22   2  210.88   14.80
   2  22  -2  235.58   13.20
  -2  22   2  239.38   13.60
   2  22  -2  226.18   18.00
   0 -22  -2  133.99    7.70
   0 -22  -2  122.49    7.50
   0 -22   2  137.19    8.10
   0 -22  -2  133.09    8.70
   0 -22   2  127.99    7.60
   0 -22   2  130.09    8.10
   0 -22   2  133.59    7.60
   0 -22  -2  131.09    7.90
   0  22   2  142.49    8.00
   0  22  -2  115.69    8.70
   0  22  -2  143.69    8.90
   0  22  -2  121.99   10.20
   0  22  -2  140.39    7.90
   0  22   2  122.69   11.20
   0  22  -2  139.19    8.00
   0  22   2  141.29    8.10
   0  22   2  116.99    9.60
   0  22   2  135.79    8.70
   0  22   2  125.19    9.00
   0  22  -2  135.09    8.10
   0  22   2  128.19   10.10
   0  22  -2  135.49    8.20
   0  22   2  137.29    8.10
   2 -22   2    6.70    1.20
  -2 -22  -2    4.40    1.30
   2 -22   2    7.80    1.40
   2 -22   2    5.90    1.00
  -2 -22  -2    5.00    1.00
   2 -22   2    6.20    1.30
   2 -22   2    6.10    0.90
  -2  22  -2    3.60    1.00
   2  22   2    7.00    1.10
  -2  22  -2    5.10    1.50
  -2  22  -2    4.10    1.00
  -2  22  -2    4.40    1.00
  -2  22  -2    4.20    1.20
  -2  22  -2    6.60    1.60
   2  22   2    5.70    1.30
   2  22   2    7.00    1.10
   4 -22   2  129.59    8.20
   4 -22   2  135.99    8.00
  -4 -22  -2  140.79    8.10
   4 -22   2  130.69    7.80
   4 -22   2  123.29    8.00
  -4  22  -2  147.29    8.10
   4  22   2  129.59    7.70
  -4  22  -2  136.39    8.80
  -4  22  -2  142.49    8.10
  -4  22  -2  144.19    8.20
  -6 -22  -2   28.70    2.10
   6 -22   2   24.00    2.00
   6 -22   2   26.50    2.00
  -6 -22  -2   29.20    1.90
   6 -22   2   24.80    1.80
  -6  22  -2   28.20    2.10
  -5 -23   2   62.09    3.80
   5 -23  -2   53.59    3.80
   5 -23  -2   57.39    3.60
  -5 -23   2   66.19    3.90
   5 -23  -2   61.09    3.70
   5  23  -2   56.79    3.60
  -5  23   2   64.79    4.10
  -5  23   2   61.19    4.10
  -5  23   2   62.79    4.20
   3 -23  -2   98.09    6.30
   3 -23  -2  109.79    6.10
  -3 -23   2  103.49    6.40
   3 -23  -2  104.89    6.00
  -3 -23   2  107.69    6.50
   3 -23  -2  105.29    6.50
   3  23  -2  113.39    6.40
  -3  23   2  104.19    6.70
   3  23  -2  118.29    6.40
  -3  23   2  108.49    6.80
  -3  23   2  102.89    6.60
   3  23  -2  108.39    6.50
  -3  23   2  107.09    6.70
   3  23  -2  105.59    7.30
   3  23  -2   99.59    6.60
  -1 -23   2  203.18   11.40
  -1 -23   2  194.28   11.70
   1 -23  -2  189.28   11.50
   1 -23  -2  189.68   11.20
  -1 -23   2  189.38   11.70
   1 -23  -2  201.58   11.30
   1  23  -2  195.68   12.50
   1  23  -2  211.58   11.60
  -1  23   2  199.28   11.70
  -1  23   2  187.18   12.20
   1  23  -2  211.68   11.90
   1  23  -2  219.48   11.70
  -1  23   2  202.08   11.80
  -1  23   2  215.08   11.60
  -1 -23  -2  203.88   11.90
  -1 -23  -2  208.78   11.80
   1 -23   2  193.08   11.90
   1 -23   2  205.38   12.10
   1 -23   2  199.18   12.00
   1 -23   2  195.18   11.60
  -1  23  -2  220.18   11.90
   1  23   2  208.28   12.10
   1  23   2  206.78   11.90
  -1  23  -2  215.88   12.00
  -1  23  -2  195.38   12.70
  -1  23  -2  219.98   11.90
   1  23   2  200.28   12.60
   1  23   2  220.68   11.90
  -1  23  -2  207.18   12.10
  -3 -23  -2   59.39    4.00
   3 -23   2   60.89    4.20
   3 -23   2   61.29    3.80
   3 -23   2   52.69    4.00
   3 -23   2   55.29    3.80
  -3  23  -2   68.89    4.20
  -3  23  -2   62.29    4.00
  -3  23  -2   60.29    4.70
  -3  23  -2   64.39    4.20
   3  23   2   60.59    3.80
  -3  23  -2   69.19    4.20
   5 -23   2   10.40    1.30
  -5 -23  -2   12.20    1.10
  -5 -23  -2   11.40    1.30
   5 -23   2   11.10    1.10
   5 -23   2   10.50    1.30
   5 -23   2   13.20    1.20
   5  23   2   11.00    1.10
  -5  23  -2   10.60    1.30
  -5  23  -2   12.00    1.30
  -5  23  -2   11.20    1.50
  -6 -24   2    7.50    0.90
   6 -24  -2    5.30    0.80
   6 -24  -2    6.20    0.70
   6  24  -2    6.10    0.60
  -6  24   2    5.70    0.90
  -6  24   2    7.90    1.10
  -6  24   2    8.00    1.30
  -4 -24   2   47.60    3.30
   4 -24  -2   44.70    3.30
   4 -24  -2   48.20    3.00
  -4 -24   2   47.60    3.30
   4  24  -2   50.69    3.10
  -4  24   2   56.29    3.50
  -4  24   2   52.69    3.50
   4  24  -2   49.30    3.10
  -4  24   2   54.89    3.50
  -4  24   2   46.30    3.50
   2 -24  -2   62.09    3.80
   2 -24  -2   62.79    3.80
  -2 -24   2   65.29    4.30
  -2 -24   2   66.59    4.00
  -2 -24   2   62.59    4.20
   2 -24  -2   63.59    4.20
  -2  24   2   60.99    4.70
   2  24  -2   63.69    4.20
  -2  24   2   63.69    4.40
  -2  24   2   69.29    4.30
  -2  24   2   65.99    4.30
   2  24  -2   58.69    4.30
   2  24  -2   65.89    5.00
   2  24  -2   61.69    4.00
  -2  24   2   70.09    4.30
   2  24  -2   61.99    4.20
   0 -24   2    7.90    1.20
   0 -24   2    9.50    1.40
   0 -24  -2    6.80    1.10
   0 -24   2   10.90    1.40
   0 -24   2    8.10    0.80
   0 -24  -2    6.70    1.00
   0  24   2   10.20    1.40
   0  24   2   10.00    1.30
   0  24   2    9.80    1.70
   0  24  -2    7.80    1.40
   0  24  -2    8.70    1.20
   0  24  -2    7.40    1.50
   0  24  -2    8.40    1.40
   0  24   2    7.50    1.20
   0  24  -2    7.60    1.30
   0  24   2    9.80    1.40
   2 -24   2   67.69    4.60
   2 -24   2   68.29    4.70
  -2 -24  -2   71.29    4.50
   2 -24   2   66.79    4.30
  -2 -24  -2   74.99    4.50
  -2  24  -2   76.89    4.80
   2  24   2   69.79    4.40
   2  24   2   66.79    4.30
  -2  24  -2   72.09    5.30
  -2  24  -2   77.99    4.60
  -2  24  -2   76.59    4.70
  -2  24  -2   75.89    4.70
   2  24   2   69.09    4.40
  -4 -24  -2   30.40    2.30
  -4 -24  -2   32.80    2.20
   4 -24   2   32.20    2.30
   4 -24   2   29.70    2.40
   4 -24   2   30.60    2.10
  -4  24  -2   30.30    2.40
  -4  24  -2   33.40    2.40
   4  24   2   32.10    1.90
  -5 -25   2   60.89    4.10
   5 -25  -2   71.89    4.00
  -5 -25   2   73.09    4.20
   5 -25  -2   67.69    4.10
  -5  25   2   75.79    4.30
   5  25  -2   71.39    4.00
  -5  25   2   66.39    4.20
  -5  25   2   69.39    4.30
  -3 -25   2  192.38   10.90
  -3 -25   2  196.28   11.10
   3 -25  -2  184.18   11.00
   3 -25  -2  184.08   10.70
   3  25  -2  213.88   10.90
   3  25  -2  185.88   10.90
   3  25  -2  203.28   10.90
  -3  25   2  197.88   11.00
  -3  25   2  188.58   11.10
  -3  25   2  181.08   11.10
  -3  25   2  198.98   11.10
  -1 -25   2  310.47   16.40
  -1 -25   2  277.27   16.00
  -1 -25   2  294.87   16.50
  -1 -25   2  303.17   16.40
   1 -25  -2  271.97   16.30
   1  25  -2  279.67   16.20
   1  25  -2  294.37   16.40
   1  25  -2  311.37   16.30
   1  25  -2  270.37   16.50
  -1  25   2  297.17   16.40
   1  25  -2  258.77   17.10
  -1  25   2  272.57   16.50
  -1  25   2  311.47   16.30
  -1  25   2  305.57   16.30
   1 -25   2   26.90    2.10
  -1 -25  -2   21.10    1.70
  -1 -25  -2   23.40    1.90
  -1  25  -2   20.70    1.80
  -1  25  -2   20.80    2.60
  -1  25  -2   22.30    2.00
  -1  25  -2   21.60    2.20
  -1  25  -2   22.80    2.00
   3 -25   2  155.98    9.20
  -3 -25  -2  167.28    9.40
   3 -25   2  147.89    9.40
  -3 -25  -2  169.18    9.40
   3 -25   2  144.09    9.40
  -3  25  -2  161.88    9.40
  -3  25  -2  180.08    9.30
  -3  25  -2  168.28    9.60
   3  25   2  163.78    9.20
  -3  25  -2  176.38    9.50
   5 -25   2   57.69    3.30
  -5 -25  -2   55.39    3.30
   5 -25   2   47.80    3.40
  -5  25  -2   61.09    3.60
  -4 -26   2   11.40    1.10
   4 -26  -2   10.50    0.80
  -4 -26   2   10.90    1.00
   4 -26  -2   11.40    1.10
   4  26  -2   11.90    1.00
  -4  26   2   13.20    1.30
  -2 -26   2  103.89    6.10
   2 -26  -2   98.59    6.00
  -2 -26   2  108.99    6.10
  -2 -26   2   99.09    5.70
  -2 -26   2   92.79    6.00
   2 -26  -2   93.19    5.90
   2  26  -2  104.69    5.90
  -2  26   2  100.49    6.00
   2  26  -2   98.59    6.00
  -2  26   2   93.09    6.10
  -2  26   2  113.19    6.00
   2  26  -2  100.79    5.90
  -2  26   2  102.99    6.00
   0 -26   2   85.99    5.30
   0 -26  -2   81.09    5.00
   0 -26   2   83.89    5.30
   0 -26  -2   81.59    5.30
   0 -26   2   84.59    5.10
   0  26  -2   79.59    5.40
   0  26  -2   89.89    5.20
   0  26   2   91.89    5.20
   0  26   2   94.29    5.20
  -2 -26  -2   10.60    1.10
  -2 -26  -2   11.00    1.20
   2 -26   2    8.00    1.20
  -2  26  -2   11.90    1.30
  -2  26  -2   10.60    1.50
  -2  26  -2   11.00    1.30
   2  26   2    8.90    1.00
  -2  26  -2   10.00    1.10
  -4 -26  -2   49.20    2.90
   4 -26   2   43.00    3.00
  -4 -26  -2   47.20    2.90
   3 -27  -2  126.59    7.00
  -3 -27   2  113.09    6.70
  -3 -27   2  113.29    7.00
  -3 -27   2  119.79    7.00
  -3  27   2  121.79    7.00
   3  27  -2  124.69    6.80
  -3  27   2  129.49    6.90
  -3  27   2  120.19    6.90
   1 -27  -2   69.29    4.50
  -1 -27   2   80.09    4.50
  -1 -27   2   78.99    4.60
  -1 -27   2   73.59    4.40
   1  27  -2   68.09    4.50
   1  27  -2   68.29    4.40
  -1  27   2   78.79    4.50
   1  27  -2   68.39    4.30
  -1  27   2   76.19    4.40
   1 -27   2   72.09    4.90
   1 -27   2   78.59    4.90
  -1 -27  -2   89.89    4.90
  -1 -27  -2   83.79    4.80
  -1 -27  -2   81.99    4.70
  -1  27  -2   84.59    4.70
   1  27   2   75.09    4.60
   1  27   2   75.79    4.70
  -3 -27  -2   52.19    3.30
  -3 -27  -2   56.29    3.30
   3 -27   2   55.39    3.40
   3 -27   2   51.59    3.30
  -3  27  -2   54.19    3.20
   0 -28   2   68.99    4.10
   0 -28  -2   66.39    4.00
   0 -28  -2   63.09    4.00
   0 -28   2   62.99    4.00
   0  28   2   69.39    3.90
   0  28  -2   64.59    3.90
   0  28  -2   64.79    4.00
   0  28   2   73.89    3.90
   0  28  -2   60.39    4.00
  10   0  -3    4.10    1.30
  10   0  -3    2.80    0.70
 -10   0   3    3.80    5.20
 -10   0   3    0.70    1.10
  -8   0   3    0.90    1.00
  -8   0   3    2.10    1.10
   8   0  -3    0.80    0.70
   8   0  -3    1.10    0.60
  -8   0   3    0.40    1.00
  -8   0   3    3.40    1.80
  -8   0   3    1.30    1.50
   8   0  -3    0.40    0.90
  -6   0   3   -0.60    0.90
  -6   0   3   -0.40    0.80
  -6   0   3    1.10    0.70
   6   0  -3    0.10    0.60
  -6   0   3    1.90    0.90
  -6   0   3    1.40    1.40
   6   0  -3    0.20    0.40
  -4   0   3   -0.50    0.40
  -4   0   3    0.20    0.40
   4   0  -3    0.30    0.40
  -4   0   3    0.80    0.80
  -4   0   3   -0.10    0.80
  -2   0   3    0.70    0.40
   2   0  -3    1.20    0.60
   2   0  -3    1.60    0.40
  -2   0   3    0.70    0.50
   2   0  -3    0.60    0.40
  -2   0   3    0.20    0.60
   2   0  -3    0.90    0.40
   0   0   3    1.00    1.20
  -2   0  -3    0.90    0.30
  -2   0  -3    1.40    0.40
   4   0   3    0.40    0.60
  -4   0  -3    0.90    0.50
  -4   0  -3    1.80    0.60
  -4   0  -3    0.80    0.20
  -4   0  -3    1.20    0.50
  -4   0  -3    0.70    0.40
   6   0   3    0.80    0.60
   6   0   3    0.90    0.50
   6   0   3    0.70    0.50
   6   0   3    0.50    1.50
   6   0   3    1.40    0.50
   8   0   3    1.80    0.50
  -8   0  -3    0.40    1.10
  -8   0  -3    0.80    0.50
   8   0   3    0.90    0.50
   8   0   3    1.50    0.40
  -8   0  -3    0.60    0.60
   8   0   3    0.80    0.70
  -8   0  -3    0.70    1.00
   8   0   3    0.80    0.60
   8   0   3    2.50    0.80
  10   0   3    8.80    0.90
  10   0   3    7.20    1.00
 -11  -1   3   88.99    6.80
  11  -1  -3  100.79    5.60
  11  -1  -3  102.69    6.50
 -11  -1   3   89.79    6.40
  11  -1  -3  100.79    5.50
  11   1  -3   89.29    5.50
  11   1  -3   98.79    5.40
 -11   1   3   96.49    6.90
  11   1  -3   92.69    6.40
  11   1  -3   99.39    5.60
  11   1  -3   97.19    5.50
   9  -1  -3  173.38   10.30
  -9  -1   3  174.88   11.00
   9  -1  -3  150.48    9.30
  -9  -1   3  154.28   12.20
   9  -1  -3  163.18    9.10
  -9  -1   3  170.68   10.10
  -9  -1   3  171.28   14.20
   9  -1  -3  150.68    9.20
  -9  -1   3  179.78   10.60
   9  -1  -3  138.89    9.70
   9   1  -3  142.49    9.90
   9   1  -3  151.18    9.10
  -9   1   3  177.88   10.20
  -9   1   3  145.99   11.80
  -9   1   3  173.58   10.90
  -9   1   3  165.98   14.30
  -7  -1   3   62.59    4.40
   7  -1  -3   67.19    4.50
  -7  -1   3   63.09    6.00
  -7  -1   3   58.09    4.80
  -7  -1   3   65.59    4.90
  -7  -1   3   55.99    6.40
   7  -1  -3   56.09    4.50
   7  -1  -3   51.89    3.80
   7  -1  -3   56.99    4.40
  -7   1   3   62.49    4.40
  -7   1   3   62.89    5.90
   7   1  -3   55.99    4.50
  -7   1   3   72.59    7.00
   7   1  -3   60.89    4.30
  -7   1   3   66.39    4.70
  -7   1   3   63.39    4.90
  -5  -1   3  353.26   21.00
   5  -1  -3  350.56   20.30
  -5  -1   3  345.27   21.50
  -5   1   3  337.97   19.80
  -5   1   3  367.56   21.70
  -5   1   3  335.97   20.80
   3  -1  -3  234.18   12.20
  -3  -1   3  200.78   12.80
  -3  -1   3  191.18   12.20
   3  -1  -3  222.68   12.40
   3   1  -3  211.08   12.50
   3   1  -3  223.78   12.20
  -3   1   3  222.98   12.50
   3   1  -3  197.88   11.80
  -3   1   3  220.48   13.50
   3   1  -3  211.78   12.10
  -1  -1   3  460.45   27.20
  -1   1   3  488.55   27.80
   1  -1   3  194.38   11.40
  -1   1  -3  195.48   11.30
   1   1   3  193.88   11.80
  -3  -1  -3  302.57   16.70
  -3   1  -3  305.37   16.40
  -3   1  -3  284.37   16.40
  -5  -1  -3  216.08   12.20
  -5  -1  -3  198.68   11.00
  -5  -1  -3  179.18   11.80
   5   1   3  183.38   11.90
  -5   1  -3  201.68   11.80
  -5   1  -3  193.88   10.90
  -5   1  -3  211.68   12.00
   7  -1   3   23.30    1.90
   7  -1   3   21.90    1.80
  -7  -1  -3   29.20    3.40
   7  -1   3   22.70    2.20
  -7  -1  -3   22.40    1.70
  -7  -1  -3   27.20    2.10
   7  -1   3   21.10    1.70
   7  -1   3   18.40    4.50
   7  -1   3   27.80    2.90
   7  -1   3   23.90    1.60
   7  -1   3   20.40    1.90
  -7  -1  -3   21.20    3.40
   7  -1   3   23.20    2.00
   7   1   3   24.00    2.20
  -7   1  -3   24.50    3.40
   7   1   3   20.20    1.70
   7   1   3   23.90    1.90
   7   1   3   16.20    4.30
  -7   1  -3   22.90    1.90
   7   1   3   20.20    1.60
   7   1   3   24.90    2.70
   7   1   3   23.40    1.90
  -7   1  -3   24.80    3.20
   9  -1   3  213.98   12.30
  -9  -1  -3  204.08   14.10
  -9  -1  -3  209.18   12.60
   9  -1   3  221.18   12.30
   9  -1   3  214.78   13.00
   9  -1   3  235.18   12.20
  -9  -1  -3  223.38   15.50
   9  -1   3  235.28   12.60
  -9  -1  -3  207.18   13.20
   9   1   3  203.58   12.10
  -9   1  -3  229.28   15.20
  -9   1  -3  211.18   14.10
   9   1   3  231.28   13.70
   9   1   3  208.28   12.50
  -9   1  -3  229.08   12.70
  -9   1  -3  222.08   13.20
   9   1   3  240.38   12.60
  11  -1   3   31.90    2.50
  11  -1   3   37.60    2.30
  11  -1   3   34.50    3.20
 -11  -1  -3   31.80    3.50
  11   1   3   32.60    2.20
  11   1   3   34.60    2.60
  11   1   3   29.50    2.20
  10  -2  -3   32.60    2.30
  10  -2  -3   31.70    2.50
 -10  -2   3   37.90    3.50
  10  -2  -3   34.70    2.90
  10  -2  -3   32.00    2.40
 -10  -2   3   36.40    3.70
  10  -2  -3   32.50    2.30
 -10   2   3   39.30    3.80
  10   2  -3   37.70    3.30
  10   2  -3   39.40    2.50
  10   2  -3   38.40    2.40
 -10   2   3   34.30    3.60
  -8  -2   3   41.50    5.80
   8  -2  -3   37.30    3.60
   8  -2  -3   37.20    2.70
  -8  -2   3   50.99    5.50
   8  -2  -3   39.30    2.90
   8  -2  -3   43.20    3.60
  -8  -2   3   42.60    4.10
  -8  -2   3   40.50    3.50
  -8  -2   3   43.90    4.00
   8   2  -3   47.20    3.50
  -8   2   3   46.00    3.70
  -8   2   3   37.80    5.60
  -8   2   3   42.70    4.10
  -8   2   3   44.00    4.90
   8   2  -3   36.20    2.80
  -8   2   3   44.50    3.60
  -6  -2   3  239.58   14.40
  -6  -2   3  254.87   15.10
  -6  -2   3  286.67   17.40
  -6  -2   3  249.68   15.00
  -6  -2   3  242.38   16.30
   6   2  -3  252.47   14.60
   6   2  -3  264.57   15.60
  -6   2   3  256.97   14.80
  -6   2   3  272.87   17.30
  -6   2   3  233.88   14.50
  -6   2   3  246.18   15.00
   4  -2  -3 2465.35  141.09
   4   2  -3 2470.45  143.19
   2  -2  -3 1086.29   66.99
   2   2  -3 1198.58   69.09
   0   2   3  249.58   15.30
   0   2   3  257.97   14.00
   0   2   3  253.37   13.90
   0   2   3  230.08   13.90
   2   2   3  380.36   25.50
   2   2   3  408.86   32.20
  -4  -2  -3  105.49    6.30
  -4  -2  -3  107.29    6.20
  -4  -2  -3   92.39    5.50
  -4  -2  -3  100.89    6.20
  -4   2  -3  100.89    5.70
  -4   2  -3   88.49    5.70
  -4   2  -3   86.19    5.60
  -4   2  -3   99.19    5.60
   6  -2   3  525.95   31.00
   6  -2   3  533.45   34.00
  -6  -2  -3  547.25   32.20
   6  -2   3  565.84   30.50
   6  -2   3  572.44   30.50
   6  -2   3  536.05   30.10
   6  -2   3  535.65   30.00
   6   2   3  571.34   30.90
   6   2   3  534.65   30.00
  -6   2  -3  560.04   31.60
   6   2   3  560.14   30.50
   6   2   3  540.65   30.10
   8  -2   3   39.80    2.80
  -8  -2  -3   38.70    4.20
   8  -2   3   34.30    2.50
   8  -2   3   34.60    3.10
   8  -2   3   44.50    4.10
   8  -2   3   37.90    2.50
  -8  -2  -3   40.40    3.20
  -8  -2  -3   36.70    2.70
  -8  -2  -3   45.10    5.30
   8  -2   3   38.60    2.70
  -8   2  -3   33.70    2.60
   8   2   3   37.90    2.60
   8   2   3   41.80    2.80
  -8   2  -3   40.40    3.10
   8   2   3   35.20    3.20
   8   2   3   45.10    3.80
   8   2   3   40.30    2.50
  -8   2  -3   46.30    4.70
  -8   2  -3   36.50    4.00
   8   2   3   40.80    2.90
  10  -2   3   97.49    6.10
 -10  -2  -3   77.39    6.20
  10  -2   3   97.59    5.60
  10  -2   3   85.09    6.70
  10  -2   3   88.39    5.40
  10  -2   3   89.39    5.30
  10   2   3   84.39    5.40
  10   2   3  100.59    5.60
  10   2   3   92.79    5.60
  10   2   3   94.79    6.60
  10   2   3  101.39    6.10
 -10   2  -3   96.89    6.30
 -10   2  -3  101.59    5.80
  10   2   3   89.99    5.20
 -11  -3   3   14.80    2.40
  11  -3  -3   21.30    1.40
 -11  -3   3   20.60    2.50
 -11   3   3   23.40    2.90
 -11   3   3   23.30    2.60
  11   3  -3   18.90    1.40
  11   3  -3   18.60    1.30
  11   3  -3   17.90    2.20
  11   3  -3   19.50    1.50
  -9  -3   3   96.89    7.30
  -9  -3   3   90.69    8.70
   9  -3  -3   88.89    5.80
   9  -3  -3   95.79    5.60
  -9  -3   3  101.59    6.60
   9  -3  -3   89.29    5.70
  -9  -3   3  106.39   10.30
   9  -3  -3  103.89    6.90
   9  -3  -3  101.99    6.60
  -9   3   3   83.19    7.90
   9   3  -3   93.29    6.50
  -9   3   3  100.29   10.70
  -9   3   3   96.69    7.20
  -9   3   3  103.59    6.80
  -7  -3   3   93.69    7.80
   7  -3  -3   84.29    5.80
   7  -3  -3   76.49    4.90
  -7  -3   3   84.29    8.10
  -7  -3   3   87.29    5.60
  -7  -3   3   87.39    6.20
   7  -3  -3   70.69    5.60
  -7  -3   3   82.29    6.20
  -7   3   3   92.59    6.30
  -7   3   3   86.69    8.30
   7   3  -3   73.19    5.50
  -7   3   3   91.69    7.30
  -7   3   3   84.19    5.60
  -7   3   3   85.99    5.70
   7   3  -3   90.89    5.80
   7   3  -3   75.69    6.40
  -5  -3   3  172.68   10.90
  -5  -3   3  211.58   12.90
  -5  -3   3  196.18   13.00
  -5  -3   3  176.48   11.40
   5  -3  -3  195.98   10.90
  -5  -3   3  188.18   11.50
   5   3  -3  215.18   12.10
   5   3  -3  205.88   11.20
  -5   3   3  183.98   11.10
  -5   3   3  178.78   11.40
   5   3  -3  191.68   11.30
  -5   3   3  197.68   13.30
  -5   3   3  175.18   11.00
  -5   3   3  197.38   12.30
   5   3  -3  190.88   11.60
   3  -3  -3  115.89    6.70
  -3  -3   3  119.49    7.90
   3  -3  -3  115.19    6.90
  -3  -3   3  104.89    7.00
  -3  -3   3  113.59    7.00
  -3  -3   3  106.39    7.50
  -3   3   3  126.89    8.40
   3   3  -3  117.09    7.20
   3   3  -3  116.19    6.70
   3   3  -3  123.99    7.30
   3   3  -3  112.09    6.50
  -3   3   3  106.29    7.30
  -3   3   3  108.49    6.70
   3   3  -3  118.89    6.90
  -3   3   3  110.79    7.10
  -3   3   3  107.29    6.90
  -1  -3   3   31.60    2.10
   1  -3  -3   27.80    2.00
   1  -3  -3   29.60    2.20
  -1  -3   3   33.50    2.80
  -1  -3   3   30.50    2.20
  -1  -3   3   31.70    2.20
   1   3  -3   27.00    2.00
  -1   3   3   26.00    3.30
  -1   3   3   28.90    2.40
   1   3  -3   28.10    2.20
   1   3  -3   26.80    1.90
   1  -3   3 3339.37  202.88
   1   3   3 4109.09  213.48
   3   3   3 1210.58   74.19
  -5  -3  -3   71.49    5.20
  -5  -3  -3   64.49    3.70
  -5  -3  -3   61.69    4.70
  -5  -3  -3   61.19    3.60
  -5   3  -3   55.19    4.00
  -5   3  -3   58.29    4.10
  -5   3  -3   53.59    3.70
   7  -3   3   81.79    5.10
   7  -3   3   94.99    6.60
   7  -3   3   97.99    5.30
  -7  -3  -3   90.29    5.20
   7  -3   3   80.59    5.00
   7  -3   3   81.29    5.30
   7  -3   3   77.89    5.60
   7  -3   3   90.39    5.50
   7  -3   3   77.89    5.10
  -7  -3  -3   87.59    7.60
   7   3   3   77.69    4.90
  -7   3  -3   90.29    6.90
   7   3   3   83.09    5.90
   7   3   3   86.19    5.40
   7   3   3   95.89    5.80
  -7   3  -3   80.49    5.20
   7   3   3   90.49    5.30
   7   3   3   89.29    5.20
  -7   3  -3   86.19    6.70
  -9  -3  -3   18.80    2.30
   9  -3   3   22.20    1.70
   9  -3   3   16.60    2.00
   9  -3   3   21.90    1.80
  -9  -3  -3   20.00    3.00
  -9  -3  -3   18.00    1.80
   9  -3   3   19.90    1.80
  -9  -3  -3   21.20    3.80
   9   3   3   17.00    1.50
  -9   3  -3   22.80    3.70
  -9   3  -3   18.10    1.80
   9   3   3   15.40    2.40
   9   3   3   21.50    1.80
   9   3   3   16.70    1.70
  -9   3  -3   17.90    2.00
   9   3   3   21.90    2.20
  11  -3   3    4.70    1.40
 -11  -3  -3    5.40    1.60
  11  -3   3    3.80    0.90
 -11   3  -3    3.20    1.00
  11   3   3    3.50    0.70
  11   3   3    2.70    1.10
  11   3   3    4.30    0.70
  11   3   3    5.10    1.00
 -10  -4   3  407.56   21.30
  10  -4  -3  338.47   20.40
 -10  -4   3  359.56   22.90
  10  -4  -3  379.36   20.30
 -10  -4   3  398.06   22.00
  10  -4  -3  352.96   20.40
 -10   4   3  372.36   22.00
  10   4  -3  353.66   21.20
  -8  -4   3  302.57   17.00
  -8  -4   3  298.57   17.90
   8  -4  -3  290.67   17.10
   8  -4  -3  268.47   16.40
  -8  -4   3  277.77   20.60
   8  -4  -3  301.77   16.30
   8  -4  -3  289.37   16.20
  -8  -4   3  290.67   17.90
   8  -4  -3  314.87   17.50
  -8  -4   3  282.17   19.70
  -8   4   3  301.77   17.10
  -8   4   3  303.87   21.70
  -8   4   3  270.37   17.60
  -8   4   3  305.07   19.00
  -6   4   3 1536.75   86.99
   4  -4  -3 1689.13   96.79
   4   4  -3 1616.14  100.69
  -2   4   3  526.45   31.70
   0   4   3  386.26   23.20
   2   4   3 2154.68  129.59
   4   4   3 1267.17   76.59
   6  -4   3  763.22   39.20
   6  -4   3  656.13   39.40
   6  -4   3  631.94   38.90
  -6  -4  -3  707.23   41.10
   6  -4   3  706.03   43.10
   6  -4   3  746.53   40.20
   6  -4   3  787.82   39.60
   6   4   3  734.03   39.80
   8  -4   3  442.16   24.90
   8  -4   3  456.75   25.10
   8  -4   3  431.66   25.50
   8  -4   3  479.15   26.70
  -8  -4  -3  454.95   25.70
  -8  -4  -3  487.85   27.30
   8  -4   3  437.36   24.90
   8  -4   3  438.46   24.70
   8   4   3  453.45   26.00
  -8   4  -3  452.55   26.90
   8   4   3  451.35   25.20
   8   4   3  458.35   25.70
   8   4   3  428.26   24.90
   8   4   3  459.95   25.00
  -8   4  -3  479.15   26.70
  -8   4  -3  459.15   25.40
   8   4   3  430.86   24.70
  10  -4   3  164.48    9.20
  10  -4   3  160.88    9.70
  10  -4   3  169.28    9.00
  10  -4   3  158.28    9.00
 -10  -4  -3  160.58   10.00
  10  -4   3  160.98    8.90
 -10  -4  -3  159.68    9.40
  10  -4   3  146.39    9.10
  10   4   3  166.98    9.70
  10   4   3  139.59   10.00
  10   4   3  164.58    9.30
 -10   4  -3  166.08    9.80
  11  -5  -3    9.50    0.90
  11  -5  -3    9.40    1.10
  11  -5  -3    8.30    1.50
  11  -5  -3    9.30    0.80
  11   5  -3    7.90    1.50
  11   5  -3   10.10    1.00
  11   5  -3    8.90    0.90
 -11   5   3    7.50    1.70
 -11   5   3    9.60    2.00
  -9  -5   3   21.70    2.60
   9  -5  -3   17.90    2.50
  -9  -5   3   25.10    5.80
   9  -5  -3   19.50    1.50
   9  -5  -3   20.40    1.50
   9  -5  -3   16.30    1.80
   9  -5  -3   18.80    2.60
   9  -5  -3   16.10    1.50
  -9  -5   3   19.60    2.80
  -9  -5   3   19.40    4.30
  -9  -5   3   19.10    2.70
   9  -5  -3   20.50    1.80
  -9   5   3   19.00    3.10
  -9   5   3   19.40    2.70
  -9   5   3   19.70    2.90
   9   5  -3   16.90    2.20
  -7  -5   3    7.30    1.90
   7  -5  -3    5.80    1.50
   7  -5  -3    8.40    1.70
  -7  -5   3    9.10    2.90
   7  -5  -3    6.00    0.90
  -7  -5   3    7.90    2.60
  -7  -5   3    8.30    1.50
   7  -5  -3    7.70    1.20
  -7  -5   3    5.00    1.40
   7  -5  -3    6.40    1.10
   7   5  -3    8.00    1.30
   7   5  -3    8.20    2.10
  -7   5   3    5.90    2.00
  -7   5   3    7.40    1.70
  -7   5   3    8.30    3.20
   7   5  -3    5.80    1.20
  -5  -5   3  109.39    8.30
  -5  -5   3  106.19    7.10
  -5  -5   3  102.09    6.90
  -5  -5   3  104.49    7.20
  -5  -5   3  108.39    6.50
  -5  -5   3  121.19    8.60
  -5   5   3   96.69    6.60
  -5   5   3  111.39    6.50
  -5   5   3  113.29    9.00
   5   5  -3  108.89    6.70
   5   5  -3  111.79    7.60
  -5   5   3  107.49    7.00
   5   5  -3   97.49    6.70
   5   5  -3   98.29    7.10
  -5   5   3  112.99    7.70
  -3  -5   3  136.69    8.10
  -3  -5   3  137.99    8.10
  -3  -5   3  116.79    7.80
   3  -5  -3  126.29    7.70
  -3  -5   3  140.89    8.90
  -3  -5   3  141.69    8.80
   3  -5  -3  136.79    7.90
   3  -5  -3  124.79    7.90
  -3   5   3  145.69   11.40
   3   5  -3  129.29    7.90
   3   5  -3  129.99    8.20
  -3   5   3  128.49    8.00
   3   5  -3  137.89    8.40
  -3   5   3  137.29    8.50
   3   5  -3  132.89    8.40
   3   5  -3  121.99    7.50
   3   5  -3  129.59    7.80
  -1  -5   3  170.98   10.10
   1  -5  -3  173.28    9.60
   1  -5  -3  174.68    9.80
   1   5  -3  153.38    9.30
   1   5  -3  176.98    9.70
   1   5  -3  167.98    9.50
  -1   5   3  161.48   10.00
  -1   5   3  170.38   10.30
  -1   5   3  152.88    9.80
   1   5   3  863.91   49.00
  -3  -5  -3  147.99    8.60
  -3  -5  -3  139.49    8.40
  -3  -5  -3  143.69    8.50
  -3  -5  -3  135.59    7.70
   3   5   3  147.89    8.80
   3   5   3  123.29    7.70
   3   5   3  129.59    7.80
  -5  -5  -3   16.90    2.70
  -5  -5  -3   17.40    1.40
  -5  -5  -3   16.20    1.30
  -5  -5  -3   18.70    2.30
  -5   5  -3   16.10    1.20
  -5   5  -3   16.70    3.70
   5   5   3   17.60    2.30
  -7  -5  -3   41.20    5.00
   7  -5   3   36.60    2.60
   7  -5   3   33.80    3.50
   7  -5   3   40.10    3.00
  -7  -5  -3   39.70    4.50
   7  -5   3   33.60    2.40
  -7  -5  -3   37.50    3.00
  -7  -5  -3   39.20    4.20
   7  -5   3   34.90    2.50
   7  -5   3   31.20    5.30
   7  -5   3   40.20    2.70
   7  -5   3   43.50    4.20
  -7  -5  -3   42.20    2.60
   7  -5   3   40.10    3.00
   7  -5   3   36.80    2.70
  -7   5  -3   38.40    3.70
  -7   5  -3   33.30    2.50
   7   5   3   36.90    2.80
   7   5   3   39.70    2.70
   7   5   3   36.20    3.20
   7   5   3   34.70    2.50
  -7   5  -3   37.30    3.80
   7   5   3   37.40    3.10
  -9  -5  -3    1.70    1.40
   9  -5   3    2.60    0.70
   9  -5   3    2.10    0.60
   9  -5   3    2.40    0.80
   9  -5   3    2.80    0.80
   9  -5   3    3.20    0.90
   9  -5   3    2.60    1.10
  -9  -5  -3    2.00    0.70
  -9  -5  -3    1.20    0.90
   9  -5   3    2.10    1.50
   9   5   3    1.40    0.50
  -9   5  -3    4.00    1.00
   9   5   3    1.50    0.40
   9   5   3    2.20    1.20
   9   5   3    1.60    0.60
   9   5   3    1.90    0.80
   9   5   3    2.50    0.90
 -11  -5  -3   13.70    1.40
  11  -5   3   11.30    1.00
  11  -5   3   10.20    1.80
  11  -5   3    9.50    1.10
  11  -5   3   10.80    1.30
  11   5   3   11.90    1.10
  11   5   3   10.70    1.70
  11   5   3   10.80    1.20
  11   5   3   10.00    1.00
 -10  -6   3  240.48   14.70
  10  -6  -3  209.38   14.30
 -10  -6   3  221.98   14.00
  10  -6  -3  267.37   13.90
  10  -6  -3  232.58   13.40
  10  -6  -3  235.68   13.20
  10  -6  -3  238.88   13.40
  10  -6  -3  236.88   13.20
 -10   6   3  269.47   14.60
  10   6  -3  240.98   14.20
 -10   6   3  237.88   14.80
   8  -6  -3  457.75   28.70
  -8  -6   3  553.54   30.50
  -8  -6   3  500.05   32.30
  -8  -6   3  564.44   30.20
   8  -6  -3  499.75   28.80
  -8  -6   3  526.95   33.50
   8  -6  -3  525.75   29.40
   8  -6  -3  478.15   29.60
   8   6  -3  542.95   29.40
   8   6  -3  508.25   30.70
  -8   6   3  547.65   35.30
  -8   6   3  548.85   30.10
  -6  -6   3  939.81   53.59
  -6   6   3  915.71   54.79
  -4  -6   3  361.96   21.70
  -4  -6   3  335.97   19.90
  -4  -6   3  356.66   21.60
  -4  -6   3  330.37   20.20
  -4  -6   3  391.76   20.80
   4   6  -3  370.36   20.40
   4   6  -3  358.56   19.80
   4   6  -3  355.36   19.80
  -4   6   3  397.06   23.20
  -4   6   3  369.16   21.10
  -4   6   3  326.37   20.10
   4   6  -3  361.66   20.80
   2   6  -3 1815.82  108.39
   0  -6   3 2302.07  129.79
   2   6   3 1689.13  106.99
   4   6   3  920.51   49.90
   6  -6   3 1012.10   58.89
   6  -6   3 1084.09   56.39
   6  -6   3  935.51   54.69
   8  -6   3  347.87   22.60
   8  -6   3  386.86   21.20
   8  -6   3  343.47   21.00
   8  -6   3  398.16   21.60
  -8  -6  -3  411.86   25.40
   8  -6   3  358.96   21.00
   8  -6   3  372.86   20.90
   8  -6   3  389.66   21.20
  -8  -6  -3  419.86   21.20
   8  -6   3  394.16   21.40
  -8  -6  -3  433.46   23.50
   8   6   3  398.66   21.20
  -8   6  -3  413.76   21.50
  -8   6  -3  353.06   22.30
   8   6   3  356.56   21.90
   8   6   3  359.46   21.00
   8   6   3  339.77   20.80
  10  -6   3  271.47   15.30
  10  -6   3  272.37   15.00
 -10  -6  -3  294.87   16.10
  10  -6   3  274.87   15.10
 -10  -6  -3  275.37   15.40
  10  -6   3  288.47   15.20
  10  -6   3  266.77   15.60
  10  -6   3  271.57   14.90
  10  -6   3  255.87   15.10
  10   6   3  292.77   15.70
  10   6   3  266.97   16.10
 -10   6  -3  288.87   15.90
  10   6   3  234.88   15.10
  10   6   3  260.77   15.30
  11  -7  -3   44.60    2.80
  11  -7  -3   49.00    2.90
  11  -7  -3   46.60    3.00
  11  -7  -3   45.40    2.70
  11   7  -3   47.30    2.90
  11   7  -3   48.90    2.80
 -11   7   3   48.90    4.10
  11   7  -3   39.70    3.40
 -11   7   3   47.40    5.10
   9  -7  -3  226.38   14.70
   9  -7  -3  255.17   14.00
   9  -7  -3  242.48   14.10
  -9  -7   3  265.27   15.80
   9  -7  -3  231.58   14.10
   9  -7  -3  235.18   13.90
  -9  -7   3  274.87   14.80
  -9  -7   3  264.57   15.50
  -9   7   3  271.77   15.20
  -9   7   3  253.27   18.20
   9   7  -3  244.78   14.80
  -9   7   3  255.87   15.60
   7  -7  -3  202.18   11.90
   7  -7  -3  204.78   12.10
  -7  -7   3  208.58   12.20
  -7  -7   3  205.78   14.90
  -7  -7   3  212.08   13.30
   7  -7  -3  221.78   13.00
   7  -7  -3  224.38   11.70
  -7  -7   3  205.18   15.40
  -7  -7   3  205.48   12.90
   7  -7  -3  205.68   11.80
   7  -7  -3  211.18   12.60
  -7   7   3  209.88   14.00
  -7   7   3  205.68   13.00
  -7   7   3  200.58   12.60
   7   7  -3  224.68   12.60
   7   7  -3  183.08   11.50
   7   7  -3  224.18   14.00
  -7   7   3  210.38   17.00
  -5  -7   3  498.95   28.10
  -5  -7   3  502.45   27.50
  -5  -7   3  530.15   30.00
  -5  -7   3  500.65   28.70
   5   7  -3  463.65   27.30
  -5   7   3  557.54   31.90
   5   7  -3  472.65   28.60
   5   7  -3  475.95   28.10
  -3  -7   3  321.27   19.30
  -3  -7   3  337.27   18.80
  -3   7   3  334.97   22.40
  -3   7   3  312.27   18.70
  -3   7   3  329.27   21.50
   1  -7  -3  135.49    8.30
  -1  -7   3  161.18    8.90
   1  -7  -3  144.59    8.50
   1  -7  -3  140.19    8.70
   1   7  -3  146.99    9.00
   1   7  -3  138.59    8.40
   1   7  -3  129.59    8.10
  -1   7   3  158.88    9.10
  -1   7   3  143.59    9.60
   1   7  -3  151.48    8.90
  -1   7   3  148.09    8.80
   1   7  -3  136.89    8.40
   1   7  -3  142.39    8.70
   1   7   3  749.23   45.80
  -1   7  -3  849.02   44.50
   3   7   3  919.11   63.99
   5  -7   3   96.29    5.60
   5  -7   3  100.69    7.10
   5  -7   3  107.29    6.20
  -5  -7  -3   99.09    5.90
  -5  -7  -3   92.89    5.60
  -5  -7  -3  100.39    7.10
   5  -7   3   98.39    6.50
   5  -7   3  101.59    6.10
   5  -7   3  101.19    5.80
   5   7   3   82.89    6.00
   5   7   3   84.09    5.90
   5   7   3   99.49    7.30
   5   7   3   89.89    5.70
  -5   7  -3   95.59    5.40
   7  -7   3  213.28   13.00
  -7  -7  -3  227.28   15.80
   7  -7   3  227.88   12.80
   7  -7   3  248.38   14.90
   7  -7   3  229.18   13.10
  -7  -7  -3  249.48   13.60
   7  -7   3  211.58   14.00
  -7  -7  -3  245.98   15.10
   7  -7   3  203.98   13.00
  -7  -7  -3  238.18   13.00
  -7  -7  -3  235.58   16.40
   7  -7   3  229.68   12.90
   7  -7   3  218.78   12.80
   7  -7   3  214.28   13.40
   7  -7   3  239.28   13.50
   7   7   3  252.47   13.00
   7   7   3  235.98   13.10
   7   7   3  213.88   13.50
   7   7   3  253.37   14.80
   7   7   3  229.08   13.70
   9  -7   3  310.87   16.80
   9  -7   3  278.07   18.30
   9  -7   3  290.97   16.70
  -9  -7  -3  301.87   17.70
   9  -7   3  298.27   16.60
   9  -7   3  299.67   17.40
  -9  -7  -3  305.77   17.10
  -9  -7  -3  295.77   18.70
   9  -7   3  298.67   17.00
   9  -7   3  331.27   16.90
   9  -7   3  318.07   17.00
   9   7   3  302.37   17.40
  -9   7  -3  322.67   17.50
   9   7   3  287.67   16.50
   9   7   3  303.57   16.90
   9   7   3  282.17   17.70
  11  -7   3   57.89    4.40
  11  -7   3   64.39    3.60
  11  -7   3   59.39    3.60
  11   7   3   55.39    3.70
  11   7   3   65.69    3.60
  11   7   3   57.79    3.60
  10  -8  -3   39.80    2.60
  10  -8  -3   36.40    2.40
  10  -8  -3   38.70    3.10
 -10  -8   3   40.10    3.40
  10  -8  -3   33.60    3.30
  10  -8  -3   38.30    2.40
  10   8  -3   36.20    3.10
 -10   8   3   32.60    3.50
 -10   8   3   33.20    4.00
  -8  -8   3  268.27   19.70
   8  -8  -3  296.57   15.20
   8  -8  -3  289.77   15.50
  -8  -8   3  283.37   16.70
  -8  -8   3  273.17   17.00
   8  -8  -3  281.07   15.40
   8  -8  -3  261.07   15.30
   8  -8  -3  257.37   16.50
   8  -8  -3  261.67   15.60
  -8  -8   3  244.28   18.70
   8  -8  -3  275.47   16.20
   8  -8  -3  274.37   15.20
  -8  -8   3  272.07   15.80
   8   8  -3  289.67   16.20
  -8   8   3  258.57   17.60
   8   8  -3  277.37   17.60
  -8   8   3  281.67   16.40
  -8   8   3  274.07   16.80
  -6  -8   3  426.76   24.00
   6  -8  -3  404.36   23.00
  -6  -8   3  461.35   26.60
  -6  -8   3  450.95   23.40
   6  -8  -3  379.36   24.00
   6  -8  -3  395.36   23.70
  -6  -8   3  376.96   25.80
   6  -8  -3  419.56   23.10
   6  -8  -3  391.56   22.90
  -6   8   3  444.16   25.20
   6   8  -3  404.96   22.90
  -6   8   3  433.36   24.30
  -6   8   3  397.66   30.00
   6   8  -3  426.96   25.20
  -6   8   3  470.15   29.20
  -4  -8   3  358.56   22.40
  -4  -8   3  417.56   23.10
  -4  -8   3  417.66   24.10
  -4  -8   3  381.76   23.80
  -4   8   3  423.76   26.40
  -4   8   3  390.46   22.50
  -4   8   3  424.16   27.50
   4   8  -3  349.47   22.50
   4   8  -3  427.76   23.70
   4   8  -3  405.16   22.70
   4   8  -3  398.36   23.20
   4   8  -3  405.16   23.40
  -2  -8   3  836.02   47.50
   2  -8  -3  883.61   47.20
   2  -8  -3  852.41   47.30
   0   8   3  768.62   45.00
  -2   8  -3  557.84   32.80
   4   8   3 1468.15   93.09
   6  -8   3  277.07   16.30
  -6  -8  -3  288.27   16.30
   6  -8   3  278.67   16.20
   6  -8   3  316.57   16.50
   6  -8   3  269.97   16.10
   6  -8   3  264.17   16.60
  -6  -8  -3  320.47   18.30
  -6  -8  -3  317.07   16.80
   6  -8   3  278.87   16.10
   6  -8   3  308.77   18.10
  -6  -8  -3  313.37   18.70
   6  -8   3  309.27   16.90
   6  -8   3  291.97   17.40
  -6  -8  -3  314.47   19.50
   6  -8   3  289.47   16.80
   6  -8   3  266.37   19.40
   6   8   3  300.07   16.40
   6   8   3  290.17   16.80
   6   8   3  291.77   16.90
   6   8   3  288.97   16.40
   8  -8   3   69.59    3.70
   8  -8   3   56.89    5.50
   8  -8   3   57.89    4.00
  -8  -8  -3   57.49    4.60
   8  -8   3   58.79    4.10
  -8  -8  -3   63.09    5.80
   8  -8   3   70.79    4.40
  -8  -8  -3   57.59    4.10
   8  -8   3   65.49    3.80
   8  -8   3   62.09    3.90
   8  -8   3   64.19    4.00
   8  -8   3   68.89    4.40
  -8  -8  -3   52.19    6.20
  -8  -8  -3   58.99    6.90
   8  -8   3   62.19    4.50
   8   8   3   62.49    4.50
   8   8   3   64.89    4.20
   8   8   3   58.49    3.90
   8   8   3   64.39    4.10
  -8   8  -3   59.19    4.20
   8   8   3   65.79    4.80
  10  -8   3   70.89    4.50
  10  -8   3   72.89    4.40
 -10  -8  -3   81.49    5.30
  10  -8   3   77.59    4.40
  10  -8   3   72.99    4.20
  10  -8   3   77.89    4.30
  10  -8   3   68.09    4.70
  10   8   3   73.59    4.50
  10   8   3   68.59    4.70
  10   8   3   69.29    4.40
  10   8   3   71.69    5.20
  11  -9  -3   14.80    1.40
  11  -9  -3   16.10    1.30
  11  -9  -3   16.60    1.10
  11  -9  -3   16.90    1.10
  11   9  -3   16.70    1.20
  11   9  -3   16.40    1.20
  11   9  -3   16.50    1.80
 -11   9   3   14.80    2.40
   9  -9  -3  208.38   11.40
   9  -9  -3  209.38   11.20
   9  -9  -3  188.08   11.90
   9  -9  -3  204.58   11.40
  -9  -9   3  199.58   12.40
  -9  -9   3  195.58   12.80
  -9  -9   3  190.88   11.70
   9  -9  -3  191.18   11.10
  -9   9   3  204.48   12.50
   9   9  -3  198.78   12.00
  -9   9   3  200.68   12.80
   7  -9  -3   51.19    4.50
  -7  -9   3   74.09    6.90
   7  -9  -3   57.89    3.60
   7  -9  -3   53.49    3.90
   7  -9  -3   54.09    3.60
   7  -9  -3   59.19    3.80
   7  -9  -3   54.39    4.80
   7  -9  -3   59.09    3.80
  -7   9   3   71.29    5.10
   7   9  -3   56.49    3.40
  -7   9   3   59.19   10.40
   7   9  -3   61.69    4.50
   7   9  -3   65.99    5.80
  -5  -9   3  229.98   13.30
   5  -9  -3  229.28   12.00
  -5  -9   3  218.78   14.70
  -5  -9   3  188.38   13.30
  -5  -9   3  211.98   14.50
   5  -9  -3  225.08   12.20
   5  -9  -3  224.68   12.60
  -5  -9   3  197.98   12.80
  -5  -9   3  212.48   12.30
   5  -9  -3  193.38   12.10
   5   9  -3  219.28   12.10
  -5   9   3  227.08   13.90
  -5   9   3  218.18   13.20
   5   9  -3  230.98   14.20
  -5   9   3  203.58   16.80
   5   9  -3  212.88   12.20
  -5   9   3  219.68   18.40
   5   9  -3  210.28   12.30
   5   9  -3  225.38   13.80
   5   9  -3  199.78   12.10
   5   9  -3  230.48   13.00
  -5   9   3  220.88   13.00
   5   9  -3  229.08   13.20
  -3  -9   3  476.45   26.30
  -3   9   3  414.76   29.30
  -3   9   3  424.26   29.10
  -3   9   3  481.45   25.60
  -1  -9   3  960.70   53.09
  -1   9  -3  984.20   51.89
   1   9   3  956.50   53.19
  -1   9  -3  907.61   51.59
  -1   9  -3  864.81   50.39
   3   9   3  595.04   33.30
   3   9   3  579.54   32.90
  -3   9  -3  634.44   34.70
   5  -9   3  474.15   29.40
   5  -9   3  587.14   29.70
   5  -9   3  487.35   29.10
   5  -9   3  534.45   29.30
   5  -9   3  489.65   28.90
   5  -9   3  581.74   31.00
   5  -9   3  496.25   29.10
  -5  -9  -3  553.94   31.00
   5  -9   3  514.45   29.00
   5  -9   3  580.34   29.10
   5  -9   3  562.44   30.10
   5  -9   3  532.15   29.60
   5   9   3  541.45   29.60
   5   9   3  524.75   29.10
  -5   9  -3  512.45   28.90
   5   9   3  513.05   29.80
   5   9   3  553.34   31.40
   7  -9   3  281.07   15.60
   7  -9   3  302.87   16.40
  -7  -9  -3  255.57   18.40
  -7  -9  -3  309.47   15.90
  -7  -9  -3  288.37   19.60
   7  -9   3  260.37   16.80
   7  -9   3  280.97   15.80
   7  -9   3  301.07   16.30
   7  -9   3  288.67   16.00
  -7  -9  -3  310.07   17.90
  -7  -9  -3  309.17   16.60
   7  -9   3  274.87   15.70
   7  -9   3  259.07   15.80
   7  -9   3  278.47   17.70
   7  -9   3  269.57   16.30
   7  -9   3  267.07   15.60
   7   9   3  281.37   16.10
   7   9   3  266.27   16.30
   7   9   3  268.37   15.80
   7   9   3  282.17   16.50
   7   9   3  306.97   16.00
   9  -9   3  242.18   13.30
   9  -9   3  235.48   13.00
   9  -9   3  244.78   13.30
  -9  -9  -3  240.68   14.00
   9  -9   3  212.78   14.60
   9  -9   3  220.98   13.00
  -9  -9  -3  233.28   14.80
  -9  -9  -3  247.18   13.30
   9  -9   3  228.18   13.60
   9  -9   3  239.38   13.10
   9  -9   3  222.38   12.90
  -9   9  -3  226.28   13.80
   9   9   3  233.08   13.90
   9   9   3  242.18   13.30
   9   9   3  225.08   13.20
   9   9   3  236.48   13.60
  10 -10  -3    1.60    0.60
  10 -10  -3    1.50    0.40
  10 -10  -3    2.10    0.50
 -10 -10   3    1.90    0.90
  10 -10  -3    2.30    1.10
  10  10  -3    2.40    0.90
 -10  10   3    2.20    1.20
 -10  10   3    1.00    1.80
   8 -10  -3   31.00    3.20
   8 -10  -3   27.00    3.30
   8 -10  -3   32.80    2.30
  -8 -10   3   29.00    3.40
  -8 -10   3   31.40    3.20
   8 -10  -3   30.20    2.20
  -8 -10   3   29.60    2.90
  -8 -10   3   29.90    4.90
   8 -10  -3   29.30    2.50
   8 -10  -3   27.40    1.90
   8 -10  -3   33.20    2.40
  -8  10   3   31.60    3.90
   8  10  -3   35.30    4.00
   8  10  -3   33.80    3.00
  -8  10   3   31.10    3.50
  -8  10   3   32.50    3.90
  -6 -10   3   47.30    3.90
   6 -10  -3   58.09    5.70
   6 -10  -3   53.29    3.40
  -6 -10   3   56.39    4.70
   6 -10  -3   52.19    3.40
   6 -10  -3   49.40    3.70
  -6 -10   3   53.09    4.30
  -6 -10   3   61.79    4.00
   6 -10  -3   49.30    4.20
   6 -10  -3   56.99    3.60
   6 -10  -3   55.19    3.60
  -6 -10   3   59.99    6.00
  -6 -10   3   51.39    5.80
  -6  10   3   42.60    9.30
  -6  10   3   54.49    5.20
  -6  10   3   47.70    7.50
  -6  10   3   57.39    4.90
  -6  10   3   52.69    4.60
   6  10  -3   58.59    5.40
   6  10  -3   53.99    3.40
   6  10  -3   58.59    4.30
  -4 -10   3  117.59    9.20
  -4 -10   3  126.09    9.40
  -4 -10   3  117.69    7.60
  -4 -10   3  144.79    8.80
  -4 -10   3  129.49    8.50
   4 -10  -3  139.49    8.00
  -4  10   3  136.59    9.10
   4  10  -3  141.89    9.40
  -4  10   3  126.29    8.60
   4  10  -3  139.69    8.30
   4  10  -3  138.09    8.60
  -4  10   3  125.39    8.60
   4  10  -3  131.09    7.80
   4  10  -3  127.99    7.60
   4  10  -3  138.79    9.10
   4  10  -3  123.59    7.70
   4  10  -3  150.88    9.80
   4  10  -3  127.79    7.70
  -2 -10   3  141.19    8.80
   2 -10  -3  143.49    8.60
   2 -10  -3  145.09    8.50
  -2 -10   3  156.18    8.90
  -2 -10   3  140.69    9.20
  -2  10   3  158.18    9.30
  -2  10   3  139.19    9.20
  -2  10   3  149.79    9.50
   2  10  -3  127.39    8.30
   2  10  -3  140.99    8.70
  -2  10   3  165.98   13.10
  -2  10   3  158.28   10.80
   2  10  -3  149.79    8.90
   2  10  -3  142.49    9.60
   2  10  -3  138.99    9.50
   2  10  -3  134.29    8.40
   2  10  -3  144.89    9.30
   0 -10  -3  242.28   13.20
   0 -10   3  230.78   13.20
   0 -10  -3  228.48   13.80
   0 -10  -3  216.28   12.80
   0 -10  -3  237.38   14.10
   0  10  -3  247.18   14.30
   0  10   3  256.27   13.90
   0  10  -3  242.38   13.30
   0  10   3  227.18   13.20
   0  10   3  199.98   15.70
   0  10   3  211.98   14.70
   0  10  -3  254.97   14.30
   0  10   3  207.48   13.00
   0  10   3  230.08   13.50
   0  10  -3  230.68   12.90
  -2 -10  -3  482.45   28.90
  -2 -10  -3  539.85   30.10
   2  10   3  517.55   28.50
   2  10   3  552.24   30.30
   2  10   3  545.85   31.10
   2  10   3  502.65   28.80
  -2  10  -3  527.95   29.40
  -2  10  -3  508.95   29.50
   2  10   3  508.55   29.20
  -2  10  -3  505.05   30.20
  -4 -10  -3  228.78   14.70
   4 -10   3  207.08   13.70
   4 -10   3  224.88   12.20
  -4 -10  -3  231.38   13.80
  -4 -10  -3  225.98   12.50
   4 -10   3  225.18   12.40
   4 -10   3  219.78   12.70
   4 -10   3  216.38   12.70
  -4 -10  -3  234.38   13.70
   4 -10   3  228.08   13.00
   4  10   3  214.58   12.80
  -4  10  -3  195.98   12.10
   4  10   3  195.78   12.30
   4  10   3  227.38   14.30
  -4  10  -3  209.68   14.20
  -4  10  -3  217.38   12.30
   6 -10   3    4.80    0.70
  -6 -10  -3    6.10    1.20
  -6 -10  -3    7.50    2.10
  -6 -10  -3    5.70    0.90
   6 -10   3    3.50    0.70
   6 -10   3    5.40    1.50
  -6 -10  -3    5.40    2.00
   6 -10   3    4.30    1.20
   6 -10   3    4.20    0.80
  -6 -10  -3    7.90    2.70
   6 -10   3    4.40    0.70
   6 -10   3    5.70    1.20
   6 -10   3    6.60    1.20
   6 -10   3    4.30    1.80
   6 -10   3    5.10    0.90
   6  10   3    4.40    1.00
   6  10   3    5.50    1.00
   6  10   3    6.80    2.10
   6  10   3    5.90    1.20
   8 -10   3   52.89    3.30
   8 -10   3   51.19    3.70
  -8 -10  -3   55.39    4.30
   8 -10   3   55.59    3.50
  -8 -10  -3   56.39    3.70
   8 -10   3   52.39    3.30
  -8 -10  -3   48.10    6.20
   8 -10   3   54.69    3.90
   8 -10   3   55.09    3.60
   8 -10   3   56.59    3.60
  -8 -10  -3   56.29    5.10
   8 -10   3   59.49    4.00
   8 -10   3   55.19    3.90
   8  10   3   53.29    4.00
   8  10   3   49.40    3.40
   8  10   3   50.39    3.60
   8  10   3   59.09    3.80
   8  10   3   55.29    4.20
  10 -10   3    8.10    1.00
  10 -10   3    7.50    1.00
  10 -10   3    8.00    0.70
 -10 -10  -3    9.20    1.20
  10 -10   3    9.50    0.90
  10 -10   3    7.40    0.90
  10 -10   3    8.70    2.00
 -10 -10  -3    7.90    1.40
  10  10   3    7.80    0.90
  10  10   3    6.40    1.40
  10  10   3    8.80    1.00
  10  10   3    7.70    1.10
  -9 -11   3    7.50    1.40
  -9 -11   3   13.20    2.10
   9 -11  -3   10.20    1.40
   9 -11  -3   10.00    1.10
   9 -11  -3   10.30    1.10
   9 -11  -3   10.40    1.90
   9  11  -3   12.00    1.70
  -9  11   3   11.90    2.70
  -9  11   3   11.70    2.30
   9  11  -3    7.50    1.40
  -9  11   3    7.50    5.90
   7 -11  -3  110.19    6.20
   7 -11  -3  100.19    6.90
   7 -11  -3  100.19    7.20
  -7 -11   3   95.89    7.40
   7 -11  -3  101.39    6.10
  -7 -11   3   98.19    9.10
   7 -11  -3  106.39    5.90
  -7 -11   3   93.89    6.40
   7 -11  -3  105.79    6.50
  -7 -11   3   93.99    6.90
  -7 -11   3   87.69    6.50
   7 -11  -3  109.29    6.00
   7  11  -3  103.09    6.00
  -7  11   3   81.39   12.50
   7  11  -3  105.59    8.40
   7  11  -3  118.29    7.20
   7  11  -3  108.99    5.80
  -7  11   3   90.59    7.50
  -7  11   3   94.39    7.90
  -7  11   3   97.09    7.50
  -5 -11   3  496.05   28.10
  -5 -11   3  493.25   30.30
   5 -11  -3  482.75   27.70
  -5 -11   3  525.25   29.50
   5 -11  -3  502.35   28.40
   5 -11  -3  487.55   27.50
  -5 -11   3  518.15   28.90
   5 -11  -3  519.95   27.50
  -5 -11   3  463.85   27.70
   5  11  -3  514.25   29.00
   5  11  -3  456.15   28.60
   5  11  -3  485.05   27.90
   5  11  -3  541.95   30.20
  -5  11   3  528.65   29.60
  -5  11   3  521.55   29.10
   5  11  -3  559.24   30.70
   5  11  -3  506.35   27.80
  -5  11   3  485.25   28.70
   5  11  -3  493.45   29.60
  -3 -11   3  528.05   32.00
   3  11  -3  613.94   32.70
   3  11  -3  595.94   31.60
  -3  11   3  552.24   32.00
  -3  11   3  570.44   33.70
  -3  11   3  541.55   31.50
  -3  11   3  504.15   31.60
   1 -11  -3 1730.83   95.09
  -1 -11  -3  481.35   28.10
  -1 -11  -3  495.35   29.30
  -1  11  -3  513.65   27.80
   1  11   3  468.95   27.70
   1  11   3  532.05   28.30
   1  11   3  469.75   27.80
  -1  11  -3  507.35   29.40
   1  11   3  541.75   28.60
   1  11   3  545.05   28.70
   1  11   3  473.15   30.70
   1  11   3  536.25   29.80
  -3 -11  -3   18.40    2.40
  -3 -11  -3   18.00    1.60
  -3 -11  -3   19.90    2.30
  -3 -11  -3   17.20    1.40
  -3  11  -3   19.20    1.50
  -3  11  -3   17.40    2.30
   3  11   3   18.40    1.90
   3  11   3   22.50    2.60
   3  11   3   17.90    1.50
  -3  11  -3   17.80    3.30
   3  11   3   21.00    2.80
   5 -11   3  459.15   24.60
  -5 -11  -3  441.06   26.80
   5 -11   3  391.26   23.90
   5 -11   3  442.96   24.10
   5 -11   3  432.56   24.10
  -5 -11  -3  475.25   26.00
   5 -11   3  386.76   23.40
   5 -11   3  416.36   25.40
   5 -11   3  424.76   23.80
  -5 -11  -3  461.25   24.10
   5 -11   3  455.95   24.20
   5 -11   3  402.16   23.50
  -5 -11  -3  447.46   25.30
   5 -11   3  407.76   23.60
   5 -11   3  462.75   23.60
   5  11   3  402.66   26.00
   5  11   3  401.86   23.60
   5  11   3  392.96   24.00
  -5  11  -3  449.86   26.70
   7 -11   3   28.30    2.00
   7 -11   3   27.30    2.60
   7 -11   3   31.50    2.60
   7 -11   3   26.00    1.90
   7 -11   3   26.60    2.10
  -7 -11  -3   27.80    3.80
  -7 -11  -3   30.60    4.80
   7 -11   3   27.60    2.10
  -7 -11  -3   33.00    2.80
   7 -11   3   24.40    3.60
   7 -11   3   26.10    2.30
   7 -11   3   23.20    2.80
   7 -11   3   27.70    2.10
  -7 -11  -3   32.70    3.70
   7 -11   3   27.70    2.50
  -7  11  -3   19.80    7.20
  -7  11  -3   33.30    4.80
   7  11   3   24.00    2.30
   7  11   3   26.30    2.10
   7  11   3   25.80    2.10
   7  11   3   28.70    2.30
   7  11   3   24.20    2.50
   9 -11   3   89.79    5.20
   9 -11   3   89.89    5.60
  -9 -11  -3   94.99    6.20
   9 -11   3   91.29    6.90
  -9 -11  -3   94.59    5.60
   9 -11   3   96.89    5.10
   9 -11   3   87.19    5.30
  -9 -11  -3   89.69    6.70
   9 -11   3   91.59    5.30
   9 -11   3   88.79    5.50
   9  11   3   81.09    5.60
   9  11   3   94.29    5.50
   9  11   3   91.29    5.40
   9  11   3   83.19    5.20
   9  11   3   85.79    6.00
  10 -12  -3   17.20    1.80
  10 -12  -3   17.00    1.20
  10 -12  -3   16.60    1.40
  10 -12  -3   18.00    1.30
  10  12  -3   17.70    1.90
 -10  12   3   13.40    2.30
 -10  12   3   13.40    2.40
   8 -12  -3   72.39    5.60
  -8 -12   3   70.19    5.20
   8 -12  -3   74.39    4.60
  -8 -12   3   84.69    6.20
   8 -12  -3   76.29    4.60
   8 -12  -3   75.89    5.60
   8 -12  -3   81.59    4.90
   8  12  -3   77.69    5.50
  -8  12   3   81.39    6.40
  -8  12   3   83.59    7.40
   6 -12  -3    4.80    1.40
   6 -12  -3    5.50    0.90
   6 -12  -3    5.20    0.80
   6 -12  -3    5.10    0.90
   6  12  -3    6.50    1.00
  -6  12   3   11.20    4.90
  -6  12   3    4.70    6.30
   6  12  -3    4.70    0.90
   6  12  -3   10.70    2.90
  -6  12   3   10.00    2.50
   6  12  -3    6.50    1.50
   4 -12  -3  336.77   18.20
   4 -12  -3  300.77   18.30
  -4 -12   3  347.07   19.50
  -4 -12   3  335.07   20.50
  -4 -12   3  319.87   18.60
   4 -12  -3  334.87   18.20
   4 -12  -3  306.17   19.00
   4  12  -3  312.87   20.70
  -4  12   3  341.07   19.60
   4  12  -3  330.67   19.60
   4  12  -3  349.57   19.30
  -4  12   3  354.66   21.90
   4  12  -3  320.17   18.40
   4  12  -3  346.37   20.70
   4  12  -3  337.27   18.70
  -4  12   3  320.37   19.70
   4  12  -3  337.17   18.40
   4  12  -3  337.57   20.30
  -4  12   3  338.47   20.20
   4  12  -3  320.87   18.50
  -2  12   3  410.36   27.90
   0 -12  -3   85.69    5.80
   0 -12  -3   76.09    5.30
   0 -12  -3   80.69    5.40
   0 -12   3   94.09    5.60
   0  12  -3   85.49    6.50
   0  12  -3   77.99    5.20
   0  12  -3   87.49    5.90
   0  12  -3   85.09    5.60
   0  12   3   87.69    8.60
   0  12   3   98.09    7.40
   0  12  -3   85.79    5.60
   0  12   3   92.49    5.90
   0  12   3   83.09    5.30
   0  12   3   89.99    8.50
   0  12  -3   74.49    6.50
   0  12   3   96.09    5.50
  -2 -12  -3  835.92   46.40
  -2 -12  -3  766.52   44.70
   2  12   3  876.31   46.60
   2  12   3  745.43   44.00
   2  12   3  870.11   47.30
   2  12   3  833.22   45.20
  -2  12  -3  722.13   46.10
   2  12   3  831.62   44.80
   4 -12   3    4.50    0.80
   4 -12   3    4.30    1.10
   4 -12   3    4.00    0.90
   4 -12   3    4.70    1.20
   4 -12   3    4.90    1.10
   4 -12   3    4.70    0.70
   4 -12   3    6.40    1.20
   4 -12   3    3.70    0.70
  -4 -12  -3    1.80    1.80
   4 -12   3    5.40    0.80
   4  12   3    4.70    0.80
   4  12   3    5.40    1.30
   4  12   3    7.00    2.40
   4  12   3    4.80    0.60
  -4  12  -3    3.10    2.20
   4  12   3    4.70    1.00
   6 -12   3   35.40    2.70
   6 -12   3   46.00    3.40
   6 -12   3   36.50    2.80
   6 -12   3   40.80    3.10
  -6 -12  -3   44.60    5.50
   6 -12   3   37.90    3.20
   6 -12   3   37.40    4.30
   6 -12   3   36.60    2.60
   6 -12   3   38.90    2.80
   6 -12   3   38.90    3.00
  -6 -12  -3   49.20    5.00
   6 -12   3   40.20    3.60
   6 -12   3   41.10    2.60
   6  12   3   40.60    3.20
   6  12   3   35.20    2.70
   6  12   3   42.50    4.80
  -6  12  -3   52.29    6.00
  -6  12  -3   44.00    2.50
   6  12   3   38.40    3.00
   8 -12   3   94.49    5.90
   8 -12   3   93.59    5.40
  -8 -12  -3  110.59    7.50
   8 -12   3   88.99    7.30
   8 -12   3   94.49    5.70
   8 -12   3   94.99    5.50
   8 -12   3   96.19    6.00
   8 -12   3   90.99    5.60
   8 -12   3   97.29    5.90
   8 -12   3   93.99    6.00
   8  12   3  100.39    5.90
   8  12   3   85.89    5.50
   8  12   3   86.39    5.90
   8  12   3   94.89    5.70
   8  12   3   95.49    6.30
  10 -12   3   42.10    3.50
 -10 -12  -3   40.30    2.70
  10 -12   3   38.50    2.60
  10 -12   3   43.00    2.40
  10 -12   3   43.70    2.40
  10  12   3   36.40    2.60
  10  12   3   38.80    2.60
  -9 -13   3   21.70    3.10
   9 -13  -3   18.10    1.50
   9 -13  -3   18.70    1.70
   9 -13  -3   20.10    1.50
   9 -13  -3   21.00    2.30
   9  13  -3   22.50    2.20
  -9  13   3   13.80    2.70
   7 -13  -3   88.39    4.90
   7 -13  -3   93.99    5.20
  -7 -13   3   86.89    8.20
  -7 -13   3   82.69    6.60
   7 -13  -3   92.89    6.30
   7 -13  -3   87.59    5.40
   7 -13  -3   83.09    5.10
  -7 -13   3   77.39    5.80
  -7  13   3   86.09    6.90
  -7  13   3   72.99    8.40
   7  13  -3   95.39    5.10
   7  13  -3   87.99    6.30
   7  13  -3   96.69    7.90
  -7  13   3   79.79    7.20
   7  13  -3   89.89    5.30
   5 -13  -3  187.48   11.40
  -5 -13   3  221.18   13.60
   5 -13  -3  183.68   11.60
  -5 -13   3  198.38   12.00
  -5 -13   3  195.38   12.30
  -5 -13   3  209.08   14.20
   5 -13  -3  200.48   12.40
   5 -13  -3  201.28   11.50
  -5 -13   3  225.98   13.00
   5 -13  -3  208.28   11.90
   5  13  -3  204.68   13.10
   5  13  -3  192.48   12.50
   5  13  -3  214.68   14.00
   5  13  -3  208.48   11.70
   5  13  -3  208.78   14.60
  -5  13   3  205.68   15.40
   5  13  -3  212.08   14.20
   5  13  -3  192.68   12.70
  -5  13   3  208.28   13.20
   5  13  -3  194.58   11.60
  -5  13   3  227.08   13.30
  -5  13   3  222.88   13.80
   5  13  -3  202.58   11.70
   5  13  -3  205.48   11.90
  -3 -13   3  633.84   35.70
   3 -13  -3  651.33   34.80
   3 -13  -3  595.94   33.90
   3 -13  -3  573.34   33.90
   3  13  -3  591.64   36.50
  -3  13   3  599.54   37.90
  -3  13   3  640.94   35.60
  -3  13   3  680.23   35.20
   3  13  -3  616.64   34.20
  -3  13   3  622.84   35.50
  -3  13   3  643.44   35.90
  -1 -13   3  473.55   27.60
   1  13  -3  523.35   29.30
   1  13  -3  515.75   29.10
   1  13  -3  500.45   27.90
  -1  13   3  482.55   27.50
   1  13  -3  464.95   27.20
  -1  13   3  469.05   30.30
  -1  13   3  512.85   28.20
  -1  13   3  528.45   28.40
  -1  13   3  466.65   27.70
  -1 -13  -3   10.00    2.40
  -1 -13  -3   10.20    1.40
  -1 -13  -3    9.00    1.70
  -1 -13  -3   10.80    1.50
  -1 -13  -3    9.80    1.10
  -1  13  -3   10.40    1.50
  -1  13  -3   12.30    2.80
  -1  13  -3   12.20    1.40
   1  13   3   15.40    2.80
   1  13   3   13.40    1.30
  -1  13  -3   13.00    1.40
   1  13   3   14.30    2.00
   1  13   3   14.60    1.70
  -1  13  -3    9.40    1.30
   1  13   3   13.40    1.30
  -1  13  -3   12.80    2.60
   3 -13   3    9.90    1.30
   3 -13   3    8.30    1.10
  -3 -13  -3    6.60    2.30
  -3 -13  -3    6.20    1.00
   3 -13   3    8.20    1.00
  -3 -13  -3    8.50    1.90
  -3 -13  -3    5.10    1.60
   3 -13   3   10.90    2.20
   3 -13   3    8.00    0.90
  -3  13  -3    5.20    1.70
   3  13   3   12.40    2.70
   3  13   3    8.80    1.00
  -3  13  -3    6.50    1.10
  -3  13  -3    6.20    0.90
   3  13   3    6.80    0.90
   5 -13   3   72.49    4.30
  -5 -13  -3   61.09    4.80
   5 -13   3   67.09    4.30
  -5 -13  -3   65.59    4.30
   5 -13   3   71.09    4.90
   5 -13   3   79.29    4.70
  -5 -13  -3   64.19    5.60
  -5 -13  -3   68.79    6.20
   5 -13   3   71.59    4.70
  -5 -13  -3   59.99    6.70
   5 -13   3   71.99    4.20
   5 -13   3   74.69    6.20
   5 -13   3   69.19    4.20
   5 -13   3   76.69    5.20
   5 -13   3   70.09    4.40
  -5  13  -3   63.09    7.20
   5  13   3   71.19    4.70
   5  13   3   76.39    6.80
   7 -13   3   47.40    2.90
   7 -13   3   45.60    3.40
  -7 -13  -3   52.59    5.50
   7 -13   3   40.70    4.60
   7 -13   3   43.50    2.90
   7 -13   3   44.10    3.10
   7 -13   3   42.50    3.20
   7 -13   3   39.20    3.70
  -7 -13  -3   49.99    3.20
  -7 -13  -3   46.50    3.70
   7 -13   3   43.90    3.00
   7 -13   3   46.40    3.40
  -7 -13  -3   49.00    4.60
   7 -13   3   44.90    3.50
  -7 -13  -3   42.60    5.80
   7  13   3   41.00    3.40
   7  13   3   45.50    3.10
   7  13   3   38.80    3.20
   7  13   3   45.70    3.30
  -9 -13  -3   54.29    3.50
   9 -13   3   54.09    3.20
   9 -13   3   58.89    3.30
   9 -13   3   52.89    4.60
   9 -13   3   54.79    3.30
  -9 -13  -3   56.59    4.10
   9 -13   3   53.99    3.50
   9 -13   3   55.09    3.10
   9  13   3   52.99    3.40
   9  13   3   46.10    3.40
   9  13   3   51.49    3.40
   9  13   3   48.80    3.80
  10 -14  -3   17.10    1.70
  10 -14  -3   18.50    1.30
  10 -14  -3   19.10    1.40
  10 -14  -3   21.50    1.30
  10  14  -3   19.50    1.80
  -8 -14   3  120.19    8.60
   8 -14  -3  136.99    7.30
  -8 -14   3  115.19    7.90
   8 -14  -3  137.19    7.60
  -8  14   3  124.59    9.10
  -8  14   3  123.49    8.90
   8  14  -3  134.79    8.30
   6 -14  -3  520.15   30.40
  -6 -14   3  547.85   31.00
  -6 -14   3  526.75   30.00
   6 -14  -3  515.05   29.60
  -6 -14   3  541.15   32.70
   6  14  -3  587.14   32.80
  -6  14   3  534.25   31.80
  -6  14   3  525.35   30.80
   6  14  -3  554.64   29.40
  -6  14   3  536.25   34.50
  -6  14   3  551.34   31.50
  -6  14   3  475.25   30.80
   6  14  -3  572.54   30.80
   4 -14  -3  403.36   23.90
  -4 -14   3  413.06   23.40
  -4 -14   3  449.76   24.40
  -4 -14   3  437.56   25.40
   4 -14  -3  374.66   23.20
   4 -14  -3  426.56   23.10
  -4 -14   3  369.76   24.40
   4 -14  -3  394.56   23.00
   4 -14  -3  379.36   23.20
  -4 -14   3  428.46   23.50
   4  14  -3  436.56   24.30
   4  14  -3  447.06   24.80
  -4  14   3  426.16   24.90
  -4  14   3  421.46   25.30
  -4  14   3  436.06   28.10
  -4  14   3  441.96   24.90
   4  14  -3  407.26   26.20
   4  14  -3  432.96   25.60
  -4  14   3  362.66   29.60
   4  14  -3  448.06   23.70
  -4  14   3  470.05   24.60
  -4  14   3  413.66   24.40
   4  14  -3  455.85   26.10
  -2 -14   3  519.25   28.10
   2 -14  -3  458.05   27.50
  -2  14   3  525.95   28.90
   2  14  -3  519.55   30.10
   2  14  -3  540.35   29.50
  -2  14   3  459.75   28.00
  -2  14   3  551.34   28.20
  -2  14   3  447.66   32.50
   2  14  -3  454.05   27.50
  -2  14   3  501.45   28.50
   2  14  -3  481.85   29.70
   2  14  -3  515.65   28.60
  -2  14   3  523.25   31.70
   0 -14   3  409.96   25.00
   0  14   3  463.75   26.50
   0  14  -3  478.25   27.50
   0  14   3  429.16   28.90
   0  14   3  480.45   26.50
   0  14   3  483.25   28.10
   0  14   3  434.96   25.30
   0  14   3  408.66   29.10
   0  14  -3  487.35   25.90
   0  14   3  468.05   26.00
   0  14   3  415.26   25.50
   0  14  -3  467.25   25.30
   0  14  -3  492.05   27.30
   0  14  -3  483.75   26.40
   2 -14   3  379.26   19.80
  -2 -14  -3  325.77   20.20
   2 -14   3  320.27   19.40
  -2 -14  -3  366.56   20.90
   2 -14   3  331.97   19.20
   2 -14   3  390.26   19.80
  -2 -14  -3  332.27   20.20
  -2 -14  -3  309.47   19.60
   2 -14   3  372.56   19.80
   2 -14   3  375.26   19.70
   2 -14   3  376.86   19.80
  -2 -14  -3  335.67   21.90
   2  14   3  392.96   20.80
  -2  14  -3  339.57   20.00
  -2  14  -3  353.46   21.80
   2  14   3  374.26   22.20
  -2  14  -3  338.07   21.10
   2  14   3  313.77   19.30
  -2  14  -3  313.27   19.50
   2  14   3  344.77   19.40
   2  14   3  321.07   19.40
   2  14   3  372.06   19.80
  -2  14  -3  342.57   19.70
   2  14   3  368.26   20.80
   2  14   3  369.46   20.30
   4 -14   3  147.49    8.70
   4 -14   3  157.18    9.40
   4 -14   3  156.88    9.20
   4 -14   3  155.98    9.30
   4 -14   3  135.59    8.80
  -4 -14  -3  152.98   11.70
  -4 -14  -3  171.88    9.40
   4 -14   3  162.58    9.30
   4 -14   3  155.08   10.70
   4 -14   3  143.89    8.70
   4 -14   3  153.58    9.50
   4  14   3  147.29   11.40
  -4  14  -3  173.58    9.00
  -4  14  -3  166.78   10.70
   4  14   3  136.29    8.60
   4  14   3  139.19    9.80
  -4  14  -3  176.98   12.60
  -4  14  -3  163.88    9.20
  -4  14  -3  143.69    9.20
   4  14   3  144.99    9.10
   6 -14   3  669.33   35.00
   6 -14   3  653.23   36.30
  -6 -14  -3  581.84   38.00
  -6 -14  -3  606.14   36.90
   6 -14   3  583.24   33.90
  -6 -14  -3  656.33   35.90
  -6 -14  -3  639.54   34.80
   6  14   3  616.64   34.00
  -6  14  -3  591.84   33.80
   6  14   3  586.54   37.10
   6  14   3  631.14   34.50
   8 -14   3   44.70    2.60
   8 -14   3   39.60    3.00
   8 -14   3   40.50    2.60
   8 -14   3   41.20    4.10
  -8 -14  -3   35.90    3.80
   8 -14   3   43.90    2.80
  -8 -14  -3   35.70    2.80
   8 -14   3   44.80    3.00
  -8 -14  -3   36.50    3.30
   8 -14   3   42.70    2.50
   8  14   3   35.40    3.90
   8  14   3   38.40    3.10
   8  14   3   38.90    2.50
   8  14   3   35.50    2.80
   8  14   3   40.90    2.80
   8  14   3   38.50    2.70
   9 -15  -3    1.80    0.40
  -9 -15   3    1.30    0.80
   9 -15  -3    1.00    0.50
   9 -15  -3    1.30    0.40
  -9  15   3    0.20    1.30
  -9  15   3   -0.20    1.40
  -9  15   3    0.50    1.00
   9  15  -3    1.00    0.80
  -9  15   3   -0.50    1.40
  -7 -15   3   38.90    3.90
   7 -15  -3   48.50    2.90
   7 -15  -3   42.90    3.80
   7 -15  -3   44.00    2.80
  -7 -15   3   42.30    3.40
   7 -15  -3   45.30    3.10
   7  15  -3   44.90    2.90
  -7  15   3   43.40    4.60
  -7  15   3   44.20    5.10
  -7  15   3   38.40    4.70
  -7  15   3   37.40    4.70
   7  15  -3   41.20    3.80
   7  15  -3   43.90    2.70
  -7  15   3   30.20    9.10
   5 -15  -3   35.60    2.90
   5 -15  -3   35.90    2.50
  -5 -15   3   33.40    2.80
  -5 -15   3   37.50    3.90
   5 -15  -3   29.30    3.20
   5 -15  -3   32.80    2.60
  -5 -15   3   30.60    2.50
   5 -15  -3   30.10    2.20
   5 -15  -3   33.40    2.30
  -5 -15   3   30.40    4.00
   5 -15  -3   31.90    2.50
  -5 -15   3   32.80    3.40
   5 -15  -3   32.80    2.10
   5  15  -3   38.10    3.40
  -5  15   3   25.00    3.80
  -5  15   3   25.50    8.50
   5  15  -3   29.70    2.60
  -5  15   3   33.50    4.10
   5  15  -3   30.00    5.00
   5  15  -3   32.60    2.40
   5  15  -3   35.00    4.70
   5  15  -3   34.10    4.80
  -5  15   3   28.60    3.70
  -5  15   3   33.40    4.30
   5  15  -3   33.40    4.20
  -5  15   3   32.80    3.80
  -5  15   3   30.70    6.90
  -5  15   3   31.50    4.20
   5  15  -3   29.80    2.40
   5  15  -3   32.00    2.60
   3 -15  -3  102.59    6.60
  -3 -15   3   88.39    5.90
   3 -15  -3  101.89    5.70
  -3 -15   3  101.39    6.10
  -3 -15   3  101.99    7.00
   3 -15  -3  101.19    5.90
  -3 -15   3   91.99    6.80
   3 -15  -3   88.69    5.70
   3 -15  -3   88.29    5.80
  -3 -15   3   99.99    6.70
   3 -15  -3  109.09    5.70
   3  15  -3   93.29    6.00
  -3  15   3   82.49   11.10
  -3  15   3   98.39    9.90
   3  15  -3   92.69    8.20
  -3  15   3   87.19    6.90
  -3  15   3   95.39    7.10
   3  15  -3  109.59    8.40
   3  15  -3  104.99    6.30
  -3  15   3  111.19    7.80
   3  15  -3   98.09    6.20
   3  15  -3   96.09    6.10
  -3  15   3  103.89    7.00
   3  15  -3  107.19    7.00
   3  15  -3  104.79    7.20
  -3  15   3  110.39    7.50
   3  15  -3   99.09    7.80
  -1 -15   3   41.70    3.30
  -1 -15   3   43.50    2.80
  -1 -15   3   40.50    3.20
   1 -15  -3   42.50    3.30
  -1 -15   3   35.50    2.90
  -1 -15   3   39.80    2.70
   1 -15  -3   40.10    2.60
   1 -15  -3   38.40    2.60
  -1 -15   3   45.10    2.90
   1 -15  -3   44.00    3.30
   1  15  -3   46.40    3.60
   1  15  -3   41.30    3.00
   1  15  -3   44.10    4.00
   1  15  -3   42.60    4.50
  -1  15   3   42.00    3.70
   1  15  -3   44.50    3.50
  -1  15   3   39.00    3.30
   1  15  -3   38.20    2.90
   1  15  -3   36.20    3.00
  -1  15   3   42.50    6.70
  -1  15   3   43.40    3.80
  -1  15   3   33.00    6.20
  -1  15   3   38.20    3.30
  -1  15   3   43.90    3.40
  -1  15   3   35.20    5.10
   1  15  -3   42.90    3.10
   1  15  -3   41.90    4.70
   1 -15   3    5.40    0.80
   1 -15   3    6.00    1.00
  -1 -15  -3    6.80    1.30
   1 -15   3    6.50    1.20
  -1 -15  -3    4.20    0.80
   1 -15   3    4.90    0.80
   1 -15   3    4.10    0.70
   1 -15   3    4.00    0.70
  -1 -15  -3    5.60    1.00
  -1 -15  -3    4.70    1.50
   1 -15   3    4.00    0.90
  -1  15  -3    4.30    1.00
   1  15   3    6.50    1.50
  -1  15  -3    5.30    1.30
   1  15   3    8.40    2.60
   1  15   3    8.50    3.50
   1  15   3    4.40    0.90
   1  15   3    7.20    1.20
  -1  15  -3    6.00    1.10
  -1  15  -3    6.30    1.20
   1  15   3    8.60    3.10
  -1  15  -3    8.50    2.60
   1  15   3    4.40    1.40
   1  15   3    8.70    2.00
   1  15   3    5.10    0.90
  -1  15  -3    5.40    2.00
   1  15   3    4.10    1.10
   1  15   3    3.20    0.80
   3 -15   3  248.78   14.00
  -3 -15  -3  244.98   14.50
  -3 -15  -3  265.97   16.10
  -3 -15  -3  238.68   14.20
   3 -15   3  247.68   14.60
   3 -15   3  253.27   14.50
   3 -15   3  269.97   14.70
   3 -15   3  253.27   14.00
   3 -15   3  256.57   14.50
   3 -15   3  244.58   14.50
   3 -15   3  240.98   14.10
  -3 -15  -3  249.68   14.10
  -3 -15  -3  254.87   15.30
   3  15   3  251.37   14.10
   3  15   3  263.67   15.50
   3  15   3  248.08   14.50
  -3  15  -3  264.77   14.80
  -3  15  -3  253.77   14.40
   3  15   3  243.88   16.90
  -3  15  -3  259.47   14.40
  -3  15  -3  243.28   16.00
   3  15   3  233.88   13.90
  -3  15  -3  262.47   17.30
  -5 -15  -3    7.30    2.10
   5 -15   3    5.70    0.90
   5 -15   3    8.60    2.10
  -5 -15  -3    7.20    2.30
   5 -15   3    7.70    1.30
  -5 -15  -3    4.40    1.20
   5 -15   3    6.70    1.30
   5 -15   3    7.10    1.40
  -5 -15  -3    5.50    1.00
  -5 -15  -3    5.90    2.70
   5 -15   3    6.90    1.00
   5 -15   3    4.60    1.20
  -5  15  -3    5.30    1.30
   5  15   3    6.30    1.00
  -5  15  -3    7.50    3.40
  -5  15  -3    6.60    2.10
  -5  15  -3    6.80    1.10
  -5  15  -3    6.20    0.90
  -7 -15  -3   15.80    2.00
   7 -15   3   15.50    2.80
   7 -15   3   18.10    1.40
   7 -15   3   18.10    1.90
  -7 -15  -3   17.10    1.70
   7 -15   3   16.40    1.60
   7 -15   3   17.40    1.40
  -7 -15  -3   14.80    2.40
   7 -15   3   16.90    1.90
   7  15   3   15.30    1.40
   7  15   3   16.10    1.80
   7  15   3   16.70    1.60
   7  15   3   17.20    1.70
   9 -15   3   18.10    1.20
   9 -15   3   18.60    1.20
  -9 -15  -3   15.00    1.50
   9 -15   3   18.70    1.30
   9 -15   3   16.40    1.50
   9  15   3   17.40    1.40
   9  15   3   16.10    1.40
  -8 -16   3  252.57   20.10
   8 -16  -3  262.97   14.40
   8 -16  -3  280.17   14.40
   8 -16  -3  263.67   15.10
  -8  16   3  258.07   15.50
  -8  16   3  247.08   15.90
  -8  16   3  249.38   15.60
  -6 -16   3  429.86   24.40
  -6 -16   3  391.26   25.60
  -6 -16   3  447.16   23.50
   6 -16  -3  420.26   22.90
   6 -16  -3  407.76   23.80
   6 -16  -3  408.96   23.00
   6 -16  -3  368.56   22.80
   6 -16  -3  411.76   22.90
   6  16  -3  448.66   23.00
   6  16  -3  420.86   22.80
  -6  16   3  377.76   28.20
  -6  16   3  440.66   24.90
  -6  16   3  408.96   25.20
   6  16  -3  431.46   26.30
  -6  16   3  408.26   24.20
   6  16  -3  439.16   24.30
  -6  16   3  404.06   24.90
  -4 -16   3  124.89    9.00
   4 -16  -3  134.49    8.20
  -4 -16   3  134.79    8.70
  -4 -16   3  126.19    8.90
   4 -16  -3  127.99    7.40
  -4 -16   3  139.89    7.80
   4 -16  -3  114.99    7.50
   4 -16  -3  130.79    7.30
   4 -16  -3  121.99    8.30
   4 -16  -3  133.99    8.00
   4 -16  -3  125.99    7.40
  -4 -16   3  139.29    7.90
  -4  16   3  124.19    8.70
  -4  16   3  133.49    9.10
  -4  16   3  140.79    8.90
   4  16  -3  122.19   10.40
  -4  16   3  123.39    9.10
   4  16  -3  121.09    7.70
   4  16  -3  129.99    8.00
   4  16  -3  130.29    9.20
   4  16  -3  124.89   10.10
   4  16  -3  125.99    9.80
  -4  16   3  130.09   12.10
   4  16  -3  133.19    7.90
   4  16  -3  130.49    7.70
  -4  16   3  128.99    9.50
   4  16  -3  131.29    8.70
   2 -16  -3  542.05   29.10
   2 -16  -3  471.25   29.20
   2 -16  -3  490.35   29.00
  -2 -16   3  577.54   30.30
  -2 -16   3  517.35   30.00
  -2 -16   3  493.05   29.40
   2 -16  -3  491.35   29.80
   2  16  -3  530.85   29.50
  -2  16   3  549.45   35.30
  -2  16   3  502.25   33.30
  -2  16   3  580.94   30.80
  -2  16   3  575.24   30.00
  -2  16   3  583.54   30.40
   2  16  -3  539.75   29.50
   2  16  -3  584.14   30.80
   2  16  -3  556.34   32.10
   2  16  -3  571.34   31.60
  -2  16   3  502.55   30.20
   2  16  -3  535.65   32.30
  -2  16   3  478.75   29.80
   0 -16  -3  101.09    6.30
   0 -16   3  112.89    6.70
   0 -16   3  114.69    6.60
   0 -16   3  118.99    6.70
   0 -16   3  105.29    6.30
   0 -16  -3  100.09    7.30
   0 -16   3  116.99    6.40
   0 -16  -3  103.89    7.00
   0 -16  -3  107.89    6.80
   0 -16   3  114.99    6.90
   0 -16   3   99.09    6.50
   0  16   3  119.79    9.60
   0  16  -3  101.89    8.30
   0  16   3   93.99    6.60
   0  16  -3  100.79    6.60
   0  16  -3  102.79    7.60
   0  16   3  119.59   10.50
   0  16   3  115.09    6.90
   0  16  -3   99.69    7.10
   0  16  -3   97.29    6.50
   0  16   3  117.99   10.70
   0  16  -3  101.99    6.60
   0  16   3  119.49    7.90
   0  16   3  117.09    7.50
   0  16   3  115.09    6.70
   0  16  -3  109.59    7.20
   0  16   3  108.99    6.80
   0  16   3  124.29    8.20
   0  16  -3   95.89    8.40
  -2 -16  -3  101.89    6.90
   2 -16   3   90.89    5.70
   2 -16   3   94.59    6.10
  -2 -16  -3  106.39    7.50
   2 -16   3   90.89    5.80
   2 -16   3   95.79    6.10
   2 -16   3   93.89    5.70
  -2 -16  -3   98.49    5.80
  -2 -16  -3   97.49    6.50
   2 -16   3   86.69    6.00
   2 -16   3   90.59    6.10
   2 -16   3  103.69    6.20
   2  16   3   95.39    6.20
  -2  16  -3  111.09    7.90
   2  16   3   97.69    8.50
   2  16   3  100.39    9.10
   2  16   3   85.29    5.70
  -2  16  -3  105.59    6.10
   2  16   3   91.49    7.10
  -2  16  -3  109.69    8.60
  -2  16  -3  100.79    6.70
  -2  16  -3  110.49    6.40
   2  16   3   87.89    5.90
  -2  16  -3  100.49    6.00
   2  16   3  100.49    5.90
   2  16   3   94.79    6.70
   2  16   3   91.39    5.80
   2  16   3   94.89    7.30
  -4 -16  -3  820.32   43.20
  -4 -16  -3  751.22   41.80
  -4 -16  -3  743.83   42.10
  -4 -16  -3  839.22   44.30
   4  16   3  726.83   42.10
   4  16   3  763.22   45.10
  -4  16  -3  685.43   41.90
  -4  16  -3  791.22   41.90
  -4  16  -3  769.62   45.40
  -4  16  -3  706.63   43.70
  -4  16  -3  779.92   42.30
   6 -16   3  324.57   18.50
  -6 -16  -3  283.27   18.30
  -6 -16  -3  295.97   20.50
  -6 -16  -3  299.07   17.80
   6 -16   3  344.97   18.20
   6 -16   3  330.07   17.70
  -6 -16  -3  300.07   19.20
   6 -16   3  335.07   18.30
   6 -16   3  353.66   20.00
   6  16   3  333.07   17.80
   6  16   3  329.17   18.20
   6  16   3  292.57   20.80
   8 -16   3   23.30    1.60
   8 -16   3   20.90    2.00
   8 -16   3   23.60    1.60
   8 -16   3   25.80    1.90
   8 -16   3   21.90    1.80
   8  16   3   23.70    1.80
   8  16   3   19.00    2.00
   8  16   3   25.30    1.90
   9 -17  -3   78.79    5.00
  -9 -17   3   82.09    5.00
   9 -17  -3   84.59    4.70
   9 -17  -3   86.79    4.60
   9 -17  -3   84.69    4.60
   9  17  -3   81.19    5.20
  -9  17   3   70.29    5.20
  -9  17   3   80.19    5.30
  -7 -17   3   97.89    7.30
   7 -17  -3  109.89    7.00
   7 -17  -3  104.99    6.30
   7 -17  -3  113.59    6.20
  -7 -17   3  106.89    6.70
   7  17  -3  101.89    6.20
  -7  17   3  107.09    7.70
  -7  17   3  104.39    7.50
   7  17  -3  105.59    7.20
  -7  17   3  102.59    7.40
   7  17  -3  111.09    6.00
  -5 -17   3   90.39    7.20
   5 -17  -3   95.79    6.50
  -5 -17   3   91.79    7.20
   5 -17  -3   90.29    5.40
   5 -17  -3   99.99    5.80
  -5 -17   3   97.29    6.80
   5 -17  -3   98.79    5.70
   5 -17  -3   96.79    5.30
   5 -17  -3  101.29    5.50
  -5 -17   3   87.49    5.80
  -5 -17   3   95.19    6.00
   5 -17  -3   93.49    5.70
   5  17  -3   90.49    5.90
  -5  17   3   82.79    6.80
  -5  17   3   83.09    6.90
  -5  17   3   77.59    6.90
  -5  17   3   85.69    7.30
  -5  17   3   86.49    7.10
  -5  17   3   94.39    7.00
   5  17  -3   90.89    6.70
   5  17  -3   92.59    5.70
   5  17  -3  100.99    5.70
  -5  17   3   79.49    9.60
  -5  17   3   80.79   11.20
   5  17  -3   95.59    5.70
   5  17  -3   89.99    8.10
   5  17  -3   78.29    8.20
  -3 -17   3   79.69    5.80
   3 -17  -3   80.79    5.20
   3 -17  -3   74.49    5.40
   3 -17  -3   79.69    4.50
   3 -17  -3   80.99    4.50
   3 -17  -3   75.29    4.60
   3 -17  -3   78.09    4.50
  -3 -17   3   65.59    4.80
  -3 -17   3   67.59    4.80
   3 -17  -3   77.09    4.70
   3  17  -3   81.19    5.80
   3  17  -3   79.19    5.00
   3  17  -3   78.39    7.20
  -3  17   3   67.19    8.30
   3  17  -3   75.19    6.00
   3  17  -3   82.09    5.20
   3  17  -3   80.59    4.90
  -3  17   3   64.49    5.90
   3  17  -3   69.59    4.90
  -3  17   3   62.99    6.00
  -3  17   3   82.49    5.70
   3  17  -3   79.89    6.80
  -3  17   3   65.79    5.80
   3  17  -3   66.19    6.90
  -3  17   3   66.49    5.60
  -1 -17   3  432.96   23.00
   1 -17  -3  440.66   23.50
  -1 -17   3  412.26   23.10
   1 -17  -3  449.16   23.60
   1 -17  -3  375.76   22.60
  -1 -17   3  392.96   23.50
   1  17  -3  407.06   23.10
  -1  17   3  407.46   24.00
   1  17  -3  430.16   25.70
  -1  17   3  408.66   23.30
  -1  17   3  408.26   23.50
  -1  17   3  430.06   24.90
   1  17  -3  430.96   24.90
  -1  17   3  407.66   24.50
   1  17  -3  431.46   24.00
  -1  17   3  416.86   23.50
  -1  17   3  378.86   27.40
   1  17  -3  416.26   23.10
  -1  17   3  385.36   28.20
   1  17  -3  413.46   25.80
   1  17  -3  430.36   24.10
  -1  17   3  370.16   23.10
  -1  17   3  436.26   26.90
   1  17  -3  409.66   23.00
   1 -17   3  501.85   27.90
   1 -17   3  442.46   27.60
   1 -17   3  536.85   27.90
  -1 -17  -3  495.45   28.90
  -1 -17  -3  513.55   28.50
  -1  17  -3  511.45   28.30
   1  17   3  516.05   31.10
  -1  17  -3  524.35   30.60
   1  17   3  524.75   29.40
   1  17   3  446.36   27.50
   1  17   3  476.65   29.20
  -1  17  -3  514.65   28.40
   1  17   3  542.95   31.60
   1  17   3  498.05   28.10
   1  17   3  478.25   28.60
  -1  17  -3  502.45   28.90
   1  17   3  475.55   27.70
   1  17   3  480.45   27.60
  -1  17  -3  502.75   29.90
  -1  17  -3  530.75   27.80
  -1  17  -3  515.75   27.80
   1  17   3  482.25   27.70
   3 -17   3  168.58    9.90
  -3 -17  -3  156.18   11.40
   3 -17   3  167.58   10.10
   3 -17   3  173.38    9.70
   3 -17   3  171.58   10.00
   3 -17   3  170.68   10.10
   3 -17   3  163.48    9.50
   3 -17   3  166.18    9.50
  -3 -17  -3  167.88    9.80
   3 -17   3  167.48   10.20
  -3 -17  -3  151.68   10.50
   3  17   3  172.48   12.90
   3  17   3  165.08   11.20
   3  17   3  159.38    9.50
  -3  17  -3  160.88   11.70
  -3  17  -3  183.38   10.00
  -3  17  -3  173.98   10.10
   3  17   3  159.48   10.10
  -3  17  -3  173.38    9.90
  -3  17  -3  185.98   13.00
  -3  17  -3  169.88   10.50
   3  17   3  164.88    9.60
   5 -17   3  408.06   21.20
  -5 -17  -3  357.96   23.40
  -5 -17  -3  326.87   21.00
   5 -17   3  393.56   21.30
  -5 -17  -3  361.96   22.10
  -5 -17  -3  371.86   20.80
   5 -17   3  387.26   21.20
   5 -17   3  387.86   21.50
   5  17   3  379.86   20.80
   5  17   3  389.86   24.40
  -5  17  -3  379.66   21.00
  -5  17  -3  348.77   23.10
  -5  17  -3  379.16   21.20
   7 -17   3  147.19    8.60
   7 -17   3  152.18    8.10
   7 -17   3  137.89    8.50
   7 -17   3  146.69    8.30
   7 -17   3  146.79    8.10
   7  17   3  143.69    8.40
   7  17   3  140.89    8.10
   7  17   3  148.29    8.30
   7  17   3  124.69    8.50
   8 -18  -3   31.10    2.60
   8 -18  -3   29.30    2.00
   8 -18  -3   29.70    2.10
   8 -18  -3   30.20    2.00
  -8 -18   3   34.50    2.40
  -8  18   3   30.80    2.90
  -8  18   3   30.30    3.00
  -8  18   3   28.10    2.90
   6 -18  -3   37.60    2.60
  -6 -18   3   39.70    3.70
  -6 -18   3   44.60    3.10
   6 -18  -3   37.40    3.50
   6 -18  -3   36.00    2.70
   6 -18  -3   37.90    2.60
  -6  18   3   40.10    4.20
  -6  18   3   42.10    4.00
  -6  18   3   43.90    4.10
   6  18  -3   41.20    2.70
   6  18  -3   38.20    3.60
  -6  18   3   42.60    4.00
   4 -18  -3  107.09    6.80
  -4 -18   3  105.39    7.40
   4 -18  -3  113.79    6.20
   4 -18  -3  101.09    6.40
   4 -18  -3  107.29    7.20
   4 -18  -3  103.09    6.30
   4 -18  -3  102.99    6.30
  -4 -18   3  119.99    6.80
  -4 -18   3  113.29    6.70
  -4  18   3   98.89    7.80
  -4  18   3  101.59    7.30
   4  18  -3  116.59    7.00
   4  18  -3   97.59    8.00
  -4  18   3  120.09    7.50
   4  18  -3  112.39    6.60
   4  18  -3  113.09    6.80
   4  18  -3  116.59    7.70
   4  18  -3  105.29    8.80
  -4  18   3  100.59   10.70
   4  18  -3  110.29    9.20
  -4  18   3   93.59    7.60
   4  18  -3  110.79    6.70
  -4  18   3   98.89    8.10
  -4  18   3  124.79    7.90
   2 -18  -3   52.59    3.60
  -2 -18   3   58.59    3.80
  -2 -18   3   64.39    4.60
  -2 -18   3   62.59    4.00
   2 -18  -3   53.19    3.50
   2 -18  -3   57.39    3.50
  -2 -18   3   58.29    3.80
  -2 -18   3   51.79    4.20
   2 -18  -3   57.99    4.20
   2 -18  -3   56.09    4.30
  -2 -18   3   57.49    3.80
  -2  18   3   55.09    4.30
   2  18  -3   52.99    4.80
  -2  18   3   61.19    4.40
  -2  18   3   60.09    4.50
  -2  18   3   47.80    4.50
   2  18  -3   51.69    4.50
  -2  18   3   59.89    5.50
  -2  18   3   54.19    4.70
   2  18  -3   49.80    5.60
   2  18  -3   55.29    5.40
  -2  18   3   53.69    8.00
   2  18  -3   53.19    4.00
  -2  18   3   61.39    5.30
   2  18  -3   57.19    6.00
  -2  18   3   51.49    8.10
   2  18  -3   53.69    3.80
  -2  18   3   55.69    6.90
   2  18  -3   56.29    4.10
   0  18  -3  798.12   49.10
   0  18   3  912.31   52.89
   0  18   3  900.01   48.90
   0  18  -3  817.92   48.50
   0  18  -3  825.22   47.70
   0  18   3  872.81   51.59
   0  18   3  897.31   48.30
   0  18   3  924.11   48.00
   0  18   3  956.50   52.19
   0  18  -3  802.12   47.70
   0  18  -3  837.82   50.59
   0  18   3  877.31   49.70
   0  18  -3  870.01   50.39
   0  18   3  918.31   49.60
  -2 -18  -3  121.29    8.80
   2 -18   3  123.09    7.50
   2 -18   3  118.99    7.40
   2 -18   3  120.49    7.00
   2 -18   3  118.79    7.20
   2 -18   3  137.09    7.70
  -2 -18  -3  116.89    7.20
  -2 -18  -3  130.89    8.50
   2 -18   3  129.09    7.60
   2 -18   3  114.79    7.00
   2 -18   3  118.49    7.50
   2  18   3  131.29   10.50
  -2  18  -3  119.09    7.40
   2  18   3  117.89    7.20
  -2  18  -3  116.59    8.20
  -2  18  -3  110.49    7.90
   2  18   3  129.09    7.30
  -2  18  -3  126.09   10.00
   2  18   3  124.49    8.90
   2  18   3  119.99    7.30
  -2  18  -3  110.49    9.20
   2  18   3  124.59    7.20
  -2  18  -3  110.89    7.70
  -2  18  -3  117.19    7.40
   2  18   3  132.39    7.80
  -4 -18  -3   52.89    5.30
  -4 -18  -3   54.89    4.40
   4 -18   3   50.69    3.30
   4 -18   3   56.69    3.80
   4 -18   3   48.20    3.30
   4 -18   3   52.79    3.50
   4 -18   3   54.89    3.80
   4 -18   3   48.70    3.80
  -4 -18  -3   52.79    3.60
   4 -18   3   56.29    3.90
  -4  18  -3   49.20    4.00
  -4  18  -3   45.80    3.60
  -4  18  -3   51.69    3.70
  -4  18  -3   50.29    3.70
   4  18   3   52.59    6.10
   4  18   3   54.49    3.30
   6 -18   3  117.29    7.10
   6 -18   3  111.59    7.40
  -6 -18  -3  130.69    7.40
  -6 -18  -3  114.39    8.20
   6 -18   3  124.69    6.90
   6 -18   3  114.69    7.30
   6 -18   3  125.19    6.90
  -6  18  -3  120.69    7.20
   6  18   3  120.09    7.00
   8 -18   3   41.20    2.40
   8 -18   3   40.40    2.50
   8 -18   3   38.30    2.60
   8 -18   3   34.90    2.60
   8 -18   3   40.90    2.40
   8  18   3   38.50    2.50
   8  18   3   34.70    2.50
  -7 -19   3  226.58   12.60
   7 -19  -3  223.98   12.30
   7 -19  -3  224.38   12.80
   7 -19  -3  233.88   12.20
   7 -19  -3  228.18   12.20
  -7  19   3  230.78   12.90
   7  19  -3  211.28   12.20
  -7  19   3  214.98   12.90
  -7  19   3  196.58   13.00
  -7  19   3  199.18   13.10
   5 -19  -3  104.79    6.10
   5 -19  -3  102.79    5.80
   5 -19  -3   91.59    6.70
   5 -19  -3   99.69    6.30
  -5 -19   3  100.79    7.10
   5 -19  -3   93.49    5.90
  -5 -19   3  114.89    6.50
   5 -19  -3  101.29    6.00
  -5  19   3   97.09    7.30
   5  19  -3  102.99    6.20
   5  19  -3  102.99    7.30
  -5  19   3  114.89    7.00
   5  19  -3  105.79    6.20
  -5  19   3  104.09    7.30
  -5  19   3  111.89    7.10
   5  19  -3   98.19    6.20
   3 -19  -3  131.79    7.90
  -3 -19   3  142.19    7.90
  -3 -19   3  116.89    8.50
  -3 -19   3  128.09    8.10
   3 -19  -3  133.59    7.80
  -3 -19   3  128.09    8.00
   3 -19  -3  139.49    8.40
  -3 -19   3  128.69    7.90
   3 -19  -3  138.29    7.70
   3 -19  -3  138.59    7.60
   3 -19  -3  141.49    8.40
   3 -19  -3  141.69    7.70
  -3  19   3  130.19   12.90
   3  19  -3  141.69    8.30
   3  19  -3  129.99    9.40
  -3  19   3  119.09   11.80
  -3  19   3  141.29    8.50
   3  19  -3  133.59    8.00
   3  19  -3  130.29   10.80
   3  19  -3  142.79    9.10
   3  19  -3  124.59   10.10
   3  19  -3  135.59    8.00
  -3  19   3  132.89    8.90
  -3  19   3  112.89    9.60
  -3  19   3  147.69    8.60
  -3  19   3  147.19    8.90
  -3  19   3  114.59    9.30
   3  19  -3  143.09    8.40
  -3  19   3  121.89    9.00
   3  19  -3  134.29   10.60
   1 -19  -3  473.95   27.80
  -1 -19   3  537.35   27.30
   1 -19  -3  425.76   26.70
  -1 -19   3  486.55   27.70
  -1 -19   3  507.65   27.10
  -1  19   3  511.75   31.70
   1  19  -3  518.15   30.20
   1  19  -3  492.95   29.20
   1  19  -3  492.65   28.30
   1  19  -3  510.35   27.20
   1  19  -3  474.85   27.10
  -1  19   3  508.55   27.40
   1  19  -3  513.25   28.20
  -1  19   3  507.55   32.80
  -1  19   3  451.65   27.40
  -1  19   3  465.65   27.20
  -1  19   3  472.05   31.10
  -1  19   3  470.35   29.20
  -1  19   3  492.75   28.30
  -1  19   3  477.25   28.90
   1 -19   3  104.19    6.50
  -1 -19  -3   93.79    7.00
   1 -19   3  102.19    5.80
   1 -19   3   90.19    6.30
   1 -19   3  106.69    6.40
  -1 -19  -3  103.39    6.10
   1 -19   3   96.19    5.90
   1 -19   3  101.89    6.40
   1 -19   3   91.89    6.10
   1 -19   3   98.99    6.00
   1 -19   3   89.39    5.90
  -1 -19  -3   94.49    7.00
  -1  19  -3  108.89    6.40
   1  19   3  115.79    9.80
   1  19   3  107.39    6.80
   1  19   3   99.79    7.90
  -1  19  -3  103.09    8.40
  -1  19  -3  103.69    7.50
  -1  19  -3  106.79    6.40
  -1  19  -3  104.49    7.00
  -1  19  -3  107.69    8.90
   1  19   3  100.99    7.30
  -1  19  -3   97.89    6.30
   1  19   3  101.79    6.20
   1  19   3   99.49    7.90
   1  19   3  107.89    9.40
  -1  19  -3  105.19    6.90
  -1  19  -3  106.99    6.20
   1  19   3  105.29    6.30
   1  19   3   91.89    6.20
  -3 -19  -3  676.53   39.80
   3 -19   3  711.23   38.10
   3 -19   3  627.14   37.80
   3 -19   3  668.23   38.00
  -3  19  -3  684.93   38.30
   3  19   3  681.23   37.40
   3  19   3  694.93   41.60
   3  19   3  663.73   38.20
  -3  19  -3  689.73   38.80
  -3  19  -3  752.12   38.00
  -3  19  -3  736.13   37.90
  -3  19  -3  656.33   38.50
   5 -19   3  338.57   20.90
  -5 -19  -3  364.96   20.90
   5 -19   3  391.56   21.00
  -5 -19  -3  336.47   21.60
   5 -19   3  400.06   21.00
  -5  19  -3  392.06   20.90
   5  19   3  379.16   20.60
   7 -19   3  158.78    8.70
   7 -19   3  145.19    8.90
   7 -19   3  165.08    8.60
   7 -19   3  160.98    8.60
   7 -19   3  149.09    8.90
   7  19   3  146.29    8.80
   7  19   3  144.19   10.10
   7  19   3  154.68    8.80
   8 -20  -3   35.70    2.10
  -8 -20   3   32.80    2.10
   8 -20  -3   35.30    2.00
   8 -20  -3   30.20    2.30
   8 -20  -3   33.30    2.10
  -8 -20   3   34.00    2.30
  -8  20   3   29.70    2.50
  -8  20   3   33.90    2.50
   6 -20  -3   39.70    2.60
   6 -20  -3   41.00    2.80
   6 -20  -3   40.50    3.30
   6 -20  -3   40.80    2.60
  -6 -20   3   42.10    3.00
   6  20  -3   42.80    3.60
   6  20  -3   43.30    2.70
  -6  20   3   44.50    3.60
  -6  20   3   43.60    3.80
  -6  20   3   40.20    3.50
  -6  20   3   42.10    3.60
   4 -20  -3   11.90    1.40
   4 -20  -3   10.70    1.20
   4 -20  -3   11.10    1.30
   4 -20  -3   11.80    1.00
   4 -20  -3   11.10    1.10
  -4 -20   3   11.20    1.40
   4 -20  -3   10.70    1.90
  -4 -20   3    9.00    1.90
  -4 -20   3   10.20    1.40
  -4 -20   3    9.60    1.90
  -4 -20   3   11.60    1.30
   4 -20  -3    9.60    1.10
   4  20  -3   12.50    1.30
  -4  20   3   13.90    2.20
   4  20  -3   11.40    1.40
  -4  20   3    9.00    1.80
  -4  20   3   12.30    4.60
   4  20  -3   14.80    2.00
   4  20  -3   12.10    1.50
  -4  20   3    7.10    2.00
   4  20  -3   10.30    1.50
  -4  20   3   13.30    2.30
  -2 -20   3  136.89    9.50
   2 -20  -3  149.39    8.50
   2 -20  -3  154.78    9.40
  -2 -20   3  147.49    8.80
  -2 -20   3  154.38    8.70
   2 -20  -3  137.69    8.40
  -2 -20   3  146.39    8.90
  -2 -20   3  155.58    8.70
   2 -20  -3  139.69    8.70
  -2  20   3  149.49   11.00
  -2  20   3  148.09   13.00
  -2  20   3  144.79    9.90
  -2  20   3  136.19   12.30
   2  20  -3  138.89   10.80
   2  20  -3  156.38    9.90
  -2  20   3  159.08    9.10
   2  20  -3  134.39   10.00
   2  20  -3  155.88    9.10
   2  20  -3  141.29   11.60
   2  20  -3  147.29   11.40
   2  20  -3  149.79    8.90
  -2  20   3  160.98    9.40
  -2  20   3  162.78    9.20
   2  20  -3  154.78    8.80
  -2  20   3  140.19   10.30
   0 -20   3  123.79    7.60
   0 -20   3  128.39    7.60
   0 -20  -3  133.29    8.70
   0 -20   3  130.49    8.10
   0 -20   3  134.99    8.10
   0 -20   3  125.69    7.90
   0 -20  -3  133.89    7.70
   0 -20   3  149.88    8.20
   0  20  -3  134.59    8.10
   0  20  -3  133.09    8.80
   0  20  -3  127.49    7.80
   0  20   3  135.29    7.90
   0  20   3  138.69    8.50
   0  20  -3  137.99    8.10
   0  20   3  136.99   11.40
   0  20   3  126.49    9.00
   0  20  -3  121.59   10.10
   0  20  -3  136.19    8.00
   0  20   3  124.29    9.50
   0  20  -3  127.49    8.80
   0  20  -3  127.49    9.40
   0  20   3  134.49    8.00
   0  20   3  132.19   11.30
   0  20   3  141.29    8.10
   0  20  -3  122.19   10.40
   0  20   3  126.09    9.70
   0  20   3  131.09    8.10
   2 -20   3   99.49    6.30
   2 -20   3  109.59    6.20
   2 -20   3  103.99    6.60
  -2 -20  -3  103.89    6.40
  -2 -20  -3  100.29    7.50
   2 -20   3  113.29    6.80
   2 -20   3  109.19    6.70
  -2 -20  -3   93.09    7.40
   2 -20   3   94.09    6.30
   2 -20   3  104.19    6.60
  -2  20  -3  103.79    8.60
  -2  20  -3  115.39    6.60
  -2  20  -3  101.59    6.50
   2  20   3  101.69    9.40
  -2  20  -3  111.99    7.30
   2  20   3  101.59    8.00
   2  20   3  109.39    6.40
  -2  20  -3  113.29    6.60
  -2  20  -3   97.99    7.00
   2  20   3  119.29    6.50
   2  20   3  106.49    6.90
  -2  20  -3   96.99    7.40
   4 -20   3   55.09    3.80
   4 -20   3   55.49    3.60
   4 -20   3   57.29    4.00
   4 -20   3   54.59    3.60
   4 -20   3   60.99    4.00
  -4 -20  -3   56.79    3.90
   4 -20   3   54.19    4.00
   4 -20   3   64.29    4.10
   4  20   3   56.59    3.50
  -4  20  -3   52.19    4.30
  -4  20  -3   62.29    4.00
  -4  20  -3   56.19    3.90
   6 -20   3   53.69    3.30
  -6 -20  -3   50.19    3.50
   6 -20   3   49.10    3.50
   6 -20   3   54.39    3.20
   6 -20   3   54.99    3.40
   6 -20   3   48.80    3.60
   6  20   3   52.69    3.40
   6  20   3   55.69    3.20
  -6  20  -3   51.89    3.40
  -7 -21   3   25.60    1.90
  -7 -21   3   26.00    1.70
   7 -21  -3   23.30    1.60
   7 -21  -3   24.30    1.70
   7 -21  -3   23.40    2.00
   7 -21  -3   24.60    1.60
  -7  21   3   26.60    2.20
  -7  21   3   21.50    2.10
  -7  21   3   23.50    2.20
  -7  21   3   24.00    2.20
  -5 -21   3  140.29    8.10
   5 -21  -3  143.69    7.80
  -5 -21   3  140.39    8.10
  -5 -21   3  140.59    7.90
   5 -21  -3  131.39    7.80
   5 -21  -3  119.99    8.20
   5 -21  -3  131.49    8.00
   5 -21  -3  123.59    7.70
   5  21  -3  149.99    7.90
   5  21  -3  126.79    8.90
  -5  21   3  133.29    8.60
  -5  21   3  145.89    8.70
  -5  21   3  145.79    8.40
   5  21  -3  137.19    7.90
  -5  21   3  140.99    8.50
   3 -21  -3   79.39    5.70
   3 -21  -3   82.29    5.20
   3 -21  -3   82.09    5.40
  -3 -21   3   91.29    6.40
   3 -21  -3   75.69    5.50
  -3 -21   3   90.19    5.40
  -3 -21   3   86.49    5.40
   3 -21  -3   78.19    5.00
  -3 -21   3   90.89    5.60
  -3 -21   3   88.69    5.40
   3 -21  -3   86.79    5.10
   3  21  -3   82.39    6.30
  -3  21   3   94.29    5.90
   3  21  -3   84.99    5.70
  -3  21   3   94.19    5.80
   3  21  -3   89.09    5.50
  -3  21   3  103.29    9.60
  -3  21   3   89.99    9.40
  -3  21   3   88.29    5.90
   3  21  -3   83.69    5.60
   3  21  -3   83.69    5.40
  -3  21   3   99.39    6.10
  -1 -21   3  282.47   15.40
   1 -21  -3  264.07   15.20
  -1 -21   3  268.27   15.20
  -1 -21   3  300.27   15.50
  -1 -21   3  256.17   15.70
   1 -21  -3  243.28   14.80
   1 -21  -3  275.07   16.00
  -1  21   3  268.57   15.40
  -1  21   3  253.27   17.40
  -1  21   3  282.17   15.90
   1  21  -3  292.27   15.30
  -1  21   3  296.77   19.30
  -1  21   3  285.67   15.60
  -1  21   3  235.08   18.70
   1  21  -3  275.87   16.30
  -1  21   3  244.88   16.30
   1  21  -3  270.37   15.20
   1  21  -3  242.98   16.30
   1  21  -3  249.68   17.80
   1  21  -3  247.28   17.10
   1  21  -3  285.37   15.40
   1  21  -3  280.07   15.60
  -1  21   3  274.27   15.20
  -1  21   3  255.27   17.10
   1  21  -3  246.28   18.10
  -1 -21  -3  264.47   15.20
  -1 -21  -3  268.27   16.30
   1 -21   3  292.97   15.60
   1 -21   3  275.97   15.40
   1 -21   3  272.77   15.10
   1 -21   3  284.87   15.60
   1 -21   3  260.17   15.40
  -1  21  -3  275.57   15.40
  -1  21  -3  262.47   16.10
   1  21   3  249.68   18.70
   1  21   3  269.07   15.40
  -1  21  -3  252.17   16.70
   1  21   3  283.37   15.20
  -1  21  -3  267.77   15.30
  -1  21  -3  247.08   17.60
   1  21   3  246.88   17.20
  -1  21  -3  263.07   15.20
   1  21   3  273.47   15.20
   1  21   3  274.87   15.30
  -1  21  -3  267.47   15.50
   1  21   3  281.77   15.90
  -3 -21  -3  302.07   17.00
   3 -21   3  288.97   17.10
   3 -21   3  272.07   16.90
   3  21   3  306.47   16.80
  -3  21  -3  294.17   17.70
  -3  21  -3  323.77   17.10
  -3  21  -3  320.57   17.00
   5 -21   3  194.88   10.70
   5 -21   3  177.78   10.70
  -5 -21  -3  179.18   10.80
   5 -21   3  183.98   10.90
   5 -21   3  193.38   10.50
   5 -21   3  182.58   10.80
   5  21   3  188.08   10.50
  -5  21  -3  195.88   10.80
   7 -21   3  137.69    7.50
   7 -21   3  134.49    7.40
  -7 -21  -3  126.89    7.80
   7 -21   3  118.39    7.50
   7 -21   3  125.79    7.60
   7  21   3  136.19    7.50
   7  21   3  142.79    7.40
   6 -22  -3   41.50    3.10
  -6 -22   3   47.00    2.90
   6 -22  -3   49.30    2.90
   6 -22  -3   48.60    2.80
  -6 -22   3   44.30    3.10
   6 -22  -3   46.50    2.80
  -6  22   3   49.00    3.30
  -6  22   3   46.00    3.40
   6  22  -3   46.60    2.80
   6  22  -3   45.10    2.80
  -6  22   3   45.20    3.40
   4 -22  -3   18.40    1.40
   4 -22  -3   17.50    1.70
  -4 -22   3   20.10    1.70
   4 -22  -3   17.30    1.90
  -4 -22   3   18.00    1.80
   4 -22  -3   19.30    1.30
  -4 -22   3   19.50    1.70
   4 -22  -3   20.30    1.60
   4  22  -3   18.30    1.80
   4  22  -3   17.70    2.20
   4  22  -3   18.50    1.80
   4  22  -3   18.70    1.60
   4  22  -3   17.40    1.60
  -2 -22   3  214.78   12.60
  -2 -22   3  189.18   11.20
  -2 -22   3  190.78   10.90
   2 -22  -3  183.38   11.00
  -2 -22   3  174.58   11.00
  -2 -22   3  192.68   11.00
   2 -22  -3  176.08   10.60
   2 -22  -3  191.38   10.80
  -2  22   3  198.18   11.30
  -2  22   3  195.78   17.20
   2  22  -3  190.88   11.10
  -2  22   3  198.68   11.30
  -2  22   3  195.18   11.80
   2  22  -3  181.38   11.20
   2  22  -3  184.88   11.30
   2  22  -3  186.08   12.00
   2  22  -3  184.58   11.00
  -2  22   3  207.38   11.20
  -2  22   3  199.98   11.40
   0 -22   3   90.29    5.40
   0 -22  -3   75.59    5.00
   0 -22   3   74.09    5.20
   0 -22   3   89.59    5.50
   0 -22  -3   77.59    5.90
   0 -22   3   83.39    5.50
   0 -22   3   80.89    4.80
   0  22   3   82.69    5.80
   0  22  -3   81.69    5.50
   0  22  -3   84.69    5.20
   0  22   3   91.69    5.40
   0  22  -3   83.59    5.40
   0  22   3   80.89    5.30
   0  22   3   88.59    5.30
   0  22  -3   80.19    6.00
   0  22  -3   84.19    5.40
   2 -22   3   80.39    5.40
   2 -22   3   86.89    5.10
   2 -22   3   88.59    5.60
  -2 -22  -3   87.39    5.30
   2 -22   3   79.59    5.50
  -2  22  -3   91.39    5.30
  -2  22  -3   85.99    6.10
   2  22   3   90.19    5.30
  -2  22  -3   87.89    5.40
   2  22   3   74.69    5.90
   2  22   3   82.59    5.20
  -2  22  -3   87.09    5.40
   2  22   3   88.09    5.20
   4 -22   3   23.60    1.70
  -4 -22  -3   19.10    1.80
   4 -22   3   22.20    2.00
   4 -22   3   22.30    1.80
   4 -22   3   21.70    1.90
   4 -22   3   18.50    1.90
  -4  22  -3   19.80    2.30
   4  22   3   22.80    1.50
  -4  22  -3   24.10    2.00
   6 -22   3   29.90    1.80
   6 -22   3   25.30    2.00
   6 -22   3   30.10    1.90
   6 -22   3   26.70    2.00
  -6 -22  -3   24.50    2.00
   6  22   3   24.10    1.80
   6  22   3   29.70    2.00
  -5 -23   3   26.60    2.00
   5 -23  -3   24.60    2.00
   5 -23  -3   30.00    2.00
  -5 -23   3   27.60    2.00
  -5 -23   3   26.00    1.90
   5 -23  -3   28.60    1.80
  -5  23   3   27.50    2.30
  -5  23   3   25.10    2.30
  -5  23   3   31.90    2.50
   5  23  -3   31.90    1.90
  -5  23   3   24.40    2.30
  -3 -23   3   22.00    1.80
   3 -23  -3   19.30    1.80
   3 -23  -3   19.60    1.40
  -3 -23   3   21.50    1.80
  -3 -23   3   19.70    1.70
   3 -23  -3   20.20    1.50
   3 -23  -3   18.00    1.60
  -3 -23   3   22.70    1.90
   3  23  -3   19.10    1.80
   3  23  -3   18.70    1.90
  -3  23   3   24.80    2.30
  -3  23   3   22.80    2.10
  -3  23   3   18.80    2.20
   3  23  -3   20.60    2.40
  -3  23   3   20.40    2.10
   3  23  -3   18.00    1.90
   3  23  -3   20.40    1.70
  -1 -23   3   11.80    1.80
  -1 -23   3    9.40    1.00
  -1 -23   3   10.00    1.30
  -1 -23   3   11.70    1.50
   1 -23  -3    8.80    1.00
   1 -23  -3    7.60    1.20
  -1  23   3   11.20    1.50
  -1  23   3   10.50    1.50
  -1  23   3    7.30    1.40
  -1  23   3   10.80    1.80
  -1  23   3    9.70    1.40
   1  23  -3   11.60    2.10
   1  23  -3    6.90    1.20
   1  23  -3    7.40    1.30
  -1 -23  -3   81.79    4.90
   1 -23   3   74.79    5.10
   1 -23   3   66.49    5.00
   1  23   3   69.19    5.30
  -1  23  -3   84.69    5.10
  -1  23  -3   84.89    5.10
  -1  23  -3   79.69    5.70
  -1  23  -3   79.99    4.80
   1  23   3   80.19    4.90
  -1  23  -3   79.69    5.10
   1  23   3   74.29    4.90
  -3 -23  -3   15.60    1.50
   3 -23   3   16.00    1.50
   3 -23   3   19.00    1.70
   3 -23   3   16.90    1.70
   3  23   3   17.60    1.40
  -3  23  -3   15.60    1.90
  -3  23  -3   16.80    1.70
  -3  23  -3   17.00    1.70
  -3  23  -3   14.30    1.90
   5 -23   3   34.70    2.50
  -5 -23  -3   35.60    2.40
   5 -23   3   29.00    2.30
   5 -23   3   34.50    2.20
   5  23   3   32.10    2.30
  -5  23  -3   38.40    2.40
   4 -24  -3   61.79    4.00
  -4 -24   3   77.89    4.40
  -4 -24   3   68.79    4.30
  -4  24   3   76.49    4.50
   4  24  -3   64.39    4.20
   4  24  -3   68.29    4.20
  -4  24   3   76.29    4.50
   4  24  -3   71.59    4.20
  -4  24   3   65.69    4.50
   2 -24  -3  156.58    8.70
   2 -24  -3  146.89    8.90
   2 -24  -3  150.28    8.70
  -2 -24   3  145.39    8.70
  -2 -24   3  147.29    9.10
  -2  24   3  165.88    9.10
   2  24  -3  159.08    8.90
   2  24  -3  144.99    9.70
   2  24  -3  164.08    8.90
   2  24  -3  156.38    9.10
  -2  24   3  159.78    8.90
  -2  24   3  146.99    9.10
  -2  24   3  151.68    9.00
   2  24  -3  148.99    9.20
   0 -24  -3   74.89    5.00
   0 -24   3   82.39    5.20
   0 -24   3   84.59    5.20
   0 -24   3   83.19    5.20
   0 -24  -3   77.59    4.90
   0  24  -3   76.79    5.20
   0  24   3   81.79    5.00
   0  24   3   89.19    5.10
   0  24  -3   78.69    4.90
   0  24   3   79.99    5.20
   0  24  -3   71.19    5.70
   0  24   3   81.99    5.00
   0  24  -3   84.99    5.20
  -2 -24  -3  158.98    9.70
   2 -24   3  177.48   10.00
   2 -24   3  167.78    9.60
  -2 -24  -3  166.08    9.70
   2 -24   3  177.48   10.00
   2  24   3  178.68    9.60
  -2  24  -3  168.58    9.90
  -2  24  -3  170.88    9.80
  -2  24  -3  165.58    9.80
  -2  24  -3  162.88    9.60
  -4 -24  -3   30.10    2.00
   4 -24   3   22.60    2.10
   4 -24   3   24.90    1.90
  -4 -24  -3   30.70    2.10
  -4  24  -3   30.20    2.10
   4  24   3   25.20    1.80
  -4  24  -3   26.70    2.20
  -4  24  -3   30.70    2.10
  -5 -25   3    0.10    0.40
  -5  25   3    0.50    0.50
  -5  25   3    0.10    0.60
  -5  25   3    0.40    0.40
   5  25  -3    0.40    0.30
  -3 -25   3   18.50    1.70
  -3 -25   3   21.50    1.80
   3 -25  -3   19.80    1.70
  -3 -25   3   17.50    1.50
   3 -25  -3   21.80    1.40
   3  25  -3   18.70    1.60
   3  25  -3   19.90    1.50
  -3  25   3   21.50    1.80
  -3  25   3   18.10    1.70
  -3  25   3   19.20    1.70
   3  25  -3   18.50    1.70
  -1 -25   3  110.99    6.80
   1 -25  -3  112.49    6.50
  -1 -25   3  105.69    6.90
   1 -25  -3  113.29    6.80
  -1 -25   3  109.79    6.80
  -1  25   3  122.19    6.70
   1  25  -3  108.09    6.90
   1  25  -3  114.69    6.90
  -1  25   3  121.79    6.80
  -1  25   3  104.39    6.80
   1  25  -3  120.19    6.70
  -1  25   3  114.09    6.70
   1  25  -3  121.79    6.80
  -1 -25  -3  100.89    6.20
   1 -25   3  109.09    6.50
   1 -25   3  103.69    6.30
  -1 -25  -3  101.69    6.30
   1 -25   3  104.29    6.50
  -1  25  -3  107.79    6.40
   1  25   3  111.59    6.20
   1  25   3  106.49    6.10
  -1  25  -3  104.79    6.50
  -1  25  -3  104.79    6.20
  -3 -25  -3   11.70    1.10
   3 -25   3   12.40    1.30
  -3 -25  -3   12.10    1.10
   3 -25   3    9.00    1.10
   3  25   3   10.80    1.00
   3  25   3   10.50    0.80
  -3  25  -3   10.90    1.20
  -3  25  -3   11.00    1.00
  -3  25  -3    8.50    1.40
  -3  25  -3   12.60    1.30
   4 -26  -3   81.59    5.10
  -4  26   3   99.09    5.20
  -4  26   3   83.99    5.20
  -2 -26   3   35.70    2.50
   2 -26  -3   37.80    2.60
   2 -26  -3   36.80    2.40
  -2 -26   3   37.20    2.70
  -2 -26   3   39.30    2.70
   2 -26  -3   33.40    2.20
  -2  26   3   42.90    2.60
  -2  26   3   42.50    2.60
  -2  26   3   38.70    2.60
   2  26  -3   37.60    2.60
   2  26  -3   35.80    2.60
   2  26  -3   36.70    2.50
   0 -26   3   70.99    4.40
   0 -26  -3   71.19    4.20
   0 -26  -3   62.99    4.00
   0 -26   3   66.79    4.30
   0 -26   3   74.09    4.20
   0  26   3   67.59    4.10
   0  26  -3   69.39    4.20
   0  26  -3   64.79    4.10
   0  26  -3   66.59    4.30
   0  26   3   66.69    4.10
   0  26  -3   62.49    4.30
   2 -26   3   31.10    2.50
  -2 -26  -3   39.80    2.50
   2 -26   3   34.40    2.50
  -2  26  -3   35.50    2.30
  -2  26  -3   37.20    2.60
   1 -27  -3   44.90    2.90
  -1 -27   3   46.50    2.90
  -1 -27   3   45.80    2.90
   1 -27  -3   44.60    3.00
  -1 -27   3   46.10    3.10
   1 -27  -3   43.80    2.60
  -1  27   3   47.50    2.90
   1  27  -3   45.70    2.80
   1  27  -3   48.10    3.00
  -1  27   3   48.70    2.90
   1  27  -3   44.00    3.00
   1 -27   3   32.20    2.40
  -1 -27  -3   35.00    2.40
  -1 -27  -3   34.10    2.20
   1 -27   3   32.20    2.40
   1  27   3   36.40    2.20
  -1  27  -3   33.90    2.40
  -1  27  -3   34.70    2.20
  -1  27  -3   35.20    2.40
 -10   0   4   82.89    5.90
 -10   0   4   85.29    6.40
  10   0  -4   75.49    5.50
  10   0  -4   81.89    4.70
  10   0  -4   83.69    4.80
  10   0  -4   70.69    4.70
  -8   0   4  120.29   11.90
  -8   0   4  135.89    8.70
  -8   0   4  131.79    9.30
   8   0  -4  135.39    7.90
   8   0  -4  151.68    8.70
   8   0  -4  147.29    8.70
  -8   0   4  122.69    8.80
  -8   0   4  130.19   10.50
   6   0  -4  844.42   47.00
  -6   0   4  876.81   49.20
  -6   0   4  766.02   47.40
  -4   0   4   30.40    2.80
   4   0  -4   39.20    2.30
  -4   0   4   33.90    2.70
  -4   0   4   29.80    2.70
  -4   0   4   34.50    3.00
  -4   0   4   35.70    4.10
  -2   0   4  998.80   56.79
   0   0   4   69.99    5.30
  -2   0  -4  153.28    8.90
  -2   0  -4  167.58   12.10
   6   0   4  354.96   18.10
   6   0   4  322.27   17.90
   6   0   4  342.07   18.40
  -6   0  -4  327.77   19.70
   6   0   4  322.67   18.90
   6   0   4  305.47   21.80
  -6   0  -4  313.37   17.90
   6   0   4  278.57   19.30
   6   0   4  336.07   19.00
   8   0   4  503.95   25.40
  -8   0  -4  490.45   28.60
  -8   0  -4  421.56   25.40
  -8   0  -4  444.76   27.50
  -8   0  -4  451.95   25.90
  10   0   4  113.79    6.70
  10   0   4  114.79    7.10
  10   0   4  107.59    7.70
  10   0   4  114.49    6.50
  10   0   4  119.29    6.70
  11  -1  -4    7.30    0.80
  11  -1  -4    7.50    1.00
  11  -1  -4    6.00    1.30
  11  -1  -4    7.70    0.80
  11   1  -4    9.00    1.00
  11   1  -4    6.80    0.70
   9  -1  -4   16.00    2.30
  -9  -1   4    7.40    6.20
  -9  -1   4   19.60    3.40
   9  -1  -4   15.90    1.40
   9  -1  -4   18.10    2.30
  -9  -1   4   22.50    7.10
  -9  -1   4   16.80    2.70
  -9  -1   4   14.30    2.70
   9  -1  -4   17.20    1.60
  -9  -1   4   20.10    2.40
   9  -1  -4   13.20    1.60
   9   1  -4   17.50    2.30
  -9   1   4   14.20    3.30
  -9   1   4   18.90    2.70
  -9   1   4   19.80    2.80
   9   1  -4   18.00    2.20
   9   1  -4   16.00    1.50
   9   1  -4   14.20    1.40
   7  -1  -4   11.50    1.60
  -7  -1   4   10.80    2.10
  -7  -1   4   13.00    1.90
  -7  -1   4   14.80    2.10
   7  -1  -4   10.50    1.30
  -7  -1   4   15.70    4.00
  -7  -1   4   14.30    3.20
  -7   1   4   17.70    3.60
   7   1  -4   12.00    1.60
  -7   1   4   11.90    2.20
  -7   1   4   15.00    4.10
  -7   1   4   13.70    2.20
  -7   1   4   13.50    1.90
  -5  -1   4   50.49    4.10
  -5  -1   4   50.09    3.80
  -5  -1   4   53.49    4.00
  -5  -1   4   58.69    5.70
  -5  -1   4   60.99    5.10
  -5   1   4   50.09    4.10
  -5   1   4   51.39    4.80
   5   1  -4   53.39    3.70
  -5   1   4   50.49    5.60
  -5   1   4   53.99    3.90
   5   1  -4   49.20    3.80
   5   1  -4   57.99    4.50
  -5   1   4   56.29    3.90
   5   1  -4   51.49    4.30
   3  -1  -4  148.69    8.50
  -3  -1   4  141.39   10.00
  -3  -1   4  134.99    9.10
   3  -1  -4  142.69    8.30
  -3  -1   4  130.99   10.90
  -3  -1   4  140.79    8.50
   3  -1  -4  153.78    8.90
  -3  -1   4  147.29    8.80
   3  -1  -4  134.49    8.10
   3  -1  -4  141.69    8.80
  -3   1   4  128.69    8.60
   3   1  -4  148.09    8.90
   3   1  -4  148.99    8.60
  -3   1   4  132.59    9.10
  -3   1   4  139.19    8.50
  -3   1   4  160.38   11.70
   3   1  -4  152.48    8.90
   3   1  -4  148.79    8.30
  -3   1   4  143.69   10.30
   3   1  -4  139.69    8.10
   1  -1  -4   10.70    1.20
   1  -1  -4    8.80    0.90
  -1  -1   4    8.20    2.20
   1  -1  -4    8.90    0.80
  -1  -1   4   10.40    2.40
   1  -1  -4    8.60    0.80
   1   1  -4    8.20    0.80
  -1   1   4    6.40    1.10
  -1   1   4    7.40    1.10
   1   1  -4    9.90    0.80
   1   1  -4    8.10    1.10
  -1   1   4    9.10    1.90
  -1   1   4    7.90    2.60
   1   1  -4    9.20    1.00
   1  -1   4  779.72   43.20
   3  -1   4  134.09    7.70
  -3  -1  -4  109.89    7.50
  -3  -1  -4  129.59    7.30
  -3  -1  -4  126.79    7.50
  -3  -1  -4  115.19    7.00
  -3   1  -4  131.29    7.40
  -3   1  -4  128.79   10.50
   5  -1   4   35.10    2.60
   5  -1   4   34.70    2.40
  -5  -1  -4   28.50    2.90
   5  -1   4   37.90    5.00
  -5  -1  -4   31.30    3.10
   5  -1   4   36.50    3.10
  -5  -1  -4   30.90    2.20
   5  -1   4   35.10    2.30
   5   1   4   34.00    2.50
   5   1   4   36.70    2.70
  -5   1  -4   32.00    2.10
   5   1   4   34.60    4.80
   5   1   4   40.00    3.20
   5   1   4   31.80    2.30
  -5   1  -4   41.60    3.00
  -5   1  -4   37.40    3.00
   5   1   4   36.30    2.40
   5   1   4   30.80    4.60
  -7  -1  -4    8.40    2.50
   7  -1   4    7.90    3.50
   7  -1   4    8.20    1.10
  -7  -1  -4   10.60    1.00
  -7  -1  -4   11.90    2.70
   7  -1   4    8.60    1.30
   7  -1   4   10.40    1.30
   7  -1   4    7.70    1.00
   7  -1   4   10.60    2.20
   7  -1   4    8.40    1.20
   7   1   4    7.10    1.00
  -7   1  -4   10.50    2.60
  -7   1  -4    9.30    1.10
   7   1   4    8.70    1.20
   7   1   4    8.40    1.20
  -7   1  -4   13.20    2.90
   7   1   4    7.60    1.40
   7   1   4    6.60    3.30
   9  -1   4   19.70    1.60
   9  -1   4   20.20    2.10
   9  -1   4   22.60    1.80
  -9  -1  -4   16.00    2.10
   9  -1   4   22.60    1.80
   9  -1   4   23.60    3.00
   9   1   4   23.20    1.90
  -9   1  -4   20.70    2.90
  -9   1  -4   20.10    2.10
   9   1   4   17.60    2.00
  -9   1  -4   18.20    1.80
   9   1   4   23.60    1.70
 -11  -1  -4    2.80    0.70
  11  -1   4    2.50    0.60
  11  -1   4    1.50    0.90
  11  -1   4    2.30    0.70
  11  -1   4    3.60    0.60
 -10  -2   4   23.70    3.10
  10  -2  -4   27.40    1.90
 -10  -2   4   26.20    3.10
  10  -2  -4   22.40    1.70
  10  -2  -4   21.80    2.30
  10   2  -4   23.40    1.90
 -10   2   4   27.20    3.20
 -10   2   4   27.90    3.20
  10   2  -4   20.30    1.70
  10   2  -4   19.80    2.40
  -8  -2   4   37.70    3.60
  -8  -2   4   37.20    3.70
  -8  -2   4   31.70    4.60
  -8  -2   4   34.90    5.60
   8  -2  -4   47.10    2.70
  -8  -2   4   38.70    4.00
  -8   2   4   36.50    3.80
  -8   2   4   36.30    4.60
  -8   2   4   39.60    4.00
   8   2  -4   44.70    3.40
  -8   2   4   41.20    6.20
   8   2  -4   47.90    3.60
   6  -2  -4  202.98   13.20
  -6  -2   4  236.88   16.50
  -6  -2   4  246.48   14.10
  -6  -2   4  215.58   15.30
  -6  -2   4  224.38   13.50
  -6  -2   4  235.88   14.20
  -6   2   4  249.97   13.80
  -6   2   4  236.88   15.20
   6   2  -4  224.28   13.60
  -6   2   4  246.68   17.00
  -6   2   4  241.08   14.20
  -6   2   4  239.18   13.70
   6   2  -4  237.08   14.60
   4  -2  -4  734.33   40.10
   4  -2  -4  716.23   40.40
  -4  -2   4  706.73   41.10
  -4   2   4  748.13   40.70
   2  -2  -4 2295.57  133.69
   2   2  -4 2394.76  135.49
   0  -2   4  533.45   28.20
   0   2   4  453.85   27.60
   0   2   4  533.85   29.40
   0   2   4  477.85   27.60
  -2  -2  -4   95.19    5.40
  -2  -2  -4  103.39    5.70
   2   2   4   85.99    6.70
  -2   2  -4  102.29    5.70
  -2   2  -4  102.79    5.50
   2   2   4   83.59    5.70
  -2   2  -4   85.39    5.80
  -4  -2  -4  385.86   22.40
  -4   2  -4  407.06   26.50
   6  -2   4  270.57   17.10
   6  -2   4  289.77   16.40
   6  -2   4  289.97   16.80
   6  -2   4  317.77   16.40
  -6  -2  -4  294.67   16.10
   6  -2   4  265.87   17.60
   6  -2   4  306.97   17.50
   6  -2   4  287.67   20.20
   6  -2   4  299.17   16.20
   6   2   4  258.67   20.00
  -6   2  -4  285.97   16.10
   6   2   4  312.97   16.70
  -6   2  -4  281.17   17.60
   6   2   4  288.27   17.10
   6   2   4  321.47   16.30
   6   2   4  277.47   16.20
  -8  -2  -4  396.26   22.10
   8  -2   4  374.66   21.20
   8  -2   4  402.26   21.40
  -8  -2  -4  373.96   23.60
  -8  -2  -4  335.17   24.30
   8  -2   4  424.16   21.60
   8  -2   4  401.36   22.10
  -8  -2  -4  377.46   21.50
  -8   2  -4  370.26   23.70
   8   2   4  372.16   21.40
   8   2   4  386.76   21.60
   8   2   4  418.96   21.80
   8   2   4  402.36   22.80
 -10  -2  -4   50.89    3.60
 -10  -2  -4   49.40    4.00
  10  -2   4   58.39    4.70
  10  -2   4   59.59    3.90
 -10   2  -4   53.89    3.60
  10   2   4   51.39    3.30
  10   2   4   50.69    3.40
  10   2   4   63.69    3.60
  11  -3  -4   42.00    2.60
  11  -3  -4   41.60    3.20
  11  -3  -4   45.30    2.80
  11   3  -4   45.00    2.60
  11   3  -4   44.40    2.50
  11   3  -4   43.10    2.70
  11   3  -4   38.10    3.30
   9  -3  -4   47.70    3.40
  -9  -3   4   57.69    4.90
   9  -3  -4   58.49    4.30
   9  -3  -4   45.60    3.20
  -9  -3   4   58.79    8.40
  -9  -3   4   50.49    4.50
   9  -3  -4   51.89    4.30
  -9  -3   4   53.99    4.50
   9  -3  -4   51.69    3.40
   9   3  -4   50.79    4.00
  -9   3   4   57.49    5.70
  -9   3   4   53.39    4.70
  -9   3   4   58.99    5.00
   7  -3  -4   65.29    4.20
  -7  -3   4   63.59    5.40
  -7  -3   4   66.79    6.70
  -7  -3   4   76.39    7.90
   7  -3  -4   63.59    4.40
  -7  -3   4   73.69    5.50
  -7  -3   4   62.89    5.00
  -7   3   4   56.89   10.20
   7   3  -4   79.59    6.10
  -7   3   4   73.49    6.50
  -7   3   4   81.09    5.70
   7   3  -4   77.39    5.10
  -7   3   4   87.49    8.70
  -7   3   4   75.29    5.10
  -5  -3   4  345.57   19.50
  -5  -3   4  309.37   18.90
  -5  -3   4  321.97   18.50
  -5  -3   4  314.97   20.10
  -5  -3   4  367.96   21.30
  -5  -3   4  330.07   19.00
   5   3  -4  296.27   19.10
  -5   3   4  312.67   19.00
  -5   3   4  332.97   18.70
  -5   3   4  327.17   19.90
  -5   3   4  340.47   21.70
  -5   3   4  367.66   24.10
   5   3  -4  337.07   19.60
   5   3  -4  301.07   18.80
  -3   3   4  810.32   48.00
  -1  -3   4   40.20    2.80
   1  -3  -4   40.60    2.90
  -1  -3   4   32.10    3.20
  -1  -3   4   31.10    3.40
   1  -3  -4   36.50    2.30
  -1  -3   4   35.10    2.60
  -1   3   4   32.00    2.80
  -1   3   4   32.50    2.90
   1   3  -4   38.40    2.70
   1   3  -4   34.20    2.50
   1   3  -4   35.10    2.30
   1   3  -4   38.10    2.40
   1   3  -4   38.10    2.80
  -1   3   4   40.80    2.90
   1   3   4  652.73   38.70
   1   3   4  706.53   38.00
  -3   3  -4  508.95   28.60
   3   3   4  493.45   29.00
  -3   3  -4  552.64   28.40
   5  -3   4  782.92   45.60
  -5  -3  -4  799.42   45.30
   5  -3   4  801.32   47.50
   5  -3   4  857.31   44.20
   5   3   4  806.32   48.00
   7  -3   4  305.77   16.30
   7  -3   4  284.97   16.10
  -7  -3  -4  309.87   18.40
   7  -3   4  303.27   16.70
   7  -3   4  287.77   16.30
  -7  -3  -4  309.37   16.50
  -7  -3  -4  300.47   19.20
  -7  -3  -4  282.17   16.10
   7  -3   4  277.07   17.60
   7   3   4  301.37   16.40
   7   3   4  309.47   16.80
  -7   3  -4  263.07   17.90
   7   3   4  287.87   16.20
   7   3   4  275.07   16.10
  -7   3  -4  250.67   16.10
  -7   3  -4  286.57   17.80
   7   3   4  288.57   17.20
   9  -3   4  154.38    8.00
   9  -3   4  133.59    8.10
  -9  -3  -4  125.49    8.10
   9  -3   4  124.79    9.40
  -9  -3  -4  139.09    8.80
  -9   3  -4  135.29    8.10
  -9   3  -4  139.69    8.60
   9   3   4  142.39    9.20
   9   3   4  149.39    8.20
   9   3   4  155.98    8.00
   9   3   4  127.19    8.50
 -11  -3  -4   45.30    2.80
  11  -3   4   41.20    2.60
  11  -3   4   42.10    2.90
  11   3   4   37.70    2.60
  11   3   4   44.40    2.60
  11   3   4   39.70    2.90
  10  -4  -4   88.49    5.00
  10  -4  -4   79.99    5.10
 -10  -4   4   92.49    6.50
 -10  -4   4   83.89    6.10
  10  -4  -4   77.09    5.90
  10  -4  -4   94.99    5.70
  10  -4  -4   86.79    5.00
 -10   4   4   91.99    6.40
  10   4  -4   82.59    5.00
 -10   4   4   95.49    6.70
  10   4  -4   79.79    5.80
  -8  -4   4  132.79    8.00
   8  -4  -4  127.39    7.00
   8  -4  -4  113.89    7.90
  -8  -4   4  118.19    8.40
   8  -4  -4  118.29    7.10
   8  -4  -4  111.99    7.90
  -8  -4   4  128.49    8.60
  -8  -4   4  109.39    9.90
   8  -4  -4  116.19    7.20
  -8  -4   4  120.59   11.40
  -8   4   4  126.69    8.20
   8   4  -4  124.19    7.80
  -8   4   4  125.69    8.70
  -8   4   4  120.59    9.60
  -6  -4   4  439.46   26.20
  -6  -4   4  380.76   23.40
   6  -4  -4  370.06   22.40
   6  -4  -4  396.26   22.30
  -6  -4   4  426.36   25.20
  -6  -4   4  396.86   23.60
  -6   4   4  409.56   24.60
  -6   4   4  414.46   26.90
  -6   4   4  436.76   23.70
  -6   4   4  424.16   29.50
   6   4  -4  374.86   22.20
   6   4  -4  438.76   24.40
   6   4  -4  415.36   23.10
  -6   4   4  393.76   22.90
  -4  -4   4  554.14   32.20
  -4  -4   4  574.54   32.60
   4  -4  -4  528.25   32.30
  -4  -4   4  601.74   33.40
   4  -4  -4  522.75   31.90
   4   4  -4  597.94   32.80
   4   4  -4  570.04   32.20
  -4   4   4  626.04   36.80
  -4   4   4  642.84   35.40
  -2  -4   4  545.55   29.40
  -2   4   4  558.84   32.00
  -2   4   4  466.25   31.70
   0   4   4  459.15   25.90
   0   4   4  495.35   26.10
   0   4   4  426.96   27.70
   0   4   4  477.85   25.90
  -4  -4  -4   24.00    1.80
  -4  -4  -4   22.80    2.40
  -4  -4  -4   26.20    2.40
  -4  -4  -4   25.40    1.80
  -4  -4  -4   27.30    2.70
  -4   4  -4   23.70    1.90
   4   4   4   28.40    2.70
  -4   4  -4   28.90    1.90
  -4   4  -4   27.00    1.70
   6  -4   4   81.49    6.00
   6  -4   4   80.39    5.10
   6  -4   4   72.89    5.10
   6  -4   4   73.19    4.50
   6  -4   4   69.09    4.60
  -6  -4  -4   88.89    7.00
  -6  -4  -4   82.69    4.60
   6  -4   4   71.59    4.70
   6  -4   4   71.39    5.50
   6  -4   4   69.29    5.70
  -6  -4  -4   83.59    6.40
   6  -4   4   73.89    4.90
   6  -4   4   75.89    4.90
   6   4   4   64.49    7.70
   6   4   4   75.89    4.70
   6   4   4   76.09    5.00
   6   4   4   77.59    4.60
   6   4   4   74.79    4.80
   6   4   4   73.59    5.70
  -6   4  -4   79.89    5.70
   6   4   4   71.59    5.30
   8  -4   4   89.29    5.50
   8  -4   4   95.29    5.90
  -8  -4  -4  100.59    5.80
   8  -4   4   99.39    5.90
  -8  -4  -4  102.59    6.40
   8  -4   4  102.99    5.80
   8  -4   4   91.89    5.60
  -8  -4  -4   90.59    8.60
   8  -4   4   92.19    5.60
   8  -4   4   92.69    6.20
  -8  -4  -4  103.59    7.80
   8  -4   4   94.29    7.40
   8   4   4   95.19    6.30
  -8   4  -4  101.89    7.40
   8   4   4   95.99    5.70
   8   4   4   92.79    5.80
   8   4   4   93.19    5.90
  -8   4  -4   96.59    6.00
   8   4   4   88.19    6.70
  10  -4   4   27.70    2.00
  10  -4   4   26.40    3.10
  10  -4   4   27.60    2.10
 -10  -4  -4   33.70    2.30
 -10  -4  -4   31.80    2.70
  10  -4   4   30.30    2.00
  10  -4   4   28.80    2.40
 -10   4  -4   32.20    2.50
  10   4   4   30.20    2.20
  10   4   4   29.10    2.10
  10   4   4   24.40    2.80
 -10   4  -4   27.70    2.20
  10   4   4   26.30    1.90
  11  -5  -4   81.29    4.60
  11  -5  -4   81.39    4.60
  11  -5  -4   79.09    4.70
  11   5  -4   85.49    4.70
  11   5  -4   80.09    4.50
  11   5  -4   71.39    5.20
  11   5  -4   85.39    4.70
 -11   5   4   83.09    5.90
   9  -5  -4  467.05   26.30
  -9  -5   4  467.35   27.00
  -9  -5   4  476.35   26.30
   9  -5  -4  437.86   25.30
   9  -5  -4  435.46   25.50
  -9   5   4  481.35   26.60
  -9   5   4  455.05   27.20
   9   5  -4  486.85   26.30
  -7  -5   4  435.86   23.90
   7  -5  -4  382.76   22.50
   7  -5  -4  444.76   22.40
  -7  -5   4  375.16   23.80
  -7  -5   4  420.86   25.90
  -7  -5   4  441.56   23.10
   7  -5  -4  357.36   23.20
   7  -5  -4  371.76   22.40
   7  -5  -4  380.16   23.20
  -7  -5   4  451.85   27.30
  -7   5   4  426.66   28.30
  -7   5   4  421.36   25.10
  -7   5   4  413.66   24.00
   7   5  -4  390.96   23.20
   7   5  -4  415.36   24.60
  -5  -5   4  938.31   56.19
  -5  -5   4 1062.19   57.39
   5   5  -4  950.10   56.29
   5   5  -4  980.70   55.79
  -5   5   4 1139.09   59.99
  -3   5   4  811.02   43.30
  -3   5   4  734.83   46.30
  -1   5   4 1164.88   66.39
   1  -5   4 2446.86  136.89
   1   5   4 2477.05  151.68
   3   5   4 1299.77   84.19
   5  -5   4  747.13   43.10
   5  -5   4  695.63   44.80
   5  -5   4  745.23   42.90
   5  -5   4  828.22   42.20
  -5  -5  -4  782.82   43.30
   5  -5   4  829.12   41.90
   5  -5   4  761.62   42.10
   5   5   4  730.33   45.60
   7  -5   4  150.28    8.50
   7  -5   4  150.48    8.70
   7  -5   4  141.79    8.10
   7  -5   4  143.39    8.10
   7  -5   4  138.99    8.30
   7  -5   4  134.19    9.80
   7  -5   4  147.49    8.30
   7  -5   4  128.59    8.00
  -7   5  -4  144.49    8.10
   7   5   4  143.69    8.30
   7   5   4  136.99    9.10
   7   5   4  137.39    8.20
   7   5   4  141.49    8.70
   7   5   4  142.29    8.40
   9  -5   4  713.53   38.20
   9  -5   4  673.33   39.80
   9  -5   4  650.43   37.90
  -9  -5  -4  749.53   39.10
  -9  -5  -4  709.93   40.30
  10  -6  -4   34.00    2.20
  10  -6  -4   35.60    3.00
  10  -6  -4   31.80    3.00
  10  -6  -4   33.30    2.40
  10  -6  -4   36.00    2.30
 -10  -6   4   31.40    3.30
 -10  -6   4   36.30    3.30
 -10   6   4   37.10    4.00
 -10   6   4   36.30    3.70
  10   6  -4   34.30    2.30
  10   6  -4   31.90    2.90
  -8  -6   4  125.69    9.00
   8  -6  -4  132.69    7.40
  -8  -6   4  135.39    8.90
  -8  -6   4  126.69   10.70
  -8  -6   4  133.79   12.00
   8  -6  -4  121.39    7.60
   8  -6  -4  122.09    8.40
   8  -6  -4  127.19    7.60
  -8  -6   4  142.49    8.40
  -8   6   4  128.89   10.00
  -8   6   4  138.89    8.80
  -8   6   4  142.49   13.80
   8   6  -4  120.89    9.50
  -8   6   4  128.89    9.10
   8   6  -4  122.39    8.30
  -6  -6   4   20.80    3.20
  -6  -6   4   13.90    1.80
   6  -6  -4   14.60    1.30
  -6  -6   4   12.30    2.00
   6  -6  -4   16.20    1.50
  -6  -6   4   13.70    3.40
  -6  -6   4   18.80    2.20
  -6  -6   4   15.80    2.30
   6  -6  -4   15.60    1.50
  -6   6   4   15.40    6.70
  -6   6   4   17.50    4.90
   6   6  -4   17.20    1.90
  -6   6   4   16.20    2.30
   6   6  -4   15.50    2.40
  -6   6   4   14.80    2.50
   6   6  -4   15.00    1.20
  -6   6   4   16.40    2.70
  -4  -6   4  102.49    6.80
  -4  -6   4   96.69    7.60
  -4  -6   4  112.39    6.50
  -4  -6   4  113.09    8.40
   4  -6  -4  109.79    6.60
  -4  -6   4  106.59    7.10
   4   6  -4  105.49    6.90
  -4   6   4  104.59    7.10
   4   6  -4  108.39    6.70
   4   6  -4  103.19    7.30
  -4   6   4  117.19   10.10
  -4   6   4  112.09    7.70
   4   6  -4   99.19    6.30
   4   6  -4  121.19    7.70
  -4   6   4  101.99   10.80
  -4   6   4  113.49    7.00
   4   6  -4  101.69    6.30
  -2  -6   4   11.50    1.40
  -2  -6   4   11.90    2.00
   2  -6  -4    6.90    1.20
   2  -6  -4    8.80    1.10
   2  -6  -4    7.90    1.10
  -2  -6   4   12.00    1.40
  -2  -6   4   11.50    1.40
   2   6  -4   10.50    1.10
  -2   6   4   10.80    1.90
  -2   6   4    9.90    1.70
  -2   6   4   11.90    1.70
   2   6  -4    7.90    0.90
   2   6  -4    8.70    1.20
  -2   6   4   11.50    3.60
   2   6  -4   11.80    1.50
  -2   6   4   10.90    4.40
   2   6  -4   10.20    1.40
   0   6   4  696.93   41.00
   0   6   4  656.53   38.20
   0   6   4  745.53   38.80
   2   6   4 1750.32  113.69
  -4  -6  -4    6.50    1.60
  -4  -6  -4    7.50    1.70
  -4  -6  -4    5.90    0.80
  -4  -6  -4    8.40    1.70
  -4  -6  -4    6.70    0.80
  -4   6  -4    5.60    1.30
  -4   6  -4    6.10    0.50
  -4   6  -4    6.50    0.70
   4   6   4    8.70    1.60
   6  -6   4  170.28   10.30
  -6  -6  -4  183.88   13.00
  -6  -6  -4  183.38   12.30
   6  -6   4  187.58   11.90
   6  -6   4  168.18   10.00
  -6  -6  -4  184.18   12.10
   6  -6   4  182.78   11.60
   6  -6   4  191.98   10.40
   6  -6   4  178.68   10.60
   6  -6   4  185.68   10.20
  -6  -6  -4  168.18   10.20
  -6  -6  -4  180.38   10.50
   6  -6   4  177.18   11.30
   6  -6   4  177.08   10.70
   6   6   4  187.18   10.30
   6   6   4  181.88   10.70
   6   6   4  168.68   10.20
   6   6   4  197.68   10.50
   6   6   4  173.78   10.90
  -8  -6  -4   10.90    1.60
   8  -6   4    8.50    1.10
   8  -6   4    7.40    2.20
   8  -6   4    8.40    1.10
   8  -6   4    8.60    1.10
  -8  -6  -4   13.00    2.80
   8  -6   4    9.50    1.50
   8  -6   4    9.50    1.40
   8  -6   4    8.00    1.30
  -8  -6  -4    7.90    2.50
   8   6   4    8.60    1.90
   8   6   4   10.30    1.30
   8   6   4    8.90    1.10
   8   6   4   10.50    1.60
   8   6   4    9.40    1.20
  10  -6   4   22.40    2.90
 -10  -6  -4   26.40    2.10
  10  -6   4   29.00    1.90
  10  -6   4   30.20    2.30
 -10  -6  -4   27.30    2.60
  10  -6   4   27.90    1.90
  10  -6   4   28.30    2.10
  10   6   4   27.00    2.00
  10   6   4   29.10    2.00
  10   6   4   29.40    2.30
  10   6   4   23.30    2.60
  11  -7  -4   89.59    4.90
  11  -7  -4   82.99    5.00
  11  -7  -4   89.19    4.90
  11  -7  -4   89.69    5.00
  11   7  -4   74.69    5.40
  11   7  -4   86.69    4.90
  11   7  -4   87.69    5.00
   9  -7  -4  319.07   16.80
  -9  -7   4  303.97   18.10
  -9  -7   4  274.97   18.20
  -9  -7   4  300.87   17.40
   9  -7  -4  304.17   16.60
   9  -7  -4  297.17   17.50
   9  -7  -4  309.27   16.70
   9   7  -4  306.37   17.50
  -9   7   4  291.97   18.40
  -7  -7   4  595.24   36.50
  -7  -7   4  649.64   33.60
  -7  -7   4  596.94   34.60
   7  -7  -4  611.34   33.90
  -7   7   4  595.34   35.60
   7   7  -4  564.64   32.80
   7   7  -4  604.74   35.40
   5  -7  -4  345.37   19.40
  -5  -7   4  356.16   21.70
  -5  -7   4  375.46   20.90
  -5  -7   4  349.37   19.70
   5  -7  -4  341.17   19.30
  -5  -7   4  356.36   20.30
  -5  -7   4  391.76   22.70
   5  -7  -4  343.87   19.50
  -5   7   4  346.77   24.50
   5   7  -4  334.87   19.60
   5   7  -4  347.77   21.00
   5   7  -4  329.07   19.40
  -5   7   4  357.06   20.30
   5   7  -4  331.37   20.30
   5   7  -4  325.77   19.40
  -5   7   4  369.56   21.40
  -5   7   4  376.66   26.20
  -5   7   4  349.47   20.60
   5   7  -4  344.67   19.40
   5   7  -4  381.96   21.50
   3  -7  -4  168.78    9.60
   3  -7  -4  142.79    9.60
   3  -7  -4  155.48    9.50
  -3  -7   4  142.69   10.10
  -3  -7   4  169.18    9.90
  -3  -7   4  166.78    9.80
  -3  -7   4  176.18   10.90
   3  -7  -4  160.78    9.40
   3   7  -4  156.78    9.20
  -3   7   4  159.48    9.90
  -3   7   4  165.88   10.00
  -3   7   4  161.58   10.30
   3   7  -4  164.08   10.30
  -3   7   4  139.29   12.60
   3   7  -4  153.08    9.40
   3   7  -4  168.28    9.70
   3   7  -4  155.58   10.10
   3   7  -4  155.78    9.10
  -1  -7   4  798.82   45.80
  -1   7   4  870.31   49.30
   1  -7   4 3304.67  172.78
   1   7   4 2861.51  187.98
  -3  -7  -4  254.77   14.80
  -3  -7  -4  253.27   15.20
  -3  -7  -4  269.07   15.10
   3   7   4  253.57   15.10
  -3   7  -4  234.18   14.90
  -3   7  -4  234.18   14.60
   5  -7   4  815.02   41.90
   5  -7   4  746.73   42.00
   5  -7   4  804.92   43.20
  -5  -7  -4  702.63   43.00
   5  -7   4  715.83   42.50
   5  -7   4  786.62   41.50
   5  -7   4  783.22   41.60
   5  -7   4  813.02   41.90
  -5  -7  -4  767.82   44.00
   5  -7   4  677.83   44.40
   5   7   4  742.83   43.20
   7  -7   4   81.69    4.90
   7  -7   4   83.19    6.20
   7  -7   4   82.19    5.00
   7  -7   4   81.89    8.30
   7  -7   4   91.29    5.60
  -7  -7  -4   90.49    7.10
   7  -7   4   87.29    5.30
   7  -7   4   75.69    6.20
   7  -7   4   86.19    5.50
   7  -7   4   86.89    6.90
   7  -7   4   76.19    5.10
   7  -7   4   81.29    5.10
  -7  -7  -4   84.99    8.00
   7  -7   4   90.79    5.70
  -7  -7  -4   91.49    5.70
   7   7   4   79.49    5.80
   7   7   4   87.39    6.60
   7   7   4   86.89    5.20
   7   7   4   83.59    5.60
   7   7   4   78.19    5.10
   9  -7   4   88.69    5.40
   9  -7   4   87.39    5.20
   9  -7   4   88.69    5.00
   9  -7   4   96.69    5.20
   9  -7   4   87.69    5.40
   9  -7   4   93.59    5.30
   9  -7   4   77.09    6.60
   9  -7   4   93.19    5.80
   9   7   4   83.19    6.10
   9   7   4   85.19    5.40
   9   7   4   85.49    5.20
   9   7   4   85.59    5.30
  10  -8  -4  194.48   11.20
  10  -8  -4  203.68   11.20
  10  -8  -4  197.28   11.80
  10  -8  -4  208.28   11.30
  10   8  -4  185.88   11.90
 -10   8   4  211.58   12.60
 -10   8   4  211.98   12.80
   8  -8  -4  165.98    9.40
  -8  -8   4  162.18    9.90
   8  -8  -4  168.08    9.20
  -8  -8   4  163.48   13.70
   8  -8  -4  149.39    9.50
  -8  -8   4  170.08   10.50
   8  -8  -4  163.88    9.20
  -8  -8   4  168.98   10.90
   8  -8  -4  150.58   10.10
  -8   8   4  150.28   11.60
   8   8  -4  167.78   10.20
  -8   8   4  143.39   15.60
  -8   8   4  165.78   11.00
   8   8  -4  159.78   11.50
  -8   8   4  176.28   10.80
  -6  -8   4  190.88   11.70
   6  -8  -4  174.28   10.60
  -6  -8   4  201.68   11.20
  -6  -8   4  182.18   13.30
   6  -8  -4  181.08   10.70
  -6  -8   4  208.48   12.20
  -6  -8   4  189.78   14.10
  -6  -8   4  197.38   11.30
   6  -8  -4  181.48   10.80
   6  -8  -4  181.68   11.20
  -6   8   4  212.28   12.00
  -6   8   4  195.68   12.90
  -6   8   4  186.08   17.90
  -6   8   4  193.38   16.60
   6   8  -4  165.58   10.60
   6   8  -4  178.28   11.50
  -6   8   4  216.58   12.40
   6   8  -4  184.68   12.80
  -4  -8   4  437.76   26.00
  -4  -8   4  399.36   26.20
  -4  -8   4  416.06   24.20
  -4   8   4  439.16   30.00
   4   8  -4  461.75   25.10
   4   8  -4  459.55   25.60
  -4   8   4  451.55   25.80
   4   8  -4  481.85   24.70
  -4   8   4  396.16   24.90
  -4   8   4  421.36   29.20
   4   8  -4  453.95   25.90
  -2  -8   4  189.88   11.90
   2  -8  -4  173.68   11.30
  -2  -8   4  190.88   11.20
   2  -8  -4  186.68   11.20
   2  -8  -4  200.98   11.10
  -2   8   4  179.58   11.50
  -2   8   4  186.88   12.50
   2   8  -4  195.18   11.10
  -2   8   4  190.68   11.80
   2   8  -4  175.78   10.70
   2   8  -4  202.38   11.60
   2   8  -4  194.38   11.60
   2   8  -4  190.38   11.20
   2   8  -4  195.48   11.90
  -2   8   4  174.08   11.30
   0   8   4  653.03   41.90
   0   8   4  733.43   39.60
   0   8   4  703.23   39.00
   0   8   4  753.32   39.50
   2   8   4  748.13   42.30
   2   8   4  752.72   41.90
  -2   8  -4  756.22   42.50
   2   8   4  795.22   44.30
   4  -8   4  609.14   32.10
   4  -8   4  592.64   31.30
   4  -8   4  576.74   32.90
   4  -8   4  613.24   31.50
  -4  -8  -4  604.24   32.80
  -4  -8  -4  588.44   33.50
  -4  -8  -4  589.34   33.10
  -4   8  -4  564.64   32.80
   4   8   4  561.84   32.90
  -4   8  -4  503.25   32.10
   4   8   4  521.05   35.50
   4   8   4  542.45   31.70
   6  -8   4  572.14   29.10
   6  -8   4  544.55   30.60
  -6  -8  -4  508.65   30.60
   6  -8   4  506.15   32.20
   6  -8   4  543.95   29.10
   6  -8   4  495.55   29.10
   6  -8   4  487.85   28.40
   6  -8   4  519.75   28.80
   6  -8   4  523.05   28.70
   6  -8   4  514.75   28.60
   6  -8   4  503.55   29.70
   6  -8   4  521.95   29.90
   6  -8   4  548.35   28.50
  -6  -8  -4  530.05   31.10
   6   8   4  523.85   29.20
   6   8   4  498.05   29.30
   6   8   4  518.45   28.70
   6   8   4  529.75   28.70
   8  -8   4  167.18    9.50
  -8  -8  -4  170.38   10.40
   8  -8   4  176.08   10.20
   8  -8   4  171.08    9.60
   8  -8   4  148.79   11.30
   8  -8   4  179.58    9.90
  -8  -8  -4  161.88   11.50
   8  -8   4  181.68    9.70
   8  -8   4  172.28    9.70
  -8  -8  -4  160.28    9.80
   8   8   4  180.98   10.30
   8   8   4  166.68   10.50
   8   8   4  160.68    9.60
   8   8   4  160.18    9.90
   8   8   4  176.08    9.80
  10  -8   4   21.20    1.70
 -10  -8  -4   26.40    2.30
  10  -8   4   22.10    2.70
  10  -8   4   19.70    1.80
  10  -8   4   23.70    1.60
 -10  -8  -4   26.70    1.90
  10   8   4   21.60    1.50
  10   8   4   24.30    1.80
  10   8   4   21.90    1.70
  10   8   4   23.70    1.90
   9  -9  -4  104.09    7.00
   9  -9  -4  107.19    6.20
  -9  -9   4   96.89    7.50
   9  -9  -4  108.99    6.20
   9  -9  -4  106.59    6.40
  -9   9   4  104.79    7.80
   9   9  -4  115.49    7.10
   7  -9  -4   21.00    2.70
  -7  -9   4   21.20    2.40
  -7  -9   4   27.10    2.70
  -7  -9   4   26.40    2.70
   7  -9  -4   20.70    2.10
  -7  -9   4   23.80    3.00
  -7  -9   4   25.40    4.40
   7  -9  -4   22.60    2.00
   7  -9  -4   19.80    1.70
   7  -9  -4   24.30    1.80
  -7   9   4   22.80    6.40
  -7   9   4   15.80    3.30
   7   9  -4   22.50    1.60
  -7   9   4   18.30    2.90
  -7   9   4   23.30    3.50
   7   9  -4   24.60    3.40
   7   9  -4   25.10    2.50
  -7   9   4   23.00    9.20
  -5  -9   4  237.18   16.50
   5  -9  -4  238.08   13.40
  -5  -9   4  229.78   13.70
  -5  -9   4  223.18   13.80
  -5  -9   4  221.28   16.00
   5  -9  -4  247.88   14.00
  -5  -9   4  268.47   14.80
   5   9  -4  236.78   13.60
  -5   9   4  211.98   19.60
   5   9  -4  247.08   13.70
   5   9  -4  239.68   13.40
   5   9  -4  256.97   15.70
   5   9  -4  244.48   15.30
   5   9  -4  237.68   13.50
  -5   9   4  249.68   15.40
  -5   9   4  214.08   18.80
  -5   9   4  235.38   14.60
   5   9  -4  264.17   14.40
  -5   9   4  251.77   14.90
   5   9  -4  235.68   14.60
   3  -9  -4   12.60    1.40
   3  -9  -4   10.50    1.40
   3   9  -4   12.00    1.60
   3   9  -4   12.90    1.50
  -3   9   4   13.10    5.20
   3   9  -4   16.30    2.10
   3   9  -4   11.90    1.30
   3   9  -4   12.10    2.00
  -3   9   4   14.20    2.60
  -3   9   4   15.40    2.40
  -3   9   4   13.60    2.20
  -3   9   4    9.90    4.10
   3   9  -4   11.60    1.90
   3   9  -4   11.30    1.20
   1  -9  -4   48.70    3.60
   1  -9  -4   44.70    3.70
  -1  -9   4   51.99    3.60
  -1  -9   4   53.99    3.70
   1  -9  -4   49.30    3.40
  -1   9   4   50.39    6.70
  -1   9   4   53.19    5.00
   1   9  -4   46.90    3.20
   1   9  -4   47.70    4.10
  -1   9   4   54.59    4.20
   1   9  -4   52.09    3.90
  -1   9   4   44.90    3.60
   1   9  -4   49.00    3.50
   1   9  -4   49.30    3.90
  -1   9   4   52.79    3.60
  -1   9   4   52.69    4.00
   1   9  -4   43.10    3.20
   1   9  -4   47.10    3.50
   1  -9   4  106.39    6.40
  -1  -9  -4  113.89    7.40
  -1  -9  -4  120.89    7.30
  -1  -9  -4  123.29    7.70
  -1  -9  -4  108.09    6.40
  -1  -9  -4  106.39    6.30
  -1  -9  -4  102.89    6.80
  -1   9  -4  109.19    7.20
  -1   9  -4  117.99    6.90
   1   9   4  113.59    7.20
   1   9   4  102.09    6.70
  -1   9  -4  110.59    6.60
   1   9   4  100.79    9.00
  -1   9  -4  112.09    6.80
  -1   9  -4  116.09    6.40
  -1   9  -4  117.09    7.50
   1   9   4  105.49    6.80
   1   9   4  128.99    9.10
   1   9   4  101.19    7.70
  -3  -9  -4  116.39    8.40
  -3  -9  -4  120.69    8.60
  -3  -9  -4  125.09    7.10
  -3  -9  -4  119.49    6.90
  -3  -9  -4  123.09    8.10
   3   9   4  127.89    8.60
  -3   9  -4  112.69    7.90
  -3   9  -4  124.69    7.50
  -3   9  -4  120.29    6.80
  -3   9  -4  103.09    8.30
   3   9   4  129.79    9.70
  -5  -9  -4  227.18   13.90
   5  -9   4  212.38   11.90
   5  -9   4  222.78   12.30
   5  -9   4  201.78   13.60
   5  -9   4  193.98   11.90
  -5  -9  -4  222.28   13.80
  -5  -9  -4  238.88   15.00
  -5  -9  -4  205.88   11.80
   5  -9   4  217.88   13.00
   5  -9   4  212.38   12.40
   5  -9   4  221.68   15.00
  -5  -9  -4  214.38   12.30
   5  -9   4  235.58   12.60
   5  -9   4  210.48   12.90
  -5  -9  -4  216.28   12.00
   5  -9   4  196.98   11.80
   5  -9   4  224.48   12.20
   5   9   4  194.98   12.00
   5   9   4  210.08   13.90
   5   9   4  210.08   12.40
  -5   9  -4  186.88   13.80
  -7  -9  -4   20.40    3.20
   7  -9   4   23.10    1.70
   7  -9   4   26.50    2.00
   7  -9   4   28.00    2.40
  -7  -9  -4   25.70    3.70
   7  -9   4   22.80    2.30
   7  -9   4   22.20    1.90
   7  -9   4   23.20    3.40
   7  -9   4   23.60    2.70
   7  -9   4   26.80    1.90
  -7  -9  -4   20.30    2.30
   7  -9   4   26.90    4.10
   7  -9   4   21.60    2.10
  -7  -9  -4   20.90    2.00
   7  -9   4   21.90    2.10
   7   9   4   24.30    1.90
   7   9   4   28.00    2.40
   7   9   4   24.50    2.00
   7   9   4   23.30    2.10
   7   9   4   26.70    3.20
   7   9   4   21.70    2.40
   9  -9   4   11.90    1.00
   9  -9   4   11.50    1.40
   9  -9   4    9.70    2.30
   9  -9   4   12.00    1.20
   9  -9   4   10.30    1.40
  -9  -9  -4   10.00    1.30
   9  -9   4    9.90    1.30
   9  -9   4   12.50    1.10
  -9  -9  -4   12.70    2.50
   9  -9   4   10.50    1.20
  -9  -9  -4   11.20    1.70
   9   9   4   10.70    1.20
   9   9   4   13.50    1.30
   9   9   4   11.90    1.40
   9   9   4   10.40    1.80
   9   9   4   12.10    1.10
  10 -10  -4   92.09    5.10
  10 -10  -4   90.89    5.10
  10 -10  -4   94.99    5.70
  10 -10  -4   97.29    5.30
 -10  10   4   89.49    6.50
 -10  10   4   82.49    6.40
 -10  10   4   82.29    6.50
  10  10  -4   84.99    5.80
  -8 -10   4  219.98   14.10
   8 -10  -4  221.58   13.00
   8 -10  -4  244.88   12.70
   8 -10  -4  239.18   12.50
  -8 -10   4  210.28   13.20
   8 -10  -4  234.38   12.50
   8 -10  -4  204.68   12.60
   8 -10  -4  233.78   13.50
  -8 -10   4  212.68   17.50
   8  10  -4  237.38   13.60
  -8  10   4  232.58   14.40
   8  10  -4  209.98   16.10
  -8  10   4  193.48   14.70
  -8  10   4  218.88   14.30
  -6 -10   4  480.15   27.60
   6 -10  -4  459.35   27.30
  -6 -10   4  536.75   31.20
   6 -10  -4  518.55   28.20
  -6 -10   4  502.75   28.80
   6 -10  -4  517.45   27.20
  -6 -10   4  516.35   27.90
   6  10  -4  439.66   27.20
  -6  10   4  487.05   28.60
  -6  10   4  533.35   29.80
  -6  10   4  426.56   34.00
   6  10  -4  508.25   30.00
   6  10  -4  520.65   28.40
  -4 -10   4  253.67   15.80
   4 -10  -4  228.98   14.40
  -4 -10   4  257.47   14.90
  -4 -10   4  269.17   16.90
   4 -10  -4  244.08   15.00
  -4 -10   4  264.07   15.60
   4  10  -4  258.57   14.90
   4  10  -4  270.37   16.60
  -4  10   4  272.57   15.90
   4  10  -4  269.37   16.40
  -4  10   4  294.77   17.60
  -4  10   4  256.07   15.90
   4  10  -4  262.97   14.80
  -4  10   4  272.47   16.50
   4  10  -4  261.17   15.30
   4  10  -4  252.27   14.60
   4  10  -4  277.47   16.60
   4  10  -4  245.18   14.60
   4  10  -4  273.67   15.80
  -2 -10   4  372.76   21.40
  -2  10   4  384.26   21.90
  -2  10   4  398.96   21.70
   2  10  -4  345.87   21.90
   2  10  -4  344.87   21.50
   2  10  -4  357.96   20.90
  -2  10   4  397.66   21.40
  -2  10   4  368.06   23.30
  -2  10   4  391.66   21.10
   2  10  -4  348.47   21.10
   2  10  -4  343.97   21.50
   0 -10  -4  346.37   19.20
   0 -10  -4  344.77   20.10
   0 -10  -4  332.97   18.80
   0  10  -4  355.36   19.80
   0  10  -4  381.86   20.40
   0  10   4  318.77   19.40
   0  10   4  354.26   20.80
   0  10   4  319.17   22.30
   0  10   4  335.57   19.00
   0  10   4  314.17   18.90
  -2 -10  -4  543.15   30.40
  -2 -10  -4  514.15   29.60
  -2 -10  -4  535.35   30.10
  -2  10  -4  469.85   28.40
   2  10   4  509.65   28.90
  -2  10  -4  523.25   29.80
   2  10   4  503.45   29.00
   2  10   4  493.85   28.50
  -2  10  -4  522.85   29.90
   2  10   4  565.94   31.70
   2  10   4  576.54   30.50
   2  10   4  502.45   29.40
   4 -10   4  354.56   19.10
   4 -10   4  353.36   18.80
   4 -10   4  326.67   19.40
   4 -10   4  324.77   20.30
   4 -10   4  334.77   21.20
   4 -10   4  341.67   18.60
  -4 -10  -4  373.36   20.50
   4 -10   4  314.17   18.70
   4 -10   4  302.97   18.50
   4 -10   4  362.16   18.60
   4 -10   4  374.46   19.30
   4 -10   4  355.06   19.20
  -4 -10  -4  342.97   21.20
  -4 -10  -4  347.47   18.60
  -4  10  -4  313.77   19.90
  -4  10  -4  318.47   18.40
   4  10   4  307.97   19.00
   4  10   4  344.87   20.70
  -4  10  -4  314.37   20.80
   6 -10   4  700.93   37.10
  -6 -10  -4  657.13   39.20
   6 -10   4  644.84   36.70
   6 -10   4  700.73   37.90
  -6 -10  -4  668.53   38.70
   6 -10   4  625.54   38.60
   6 -10   4  717.73   37.30
   6 -10   4  705.13   36.90
  -6 -10  -4  682.63   40.30
   6 -10   4  665.23   36.50
   6 -10   4  655.73   37.70
   6  10   4  646.44   37.20
   6  10   4  645.74   37.30
   8 -10   4  113.79    6.40
   8 -10   4  107.49    6.60
  -8 -10  -4  106.79    7.10
   8 -10   4  102.59    6.40
   8 -10   4  119.99    6.80
  -8 -10  -4  110.89    6.60
  -8 -10  -4  103.09    8.10
   8 -10   4  111.49    6.20
   8 -10   4  110.09    6.80
   8 -10   4  104.39    8.10
   8 -10   4  104.79    6.40
   8 -10   4  112.89    6.80
   8  10   4  104.59    6.50
   8  10   4  101.69    6.40
   8  10   4  119.69    6.80
   8  10   4  122.99    7.00
   8  10   4   95.79    7.00
  10 -10   4  113.29    7.50
  10 -10   4  105.29    6.40
 -10 -10  -4  120.19    6.70
  10 -10   4  113.29    6.60
  10  10   4  110.39    6.50
  10  10   4  110.49    6.70
  10  10   4  125.19    6.60
   9 -11  -4   11.90    1.90
  -9 -11   4   11.90    2.00
   9 -11  -4   11.10    1.30
  -9 -11   4   10.80    1.80
   9 -11  -4   12.70    1.10
   9 -11  -4    9.80    1.10
   9  11  -4    9.20    1.60
  -9  11   4    4.10    4.50
  -9  11   4    8.20    2.50
  -9  11   4   11.30    2.30
   7 -11  -4  128.39    7.20
   7 -11  -4  124.09    7.20
  -7 -11   4  131.49    8.80
  -7 -11   4  120.59   10.60
   7 -11  -4  118.19    7.40
   7 -11  -4  121.69    8.20
   7 -11  -4  127.89    7.60
  -7 -11   4  115.19    7.90
   7  11  -4  133.79    8.40
   7  11  -4  131.19    9.90
  -7  11   4  135.19    9.20
  -7  11   4  128.19    9.10
   7  11  -4  131.29    7.20
  -7  11   4  113.69    9.40
  -7  11   4  116.19   10.60
   5 -11  -4   74.99    5.10
  -5 -11   4   88.29    7.60
   5 -11  -4   82.69    5.80
  -5 -11   4   95.19    6.40
   5 -11  -4   86.49    5.50
  -5 -11   4   87.09    5.50
   5 -11  -4   84.19    4.90
  -5 -11   4   79.39    6.60
   5 -11  -4   77.39    4.90
  -5  11   4   88.69    7.00
   5  11  -4   84.19    5.20
   5  11  -4   86.99    7.30
   5  11  -4   80.79    6.30
   5  11  -4   76.19    5.10
   5  11  -4   85.09    5.40
  -5  11   4   88.89    6.70
   5  11  -4   82.29    5.10
  -5  11   4   89.29    8.10
  -5  11   4   80.29    6.60
   5  11  -4   86.49    6.00
   5  11  -4   78.99    6.80
  -3 -11   4   66.59    4.40
  -3 -11   4   67.89    5.10
   3 -11  -4   76.29    4.70
  -3 -11   4   65.99    5.60
   3 -11  -4   70.19    4.60
  -3 -11   4   73.39    5.10
   3  11  -4   73.69    6.00
   3  11  -4   68.99    4.50
   3  11  -4   76.39    5.30
  -3  11   4   55.99    8.80
  -3  11   4   65.29    5.40
   3  11  -4   75.09    5.90
  -3  11   4   67.89    6.90
   3  11  -4   73.09    5.00
  -3  11   4   70.79    5.80
  -3  11   4   75.99    5.60
   3  11  -4   71.09    5.70
  -3  11   4   63.19    5.40
   3  11  -4   62.59    4.30
   3  11  -4   66.19    4.40
   3  11  -4   62.39    4.20
  -1 -11   4   15.90    1.90
   1 -11  -4   15.50    2.10
   1 -11  -4   17.90    1.90
   1 -11  -4   20.30    1.80
  -1 -11   4   16.90    1.80
[truncated: 411,978 more chars]
